# Supplementary material for: A human ESC-based screen identifies a role for the translated lncRNA LINC00261 in pancreatic endocrine differentiation
Source: eLife. 2020 Aug 3;9:e58659. doi: 10.7554/eLife.58659 (PMC7423336; doi:10.7554/eLife.58659)
Supplement: Figure 1—source data 1. — (A) Gene expression during pancreatic differentiation (RPKM). (B) lncRNA-proximal TFs, by cluster in correlation heatmap (Figure 1—figure supplement 1C). (C) GO enrichment and KEGG pathway analysis for each cluster in the correlation heatmap (Figure 1—figure supplement 1D). [file elife-58659-fig1-data1.xlsx]

## Sheet: Table info
Figure 1–Source data 1	Identification, regulation, and characterization of lncRNAs during pancreatic differentiation
S1A	Gene expression during pancreatic differentiation (RPKM)
S1B	lncRNA-proximal TFs by cluster in correlation heatmap (Figure S1C)
S1C	GO enrichment and KEGG pathway analysis for each cluster in the correlation heatmap (Figure S1D)

## Sheet: S1A
chromosome	start	end	strand	gene_id	gene_short_name	biotype	category	expression	ES_rep1	ES_rep2	ES_average	DE_rep1	DE_rep2	DE_average	GT_rep1	GT_rep2	GT_average	PP1_rep1	PP1_rep2	PP1_average	PP2_rep1	PP2_rep2	PP2_average
chr1	11868	14409	+	ENSG00000223972	DDX11L1	transcribed_unprocessed_pseudogene	other	never	0.0539977	0.0709465	0.0624721	0.113975	0.163969	0.138972	0.267324	0.255356	0.26134	0.341006	0.26214	0.301573	0.322377	0.422304	0.372341
chr1	29553	31109	+	ENSG00000243485	MIR1302-2	lincRNA	lncRNA	pp1_restricted	0.203783	0.342431	0.273107	0.119685	0.0476316	0.0836583	0.232657	0.438228	0.335442	1.44015	1.08271	1.26143	2.11005	0.124176	1.11711
chr1	14403	29570	-	ENSG00000227232	WASH7P	unprocessed_pseudogene	other	constitutive	3.35001	3.87786	3.61394	5.97478	5.3732	5.67399	7.1884	6.54417	6.86629	13.0934	11.0778	12.0856	8.05593	6.27264	7.16428
chr1	17368	17436	-	ENSG00000278267	MIR6859-1	miRNA	other	never	0	0	0	0	0	0	0	0	0	0	0	0	0	0	0
chr1	34553	36081	-	ENSG00000237613	FAM138A	lincRNA	lncRNA	never	0.0353641	0.0421107	0.0387374	0.00427902	0.00390802	0.00409352	0.00665785	0.00650336	0.0065806	0.346236	0.374977	0.360606	0.0973976	0.0824739	0.0899357
chr1	52472	53312	+	ENSG00000268020	OR4G4P	unprocessed_pseudogene	other	never	0	0	0	0	0	0	0	0	0	0	0	0	0	0	0
chr1	62947	63887	+	ENSG00000240361	OR4G11P	unprocessed_pseudogene	other	never	0	0	0	0	0	0	0	0	0	0	0	0	0	0	0
chr1	69090	70008	+	ENSG00000186092	OR4F5	protein_coding	coding	never	0	0	0	0	0	0	0	0	0	0	0	0	0	0	0
chr1	89294	133723	-	ENSG00000238009	RP11-34P13.7	lincRNA	lncRNA	stage_specific	2.24722	2.54763	2.39743	1.2562	2.26428	1.76024	1.14236	0.478817	0.810589	1.89719	1.39679	1.64699	1.9524	0.807221	1.37981
chr1	89550	91105	-	ENSG00000239945	RP11-34P13.8	lincRNA	lncRNA	never	0.112129	0.119258	0.115694	0.104593	0.0322881	0.0684406	0.0751835	0.12226	0.0987217	5.12e-05	0.197741	0.0988961	0.159376	0.186402	0.172889
chr1	131024	134836	+	ENSG00000233750	CICP27	processed_pseudogene	other	never	0.0107772	0.0361713	0.0234742	0.024068	0.0163968	0.0202324	0.0085557	0.0102708	0.00941325	0.836834	1.21236	1.0246	0.0319169	0.0364942	0.0342056
chr1	135140	135895	-	ENSG00000268903	RP11-34P13.15	processed_pseudogene	other	constitutive	8.75949	12.2998	10.5296	12.6121	9.43541	11.0238	6.32518	4.36243	5.3438	6.32772	6.1874	6.25756	6.78293	5.1733	5.97811
chr1	137681	137965	-	ENSG00000269981	RP11-34P13.16	processed_pseudogene	other	constitutive	24.2554	45.9244	35.0899	41.1792	30.9467	36.063	18.8846	12.2525	15.5686	17.7243	17.0725	17.3984	19.5347	14.1646	16.8497
chr1	139789	140339	-	ENSG00000239906	RP11-34P13.14	antisense	lncRNA	constitutive	4.33956	6.91941	5.62948	5.50363	4.69634	5.09999	3.03304	2.8752	2.95412	3.41263	2.43597	2.9243	3.94761	2.00691	2.97726
chr1	141473	173862	-	ENSG00000241860	RP11-34P13.13	processed_transcript	lncRNA	constitutive	3.26185	5.02343	4.14264	4.37885	2.83324	3.60604	1.98149	2.03405	2.00777	2.05842	2.69131	2.37486	2.97297	2.05153	2.51225
chr1	157783	157887	-	ENSG00000222623	RNU6-1100P	snRNA	other	es_restricted	5.24491	2.85657	4.05074	4.04243	0	2.02122	0	0	0	0	0	0	0	3.97729	1.98864
chr1	160445	161525	+	ENSG00000241599	RP11-34P13.9	lincRNA	lncRNA	never	0	0	0	0	0	0	0	0	0	0.296149	0.311315	0.303732	0	0.00401958	0.00200979
chr1	182392	184158	+	ENSG00000279928	FO538757.2	protein_coding	coding	never	0.0235238	0.0409983	0.032261	0.0804341	0.11296	0.0966971	0.135033	0.254101	0.194567	0.218016	0.219464	0.21874	0.29823	0.331795	0.315012
chr1	184922	200322	-	ENSG00000279457	FO538757.1	protein_coding	coding	constitutive	6.0769	6.36354	6.22022	10.2214	10.4944	10.3579	13.2568	10.0217	11.6393	22.2184	20.7545	21.4865	14.5478	11.5254	13.0366
chr1	187890	187958	-	ENSG00000273874	MIR6859-2	miRNA	other	never	0	0	0	0	0	0	0	0	0	0	0	0	0	0	0
chr1	257863	297502	-	ENSG00000228463	AP006222.2	lincRNA	lncRNA	pp1_restricted	0.321433	0.583213	0.452323	1.27554	0.70297	0.989255	0.329837	0.689994	0.509915	1.08868	1.67023	1.37946	0.523366	1.09731	0.810338
chr1	258567	259024	-	ENSG00000241670	RPL23AP21	processed_pseudogene	other	constitutive	1.62574	1.32404	1.47489	3.42769	5.20161	4.31465	1.81447	1.03867	1.42657	4.1976	2.70142	3.44951	2.5031	1.76739	2.13524
chr1	347981	348366	-	ENSG00000236679	RPL23AP24	processed_pseudogene	other	stage_specific	0.688164	0.778972	0.733568	1.64342	1.88762	1.76552	0.835107	0.793175	0.814141	1.94548	1.6657	1.80559	1.28545	1.17044	1.22795
chr1	357382	359681	-	ENSG00000236743	RP5-857K21.15	lincRNA	lncRNA	never	0.0171023	0.00620969	0.011656	0	0.0136874	0.0068437	0.00806155	0.0119568	0.0100092	0	0	0	0.0314882	0.00530545	0.0183968
chr1	358856	366052	+	ENSG00000236601	RP4-669L17.2	lincRNA	lncRNA	never	0	0	0	0	0	0	0	0	0	1.45e-34	0.0109008	0.0054504	0	0.0089478	0.0044739
chr1	487100	489906	+	ENSG00000233653	CICP7	processed_pseudogene	other	never	0.00778762	0.00727278	0.0075302	0.0118132	0.00300758	0.00741039	0.00208665	0.000999671	0.00154316	0.25844	0.356267	0.307354	0.0058955	0.00771385	0.00680467
chr1	365388	501617	-	ENSG00000237094	RP4-669L17.10	lincRNA	lncRNA	constitutive	12.5372	16.3388	14.438	18.6117	13.5318	16.0718	15.8935	15.2827	15.5881	17.0837	15.8002	16.4419	19.9243	14.5656	17.2449
chr1	485025	485208	-	ENSG00000224813	SEPT14P13	transcribed_unprocessed_pseudogene	other	never	0.0563443	6.39e-29	0.0281721	4.76e-51	0	2.38e-51	3.36e-197	2.43e-60	1.21659e-60	1.78e-69	0.153801	0.0769005	0.0367255	0.199952	0.118339
chr1	439869	440232	+	ENSG00000269732	WBP1LP7	processed_pseudogene	other	never	0	0	0	0	0	0	0	0	0	0	0	0	0	0	0
chr1	450739	451678	-	ENSG00000278566	OR4F29	protein_coding	coding	never	0	0.00169847	0.000849235	0.00344146	0	0.00172073	0.00636997	0.00218028	0.00427513	0	0.00424895	0.00212447	0.00645947	0.00150489	0.00398218
chr1	491224	493241	-	ENSG00000250575	RP4-669L17.8	unprocessed_pseudogene	other	constitutive	5.26982	7.68495	6.47738	7.52088	6.19206	6.85647	4.36638	3.44769	3.90704	4.39121	4.42721	4.40921	4.42215	3.24675	3.83445
chr1	516375	516479	-	ENSG00000278757	U6	snRNA	other	es_restricted	5.24491	2.85657	4.05074	0	0	0	0	0	0	0	0	0	0	0	0
chr1	585988	827796	-	ENSG00000230021	RP5-857K21.4	lincRNA	lncRNA	never	0.696267	0.488472	0.592369	0.367469	0.315621	0.341545	0.25726	0.295964	0.276612	0.630617	0.631624	0.63112	0.691741	0.616005	0.653873
chr1	720023	720206	-	ENSG00000283574	RP11-206L10.17	transcribed_processed_pseudogene	other	never	1.19e-42	0.160742	0.080371	6.95e-102	0	3.48e-102	2.52e-60	0.059284	0.029642	8.06e-88	0.711654	0.355827	1.27e-45	0.80232	0.40116
chr1	826205	827522	-	ENSG00000225880	LINC00115	lincRNA	lncRNA	stage_specific	0.840166	0.852596	0.846381	1.28603	0.59482	0.940425	1.82784	1.42006	1.62395	0.955794	0.817114	0.886454	1.3939	1.12274	1.25832
chr1	587628	594768	+	ENSG00000235146	RP5-857K21.2	lincRNA	lncRNA	never	0	0	0	0	0	0	0	0	0	0	0.0125042	0.0062521	0	0.0103632	0.0051816
chr1	722091	724903	+	ENSG00000229376	CICP3	processed_pseudogene	other	never	0.00377618	0.00455335	0.00416476	0.00397942	0.00303708	0.00350825	0.00210711	0.000656159	0.00138163	0.262699	0.432118	0.347409	0.00502287	0.0101307	0.00757678
chr1	825137	859446	+	ENSG00000228794	LINC01128	processed_transcript	lncRNA	constitutive	4.74065	3.44544	4.09305	4.65906	5.31256	4.98581	15.2219	11.123	13.1724	7.7137	6.7169	7.2153	10.8446	9.03866	9.94163
chr1	629061	629433	+	ENSG00000225972	MTND1P23	unprocessed_pseudogene	other	constitutive	734.432	558.327	646.38	518.041	660.88	589.461	718.812	629.173	673.992	477.633	633.622	555.628	445.962	608.843	527.403
chr1	629639	630683	+	ENSG00000225630	MTND2P28	unprocessed_pseudogene	other	constitutive	701.683	492.506	597.095	370.52	501.825	436.173	514.544	373.396	443.97	303.656	314.786	309.221	360.742	471.909	416.325
chr1	631073	632616	+	ENSG00000237973	MTCO1P12	unprocessed_pseudogene	other	constitutive	2280.52	1766.79	2023.65	1751.39	1969.57	1860.48	1780.3	1588.81	1684.56	1607.61	1148.66	1378.13	1474.02	1215.6	1344.81
chr1	632324	632413	-	ENSG00000278791	MIR6723	miRNA	other	never	0	0	0	0	0	0	0	0	0	0	0	0	0	0	0
chr1	632756	633438	+	ENSG00000229344	MTCO2P12	unprocessed_pseudogene	other	constitutive	255.673	187.458	221.565	184.63	235.721	210.175	247.943	202.682	225.312	197.37	178.901	188.136	193.902	150.324	172.113
chr1	633534	633741	+	ENSG00000240409	MTATP8P1	unprocessed_pseudogene	other	stage_specific	3.35109	8.32716	5.83913	3.96225	3.39436	3.6783	4.73885	6.96584	5.85234	0.929246	4.32748	2.62836	2.47899	6.8222	4.6506
chr1	633695	634376	+	ENSG00000248527	MTATP6P1	unprocessed_pseudogene	other	constitutive	2945.8	1967.43	2456.61	1942.63	2509.91	2226.27	2165.81	1757.44	1961.62	1760.95	1528.25	1644.6	1778.15	1871.61	1824.88
chr1	634375	634922	+	ENSG00000198744	MTCO3P12	unprocessed_pseudogene	other	constitutive	386.857	255.357	321.107	213.15	277.131	245.141	286.734	322.13	304.432	262.65	224.385	243.518	266.302	251.118	258.71
chr1	674841	675265	+	ENSG00000268663	WBP1LP6	processed_pseudogene	other	never	0	0	0	0	0	0	0	0	0	0	0	0	0	0	0
chr1	685715	686654	-	ENSG00000273547	OR4F16	protein_coding	coding	never	0	0.00169847	0.000849235	0.00344146	0	0.00172073	0.00636997	0.00218028	0.00427513	0	0.00424895	0.00212447	0.00645947	0.00150489	0.00398218
chr1	725884	778626	-	ENSG00000228327	RP11-206L10.2	transcribed_unprocessed_pseudogene	other	constitutive	3.08441	4.37014	3.72728	4.84166	3.23856	4.04011	3.54079	3.48184	3.51132	3.42747	3.94142	3.68445	3.8443	3.34131	3.5928
chr1	758232	758336	-	ENSG00000223181	RNU6-1199P	snRNA	other	never	0	0	0	0	0	0	0	0	0	0	0	0	45.5248	0	22.7624
chr1	760910	761989	+	ENSG00000229905	RP11-206L10.4	antisense	lncRNA	never	0	0.0147623	0.00738115	0	0	0	0	0	0	0.104952	0.126608	0.11578	0.0102661	0	0.00513305
chr1	778769	810060	+	ENSG00000237491	RP11-206L10.9	lincRNA	lncRNA	constitutive	1.70798	3.15058	2.42928	2.39548	1.44294	1.91921	3.50816	3.78427	3.64622	2.49089	3.83094	3.16092	2.77062	3.57039	3.1705
chr1	800878	817712	-	ENSG00000230092	RP11-206L10.8	transcribed_unprocessed_pseudogene	other	gt_restricted	0.859671	0.386399	0.623035	1.0791	0.434188	0.756644	1.09007	2.31389	1.70198	0.996661	1.80808	1.40237	0.242811	1.34622	0.794516
chr1	817370	819837	+	ENSG00000177757	FAM87B	lincRNA	lncRNA	never	0	0	0	0	0	0	0	0	0	0.100339	0.185508	0.142924	0.0216522	0.0198624	0.0207573
chr1	868070	876903	-	ENSG00000230368	FAM41C	lincRNA	lncRNA	never	0.127225	0.0988529	0.113039	0.147814	0.0945188	0.121166	0.069689	0.0840596	0.0768743	0.0934758	0.345295	0.219385	0.13413	0.210255	0.172192
chr1	874528	877234	-	ENSG00000283040	FAM166AP3	transcribed_unprocessed_pseudogene	other	never	0	0	0	0	0.0304835	0.0152418	0	0	0	0	0.0236655	0.0118327	0.0200367	0.0315092	0.0257729
chr1	873291	874349	+	ENSG00000234711	TUBB8P11	unprocessed_pseudogene	other	never	0.0484605	0.0808831	0.0646718	0.0877346	0.0243965	0.0560655	0.122321	0.0721326	0.0972268	0.0531737	0.0649734	0.0590736	0.0555081	0.0659529	0.0607305
chr1	904833	915976	+	ENSG00000272438	RP11-54O7.16	lincRNA	lncRNA	gt_restricted	0.113553	0.49476	0.304156	0.501245	0.954228	0.727737	8.67115	5.20562	6.93839	2.01521	0.748065	1.38164	0.985615	1.4795	1.23256
chr1	911434	914948	+	ENSG00000230699	RP11-54O7.1	lincRNA	lncRNA	stage_specific	0.0247152	0.269636	0.147176	0.43326	0.397034	0.415147	6.71486	3.84604	5.28045	1.54951	1.19629	1.3729	0.837649	0.968555	0.903102
chr1	914170	914971	+	ENSG00000241180	RP11-54O7.2	lincRNA	lncRNA	gt_restricted	0.109319	0.175193	0.142256	0.148727	1.15e-06	0.0743641	3.87739	2.4732	3.1753	1.22853	0.397428	0.812979	0.467561	0.938404	0.702982
chr1	916864	921016	-	ENSG00000223764	RP11-54O7.3	lincRNA	lncRNA	stage_specific	0	0.0815546	0.0407773	0.0685774	0.0738638	0.0712206	7.50114	3.87862	5.68988	1.03274	0.619932	0.826336	2.97095	3.05615	3.01355
chr1	923927	944581	+	ENSG00000187634	SAMD11	protein_coding	coding	stage_specific	0.0870121	0.567122	0.327067	4.91372	6.75853	5.83613	30.0492	18.5101	24.2797	0.978588	0.647566	0.813077	16.1322	21.7627	18.9474
chr1	944203	959309	-	ENSG00000188976	NOC2L	protein_coding	coding	constitutive	56.2311	48.5284	52.3798	38.9606	48.1835	43.572	40.5321	31.9281	36.2301	28.8453	24.4693	26.6573	33.7927	25.7272	29.7599
chr1	960586	965715	+	ENSG00000187961	KLHL17	protein_coding	coding	constitutive	7.26409	14.87	11.067	19.1714	16.477	17.8242	18.6535	9.54527	14.0994	13.7248	13.3068	13.5158	13.6876	12.393	13.0403
chr1	966496	975865	+	ENSG00000187583	PLEKHN1	protein_coding	coding	gt_restricted	0.646235	1.82197	1.2341	0.996199	0.801969	0.899084	1.82328	1.00657	1.41492	0.670419	0.348211	0.509315	0.564704	0.280156	0.42243
chr1	975203	982093	-	ENSG00000187642	PERM1	protein_coding	coding	never	0	0.0693842	0.0346921	0.0502388	0.0191281	0.0346834	0.0149521	0	0.00747605	0.261515	0.397936	0.329726	0	0.0296118	0.0148059
chr1	995965	998051	-	ENSG00000272512	RP11-54O7.17	lincRNA	lncRNA	pp2_restricted	0.0169365	0.106079	0.0615077	0.0267004	0.020332	0.0235162	0.0958008	0.0710453	0.083423	0.288047	0.365153	0.3266	1.06245	1.07795	1.0702
chr1	998961	1000172	-	ENSG00000188290	HES4	protein_coding	coding	constitutive	2.90367	9.90495	6.40431	5.56736	5.81862	5.69299	10.3556	5.22831	7.79195	18.8396	15.4446	17.1421	51.2944	37.615	44.4547
chr1	1001137	1014541	+	ENSG00000187608	ISG15	protein_coding	coding	constitutive	44.3682	43.8366	44.1024	42.0938	50.3707	46.2323	26.0103	14.5149	20.2626	65.1304	38.7965	51.9635	50.1727	28.4114	39.2921
chr1	1008075	1008229	-	ENSG00000231702	RP11-54O7.10	processed_pseudogene	other	never	0	0.454334	0.227167	0	0	0	0	1.99959	0.999795	0	2.99756	1.49878	0.493681	0	0.24684
chr1	1011996	1013193	-	ENSG00000224969	RP11-54O7.11	antisense	lncRNA	never	0	0.100132	0.050066	0.0386454	0	0.0193227	0	0	0	0.0906329	0.440427	0.26553	0.0967143	0.0380226	0.0673684
chr1	1020122	1056118	+	ENSG00000188157	AGRN	protein_coding	coding	constitutive	31.1224	49.7361	40.4293	47.8276	46.9001	47.3638	108.316	67.2855	87.8007	74.7132	62.7361	68.7246	108.336	67.5351	87.9356
chr1	1055032	1056116	+	ENSG00000242590	RP11-54O7.14	sense_intronic	lncRNA	constitutive	3.94687	15.3635	9.65518	16.2988	11.5878	13.9433	32.8234	19.9515	26.3875	14.1884	25.8825	20.0355	31.684	35.4202	33.5521
chr1	1059733	1069355	+	ENSG00000217801	RP11-465B22.3	transcribed_unprocessed_pseudogene	other	stage_specific	4.04786	4.3169	4.18238	2.14696	1.80361	1.97528	1.67776	0.906447	1.2921	2.76114	2.36995	2.56555	1.01928	1.15028	1.08478
chr1	1062207	1063288	-	ENSG00000273443	RP11-54O7.18	lincRNA	lncRNA	never	0	0.0420274	0.0210137	0	0	0	0	0	0	0.190203	0.208926	0.199565	0	0	0
chr1	1070965	1074307	-	ENSG00000237330	RNF223	protein_coding	coding	never	0	0.0102286	0.0051143	0	0	0	0	0	0	0.0277747	0.0731089	0.0504418	0.0222288	0.0291304	0.0256796
chr1	1081817	1116361	-	ENSG00000131591	C1orf159	protein_coding	coding	constitutive	3.54568	4.85772	4.2017	4.53031	4.65553	4.59292	7.78866	6.91975	7.35421	7.57858	5.97606	6.77732	9.59238	6.47255	8.03247
chr1	1137016	1144056	+	ENSG00000223823	LINC01342	lincRNA	lncRNA	never	0.0563552	0.0798022	0.0680787	0.00710753	0	0.00355376	0.0212515	0.00675427	0.0140029	0.133351	0.0675016	0.100426	0.0533621	0.027972	0.0406671
chr1	1167103	1167198	+	ENSG00000207730	MIR200B	miRNA	other	never	0	0	0	0	0	0	0	0	0	0	0	0	0	0	0
chr1	1167862	1167952	+	ENSG00000207607	MIR200A	miRNA	other	never	0	0	0	0	0	0	0	0	0	0	0	0	0	0	0
chr1	1169004	1169087	+	ENSG00000198976	MIR429	miRNA	other	never	0	0	0	0	0	0	0	0	0	0	0	0	0	0	0
chr1	1169356	1170343	+	ENSG00000272141	RP11-465B22.8	lincRNA	lncRNA	stage_specific	0.368597	0.780701	0.574649	1.78202	1.79456	1.78829	2.20079	1.12897	1.66488	3.63415	2.06034	2.84725	3.70026	2.51561	3.10793
chr1	1173055	1179555	-	ENSG00000205231	TTLL10-AS1	antisense	lncRNA	never	0	0.0060744	0.0030372	0.0210995	0.0057382	0.0134188	0	0.0200508	0.0100254	0.262979	0.383934	0.323456	0.0150868	0.0148282	0.0149575
chr1	1173883	1197935	+	ENSG00000162571	TTLL10	protein_coding	coding	pp1_restricted	0.11526	0.0886748	0.101967	0.134116	0.0193144	0.0767152	0.447713	0.447381	0.447547	3.7078	2.53581	3.12181	1.47756	0.638917	1.05824
chr1	1203507	1206691	-	ENSG00000186891	TNFRSF18	protein_coding	coding	de_restricted	0.332834	0.704628	0.518731	2.11834	2.47561	2.29698	0.108306	0.0192909	0.0637985	0.666875	0.279017	0.472946	0.350924	0.224013	0.287469
chr1	1211325	1214138	-	ENSG00000186827	TNFRSF4	protein_coding	coding	never	0	0.0504872	0.0252436	0.0233823	0	0.0116912	0.0174783	0.0525205	0.0349994	0.0548372	0	0.0274186	0.102405	0.0602282	0.0813166
chr1	1216907	1232031	-	ENSG00000078808	SDF4	protein_coding	coding	constitutive	60.8005	54.7861	57.7933	61.9132	75.3498	68.6315	69.2118	49.0092	59.1105	65.453	43.007	54.23	98.1919	51.779	74.9855
chr1	1232264	1235041	+	ENSG00000176022	B3GALT6	protein_coding	coding	constitutive	10.2331	10.9276	10.5803	11.4078	13.9261	12.6669	14.8616	12.2868	13.5742	16.607	13.9337	15.2704	18.6391	12.7594	15.6992
chr1	1242445	1246722	-	ENSG00000184163	FAM132A	protein_coding	coding	stage_specific	1.85099	2.52441	2.1877	4.75443	3.5519	4.15317	2.5313	1.47859	2.00495	1.57149	2.10941	1.84045	1.04665	0.66639	0.85652
chr1	1249776	1251334	-	ENSG00000260179	RP5-902P8.12	lincRNA	lncRNA	never	0.0471609	0.115585	0.0813729	0.0966541	0.113232	0.104943	0.333456	0.0777194	0.205588	0.278988	0.121804	0.200396	0.11164	0.0804663	0.0960532
chr1	1253908	1273885	-	ENSG00000160087	UBE2J2	protein_coding	coding	constitutive	28.6327	26.8583	27.7455	29.3501	30.8756	30.1129	27.8101	20.4588	24.1345	25.2849	24.6096	24.9473	31.6692	26.626	29.1476
chr1	1275222	1280420	+	ENSG00000230415	RP5-902P8.10	lincRNA	lncRNA	stage_specific	0.358429	1.022	0.690214	1.69797	1.39844	1.54821	1.18268	0.698073	0.940376	1.98782	1.87752	1.93267	1.34343	1.44549	1.39446
chr1	1280435	1292029	+	ENSG00000162572	SCNN1D	protein_coding	coding	stage_specific	0.574057	1.34862	0.961338	1.49126	2.36324	1.92725	1.37094	1.02812	1.19953	2.29402	1.58074	1.93738	1.68033	1.37205	1.52619
chr1	1292375	1309609	-	ENSG00000131584	ACAP3	protein_coding	coding	constitutive	6.67735	13.2491	9.96322	6.94181	8.559	7.7504	19.0319	12.5954	15.8137	25.5526	28.2605	26.9065	40.8518	25.5971	33.2244
chr1	1311584	1324691	-	ENSG00000127054	CPSF3L	protein_coding	coding	constitutive	434.519	66.332	250.425	96.5679	415.041	255.804	318.829	80.584	199.707	225.219	99.9449	162.582	160.232	66.041	113.136
chr1	1317580	1318689	-	ENSG00000240731	RP5-890O3.9	sense_intronic	lncRNA	stage_specific	0.729102	3.0775	1.9033	2.47128	0.765867	1.61857	3.17903	1.8023	2.49066	4.31311	6.87731	5.59521	2.73275	3.22309	2.97792
chr1	1308566	1311677	+	ENSG00000169972	PUSL1	protein_coding	coding	constitutive	20.1403	14.3115	17.2259	6.99896	12.8143	9.90663	9.61336	6.22207	7.91772	6.90532	4.37563	5.64048	10.6638	6.48005	8.57193
chr1	1296109	1296170	-	ENSG00000278073	MIR6726	miRNA	other	never	0	0	0	0	0	0	0	0	0	0	0	0	0	0	0
chr1	1324755	1328897	+	ENSG00000224051	CPTP	protein_coding	coding	constitutive	5.42357	4.79612	5.10984	6.50426	7.16311	6.83369	4.80183	4.24994	4.52588	7.82287	6.02891	6.92589	9.69151	6.55469	8.1231
chr1	1331313	1335306	+	ENSG00000169962	TAS1R3	protein_coding	coding	never	0.00985363	0.02415	0.0170018	0.0248548	0.0295729	0.0272139	0.0510921	0.0324768	0.0417845	0.167586	0.295064	0.231325	0.4082	0.284281	0.346241
chr1	1335275	1349350	-	ENSG00000107404	DVL1	protein_coding	coding	constitutive	23.6343	26.3069	24.9706	26.8709	28.8472	27.859	30.3593	20.272	25.3157	20.8718	13.9578	17.4148	25.7559	12.9769	19.3664
chr1	1352688	1361777	-	ENSG00000162576	MXRA8	protein_coding	coding	constitutive	10.1405	14.3122	12.2264	36.5379	29.371	32.9545	28.8426	25.9967	27.4197	37.162	30.9181	34.0401	23.0562	22.848	22.9521
chr1	1373729	1375495	-	ENSG00000175756	AURKAIP1	protein_coding	coding	constitutive	122.438	81.7202	102.079	74.5328	104.971	89.7519	63.4256	44.5183	53.9719	66.8155	41.69	54.2527	69.8073	48.8755	59.3414
chr1	1378665	1379032	+	ENSG00000223663	NDUFB4P8	processed_pseudogene	other	never	0.102135	0.0556267	0.0788809	0	0.122612	0.061306	0.0962876	0	0.0481438	0.302098	0.183504	0.242801	0	0	0
chr1	1385710	1399328	-	ENSG00000221978	CCNL2	protein_coding	coding	constitutive	29.2617	45.3631	37.3124	52.67	43.9747	48.3224	102.182	66.8628	84.5224	107.498	119.492	113.495	107.209	97.8709	102.54
chr1	1399521	1402046	+	ENSG00000224870	RP4-758J18.2	processed_transcript	lncRNA	constitutive	13.8466	9.84603	11.8463	10.6428	13.6078	12.1253	15.8895	10.2688	13.0792	15.8976	9.41424	12.6559	15.7716	11.3628	13.5672
chr1	1401907	1407313	-	ENSG00000242485	MRPL20	protein_coding	coding	constitutive	189.825	88.2044	139.015	67.8818	159.517	113.699	80.6336	64.2253	72.4295	111.181	79.5213	95.3512	109.688	79.3477	94.5178
chr1	1405459	1405752	-	ENSG00000264293	RN7SL657P	misc_RNA	other	stage_specific	3.3125	2.12329	2.71789	1.54123	0.510366	1.0258	2.15831	1.97162	2.06496	4.27548	1.35185	2.81366	3.4729	2.47521	2.97405
chr1	1409095	1410618	+	ENSG00000272455	RP4-758J18.13	lincRNA	lncRNA	constitutive	2.7317	3.26807	2.99988	2.04601	1.03661	1.54131	4.18895	2.59997	3.39446	2.39264	1.54139	1.96701	2.17541	1.5693	1.87235
chr1	1418419	1421769	-	ENSG00000235098	ANKRD65	protein_coding	coding	pp2_restricted	0.684636	0.839965	0.762301	0.751916	0.90475	0.828333	1.44354	0.855664	1.1496	0.915548	0.802943	0.859245	2.85835	2.84763	2.85299
chr1	1420244	1422691	+	ENSG00000225905	RP4-758J18.7	antisense	lncRNA	never	0.191803	0.652893	0.422348	0.453566	0.115128	0.284347	0.0452053	0.201144	0.123175	0.180027	0.259725	0.219876	0.189183	0.0892513	0.139217
chr1	1426127	1427787	+	ENSG00000205116	TMEM88B	protein_coding	coding	never	0.510176	0.648343	0.57926	0.142986	0.0680511	0.105519	0.0534407	0.169849	0.111645	0.503004	0.33949	0.421247	0	0.0703407	0.0351704
chr1	1430538	1434573	-	ENSG00000225285	RP4-758J18.10	lincRNA	lncRNA	never	0.725981	2.37575	1.55087	1.00937	0.438218	0.723794	0.534599	0.270541	0.40257	0.667355	0.300826	0.48409	0.215945	0.180568	0.198257
chr1	1434860	1442882	+	ENSG00000179403	VWA1	protein_coding	coding	constitutive	11.6083	14.2937	12.951	9.18136	9.21106	9.19621	10.8741	8.02899	9.45154	19.2353	14.1669	16.7011	19.2189	13.1122	16.1655
chr1	1449688	1470158	+	ENSG00000215915	ATAD3C	protein_coding	coding	never	0.88902	0.603138	0.746079	0.496906	0.383071	0.439989	0.319287	0.340603	0.329945	0.728505	1.03736	0.882933	1.09138	0.97121	1.0313
chr1	1471768	1497848	+	ENSG00000160072	ATAD3B	protein_coding	coding	constitutive	28.0992	16.8717	22.4855	9.87311	16.4629	13.168	13.9295	7.71624	10.8229	11.4959	8.02425	9.76008	14.1565	8.64541	11.401
chr1	1512150	1534687	+	ENSG00000197785	ATAD3A	protein_coding	coding	constitutive	32.0521	20.4329	26.2425	12.4303	18.5998	15.5151	19.1098	12.408	15.7589	15.5089	9.37336	12.4411	23.0638	11.2879	17.1759
chr1	1535173	1540453	-	ENSG00000205090	TMEM240	protein_coding	coding	constitutive	2.91573	2.95925	2.93749	3.0401	2.7627	2.9014	4.9889	2.74074	3.86482	5.76873	3.1591	4.46392	6.96673	3.72735	5.34704
chr1	1541672	1574869	-	ENSG00000160075	SSU72	protein_coding	coding	constitutive	97.8394	92.0328	94.9361	73.4303	83.1259	78.2781	65.3697	57.0786	61.2242	65.7659	63.9977	64.8818	72.2306	61.3836	66.8071
chr1	1574974	1577075	+	ENSG00000215014	RP5-832C2.5	lincRNA	lncRNA	never	0.33604	0.401518	0.368779	0.301967	0.221876	0.261921	0.26208	0.342337	0.302208	0.410003	0.348557	0.37928	0.385219	0.276252	0.330736
chr1	1579755	1580046	+	ENSG00000279244	AL645728.1	protein_coding	coding	never	0	0	0	0	0	0	0	0	0	0	0	0	0	0	0
chr1	1583509	1583909	-	ENSG00000274481	RP11-345P4.11	processed_pseudogene	other	never	0	0	0	0	0	0	0	0	0	0	0.101092	0.050546	0	0	0
chr1	1598011	1600096	-	ENSG00000228594	FNDC10	protein_coding	coding	constitutive	16.1491	23.6728	19.9109	7.93425	6.32663	7.13044	4.95235	5.24492	5.09863	3.72155	2.89234	3.30694	2.71437	1.66641	2.19039
chr1	1613757	1615795	-	ENSG00000272106	RP11-345P4.9	antisense	lncRNA	constitutive	1.33839	2.19865	1.76852	3.64998	2.24315	2.94657	4.89138	3.7446	4.31799	4.936	4.40808	4.67204	5.24615	4.03332	4.63973
chr1	1615414	1630610	+	ENSG00000197530	MIB2	protein_coding	coding	constitutive	26.9817	32.3511	29.6664	25.5452	26.5802	26.0627	23.8516	14.9735	19.4125	33.1018	34.0677	33.5847	37.9952	24.73	31.3626
chr1	1632094	1635263	+	ENSG00000189409	MMP23B	protein_coding	coding	constitutive	8.9706	12.7697	10.8702	5.71623	5.58718	5.6517	2.05391	1.66795	1.86093	3.39783	3.19399	3.29591	4.13234	2.56472	3.34853
chr1	1635226	1659012	-	ENSG00000248333	CDK11B	protein_coding	coding	constitutive	20.8178	19.9242	20.371	18.2342	18.1261	18.1802	20.9585	17.6878	19.3231	19.9033	16.8556	18.3794	20.6871	17.2094	18.9483
chr1	1659324	1662602	+	ENSG00000272004	RP11-345P4.10	antisense	lncRNA	stage_specific	0.0843992	0.574587	0.329493	0.745111	0.10132	0.423216	0.318268	0.429904	0.374086	7.05444	5.63602	6.34523	1.03226	1.04729	1.03977
chr1	1659528	1692728	-	ENSG00000189339	SLC35E2B	protein_coding	coding	constitutive	12.5912	15.7207	14.156	21.6671	16.8745	19.2708	33.3344	28.8306	31.0825	31.2605	33.2559	32.2582	34.5521	29.1816	31.8668
chr1	1671989	1674397	+	ENSG00000269737	RP11-345P4.6	transcribed_processed_pseudogene	other	pp1_restricted	0.00655774	0.0250011	0.0157794	0.0675961	0.048597	0.0580965	0.0309114	0.0157191	0.0233152	5.5861	8.63022	7.10816	0.103491	0.110222	0.106856
chr1	1699941	1701782	+	ENSG00000215914	MMP23A	unprocessed_pseudogene	other	stage_specific	3.90838	5.4205	4.66444	2.35274	2.15369	2.25321	0.845648	0.490282	0.667965	1.23913	0.773348	1.00624	1.55561	0.788937	1.17227
chr1	1702729	1724324	-	ENSG00000008128	CDK11A	protein_coding	coding	constitutive	16.622	18.1946	17.4083	14.7339	15.7606	15.2472	17.5768	11.7561	14.6664	23.8416	19.0106	21.4261	18.7933	15.8622	17.3278
chr1	1702735	1737688	-	ENSG00000268575	RP1-283E3.8	processed_transcript	lncRNA	stage_specific	0.810639	1.85146	1.33105	2.65871	1.18424	1.92148	3.40324	3.93613	3.66968	2.89197	3.73857	3.31527	3.01629	3.50515	3.26072
chr1	1724837	1745992	-	ENSG00000215790	SLC35E2	protein_coding	coding	constitutive	4.89777	7.95594	6.42685	10.5015	6.99913	8.75032	17.1774	14.3552	15.7663	14.7443	14.9916	14.868	15.2705	13.1521	14.2113
chr1	1724511	1737251	+	ENSG00000227775	RP1-283E3.4	transcribed_processed_pseudogene	other	pp1_restricted	0.074575	0.285595	0.180085	0.426452	0.274596	0.350524	0.445982	0.193145	0.319564	12.3393	16.0386	14.189	1.0773	0.448297	0.762799
chr1	1751231	1780457	-	ENSG00000008130	NADK	protein_coding	coding	constitutive	55.8134	52.2779	54.0457	29.7273	34.4661	32.0967	37.582	35.3231	36.4526	32.3316	29.039	30.6853	50.3636	30.751	40.5573
chr1	1785284	1891117	-	ENSG00000078369	GNB1	protein_coding	coding	constitutive	320.108	279.795	299.952	240.671	265.894	253.282	211.18	188.232	199.706	235.349	174.096	204.722	310.346	191.814	251.08
chr1	1891470	1892658	+	ENSG00000231050	RP1-140A9.1	antisense	lncRNA	never	0.125773	0.199275	0.162524	0.187466	0.192168	0.189817	0.15091	0.0959262	0.123418	0.372015	0.35608	0.364048	0.433066	0.283762	0.358414
chr1	1914826	1917296	+	ENSG00000169885	CALML6	protein_coding	coding	never	0.314032	1.07379	0.693911	0.492648	0.553219	0.522934	0.148575	0.149899	0.149237	0.301734	0.130408	0.216071	0.312958	0.0978653	0.205412
chr1	1917589	1919273	-	ENSG00000178821	TMEM52	protein_coding	coding	stage_specific	7.01475	9.47303	8.24389	4.16401	5.89943	5.03172	3.94014	2.45236	3.19625	1.23678	0.919916	1.07835	0.968828	0.519712	0.74427
chr1	1921950	2003837	-	ENSG00000142609	CFAP74	protein_coding	coding	pp1_restricted	0.0733336	0.122798	0.0980658	0.109146	0.12535	0.117248	0.0714816	0.0120225	0.041752	1.10708	1.949	1.52804	0.202342	0.281363	0.241852
chr1	2013212	2015530	-	ENSG00000233542	RP11-547D24.1	antisense	lncRNA	never	0.0546596	0.203426	0.129043	0.0287237	0.0109364	0.01983	0	0	0	0	0	0	0	0	0
chr1	2019323	2030751	+	ENSG00000187730	GABRD	protein_coding	coding	never	0.388415	0.775666	0.58204	0.104972	0.0888165	0.0968943	0.017437	0.0110838	0.0142604	0	0	0	0.021892	0.0114756	0.0166838
chr1	2049202	2050070	-	ENSG00000226969	RP11-547D24.3	antisense	lncRNA	never	0.431892	0.501322	0.466607	0	0.257517	0.128758	0.135721	0.0422754	0.0889982	0.212908	0	0.106454	0.113584	0	0.056792
chr1	2050469	2185395	+	ENSG00000067606	PRKCZ	protein_coding	coding	constitutive	27.47	25.2521	26.361	38.1574	44.3615	41.2595	28.9145	19.5784	24.2464	29.1026	16.6187	22.8606	32.0946	22.1449	27.1197
chr1	2212522	2220738	+	ENSG00000234396	RP11-181G12.4	lincRNA	lncRNA	never	0	0.29844	0.14922	0.0863863	0.32891	0.207648	0.129147	0	0.0645735	0	0.246128	0.123064	0	0	0
chr1	2141083	2145279	-	ENSG00000271806	RP5-892K4.1	antisense	lncRNA	never	0.00796648	0.00867768	0.00832208	0.030142	0.00956364	0.0198528	0.00375518	0.00477398	0.00426458	0.124159	0.17822	0.15119	0.0251445	0.0172995	0.021222
chr1	2181793	2184389	-	ENSG00000182873	RP11-181G12.2	antisense	lncRNA	stage_specific	1.66362	1.43519	1.5494	0.954783	0.736355	0.845569	1.76574	1.73745	1.7516	3.91554	3.46096	3.68825	2.94696	2.56822	2.75759
chr1	2184460	2212720	-	ENSG00000162585	FAAP20	protein_coding	coding	constitutive	84.5905	61.1842	72.8873	81.7655	98.8645	90.315	51.3973	37.2232	44.3103	62.9393	41.8123	52.3758	54.1884	32.9294	43.5589
chr1	2228694	2310119	+	ENSG00000157933	SKI	protein_coding	coding	constitutive	19.7112	19.1097	19.4105	17.1954	15.2365	16.2159	14.4601	13.6282	14.0442	10.8393	11.9069	11.3731	14.5832	12.6115	13.5974
chr1	2321252	2391707	-	ENSG00000116151	MORN1	protein_coding	coding	constitutive	3.19562	3.5396	3.36761	4.96175	4.18122	4.57149	6.32836	5.57296	5.95066	9.83207	8.47377	9.15292	9.31958	6.29493	7.80725
chr1	2326200	2326693	-	ENSG00000272161	RP4-713A8.1	sense_intronic	lncRNA	pp2_restricted	0.225938	0.246108	0.236023	0.249334	0.0678088	0.158571	0.639006	0.440035	0.53952	0.918892	1.45461	1.18675	1.64911	1.15649	1.4028
chr1	2350413	2352820	-	ENSG00000269896	RP4-740C4.5	transcribed_processed_pseudogene	other	constitutive	5.42275	4.33995	4.88135	2.69406	5.67691	4.18548	8.5926	7.73581	8.16421	16.9717	12.2	14.5859	18.7225	9.75135	14.2369
chr1	2363060	2363628	-	ENSG00000272420	RP4-740C4.7	sense_intronic	lncRNA	never	0.222914	0.218533	0.220723	0.730963	0.107042	0.419002	0.588424	0.694632	0.641528	0.659341	1.38842	1.02388	0.316612	0.857487	0.58705
chr1	2391774	2405444	+	ENSG00000157916	RER1	protein_coding	coding	constitutive	63.4927	40.5698	52.0312	57.6506	97.9397	77.7952	51.8991	36.3229	44.111	57.471	30.8566	44.1638	58.52	39.536	49.028
chr1	2403963	2413797	-	ENSG00000157911	PEX10	protein_coding	coding	constitutive	24.7985	18.728	21.7632	14.0723	17.4082	15.7402	13.7241	10.935	12.3295	12.7485	8.97312	10.8608	15.0678	9.44343	12.2556
chr1	2425979	2505530	+	ENSG00000149527	PLCH2	protein_coding	coding	never	0.00444627	0.0496856	0.0270659	0.019636	0.115972	0.067804	0.0140397	0.0264172	0.0202284	0.129006	0.158568	0.143787	0.0624091	0.0418973	0.0521532
chr1	2492299	2493258	-	ENSG00000224387	RP3-395M20.2	antisense	lncRNA	never	0	0	0	0.082381	0.0784151	0.080398	0.0615797	0	0.0307899	0.193204	0.547672	0.370438	0.463877	0.12158	0.292729
chr1	2493436	2494479	-	ENSG00000229393	RP3-395M20.3	antisense	lncRNA	never	0	0.028624	0.014312	0	0	0	0.049547	0.0314947	0.0405208	0.310903	0.283279	0.297091	0.456176	0.326078	0.391127
chr1	2508532	2526628	-	ENSG00000157881	PANK4	protein_coding	coding	constitutive	10.1344	11.5312	10.8328	10.4889	9.29629	9.8926	10.7635	9.44743	10.1055	11.1008	8.38615	9.74348	14.9584	10.5061	12.7323
chr1	2528744	2530245	-	ENSG00000197921	HES5	protein_coding	coding	never	0.0290125	0.0237019	0.0263572	0.00914764	0.0174145	0.0132811	0	0	0	0.0214534	0	0.0107267	0.366287	0.342008	0.354148
chr1	2546464	2547460	+	ENSG00000272449	RP3-395M20.12	lincRNA	lncRNA	es_restricted	1.0931	1.17966	1.13638	0.970136	0.777627	0.873881	0.610673	0.315393	0.463033	0.38918	0.19397	0.291575	1.24588	0.703317	0.974599
chr1	2549919	2557031	-	ENSG00000238164	RP3-395M20.8	antisense	lncRNA	never	0	0	0	0	0.0533711	0.0266855	0.0105582	0	0.0052791	0.0380142	0.0254998	0.031757	0	0	0
chr1	2555638	2565382	+	ENSG00000157873	TNFRSF14	protein_coding	coding	never	0.158647	0.244335	0.201491	0.250871	0.213649	0.23226	0.052142	0.0154488	0.0337954	0.052292	0.0474024	0.0498472	0.0987113	0.136696	0.117704
chr1	2566409	2569888	+	ENSG00000225931	RP3-395M20.7	TEC	lncRNA	never	0	0	0	0	0	0	0	0	0	0	0.0131396	0.0065698	0	0.00907488	0.00453744
chr1	2581559	2584533	+	ENSG00000228037	RP3-395M20.9	lincRNA	lncRNA	never	0.0766721	0	0.0383361	0	0	0	0	0	0	0.113391	0.114796	0.114094	0	0.0237852	0.0118926
chr1	2586490	2591469	+	ENSG00000157870	FAM213B	protein_coding	coding	constitutive	18.7366	16.823	17.7798	12.454	15.1054	13.7797	12.2559	9.40243	10.8292	11.0395	9.16594	10.1027	11.8107	7.67657	9.74363
chr1	2590638	2632990	-	ENSG00000142606	MMEL1	protein_coding	coding	never	0.561568	1.89932	1.23044	0.493654	0.381265	0.43746	0.237953	0.0407619	0.139357	0.0916807	0.0561849	0.0739328	0.19137	0.203347	0.197358
chr1	2632567	2636620	+	ENSG00000237058	RP13-436F16.1	antisense	lncRNA	pp1_restricted	0.393591	0.964638	0.679114	0	0	0	0.092764	0	0.046382	1.20623	1.64452	1.42538	0.77643	0.122099	0.449265
chr1	2635975	2801717	-	ENSG00000215912	TTC34	protein_coding	coding	never	0.10897	0.279322	0.194146	0.244302	0.27019	0.257246	0.363491	0.229948	0.29672	0.449385	0.383486	0.416436	0.315886	0.330788	0.323337
chr1	2773602	2776473	+	ENSG00000283259	ABC14-1188822O7.1	antisense	lncRNA	never	0	0.00127764	0.00063882	0.00271204	0	0.00135602	0.00221154	0.00257724	0.00239439	0.0740118	0.129653	0.101832	0.00555314	0.0278962	0.0167247
chr1	2811849	2812692	-	ENSG00000233234	RP11-740P5.2	lincRNA	lncRNA	never	0	0	0	0	0	0	0	0	0	0	0	0	0	0	0
chr1	2814431	2814998	-	ENSG00000231630	RP11-740P5.3	lincRNA	lncRNA	never	0	0	0	0	0	0	0	0	0	0	0	0	0	0	0
chr1	3021482	3022903	+	ENSG00000169717	ACTRT2	protein_coding	coding	never	0.0131263	0	0.00656315	0	0	0	0.358869	0.29891	0.32889	0.291191	0.377341	0.334266	0.21751	0.105873	0.161691
chr1	3059614	3068437	-	ENSG00000177133	LINC00982	antisense	lncRNA	pp2_restricted	0.00786579	0	0.00393289	0.00248009	0.0421523	0.0223162	0.360565	0.0769126	0.218739	0.793736	0.613711	0.703723	10.9481	12.7108	11.8294
chr1	3069167	3438621	+	ENSG00000142611	PRDM16	protein_coding	coding	pp2_restricted	0.045101	0.288285	0.166693	0.465765	0.409961	0.437863	0.375135	0.408546	0.39184	0.828773	0.92882	0.878796	12.7318	8.47309	10.6024
chr1	3127974	3128035	+	ENSG00000283572	MIR4251	miRNA	other	never	0	0	0	0	0	0	0	0	0	0	0	0	0	0	0
chr1	3132926	3133709	-	ENSG00000226286	RP1-163G9.2	antisense	lncRNA	never	0	0	0	0	0	0	0.0582244	0.0370105	0.0476174	0	0.0739759	0.0369879	0.0487335	0	0.0243667
chr1	3205987	3208664	+	ENSG00000279839	RP11-193J6.1	TEC	lncRNA	never	0	0	0	0	0	0	0.0182078	0.00385795	0.0110329	0.0285632	0.0308448	0.029704	0.218438	0.435379	0.326908
chr1	3306635	3310096	-	ENSG00000272235	RP11-22L13.1	lincRNA	lncRNA	never	0	0	0	0	0	0	0	0	0	0.0361177	0.0204765	0.0282971	0.0539576	0.0515175	0.0527376
chr1	3454425	3481113	+	ENSG00000130762	ARHGEF16	protein_coding	coding	constitutive	9.50508	8.22203	8.86355	18.2322	21.1143	19.6732	13.3304	8.55919	10.9448	28.3315	20.9228	24.6272	25.2203	16.92	21.0702
chr1	3487245	3487627	+	ENSG00000272088	RP11-168F9.2	lincRNA	lncRNA	stage_specific	0.186518	0.203169	0.194844	0.70571	0.335868	0.520789	1.14295	0.838293	0.990622	2.75844	4.13306	3.44575	3.23788	3.18238	3.21013
chr1	3489919	3611495	-	ENSG00000162591	MEGF6	protein_coding	coding	constitutive	1.97119	4.41575	3.19347	11.4966	8.82303	10.1598	12.5815	8.25001	10.4158	23.0972	23.0235	23.0603	22.2142	12.3764	17.2953
chr1	3560694	3560790	-	ENSG00000207776	MIR551A	miRNA	other	never	0	0	0	0	0	0	0	0	0	0	0	0	0	0	0
chr1	3623189	3624743	-	ENSG00000238260	RP11-46F15.2	antisense	lncRNA	never	0.0387101	0.105415	0.0720626	0.414981	0.46471	0.439846	0.328444	0.324763	0.326603	0.629738	0.231833	0.430785	0.335997	0.288207	0.312102
chr1	3625001	3630127	+	ENSG00000158109	TPRG1L	protein_coding	coding	constitutive	13.2894	12.6663	12.9779	25.4363	29.2167	27.3265	16.904	14.1137	15.5089	25.4432	25.079	25.2611	19.9205	16.4833	18.2019
chr1	3630766	3652761	-	ENSG00000116213	WRAP73	protein_coding	coding	constitutive	11.1232	13.8962	12.5097	11.6693	13.5619	12.6156	10.6345	8.24661	9.44055	12.695	9.74808	11.2215	13.3632	9.34768	11.3554
chr1	3652519	3736201	+	ENSG00000078900	TP73	protein_coding	coding	stage_specific	0.490446	2.18914	1.33979	1.63524	0.923061	1.27915	3.20756	1.80463	2.5061	2.13381	1.1792	1.6565	1.51401	0.584612	1.04931
chr1	3736942	3737103	-	ENSG00000276189	TP73-AS1	unitary_pseudogene	other	never	0	1.07875	0.539375	0	0	0	0	0	0	1.6033	4.97e-192	0.80165	0	0	0
chr1	3746459	3771645	+	ENSG00000162592	CCDC27	protein_coding	coding	never	0.0577534	0.0700318	0.0638926	0.0283262	0.0231107	0.0257185	0.0665461	0.0230728	0.0448095	0.0358496	0.0629091	0.0493794	0.0629118	0.0278697	0.0453908
chr1	3735600	3747336	-	ENSG00000227372	TP73-AS1	unitary_pseudogene	other	constitutive	14.5245	17.4184	15.9715	12.4179	11.3919	11.9049	17.8181	14.3133	16.0657	14.2829	13.393	13.8379	19.5385	11.2847	15.4116
chr1	3658937	3668772	-	ENSG00000227589	RP5-1092A11.5	antisense	lncRNA	never	0	0	0	0	0	0	0	0	0	0	0	0	0.0231053	0	0.0115526
chr1	3712199	3714298	-	ENSG00000235131	RP5-1092A11.2	antisense	lncRNA	never	0	0	0	0	0	0	0	0	0	0.167934	0.204018	0.185976	0	0	0
chr1	3772787	3775982	+	ENSG00000235169	SMIM1	protein_coding	coding	constitutive	4.85309	4.27038	4.56173	6.13279	8.05539	7.09409	5.01136	3.41893	4.21514	9.20639	4.20084	6.70362	5.01783	3.36992	4.19388
chr1	3778557	3796504	-	ENSG00000130764	LRRC47	protein_coding	coding	constitutive	39.463	45.5503	42.5067	22.4936	20.8063	21.65	26.0096	22.9444	24.477	20.4029	22.8724	21.6377	27.4188	23.3601	25.3895
chr1	3785007	3785538	+	ENSG00000272153	RP1-286D6.5	antisense	lncRNA	pp1_restricted	0.0497548	0.216786	0.13327	0.219628	0.418109	0.318868	0.234531	0.238528	0.23653	3.33393	3.61371	3.47382	0.628163	0.833483	0.730823
chr1	3782814	3783111	+	ENSG00000266075	RN7SL574P	misc_RNA	other	pp2_restricted	0	0.0967149	0.0483575	0.33594	0.213178	0.274559	0.837049	0.744901	0.790975	0.787862	2.33969	1.56378	2.38206	1.10175	1.74191
chr1	3812080	3857214	-	ENSG00000116198	CEP104	protein_coding	coding	constitutive	24.4209	27.7499	26.0854	19.1554	19.0947	19.1251	17.3691	20.6858	19.0275	22.5781	27.8309	25.2045	22.6878	24.1415	23.4147
chr1	3857266	3885429	+	ENSG00000169598	DFFB	protein_coding	coding	constitutive	3.76582	3.38184	3.57383	2.3573	3.49513	2.92622	2.80053	2.7368	2.76866	4.04206	4.02127	4.03167	3.36657	2.75846	3.06251
chr1	3889124	3900293	-	ENSG00000198912	C1orf174	protein_coding	coding	constitutive	14.017	13.9707	13.9939	13.9692	16.876	15.4226	13.29	12.5365	12.9132	14.1388	12.3582	13.2485	16.1945	13.0675	14.631
chr1	3900371	3917225	+	ENSG00000236423	LINC01134	lincRNA	lncRNA	never	0.416275	0.568238	0.492256	0.205697	0.184466	0.195081	0.267934	0.38162	0.324777	0.396466	0.828651	0.612559	0.788702	1.02237	0.905536
chr1	3940564	3955262	+	ENSG00000233304	LINC01346	lincRNA	lncRNA	never	0	0	0	0	0	0	0	0	0	0.00774565	0.0273851	0.0175654	0	0	0
chr1	3944546	3948980	-	ENSG00000226374	RP13-614K11.2	lincRNA	lncRNA	never	0.0218897	0	0.0109449	0	0	0	0	0	0	0	0	0	0	0.0135812	0.0067906
chr1	4175527	4175899	-	ENSG00000229280	EEF1DP6	processed_pseudogene	other	never	0	0	0	0	0	0	0	0	0	0	0	0	0	0	0
chr1	4412026	4424689	+	ENSG00000235054	RP5-1166F10.1	lincRNA	lncRNA	never	0	0	0	0	0	0	0	0	0	0	0	0	0	0	0
chr1	4551734	4552145	-	ENSG00000227169	RP1-37J18.1	lincRNA	lncRNA	never	0	0	0	0	0	0	0	0	0	0	0	0	0	0	0
chr1	4571480	4594009	+	ENSG00000232596	RP1-37J18.2	lincRNA	lncRNA	never	0	0	0	0	0	0	0	0	0	0	0	0	0	0	0
chr1	4654731	4792534	+	ENSG00000196581	AJAP1	protein_coding	coding	de_restricted	0.59678	1.04332	0.82005	7.55651	5.69966	6.62808	0.418672	0.340234	0.379453	0.102072	0.0986608	0.100366	0.158956	0.12644	0.142698
chr1	5086458	5090899	-	ENSG00000231510	RP11-542C10.1	lincRNA	lncRNA	never	0	0.0364763	0.0182382	0.168934	0.0804008	0.124667	0	0.0401344	0.0200672	0	0	0	0	0	0
chr1	5492977	5494674	+	ENSG00000260972	RP1-58B11.1	lincRNA	lncRNA	never	0	0	0	0	0	0	0	0	0	0	0	0	0	0.00663037	0.00331519
chr1	5554746	5554881	+	ENSG00000283356	RP3-491M17.1	unprocessed_pseudogene	other	never	0	0	0	0	0	0	0	0	0	0	0	0	0	0	0
chr1	5561708	5668295	-	ENSG00000236948	RP11-154H17.1	lincRNA	lncRNA	never	0	0	0	0	0	0	0.0235618	0.0299542	0.026758	0	0	0	0	0.0310129	0.0155064
chr1	5564070	5564143	+	ENSG00000264341	MIR4417	miRNA	other	never	0	0	0	0	0	0	0	0	0	0	0	0	0	0	0
chr1	5862671	5862741	-	ENSG00000264101	MIR4689	miRNA	other	never	0	0	0	0	0	0	0	0	0	0	0	0	0	0	0
chr1	5862810	5992473	-	ENSG00000131697	NPHP4	protein_coding	coding	constitutive	2.06065	2.87529	2.46797	4.45918	3.51816	3.98867	5.47622	4.37785	4.92704	7.45242	8.26583	7.85912	8.70869	6.07928	7.39398
chr1	5991465	6101193	+	ENSG00000069424	KCNAB2	protein_coding	coding	constitutive	1.24501	2.27375	1.75938	2.47812	2.32767	2.4029	2.10622	1.48268	1.79445	2.0091	1.67914	1.84412	1.87228	1.21195	1.54211
chr1	6101792	6180123	-	ENSG00000116254	CHD5	protein_coding	coding	never	0.466724	1.1534	0.810062	0.0509157	0.0490461	0.0499809	0.0650606	0.134693	0.0998768	0.107678	0.126145	0.116912	0.0884088	0.12818	0.108294
chr1	6181268	6209389	-	ENSG00000116251	RPL22	protein_coding	coding	constitutive	424.686	339.779	382.233	344.396	437.986	391.191	424.143	448.779	436.461	389.588	193.897	291.743	185.113	185.98	185.547
chr1	6204839	6205780	-	ENSG00000226944	RP1-120G22.11	antisense	lncRNA	never	0.190955	0.520006	0.35548	0.120416	0.114619	0.117517	0.0900111	0.114431	0.102221	0.564812	0.400266	0.482539	0.376694	0.118476	0.247585
chr1	6221192	6235972	-	ENSG00000116237	ICMT	protein_coding	coding	constitutive	57.6885	47.1612	52.4248	27.7764	40.2279	34.0022	29.0671	28.208	28.6376	28.5127	23.4551	25.9839	42.3565	36.2326	39.2946
chr1	6205474	6221299	+	ENSG00000158286	RNF207	protein_coding	coding	stage_specific	0.647108	5.22435	2.93573	3.86789	1.02472	2.44631	1.04876	0.596709	0.822735	26.3545	19.4418	22.8982	6.09074	4.21907	5.15491
chr1	6236239	6239444	+	ENSG00000225077	LINC00337	lincRNA	lncRNA	stage_specific	5.72266	6.28974	6.0062	2.44018	2.29933	2.36976	0.205285	0.168469	0.186877	0.680889	0.58804	0.634464	0.520193	0.381899	0.451046
chr1	6244191	6245578	+	ENSG00000173673	HES3	protein_coding	coding	es_restricted	20.1903	27.4999	23.8451	0.0412707	0.0392839	0.0402773	0	0	0	0	0	0	0	0	0
chr1	6247345	6260975	-	ENSG00000158292	GPR153	protein_coding	coding	stage_specific	3.67822	7.85982	5.76902	4.65061	2.865	3.7578	1.24865	0.990294	1.11947	3.46277	3.41849	3.44063	6.96853	5.24986	6.10919
chr1	6264268	6394391	-	ENSG00000097021	ACOT7	protein_coding	coding	constitutive	129.098	87.6304	108.364	28.1261	53.1452	40.6356	33.5322	25.6635	29.5979	21.3105	10.821	16.0658	46.6992	31.9992	39.3492
chr1	6393554	6394391	+	ENSG00000271746	RP1-202O8.3	antisense	lncRNA	never	0.126963	0.179787	0.153375	0.144114	0.0304835	0.0872987	0.167572	0.0152168	0.0913944	0.0491143	0.0747856	0.0619499	0.12022	0.0630183	0.0916191
chr1	6412417	6424670	-	ENSG00000069812	HES2	protein_coding	coding	never	0.261757	0.378402	0.32008	0.586129	0.126284	0.356206	0.00369399	0.027776	0.015735	0.0580219	0.0180461	0.038034	0.17503	0.331021	0.253026
chr1	6424787	6461370	+	ENSG00000187017	ESPN	protein_coding	coding	constitutive	13.2108	22.6321	17.9215	9.34047	10.2579	9.79918	7.48299	6.93599	7.20949	16.3696	14.66	15.5148	17.7758	10.9523	14.3641
chr1	6443033	6447006	-	ENSG00000231868	RP1-202O8.2	antisense	lncRNA	never	0	0	0	0	0	0	0	0.0680474	0.0340237	0	0.136012	0.068006	0	0	0
chr1	6461150	6466195	-	ENSG00000215788	TNFRSF25	protein_coding	coding	constitutive	4.71241	8.20553	6.45897	9.62927	6.43578	8.03252	15.5957	9.31756	12.4566	18.9124	20.3355	19.624	18.3955	13.4024	15.8989
chr1	6466091	6520061	-	ENSG00000171680	PLEKHG5	protein_coding	coding	constitutive	7.87615	13.3197	10.5979	9.44126	8.82781	9.13453	18.093	10.0289	14.061	20.34	17.0112	18.6756	18.0106	10.7399	14.3752
chr1	6429833	6429896	-	ENSG00000265392	MIR4252	miRNA	other	never	0	0	0	0	0	0	0	0	0	0	0	0	0	0	0
chr1	6521346	6554535	-	ENSG00000162408	NOL9	protein_coding	coding	constitutive	6.86224	7.10855	6.98539	6.04097	5.25736	5.64916	7.27538	8.07875	7.67706	5.76208	8.07216	6.91712	7.08765	8.63903	7.86334
chr1	6540853	6540964	+	ENSG00000253022	RNU6-731P	snRNA	other	never	0	0	0	0	0	0	0	0	0	0	0	0	0	0	0
chr1	6547904	6548619	+	ENSG00000229519	RP11-58A11.2	processed_pseudogene	other	never	0	0	0	0	0	0	0	0	0	0.869134	2.06148	1.46531	0	0	0
chr1	6555180	6579757	+	ENSG00000173662	TAS1R1	protein_coding	coding	never	0.0596562	0.0885859	0.074121	0.0806515	0.0360842	0.0583678	0.0642253	0.0477456	0.0559854	0.132661	0.028912	0.0807865	0.00934564	0.00593488	0.00764026
chr1	6580000	6589280	+	ENSG00000204859	ZBTB48	protein_coding	coding	constitutive	18.0051	15.9747	16.9899	16.7947	19.0039	17.8993	19.3941	17.1602	18.2771	33.9354	29.7128	31.8241	35.992	23.3404	29.6662
chr1	6590723	6614607	-	ENSG00000162413	KLHL21	protein_coding	coding	constitutive	9.0765	6.02683	7.55166	4.19326	4.21175	4.20251	5.45662	4.44434	4.95048	7.31773	5.9353	6.62652	9.16538	5.59779	7.38159
chr1	6613684	6624033	+	ENSG00000116273	PHF13	protein_coding	coding	constitutive	9.43281	8.99928	9.21604	12.8515	9.61188	11.2317	12.2566	10.573	11.4148	8.41281	8.52456	8.46869	11.2063	9.14641	10.1764
chr1	6624865	6635586	+	ENSG00000041988	THAP3	protein_coding	coding	constitutive	8.06045	7.09969	7.58007	6.84244	10.8698	8.85612	9.82897	8.56117	9.19507	15.5671	9.95169	12.7594	13.9364	10.2904	12.1134
chr1	6634167	6701924	-	ENSG00000007923	DNAJC11	protein_coding	coding	constitutive	41.9931	41.6121	41.8026	21.9547	25.3225	23.6386	38.5164	26.9522	32.7343	24.7275	24.5933	24.6604	27.0355	24.0909	25.5632
chr1	6724636	6730012	+	ENSG00000228750	RP11-242F24.1	lincRNA	lncRNA	never	0	0	0	0.00678927	0	0.00339464	0	0	0	0	0	0	0	0	0
chr1	6783891	6784843	-	ENSG00000237436	RP11-312B8.1	antisense	lncRNA	never	0.703659	0.766478	0.735069	0.838153	0.469296	0.653725	0.663372	0.749642	0.706507	1.04065	0.515065	0.777857	0.802012	0.630611	0.716311
chr1	6785323	7769706	+	ENSG00000171735	CAMTA1	protein_coding	coding	constitutive	54.6627	43.3781	49.0204	50.3278	55.0886	52.7082	54.3352	48.1627	51.249	61.5519	48.188	54.87	44.7228	52.8022	48.7625
chr1	6834332	6834618	-	ENSG00000227950	RP11-312B8.2	processed_pseudogene	other	never	0	0	0	0	0	0	0	0	0	0.293954	0.357115	0.325535	0	0	0
chr1	7008375	7014279	-	ENSG00000237365	RP11-334N17.1	antisense	lncRNA	never	0	0	0	0	0	0	0	0	0	0	0.0689624	0.0344812	0	0	0
chr1	7219359	7219524	+	ENSG00000207056	RNU1-8P	snRNA	other	never	0	0	0	0	0	0	0	0	0	0	0	0	0	0	0
chr1	7368941	7370270	+	ENSG00000237402	CAMTA1-IT1	sense_intronic	lncRNA	never	0.51721	0.112677	0.314943	0.652305	0.620903	0.636604	0.390078	0.123977	0.257028	0.152982	0.309753	0.231368	0.163247	0.449255	0.306251
chr1	7382486	7389754	-	ENSG00000237728	RP3-453P22.2	antisense	lncRNA	never	0	0	0	0	0	0	0	0	0	0.131053	0	0.0655265	0	0	0
chr1	7441095	7441554	-	ENSG00000225126	RP4-549F15.1	antisense	lncRNA	never	0	0	0	0	0	0	0	0	0	0	0	0	0	0	0
chr1	7693123	7694844	-	ENSG00000270171	RP11-338N10.1	lincRNA	lncRNA	never	0.0315499	0.194743	0.113146	0.172427	0.0757504	0.124089	0.0694016	0.0819283	0.0756649	0.248851	0.390497	0.319674	0.107879	0.123973	0.115926
chr1	7698302	7698872	-	ENSG00000270035	RP11-338N10.2	lincRNA	lncRNA	never	0.266002	0.91754	0.591771	1.06236	0.585442	0.823901	0.167182	0.185971	0.176576	0.852354	0.690331	0.771343	0.454773	0.412595	0.433684
chr1	7700703	7700970	-	ENSG00000269978	RP11-338N10.3	lincRNA	lncRNA	stage_specific	1.72821	4.16837	2.94829	2.95805	0.889151	1.9236	0.465502	0.887693	0.676597	1.46049	2.66146	2.06098	0	1.22542	0.61271
chr1	7771268	7781432	+	ENSG00000049245	VAMP3	protein_coding	coding	constitutive	16.3247	21.4838	18.9043	24.1019	22.7434	23.4227	20.3727	23.3165	21.8446	32.9083	30.8251	31.8667	32.0187	34.0279	33.0233
chr1	7776382	7776775	+	ENSG00000269925	RP3-467L1.6	sense_intronic	lncRNA	stage_specific	1.13935	0.572801	0.856075	1.60276	0.526068	1.06441	1.48724	2.3109	1.89907	1.16654	3.14931	2.15793	1.93638	3.96951	2.95295
chr1	7784319	7845177	+	ENSG00000049246	PER3	protein_coding	coding	stage_specific	2.23851	3.98917	3.11384	1.72121	1.0414	1.38131	1.07064	0.869256	0.969948	0.465568	0.521781	0.493675	0.456432	0.562169	0.509301
chr1	7810241	7827342	-	ENSG00000236266	RP3-467L1.4	antisense	lncRNA	never	0.0256803	0.153851	0.0897657	0.0809701	0	0.0404851	0.04842	0	0.02421	0.0578672	0	0.0289336	0	0	0
chr1	7843082	7853512	-	ENSG00000049247	UTS2	protein_coding	coding	never	0.0114252	0.148076	0.0797506	0.497322	0.0548633	0.276093	0	0.16836	0.08418	0.112853	0.054786	0.0838195	0	0	0
chr1	7915893	7943165	-	ENSG00000049249	TNFRSF9	protein_coding	coding	stage_specific	0	0.0232368	0.0116184	0.00173795	0.0111345	0.00643623	0	0.0049547	0.00247735	3.36535	3.38187	3.37361	3.41638	2.71467	3.06553
chr1	7942371	7942726	+	ENSG00000270330	RP5-892F13.2	processed_pseudogene	other	never	0	0	0	0	0	0	0	0	0	0	0	0	0	0	0
chr1	7954290	7985505	+	ENSG00000116288	PARK7	protein_coding	coding	constitutive	246.841	121.288	184.065	124.144	234.473	179.309	126.331	99.7113	113.021	162.1	91.3672	126.734	131.504	116.643	124.073
chr1	7982880	7982983	-	ENSG00000200344	Y_RNA	misc_RNA	other	never	0	0	0	0	0	0	0	0	0	0	39.7095	19.8547	0	0	0
chr1	8004403	8026308	-	ENSG00000116285	ERRFI1	protein_coding	coding	constitutive	10.3514	13.3427	11.847	22.5624	13.1682	17.8653	37.1425	38.4022	37.7724	71.3789	85.2123	78.2956	36.5063	41.8447	39.1755
chr1	8026737	8122702	+	ENSG00000238290	RP11-431K24.1	lincRNA	lncRNA	never	0.0173248	0.0707679	0.0440463	0.0928626	0.0415963	0.0672294	0.318491	0.176494	0.247493	0.42276	0.280144	0.351452	0.246069	0.118238	0.182153
chr1	8057244	8058463	-	ENSG00000232848	CTA-215D11.4	processed_pseudogene	other	never	0	0.0147001	0.00735005	0.00425508	0	0.00212754	0	0.0404359	0.0202179	0	0.0107764	0.0053882	0.026622	0.00418651	0.0154043
chr1	8189823	8192770	+	ENSG00000229305	RP11-431K24.2	processed_pseudogene	other	never	0	0	0	0	0	0	0	0	0	0	0	0	0	0	0
chr1	8202428	8215210	+	ENSG00000227634	RP11-431K24.3	lincRNA	lncRNA	never	0	0	0	0	0	0	0	0	0	0	0	0	0	0	0
chr1	8206433	8206597	-	ENSG00000200975	RNU1-7P	snRNA	other	never	0	0	0	0	0	0	0	0	0	0	0	0	0	0	0
chr1	8218189	8220529	-	ENSG00000233645	RP11-431K24.4	lincRNA	lncRNA	never	0	0	0	0	0	0	0	0	0	0	0	0	0	0	0
chr1	8292156	8292263	-	ENSG00000251977	RNU6-991P	snRNA	other	never	0	0	0	0	0	0	0	0	0	0	0	0	0	0	0
chr1	8317825	8344167	+	ENSG00000162426	SLC45A1	protein_coding	coding	never	0.643722	1.07507	0.859396	0.0731457	0.0696239	0.0713848	0.243376	0.294416	0.268896	0.457619	0.500918	0.479268	0.633987	0.350532	0.49226
chr1	8328066	8328179	-	ENSG00000252254	Y_RNA	misc_RNA	other	never	0	0	0	0	0	0	0	0	0	0	0	0	0	0	0
chr1	8352396	8817643	-	ENSG00000142599	RERE	protein_coding	coding	constitutive	56.95	62.2496	59.5998	61.6077	52.2506	56.9291	116.644	114.406	115.525	99.329	122.661	110.995	154.322	149.726	152.024
chr1	8424644	8434838	+	ENSG00000232912	RP5-1115A15.1	antisense	lncRNA	never	0	0.0380826	0.0190413	0.203866	0.125356	0.164611	0	0	0	0.103293	0.264904	0.184098	0.0551742	0	0.0275871
chr1	8511794	8511919	-	ENSG00000221083	SNORA77	snoRNA	other	pp1_restricted	9.28162	0	4.64081	0	0	0	17.5004	0	8.7502	13.7267	22.2348	17.9808	0	5.75867	2.87934
chr1	8512652	8513021	+	ENSG00000270282	RP5-1115A15.2	processed_pseudogene	other	never	0	0	0	0	0	0	0	0	0	0	0.543638	0.271819	0	0	0
chr1	8750429	8751087	+	ENSG00000234619	RPL7P11	processed_pseudogene	other	never	0.0474469	0.121131	0.084289	0.0748001	0.0284797	0.0516399	0.142578	0.106624	0.124601	0.438561	0.612712	0.525636	0.0748782	0.0805861	0.0777321
chr1	8786210	8786913	-	ENSG00000224315	RPL7P7	processed_pseudogene	other	never	0.129294	0.19365	0.161472	0.203832	0.0776076	0.14072	0.243782	0.564961	0.404371	0.0478035	0.816275	0.432039	0.178539	0.890428	0.534484
chr1	8796570	8796673	-	ENSG00000222511	Y_RNA	misc_RNA	other	never	0	0	0	0	0	0	0	39.7337	19.8668	0	0	0	0	0	0
chr1	8798474	8799506	+	ENSG00000226545	RP4-633I8.3	unprocessed_pseudogene	other	never	0	0	0	0	0	0	0	0	0	0	1.3579	0.67895	0.0616932	0	0.0308466
chr1	8805859	8807051	-	ENSG00000228423	RP4-633I8.4	lincRNA	lncRNA	never	0.111996	0.548977	0.330487	0.494375	0.13445	0.314412	0.211168	1.54364	0.877404	0.828164	1.74392	1.28604	0.26512	2.57101	1.41806
chr1	8831006	8831375	+	ENSG00000229716	RPL23AP19	processed_pseudogene	other	never	0	0	0	0	0	0	0	0	0	0	0.0604042	0.0302021	0.0795857	0	0.0397928
chr1	8861001	8879249	-	ENSG00000074800	ENO1	protein_coding	coding	constitutive	912.478	732.465	822.471	580.353	894.488	737.42	592.745	508.906	550.826	268.113	135.521	201.817	308.509	210.202	259.356
chr1	8878834	8879894	+	ENSG00000230679	ENO1-AS1	antisense	lncRNA	never	0.650517	0.177148	0.413832	0.49226	0.546656	0.519458	0.551945	0.467793	0.509869	0	0.396421	0.198211	0.256653	0.201803	0.229228
chr1	8866501	8866590	-	ENSG00000274258	MIR6728	miRNA	other	never	0	0	0	0	0	0	0	0	0	0	0	0	0	0	0
chr1	8875787	8878007	-	ENSG00000236269	ENO1-IT1	sense_intronic	lncRNA	never	0.119328	0.178724	0.149026	0.300994	0.071626	0.18631	0.0281241	0.143017	0.0855705	0.132357	0.116131	0.124244	0.0706191	0.148072	0.109346
chr1	8883426	8883533	-	ENSG00000201725	RNU6-304P	snRNA	other	never	0	0	0	0	0	0	0	0	0	0	0	0	0	0	0
chr1	8893408	8894151	+	ENSG00000238249	HMGN2P17	processed_pseudogene	other	never	0.0448324	0.116661	0.0807467	0.0879553	0.0119601	0.0499577	0.262986	0.679117	0.471052	0	0.292365	0.146182	0.314454	0.281248	0.297851
chr1	8907392	8907744	-	ENSG00000232208	RP3-477M7.5	processed_pseudogene	other	never	0	0	0	0.142225	0	0.0711125	0	0	0	0	0	0	0	0	0
chr1	8909741	8909904	+	ENSG00000232663	RP3-477M7.6	processed_pseudogene	other	never	0	0	0	0	0	0	0	0	0	0	0	0	0	0	0
chr1	8945866	8975092	+	ENSG00000131686	CA6	protein_coding	coding	never	0	0	0	0	0.0514944	0.0257472	0	0	0	0	0	0	0	0.026864	0.013432
chr1	8979575	8979874	-	ENSG00000265141	RN7SL451P	misc_RNA	other	never	0	0	0	0	0	0	0	0	0	0	0	0	0	0	0
chr1	9003299	9026345	-	ENSG00000197241	SLC2A7	protein_coding	coding	never	0	0.0260534	0.0130267	0.0226242	0	0.0113121	0.0225487	0.0143331	0.0184409	0	0	0	0.0471829	0.0222596	0.0347213
chr1	9035106	9088478	-	ENSG00000142583	SLC2A5	protein_coding	coding	never	0.0333623	0.0362614	0.0348118	0.0215559	0.0410363	0.0312961	0	0.00481142	0.00240571	0	0.000601061	0.000300531	0	0.00959967	0.00479983
chr1	9082695	9082879	+	ENSG00000252404	SCARNA16	scaRNA	other	never	0	0	0	0	0	0	0	0	0	0	0	0	0	0	0
chr1	9100304	9129170	-	ENSG00000180758	GPR157	protein_coding	coding	constitutive	1.301	3.30626	2.30363	5.07896	4.7014	4.89018	3.86536	4.38984	4.1276	2.87483	1.59128	2.23305	2.19719	1.79148	1.99433
chr1	9148010	9196983	-	ENSG00000228526	MIR34A	lincRNA	lncRNA	es_restricted	13.519	4.5259	9.02245	0.739863	62.6402	31.69	1.27578	0.745741	1.01076	0.414374	12.8855	6.64994	0.609034	0.620954	0.614994
chr1	9182003	9196284	+	ENSG00000234546	RP3-510D11.2	lincRNA	lncRNA	never	0.321126	1.24022	0.780673	0.270356	0.139433	0.204895	0.646416	0.472065	0.559241	0.424664	0.194421	0.309542	0.297225	0.386142	0.341683
chr1	9197142	9198906	-	ENSG00000281937	RP3-510D11.4	lincRNA	lncRNA	never	0	0	0	0	0.0122753	0.00613765	0.0096398	0	0.0048199	0.0302445	0.0428668	0.0365557	0	0	0
chr1	9234774	9271337	+	ENSG00000049239	H6PD	protein_coding	coding	constitutive	1.90203	3.7987	2.85037	6.86109	5.09228	5.97668	7.31087	6.6015	6.95618	8.05013	8.45278	8.25145	10.3654	6.99785	8.68163
chr1	9292879	9369532	+	ENSG00000171621	SPSB1	protein_coding	coding	constitutive	1.40556	2.14357	1.77456	10.0281	13.011	11.5196	4.20923	3.53312	3.87118	3.10914	2.53249	2.82082	5.20511	4.19254	4.69883
chr1	9437668	9437778	-	ENSG00000252956	RNA5SP40	rRNA	other	never	0	0	0	0	0	0	0	0	0	0	0	0	0	0	0
chr1	9501091	9503471	-	ENSG00000235263	RP13-392I16.1	lincRNA	lncRNA	never	0	0	0	0	0	0	0	0	0	0	0	0	0	0	0
chr1	9539481	9585179	+	ENSG00000171612	SLC25A33	protein_coding	coding	constitutive	3.7342	3.22945	3.48183	2.80404	3.96238	3.38321	3.00418	2.71689	2.86054	2.23609	2.22595	2.23102	2.76261	3.04609	2.90435
chr1	9576426	9576985	+	ENSG00000231181	RP13-15M17.1	processed_pseudogene	other	never	0.503133	0.323847	0.41349	0.634552	0.109819	0.372186	1.03489	0.685242	0.860066	0.405867	0.410895	0.408381	0.541375	0.766218	0.653797
chr1	9588921	9614873	+	ENSG00000188807	TMEM201	protein_coding	coding	constitutive	7.84075	7.1672	7.50397	4.71006	4.51503	4.61254	6.41786	6.28941	6.35363	4.74206	4.61329	4.67767	8.80333	6.2857	7.54451
chr1	9651731	9729114	+	ENSG00000171608	PIK3CD	protein_coding	coding	constitutive	4.48742	6.79225	5.63983	6.31874	5.34372	5.83123	7.54201	4.99183	6.26692	6.95123	8.14737	7.5493	7.22994	4.66126	5.9456
chr1	9729025	9824526	-	ENSG00000171603	CLSTN1	protein_coding	coding	constitutive	38.6419	39.8927	39.2673	40.9365	33.9623	37.4494	66.8204	50.6877	58.754	45.5292	41.6323	43.5808	64.5144	42.1312	53.3228
chr1	9652609	9654586	-	ENSG00000179840	PIK3CD-AS1	antisense	lncRNA	never	0	0	0	0	0	0	0	0	0	0	0	0	0	0	0
chr1	9660827	9662626	-	ENSG00000233268	RP11-558F24.2	processed_pseudogene	other	never	0	0	0	0	0	0	0	0	0	0	0.0909644	0.0454822	0	0.0471184	0.0235592
chr1	9672425	9687555	-	ENSG00000231789	PIK3CD-AS2	antisense	lncRNA	constitutive	5.56658	4.93405	5.25031	6.09139	5.89641	5.9939	5.39193	5.72976	5.56084	7.13483	4.41891	5.77687	4.40967	3.67042	4.04005
chr1	9780821	9781240	+	ENSG00000271264	MZT1P1	processed_pseudogene	other	never	0	0	0	0	0	0	0	0	0	0.482105	0	0.241053	0	0	0
chr1	9827609	9828258	-	ENSG00000280113	AL357140.1	protein_coding	coding	never	0	0	0	0	0.0871988	0.0435994	0.0342388	0	0.0171194	0.0537114	0.0652521	0.0594817	0.0286577	0.0225332	0.0255954
chr1	9848275	9910336	-	ENSG00000178585	CTNNBIP1	protein_coding	coding	constitutive	33.2274	38.5112	35.8693	51.2043	55.199	53.2017	47.7615	45.1936	46.4776	57.5736	45.5171	51.5453	97.1242	57.1259	77.1251
chr1	9848317	9850154	+	ENSG00000223989	RP11-84A14.5	antisense	lncRNA	never	0	0	0	0.28328	0	0.14164	0.141167	0	0.0705835	0.479206	0.362005	0.420606	0.354469	0.18581	0.270139
chr1	9922112	9943407	-	ENSG00000162441	LZIC	protein_coding	coding	constitutive	10.982	9.81311	10.3976	9.89147	11.0957	10.4936	11.8619	13.1232	12.4925	13.9628	13.1922	13.5775	10.4053	15.6812	13.0433
chr1	9942922	9949974	+	ENSG00000228150	RP11-84A14.4	sense_intronic	lncRNA	never	0.278471	0.341248	0.30986	0.219505	0.334301	0.276903	0.32816	0.166876	0.247518	0.205918	0.208468	0.207193	0.0549336	0.259162	0.157048
chr1	9943427	9985501	+	ENSG00000173614	NMNAT1	protein_coding	coding	constitutive	2.20396	2.12095	2.16246	2.54536	2.68466	2.61501	2.65029	3.42403	3.03716	5.58092	4.69314	5.13703	3.45817	5.13924	4.2987
chr1	9983140	9984568	+	ENSG00000241326	RP11-807G9.2	sense_intronic	lncRNA	stage_specific	0.473837	0.748495	0.611166	1.0124	2.04119	1.52679	0.11304	0.665213	0.389126	3.06274	2.31607	2.6894	1.47349	1.66686	1.57018
chr1	9947317	9947636	+	ENSG00000202415	RN7SKP269	misc_RNA	other	never	1.1615	0.632599	0.89705	0.824001	0.522889	0.673445	0.410626	0.870052	0.640339	0.858882	0.695617	0.77725	0.57282	1.44128	1.00705
chr1	9951230	9960832	-	ENSG00000283611	RP11-84A14.6	unitary_pseudogene	other	never	0	0	0	0.0500409	0	0.0250204	0	0	0	0.117358	0.142574	0.129966	0	0	0
chr1	9967380	9967458	+	ENSG00000265521	MIR5697	miRNA	other	never	0	0	0	0	0	0	0	0	0	0	0	0	0	0	0
chr1	9997205	10016020	+	ENSG00000162444	RBP7	protein_coding	coding	stage_specific	6.51386	5.29114	5.9025	3.97315	2.74112	3.35713	1.2351	0.785096	1.0101	0.719659	0.650112	0.684886	0.561192	0.39481	0.478001
chr1	10032831	10181239	+	ENSG00000130939	UBE4B	protein_coding	coding	constitutive	29.4933	27.2899	28.3916	19.7104	21.4669	20.5887	22.8918	19.3527	21.1223	20.3717	19.9341	20.1529	20.7064	17.2476	18.977
chr1	10054444	10054781	-	ENSG00000224340	RP11-496H15.2	processed_pseudogene	other	never	0	0	0	0	0	0	0	0	0	0	0.225803	0.112902	0	0	0
chr1	10058670	10059648	+	ENSG00000233623	PGAM1P11	processed_pseudogene	other	never	0	0.0184698	0.0092349	0.0427701	0.0407111	0.0417406	0.0319705	0.0406443	0.0363074	0	0.121859	0.0609295	0.0267592	0.0210404	0.0238998
chr1	10163267	10163374	+	ENSG00000201746	RNU6-828P	snRNA	other	never	0	0	0	0	0	0	0	0	0	0	0	0	0	24.7051	12.3526
chr1	10210804	10381603	+	ENSG00000054523	KIF1B	protein_coding	coding	constitutive	20.0193	20.4118	20.2156	17.8798	16.6348	17.2573	12.2633	14.456	13.3597	13.0702	16.052	14.5611	14.1842	15.996	15.0901
chr1	10306464	10306757	+	ENSG00000264501	RN7SL731P	misc_RNA	other	constitutive	19.1467	14.7544	16.9505	11.0747	14.1086	12.5916	14.002	11.6157	12.8088	18.6457	24.6411	21.6434	30.2201	19.4572	24.8387
chr1	10227717	10227803	+	ENSG00000264881	MIR1273D	miRNA	other	never	0	0	0	0	0	0	0	0	0	0	0	0	0	0	0
chr1	10298965	10299072	+	ENSG00000199562	RNU6-37P	snRNA	other	stage_specific	0	5.80896	2.90448	25.1097	0	12.5549	40.9516	2.6513	21.8014	5.3535	31.5898	18.4717	5.71272	6.73775	6.22523
chr1	10398591	10420144	+	ENSG00000142657	PGD	protein_coding	coding	constitutive	215.562	136.575	176.069	98.6071	161.868	130.238	132.15	116.368	124.259	176.123	107.16	141.642	142.3	95.4831	118.892
chr1	10429880	10430677	-	ENSG00000271989	RP4-736L20.3	antisense	lncRNA	never	0.244162	0.265959	0.255061	0.0855381	0.227977	0.156758	0.281334	0.097544	0.189439	0.324429	0.225268	0.274848	0.513764	0.151487	0.332626
chr1	10430101	10452153	+	ENSG00000251503	APITD1-CORT	protein_coding	coding	constitutive	18.1298	6.63944	12.3846	3.25402	9.66897	6.4615	10.5046	4.23665	7.37063	11.8249	2.03696	6.93093	14.1439	6.67127	10.4076
chr1	10430442	10442809	+	ENSG00000175279	CENPS	protein_coding	coding	constitutive	8.54915	6.96992	7.75953	12.1225	12.9559	12.5392	11.7284	12.0513	11.8898	31.0686	23.7182	27.3934	20.8955	17.4103	19.1529
chr1	10449718	10451902	+	ENSG00000241563	CORT	protein_coding	coding	never	0.116181	0.126148	0.121164	0.163922	0.0523521	0.108137	0.149385	0.330673	0.240029	0.798456	1.9198	1.35913	0.35161	0.555755	0.453682
chr1	10456521	10472526	-	ENSG00000160049	DFFA	protein_coding	coding	constitutive	77.2312	64.0272	70.6292	39.9013	48.0921	43.9967	33.7124	33.55	33.6312	26.9742	19.6932	23.3337	21.911	19.0732	20.4921
chr1	10458554	10459338	+	ENSG00000203469	RP5-1113E3.3	antisense	lncRNA	never	0.746939	1.62159	1.18426	0.824286	0.971414	0.89785	0.49879	0.764667	0.631729	1.96149	0.778616	1.37005	0.540274	0.579287	0.559781
chr1	10472287	10630758	+	ENSG00000142655	PEX14	protein_coding	coding	constitutive	12.543	13.0444	12.7937	15.0159	16.3987	15.7073	14.1523	11.9988	13.0755	17.7906	11.8318	14.8112	16.1269	10.5978	13.3623
chr1	10616835	10617115	+	ENSG00000243267	RN7SL614P	misc_RNA	other	never	0	0.808897	0.404448	0.133796	0	0.066898	0.400048	0.635729	0.517888	0	1.14361	0.571805	0.837096	0.921476	0.879286
chr1	10636603	10796650	-	ENSG00000130940	CASZ1	protein_coding	coding	constitutive	1.6798	2.28812	1.98396	1.64068	1.64551	1.64309	1.90054	1.65951	1.78002	5.40385	11.717	8.56043	14.5353	15.9133	15.2243
chr1	10639240	10654333	+	ENSG00000272078	RP4-734G22.3	antisense	lncRNA	never	0.0185219	0.0246588	0.0215904	0.038933	0.0271764	0.0330547	0.0135811	0.00863285	0.011107	0.344068	0.382249	0.363158	0.149399	0.111086	0.130243
chr1	10895760	10895998	+	ENSG00000225158	HSPE1P24	processed_pseudogene	other	never	0	0	0	0	0	0	0	0	0	0	0	0	0	0	0
chr1	10946470	10982037	-	ENSG00000175262	C1orf127	protein_coding	coding	never	0.022174	0.0331912	0.0276826	0.0186134	0.138608	0.0786107	0.115848	0.0719957	0.0939219	0.5496	1.00624	0.77792	0.214165	0.399925	0.307045
chr1	10990977	10991797	-	ENSG00000215785	CFL1P6	processed_pseudogene	other	never	0	0	0	0.0709857	0	0.0354928	0.0530617	0.0674575	0.0602596	0.166479	0.168541	0.16751	0.0444123	0	0.0222062
chr1	11012343	11026420	+	ENSG00000120948	TARDBP	protein_coding	coding	constitutive	309.206	153.85	231.528	128.815	219.527	174.171	217.966	177.278	197.622	228.318	133.202	180.76	176.996	162.843	169.919
chr1	11012661	11030528	+	ENSG00000277726	RP4-635E18.9	protein_coding	coding	stage_specific	0.741869	0.626949	0.684409	1.12783	0.283459	0.705645	2.12528	1.79884	1.96206	1.46076	2.19354	1.82715	1.42158	2.37527	1.89843
chr1	11029658	11030528	+	ENSG00000271895	RP4-635E18.8	antisense	lncRNA	constitutive	2.33465	3.14224	2.73845	3.82744	3.49258	3.66001	11.7324	8.54256	10.1375	8.4284	13.1522	10.7903	8.69896	10.1593	9.42913
chr1	11026522	11047233	-	ENSG00000009724	MASP2	protein_coding	coding	pp1_restricted	0.276848	0.181113	0.228981	0.078344	0.0855658	0.0819549	0.0554348	0.0346997	0.0450673	2.33983	2.72717	2.5335	0.0780522	0.13515	0.106601
chr1	11054583	11060024	-	ENSG00000116649	SRM	protein_coding	coding	constitutive	180.43	117.066	148.748	54.9047	84.0946	69.4997	83.3893	59.2233	71.3063	41.3188	38.6645	39.9916	63.6824	41.2183	52.4504
chr1	11066617	11099881	-	ENSG00000171824	EXOSC10	protein_coding	coding	constitutive	40.7462	31.0696	35.9079	34.0501	41.1897	37.6199	38.0303	36.6609	37.3456	40.2691	36.5779	38.4235	37.6951	35.8248	36.76
chr1	11068470	11073097	+	ENSG00000226849	RP4-635E18.7	antisense	lncRNA	never	0.083523	0.0909794	0.0872512	0.0952105	0.0231388	0.0591747	0.193824	0.361913	0.277869	0.296707	0.273755	0.285231	0.207857	0.119587	0.163722
chr1	11099674	11102100	+	ENSG00000230337	RP4-635E18.6	antisense	lncRNA	stage_specific	3.00068	1.07036	2.03552	1.82357	2.46007	2.14182	0.711669	0.415238	0.563454	0.580306	0.511789	0.546048	0.803248	0.940877	0.872062
chr1	11106534	11262507	-	ENSG00000198793	MTOR	protein_coding	coding	constitutive	25.5015	26.9622	26.2319	16.8465	18.8051	17.8258	23.6312	20.3555	21.9933	17.6181	19.7525	18.6853	25.074	18.9811	22.0276
chr1	11143897	11149537	+	ENSG00000225602	MTOR-AS1	antisense	lncRNA	never	0	0.0175332	0.0087666	0.0203008	0	0.0101504	0	0	0	2.15e-48	0.0425184	0.0212592	0.0254021	0	0.0127011
chr1	11152349	11152452	+	ENSG00000253086	RNU6-537P	snRNA	other	never	0	0	0	0	0	0	0	0	0	0	0	0	0	0	0
chr1	11189340	11195981	+	ENSG00000171819	ANGPTL7	protein_coding	coding	never	0	0.00853217	0.00426609	0.00493943	0	0.00246971	0	0	0	0.0231683	0.107416	0.0652921	0.0123615	0.00971965	0.0110406
chr1	11226253	11226360	+	ENSG00000207451	RNU6-291P	snRNA	other	never	0	0	0	0	0	0	0	0	0	0	0	0	0	0	0
chr1	11232962	11233112	+	ENSG00000238173	RPL39P6	processed_pseudogene	other	never	0	0	0	0	0	0	0.90846	0	0.45423	0	0	0	0	0	0
chr1	11273205	11296049	+	ENSG00000120942	UBIAD1	protein_coding	coding	constitutive	11.8452	11.355	11.6001	6.63793	6.34818	6.49306	9.75412	8.92571	9.33991	8.076	6.91209	7.49404	10.4893	8.32082	9.40506
chr1	11278615	11279351	-	ENSG00000238199	UBE2V2P3	processed_pseudogene	other	never	0	0	0	0	0.0846898	0.0423449	0	0	0	0.208664	0.168999	0.188832	0	0	0
chr1	11425256	11425821	-	ENSG00000224338	MTCYBP45	processed_pseudogene	other	never	0	0	0	0	0	0	0	0	0	0	0	0	0	0	0
chr1	11479165	11537584	+	ENSG00000204624	DISP3	protein_coding	coding	stage_specific	1.06675	2.30333	1.68504	0.548642	0.606723	0.577682	1.36807	1.11099	1.23953	0.392511	0.400296	0.396404	3.29328	2.16573	2.72951
chr1	11609530	11613355	+	ENSG00000235643	RP1-69M21.2	lincRNA	lncRNA	never	0	0.0161105	0.00805525	0	0.0177554	0.0088777	0	0	0	0.0218733	0	0.0109366	0	0.00917637	0.00458818
chr1	11648366	11655785	-	ENSG00000116661	FBXO2	protein_coding	coding	constitutive	37.359	37.4712	37.4151	14.7922	12.9374	13.8648	6.42073	4.61885	5.51979	12.7763	9.45528	11.1158	18.3289	11.3792	14.8541
chr1	11654374	11663327	+	ENSG00000132879	FBXO44	protein_coding	coding	constitutive	14.01	14.9056	14.4578	11.5455	8.93072	10.2381	13.2596	8.03757	10.6486	16.8392	11.8841	14.3616	14.3482	10.887	12.6176
chr1	11664123	11674354	+	ENSG00000116663	FBXO6	protein_coding	coding	stage_specific	0.768888	0.382281	0.575585	1.53935	2.03796	1.78866	1.82418	1.26118	1.54268	3.10497	2.60449	2.85473	2.51436	1.93922	2.22679
chr1	11674479	11691650	-	ENSG00000116670	MAD2L2	protein_coding	coding	constitutive	266.232	229.771	248.001	44.7757	59.2374	52.0065	86.8811	64.823	75.8521	103.046	60.1491	81.5975	103.015	61.4711	82.243
chr1	11691728	11725857	+	ENSG00000162490	DRAXIN	protein_coding	coding	constitutive	6.54652	5.34337	5.94494	1.40974	1.26844	1.33909	2.63603	2.28378	2.45991	1.75673	1.60164	1.67918	1.70288	1.38013	1.5415
chr1	11736083	11754802	+	ENSG00000177674	AGTRAP	protein_coding	coding	constitutive	64.9609	65.1802	65.0705	46.0337	52.2587	49.1462	56.751	42.2614	49.5062	50.7452	36.7015	43.7234	38.815	28.6537	33.7343
chr1	11761786	11789585	+	ENSG00000215910	C1orf167	protein_coding	coding	never	0.338	0.958276	0.648138	1.28126	0.478473	0.879866	0.611256	0.491094	0.551175	1.06878	0.022461	0.54562	0.192843	0.242858	0.217851
chr1	11806095	11843144	+	ENSG00000011021	CLCN6	protein_coding	coding	constitutive	5.97445	8.42714	7.2008	5.88507	5.73925	5.81216	6.78392	5.59464	6.18928	8.59723	8.83217	8.7147	7.42361	6.92894	7.17628
chr1	11841016	11848079	+	ENSG00000242349	NPPA-AS1	antisense	lncRNA	stage_specific	0.21296	0.569183	0.391072	0.557618	1.10536	0.831489	0.441514	0.499006	0.47026	1.21489	1.5848	1.39985	1.69994	1.89306	1.7965
chr1	11843811	11843984	+	ENSG00000276470	NPPA-AS1_1	misc_RNA	other	pp2_restricted	0	0.571707	0.285853	4.60092	3.34e-49	2.30046	0	0.262794	0.131397	0	6.19e-12	3.09e-12	4.48771	2.9777	3.73271
chr1	11845548	11845697	+	ENSG00000278852	NPPA-AS1_2	misc_RNA	other	pp1_restricted	0	0	0	9.19e-84	5.36e-11	2.68e-11	0	0	0	16.7831	2.48617	9.63463	3.25191	4.39e-194	1.62596
chr1	11847441	11847549	+	ENSG00000275915	NPPA-AS1_3	misc_RNA	other	never	0	0	0	0	19.1715	9.58575	0	19.6233	9.81165	0	6.79122	3.39561	0	26.8656	13.4328
chr1	11777076	11779619	-	ENSG00000177553	RP11-56N19.5	antisense	lncRNA	never	0	0.00521929	0.00260964	0.0120862	0	0.0060431	0	0	0	0	0.00901555	0.00450778	0	0	0
chr1	11785722	11806920	-	ENSG00000177000	MTHFR	protein_coding	coding	constitutive	4.99613	7.17606	6.0861	5.88191	5.65542	5.76867	4.47887	4.18101	4.32994	6.55274	7.5234	7.03807	7.87019	4.95821	6.4142
chr1	11845708	11848345	-	ENSG00000175206	NPPA	protein_coding	coding	never	0	0	0	0.0156363	0	0.00781815	0	0	0	0.471006	0.716604	0.593805	0.0782378	0.0461472	0.0621925
chr1	11857463	11858931	-	ENSG00000120937	NPPB	protein_coding	coding	stage_specific	1.9427	0.0537999	0.99825	0.726734	6.91748	3.82211	0.0310418	0	0.0155209	214.945	145.128	180.036	67.0592	43.8002	55.4297
chr1	11877769	11880406	+	ENSG00000224904	RP5-934G17.6	processed_pseudogene	other	never	0	0	0	0	0	0	0	0	0	0.00967811	0.0039192	0.00679865	0.00774563	0.0020301	0.00488786
chr1	11908151	11908271	+	ENSG00000199347	RNU5E-1	snRNA	other	gt_restricted	12.7944	0	6.3972	0	0	0	12.0618	7.66713	9.86446	0	7.66246	3.83123	10.0957	0	5.04785
chr1	11909807	11909927	-	ENSG00000201801	RNU5E-4P	snRNA	other	never	0	0	0	0	0	0	0	0	0	0	0	0	0	0	0
chr1	11919590	11926428	-	ENSG00000116685	KIAA2013	protein_coding	coding	constitutive	26.0603	23.3875	24.7239	22.2494	20.8364	21.5429	21.102	19.0142	20.0581	22.4805	16.0915	19.286	26.9166	16.4988	21.7077
chr1	11934204	11975538	+	ENSG00000083444	PLOD1	protein_coding	coding	constitutive	35.5942	34.1891	34.8916	47.6408	48.7083	48.1746	37.0559	24.8866	30.9713	22.9455	20.6896	21.8176	35.7168	27.0774	31.3971
chr1	11980180	12013514	+	ENSG00000116688	MFN2	protein_coding	coding	constitutive	31.6313	22.3788	27.0051	15.3808	22.0066	18.6937	27.1854	16.3776	21.7815	24.9108	14.4014	19.6561	31.8814	16.7658	24.3236
chr1	12017215	12017308	-	ENSG00000270914	RP5-1077B9.5	processed_pseudogene	other	never	0	0	0	0	0	0	0	0	0	0	0	0	0	0	0
chr1	12019465	12032045	+	ENSG00000116691	MIIP	protein_coding	coding	constitutive	35.7416	29.8818	32.8117	41.61	46.9433	44.2766	28.8052	19.6309	24.2181	29.1258	16.8547	22.9902	20.8398	15.6577	18.2488
chr1	12024011	12024124	-	ENSG00000202461	Y_RNA	misc_RNA	other	never	0	0	0	13.8498	0	6.9249	0	0	0	0	26.3069	13.1534	17.3303	0	8.66515
chr1	12029157	12029222	+	ENSG00000276869	MIR6729	miRNA	other	never	0	0	0	0	0	0	0	0	0	0	0	0	0	0	0
chr1	12036739	12037014	-	ENSG00000243539	RN7SL649P	misc_RNA	other	never	0	0	0	0	0	0	0	0	0	0	0.268933	0.134466	0	0	0
chr1	12063376	12144207	+	ENSG00000120949	TNFRSF8	protein_coding	coding	es_restricted	4.61867	4.44865	4.53366	0.371719	0.307464	0.339591	0.0203414	0.0220736	0.0212075	0.036901	0.00498084	0.0209409	0.0170755	0.00515998	0.0111177
chr1	12077880	12077984	-	ENSG00000201135	RNU6-777P	snRNA	other	never	0	0	0	0	0	0	0	0	0	0	0	0	0	0	0
chr1	12080292	12080547	-	ENSG00000227875	RPL23AP89	processed_pseudogene	other	never	0	0	0	0	0	0	0	0	0	0	0	0	0	0	0
chr1	12166942	12209228	+	ENSG00000028137	TNFRSF1B	protein_coding	coding	never	0.99063	0.671687	0.831159	0.049036	0.191181	0.120109	0.0360985	0.157089	0.0965938	0.11868	0.0948168	0.106748	0.00371337	0.00730093	0.00550715
chr1	12191712	12191773	+	ENSG00000263676	MIR4632	miRNA	other	never	0	0	0	0	0	0	0	0	0	0	0	0	0	0	0
chr1	12220793	12221109	-	ENSG00000225196	RPL10P17	processed_pseudogene	other	never	0	0	0	0	0	0	0	0	0	0	0	0	0	0	0
chr1	12221147	12221271	-	ENSG00000252969	SNORA70	snoRNA	other	never	0	0	0	0	0	0	0	0	0	0	0	0	0	0	0
chr1	12230066	12512047	+	ENSG00000048707	VPS13D	protein_coding	coding	constitutive	5.59131	6.21141	5.90136	4.79949	4.33348	4.56649	4.40641	5.36845	4.88743	13.8683	32.4721	23.1702	6.76976	6.26996	6.51986
chr1	12507245	12507397	+	ENSG00000239149	SNORA59A	snoRNA	other	constitutive	9.40424	13.1706	11.2874	12.7078	9.67685	11.1923	7.59927	11.2711	9.43519	35.7636	39.1568	37.4602	20.1417	15.8372	17.9895
chr1	12527723	12528420	+	ENSG00000229484	RP5-888M10.2	lincRNA	lncRNA	never	0	0	0	0	0	0	0	0	0	0	0.0841255	0.0420628	0	0	0
chr1	12567909	12617731	-	ENSG00000162496	DHRS3	protein_coding	coding	stage_specific	3.62232	3.18924	3.40578	1.84362	0.728229	1.28592	2.99863	3.49681	3.24772	116.937	105.655	111.296	29.3634	22.2463	25.8048
chr1	12569971	12570072	-	ENSG00000221340	RNU6ATAC18P	snRNA	other	pp2_restricted	0	0	0	0	0	0	0	54.0899	27.045	0	216.228	108.114	71.2229	56.0016	63.6123
chr1	12578956	12579023	-	ENSG00000276830	MIR6730	miRNA	other	never	0	0	0	0	0	0	0	0	0	0	0	0	0	0	0
chr1	12618899	12619244	-	ENSG00000272482	RP11-474O21.5	lincRNA	lncRNA	pp1_restricted	0.592362	0.322623	0.457493	0	0	0	0.223379	0.0709956	0.147187	13.1408	9.79143	11.4661	0.747868	0.955563	0.851715
chr1	12644546	12667086	+	ENSG00000204518	AADACL4	protein_coding	coding	never	0	0	0	0	0	0	0	0	0	0.137754	0.202218	0.169986	0.027562	0	0.013781
chr1	12692908	12693020	+	ENSG00000226166	RP11-474O21.2	processed_pseudogene	other	never	0	0	0	0	0	0	0	0	0	0	0	0	0	0	0
chr1	12716114	12728759	+	ENSG00000188984	AADACL3	protein_coding	coding	never	0.0087684	0.103716	0.0562422	0	0	0	0	0	0	0	0.0137685	0.00688425	0.00345912	0.00815959	0.00580936
chr1	12746214	12763699	+	ENSG00000157330	C1orf158	protein_coding	coding	stage_specific	0	0.0194725	0.00973625	0	0	0	0.00224164	0	0.00112082	4.09249	8.29498	6.19374	1.62834	1.40749	1.51791
chr1	12774840	12777906	+	ENSG00000116726	PRAMEF12	protein_coding	coding	never	0	0	0	0	0	0	0	0	0	0.0149109	0.0241529	0.0195319	0.0159114	0	0.0079557
chr1	12791396	12796628	+	ENSG00000116721	PRAMEF1	protein_coding	coding	never	0	0	0	0	0	0	0	0	0	0	0	0	0	0	0
chr1	12822685	12823159	-	ENSG00000228338	RP5-845O24.8	lincRNA	lncRNA	never	0	0	0	0	0	0	0	0	0	0	0	0	0	0	0
chr1	12824604	12831410	-	ENSG00000239810	PRAMEF11	protein_coding	coding	never	0	0	0	0	0	0	0	0	0	0	0	0	0	0	0
chr1	12838124	12841357	-	ENSG00000231103	PRAMEF30P	unprocessed_pseudogene	other	never	0	0	0	0	0	0	0	0	0	0	0	0	0	0	0
chr1	12847407	12848725	-	ENSG00000179172	HNRNPCL1	protein_coding	coding	never	0.0442801	0.0241166	0.0341984	0.0260615	0.0467787	0.0364201	0.0974047	0.0619155	0.0796601	0.0261946	0.00618778	0.0161912	0.0046587	0.0247258	0.0146923
chr1	12857085	12861909	+	ENSG00000120952	PRAMEF2	protein_coding	coding	never	0	0	0	0	0	0	0	0	0	0	0	0	0	0	0
chr1	12879223	12886201	-	ENSG00000243073	PRAMEF4	protein_coding	coding	never	0	0	0	0	0	0	0	0	0	0	0	0	0	0	0
chr1	12892895	12898270	-	ENSG00000187545	PRAMEF10	protein_coding	coding	never	0	0	0	0	0	0	0	0	0	0	0	0	0	0.00374949	0.00187474
chr1	12916609	12920482	+	ENSG00000204510	PRAMEF7	protein_coding	coding	never	0	0	0	0	0	0	0	0	0	0	0	0	0	0	0
chr1	12922553	12922660	+	ENSG00000207434	RNU6-1072P	snRNA	other	never	0	0	0	0	0	0	0	0	0	0	0	0	0	0	0
chr1	12926161	12928253	+	ENSG00000234064	PRAMEF29P	unprocessed_pseudogene	other	never	0	0	0	0	0	0	0	0	0	0	0	0	0	0	0
chr1	12938471	12947580	-	ENSG00000232423	PRAMEF6	protein_coding	coding	never	0	0	0	0	0	0	0	0	0	0	0	0	0	0	0
chr1	13029338	13032130	+	ENSG00000274178	PRAMEF28P	unprocessed_pseudogene	other	never	0	0	0	0	0	0	0	0	0	0	0	0	0	0	0
chr1	13049475	13056491	-	ENSG00000274764	PRAMEF27	protein_coding	coding	never	0	0	0	0	0	0	0	0	0	0	0.00287831	0.00143915	0	0	0
chr1	13060852	13077884	+	ENSG00000229571	PRAMEF25	protein_coding	coding	never	0	0	0	0	0	0	0	0	0	0	0	0	0	0	0
chr1	13060868	13062229	+	ENSG00000277058	HNRNPCL3	protein_coding	coding	never	0.00565169	0.00692577	0.00628873	0.00570234	0.0108556	0.00827897	0.0173164	0.00423353	0.010775	0	0	0	0	0.00876631	0.00438315
chr1	13095178	13097971	-	ENSG00000277862	PRAMEF34P	unprocessed_pseudogene	other	never	0	0	0	0	0	0	0	0	0	0	0	0	0	0	0
chr1	13104402	13105689	-	ENSG00000236179	PRAMEF35P	unprocessed_pseudogene	other	never	0	0	0	0	0	0	0	0	0	0	0	0	0	0	0
chr1	13115495	13116854	-	ENSG00000275774	HNRNPCL2	protein_coding	coding	never	0.00565169	0	0.00282585	0.00570234	0.00678477	0.00624355	0.0133203	0.00169341	0.00750685	0	0	0	0	0.00350653	0.00175326
chr1	13128817	13131615	+	ENSG00000229978	PRAMEF36P	transcribed_unprocessed_pseudogene	other	never	0	0	0	0	0	0	0	0	0	0	0	0	0	0	0
chr1	13146980	13147460	-	ENSG00000233336	RP13-221M14.2	lincRNA	lncRNA	never	0	0	0	0	0	0	0	0	0	0	0	0	0	0	0
chr1	13148904	13155961	-	ENSG00000280267	PRAMEF26	protein_coding	coding	never	0	0	0	0	0	0	0	0	0	0	0	0	0	0	0
chr1	13164585	13165467	-	ENSG00000179412	HNRNPCL4	protein_coding	coding	never	0.00789568	0.00967564	0.00878566	0.00796644	0.0151658	0.0115661	0.0241918	0.00591444	0.0150531	0	0	0	0	0.012247	0.0061235
chr1	13172454	13179464	+	ENSG00000204505	PRAMEF9	protein_coding	coding	never	0	0	0	0	0	0	0	0	0	0	0	0	0	0	0
chr1	13196822	13199589	-	ENSG00000279169	PRAMEF13	unprocessed_pseudogene	other	never	0	0	0	0	0	0	0	0	0	0	0	0	0	0	0
chr1	13222694	13226133	-	ENSG00000279804	PRAMEF18	protein_coding	coding	never	0	0	0	0	0	0	0	0	0	0	0	0	0	0	0
chr1	13245862	13248652	+	ENSG00000250894	PRAMEF31P	unprocessed_pseudogene	other	never	0	0	0	0	0	0	0	0	0	0	0	0	0.0108045	0	0.00540225
chr1	13254211	13263314	+	ENSG00000270601	PRAMEF5	protein_coding	coding	never	0	0	0	0	0	0	0	0	0	0	0	0	0	0	0
chr1	13273538	13275627	-	ENSG00000231219	PRAMEF32P	unprocessed_pseudogene	other	never	0	0	0	0	0	0	0	0	0	0	0	0	0	0	0
chr1	13279124	13279231	-	ENSG00000207511	RNU6-771P	snRNA	other	never	0	0	0	0	0	0	0	0	0	0	0	0	0	0	0
chr1	13281034	13285174	-	ENSG00000182330	PRAMEF8	protein_coding	coding	never	0	0	0	0	0	0	0	0	0	0	0	0	0	0	0
chr1	13303508	13322598	+	ENSG00000204501	PRAMEF15	protein_coding	coding	never	0	0	0	0	0	0	0	0	0	0	0.00342339	0.0017117	0	0	0
chr1	13305954	13308887	+	ENSG00000237700	PRAMEF33P	unitary_pseudogene	other	never	0	0	0	0	0	0	0	0	0	0	0	0	0	0.00405861	0.0020293
chr1	13324038	13324518	+	ENSG00000228229	RP11-219C24.10	lincRNA	lncRNA	never	0	0	0	0	0	0	0	0	0	0	0	0	0	0	0
chr1	13342033	13347134	-	ENSG00000204481	PRAMEF14	protein_coding	coding	never	0	0	0	0	0	0	0	0	0	0	0	0	0	0	0
chr1	13369066	13371693	-	ENSG00000204480	PRAMEF19	protein_coding	coding	never	0	0	0	0	0	0	0	0	0	0	0	0	0	0	0
chr1	13389631	13392629	+	ENSG00000204479	PRAMEF17	protein_coding	coding	never	0	0	0	0	0	0	0	0	0	0	0	0	0	0	0
chr1	13410449	13421328	+	ENSG00000204478	PRAMEF20	protein_coding	coding	never	0	0	0	0	0	0	0	0	0	0	0	0	0	0	0
chr1	13474976	13514048	-	ENSG00000162494	LRRC38	protein_coding	coding	never	0.0397332	0.112529	0.0761311	0.0551228	0.0476992	0.051411	0	0	0	0.0470096	0.0428327	0.0449211	0.0188115	0.0147912	0.0168013
chr1	13513219	13516270	+	ENSG00000259961	RP4-597A16.2	antisense	lncRNA	never	0	0	0	0	0	0	0	0	0	0	0	0	0	0	0
chr1	13555000	13555694	+	ENSG00000215909	BRWD1P1	processed_pseudogene	other	never	0	0	0	0	0	0	0	0	0	0	0.0596583	0.0298291	0	0	0
chr1	13583464	13617957	+	ENSG00000162493	PDPN	protein_coding	coding	constitutive	97.1622	62.8546	80.0084	7.08861	8.68765	7.88813	3.50371	3.70946	3.60658	7.2788	4.36523	5.82202	6.9633	3.11068	5.03699
chr1	13623183	13623284	-	ENSG00000222952	RNA5SP41	rRNA	other	never	0	0	0	0	0	0	0	0	0	0	0	0	0	0	0
chr1	13657310	13659910	-	ENSG00000237445	CTA-520D8.2	lincRNA	lncRNA	never	0	0	0	0	0	0	0	0	0	0	0	0	0	0	0
chr1	13696069	13696199	-	ENSG00000253085	SCARNA11	scaRNA	other	never	0	0	0	0	0	0	0	0	0	0	12.5715	6.28575	0	0	0
chr1	13700197	13825079	+	ENSG00000116731	PRDM2	protein_coding	coding	constitutive	7.25136	7.16851	7.20993	8.29862	6.00409	7.15135	9.68997	10.0404	9.86519	11.4469	12.5637	12.0053	12.4007	13.9847	13.1927
chr1	13892791	15118043	+	ENSG00000189337	KAZN	protein_coding	coding	constitutive	3.89499	7.82444	5.85971	3.50747	3.06227	3.28487	3.85516	3.07849	3.46683	3.30887	2.85248	3.08067	5.15466	3.98777	4.57121
chr1	15111814	15152464	-	ENSG00000175147	TMEM51-AS1	antisense	lncRNA	never	0.0966073	0.176561	0.136584	0.0954291	0.0148372	0.0551331	0.0756366	0.0443543	0.0599954	0.331212	0.363387	0.347299	0.926963	1.09348	1.01022
chr1	14124232	14124335	-	ENSG00000252151	RNU6-1265P	snRNA	other	never	0	0	0	0	0	0	0	0	0	0	0	0	0	0	0
chr1	14221890	14223118	-	ENSG00000231606	RP11-344F13.1	lincRNA	lncRNA	never	0	0	0	0	0	0	0	0	0	0	0	0	0	0	0
chr1	14348954	14391575	-	ENSG00000234593	RP4-704D23.1	lincRNA	lncRNA	never	0	0	0	0	0	0	0	0	0	0	0	0	0	0	0
chr1	14692128	14692613	-	ENSG00000235829	TBCAP2	processed_pseudogene	other	never	0	0	0	0	0	0	0	0	0	0	0.410213	0.205106	0	0	0
chr1	15152531	15220480	+	ENSG00000171729	TMEM51	protein_coding	coding	constitutive	3.39111	3.81911	3.60511	1.81547	2.4935	2.15449	2.12055	1.64374	1.88214	4.95489	6.39034	5.67262	9.33022	9.52797	9.4291
chr1	15164343	15171317	-	ENSG00000204464	C1orf195	lincRNA	lncRNA	never	0.175305	0	0.0876525	0	0.345516	0.172758	0.130691	0	0.0653455	0.425653	0.379929	0.402791	0	0	0
chr1	15191827	15192845	-	ENSG00000215720	RP1-21O18.3	processed_pseudogene	other	never	0	0	0	0	0	0	0.0600888	0.00954889	0.0348188	0.094263	0.114517	0.10439	0.025147	0	0.0125735
chr1	15226372	15227549	+	ENSG00000278480	RP5-903E17.2	processed_pseudogene	other	never	0.021048	0	0.010524	0	0	0	0	0.0126132	0.0063066	0.0311281	0.0126055	0.0218668	0.0498252	0.156708	0.103267
chr1	15247271	15400283	+	ENSG00000142621	FHAD1	protein_coding	coding	stage_specific	0.517159	0.622181	0.56967	0.355134	0.308976	0.332055	0.619049	0.781726	0.700388	12.0526	16.231	14.1418	2.92645	1.472	2.19923
chr1	15326679	15343876	-	ENSG00000233485	RP3-467K16.2	antisense	lncRNA	never	0	0	0	0.00691822	0	0.00345911	0	0	0	8.84e-118	0.0669483	0.0334742	0.0043284	0.00340336	0.00386588
chr1	15334165	15335464	-	ENSG00000236045	RP3-467K16.7	antisense	lncRNA	never	0	0	0	0	0	0	0	0	0	0.227878	0.442945	0.335411	0	0	0
chr1	15402978	15409433	-	ENSG00000228140	RP3-467K16.4	lincRNA	lncRNA	never	0	0.0069617	0.00348085	0.016121	0.00383623	0.00997861	0	0.00382994	0.00191497	0.0992453	0.224872	0.162059	0.00378231	0.0118959	0.00783911
chr1	15409894	15430343	+	ENSG00000142634	EFHD2	protein_coding	coding	constitutive	7.67944	7.70267	7.69106	19.1102	22.1191	20.6147	7.39139	4.85532	6.12336	13.6063	14.1937	13.9	12.6753	7.75462	10.215
chr1	15438438	15449242	+	ENSG00000162438	CTRC	protein_coding	coding	never	0	0.00294481	0.0014724	0	0	0	0	0.00486021	0.00243011	0.034215	0.101476	0.0678455	0.268959	0.0230685	0.146014
chr1	15456727	15472091	+	ENSG00000142615	CELA2A	protein_coding	coding	never	0	0	0	0	0.0134738	0.0067369	0	0.0297228	0.0148614	0	0.123545	0.0617725	0	0	0
chr1	15465908	15491400	+	ENSG00000215704	CELA2B	protein_coding	coding	never	0	0	0	0	0.013398	0.006699	0	0	0	0	0.339857	0.169929	0	0	0
chr1	15490831	15526534	-	ENSG00000132906	CASP9	protein_coding	coding	constitutive	10.4912	7.37868	8.93494	6.73124	7.72885	7.23004	5.64399	4.1155	4.87974	12.4504	10.8583	11.6544	8.22958	7.10161	7.66559
chr1	15526812	15592379	+	ENSG00000116138	DNAJC16	protein_coding	coding	constitutive	7.39427	5.46606	6.43016	7.81827	8.12975	7.97401	5.27909	7.35771	6.3184	8.80649	11.3573	10.0819	7.69567	9.81803	8.75685
chr1	15565610	15565956	-	ENSG00000272510	RP4-680D5.8	antisense	lncRNA	never	0.117625	0.128126	0.122875	0	0	0	0.110891	0	0.0554455	0.173957	0.405644	0.289801	0	0.145958	0.072979
chr1	15572352	15585110	-	ENSG00000116771	AGMAT	protein_coding	coding	es_restricted	3.00325	2.41386	2.70856	0.551099	0.932565	0.741832	0.974283	0.561115	0.767699	0.615458	0.398772	0.507115	0.648545	0.568037	0.608291
chr1	15542164	15542304	+	ENSG00000251866	SCARNA21	scaRNA	other	never	0	4.70852	2.35426	0	0	0	8.15027	0	4.07514	6.39278	0	3.19639	0	0	0
chr1	15586135	15603626	-	ENSG00000237301	RP4-680D5.2	antisense	lncRNA	never	0.0180813	0.0295432	0.0238123	0.0456083	0.0289418	0.037275	0.0227281	0.0180589	0.0203935	0.12479	0.119116	0.121953	0.0570698	0.093486	0.0752779
chr1	15604596	15605043	+	ENSG00000235084	CHCHD2P6	processed_pseudogene	other	never	1.97002	0.901276	1.43565	0.805719	1.40548	1.1056	1.07189	0.492459	0.782174	0.982263	0.42474	0.703502	1.98531	0.464466	1.22489
chr1	15608077	15608145	-	ENSG00000252417	RNU7-179P	snRNA	other	never	0	0	0	0	0	0	0	0	0	0	0	0	0	0	0
chr1	15614642	15614867	-	ENSG00000236500	CD24P1	processed_pseudogene	other	never	0	0	0	0	0	0	0	0	0	0	0	0	0	0	0
chr1	15617499	15669044	+	ENSG00000197312	DDI2	protein_coding	coding	constitutive	8.16439	7.18542	7.6749	5.30532	4.34476	4.82504	6.69752	8.53637	7.61695	5.83696	6.95797	6.39747	5.02619	5.61134	5.31876
chr1	15659868	15661722	+	ENSG00000215695	RSC1A1	protein_coding	coding	constitutive	6.11776	5.40957	5.76366	2.72462	2.95326	2.83894	4.33951	4.74912	4.54432	3.33739	3.35952	3.34845	3.01624	3.04723	3.03173
chr1	15682872	15683128	-	ENSG00000271742	RP4-680D5.9	lincRNA	lncRNA	never	0	0.154681	0.0773405	0	0	0	0.535494	0.170194	0.352844	0	0	0	0	1.05726	0.52863
chr1	15684331	15734769	+	ENSG00000116786	PLEKHM2	protein_coding	coding	constitutive	27.6777	19.5393	23.6085	26.4122	34.7534	30.5828	30.2538	19.3473	24.8006	20.6193	13.7459	17.1826	35.3048	19.267	27.2859
chr1	15736404	15741396	+	ENSG00000162461	SLC25A34	protein_coding	coding	pp2_restricted	0.276136	0.201046	0.238591	0.555509	0.97008	0.762795	0.431092	0.615301	0.523196	0.895665	0.998515	0.94709	1.63061	1.34095	1.48578
chr1	15720311	15736896	-	ENSG00000237938	RP11-288I21.1	antisense	lncRNA	never	0.293229	0.0399259	0.166577	0.229228	0.220011	0.224619	0.172776	0.021965	0.0973705	0.694961	1.06439	0.879676	0.202457	0.068224	0.135341
chr1	15740050	15749896	-	ENSG00000224459	RP11-169K16.4	antisense	lncRNA	never	0.0371688	0.0202435	0.0287061	0	0.0446206	0.0223103	0	0	0	0.084974	0.0970313	0.0910027	0.0293289	0.0230609	0.0261949
chr1	15742421	15747982	+	ENSG00000162460	TMEM82	protein_coding	coding	never	0.63091	0.648067	0.639489	0.512613	0.465752	0.489183	0.733096	0.610349	0.671723	0.394763	0.152591	0.273677	0.1819	0.105391	0.143646
chr1	15756606	15786594	+	ENSG00000162458	FBLIM1	protein_coding	coding	constitutive	35.9493	42.5733	39.2613	44.3214	36.1488	40.2351	28.1006	24.0653	26.083	38.8853	34.1639	36.5246	56.1501	45.2758	50.7129
chr1	15792795	15793285	+	ENSG00000224321	RPL12P14	processed_pseudogene	other	never	0.0570942	0.183464	0.120279	0.105011	0.0342704	0.0696407	0.174932	0.237788	0.20636	0.0351822	0.186354	0.110768	0.0450515	0.0797027	0.0623771
chr1	15807168	15809348	-	ENSG00000233954	UQCRHL	protein_coding	coding	constitutive	7.51541	4.30618	5.9108	3.88071	7.62817	5.75444	6.79625	4.87817	5.83721	5.56925	3.11492	4.34208	3.28855	2.38146	2.83501
chr1	15828231	15828669	+	ENSG00000178715	RP11-169K16.8	processed_pseudogene	other	stage_specific	1.60368	0.911675	1.25768	0.959609	1.16636	1.06298	1.82085	1.65548	1.73816	1.59267	2.39057	1.99162	1.29313	1.24918	1.27116
chr1	15834473	15848147	-	ENSG00000179743	FLJ37453	antisense	lncRNA	constitutive	1.25636	2.07189	1.66413	1.69074	1.79472	1.74273	2.53427	1.77916	2.15672	2.75073	1.94201	2.34637	2.98515	2.40815	2.69665
chr1	15847863	15940460	+	ENSG00000065526	SPEN	protein_coding	coding	constitutive	19.7871	18.4941	19.1406	20.7659	19.6154	20.1907	21.9584	21.1774	21.5679	16.8002	14.2313	15.5158	26.1924	18.985	22.5887
chr1	15917697	15917908	-	ENSG00000270620	RP1-134O19.3	unprocessed_pseudogene	other	never	0	0	0	0	0	0	0	0	0	0	0.34821	0.174105	0	0	0
chr1	15941868	15976132	-	ENSG00000116809	ZBTB17	protein_coding	coding	constitutive	15.3752	15.1748	15.275	17.67	16.6536	17.1618	21.5239	16.3316	18.9277	45.167	33.7473	39.4571	46.5794	30.6069	38.5932
chr1	15969631	15970194	+	ENSG00000234607	RP11-5P18.1	processed_pseudogene	other	never	0	0	0	0	0	0	0.0426291	0.0270973	0.0348632	0.334367	0.406212	0.370289	0	0.028055	0.0140275
chr1	15988181	15988441	+	ENSG00000231353	RP11-5P18.3	unprocessed_pseudogene	other	never	0	0	0	0	0	0	0	0	0	0	0.161428	0.080714	0	0	0
chr1	15989139	15989375	-	ENSG00000275503	RP11-5P18.11	processed_pseudogene	other	never	0	0	0	0	0	0	0	0	0	0	0	0	0	0	0
chr1	15989870	15994751	+	ENSG00000224966	TBC1D3P6	unprocessed_pseudogene	other	never	0	0	0	0	0	0	0	0	0	0	0	0	0	0	0
chr1	16004235	16008807	+	ENSG00000183888	C1orf64	protein_coding	coding	never	0.00561348	0.00305731	0.00433539	0.187613	0.296512	0.242063	0.550377	0.296026	0.423202	0.0274794	0.0075756	0.0175275	0.0177178	0.0104485	0.0140831
chr1	16006159	16006671	-	ENSG00000233078	RP11-5P18.5	antisense	lncRNA	never	0	0	0	0	0	0	0	0	0	0.0637652	0.102792	0.0832786	0	0	0
chr1	16014027	16019594	-	ENSG00000173641	HSPB7	protein_coding	coding	never	0.0118429	0.0135234	0.0126832	0.011487	0	0.0057435	0	0.0257738	0.0128869	0.250543	0.176754	0.213648	0.169463	0.0309438	0.100203
chr1	16018874	16034050	+	ENSG00000186510	CLCNKA	protein_coding	coding	pp2_restricted	0.525516	0.943379	0.734448	0.790903	0.823608	0.807256	0.340789	0.292533	0.316661	0.207274	0.53374	0.370507	1.48154	1.16015	1.32085
chr1	16035177	16040029	-	ENSG00000232456	RP11-5P18.10	unprocessed_pseudogene	other	never	0	0.149334	0.074667	0.498373	0.503424	0.500899	0.334519	0.425276	0.379897	0.691742	1.09152	0.891631	0.572708	0.33023	0.451469
chr1	16043735	16057308	+	ENSG00000184908	CLCNKB	protein_coding	coding	stage_specific	0.945604	1.24782	1.09671	1.46968	1.54343	1.50656	1.52794	1.48154	1.50474	1.08833	0.454594	0.771462	0.909365	0.428238	0.668802
chr1	16057768	16073632	-	ENSG00000185519	FAM131C	protein_coding	coding	stage_specific	0.160516	0.318935	0.239726	1.42384	0.796478	1.11016	1.0512	0.862505	0.956852	1.63798	2.73334	2.18566	1.43968	1.18512	1.3124
chr1	16124336	16156087	-	ENSG00000142627	EPHA2	protein_coding	coding	constitutive	7.81436	8.53194	8.17315	33.1032	39.2181	36.1606	5.27411	3.5108	4.39245	9.51354	8.37065	8.9421	21.8997	13.421	17.6604
chr1	16155210	16157329	+	ENSG00000227959	RP11-276H7.2	antisense	lncRNA	never	0.206405	0.324757	0.265581	0.115697	0.0550637	0.0853803	0.0432417	0	0.0216209	0.135669	0.30217	0.218919	0.108579	0.142291	0.125435
chr1	16159265	16161883	+	ENSG00000224621	RP11-276H7.3	antisense	lncRNA	never	0.0956124	0.286407	0.19101	0.0301466	0.0573907	0.0437686	0	0.0286483	0.0143242	0.141402	0.0572617	0.0993318	0.188613	0.148304	0.168459
chr1	16197853	16198357	+	ENSG00000234166	ARHGEF19-AS1	antisense	lncRNA	never	0	0.0761671	0.0380836	0	0	0	0	0	0	4.66e-33	1.39028	0.69514	0	0	0
chr1	16197853	16212609	-	ENSG00000142632	ARHGEF19	protein_coding	coding	constitutive	13.0931	15.5992	14.3461	6.56269	6.24516	6.40393	32.3429	22.2277	27.2853	16.4956	11.3128	13.9042	35.5773	25.9516	30.7645
chr1	16215908	16228027	-	ENSG00000237276	ANO7L1	transcribed_unprocessed_pseudogene	other	never	0.220959	0.31701	0.268985	0.152654	0.526195	0.339425	0.104332	0.00630636	0.0553192	0.0155635	0.167143	0.0913532	0.281617	0.459224	0.37042
chr1	16231699	16237162	-	ENSG00000132881	RSG1	protein_coding	coding	constitutive	3.51751	2.91681	3.21716	5.2019	7.53861	6.37026	3.41605	4.17446	3.79526	7.91726	5.63807	6.77766	10.6702	5.67663	8.17342
chr1	16241212	16241398	-	ENSG00000233929	MT1XP1	processed_pseudogene	other	stage_specific	25.811	18.3831	22.097	3.13009	2.38352	2.7568	1.87179	0.892355	1.38207	0	1.9818	0.9909	4.70003	4.92743	4.81373
chr1	16246838	16352454	-	ENSG00000037637	FBXO42	protein_coding	coding	constitutive	8.98344	8.96276	8.9731	9.37617	8.45869	8.91743	9.06693	9.2729	9.16991	10.2588	10.677	10.4679	12.77	11.2362	12.0031
chr1	16352574	16398145	+	ENSG00000055070	SZRD1	protein_coding	coding	constitutive	52.6529	36.54	44.5964	37.0096	49.7844	43.397	43.0687	33.0468	38.0577	51.0327	34.1523	42.5925	64.6111	39.6029	52.107
chr1	16387116	16437424	-	ENSG00000187144	SPATA21	protein_coding	coding	never	0.0419206	0.101806	0.0718633	0.13805	0.0726917	0.105371	0.0592807	0.02233	0.0408053	0.0165005	0.102615	0.0595577	0.0882091	0.0820433	0.0851262
chr1	16369149	16369530	-	ENSG00000226457	RP11-430L17.1	processed_pseudogene	other	never	0.0938042	0.0510893	0.0724468	0.0197177	0	0.00985885	0.265301	0.95562	0.61046	0.138728	0.608603	0.373665	0.148037	0.0581997	0.103118
chr1	16440671	16460078	+	ENSG00000157191	NECAP2	protein_coding	coding	constitutive	11.1642	10.3146	10.7394	21.8474	28.4244	25.1359	20.2414	19.2241	19.7327	30.46	26.0128	28.2364	23.5798	21.4961	22.5379
chr1	16460947	16468481	+	ENSG00000226029	RP4-798A10.2	lincRNA	lncRNA	never	0.0523221	0.0712414	0.0617818	0.11878	0.100499	0.10964	0.113451	0.181856	0.147653	0.70376	0.881506	0.792633	0.14863	0.220746	0.184688
chr1	16467435	16499257	-	ENSG00000080947	CROCCP3	transcribed_unprocessed_pseudogene	other	constitutive	4.59158	7.9402	6.26589	13.4556	13.8036	13.6296	13.2559	9.88203	11.569	13.0392	9.92119	11.4802	15.2847	10.8813	13.083
chr1	16514121	16514285	-	ENSG00000206652	RNU1-1	snRNA	other	constitutive	9.91357	26.1595	18.0365	14.9263	15.6057	15.266	66.5276	10.7159	38.6217	29.4122	19.9668	24.6895	11.7024	19.314	15.5082
chr1	16514644	16515754	+	ENSG00000261135	RP4-798A10.7	lincRNA	lncRNA	never	0.512505	0.757981	0.635243	0.746671	0.526856	0.636764	0.830261	0.612481	0.721371	0.96704	0.495684	0.731362	0.641469	0.630473	0.635971
chr1	16520693	16521796	+	ENSG00000224174	RP4-798A10.4	lincRNA	lncRNA	stage_specific	6.02885	5.7135	5.87118	4.1417	3.15385	3.64778	1.32804	1.2649	1.29647	0.602894	1.69545	1.14917	1.12943	1.47541	1.30242
chr1	16533885	16536172	-	ENSG00000233421	RP5-875O13.1	lincRNA	lncRNA	never	0.148187	0.376844	0.262516	0.171542	0.11408	0.142811	0.314925	0.201056	0.257991	1.0814	0.571643	0.826522	0.0546739	0.0300213	0.0423476
chr1	16534080	16534224	-	ENSG00000277344	RNU1-6P	snRNA	other	never	0	0	0	0	0	0	0	0	0	0	0	0	0	0	0
chr1	16539065	16539575	+	ENSG00000268991	FAM231B	protein_coding	coding	never	0	0.0435124	0.0217562	0	0	0	0.0251061	0	0.012553	0	0.031898	0.015949	0	0	0
chr1	16548650	16552531	-	ENSG00000225710	RP5-875O13.6	unprocessed_pseudogene	other	never	0	0.0580538	0.0290269	0.0647273	0.0710899	0.0679086	0.0446617	0.0283893	0.0365255	0.0467081	0.0945735	0.0706408	0.0124605	0.0244939	0.0184772
chr1	16562318	16613562	-	ENSG00000219481	NBPF1	protein_coding	coding	constitutive	7.71416	6.31313	7.01365	8.21661	7.24322	7.72992	12.3405	15.174	13.7573	20.0364	21.7785	20.9075	25.1384	22.7457	23.942
chr1	16617390	16617729	+	ENSG00000271732	RP5-1182A14.5	lincRNA	lncRNA	never	0.123802	0.0674272	0.0956146	0	0	0	0	0	0	0	0.444866	0.222433	0	0	0
chr1	16618968	16644683	-	ENSG00000215908	CROCCP2	transcribed_unprocessed_pseudogene	other	constitutive	3.69997	5.24831	4.47414	7.87168	6.74011	7.30589	9.17561	6.73627	7.95594	8.74875	8.0364	8.39258	9.74056	6.54542	8.14299
chr1	16645621	16650289	+	ENSG00000186301	MST1P2	unprocessed_pseudogene	other	de_restricted	0.157753	0.52313	0.340442	2.03531	1.48297	1.75914	1.98614	0.941535	1.46384	1.62183	0.875057	1.24844	1.03498	0.971655	1.00332
chr1	16656878	16667524	+	ENSG00000282143	RP1-163M9.8	lincRNA	lncRNA	never	0.100557	0.172635	0.136596	0.0716821	0.0419885	0.0568353	0.103043	0.0314397	0.0672414	0.258634	0.117827	0.18823	0.0758967	0.0759521	0.0759244
chr1	16666784	16666948	-	ENSG00000207513	RNU1-3	snRNA	other	constitutive	9.91357	26.7979	18.3557	15.1537	15.6057	15.3797	68.3126	12.6429	40.4778	30.3011	23.8545	27.0778	12.2715	21.8872	17.0794
chr1	16673002	16673512	+	ENSG00000237847	FAM231A	protein_coding	coding	never	0	0.00966942	0.00483471	0.0223912	0	0.0111956	0.0239106	0	0.0119553	0	0.00455686	0.00227843	0.0140091	0	0.00700455
chr1	16681096	16688749	-	ENSG00000280114	RP5-875O13.7	unprocessed_pseudogene	other	never	0.0785603	0.496869	0.287715	0.0846205	0.0180499	0.0513352	0.279842	0.167774	0.223808	0.138381	0.144111	0.141246	0.0456791	0.118885	0.082282
chr1	16687338	16720157	-	ENSG00000268869	ESPNP	transcribed_unprocessed_pseudogene	other	never	0.410608	1.81317	1.11189	0.405445	0.221861	0.313653	1.52638	0.719776	1.12308	0.991961	0.507403	0.749682	0.368491	0.386347	0.377419
chr1	16701545	16705594	+	ENSG00000279151	RP1-163M9.7	lincRNA	lncRNA	never	0	0.0891032	0.0445516	0.0515834	0	0.0257917	0	0	0	0	0.0489898	0.0244949	0	0	0
chr1	16685620	16686055	-	ENSG00000236698	EIF1AXP1	processed_pseudogene	other	constitutive	46.1833	33.6883	39.9358	22.1061	29.181	25.6436	32.5453	39.1356	35.8404	28.0012	27.1544	27.5778	28.6725	30.4645	29.5685
chr1	16733950	16734461	-	ENSG00000279132	FAM231C	protein_coding	coding	never	0	0.00963708	0.00481854	0.0223163	0	0.0111582	0.0238306	0	0.0119153	0	0.00454162	0.00227081	0.0139622	0	0.0069811
chr1	16739937	16750589	-	ENSG00000282740	RP5-1182A14.7	lincRNA	lncRNA	never	0.126371	0.229026	0.177699	0.0714459	0.0418501	0.056648	0.102703	0.0783402	0.0905216	0.257782	0.133097	0.195439	0.0756466	0.0838127	0.0797296
chr1	16740272	16972979	+	ENSG00000058453	CROCC	protein_coding	coding	constitutive	15.9558	23.7482	19.852	20.0129	15.8329	17.9229	18.4484	14.9959	16.7221	17.7838	14.0556	15.9197	17.1947	9.96119	13.5779
chr1	16740279	16750968	+	ENSG00000227684	CROCCP4	transcribed_unprocessed_pseudogene	other	never	0.615513	1.00053	0.808021	0.546707	0.369457	0.458082	0.556174	0.63082	0.593497	0.7603	0.588647	0.674473	0.426433	0.528843	0.477638
chr1	16740515	16740679	+	ENSG00000207389	RNU1-4	snRNA	other	constitutive	9.68817	26.3068	17.9975	14.3293	15.3893	14.8593	67.9422	13.0031	40.4727	28.4862	21.8146	25.1504	12.1806	20.3551	16.2678
chr1	16754909	16770237	-	ENSG00000186715	MST1L	transcribed_unprocessed_pseudogene	other	stage_specific	0.229768	1.14042	0.685094	3.97811	2.67439	3.32625	3.59031	2.22594	2.90813	3.33402	2.10098	2.7175	3.13596	3.3814	3.25868
chr1	16851256	16853129	-	ENSG00000223643	RP11-108M9.1	lincRNA	lncRNA	never	0	0.0330546	0.0165273	0	0	0	0.0286081	0	0.0143041	0.0448783	0	0.0224392	0	0	0
chr1	16855406	16859284	+	ENSG00000230239	RP11-108M9.2	lincRNA	lncRNA	never	0	0.0344023	0.0172011	0	0.014218	0.007109	0.0297745	0	0.0148872	0	0.028372	0.014186	0	0.0146964	0.0073482
chr1	16858948	16859021	-	ENSG00000263811	MIR3675	miRNA	other	never	0	0	0	0	0	0	0	0	0	0	0	0	0	0	0
chr1	16870944	16874092	+	ENSG00000228549	RP11-108M9.3	lincRNA	lncRNA	never	0.14045	0.617939	0.379194	0.423699	0.335775	0.379737	0.390734	0.230078	0.310406	0.99461	0.6067	0.800655	0.0899553	0.081301	0.0856282
chr1	16873707	16873851	+	ENSG00000277234	RNU1-5P	snRNA	other	never	3.64875	3.23e-07	1.82438	0	0	0	0	0	0	4.26e-67	0	2.13e-67	0	0	0
chr1	16888537	16889649	-	ENSG00000238142	RP11-108M9.4	lincRNA	lncRNA	constitutive	24.0799	29.7556	26.9178	23.9875	17.6185	20.803	10.0597	10.2625	10.1611	5.05147	6.74317	5.89732	6.76112	9.40957	8.08535
chr1	16889094	16889602	+	ENSG00000235241	RP11-108M9.5	processed_pseudogene	other	pp1_restricted	0.107243	0.0292043	0.0682236	0.0338138	0	0.0169069	0	0.0321332	0.0160666	2.3414	1.29457	1.81798	0.0423114	0.0665377	0.0544246
chr1	16895979	16896143	+	ENSG00000207005	RNU1-2	snRNA	other	constitutive	9.68817	26.3068	17.9975	14.3293	15.3893	14.8593	67.9422	13.0031	40.4727	28.4862	21.8146	25.1504	12.1806	20.3551	16.2678
chr1	16904338	16904776	-	ENSG00000272426	RP11-108M9.6	lincRNA	lncRNA	never	0.0702341	0.267765	0.169	0.0885793	0	0.0442896	0.331064	0.126265	0.228664	0.20774	0.546816	0.377278	0.332519	0.261455	0.296987
chr1	16974501	16980835	-	ENSG00000117122	MFAP2	protein_coding	coding	constitutive	73.9421	54.8185	64.3803	115.494	121.344	118.419	181.258	142.383	161.821	171.105	113.273	142.189	158.352	101.888	130.12
chr1	16978925	17005091	+	ENSG00000226526	RP1-37C10.3	antisense	lncRNA	never	0.149727	0.101934	0.125831	0.212441	0.0449363	0.128689	0	0.0448626	0.0224313	0.0601147	0.0488776	0.0544962	0.0590729	0.0464482	0.0527606
chr1	16985957	17011928	-	ENSG00000159363	ATP13A2	protein_coding	coding	constitutive	50.1156	49.8384	49.977	37.976	47.0936	42.5348	41.2029	34.0286	37.6157	40.2097	28.3912	34.3004	62.7937	30.1222	46.4579
chr1	17018721	17054170	-	ENSG00000117118	SDHB	protein_coding	coding	constitutive	105.842	96.388	101.115	61.2532	89.4366	75.3449	47.603	43.5951	45.599	68.3174	60.0947	64.2061	58.5263	60.6955	59.6109
chr1	17066760	17119435	-	ENSG00000117115	PADI2	protein_coding	coding	es_restricted	1.41908	2.02294	1.72101	0.501962	0.625453	0.563708	0.329452	0.306413	0.317933	0.68961	0.349409	0.519509	0.229861	0.099385	0.164623
chr1	17189782	17197617	+	ENSG00000204362	RP11-380J14.1	lincRNA	lncRNA	never	0.00355493	0	0.00177746	0	0	0	0	0	0	0	0	0	0	0	0
chr1	17193231	17201733	-	ENSG00000282843	RP11-380J14.4	lincRNA	lncRNA	never	0	0	0	0	0	0	0	0	0	0	0	0	0	0	0
chr1	17205125	17246005	+	ENSG00000142623	PADI1	protein_coding	coding	never	0.0655046	0.118701	0.0921028	0	0	0	0	0.00979708	0.00489854	0.00645824	0.00523059	0.00584442	0	0	0
chr1	17249097	17284233	+	ENSG00000142619	PADI3	protein_coding	coding	never	0.58637	0.641621	0.613996	0.124376	0.0959903	0.110183	0.0753815	0.156527	0.115954	0.0315342	0.0191549	0.0253446	0.00841253	0.00661466	0.00751359
chr1	17277888	17277975	+	ENSG00000266634	MIR3972	miRNA	other	never	0	0	0	0	0	0	0	0	0	0	0	0	0	0	0
chr1	17308194	17364004	+	ENSG00000159339	PADI4	protein_coding	coding	never	0.0608897	0.065695	0.0632923	0	0	0	0	0.00462768	0.00231384	0	0.00924973	0.00462486	0	0	0
chr1	17329011	17331796	-	ENSG00000280226	AC004824.1	protein_coding	coding	never	0.924608	0	0.462304	0	0	0	0	0	0	0	0.553742	0.276871	0	0	0
chr1	17372195	17401699	+	ENSG00000276747	PADI6	protein_coding	coding	never	0	0	0	0	0	0	0	0	0	0	0.0130551	0.00652755	0	0	0
chr1	17406759	17407382	+	ENSG00000227751	RP1-20B21.4	antisense	lncRNA	pp1_restricted	1.24546	0.932697	1.08908	0.883563	0.37379	0.628676	0.733847	0	0.366924	20.2572	30.7801	25.5187	0.614226	0.289775	0.452001
chr1	17406759	17439724	-	ENSG00000179051	RCC2	protein_coding	coding	constitutive	207.972	155.066	181.519	105.578	118.038	111.808	96.5003	80.1445	88.3224	64.9203	46.4206	55.6705	92.3173	59.8314	76.0743
chr1	17539834	17697874	+	ENSG00000074964	ARHGEF10L	protein_coding	coding	stage_specific	11.651	11.6115	11.6312	0.765314	0.873772	0.819543	5.67943	4.77986	5.22964	7.43716	5.16952	6.30334	6.29396	4.12493	5.20944
chr1	17717686	17749978	+	ENSG00000236648	RP11-473A10.2	lincRNA	lncRNA	never	0	0	0	0	0	0	0	0	0	0	0	0	0	0	0
chr1	17755312	17827063	+	ENSG00000117148	ACTL8	protein_coding	coding	never	0.27909	0.112511	0.1958	0	0.0261324	0.0130662	0.0102605	0.00576728	0.00801389	0	0	0	0	0.00675265	0.00337632
chr1	18065656	18074412	+	ENSG00000261781	RP11-174G17.2	lincRNA	lncRNA	never	0	0	0	0	0	0	0	0	0	0	0	0	0	0	0
chr1	18107745	18378483	+	ENSG00000117154	IGSF21	protein_coding	coding	stage_specific	8.45738	10.3277	9.39254	0.777914	0.61448	0.696197	37.8428	26.4193	32.1311	14.6802	13.4994	14.0898	4.66835	3.53002	4.09919
chr1	18109388	18115861	+	ENSG00000280222	RP11-174G17.3	TEC	lncRNA	never	0.0354844	0.0676415	0.051563	0	0	0	0.0597372	0.157964	0.108851	0.041233	0.124472	0.0828525	0.0139999	0.0314513	0.0227256
chr1	18166928	18179346	-	ENSG00000230035	RP11-174G17	antisense	lncRNA	never	0	0	0	0	0	0	0	0	0	0	0.0436061	0.0218031	0	0	0
chr1	18385828	18388514	+	ENSG00000225387	RP11-422P22.1	lincRNA	lncRNA	never	0.512005	0.433778	0.472892	0.0358746	0	0.0179373	0.0536323	0	0.0268162	0	0	0	0	0	0
chr1	18480981	18486126	+	ENSG00000179023	KLHDC7A	protein_coding	coding	stage_specific	3.09148	2.78404	2.93776	1.24354	1.41345	1.32849	0.503438	0.206273	0.354855	0.142727	0.0828441	0.112786	0.416298	0.335314	0.375806
chr1	18513117	18513383	+	ENSG00000235282	DYNLL1P3	processed_pseudogene	other	never	0	0	0	0	0	0	0	0	0	0	0	0	0	0	0
chr1	18595413	18595636	+	ENSG00000225478	RP1-8B22.2	processed_pseudogene	other	never	0	0	0	0	0	0	0	0	0	0	0	0	0	0	0
chr1	18631005	18748866	+	ENSG00000009709	PAX7	protein_coding	coding	never	0	0.0178506	0.0089253	0.183389	0.150895	0.167142	0	0.00178553	0.000892765	0.00881304	0	0.00440652	0	0.00184864	0.00092432
chr1	18839598	18859682	-	ENSG00000179002	TAS1R2	protein_coding	coding	never	0	0	0	0	0	0	0	6.44e-81	3.2206e-81	0	0.004079	0.0020395	2.2e-57	1.24e-55	6.33307e-56
chr1	18849272	18921121	-	ENSG00000255275	RP13-279N23.2	protein_coding	coding	never	0.00827504	0.0191599	0.0137175	8.23e-71	0.0109684	0.0054842	2.31e-82	0.020684	0.010342	5.74e-196	0.0138148	0.0069074	0.00691273	0.00936063	0.00813668
chr1	18871429	18902781	-	ENSG00000159423	ALDH4A1	protein_coding	coding	constitutive	20.7033	22.4094	21.5563	8.31695	8.38016	8.34855	10.4709	10.7036	10.5872	16.4761	12.9084	14.6922	17.8585	11.2409	14.5497
chr1	18904280	18956686	-	ENSG00000169991	IFFO2	protein_coding	coding	stage_specific	4.08899	3.79069	3.93984	1.52648	1.70879	1.61763	1.41375	0.792819	1.10328	7.83353	7.3903	7.61191	8.67354	6.44309	7.55832
chr1	18883201	18883275	-	ENSG00000265606	MIR4695	miRNA	other	never	0	0	0	0	0	0	0	0	0	0	0	0	0	0	0
chr1	18897070	18897148	-	ENSG00000221662	MIR1290	miRNA	other	never	0	0	0	0	0	0	0	0	0	0	0	0	0	0	0
chr1	19072109	19075511	-	ENSG00000272084	RP5-1126H10.2	3prime_overlapping_ncRNA	lncRNA	never	0.264804	0.134816	0.19981	0.0915006	0.0874599	0.0894802	0.125101	0.112816	0.118958	0.279783	0.376644	0.328213	0.43802	0.388569	0.413295
chr1	19074505	19210276	-	ENSG00000127481	UBR4	protein_coding	coding	constitutive	45.2075	48.5756	46.8916	41.5749	38.2847	39.9298	49.4999	38.6628	44.0814	56.8844	60.3399	58.6121	69.6488	53.2813	61.465
chr1	19210500	19240704	+	ENSG00000230424	RP1-43E13.2	antisense	lncRNA	pp2_restricted	0.269017	0.17582	0.222418	0.474998	0.516721	0.49586	0.608675	0.677085	0.64288	0.797384	0.550469	0.673926	1.99538	1.13498	1.56518
chr1	19251538	19260128	+	ENSG00000053372	MRTO4	protein_coding	coding	constitutive	38.5605	21.2995	29.93	11.692	21.4913	16.5917	20.0314	16.0589	18.0451	13.215	9.9956	11.6053	17.5766	12.0314	14.804
chr1	19215663	19251552	-	ENSG00000127463	EMC1	protein_coding	coding	constitutive	47.7589	35.0536	41.4062	27.362	42.878	35.12	66.8135	39.1782	52.9958	39.5905	26.9451	33.2678	44.4174	29.9421	37.1797
chr1	19265981	19274194	-	ENSG00000211454	AKR7L	polymorphic_pseudogene	other	never	0.307965	0.402707	0.355336	0.374369	0.351697	0.363033	0.561433	0.673844	0.617638	0.754753	1.0002	0.877476	0.874785	0.619071	0.746928
chr1	19282557	19289250	-	ENSG00000162482	AKR7A3	protein_coding	coding	never	0.331941	0.457738	0.39484	0.305076	0.368815	0.336946	0.720751	0.627439	0.674095	1.00271	0.921023	0.961866	0.939031	0.576218	0.757625
chr1	19297079	19297903	+	ENSG00000270728	RP4-657E11.10	processed_pseudogene	other	pp1_restricted	0.0507087	0	0.0253544	0.0319769	0	0.0159885	0.0478054	0	0.0239027	2.02483	3.79614	2.91048	0	0.0314616	0.0157308
chr1	19303964	19312146	-	ENSG00000053371	AKR7A2	protein_coding	coding	constitutive	35.8887	27.8275	31.8581	23.8026	34.052	28.9273	33.0511	28.5933	30.8222	45.5466	32.4165	38.9815	40.6598	28.2895	34.4746
chr1	19305075	19305182	-	ENSG00000200403	RNU6-1099P	snRNA	other	never	0	0	0	0	0	0	75.078	0	37.539	58.8885	0	29.4443	31.4199	0	15.7099
chr1	19312325	19329300	+	ENSG00000040487	PQLC2	protein_coding	coding	constitutive	8.20756	6.57189	7.38973	6.89983	8.79409	7.84696	9.83931	5.69432	7.76682	12.1455	10.3807	11.2631	14.8707	9.07664	11.9737
chr1	19338775	19485539	-	ENSG00000077549	CAPZB	protein_coding	coding	constitutive	177.553	175.942	176.748	166.666	164.39	165.528	134.101	115.97	125.035	150.74	134.292	142.516	147.348	121.503	134.425
chr1	19424383	19424671	+	ENSG00000240490	RN7SL277P	misc_RNA	other	never	0	0	0	0	0	0	0	0	0	0	0.699284	0.349642	0	0	0
chr1	19510592	19510733	+	ENSG00000201609	RNU4-28P	snRNA	other	never	0	0	0	0	0	0	0	0	0	0	0	0	0	0	0
chr1	19591801	19596832	-	ENSG00000235185	RP5-1056L3.1	antisense	lncRNA	never	0	0	0	0	0	0	0	0	0	0	0	0	0	0	0
chr1	19596976	19629821	+	ENSG00000173436	MINOS1	protein_coding	coding	constitutive	121.453	63.4543	92.4536	66.6439	106.9	86.772	42.2285	40.363	41.2957	88.935	88.9608	88.9479	86.1101	92.7019	89.406
chr1	19596978	19658056	+	ENSG00000270136	MINOS1-NBL1	protein_coding	coding	never	4.97e-08	0.346993	0.173497	0.0401912	0.135587	0.0878891	8.9e-11	1.98e-05	9.87574e-06	4.67e-16	0.0295408	0.0147704	0.000286423	0.0389178	0.0196021
chr1	19640553	19658456	+	ENSG00000158747	NBL1	protein_coding	coding	stage_specific	8.41574	6.10421	7.25997	51.0316	62.7074	56.8695	1.33772	0.512443	0.925082	10.5041	9.09086	9.79748	15.3632	8.23659	11.7999
chr1	19608113	19608568	+	ENSG00000226396	RP5-1056L3.3	processed_pseudogene	other	stage_specific	1.09954	1.77284	1.43619	2.02863	0.980189	1.50441	2.06292	2.65848	2.3607	1.96424	1.92011	1.94217	1.99725	2.52616	2.26171
chr1	19665286	19679562	+	ENSG00000158748	HTR6	protein_coding	coding	never	0.349272	1.26818	0.808726	0.0112949	0.0215024	0.0163987	0.00844295	0.0107336	0.00958828	0.0132447	0.0160905	0.0146676	0.0141334	0.0166694	0.0154014
chr1	19682212	19799945	-	ENSG00000162542	TMCO4	protein_coding	coding	stage_specific	1.5471	1.48769	1.5174	1.11297	1.08799	1.10048	1.58314	0.980443	1.28179	3.21904	2.58028	2.89966	3.75085	3.06518	3.40801
chr1	19814028	19815278	-	ENSG00000178828	RNF186	protein_coding	coding	never	0	0	0	0	0	0	0	0	0	0	1.94e-08	9.68e-09	0.0361921	0.0284574	0.0323247
chr1	19814366	19819502	+	ENSG00000235434	RP11-91K11.2	antisense	lncRNA	never	0	0	0	0	0	0	0	0	0	0	0.0404514	0.0202257	0	0	0
chr1	19882512	19912945	+	ENSG00000169914	OTUD3	protein_coding	coding	constitutive	2.59923	7.59787	5.09855	5.97964	3.07976	4.5297	5.88569	6.80653	6.34611	3.5795	5.78848	4.68399	6.12351	6.61916	6.37134
chr1	19920008	19923617	-	ENSG00000188784	PLA2G2E	protein_coding	coding	never	0	0	0	0	0	0	0	0	0	0	0	0	0	0	0
chr1	19970968	19971269	+	ENSG00000242688	RN7SL304P	misc_RNA	other	never	0	0	0	0	0	0	0	0	0	0	0	0	0	0	0
chr1	19975430	19980416	-	ENSG00000188257	PLA2G2A	protein_coding	coding	never	0.597909	0.677557	0.637733	0	0	0	0	0.0577235	0.0288617	0	0	0	0.0239439	0.0308022	0.027373
chr1	20028178	20091190	+	ENSG00000127472	PLA2G5	protein_coding	coding	never	0.0517005	0.0683045	0.0600025	0	0	0	0	0	0	0	0	0	0	0	0
chr1	20111938	20119566	-	ENSG00000117215	PLA2G2D	protein_coding	coding	never	0	0.00351343	0.00175672	0	0	0	0	0	0	0	0	0	0	0	0
chr1	20139325	20150386	+	ENSG00000158786	PLA2G2F	protein_coding	coding	never	0	0	0	0	0	0	0	0	0	0	0	0	0	0	0
chr1	20154337	20160568	+	ENSG00000227066	RP3-340N1.2	lincRNA	lncRNA	never	0	0	0	0	0	0	0	0	0	0	0	0	0	0	0
chr1	20161252	20177424	-	ENSG00000187980	PLA2G2C	protein_coding	coding	never	0	0	0	0.00329509	0.00627292	0.00478401	0.00492615	0	0.00246307	0	0.00312941	0.00156471	0	0.00324199	0.001621
chr1	20184241	20186486	-	ENSG00000225986	UBXN10-AS1	antisense	lncRNA	never	0	0.0870248	0.0435124	0.570976	0.191819	0.381398	0.150637	0	0.0753185	0.393847	0.15949	0.276668	0.0840547	0.0660911	0.0750729
chr1	20186084	20196048	+	ENSG00000162543	UBXN10	protein_coding	coding	pp1_restricted	0.151022	0.201599	0.176311	0.49298	0.433698	0.463339	0.505293	0.333613	0.419453	3.89765	3.54868	3.72316	0.890252	0.801042	0.845647
chr1	20243094	20244655	+	ENSG00000228105	RP3-340N1.6	lincRNA	lncRNA	never	0	0	0	0	0	0	0	0	0	0	0	0	0	0	0
chr1	20290918	20354894	+	ENSG00000158816	VWA5B1	protein_coding	coding	pp1_restricted	0.093996	0.272742	0.183369	0	0.0162651	0.00813255	0.0906516	0.0406066	0.0656291	1.77755	2.58884	2.18319	0.0929947	0.0678469	0.0804208
chr1	20294210	20323187	-	ENSG00000226664	RP4-745E8.2	antisense	lncRNA	never	0	0	0	0	0	0	0	0	0	0	0	0	0	0	0
chr1	20360578	20431234	-	ENSG00000236963	LINC01141	lincRNA	lncRNA	never	0	0.00310788	0.00155394	0.0396111	0	0.0198056	0	0	0	0.00843918	0	0.00421959	0	0.00708086	0.00354043
chr1	20412303	20413253	-	ENSG00000226487	RP4-749H3.2	lincRNA	lncRNA	never	0	0	0	0	0	0	0	0	0	0	0	0	0	0	0
chr1	20482390	20486220	-	ENSG00000162545	CAMK2N1	protein_coding	coding	stage_specific	1.30801	1.57212	1.44006	1.35362	0.60095	0.977285	11.9058	10.678	11.2919	26.7211	25.3003	26.0107	31.0106	33.7586	32.3846
chr1	20499447	20508161	-	ENSG00000090432	MUL1	protein_coding	coding	constitutive	10.0449	8.60424	9.32457	7.40429	8.13048	7.76738	9.16064	7.96334	8.56199	10.7331	9.01308	9.87309	13.3828	10.9363	12.1595
chr1	20525988	20526751	+	ENSG00000215520	RPS4XP4	processed_pseudogene	other	never	0	0	0	0	0	0	0	0	0	0.0425975	0.0172501	0.0299238	0	0	0
chr1	20552438	20555010	+	ENSG00000183114	FAM43B	protein_coding	coding	never	0.98175	1.24152	1.11163	0.0890475	0.0322898	0.0606686	0.00633932	0.0040296	0.00518446	0.059668	0.0402715	0.0499698	0.180403	0.175225	0.177814
chr1	20588947	20618908	+	ENSG00000158825	CDA	protein_coding	coding	stage_specific	18.807	19.9523	19.3797	41.7683	48.41	45.0891	1.05828	1.50895	1.28361	0.511113	0.171327	0.34122	0.204921	0.138965	0.171943
chr1	20633454	20651511	+	ENSG00000158828	PINK1	protein_coding	coding	constitutive	28.7782	31.3654	30.0718	18.8204	22.5681	20.6943	8.17361	6.63013	7.40187	22.3689	16.729	19.549	21.486	16.9566	19.2213
chr1	20642656	20652193	-	ENSG00000117242	PINK1-AS	antisense	lncRNA	constitutive	1.5996	1.56461	1.58211	1.79387	1.84765	1.82076	2.97231	3.07738	3.02485	3.00011	3.1052	3.05266	4.48464	4.00886	4.24675
chr1	20651766	20661544	-	ENSG00000244038	DDOST	protein_coding	coding	constitutive	131.485	107.627	119.556	114.509	133.939	124.224	153.623	120.098	136.861	115.104	84.6739	99.8889	127.489	90.9087	109.199
chr1	20664013	20718017	-	ENSG00000117245	KIF17	protein_coding	coding	stage_specific	4.32987	8.96147	6.64567	4.63611	2.60683	3.62147	2.85023	2.40049	2.62536	1.7224	2.44267	2.08254	0.625624	0.553896	0.58976
chr1	20692733	20694013	-	ENSG00000235432	RP5-930J4.5	unprocessed_pseudogene	other	never	0	0	0	0.0749745	0	0.0374872	0	0.106872	0.053436	0	0	0	0	0	0
chr1	20719731	20732837	-	ENSG00000189410	SH2D5	protein_coding	coding	es_restricted	4.46357	5.2373	4.85044	0.629629	0.938984	0.784307	1.16001	0.589088	0.874549	0.182745	0.413704	0.298225	0.440066	0.274574	0.35732
chr1	20732879	20733952	+	ENSG00000233069	RP5-930J4.2	antisense	lncRNA	never	0	0	0	0	0	0	0	0	0	0	0	0	0	0	0
chr1	20742660	20787323	-	ENSG00000127483	HP1BP3	protein_coding	coding	constitutive	58.1276	51.4091	54.7683	69.6144	66.56	68.0872	125.393	114.622	120.007	104.245	99.7113	101.978	131.28	129.692	130.486
chr1	20806291	21176888	-	ENSG00000075151	EIF4G3	protein_coding	coding	constitutive	34.1277	36.2379	35.1828	33.3998	33.3488	33.3743	34.864	33.1843	34.0241	38.1573	34.6442	36.4008	41.1012	37.7042	39.4027
chr1	20841240	20841302	+	ENSG00000251914	RNU7-200P	snRNA	other	never	0	0	0	0	0	0	0	0	0	0	0	0	0	0	0
chr1	20988313	20988432	-	ENSG00000221808	MIR1256	miRNA	other	never	0	0	0	0	0	0	0	8.22182	4.11091	0	0	0	0	0	0
chr1	21003549	21003934	-	ENSG00000233072	RPS15AP6	processed_pseudogene	other	never	0.0916593	0.249605	0.170632	0.289002	0.110036	0.199519	0.432057	0.604203	0.51813	0.406668	0.878306	0.642487	0.289304	0.682427	0.485866
chr1	21073638	21073753	-	ENSG00000236073	RP11-487E1.2	processed_pseudogene	other	never	0	0	0	0	0	0	0	11.128	5.564	0	11.1213	5.56065	0	34.564	17.282
chr1	21161474	21162081	+	ENSG00000235112	HSPE1P27	processed_pseudogene	other	never	0	0	0	0	0	0	0	0	0	0.530463	1.28888	0.909671	0	0	0
chr1	21217246	21345504	-	ENSG00000117298	ECE1	protein_coding	coding	constitutive	12.1474	16.4973	14.3224	30.431	23.1812	26.8061	40.4929	33.8915	37.1922	28.2813	42.4011	35.3412	111.822	109.653	110.737
chr1	21293289	21299774	+	ENSG00000231105	RP5-1071N3.1	antisense	lncRNA	never	0.0350009	0.156315	0.095658	0.172158	0.0756325	0.123895	0.0461957	0.0629237	0.0545597	0.124232	0.148644	0.136438	0.0607602	0.0477749	0.0542675
chr1	21266081	21267251	+	ENSG00000236936	RP3-329E20.2	antisense	lncRNA	never	0	0	0	0	0	0	0	0	0	0.0459324	0.167405	0.106669	0.122536	0.154157	0.138347
chr1	21397986	21398362	+	ENSG00000236216	PPP1R11P1	processed_pseudogene	other	never	0	0.105252	0.052626	0.121864	0.115997	0.11893	0.182186	0.289518	0.235852	0.142901	0.202539	0.17272	0.495589	0.2398	0.367694
chr1	21411459	21413293	-	ENSG00000228823	RP11-293F5.8	unprocessed_pseudogene	other	never	0	0	0	0	0	0	0	0	0	0	0	0	0	0	0
chr1	21415897	21417492	+	ENSG00000236009	RP11-293F5.1	lincRNA	lncRNA	never	0.0201417	0.0769295	0.0485356	0.0635995	0.0241798	0.0438897	0.012659	0.0644733	0.0385662	0.0297878	0.0483009	0.0390443	0.0476798	0.0333244	0.0405021
chr1	21424624	21427967	-	ENSG00000227001	NBPF2P	unprocessed_pseudogene	other	never	0.300453	0.279147	0.2898	0.378931	0.381906	0.380418	0.399883	0.466009	0.432946	0.339792	0.29637	0.318081	0.404429	0.339928	0.372179
chr1	21428302	21429536	+	ENSG00000187952	HS6ST1P1	processed_pseudogene	other	constitutive	4.05028	3.39277	3.72153	15.2618	16.9389	16.1003	5.90203	4.00754	4.95479	5.54029	3.85863	4.69946	9.57668	4.89825	7.23747
chr1	21434317	21437558	+	ENSG00000186543	CROCCP5	unprocessed_pseudogene	other	never	0.0256803	0.139865	0.0827727	0.016194	0.0616577	0.0389258	0.04842	0.0307783	0.0395991	0	0	0	0.0202637	0.015933	0.0180983
chr1	21440127	21485005	+	ENSG00000142794	NBPF3	protein_coding	coding	constitutive	4.77824	6.87174	5.82499	7.93425	8.12794	8.0311	6.86777	8.79392	7.83085	7.62876	5.20243	6.41559	6.48425	5.63189	6.05807
chr1	21459755	21460082	-	ENSG00000176378	PFN1P10	processed_pseudogene	other	never	0	0	0	0	0	0	0	0.162863	0.0814315	0.321288	0.481322	0.401305	0	0	0
chr1	21509371	21578412	+	ENSG00000162551	ALPL	protein_coding	coding	constitutive	54.4402	59.0824	56.7613	52.7312	59.4338	56.0825	66.1921	54.7364	60.4642	25.5584	12.0395	18.799	19.9465	11.2714	15.609
chr1	21586471	21591187	+	ENSG00000233431	RP11-63N8.3	antisense	lncRNA	never	0	0	0	0	0.062569	0.0312845	0.0245678	0.0156166	0.0200922	0	0.0468212	0.0234106	0	0.0161685	0.00808425
chr1	21596214	21669363	-	ENSG00000076864	RAP1GAP	protein_coding	coding	constitutive	2.75323	5.78421	4.26872	4.30411	3.42676	3.86544	2.1179	1.31201	1.71496	2.59825	4.24337	3.42081	14.1913	12.4939	13.3426
chr1	21678297	21783606	-	ENSG00000090686	USP48	protein_coding	coding	constitutive	48.5452	51.9521	50.2486	33.5533	33.0802	33.3167	24.5115	25.8709	25.1912	29.1763	27.9074	28.5419	28.1292	32.6697	30.3995
chr1	21768268	21768575	+	ENSG00000231978	RP11-132G19.3	processed_pseudogene	other	never	0	0	0	0	0	0	0	0	0	0	0.193373	0.0966865	0	0	0
chr1	21812264	21825221	+	ENSG00000187942	LDLRAD2	protein_coding	coding	never	0.441289	0.859726	0.650508	0.514856	0.274581	0.394719	0.699011	0.265273	0.482142	0.588562	0.919407	0.753984	0.888912	0.651008	0.76996
chr1	21822244	21937297	-	ENSG00000142798	HSPG2	protein_coding	coding	constitutive	15.8883	25.4003	20.6443	26.5092	28.6299	27.5695	77.1096	50.1276	63.6186	42.9613	34.4396	38.7004	117.585	69.595	93.59
chr1	21908097	21908580	+	ENSG00000232037	RP11-26H16.1	processed_pseudogene	other	never	0.0937107	0.0621685	0.0779396	0.0369338	0.0854924	0.0612131	0.106137	0.197205	0.151671	0.118379	0.202834	0.160607	0.0250884	0.125514	0.0753012
chr1	21950678	21956871	-	ENSG00000283234	RP11-26H16.4	transcribed_unitary_pseudogene	other	never	0	0.00911022	0.00455511	0	0	0	0	0.0100107	0.00500535	0	0	0	0.0198144	0.0155798	0.0176971
chr1	21977020	21998642	+	ENSG00000219073	CELA3B	protein_coding	coding	never	0	0.0581952	0.0290976	0	0	0	0	0	0	0.651021	0.396332	0.523676	0.265466	0.423437	0.344452
chr1	21987480	21987777	+	ENSG00000273610	RN7SL386P	misc_RNA	other	never	0	0	0	0.11198	0	0.05599	0	0	0	0	0.0531748	0.0265874	0.140121	0.0550877	0.0976044
chr1	21987815	21987919	+	ENSG00000201919	RNU6-1022P	snRNA	other	never	0	0	0	0	0	0	0	0	0	0	0	0	0	0	0
chr1	22001655	22012539	+	ENSG00000142789	CELA3A	protein_coding	coding	never	0	0	0	0	0	0	0	0	0	0.293223	0.376789	0.335006	0.626987	0.357394	0.49219
chr1	22010649	22010946	+	ENSG00000278124	RN7SL186P	misc_RNA	other	never	0	0	0	0	0	0	0	0	0	0	0.0531748	0.0265874	0.420363	0.275439	0.347901
chr1	22010984	22011088	+	ENSG00000201273	RNU6-776P	snRNA	other	never	0	0	0	0	0	0	0	0	0	0	0	0	0	0	0
chr1	22023989	22026048	-	ENSG00000228397	RP1-224A6.3	lincRNA	lncRNA	never	0.181402	0.15848	0.169941	0.163398	0.0704753	0.116937	0.030535	0.0388192	0.0346771	0.104382	0.0722615	0.0883218	0.0766728	0.0803825	0.0785277
chr1	22024530	22031225	+	ENSG00000218510	LINC00339	lincRNA	lncRNA	constitutive	11.562	16.4219	13.9919	9.04487	7.14933	8.0971	10.6596	11.1227	10.8911	11.7568	9.52393	10.6404	8.96464	7.49895	8.23179
chr1	22052626	22092946	+	ENSG00000070831	CDC42	protein_coding	coding	constitutive	90.9229	71.5818	81.2524	112.405	137.28	124.843	68.5332	76.0259	72.2796	130.263	99.4138	114.838	74.2956	92.5149	83.4052
chr1	22059196	22064199	+	ENSG00000230068	CDC42-IT1	sense_intronic	lncRNA	never	0.0330643	0.288128	0.160596	0.312755	0.0793863	0.196071	0.0935136	0.406188	0.249851	0.244496	0.564356	0.404426	0.130451	0.430801	0.280626
chr1	22068339	22068827	-	ENSG00000271428	RP1-224A6.8	processed_pseudogene	other	never	0	0	0	0	0	0	0	0	0	0	0.998793	0.499397	0	0	0
chr1	22100612	22101360	+	ENSG00000271840	RP1-224A6.9	lincRNA	lncRNA	never	0	0.129011	0.0645055	0.0933586	0	0.0466793	0.139571	0.230668	0.185119	0.0437898	0.319192	0.181491	0.11682	0.312304	0.214562
chr1	22117304	22143969	-	ENSG00000162552	WNT4	protein_coding	coding	stage_specific	0.0873411	0.345011	0.216176	1.53276	1.4644	1.49858	0.155779	0.06042	0.1081	0.445888	0.432925	0.439406	1.21245	1.12141	1.16693
chr1	22266238	22266300	+	ENSG00000266564	MIR4418	miRNA	other	never	0	0	0	0	0	0	0	0	0	0	0	0	0	0	0
chr1	22322839	22323331	-	ENSG00000234397	RP11-415K20.1	processed_pseudogene	other	never	0	0.0141503	0.00707515	0.00397182	0	0.00198591	0	0.00424622	0.00212311	0	0.0377212	0.0188606	0.0198798	0.00703407	0.0134569
chr1	22364629	22366482	-	ENSG00000279625	RP11-415K20.2	TEC	lncRNA	never	0	0	0	0	0	0	0	0	0	0	0	0	0	0.00600004	0.00300002
chr1	22451850	22531157	+	ENSG00000184677	ZBTB40	protein_coding	coding	constitutive	3.70914	3.50886	3.609	8.52796	9.98975	9.25886	5.04651	5.00887	5.02769	6.72039	6.78925	6.75482	7.96008	6.42261	7.19135
chr1	22517473	22519708	+	ENSG00000237200	ZBTB40-IT1	sense_intronic	lncRNA	stage_specific	0.919196	1.50188	1.21054	2.17367	2.7587	2.46618	1.94978	1.10167	1.52572	2.37897	1.51388	1.94643	2.35727	1.99606	2.17666
chr1	22563563	22603594	+	ENSG00000070886	EPHA8	protein_coding	coding	stage_specific	2.24703	3.57766	2.91235	2.08949	1.82019	1.95484	0.651073	0.306674	0.478874	0.123021	0.173834	0.148427	0.805071	0.558446	0.681759
chr1	22633257	22633366	-	ENSG00000276835	MIR6127	miRNA	other	never	0	0	0	0	0	0	0	0	0	0	0	0	0	0	0
chr1	22636505	22639608	+	ENSG00000173372	C1QA	protein_coding	coding	never	0	0	0	0	0	0	0	0	0	0	0.0102088	0.0051044	0.0134507	0.0177095	0.0155801
chr1	22643629	22648110	+	ENSG00000159189	C1QC	protein_coding	coding	never	0	0	0	0	0	0	0	0	0	0	0	0	0	0.011226	0.005613
chr1	22652761	22661538	+	ENSG00000173369	C1QB	protein_coding	coding	never	0	0	0	0	0	0	0	0	0	0	0	0	0	0	0
chr1	22710838	22921500	+	ENSG00000133216	EPHB2	protein_coding	coding	constitutive	4.93471	5.4126	5.17366	13.9998	14.5523	14.276	74.3347	49.9078	62.1213	25.0233	20.6228	22.823	33.5823	19.1866	26.3845
chr1	22863158	22863226	-	ENSG00000264014	MIR4253	miRNA	other	never	0	0	0	0	0	0	0	0	0	0	0	0	0	0	0
chr1	22719516	22719598	+	ENSG00000265422	MIR4684	miRNA	other	never	0	0	0	0	0	0	0	0	0	0	0	0	0	0	0
chr1	22835712	22836849	-	ENSG00000225952	RP11-69E9.1	antisense	lncRNA	never	0	0	0	0	0	0	0	0	0	0.0875886	0.602981	0.345285	0	0	0
chr1	22953042	22965338	-	ENSG00000215906	LACTBL1	protein_coding	coding	never	0	0	0	0	0	0	0	0	0	0	0	0	0.00972145	0	0.00486072
chr1	23010833	23015850	-	ENSG00000227868	C1orf234	protein_coding	coding	never	0	0.116424	0.058212	0.149945	0	0.0749725	0	0.1281	0.06405	0.0879083	0.16003	0.123969	0.210138	0.0737627	0.14195
chr1	23019447	23083689	+	ENSG00000004487	KDM1A	protein_coding	coding	constitutive	121.074	98.1874	109.631	59.377	64.7283	62.0526	125.231	108.545	116.888	110.188	70.5206	90.3543	87.0365	67.5524	77.2944
chr1	23020146	23088058	-	ENSG00000240553	RP1-184J9.2	antisense	lncRNA	never	6.11e-108	6.34e-117	3.06e-108	5.95e-108	1.33e-104	6.65e-105	3.18e-79	7e-97	1.59147e-79	0.176436	0.0637934	0.120115	1.73e-55	7e-82	8.6535e-56
chr1	23084022	23177808	-	ENSG00000169641	LUZP1	protein_coding	coding	constitutive	13.7465	12.2691	13.0078	14.7591	14.6387	14.6989	15.4771	15.9597	15.7184	15.9697	18.0513	17.0105	13.0302	15.3929	14.2116
chr1	23044304	23044372	+	ENSG00000263793	MIR3115	miRNA	other	never	0	0	0	0	0	0	0	0	0	0	0	0	0	0	0
chr1	23057857	23057934	-	ENSG00000266802	MIR4419A	miRNA	other	never	0	0	0	0	0	0	0	0	0	0	0	0	0	0	0
chr1	23140324	23141142	+	ENSG00000229010	RP5-979D14.1	processed_pseudogene	other	never	0	0	0	0	0	0	0	0	0	0.309849	0.72148	0.515664	0.0206649	0	0.0103324
chr1	23162703	23162810	+	ENSG00000206935	RNU6-514P	snRNA	other	never	0	0	0	0	0	0	0	0	0	0	119.236	59.618	0	0	0
chr1	23163952	23164053	+	ENSG00000252578	RNU6-135P	snRNA	other	never	0	0	0	0	0	0	0	0	0	0	0	0	0	0	0
chr1	23191894	23194729	-	ENSG00000179546	HTR1D	protein_coding	coding	es_restricted	3.35174	2.04625	2.699	1.78169	0.827985	1.30484	0.450591	0.420565	0.435578	0.885806	1.74645	1.31613	0.20528	0.157655	0.181468
chr1	23244764	23245224	+	ENSG00000215381	RP5-1057J7.1	processed_pseudogene	other	never	0	0	0	0	0	0	0.0301689	0	0.0150844	0	0	0	0.0505025	0	0.0252512
chr1	23281308	23286752	-	ENSG00000261326	LINC01355	lincRNA	lncRNA	stage_specific	0.239615	0.840839	0.540227	1.66217	0.495202	1.07869	1.91583	5.04442	3.48013	1.68215	2.04357	1.86286	1.1847	2.53253	1.85861
chr1	23303770	23344336	-	ENSG00000125944	HNRNPR	protein_coding	coding	constitutive	112.624	62.8168	87.7204	71.3216	96.5846	83.9531	149.517	140.667	145.092	108.925	82.8023	95.8637	127.489	102.87	115.18
chr1	23359447	23369442	-	ENSG00000125945	ZNF436	protein_coding	coding	stage_specific	0.458953	0.281435	0.370194	3.09536	3.31579	3.20558	2.25807	2.68519	2.47163	4.37039	3.47854	3.92447	3.93429	3.90504	3.91967
chr1	23368996	23371839	+	ENSG00000249087	ZNF436-AS1	antisense	lncRNA	stage_specific	0.131996	0.233469	0.182732	7.61992	3.67998	5.64995	8.25998	8.76561	8.5128	5.91335	5.56074	5.73705	3.80923	3.54711	3.67817
chr1	23370253	23370346	-	ENSG00000201405	Y_RNA	misc_RNA	other	never	0	0	0	0	0	0	0	0	0	0	0	0	0	0	0
chr1	23378379	23379029	-	ENSG00000271420	RP5-1057J7.7	lincRNA	lncRNA	never	0	0	0	0.0456999	0	0.02285	0.0683212	0.086857	0.0775891	0.107177	0.282113	0.194645	0.142961	0.0899268	0.116444
chr1	23381060	23424740	-	ENSG00000204219	TCEA3	protein_coding	coding	stage_specific	0.0589104	0.0751447	0.0670276	1.05197	0.741987	0.896979	2.74655	2.48896	2.61775	2.55065	2.77091	2.66078	3.29204	3.4807	3.38637
chr1	23410831	23412146	+	ENSG00000232482	RP4-654C18.1	processed_pseudogene	other	never	0	0	0	0	0	0	0	0	0	0.109693	0.399786	0.25474	0	0	0
chr1	23428562	23484568	-	ENSG00000088280	ASAP3	protein_coding	coding	constitutive	17.6902	26.9136	22.3019	32.2488	26.3519	29.3004	24.7541	20.5467	22.6504	25.2974	19.4985	22.398	28.2861	17.74	23.013
chr1	23506429	23531220	-	ENSG00000007968	E2F2	protein_coding	coding	stage_specific	1.1387	1.35444	1.24657	0.445612	0.383736	0.414674	3.30117	2.2402	2.77068	0.885903	0.409452	0.647678	3.26164	1.90283	2.58223
chr1	23549138	23550915	-	ENSG00000235052	RP1-150O5.3	lincRNA	lncRNA	never	0.130103	0.212578	0.171341	0.369195	0.0780937	0.223644	0.613272	0.506776	0.560024	0.192412	0.194795	0.193604	0.256653	0.403606	0.33013
chr1	23557917	23559794	-	ENSG00000117318	ID3	protein_coding	coding	constitutive	30.7714	14.4276	22.5995	67.4859	82.7729	75.1294	276.903	298.605	287.754	52.8537	32.4687	42.6612	725.347	746.132	735.74
chr1	23581494	23640568	+	ENSG00000197880	MDS2	protein_coding	coding	never	0	0	0	0.04812	0.0364267	0.0422734	0	0.0457284	0.0228642	0	0	0	0.0153275	0	0.00766375
chr1	23670293	23680259	+	ENSG00000229239	RP11-223J15.2	unprocessed_pseudogene	other	never	0	0	0	0	0	0	0	0	0	0	0	0	0	0	0
chr1	23691778	23696425	+	ENSG00000142676	RPL11	protein_coding	coding	constitutive	1803.71	809.558	1306.63	1076.13	1880.03	1478.08	1745.64	1248.27	1496.95	1746.47	638.315	1192.39	792.75	538.357	665.553
chr1	23743154	23762059	+	ENSG00000011007	TCEB3	protein_coding	coding	constitutive	22.4148	13.6704	18.0426	11.217	12.3389	11.778	9.9825	10.8079	10.3952	11.1947	12.8692	12.032	13.7087	13.9767	13.8427
chr1	23760381	23778287	-	ENSG00000236810	TCEB3-AS1	antisense	lncRNA	constitutive	2.59943	3.16251	2.88097	3.48666	3.19708	3.34187	2.5946	2.82663	2.71062	5.0239	2.98961	4.00676	2.05436	2.2327	2.14353
chr1	23778404	23788232	+	ENSG00000057757	PITHD1	protein_coding	coding	constitutive	24.782	17.3099	21.046	14.4413	18.464	16.4526	19.8852	17.6715	18.7783	17.5159	15.7643	16.6401	18.7675	17.5773	18.1724
chr1	23790969	23795539	+	ENSG00000011009	LYPLA2	protein_coding	coding	constitutive	105.289	59.3982	82.3436	48.8373	94.3216	71.5794	96.6064	75.4159	86.0112	118.836	64.805	91.8205	94.6299	57.7451	76.1875
chr1	23795598	23800804	-	ENSG00000117308	GALE	protein_coding	coding	constitutive	20.5002	15.9581	18.2292	8.97561	14.5108	11.7432	14.6504	10.5131	12.5817	14.1448	11.4124	12.7786	24.9771	21.4371	23.2071
chr1	23801884	23838620	-	ENSG00000117305	HMGCL	protein_coding	coding	constitutive	10.3198	16.4969	13.4084	19.5696	16.5648	18.0672	18.5774	14.7077	16.6425	23.6789	20.0804	21.8797	20.9885	17.2699	19.1292
chr1	23845076	23868294	-	ENSG00000179163	FUCA1	protein_coding	coding	constitutive	4.23763	5.2471	4.74237	5.08273	4.49543	4.78908	6.06589	6.57143	6.31866	10.5261	10.8559	10.691	9.98363	9.12167	9.55265
chr1	23870525	23913362	-	ENSG00000188822	CNR2	protein_coding	coding	never	0	0	0	0.00198475	0	0.000992375	0	0	0	0	0.0151975	0.00759875	0.00496706	0.0058583	0.00541268
chr1	23901470	23902737	-	ENSG00000229106	BTBD6P1	processed_pseudogene	other	never	0.0150425	0.00819271	0.0116176	0	0.00902916	0.00451458	0	0.00901435	0.00450718	0	0.0135133	0.00675665	0.00593482	0.0139994	0.00996711
chr1	23907110	23907885	+	ENSG00000232557	RP11-4M23.3	antisense	lncRNA	never	0	0	0	0	0	0	0	0	0	0	0	0	0	0	0
chr1	23929069	23929147	+	ENSG00000264926	MIR378F	miRNA	other	never	0	0	0	0	0	0	0	0	0	0	0	0	0	0	0
chr1	23949015	23949383	-	ENSG00000230228	RP11-4M23.4	processed_pseudogene	other	never	0.0202987	0.0230322	0.0216654	0	0.163616	0.081808	0.096594	0.120194	0.108394	0.171543	0.119397	0.14547	0.0541534	0.00899579	0.0315746
chr1	23959108	23963462	+	ENSG00000189266	PNRC2	protein_coding	coding	constitutive	559.578	329.702	444.64	288.688	386.436	337.562	556.249	538.854	547.552	747.999	294.924	521.462	633.135	374.674	503.904
chr1	23964803	23980927	-	ENSG00000188529	SRSF10	protein_coding	coding	constitutive	92.6916	75.4168	84.0542	46.0928	60.8582	53.4755	82.3732	90.8979	86.6355	72.82	68.9671	70.8936	72.9581	82.4781	77.7181
chr1	24007880	24008519	-	ENSG00000215905	RP11-4M23.7	processed_pseudogene	other	never	0	0	0	0	0	0	0	0	0	0	0	0	0	0.0836345	0.0418173
chr1	24040834	24086799	+	ENSG00000225315	RP11-293P20.2	antisense	lncRNA	never	0	0	0	0	0	0	0	0	0	0	0	0	0.0517549	0	0.0258774
chr1	24066773	24083565	+	ENSG00000230703	RP11-293P20.4	antisense	lncRNA	never	0	0	0	0	0	0	0	0	0	0	0.0381766	0.0190883	0	0	0
chr1	24056034	24112175	-	ENSG00000142661	MYOM3	protein_coding	coding	never	0.0127798	0.031335	0.0220574	0.00807717	0	0.00403858	0.0263722	0.00767808	0.0170251	0.0385852	0.0238084	0.0311968	0.0291104	0.0212803	0.0251953
chr1	24119770	24143121	-	ENSG00000142677	IL22RA1	protein_coding	coding	never	0.0368198	0.0701871	0.0535035	0.0193488	0.0147339	0.0170414	0.00578529	0.00735486	0.00657007	0.0453778	0.0845294	0.0649536	0.0823184	0.0418815	0.0621
chr1	24154156	24187959	-	ENSG00000185436	IFNLR1	protein_coding	coding	constitutive	4.35932	4.11077	4.23505	7.54722	6.57872	7.06297	3.19995	2.66781	2.93388	5.75866	6.75404	6.25635	6.37115	5.62524	5.99819
chr1	24200239	24211693	+	ENSG00000230023	RP11-10N16.2	lincRNA	lncRNA	never	0	0.00527987	0.00263993	0	0	0	0.00913925	0.00580938	0.00747431	0	0	0	0	0	0
chr1	24307555	24321901	-	ENSG00000232298	RP11-10N16.3	antisense	lncRNA	never	0.0246434	0	0.0123217	0	0	0	0.046465	0	0.0232325	0.0364455	0	0.0182227	0	0	0
chr1	24319321	24364482	+	ENSG00000158055	GRHL3	protein_coding	coding	pp2_restricted	0.365174	0.273198	0.319186	0.0353282	0.0261873	0.0307578	0.489022	0.258194	0.373608	0.132051	0.134867	0.133459	1.28536	1.3417	1.31353
chr1	24356998	24416934	-	ENSG00000001460	STPG1	protein_coding	coding	constitutive	4.5263	5.9041	5.2152	7.82552	7.76488	7.7952	4.45634	4.05597	4.25615	10.4564	12.0327	11.2446	6.3157	6.98251	6.6491
chr1	24415793	24472976	+	ENSG00000001461	NIPAL3	protein_coding	coding	constitutive	4.15142	3.78655	3.96898	2.53623	1.54761	2.04192	2.35234	2.58815	2.47024	3.79854	3.98329	3.89092	3.17022	3.55583	3.36302
chr1	24502350	24541040	+	ENSG00000117602	RCAN3	protein_coding	coding	constitutive	5.38853	7.38132	6.38492	20.18	15.9402	18.0601	6.17683	6.16007	6.16845	8.22363	12.9622	10.5929	8.79161	10.2347	9.51315
chr1	24538801	24556024	-	ENSG00000264443	RP4-594I10.3	lincRNA	lncRNA	never	0.0386125	0.0490695	0.043841	0.24349	0.0463537	0.144922	0.0121339	0.00771295	0.00992342	0.102757	4.61e-26	0.0513785	0.0710922	0.0718699	0.0714811
chr1	24556110	24609328	+	ENSG00000184454	NCMAP	protein_coding	coding	never	0.0424197	0.281861	0.16214	0.120375	0.0661999	0.0932874	0.00399775	0.0127093	0.00835353	0.0470492	0.0884938	0.0677715	0.117153	0.0894839	0.103318
chr1	24563626	24563974	+	ENSG00000227312	RP11-496D1.2	processed_pseudogene	other	never	0	0	0	0	0	0	0	0	0	0	0.1389	0.06945	0	0.0719485	0.0359742
chr1	24625410	24625513	-	ENSG00000239106	Y_RNA	misc_RNA	other	never	0	0	0	0	0	0	0	0	0	0	0	0	0	0	0
chr1	24631715	24673267	+	ENSG00000133226	SRRM1	protein_coding	coding	constitutive	92.6889	89.3489	91.0189	71.3666	65.7043	68.5354	98.7951	97.1788	97.9869	79.3169	75.4293	77.3731	73.4067	70.9699	72.1883
chr1	24745356	24844324	+	ENSG00000169504	CLIC4	protein_coding	coding	constitutive	80.3857	64.1491	72.2674	48.8714	83.1257	65.9985	44.8432	47.0758	45.9595	50.6792	31.066	40.8726	37.7581	31.2169	34.4875
chr1	24777872	24777979	-	ENSG00000238482	RNU6-1208P	snRNA	other	never	0	0	0	0	0	0	0	0	0	0	0	0	0	0	0
chr1	24899510	24965121	-	ENSG00000020633	RUNX3	protein_coding	coding	never	0.305707	0.920822	0.613264	0.0810356	0.157574	0.119305	0.045099	0.0484004	0.0467497	0	0.0261185	0.0130592	0.100742	0.242745	0.171743
chr1	24919344	24919416	-	ENSG00000278034	MIR6731	miRNA	other	never	0	0	0	0	0	0	0	0	0	0	0	0	0	0	0
chr1	24961344	24963097	+	ENSG00000229162	RP11-84D1.1	antisense	lncRNA	never	0	0.0142165	0.00710825	0	0	0	0	0	0	0	0	0	0	0.0161951	0.00809755
chr1	24968422	24970865	-	ENSG00000261025	RP11-84D1.2	lincRNA	lncRNA	never	0	0	0	0	0	0	0	0	0	0	0	0	0	0.00441326	0.00220663
chr1	25023502	25023586	+	ENSG00000264371	MIR4425	miRNA	other	never	0	0	0	0	0	0	0	0	0	0	0	0	0	0	0
chr1	25043706	25113120	-	ENSG00000233755	RP4-799D16.1	lincRNA	lncRNA	never	0	0	0	0	0	0	0	0	0	0	0	0	0	0	0
chr1	25125052	25125454	-	ENSG00000233419	RP4-781L3.1	processed_pseudogene	other	never	0	0	0	0	0	0	0	0	0	0	0	0	0	0	0
chr1	25208138	25209437	+	ENSG00000231953	RP4-706G24.1	antisense	lncRNA	never	0	0	0	0	0	0	0	0.0122556	0.0061278	0	0.0122481	0.00612405	0	0	0
chr1	25222678	25232502	-	ENSG00000117614	SYF2	protein_coding	coding	constitutive	21.6539	16.2286	18.9413	27.7088	29.8865	28.7977	26.5229	27.2044	26.8636	33.9795	34.0468	34.0132	18.9136	22.777	20.8453
chr1	25242236	25338213	-	ENSG00000117616	RSRP1	protein_coding	coding	constitutive	20.5475	22.302	21.4247	30.5043	15.3718	22.9381	32.8606	28.4518	30.6562	44.1583	66.4207	55.2895	36.0274	51.6249	43.8261
chr1	25336428	25337465	-	ENSG00000259984	RP11-335G20.7	unprocessed_pseudogene	other	pp1_restricted	0.659096	0.468244	0.56367	0.856192	0.379181	0.617687	0.768651	0.821124	0.794887	2.33868	1.16437	1.75152	1.14868	0.777795	0.963237
chr1	25362248	25430192	-	ENSG00000188672	RHCE	protein_coding	coding	never	0.128545	0.173442	0.150994	0.154838	0.0836523	0.119245	0.205236	0.352837	0.279037	0.425654	0.478429	0.452041	0.166177	0.0497673	0.107972
chr1	25272392	25330445	+	ENSG00000187010	RHD	protein_coding	coding	never	0.0213612	0.0220424	0.0217018	0.0067061	0.0174624	0.0120842	0.00883886	0.00787237	0.00835562	0.309364	0.392064	0.350714	0.0217423	0.0152565	0.0184994
chr1	25337916	25362361	+	ENSG00000183726	TMEM50A	protein_coding	coding	constitutive	42.2343	32.7753	37.5048	46.7841	56.3041	51.5441	28.4549	26.5237	27.4893	45.2884	39.0988	42.1936	27.811	39.131	33.471
chr1	25247836	25248321	+	ENSG00000272432	RP3-465N24.6	lincRNA	lncRNA	never	0.17442	0.126661	0.15054	0.256642	0.279185	0.267914	0.43849	0.209046	0.323768	0.859841	0.766034	0.812937	0.367014	0.252506	0.30976
chr1	25266101	25267136	-	ENSG00000261349	RP3-465N24.5	unprocessed_pseudogene	other	stage_specific	0.739006	1.22497	0.981988	1.45884	0.655732	1.05729	1.84776	1.4826	1.66518	2.61352	1.57792	2.09572	1.92687	1.55494	1.7409
chr1	25294163	25294643	-	ENSG00000224183	SDHDP6	processed_pseudogene	other	never	0.730441	0.739203	0.734822	0.525975	0.473992	0.499984	0.637439	1.05586	0.84665	0.780998	0.795107	0.788053	0.537428	0.75022	0.643824
chr1	25398720	25399198	+	ENSG00000238084	RP3-469D22.1	processed_pseudogene	other	never	0.82544	0.744762	0.785101	0.539337	0.477556	0.508447	0.62817	0.938647	0.783408	0.588315	0.577735	0.583025	0.529698	0.598519	0.564109
chr1	25430857	25500209	+	ENSG00000204178	TMEM57	protein_coding	coding	constitutive	4.19652	2.66994	3.43323	5.06705	6.06628	5.56667	5.37789	5.94656	5.66223	10.7148	11.3015	11.0082	8.6697	10.1595	9.4146
chr1	25543579	25568886	+	ENSG00000157978	LDLRAP1	protein_coding	coding	constitutive	16.5365	18.3559	17.4462	12.5214	12.8821	12.7018	6.53969	6.30965	6.42467	8.72461	5.35185	7.03823	11.5225	4.46083	7.99167
chr1	25581477	25590356	+	ENSG00000225643	RP11-70P17.1	lincRNA	lncRNA	never	0.0585692	0.31899	0.18878	0.0738676	0.0703115	0.0720896	0.110432	0.105294	0.107863	0.346475	0.245537	0.296006	0.138646	0.109016	0.123831
chr1	25617467	25786207	+	ENSG00000117643	MAN1C1	protein_coding	coding	stage_specific	4.24645	7.02892	5.63769	1.30189	1.0527	1.17729	0.577201	0.425573	0.501387	0.115246	0.230528	0.172887	2.04855	1.67548	1.86201
chr1	25644543	25659111	-	ENSG00000233478	RP1-187B23.1	antisense	lncRNA	never	0	0	0	0	0	0	0	0	0	0	0.00472371	0.00236185	0	0.00489364	0.00244682
chr1	25800175	25818224	+	ENSG00000162430	SELENON	protein_coding	coding	constitutive	48.7745	54.3934	51.584	49.8089	37.9917	43.9003	44.6618	37.1776	40.9197	29.4935	25.7249	27.6092	43.1965	30.6682	36.9323
chr1	25811469	25823744	+	ENSG00000255054	RP1-317E23.6	protein_coding	coding	never	2.98e-37	1.85e-56	1.49e-37	0.0730066	4.66e-60	0.0365033	7.29e-69	1.13e-49	5.64525e-50	2.94e-26	1.02e-20	5.08e-21	6.75e-91	1.7e-53	8.49345e-54
chr1	25818639	25832942	+	ENSG00000117640	MTFR1L	protein_coding	coding	constitutive	13.7942	13.2096	13.5019	14.198	15.9962	15.0971	14.283	11.652	12.9675	25.2077	20.2336	22.7206	23.7775	20.1861	21.9818
chr1	25816748	25820797	-	ENSG00000228172	RP1-317E23.3	antisense	lncRNA	never	0.116628	0.626122	0.371375	0.622686	0.163684	0.393185	0.540544	0.404277	0.472411	1.90629	0.953175	1.42973	0.625437	0.477789	0.551613
chr1	25831912	25832134	-	ENSG00000272478	RP1-317E23.7	antisense	lncRNA	pp1_restricted	8.69e-52	2.12e-59	4.35e-52	1.49565	2.05e-248	0.747825	2.87e-172	9.82e-80	4.91031e-80	19.2844	29.5569	24.4206	6.86e-213	1.41e-11	7.05325e-12
chr1	25831912	25859458	-	ENSG00000127423	AUNIP	protein_coding	coding	constitutive	11.871	7.53662	9.70381	3.39699	5.46282	4.4299	5.35031	4.52417	4.93724	2.60959	1.16537	1.88748	3.60765	2.22858	2.91811
chr1	25859612	25863420	+	ENSG00000236528	RP1-125I3.2	antisense	lncRNA	pp1_restricted	0.249143	0.108554	0.178848	0.706993	0.179455	0.443224	0.164415	0.119441	0.141928	1.11535	1.71999	1.41767	0.176933	0.293698	0.235316
chr1	25861209	25871253	-	ENSG00000182749	PAQR7	protein_coding	coding	constitutive	3.40534	3.93208	3.66871	6.42277	4.16834	5.29556	5.3005	3.6837	4.4921	6.87517	5.69233	6.28375	4.42432	2.73515	3.57973
chr1	25877495	25877605	-	ENSG00000207302	Y_RNA	misc_RNA	other	never	0	0	0	0	0	0	0	0	0	0	0	0	0	0	0
chr1	25884180	25906991	-	ENSG00000117632	STMN1	protein_coding	coding	constitutive	369.443	275.562	322.502	333.927	385.743	359.835	485.905	520.742	503.324	750.659	624.936	687.798	532.748	544.332	538.54
chr1	25887359	25887610	+	ENSG00000229786	SNRPFP2	processed_pseudogene	other	never	0	0	0	0	0	0	0	0	0	0	1.09193	0.545965	0	0	0
chr1	25888969	25889109	+	ENSG00000223624	RP1-125I3.4	processed_pseudogene	other	never	0	0	0	0	0	0	0	0	0	0	5.17758	2.58879	0	0	0
chr1	25959766	25998157	-	ENSG00000158006	PAFAH2	protein_coding	coding	constitutive	5.74846	9.02207	7.38527	4.45684	3.18778	3.82231	7.47008	10.3947	8.93239	7.93774	9.50872	8.72323	9.00574	7.06196	8.03385
chr1	25964196	25964300	+	ENSG00000207237	RNU6-110P	snRNA	other	never	0	0	0	0	0	0	0	0	0	0	0	0	0	0	0
chr1	26006005	26006130	+	ENSG00000252190	SCARNA17	scaRNA	other	never	0	0	0	0	0	0	0	0	0	0	0	0	0	0	0
chr1	26006215	26006299	+	ENSG00000252691	SCARNA18	scaRNA	other	never	0	0	0	0	0	0	0	0	0	0	0	0	0	0	0
chr1	26019883	26036464	+	ENSG00000158008	EXTL1	protein_coding	coding	pp1_restricted	0.232101	0.759612	0.495856	1.09051	0.755508	0.923009	0.667039	0.614098	0.640568	1.43042	1.21074	1.32058	0.836781	0.916129	0.876455
chr1	26037251	26046133	-	ENSG00000158014	SLC30A2	protein_coding	coding	never	0.250921	0.118468	0.184695	0.167773	0.0272849	0.097529	0.0301327	0.12094	0.0755364	0.188795	0.131152	0.159973	0.108029	0.119927	0.113978
chr1	26051303	26068436	-	ENSG00000158022	TRIM63	protein_coding	coding	never	0	0.00749614	0.00374807	0.102771	0.0489119	0.0758415	0	0.00610396	0.00305198	0.015064	0	0.007532	0.00803739	0.0189591	0.0134982
chr1	26111164	26125543	+	ENSG00000175087	PDIK1L	protein_coding	coding	stage_specific	0.924985	0.835692	0.880339	1.07381	0.890234	0.982022	2.30528	2.7785	2.54189	2.29271	1.99367	2.14319	2.88716	2.59518	2.74117
chr1	26159019	26163962	+	ENSG00000197245	FAM110D	protein_coding	coding	never	0.275884	0.359255	0.31757	0.234485	0.179997	0.207241	0.604989	0.551685	0.578337	0.240223	0.0961419	0.168182	0.179833	0.0855846	0.132709
chr1	26164160	26168581	-	ENSG00000282872	RP11-96L14.8	protein_coding	coding	never	0	0.0200556	0.0100278	0.0232211	0	0.0116106	0	0.0722285	0.0361143	0.184834	0	0.092417	0.277752	0.392804	0.335278
chr1	26169515	26171821	-	ENSG00000236782	RP11-96L14.7	protein_coding	coding	never	0.516048	0.714669	0.615359	0.722801	0.322312	0.522556	0.347495	0.0600033	0.203749	0.318649	0.415959	0.367304	0.402994	0.179382	0.291188
chr1	26169870	26170873	+	ENSG00000142684	ZNF593	protein_coding	coding	constitutive	43.0744	28.7619	35.9181	26.6161	39.1128	32.8644	21.2534	14.7655	18.0095	32.833	16.4244	24.6287	29.6739	20.3424	25.0082
chr1	26177402	26189886	+	ENSG00000142675	CNKSR1	protein_coding	coding	constitutive	5.62479	6.68999	6.15739	14.0871	12.6305	13.3588	11.1526	8.41813	9.78537	13.6128	12.6976	13.1552	10.3299	9.98419	10.157
chr1	26190560	26202968	+	ENSG00000188782	CATSPER4	protein_coding	coding	never	0.123612	0.209978	0.166795	0.0619385	0.0352994	0.048619	0.096808	0.0441546	0.0704813	0.0552228	0.089451	0.0723369	0.0618747	0.0521268	0.0570008
chr1	26209740	26229840	+	ENSG00000236155	RP11-231P20.2	transcribed_unprocessed_pseudogene	other	es_restricted	1.13446	1.297	1.21573	0.745373	0.571992	0.658682	0.310976	0.0988363	0.204906	0.307157	0.250599	0.278878	0.35993	0.227399	0.293664
chr1	26218580	26220476	-	ENSG00000278572	RP11-231P20.6	unprocessed_pseudogene	other	never	0.150156	0.144688	0.147422	0.174809	0.291189	0.232999	0.261339	0.200729	0.231034	0.273313	0.249029	0.261171	0.273424	0.293819	0.283622
chr1	26234152	26279038	+	ENSG00000130695	CEP85	protein_coding	coding	constitutive	12.314	12.0997	12.2068	6.63056	8.44721	7.53888	8.09487	9.07005	8.58246	6.1241	4.69463	5.40937	6.64563	5.61837	6.132
chr1	26263040	26263398	-	ENSG00000270733	RP11-231P20.5	processed_pseudogene	other	never	0	0	0	0.0682786	0	0.0341393	0	0.064885	0.0324425	0	0.0648455	0.0324228	0	0	0
chr1	26279175	26281522	+	ENSG00000142669	SH3BGRL3	protein_coding	coding	constitutive	120.2	113.369	116.784	154.281	158.256	156.268	99.6982	71.121	85.4096	114.273	107.889	111.081	136.784	104.355	120.57
chr1	26317956	26320523	+	ENSG00000169442	CD52	protein_coding	coding	stage_specific	4.96014	3.78207	4.37111	0.860164	0.818754	0.839459	1.75356	1.70913	1.73134	4.95154	1.33702	3.14428	0.293544	0.346214	0.319879
chr1	26281327	26318363	-	ENSG00000158062	UBXN11	protein_coding	coding	constitutive	5.85828	4.93955	5.39891	4.56402	5.81718	5.1906	12.1436	9.2001	10.6718	33.2473	29.7493	31.4983	25.8409	14.9406	20.3908
chr1	26321858	26354130	-	ENSG00000176092	AIM1L	protein_coding	coding	constitutive	9.04052	9.24681	9.14367	3.05307	2.96541	3.00924	10.937	5.96971	8.45336	6.03734	4.16341	5.10037	8.49056	5.99929	7.24493
chr1	26326687	26327033	+	ENSG00000225854	RP11-569G9.7	processed_pseudogene	other	never	0	0	0	0	0	0	0	0	0	0	0.14089	0.070445	0	0	0
chr1	26361633	26374522	-	ENSG00000176083	ZNF683	protein_coding	coding	never	0	0	0	0	0.027255	0.0136275	0.0206642	0	0.0103321	0	0.0135945	0.00679725	0	0	0
chr1	26410777	26429722	+	ENSG00000131914	LIN28A	protein_coding	coding	constitutive	263.163	229.133	246.148	279.719	287.781	283.75	299.706	286.182	292.944	115.344	70.3178	92.8309	51.0927	49.4729	50.2828
chr1	26432281	26471294	+	ENSG00000117682	DHDDS	protein_coding	coding	constitutive	20.7049	16.7636	18.7342	15.234	16.0159	15.625	13.4935	10.1121	11.8028	16.9028	16.1511	16.5269	17.7662	13.0544	15.4103
chr1	26454652	26455187	-	ENSG00000223583	RP3-476K8.4	processed_pseudogene	other	stage_specific	0.576558	0.642304	0.609431	0.429167	0.71378	0.571473	1.52873	1.90373	1.71623	1.15617	1.4371	1.29663	0.94996	0.731988	0.840974
chr1	26462755	26467282	-	ENSG00000225891	RP3-476K8.3	antisense	lncRNA	never	0.200275	0.218154	0.209214	0.252587	0.0601068	0.156347	0.23601	0.630086	0.433048	0.370236	0.569731	0.469983	0.434587	0.652356	0.543471
chr1	26472449	26475972	+	ENSG00000198830	HMGN2	protein_coding	coding	constitutive	415.209	216.624	315.916	276.104	477.866	376.985	524.247	415.716	469.981	347.862	179.477	263.67	595.996	307.413	451.704
chr1	26519353	26520250	-	ENSG00000224129	DPPA2P2	processed_pseudogene	other	never	0	0.00630916	0.00315458	0	0	0	0	0	0	0	0.0277507	0.0138753	0	0	0
chr1	26529760	26575030	+	ENSG00000117676	RPS6KA1	protein_coding	coding	constitutive	15.499	15.6244	15.5617	11.9542	12.955	12.4546	9.20765	7.72337	8.46551	7.9716	7.29957	7.63558	9.02435	7.46251	8.24343
chr1	26554541	26554593	+	ENSG00000238705	MIR1976	miRNA	other	never	0	0	0	0	0	0	0	0	0	0	0	0	0	0	0
chr1	26593242	26593546	-	ENSG00000243905	RN7SL679P	misc_RNA	other	never	0	0	0	0	0	0	0	0	0	0	0.0994215	0.0497107	0	0	0
chr1	26593939	26594041	-	ENSG00000252802	Y_RNA	misc_RNA	other	never	0	0	0	0	0	0	0	0	0	0	0	0	0	0	0
chr1	26602368	26602432	-	ENSG00000252429	RNU7-29P	snRNA	other	never	0	0	0	0	0	0	0	0	0	0	0	0	0	0	0
chr1	26640376	26640614	-	ENSG00000229247	RP11-492M19.3	processed_pseudogene	other	never	0	0	0	0	0	0	0	0	0	0	0	0	0	0	0
chr1	26642285	26642389	-	ENSG00000238316	snoU13	snoRNA	other	never	0	0	0	0	0	0	0	0	0	0	0	0	0	0	0
chr1	26647446	26647681	+	ENSG00000235069	RP4-785J1.1	processed_pseudogene	other	never	0	0	0	0	0	0	0	0	0	0	0	0	0	0	0
chr1	26692131	26694131	-	ENSG00000260063	RP5-968P14.2	antisense	lncRNA	never	0.168636	0.0580075	0.113322	0.106342	0.17048	0.138411	0.22592	0.186156	0.206038	0.144388	0.128438	0.136413	0.315156	0.25331	0.284233
chr1	26693235	26782104	+	ENSG00000117713	ARID1A	protein_coding	coding	constitutive	76.4352	60.9205	68.6779	75.5408	63.8393	69.69	116.649	102.012	109.331	91.6358	83.0253	87.3306	131.647	95.3655	113.506
chr1	26787471	26798398	+	ENSG00000060642	PIGV	protein_coding	coding	constitutive	4.94452	7.09805	6.02128	6.96621	6.6038	6.785	5.38179	6.38052	5.88115	4.67614	4.10682	4.39148	4.80322	4.55506	4.67914
chr1	26814821	26815112	+	ENSG00000241188	RN7SL165P	misc_RNA	other	never	0	0.205473	0.102736	0.118952	0	0.059476	0	0	0	0	0.225942	0.112971	0.148845	0	0.0744225
chr1	26826709	26857602	+	ENSG00000204160	ZDHHC18	protein_coding	coding	constitutive	17.8392	16.5688	17.204	27.7799	32.1374	29.9586	23.9716	21.1717	22.5717	18.8205	12.5368	15.6786	19.4114	10.3759	14.8936
chr1	26863137	26864457	+	ENSG00000175793	SFN	protein_coding	coding	stage_specific	5.42839	4.42305	4.92572	1.24642	2.21809	1.73226	0.216046	0.102998	0.159522	0.529559	0.317383	0.423471	2.40729	1.67955	2.04342
chr1	26876132	26878245	+	ENSG00000226698	RP1-50O24.6	antisense	lncRNA	never	0	0.177486	0.088743	0	0	0	0	0	0	2.54e-12	0.839059	0.419529	0	0	0
chr1	26876132	26890297	-	ENSG00000142751	GPN2	protein_coding	coding	constitutive	36.3915	19.9219	28.1567	23.2507	40.8847	32.0677	24.8267	20.8699	22.8483	33.6518	21.6824	27.6671	38.864	21.757	30.3105
chr1	26890487	26900466	-	ENSG00000198746	GPATCH3	protein_coding	coding	constitutive	7.23531	4.81958	6.02745	5.93091	7.78605	6.85848	6.52788	6.91282	6.72035	7.18083	7.59888	7.38985	8.25878	7.38054	7.81966
chr1	26900237	26946862	+	ENSG00000090273	NUDC	protein_coding	coding	constitutive	113.809	60.995	87.402	45.7809	71.2999	58.5404	57.8765	39.261	48.5688	62.6469	47.4835	55.0652	69.9232	48.6748	59.299
chr1	26911488	26913966	-	ENSG00000131910	NR0B2	protein_coding	coding	never	0	0	0	0	0	0	0	0.0402974	0.0201487	0.0745877	0.0805458	0.0775668	0.650005	0.573673	0.611839
chr1	26949561	26960406	-	ENSG00000175707	KDF1	protein_coding	coding	constitutive	10.4359	10.193	10.3145	10.2901	10.4595	10.3748	11.8005	9.81075	10.8056	12.7964	11.294	12.0452	15.4942	12.3523	13.9232
chr1	26980164	26980975	+	ENSG00000172746	RPL12P13	unprocessed_pseudogene	other	never	0.0278458	0.207014	0.11743	0.166816	0.0779998	0.122408	0.183761	0.348755	0.266258	0	0.496726	0.248363	0.153807	0.426156	0.289982
chr1	26983627	26984024	+	ENSG00000224064	RP11-344H11.5	processed_pseudogene	other	never	0.17152	0.0467081	0.109114	0.216321	0	0.108161	0.24255	0.462532	0.352541	0.507327	1.23267	0.869999	0.203013	0.691715	0.447364
chr1	26985896	26986340	-	ENSG00000225294	OSTCP2	processed_pseudogene	other	never	0.0342086	0.0372626	0.0357356	0.0359533	0.082134	0.0590437	0.0967502	0.122999	0.109875	0.30355	0.655595	0.479573	0.0269931	0.0212243	0.0241087
chr1	26993706	27000898	+	ENSG00000253368	TRNP1	protein_coding	coding	constitutive	22.3236	21.9717	22.1476	10.9577	10.217	10.5874	1.58113	1.1011	1.34112	5.11962	4.69045	4.90503	20.7601	20.8168	20.7885
chr1	27005019	27012836	-	ENSG00000158246	FAM46B	protein_coding	coding	constitutive	44.6861	41.3593	43.0227	2.68748	2.84528	2.76638	4.22595	2.77445	3.5002	7.35871	6.2861	6.8224	4.32118	2.46606	3.39362
chr1	27064990	27065365	-	ENSG00000280403	AL137860.1	protein_coding	coding	never	0	0	0	0	0	0	0	0	0	0	0.0698616	0.0349308	0	0	0
chr1	27098814	27166981	-	ENSG00000090020	SLC9A1	protein_coding	coding	constitutive	9.15684	10.6227	9.88977	11.1029	9.25694	10.1799	11.7985	10.9107	11.3546	9.07806	9.30799	9.19303	11.3731	8.52162	9.94736
chr1	27176750	27177277	+	ENSG00000229985	RP11-40H20.5	processed_pseudogene	other	never	0	0.00914749	0.00457374	0	0.0151221	0.00756105	0	0	0	0.0248392	0	0.0124196	0	0	0
chr1	27200833	27201473	-	ENSG00000214973	CHCHD3P3	processed_pseudogene	other	constitutive	3.28175	3.59492	3.43833	1.39134	1.53581	1.46358	2.01013	1.99995	2.00504	1.64523	1.6434	1.64431	1.6971	1.42644	1.56177
chr1	27206929	27207796	+	ENSG00000225159	NPM1P39	processed_pseudogene	other	constitutive	14.5498	14.45	14.4999	7.98846	9.50037	8.74442	11.3808	17.5387	14.4597	7.23834	6.49533	6.86684	5.72483	5.82677	5.7758
chr1	27211264	27211484	+	ENSG00000225990	SNRPEP7	processed_pseudogene	other	never	0	0	0	0	0	0	0	0	0	0	0	0	0	0	0
chr1	27229105	27234352	-	ENSG00000224311	RP11-40H20.4	antisense	lncRNA	never	0	0	0	0	0	0	0	0	0	0	0	0	0	0	0
chr1	27234515	27308633	+	ENSG00000142784	WDTC1	protein_coding	coding	constitutive	9.50894	11.4053	10.4571	19.4337	16.1719	17.8028	20.4051	18.9469	19.676	28.4107	25.1538	26.7823	26.829	19.6538	23.2414
chr1	27255463	27255567	-	ENSG00000252098	Y_RNA	misc_RNA	other	never	0	0	0	0	0	0	0	0	0	0	34.5526	17.2763	0	0	0
chr1	27311239	27311838	+	ENSG00000243659	RP11-4K3__A.3	processed_pseudogene	other	never	0	0	0	0.26175	0	0.130875	0.586973	0.870591	0.728782	0.613867	0.994355	0.804111	0.163764	0.643829	0.403797
chr1	27322144	27336400	+	ENSG00000186501	TMEM222	protein_coding	coding	constitutive	12.6473	9.48746	11.0674	12.7588	16.0836	14.4212	20.4369	14.5278	17.4824	21.3192	15.3807	18.3499	29.3555	16.9847	23.1701
chr1	27325218	27325325	+	ENSG00000206888	RNU6-48P	snRNA	other	never	0	0	0	0	0	0	0	0	0	0	23.8472	11.9236	0	0	0
chr1	27325328	27325796	+	ENSG00000241547	ACTG1P20	processed_pseudogene	other	constitutive	1.64305	1.57023	1.60664	1.2316	1.60029	1.41595	2.62059	1.88252	2.25156	2.38408	2.29602	2.34005	4.1463	2.05805	3.10217
chr1	27342019	27353937	+	ENSG00000142765	SYTL1	protein_coding	coding	constitutive	4.21019	5.15863	4.68441	3.71879	1.89875	2.80877	5.23486	3.78162	4.50824	2.76033	1.95354	2.35694	1.99172	1.59675	1.79424
chr1	27355183	27366892	-	ENSG00000142733	MAP3K6	protein_coding	coding	constitutive	6.98081	9.75706	8.36894	5.18684	3.49615	4.3415	1.98562	2.01945	2.00253	2.32771	1.17166	1.74968	1.46743	1.24637	1.3569
chr1	27369111	27374824	-	ENSG00000142748	FCN3	protein_coding	coding	never	0.0606452	0.334816	0.197731	0.101986	0.163036	0.132511	0.111135	0.0832866	0.0972108	0.0924338	0.0121047	0.0522693	0	0	0
chr1	27379175	27383380	-	ENSG00000174950	CD164L2	protein_coding	coding	never	0.447743	1.31836	0.883051	1.25672	0.797296	1.02701	0.381853	0.337356	0.359604	0.10157	0.218987	0.160278	0.0402334	0.0632695	0.0517514
chr1	27389467	27390145	+	ENSG00000231207	RP1-144C9.2	processed_pseudogene	other	never	0	0	0	0	0	0	0	0	0	0	0	0	0	0	0
chr1	27392643	27395814	+	ENSG00000181773	GPR3	protein_coding	coding	stage_specific	3.15221	4.74621	3.94921	1.5408	2.05227	1.79653	0.95127	0.659647	0.805458	0.567315	0.469463	0.518389	1.21734	0.646744	0.932042
chr1	27404225	27490158	-	ENSG00000158195	WASF2	protein_coding	coding	constitutive	28.3157	39.9193	34.1175	47.9356	38.8838	43.4097	34.207	31.4236	32.8153	29.2013	32.1087	30.655	30.2928	26.0657	28.1792
chr1	27457197	27459582	+	ENSG00000241169	RP4-752I6.1	lincRNA	lncRNA	never	0	0	0	0	0	0	0	0	0	0	0	0	0	0	0
chr1	27525804	27530561	+	ENSG00000237429	RP1-159A19.4	antisense	lncRNA	pp1_restricted	0.205286	0	0.102643	0.258908	0.246444	0.252676	0.774132	0.369059	0.571596	1.518	1.84417	1.68108	0.323972	0.50947	0.416721
chr1	27534034	27604431	-	ENSG00000126705	AHDC1	protein_coding	coding	constitutive	3.88826	5.27157	4.57991	7.13991	5.37555	6.25773	8.32914	9.01464	8.67189	10.4866	11.1406	10.8136	12.314	8.96152	10.6378
chr1	27612063	27635277	-	ENSG00000000938	FGR	protein_coding	coding	never	0.170717	0.21551	0.193113	0.0421253	0.0178199	0.0299726	0.00826986	0	0.00413493	0	0.00525355	0.00262678	0	0	0
chr1	27649418	27649610	+	ENSG00000235912	RP1-159A19.3	processed_pseudogene	other	constitutive	72.6311	40.8892	56.7602	40.9037	77.0057	58.9547	40.2701	35.2508	37.7604	44.8804	39.8806	42.3805	33.0249	46.1785	39.6017
chr1	27660327	27662722	-	ENSG00000233975	RP11-288L9.1	lincRNA	lncRNA	never	0	0	0	0	0	0	0	0	0	0	0	0	0	0	0
chr1	27666060	27672218	-	ENSG00000126709	IFI6	protein_coding	coding	stage_specific	1.06256	1.24354	1.15305	0.684164	0.575506	0.629835	0.261653	0.272163	0.266908	3.03508	1.75759	2.39634	3.64354	2.88094	3.26224
chr1	27669467	27703063	+	ENSG00000225886	RP11-288L9.4	antisense	lncRNA	never	0	0	0	0	0	0	0	0	0	0.0847422	0.0343168	0.0595295	0	0	0
chr1	27675602	27675709	-	ENSG00000206767	RNU6-949P	snRNA	other	never	0	0	0	0	0	0	0	0	0	0	0	0	0	0	0
chr1	27686809	27687471	-	ENSG00000226662	CHMP1AP1	processed_pseudogene	other	never	0	0	0	0	0	0	0	0	0	0	0	0	0	0	0
chr1	27693730	27693835	+	ENSG00000207095	RNU6-424P	snRNA	other	never	0	0	0	0	0	0	0	0	0	0	0	0	0	0	0
chr1	27725978	27763122	+	ENSG00000009780	FAM76A	protein_coding	coding	constitutive	5.29211	5.03876	5.16544	4.06327	4.06921	4.06624	2.41622	2.55298	2.4846	5.41018	4.60755	5.00887	2.64927	2.69266	2.67096
chr1	27739090	27739439	+	ENSG00000231344	RP3-426I6.2	processed_pseudogene	other	never	0.575749	0.344932	0.46034	0.21784	0.138236	0.178038	0.325671	0.138009	0.23184	0	0.241368	0.120684	0.181723	0.21433	0.198026
chr1	27739953	27740629	+	ENSG00000230833	RPEP3	processed_pseudogene	other	never	0.0684091	0	0.0342046	0.0215694	0.0410621	0.0313158	0.0322462	0.0819894	0.0571178	0.151757	0.286788	0.219273	0.0269899	0.0424436	0.0347167
chr1	27773182	27824452	+	ENSG00000117758	STX12	protein_coding	coding	constitutive	3.93953	4.45879	4.19916	8.8517	8.86529	8.85849	4.48554	5.82493	5.15524	8.56318	9.50185	9.03252	7.70358	9.62803	8.66581
chr1	27773857	27774041	+	ENSG00000269971	RP3-426I6.5	sense_intronic	lncRNA	de_restricted	0	0	0	1.31438	1.25111	1.28275	0.9825	0	0.49125	0	3.12074	1.56037	0.822348	4.52621	2.67428
chr1	27819982	27820341	+	ENSG00000270031	RP3-426I6.6	sense_intronic	lncRNA	never	0.107559	0.0585806	0.0830698	0.20348	0	0.10174	0.304202	0.128911	0.216557	0.477211	0.515331	0.496271	0	0.53387	0.266935
chr1	27824537	27824643	+	ENSG00000223062	RNU6-1245P	snRNA	other	never	0	0	0	0	0	0	0	0	0	0	0	0	0	0	0
chr1	27830777	27851676	+	ENSG00000117751	PPP1R8	protein_coding	coding	constitutive	44.2857	22.4697	33.3777	23.1409	40.0948	31.6179	39.1118	34.1754	36.6436	48.8186	24.1678	36.4932	43.357	23.8196	33.5883
chr1	27850573	27850744	-	ENSG00000278868	AL109927.1	protein_coding	coding	pp1_restricted	0	0.799172	0.399586	1.85062	0	0.92531	0	0.87932	0.43966	66.3058	44.3067	55.3062	0	0	0
chr1	27834400	27834566	+	ENSG00000252947	SCARNA1	scaRNA	other	stage_specific	1.69708	3.69717	2.69713	3.21053	0	1.60526	12.7993	5.08494	8.94212	7.52949	3.04911	5.2893	4.01736	4.21173	4.11454
chr1	27872542	27886685	+	ENSG00000130775	THEMIS2	protein_coding	coding	stage_specific	8.40685	11.1022	9.75452	8.08445	5.16841	6.62643	3.71125	3.01941	3.36533	4.14338	2.37336	3.25837	0.824882	0.926665	0.875773
chr1	27891523	27914746	-	ENSG00000117748	RPA2	protein_coding	coding	constitutive	42.8932	25.667	34.2801	16.419	24.9621	20.6906	26.4335	26.3688	26.4012	22.4058	17.2637	19.8347	26.2558	21.3203	23.788
chr1	27934992	27959157	+	ENSG00000130768	SMPDL3B	protein_coding	coding	constitutive	26.7753	20.3515	23.5634	4.61164	6.7954	5.70352	4.95657	3.97877	4.46767	8.10151	5.39248	6.747	9.00914	4.90856	6.95885
chr1	27959461	27968096	+	ENSG00000158156	XKR8	protein_coding	coding	constitutive	8.9133	11.0041	9.9587	17.4584	18.0042	17.7313	8.3148	6.62711	7.47096	8.91932	7.8632	8.39126	8.78631	6.7294	7.75786
chr1	27938874	27960193	-	ENSG00000227050	RP11-460I13.2	antisense	lncRNA	never	0	0.0619683	0.0309841	0.0717491	0	0.0358745	0.0536323	0	0.0268162	2.91e-192	0.0374062	0.0187031	0	0.0352964	0.0176482
chr1	27970343	28088696	-	ENSG00000158161	EYA3	protein_coding	coding	constitutive	8.60642	7.92591	8.26617	8.30507	8.87724	8.59116	9.70863	12.2726	10.9906	13.552	11.3863	12.4692	11.1782	11.8783	11.5282
chr1	27990157	27990524	-	ENSG00000238231	RP11-460I13.6	processed_pseudogene	other	never	0.408541	0.33376	0.37115	0.515253	0.367836	0.441545	0.288863	0.67326	0.481061	0.302098	1.22336	0.762729	0.483553	0.633686	0.55862
chr1	28031883	28032180	-	ENSG00000240750	RN7SL559P	misc_RNA	other	pp1_restricted	0.355154	0.290145	0.322649	0.67188	0.426357	0.549118	0.33482	1.27697	0.805895	1.3131	2.02064	1.66687	0.420363	1.87298	1.14667
chr1	28095741	28096422	-	ENSG00000228589	SPCS2P4	processed_pseudogene	other	constitutive	14.2071	12.1426	13.1748	15.3288	17.0216	16.1752	18.2641	17.5614	17.9127	19.1093	18.9086	19.0089	17.343	19.7078	18.5254
chr1	28109738	28110298	+	ENSG00000228943	RP5-1053E7.2	processed_pseudogene	other	never	0	0	0	0	0	0	0	0	0	0	0	0	0	0	0
chr1	28120448	28121321	-	ENSG00000214812	RP5-1053E7.3	processed_pseudogene	other	never	0	0.0125279	0.00626395	0.0290105	0	0.0145053	0	0.0551372	0.0275686	0	0.0137759	0.00688795	0.0181505	0.0570859	0.0376182
chr1	28142736	28142841	-	ENSG00000253005	RNU6-176P	snRNA	other	never	0	0	0	0	0	0	0	0	0	0	0	0	0	0	0
chr1	28147165	28193936	-	ENSG00000169403	PTAFR	protein_coding	coding	never	0.80642	1.31756	1.06199	0.492745	0.214738	0.353741	0.0897513	0.142885	0.116318	0.484238	0.173169	0.328703	0.905123	0.567285	0.736204
chr1	28199455	28233025	-	ENSG00000126698	DNAJC8	protein_coding	coding	constitutive	65.093	54.3037	59.6983	54.0256	69.545	61.7853	59.0655	66.3001	62.6828	71.2997	62.1322	66.716	54.2079	62.6236	58.4158
chr1	28236108	28246906	+	ENSG00000130770	ATPIF1	protein_coding	coding	constitutive	445.346	210.236	327.791	185.064	300.156	242.61	166.772	133.33	150.051	185.663	108.262	146.963	218.326	147.915	183.12
chr1	28239508	28241453	-	ENSG00000270605	RP5-1092A3.4	antisense	lncRNA	stage_specific	0.613536	1.67077	1.14215	0.952804	0.505685	0.729244	0.811498	1.02617	0.918834	1.06311	1.17911	1.12111	1.08507	1.45068	1.26788
chr1	28247143	28247568	+	ENSG00000271398	RP5-1092A3.5	lincRNA	lncRNA	never	0	0	0	0	0	0	0	0	0	0.44083	0.0446291	0.24273	0.0588011	0.0924691	0.0756351
chr1	28259526	28282491	+	ENSG00000130766	SESN2	protein_coding	coding	constitutive	6.27231	6.64026	6.45629	4.24248	5.15507	4.69878	5.10076	4.42187	4.76131	5.18482	4.27695	4.73088	7.48578	5.60041	6.5431
chr1	28329001	28335967	+	ENSG00000130772	MED18	protein_coding	coding	constitutive	10.2184	9.55142	9.88491	10.6911	13.6974	12.1943	6.84237	7.50041	7.17139	8.72465	5.1815	6.95308	7.10942	4.75175	5.93058
chr1	28369581	28500369	+	ENSG00000204138	PHACTR4	protein_coding	coding	constitutive	18.2938	15.5639	16.9289	15.6914	15.667	15.6792	16.8876	18.0971	17.4923	17.7887	22.509	20.1488	23.3355	23.5385	23.437
chr1	28422554	28422655	-	ENSG00000206779	Y_RNA	misc_RNA	other	never	0	0	0	0	0	0	0	0	0	0	54.057	27.0285	0	0	0
chr1	28453540	28453934	+	ENSG00000229820	RP1-308E4.1	processed_pseudogene	other	never	0.174329	0.332311	0.25332	0.164898	0	0.082449	0.164348	0.679042	0.421695	0.257817	1.04404	0.650929	0.206337	0.648962	0.42765
chr1	28481361	28481480	+	ENSG00000221216	RNU6ATAC27P	snRNA	other	pp2_restricted	0	14.9448	7.4724	0	16.4706	8.2353	0	41.1091	20.5545	0	32.8672	16.4336	32.4782	8.5124	20.4953
chr1	28505942	28539300	+	ENSG00000180198	RCC1	protein_coding	coding	constitutive	48.3456	33.0313	40.6885	32.2224	38.9196	35.571	27.4231	22.8836	25.1533	17.475	9.75825	13.6166	21.5008	16.4572	18.979
chr1	28505979	28510892	+	ENSG00000242125	SNHG3	sense_intronic	lncRNA	constitutive	32.5172	38.7818	35.6495	19.0564	16.6005	17.8285	25.7556	20.5324	23.144	6.92424	5.94664	6.43544	8.30846	8.88251	8.59549
chr1	28507365	28507571	+	ENSG00000274266	SNORA73A	snoRNA	other	constitutive	32.2641	14.0333	23.1487	5.52081	16.5918	11.0563	69.5974	5.20439	37.4009	16.8659	3.48632	10.1761	5.59271	7.06347	6.32809
chr1	28508558	28508762	+	ENSG00000200087	SNORA73B	snoRNA	other	constitutive	46.0366	34.8845	40.4605	15.9879	32.0384	24.0131	68.5608	12.3945	40.4776	14.8009	8.39119	11.596	7.37055	9.52096	8.44576
chr1	28526317	28527227	-	ENSG00000231468	PRDX3P2	processed_pseudogene	other	never	0	0.0433286	0.0216643	0.125419	0	0.0627095	0.0375001	0.0595925	0.0485463	0.23531	0.643207	0.439258	0	0	0
chr1	28544459	28546542	+	ENSG00000279443	RP4-669K10.8	TEC	lncRNA	never	0.305345	0.166302	0.235823	0.176505	0.13237	0.154438	0.343836	0.528611	0.436223	0.489211	0.731477	0.610344	0.632467	0.810416	0.721441
chr1	28553084	28578545	+	ENSG00000180098	TRNAU1AP	protein_coding	coding	constitutive	20.0923	11.4454	15.7689	20.5806	31.3639	25.9722	13.6421	11.2677	12.4549	20.6148	13.7535	17.1841	16.231	13.0968	14.6639
chr1	28578537	28582983	-	ENSG00000197989	SNHG12	antisense	lncRNA	constitutive	28.0964	25.0628	26.5796	6.66307	7.49285	7.07796	13.7579	8.14063	10.9493	9.27665	9.23358	9.25511	12.0168	11.2292	11.623
chr1	28579763	28579893	-	ENSG00000278274	SNORA61	snoRNA	other	constitutive	18.9019	171.675	95.2884	7.14282	12.5343	9.83856	41.6637	3.80491	22.7343	34.5866	56.502	45.5443	27.2915	14.3211	20.8063
chr1	28580380	28580512	-	ENSG00000273544	SNORA44	snoRNA	other	pp2_restricted	2.71e-184	6.46e-61	3.23e-61	3.31732	0	1.65866	4.31e-20	1.65253	0.826265	0.835473	3.91441	2.37494	10.3436	7.85609	9.09985
chr1	28580919	28581054	-	ENSG00000280498	SNORA16A	snoRNA	other	never	0.00212868	0.0209899	0.0115593	2.22e-33	1.78e-86	1.11e-33	0.0331782	3.4e-41	0.0165891	6.87e-05	0.0059371	0.00300289	1.02e-05	0.0396341	0.0198222
chr1	28580919	28581056	-	ENSG00000274582	SNORA16A	snoRNA	other	stage_specific	15.5634	10.3846	12.974	1.94562	1.51e-22	0.97281	39.094	1.57029	20.3321	5.85802	4.34239	5.1002	0.000725805	2.14868	1.0747
chr1	28578748	28578822	-	ENSG00000221539	SNORD99	snoRNA	other	never	0	0	0	0	0	0	0	0	0	0	0	0	0	0	0
chr1	28589322	28643085	-	ENSG00000120656	TAF12	protein_coding	coding	constitutive	21.8124	18.0905	19.9515	16.2127	19.2979	17.7553	13.4094	13.6238	13.5166	16.4151	12.195	14.305	9.46133	11.145	10.3032
chr1	28592199	28595443	+	ENSG00000188060	RAB42	protein_coding	coding	stage_specific	3.89886	3.27954	3.5892	2.23123	2.24009	2.23566	1.41126	0.985645	1.19845	0.872327	0.587108	0.729718	0.601998	0.48195	0.541974
chr1	28643227	28648581	+	ENSG00000229388	RP11-442N24__B.1	lincRNA	lncRNA	never	0.105206	0.0629419	0.0840739	0.0485842	0	0.0242921	0.0677498	0.092339	0.0800444	0	0.111571	0.0557855	0.0263094	0.0896141	0.0579617
chr1	28648599	28648730	+	ENSG00000270103	RNU11	lincRNA	lncRNA	constitutive	13.2719	58.2045	35.7382	50.2284	71.7159	60.9721	132.671	130.858	131.764	108.927	130.071	119.499	157.13	75.4798	116.305
chr1	28648599	28648733	+	ENSG00000274978	RNU11	lincRNA	lncRNA	stage_specific	0.00320466	36.971	18.4871	0.000981796	0.00108827	0.00103503	31.1851	68.7184	49.9517	66.6796	127.361	97.0203	0.000852946	83.781	41.8909
chr1	28668731	28719353	+	ENSG00000162419	GMEB1	protein_coding	coding	constitutive	8.16551	7.83758	8.00155	11.0048	11.1007	11.0527	7.52212	6.59503	7.05858	5.59166	4.52959	5.06062	7.13232	5.87183	6.50207
chr1	28689664	28689794	+	ENSG00000252777	SCARNA24	scaRNA	other	never	0	0	0	0	0	0	0	8.3861	4.19305	0	0	0	0	0	0
chr1	28736620	28769775	+	ENSG00000198492	YTHDF2	protein_coding	coding	constitutive	91.8046	64.6763	78.2404	51.8661	78.4446	65.1553	76.265	63.8307	70.0478	78.2	61.9851	70.0926	68.1284	48.7287	58.4286
chr1	28812141	28871267	+	ENSG00000116329	OPRD1	protein_coding	coding	never	0.467392	0.536377	0.501884	0.15844	0.113066	0.135753	0.661067	0.413909	0.537488	0.208549	0.369426	0.288988	0.419999	0.487277	0.453638
chr1	28870482	28877336	-	ENSG00000233427	RP1-212P9.3	antisense	lncRNA	never	0.0545361	0.0792064	0.0668712	0.0114635	0.0218233	0.0166434	0.0685516	0.0108937	0.0397226	0.0231374	0.048951	0.0360442	0.0286887	0.0338363	0.0312625
chr1	28881725	28881835	-	ENSG00000199756	Y_RNA	misc_RNA	other	never	0	0	0	0	0	0	0	0	0	0	0	0	0	0	0
chr1	28887090	29120046	+	ENSG00000159023	EPB41	protein_coding	coding	constitutive	31.9804	33.2057	32.593	26.5861	26.2154	26.4007	55.3986	59.2707	57.3347	53.4957	56.0639	54.7798	46.334	39.5713	42.9526
chr1	29119427	29123935	-	ENSG00000253304	TMEM200B	protein_coding	coding	stage_specific	3.73776	7.36092	5.54934	15.4493	11.4232	13.4362	2.51399	1.32116	1.91758	0.609243	0.736274	0.672759	3.02934	1.84324	2.43629
chr1	28982277	28982608	-	ENSG00000225616	RP4-604A21.1	processed_pseudogene	other	never	0.263257	0.14338	0.203319	0	0.158018	0.079009	0	0.118319	0.0591595	0.194667	0	0.0973335	0.103865	0.0816673	0.0927662
chr1	28985709	28985810	-	ENSG00000206704	Y_RNA	misc_RNA	other	never	0	0	0	0	0	0	0	0	0	0	0	0	0	0	0
chr1	29041198	29041480	+	ENSG00000277958	Metazoa_SRP	misc_RNA	other	never	0.20754	0	0.10377	0.392625	0	0.196313	0	0	0	0.306934	0.248589	0.277761	0.163764	0	0.081882
chr1	29144493	29146994	-	ENSG00000225750	RP11-242O24.3	lincRNA	lncRNA	never	0	0.233706	0.116853	0	0	0	0.202268	0.385716	0.293992	0.634607	0.128494	0.381551	0	0.133116	0.066558
chr1	29147742	29181987	-	ENSG00000116350	SRSF4	protein_coding	coding	constitutive	75.206	119.806	97.506	106.51	62.4805	84.4952	108.69	86.1248	97.4074	84.7516	82.2413	83.4964	106.298	101.031	103.665
chr1	29171284	29171453	-	ENSG00000277916	uc_338	misc_RNA	other	stage_specific	9.77e-10	2.86896	1.43448	0.712894	2.89e-23	0.356447	0.000115228	0.581428	0.290772	5.21243	4.78697	4.9997	1.55302	9.21147	5.38225
chr1	29192872	29230942	-	ENSG00000116353	MECR	protein_coding	coding	constitutive	22.7225	17.1129	19.9177	16.2015	16.0494	16.1255	18.9921	17.1168	18.0544	16.9437	13.0763	15.01	16.703	13.1514	14.9272
chr1	29223932	29224816	+	ENSG00000237934	RP11-467D18.2	antisense	lncRNA	never	0	0	0	0.0277245	0	0.0138622	0	0	0	0.130042	0.131652	0.130847	0	0	0
chr1	29236515	29326813	+	ENSG00000060656	PTPRU	protein_coding	coding	constitutive	21.1504	28.1197	24.635	31.7869	30.0344	30.9107	30.4379	20.4138	25.4259	42.6106	29.1407	35.8757	68.9405	31.3139	50.1272
chr1	29329619	29350114	-	ENSG00000230523	RP3-437I16.1	lincRNA	lncRNA	never	0	0	0	0	0	0	0	0	0	0.0606135	0.0736373	0.0671254	0	0.0101715	0.00508575
chr1	29488192	29496893	-	ENSG00000225011	RP11-810H18.1	unprocessed_pseudogene	other	never	0	0	0	0	0	0	0	0	0	0	0.0689624	0.0344812	0	0.0714433	0.0357217
chr1	29708850	29709547	-	ENSG00000228176	RP4-656G21.1	lincRNA	lncRNA	never	0	0	0	0	0	0	0	0	0	0	0	0	0	0	0
chr1	29904864	29905357	-	ENSG00000270927	RP11-179G8.1	processed_pseudogene	other	never	0	0	0	0	0	0	0	0	0	0	0	0	0	0	0
chr1	30013951	30037612	-	ENSG00000233399	RP11-111I12.1	lincRNA	lncRNA	never	0	0	0	0	0	0	0.0114469	0	0.00572345	0	0	0	0	0.0075334	0.0037667
chr1	30140262	30141607	+	ENSG00000233372	RP5-893G23.1	lincRNA	lncRNA	never	0	0	0	0	0	0	0	0	0	0	0	0	0	0	0
chr1	30226522	30226615	+	ENSG00000231251	RP3-357I16.1	processed_pseudogene	other	never	0	0	0	0	0	0	0	0	0	0	0	0	0	0	0
chr1	30409559	30411638	-	ENSG00000236335	RP4-591L5.1	lincRNA	lncRNA	never	0	0	0	0	0	0	0	0	0	0	0	0	0	0	0
chr1	30415824	30421108	+	ENSG00000231949	RP4-591L5.2	lincRNA	lncRNA	never	0	0	0	0	0	0	0	0	0	0	0	0	0	0	0
chr1	30711276	30723587	-	ENSG00000162510	MATN1	protein_coding	coding	never	0.0651121	0.100282	0.082697	0.0616541	0.0524438	0.057049	0.0337985	0.0348897	0.0343441	0.0153157	0.0198189	0.0175673	0.0924866	0.0163192	0.0544029
chr1	30718503	30726827	+	ENSG00000186056	MATN1-AS1	antisense	lncRNA	never	0.111505	0.451512	0.281508	0.124197	0.280084	0.202141	0.249462	0.0786579	0.16406	0.253186	0.127264	0.190225	0.249867	0.0887036	0.169285
chr1	30732468	30757820	-	ENSG00000162511	LAPTM5	protein_coding	coding	never	0.150529	0.278144	0.214337	0.0149288	0.0511839	0.0330563	0.0401949	0.0141927	0.0271938	0.0116706	0.00472606	0.00819833	0.0655332	0.0397628	0.052648
chr1	30739155	30739232	-	ENSG00000264773	MIR4420	miRNA	other	never	0	0	0	0	0	0	0	0	0	0	0	0	0	0	0
chr1	30810377	30815553	-	ENSG00000229607	RP5-1125N11.1	lincRNA	lncRNA	never	0	0	0	0	0	0	0	0	0	0	0	0	0	0	0
chr1	30824227	30834431	+	ENSG00000223382	RP5-1125N11.2	lincRNA	lncRNA	never	0.0354241	0.00964664	0.0225354	0.0167912	0	0.0083956	0	0	0	0	0.0159469	0.00797345	0.0419284	0	0.0209642
chr1	30843822	30844110	+	ENSG00000222784	RN7SKP91	misc_RNA	other	never	0	0	0	0	0	0	0	0	0	0	0	0	0	0	0
chr1	30858157	30860254	+	ENSG00000235143	RP1-65J11.5	antisense	lncRNA	never	0	0	0	0	0	0	0	0	0	0	0	0	0	0	0
chr1	30869466	30908761	-	ENSG00000162512	SDC3	protein_coding	coding	constitutive	9.9257	13.1307	11.5282	21.864	17.3966	19.6303	17.7712	17.4108	17.591	13.1896	11.6707	12.4301	14.3731	11.2677	12.8204
chr1	30918468	30918735	-	ENSG00000266210	RN7SL371P	misc_RNA	other	never	0	0	0	0	0	0	0	0	0	0	0	0	0	0	0
chr1	30931505	31065991	-	ENSG00000134644	PUM1	protein_coding	coding	constitutive	89.3412	61.0591	75.2001	70.7457	84.5482	77.647	110.407	98.1107	104.259	121.819	77.4449	99.632	133.022	70.6666	101.844
chr1	31036733	31037240	+	ENSG00000237329	RP11-201O14.1	processed_pseudogene	other	never	0	0	0	0	0	0	0	0	0	0.238712	0.837785	0.538249	0	0.0333817	0.0166909
chr1	31050871	31051034	+	ENSG00000232768	RP11-201O14.2	processed_pseudogene	other	pp1_restricted	0	0	0	0	0	0	0	0	0	5.50096	10.0244	7.76268	0	0	0
chr1	31094986	31095558	-	ENSG00000215900	SELENOWP1	processed_pseudogene	other	never	0	0.163244	0.081622	0	0	0	0	0	0	0	0	0	0	0	0
chr1	31108187	31108623	-	ENSG00000225142	RP11-490K7.1	processed_pseudogene	other	never	0	0	0	0	0.0850679	0.042534	0	0	0	0	0	0	0	0	0
chr1	31179744	31239554	-	ENSG00000084628	NKAIN1	protein_coding	coding	constitutive	31.7279	27.0818	29.4048	7.75118	9.82466	8.78792	24.8487	19.421	22.1349	14.1363	9.9565	12.0464	11.8489	6.62077	9.23484
chr1	31259567	31296782	-	ENSG00000060688	SNRNP40	protein_coding	coding	constitutive	50.1086	39.7891	44.9489	24.9307	40.0596	32.4952	42.0598	41.428	41.7439	33.2199	28.4055	30.8127	33.4775	32.046	32.7617
chr1	31263244	31263681	-	ENSG00000229447	RP11-490K7.4	processed_pseudogene	other	pp1_restricted	0.282185	1.15266	0.717422	0.845244	0.762208	0.803726	0.931101	1.22599	1.07855	1.04332	1.05624	1.04978	0.612328	1.05047	0.831399
chr1	31296981	31364953	+	ENSG00000121766	ZCCHC17	protein_coding	coding	constitutive	44.6846	31.2129	37.9487	23.2495	32.7813	28.0154	21.7572	22.2853	22.0212	35.7307	23.4318	29.5813	25.5946	25.7065	25.6505
chr1	31333066	31346799	-	ENSG00000229044	RP11-266K22.2	antisense	lncRNA	never	0	0.114251	0.0571255	0	0	0	0	0.0419029	0.0209514	0	2.63e-17	1.31e-17	0	0.0433839	0.021692
chr1	31365624	31376850	-	ENSG00000121769	FABP3	protein_coding	coding	stage_specific	13.8297	13.8863	13.858	3.99436	5.35922	4.67679	0.655959	0.320941	0.48845	1.53537	1.70895	1.62216	1.32736	0.722818	1.02509
chr1	31409564	31434680	+	ENSG00000168528	SERINC2	protein_coding	coding	constitutive	19.5361	21.3032	20.4197	25.6797	25.33	25.5049	22.0441	15.149	18.5966	61.304	51.9415	56.6228	47.8673	30.2237	39.0455
chr1	31487588	31488930	-	ENSG00000215899	RP11-439L8.2	processed_pseudogene	other	never	0	0.00127482	0.00063741	0	0	0	0.00970932	0.0129046	0.011307	0.00415399	0.0140182	0.0090861	0.0108971	0.00290449	0.0069008
chr1	31497576	31497683	-	ENSG00000206981	RNU6-40P	snRNA	other	never	0	0	0	0	0	0	0	0	0	0	0	0	0	0	0
chr1	31500084	31509648	+	ENSG00000260386	LINC01225	transcribed_unitary_pseudogene	other	never	0.0251108	0.0136763	0.0193935	0.0529121	0.130029	0.0914705	0	0.00500199	0.002501	0.0342136	0.053017	0.0436153	0	0.00517939	0.00258969
chr1	31503630	31503744	-	ENSG00000265961	Y_RNA	misc_RNA	other	never	0	0	0	0	0	0	0	0	0	0	0	0	0	0	0
chr1	31571584	31575573	-	ENSG00000229167	RP11-73M7.1	antisense	lncRNA	never	0.0418769	0.0456154	0.0437461	0	0	0	0	0	0	0.0619322	0.0501596	0.0560459	0	0	0
chr1	31576484	31587686	+	ENSG00000142910	TINAGL1	protein_coding	coding	es_restricted	2.39086	3.94434	3.1676	0.780475	0.540547	0.660511	0.417896	0.138407	0.278151	0.55512	0.818195	0.686658	0.928838	0.949585	0.939211
chr1	31617685	31632518	+	ENSG00000121764	HCRTR1	protein_coding	coding	never	0.107272	0.115457	0.111365	0.0469908	0.0127689	0.0298798	0.0467091	0.0265492	0.0366291	0.0314608	0.0793592	0.05541	0.0175137	0.0134148	0.0154643
chr1	31644048	31660162	+	ENSG00000235790	RP11-73M7.6	antisense	lncRNA	never	0.0334828	0	0.0167414	0.0569985	0	0.0284993	0.0309776	0	0.0154888	0.150797	0.107488	0.129142	0.0197834	0.0306893	0.0252364
chr1	31644693	31649371	+	ENSG00000264078	RP11-73M7.9	antisense	lncRNA	never	0.059225	0.0322561	0.0457405	0.0373473	0	0.0186736	0.0558341	0	0.027917	0.0875886	0.248286	0.167937	0.0467329	0.0367454	0.0417392
chr1	31629861	31644896	-	ENSG00000162517	PEF1	protein_coding	coding	constitutive	35.1821	25.6843	30.4332	35.397	49.2442	42.3206	35.4979	32.899	34.1985	48.0753	32.7883	40.4318	38.489	33.5282	36.0086
chr1	31652246	31704319	-	ENSG00000084636	COL16A1	protein_coding	coding	stage_specific	4.86282	6.89232	5.87757	1.20519	1.69763	1.45141	0.771435	0.756713	0.764074	1.33121	0.902755	1.11698	1.09686	0.189542	0.643201
chr1	31727116	31764893	-	ENSG00000121753	ADGRB2	protein_coding	coding	constitutive	3.55206	7.63785	5.59495	3.91117	2.28902	3.1001	2.66845	1.86648	2.26747	3.17846	3.15468	3.16657	4.68915	3.01452	3.85183
chr1	31758659	31758735	-	ENSG00000266580	MIR4254	miRNA	other	never	0	0	0	0	0	0	0	0	0	0	0	0	0	0	0
chr1	31789129	31791322	+	ENSG00000254545	RP11-84A19.3	antisense	lncRNA	never	0	0.013299	0.0066495	0	0	0	0	0	0	0.00214453	0.0521679	0.0271562	0	0	0
chr1	31790421	31816051	-	ENSG00000134668	SPOCD1	protein_coding	coding	never	0.641555	1.40009	1.02082	1.67165	0.657809	1.16473	0.509554	0.591905	0.550729	0.999029	1.23632	1.11767	0.485731	0.552989	0.51936
chr1	31842018	31855568	-	ENSG00000203620	RP11-84A19.2	lincRNA	lncRNA	never	0	0	0	0	0	0	0	0	0	0.0114765	0	0.00573825	0	0	0
chr1	31851912	31921841	-	ENSG00000269967	RP11-84A19.4	lincRNA	lncRNA	never	0	0.0922041	0.046102	0.346961	0.0508089	0.198885	0.0399004	0.304353	0.172127	0	0.253473	0.126737	0.0667929	0.472665	0.269729
chr1	31906420	31944856	-	ENSG00000184007	PTP4A2	protein_coding	coding	constitutive	175.444	153.214	164.329	208.317	228.292	218.304	177.283	175.755	176.519	169.444	155.423	162.434	176.838	185.717	181.278
chr1	31933019	31933975	+	ENSG00000228634	RP4-534N18.2	lincRNA	lncRNA	never	0	0	0	0	0.0624721	0.0312361	0	0	0	0.307845	0.405156	0.3565	0	0.064574	0.032287
chr1	32013828	32060850	+	ENSG00000121774	KHDRBS1	protein_coding	coding	constitutive	125.272	89.1078	107.19	83.3967	105.277	94.3368	128.207	98.6414	113.424	107.909	79.3232	93.6161	107.777	78.004	92.8905
chr1	32052290	32073474	-	ENSG00000203325	RP11-277A4.4	antisense	lncRNA	never	0	0.0594451	0.0297226	0	0.069368	0.034684	0	0	0	0.227884	0.357596	0.29274	0	0.0557682	0.0278841
chr1	32072030	32102866	+	ENSG00000121775	TMEM39B	protein_coding	coding	constitutive	12.902	9.9094	11.4057	9.76248	9.61512	9.6888	11.1714	10.6328	10.9021	10.8059	7.8894	9.34765	14.9644	9.32523	12.1448
chr1	32086948	32087007	+	ENSG00000266203	MIR5585	miRNA	other	never	0	0	0	0	0	0	0	0	0	0	0	0	0	0	0
chr1	32087522	32087813	+	ENSG00000276493	Metazoa_SRP	misc_RNA	other	never	0	0	0	0	0	0	0	0	0	0	0	0	0	0	0
chr1	32108037	32176568	+	ENSG00000025800	KPNA6	protein_coding	coding	constitutive	20.3738	21.2322	20.803	18.7235	17.0452	17.8844	15.8389	17.5473	16.6931	13.7433	17.4771	15.6102	12.9931	16.2684	14.6308
chr1	32170732	32176568	+	ENSG00000250135	RP4-622L5.2	sense_intronic	lncRNA	never	0.194088	1.63847	0.916279	0.202733	0.000435279	0.101584	0.232327	0.520196	0.376262	0.763453	1.32239	1.04292	1.74936	0.000705763	0.875033
chr1	32179685	32198285	+	ENSG00000084652	TXLNA	protein_coding	coding	constitutive	15.0907	13.414	14.2523	10.7689	11.7759	11.2724	12.6746	11.614	12.1443	13.3592	13.2336	13.2964	17.4713	15.0038	16.2375
chr1	32200385	32205387	+	ENSG00000160050	CCDC28B	protein_coding	coding	constitutive	13.3093	12.1297	12.7195	7.72884	7.59997	7.66441	9.37096	9.22988	9.30042	11.4931	7.91578	9.70444	11.6739	10.6195	11.1467
chr1	32205660	32208687	+	ENSG00000160051	IQCC	protein_coding	coding	constitutive	2.16981	1.36587	1.76784	1.22173	1.20028	1.21101	2.53592	2.07602	2.30597	2.61123	2.26513	2.43818	2.92494	2.17309	2.54901
chr1	32204768	32206814	-	ENSG00000224066	RP4-622L5.7	antisense	lncRNA	pp2_restricted	0.0552981	0.30139	0.178344	0.924665	0.431817	0.678241	1.16499	0.663311	0.91415	1.76636	0.87631	1.32133	1.80497	1.64839	1.72668
chr1	32209093	32216196	+	ENSG00000222046	DCDC2B	protein_coding	coding	never	0	0.00760182	0.00380091	0.0121228	0.0167559	0.0144394	0.0263169	0.00576012	0.0160385	0.348284	0.554519	0.451402	0.0455078	0.0178911	0.0316994
chr1	32221927	32231604	+	ENSG00000084623	EIF3I	protein_coding	coding	constitutive	151.367	83.2874	117.327	85.5314	146.735	116.133	88.1903	62.6591	75.4247	83.8258	48.5104	66.1681	81.8372	54.4329	68.1351
chr1	32214471	32222359	-	ENSG00000160055	TMEM234	protein_coding	coding	constitutive	8.92804	5.47066	7.19935	8.01254	9.77678	8.89466	8.46122	5.67203	7.06663	14.462	12.4544	13.4582	15.4621	11.3709	13.4165
chr1	32231657	32241620	-	ENSG00000220785	MTMR9LP	transcribed_unprocessed_pseudogene	other	constitutive	3.74738	3.84197	3.79467	1.8901	1.80804	1.84907	9.97603	7.79108	8.88355	14.2886	10.2569	12.2728	13.6923	8.86351	11.2779
chr1	32247232	32248856	+	ENSG00000183615	FAM167B	protein_coding	coding	stage_specific	1.66593	3.39652	2.53123	1.46523	0.526298	0.995764	1.73587	1.64198	1.68893	2.30168	2.03482	2.16825	2.21397	1.25121	1.73259
chr1	32251238	32286165	+	ENSG00000182866	LCK	protein_coding	coding	stage_specific	32.9438	32.1544	32.5491	3.85758	2.13587	2.99673	0.37254	0.219406	0.295973	0.201913	0.120874	0.161393	0.519473	0.339158	0.429316
chr1	32269337	32269597	+	ENSG00000277617	Metazoa_SRP	misc_RNA	other	never	0	0	0	0	0	0	0	0	0	0	0	0	0	0	0
chr1	32286451	32286561	-	ENSG00000252450	Y_RNA	misc_RNA	other	never	0	0	0	0	0	0	0	0	0	0	0	0	0	0	0
chr1	32292085	32333635	+	ENSG00000116478	HDAC1	protein_coding	coding	constitutive	82.348	61.8154	72.0817	75.2145	96.4387	85.8266	87.9711	64.4856	76.2284	84.7627	54.5868	69.6748	79.8915	61.5034	70.6975
chr1	32333831	32336379	-	ENSG00000175130	MARCKSL1	protein_coding	coding	constitutive	282.729	223.973	253.351	289.555	307.145	298.35	396.793	352.512	374.652	475.235	444.943	460.089	600.539	482.794	541.667
chr1	32349193	32350663	-	ENSG00000233775	RP4-811H24.9	lincRNA	lncRNA	never	0	0.0363952	0.0181976	0.0210698	0.040111	0.0305904	0.0314993	0.0400453	0.0357723	0.0988279	0.0200104	0.0594191	0.0790944	0.0621909	0.0706427
chr1	32351520	32364312	+	ENSG00000162526	TSSK3	protein_coding	coding	pp1_restricted	0.444629	1.27158	0.858105	1.34588	0.461182	0.903531	0.956098	1.32272	1.13941	2.2113	2.17562	2.19346	0.606265	1.3535	0.979882
chr1	32361269	32364278	-	ENSG00000225828	FAM229A	protein_coding	coding	constitutive	1.71141	2.37549	2.04345	4.42687	3.01948	3.72317	4.76103	3.88959	4.32531	8.73778	8.64367	8.69073	8.66857	5.71979	7.19418
chr1	32365102	32394731	-	ENSG00000160058	BSDC1	protein_coding	coding	constitutive	18.2883	16.772	17.5301	25.654	24.9184	25.2862	22.1777	19.5209	20.8493	39.8191	35.6198	37.7195	32.9585	27.1212	30.0399
chr1	32402108	32403115	-	ENSG00000224333	GAPDHP20	processed_pseudogene	other	never	0	0	0	0.365061	0.191717	0.278389	0	0	0	0.0295227	0.0478214	0.038672	0	0	0
chr1	32421978	32422319	+	ENSG00000270850	RP11-395N6.4	processed_pseudogene	other	never	0	0	0	0.153838	0	0.076919	0	0	0	0	0	0	0	0	0
chr1	32423213	32426789	-	ENSG00000229259	LRRC37A12P	unprocessed_pseudogene	other	de_restricted	0.129833	0.0815905	0.105712	4.09363	2.84149	3.46756	0.00941533	0	0.00470766	0	0.0119625	0.00598125	0	0.0061964	0.0030982
chr1	32457834	32458135	+	ENSG00000263529	RN7SL122P	misc_RNA	other	never	0	0	0	0.538544	0.205047	0.371796	0	0	0	0	0	0	0	0	0
chr1	32465056	32600792	+	ENSG00000254553	RP1-27O5.3	protein_coding	coding	stage_specific	1.74682	1.53044	1.63863	2.72104	2.94814	2.83459	1.07674	0.717498	0.897119	1.1527	0.575039	0.863869	2.0755	1.25295	1.66423
chr1	32465068	32496686	+	ENSG00000273274	ZBTB8B	protein_coding	coding	pp2_restricted	0.583886	0.776554	0.68022	1.27977	0.866206	1.07299	0.805128	1.0116	0.908364	0.79193	0.742462	0.767196	1.04601	1.13012	1.08807
chr1	32539426	32605939	+	ENSG00000160062	ZBTB8A	protein_coding	coding	constitutive	2.93852	3.22362	3.08107	8.16089	5.98854	7.07472	5.35057	7.31679	6.33368	3.16699	4.01212	3.58955	2.15714	3.86103	3.00908
chr1	32600171	32650903	-	ENSG00000176261	ZBTB8OS	protein_coding	coding	constitutive	50.8376	34.352	42.5948	51.4066	76.1685	63.7876	28.7365	26.4416	27.5891	30.4832	30.0168	30.25	30.0859	30.5017	30.2938
chr1	32639950	32640052	-	ENSG00000200591	Y_RNA	misc_RNA	other	never	0	0	0	0	0	0	0	0	0	0	92.1511	46.0755	0	0	0
chr1	32651141	32686211	+	ENSG00000162521	RBBP4	protein_coding	coding	constitutive	204.464	131.414	167.939	197.052	275.781	236.417	235.07	190.325	212.697	205.22	120.55	162.885	186.79	126.811	156.8
chr1	32680359	32703596	-	ENSG00000162520	SYNC	protein_coding	coding	never	0.137649	0.0465069	0.092078	0.200873	0.105036	0.152954	0.0431068	0.055375	0.0492409	2.89e-80	0.206696	0.103348	0.108558	0.115676	0.112117
chr1	32717733	32725237	-	ENSG00000224409	RP11-114B7.6	antisense	lncRNA	never	0	0	0	0.109335	0.104072	0.106704	0	0.0519505	0.0259752	0	0.103838	0.051919	0	0	0
chr1	32741884	32774970	+	ENSG00000162522	KIAA1522	protein_coding	coding	constitutive	20.3649	21.6691	21.017	14.3281	10.5681	12.4481	26.3118	22.5908	24.4513	39.4412	45.4737	42.4575	41.4112	30.9965	36.2039
chr1	32775236	32818153	-	ENSG00000134684	YARS	protein_coding	coding	constitutive	75.3394	82.239	78.7892	84.3537	84.0352	84.1945	37.9844	32.6832	35.3338	14.8033	13.842	14.3226	23.126	19.0818	21.1039
chr1	32816766	32858879	+	ENSG00000116497	S100PBP	protein_coding	coding	constitutive	20.278	22.3675	21.3227	32.8307	26.374	29.6024	12.8203	17.2595	15.0399	16.1922	15.0758	15.634	14.0263	16.9413	15.4838
chr1	32862267	32872482	-	ENSG00000160097	FNDC5	protein_coding	coding	stage_specific	0.62797	0.675472	0.651721	0.552991	0.752581	0.652786	2.47364	2.26564	2.36964	2.8174	1.60745	2.21243	4.34869	3.43788	3.89329
chr1	32885993	32898441	+	ENSG00000121905	HPCA	protein_coding	coding	stage_specific	0.792866	1.10524	0.949053	0.433405	0.123141	0.278273	2.28788	1.58105	1.93447	0.41728	0.376182	0.396731	3.46261	3.50809	3.48535
chr1	32894593	32901438	-	ENSG00000121900	TMEM54	protein_coding	coding	constitutive	7.6919	17.5182	12.6051	6.8583	3.03192	4.94511	90.897	52.8623	71.8796	27.7135	15.9129	21.8132	25.9368	16.5865	21.2616
chr1	32936444	32964685	-	ENSG00000116514	RNF19B	protein_coding	coding	constitutive	4.94725	4.7415	4.84438	6.91283	7.59238	7.2526	3.4953	3.79928	3.64729	5.43616	4.92184	5.179	6.68842	4.7078	5.69811
chr1	32973552	32974463	+	ENSG00000278966	RP5-1174N9.2	TEC	lncRNA	never	0	0.110308	0.055154	0.0919499	0.0583349	0.0751424	0.137465	0.114861	0.126163	0.21439	0.253632	0.234011	0.332389	0.00228678	0.167338
chr1	32979946	32980472	+	ENSG00000217644	RP4-803A2.1	processed_pseudogene	other	never	0	0.0275299	0.0137649	0	0	0	0	0	0	0	0.0302724	0.0151362	0	0	0
chr1	32986951	32988233	+	ENSG00000239670	RP4-803A2.2	unprocessed_pseudogene	other	never	0	0	0	0	0	0	0	0	0	1.43e-38	0.0512079	0.025604	0	0	0
chr1	32987074	33032469	+	ENSG00000236065	RP1-117O3.2	antisense	lncRNA	never	0	0.00588772	0.00294386	0	0	0	0	0	0	0.0479627	0.0491761	0.0485694	0	0.00670716	0.00335358
chr1	33007939	33080996	-	ENSG00000004455	AK2	protein_coding	coding	constitutive	116.154	71.1128	93.6334	37.6578	82.1925	59.9252	87.4707	59.895	73.6829	45.7013	36.1693	40.9353	49.3798	45.9067	47.6433
chr1	33029231	33029576	+	ENSG00000276645	Metazoa_SRP	misc_RNA	other	never	0	0.129049	0.0645245	0.0747088	0	0.0373544	0.111689	0.141991	0.12684	0.17521	0	0.087605	0.0934835	0.220515	0.156999
chr1	33081103	33120530	+	ENSG00000142920	AZIN2	protein_coding	coding	stage_specific	0.269783	0.333589	0.301686	0.924837	0.762982	0.843909	3.26601	1.6027	2.43436	3.25668	1.49099	2.37384	3.43448	1.69486	2.56467
chr1	33141870	33143230	-	ENSG00000278997	RP11-131M11.2	TEC	lncRNA	never	0.0552954	0.195754	0.125525	0.0958906	0	0.0479453	0.117291	0.140829	0.12906	0.163554	0.223533	0.193544	0.174528	0.145806	0.160167
chr1	33145401	33182059	-	ENSG00000116525	TRIM62	protein_coding	coding	constitutive	4.80284	7.63615	6.2195	2.10969	1.75839	1.93404	3.15762	2.7426	2.95011	2.58453	2.37916	2.48184	3.87415	2.39685	3.1355
chr1	33162850	33166298	+	ENSG00000279179	RP11-131M11.3	TEC	lncRNA	never	0.0147119	0.0160253	0.0153686	0.00618491	0	0.00309246	0.023116	0.0205713	0.0218436	0.123294	0.254616	0.188955	0.0038696	0.0152131	0.00954135
chr1	33256544	33300719	+	ENSG00000160094	ZNF362	protein_coding	coding	constitutive	20.0633	20.1357	20.0995	17.3522	13.1459	15.2491	28.4279	29.0756	28.7518	35.1677	26.8226	30.9951	47.5532	28.3108	37.932
chr1	33261211	33261680	+	ENSG00000270115	RP11-415J8.7	lincRNA	lncRNA	stage_specific	0.308802	0.9082	0.608501	0.895762	0.444855	0.670308	1.22271	1.7765	1.49961	1.37008	1.88638	1.62823	1.12087	2.22248	1.67168
chr1	33306765	33321098	-	ENSG00000184389	A3GALT2	protein_coding	coding	never	0	0	0	0	0	0	0.0184482	0.0234532	0.0209507	0.0868205	0.0351584	0.0609895	0.0617641	0	0.0308821
chr1	33323622	33431052	-	ENSG00000134686	PHC2	protein_coding	coding	constitutive	2.39651	3.48942	2.94297	7.56593	7.9837	7.77482	72.7085	59.4071	66.0578	70.59	56.4516	63.5208	179.673	59.6309	119.652
chr1	33307347	33349245	+	ENSG00000225313	RP11-415J8.3	antisense	lncRNA	pp1_restricted	0.121689	0.0414056	0.0815473	0.0925141	0	0.0462571	0.0687764	0.0258431	0.0473097	6.62204	9.50233	8.06218	0.0829288	0.172247	0.127588
chr1	33336565	33336864	-	ENSG00000222112	RN7SKP16	misc_RNA	other	stage_specific	0	0.284519	0.14226	0.98828	0.209045	0.598662	5.41741	4.59145	5.00443	5.92316	8.65587	7.28951	13.8778	14.2612	14.0695
chr1	33350351	33363245	+	ENSG00000233246	RP11-415J8.5	antisense	lncRNA	never	0	0.0621912	0.0310956	0	0	0	0.161476	0.376356	0.268916	0.0844373	0.170967	0.127702	0	0.247964	0.123982
chr1	33466248	33468954	+	ENSG00000234512	TLR12P	unitary_pseudogene	other	never	0	0	0	0	0	0	0	0	0	0	0	0	0	0	0
chr1	33472644	33496507	+	ENSG00000121903	ZSCAN20	protein_coding	coding	stage_specific	0.743403	0.759543	0.751473	0.912449	1.2454	1.07892	1.38703	1.51356	1.45029	1.778	1.46038	1.61919	1.6216	1.75617	1.68888
chr1	33512007	33512743	-	ENSG00000235907	RP4-580O19.2	processed_pseudogene	other	never	0.0302876	0	0.0151438	0	0	0	0	0	0	0.0447927	0.0544171	0.0496049	0	0	0
chr1	33513998	34165842	-	ENSG00000121904	CSMD2	protein_coding	coding	es_restricted	2.73842	3.49468	3.11655	0.0850309	0.192197	0.138614	0.140287	0.0611193	0.100703	0.0610629	0.080267	0.070665	0.200239	0.116811	0.158525
chr1	33838522	33840140	+	ENSG00000227000	HSPD1P14	processed_pseudogene	other	never	0	0	0	0	0	0	0	0	0	0	0	0	0	0	0
chr1	33860474	33864791	+	ENSG00000176256	HMGB4	protein_coding	coding	never	0	0	0	0	0	0	0	0	0	0	0	0	0	0	0
chr1	33868952	33885458	+	ENSG00000231163	CSMD2-AS1	antisense	lncRNA	never	0	0	0	0	0	0	0	0	0	0	0	0	0	0.0226888	0.0113444
chr1	34112948	34113063	+	ENSG00000201148	RNA5SP42	rRNA	other	never	0	0	0	0	0	0	0	11.128	5.564	0	0	0	0	0	0
chr1	34166882	34219131	+	ENSG00000142698	C1orf94	protein_coding	coding	es_restricted	1.80595	1.27724	1.5416	0.0156033	0	0.00780165	0.0648906	0.128326	0.0966083	0.0365935	0.0444573	0.0405254	0.0325412	0.0153518	0.0239465
chr1	34276858	34277292	-	ENSG00000270241	RP4-657M3.2	processed_pseudogene	other	never	0	0	0	0	0	0	0	0	0	0	0	0	0	0	0
chr1	34669598	34669694	-	ENSG00000207941	MIR552	miRNA	other	never	0	0	0	0	0	0	0	0	0	0	0	0	0	0	0
chr1	34712736	34859816	-	ENSG00000163866	SMIM12	protein_coding	coding	constitutive	27.0152	20.016	23.5156	21.0269	30.2867	25.6568	14.879	12.1069	13.493	19.968	15.7406	17.8543	22.4264	19.6053	21.0159
chr1	34755046	34758512	+	ENSG00000189280	GJB5	protein_coding	coding	never	0.111075	0.143676	0.127376	0.113821	0.0833396	0.0985803	0.0261788	0	0.0130894	0.0410674	0.0748371	0.0579522	0.0219115	0.0172287	0.0195701
chr1	34759740	34763724	+	ENSG00000189433	GJB4	protein_coding	coding	never	0.0181157	0.00657765	0.0123467	0.102814	0.036246	0.06953	0.0113857	0.021712	0.0165489	7.96e-09	0.0209425	0.0104713	0.0142946	0	0.0071473
chr1	34761425	34788097	-	ENSG00000255811	RP1-34M23.5	antisense	lncRNA	never	0	0	0	0.0287604	0.109503	0.0691317	0	0	0	0.06745	0.0876545	0.0775523	0	0	0
chr1	34781188	34786369	+	ENSG00000188910	GJB3	protein_coding	coding	never	0.320284	0.34722	0.333752	0.470097	0.710562	0.590329	0.00943874	0.0119997	0.0107192	0.0296142	0.0419852	0.0357997	0.292151	0.265245	0.278698
chr1	34792997	34795747	+	ENSG00000187513	GJA4	protein_coding	coding	stage_specific	1.12012	1.2656	1.19286	14.9334	8.81783	11.8756	0.116718	0.145515	0.131116	0.856161	0.705045	0.780603	5.98534	6.01241	5.99887
chr1	34850693	34851555	+	ENSG00000230163	RP5-997D16.2	antisense	lncRNA	pp1_restricted	0	0	0	0.059103	0.0375051	0.0483041	0	0	0	1.2475	1.75878	1.50314	0	0.038767	0.0193835
chr1	34865435	34929585	-	ENSG00000116544	DLGAP3	protein_coding	coding	stage_specific	3.47566	4.36358	3.91962	0.723233	0.969802	0.846518	0.478396	0.354938	0.416667	0.41712	0.320263	0.368692	2.42358	1.18273	1.80316
chr1	34974355	34985313	-	ENSG00000241014	RP11-244H3.1	processed_transcript	lncRNA	stage_specific	0.293022	0.814336	0.553679	1.36269	0.761547	1.06212	1.74307	1.17735	1.46021	1.60232	1.34668	1.4745	1.50596	1.04366	1.27481
chr1	34981532	35031741	-	ENSG00000271741	RP11-244H3.4	protein_coding	coding	stage_specific	1.48209	1.53806	1.51008	1.40317	1.38654	1.39485	0.641373	1.08028	0.860827	2.10266	0.970246	1.53645	1.357	1.00511	1.18105
chr1	34981534	34985353	-	ENSG00000243749	TMEM35B	protein_coding	coding	constitutive	9.74952	8.59709	9.1733	21.8026	20.4284	21.1155	12.0558	11.8073	11.9315	12.165	10.2869	11.2259	7.59513	9.04867	8.3219
chr1	34986164	35031968	-	ENSG00000163867	ZMYM6	protein_coding	coding	constitutive	4.9498	5.18362	5.06671	5.42718	4.90964	5.16841	5.04671	4.27528	4.66099	8.69023	9.12138	8.90581	7.44674	6.8344	7.14057
chr1	35053467	35059271	+	ENSG00000233940	RPL12P45	processed_pseudogene	other	never	0	0	0	0	0	0	0	0	0	0	0	0	0	0	0
chr1	35059785	35115859	+	ENSG00000197056	ZMYM1	protein_coding	coding	constitutive	6.03407	6.92977	6.48192	7.64782	5.91046	6.77914	3.68358	9.95471	6.81914	3.94799	6.12385	5.03592	4.03054	6.18072	5.10563
chr1	35122021	35122484	+	ENSG00000228348	EFCAB14P1	processed_pseudogene	other	never	0.347804	0.223868	0.285836	0.598161	0.151831	0.374996	0.447124	0.378954	0.413039	0.280567	0.49234	0.386454	0.498987	0.333495	0.416241
chr1	35176377	35193148	-	ENSG00000116560	SFPQ	protein_coding	coding	constitutive	357.13	204.549	280.839	226.815	266.139	246.477	367.2	355.628	361.414	307.346	279.829	293.587	389.747	308.537	349.142
chr1	35195968	35196062	-	ENSG00000201868	Y_RNA	misc_RNA	other	never	0	0	0	0	0	0	0	0	0	0	0	0	0	0	0
chr1	35268966	35422058	+	ENSG00000146463	ZMYM4	protein_coding	coding	constitutive	22.2184	20.9778	21.5981	35.7077	32.0058	33.8567	20.0013	28.9905	24.4959	28.1521	24.6829	26.4175	20.9612	19.8656	20.4134
chr1	35358821	35366077	-	ENSG00000227409	ZMYM4-AS1	antisense	lncRNA	never	0.0642614	0.104998	0.0846297	0.48628	0.0771449	0.281712	0.181747	0.0385092	0.110128	0.133527	2.2e-76	0.0667635	0.101414	0.358832	0.230123
chr1	35292195	35292498	-	ENSG00000240374	RN7SL503P	misc_RNA	other	never	0	0	0	0	0	0	0	0	0	0.247837	0.602178	0.425007	0	0	0
chr1	35310273	35310425	+	ENSG00000201542	SNORA62	snoRNA	other	never	0	1.4634	0.7317	3.38876	0	1.69438	0	0	0	0	1.60918	0.80459	0	1.66707	0.833535
chr1	35350721	35351607	+	ENSG00000229994	RPL5P4	processed_pseudogene	other	constitutive	46.9387	30.5714	38.755	23.5855	38.8966	31.2411	55.5354	55.0812	55.3083	53.4228	33.654	43.5384	27.1917	25.9843	26.588
chr1	35399996	35400319	+	ENSG00000278702	Metazoa_SRP	misc_RNA	other	never	0	0	0	0	0	0	0	0	0	0	0	0	0	0	0
chr1	35433489	35557950	-	ENSG00000142687	KIAA0319L	protein_coding	coding	constitutive	27.79	41.6745	34.7323	31.6698	27.1073	29.3885	26.0393	26.44	26.2397	31.0126	31.6542	31.3334	31.503	25.6647	28.5839
chr1	35557472	35567274	+	ENSG00000020129	NCDN	protein_coding	coding	constitutive	19.756	13.2774	16.5167	9.9105	14.2112	12.0609	8.37947	5.97664	7.17805	8.31767	8.69208	8.50488	8.78619	6.65276	7.71948
chr1	35509741	35511438	+	ENSG00000236274	RP4-728D4.3	processed_pseudogene	other	never	0	0	0	0	0	0	0	0	0	0	0.0961266	0.0480633	0	0	0
chr1	35569812	35577729	-	ENSG00000239636	RP4-728D4.2	antisense	lncRNA	pp1_restricted	0.453261	0.465349	0.459305	0.410925	0.524831	0.467878	0.635597	0.133787	0.384692	1.31421	1.01742	1.16582	0.824048	0.797979	0.811014
chr1	35573369	35595328	+	ENSG00000116819	TFAP2E	protein_coding	coding	never	0.0642163	0.174873	0.119545	0.237907	0.0481817	0.143044	0.0681071	0.0625335	0.0653203	0.154327	0.254789	0.204558	0.0633392	0.0846648	0.074002
chr1	35599543	35641844	-	ENSG00000126067	PSMB2	protein_coding	coding	constitutive	81.0633	51.3102	66.1868	31.0014	50.048	40.5247	44.6137	44.5093	44.5615	62.6749	55.7239	59.1994	65.2397	54.6123	59.926
chr1	35713874	35719472	-	ENSG00000142686	C1orf216	protein_coding	coding	constitutive	4.62819	3.8844	4.25629	2.77639	3.60053	3.18846	2.86968	2.27	2.56984	2.81658	1.72163	2.26911	3.18477	2.08931	2.63704
chr1	35720217	35769967	-	ENSG00000092853	CLSPN	protein_coding	coding	constitutive	12.8446	11.9797	12.4122	4.62254	6.76347	5.69301	9.26969	11.7627	10.5162	3.87932	2.40784	3.14358	10.1442	13.0919	11.6181
chr1	35739388	35743576	+	ENSG00000232335	RP11-435D7.3	antisense	lncRNA	never	0	0.0528705	0.0264353	0.0306077	0	0.0153039	0.0457584	0.0290864	0.0374224	0.231296	0.179778	0.205537	0	0.0602288	0.0301144
chr1	35808171	35857890	+	ENSG00000134698	AGO4	protein_coding	coding	constitutive	8.18522	5.51586	6.85054	11.9916	13.7199	12.8558	21.8045	24.4062	23.1054	24.695	22.4432	23.5691	20.3244	17.556	18.9402
chr1	35869807	35930528	+	ENSG00000092847	AGO1	protein_coding	coding	constitutive	16.1595	15.6354	15.8974	9.53859	7.60494	8.57176	11.6328	14.6661	13.1494	22.9049	23.8776	23.3912	17.2683	14.7281	15.9982
chr1	35929719	35930115	-	ENSG00000271914	RP4-789D17.5	lincRNA	lncRNA	never	0.0862232	0.0939208	0.090072	0.163117	0	0.0815585	0.203217	0	0.101609	7.7e-76	2.44e-106	3.85e-76	0.0680365	0.0802443	0.0741404
chr1	35873269	35873752	-	ENSG00000271164	RP4-789D17.4	processed_pseudogene	other	never	0	0	0	0	0	0	0	0	0	0	0	0	0	0	0
chr1	35930717	36072500	+	ENSG00000126070	AGO3	protein_coding	coding	constitutive	5.85704	5.80537	5.8312	5.87322	4.87405	5.37364	4.76795	5.57143	5.16969	5.39357	6.08994	5.74176	5.74492	7.29862	6.52177
chr1	35992108	36013630	-	ENSG00000271554	RP4-665N4.8	antisense	lncRNA	never	0	0	0	0	0	0	0	0	0	0.151049	0.539467	0.345258	0	0	0
chr1	36080065	36084026	-	ENSG00000232862	RP4-665N4.4	transcribed_processed_pseudogene	other	never	0	0.0251998	0.0125999	0.0561089	0.0390928	0.0476009	0.0511699	0.110406	0.0807879	0.385914	0.501084	0.443499	0.272406	0.157018	0.214712
chr1	36084074	36088275	+	ENSG00000092850	TEKT2	protein_coding	coding	stage_specific	0.272072	0.339864	0.305968	1.18927	1.26203	1.22565	3.33942	2.54428	2.94185	29.6382	25.2085	27.4233	6.34652	3.9526	5.14956
chr1	36088874	36093932	+	ENSG00000116863	ADPRHL2	protein_coding	coding	constitutive	12.2183	11.4866	11.8524	10.9731	13.3398	12.1564	11.1488	9.38263	10.2657	18.0053	18.6755	18.3404	14.7111	12.0845	13.3978
chr1	36095235	36125220	-	ENSG00000171812	COL8A2	protein_coding	coding	never	0.656543	1.22567	0.941106	0.292125	0.175325	0.233725	0.0459234	0.0414438	0.0436836	0.10531	0.08766	0.096485	0.0325241	0.0441723	0.0383482
chr1	36136569	36156053	-	ENSG00000054116	TRAPPC3	protein_coding	coding	constitutive	51.0377	45.4397	48.2387	40.0856	65.2181	52.6519	50.053	31.954	41.0035	45.3384	31.9006	38.6195	64.2503	30.3561	47.3032
chr1	36155578	36180849	+	ENSG00000116871	MAP7D1	protein_coding	coding	constitutive	38.0546	34.6502	36.3524	74.2328	78.0714	76.1521	84.9173	61.2758	73.0965	107.227	66.9682	87.0976	117.919	53.5977	85.7583
chr1	36191914	36192170	+	ENSG00000264592	RN7SL131P	misc_RNA	other	never	0	0	0	0	0	0	0	0	0	0	0	0	0	0	0
chr1	36224415	36305357	+	ENSG00000054118	THRAP3	protein_coding	coding	constitutive	98.9315	72.6691	85.8003	58.8329	78.422	68.6274	83.2582	75.031	79.1446	70.6474	53.2081	61.9278	65.3619	60.8422	63.102
chr1	36241897	36242156	-	ENSG00000231849	UBE2V2P4	processed_pseudogene	other	never	0	0	0	0	0	0	0	0	0	0	0.817635	0.408818	0	0	0
chr1	36306386	36324886	+	ENSG00000214193	SH3D21	protein_coding	coding	constitutive	1.81173	5.1868	3.49926	6.59296	4.02366	5.30831	4.42556	2.3463	3.38593	1.74999	2.16749	1.95874	1.80343	2.3067	2.05506
chr1	36323733	36329221	+	ENSG00000116883	RP11-268J15.5	antisense	lncRNA	stage_specific	1.23607	2.9941	2.11509	2.51408	1.47481	1.99445	2.00049	1.0826	1.54154	1.01114	1.40485	1.20799	0.700916	0.860477	0.780697
chr1	36322030	36324154	-	ENSG00000142694	EVA1B	protein_coding	coding	constitutive	7.44399	11.6067	9.52534	19.5887	15.33	17.4594	15.9967	12.5036	14.2501	18.9614	9.16211	14.0618	20.1202	14.9114	17.5158
chr1	36339623	36385896	-	ENSG00000196182	STK40	protein_coding	coding	constitutive	10.8305	10.2578	10.5442	11.2606	14.0164	12.6385	9.60329	8.51079	9.05704	14.9193	12.7383	13.8288	20.9936	13.608	17.3008
chr1	36391237	36397892	-	ENSG00000181817	LSM10	protein_coding	coding	constitutive	47.7992	29.0579	38.4286	18.0627	32.7054	25.384	15.086	13.1619	14.124	27.5856	16.3803	21.9829	26.4221	17.596	22.009
chr1	36402720	36402859	-	ENSG00000222821	RNU4-27P	snRNA	other	never	0	0	0	0	0	0	0	0	0	0	0	0	0	0	0
chr1	36415826	36450451	-	ENSG00000116885	OSCP1	protein_coding	coding	constitutive	2.0168	1.69768	1.85724	6.91703	9.94143	8.42923	7.16835	6.85941	7.01388	30.0008	32.2188	31.1098	15.027	13.8406	14.4338
chr1	36418449	36418578	-	ENSG00000201448	SNORA63	snoRNA	other	never	0	4.02189	2.01094	0	0	0	0	0	0	10.9211	0	5.46055	0	13.7449	6.87245
chr1	36455717	36464437	-	ENSG00000116898	MRPS15	protein_coding	coding	constitutive	79.018	54.0541	66.5361	71.3671	107.517	89.442	52.7907	41.5917	47.1912	55.0194	44.0702	49.5448	40.9513	35.7187	38.335
chr1	36466042	36483278	-	ENSG00000119535	CSF3R	protein_coding	coding	stage_specific	0	0.0014744	0.0007372	0.373136	0.275852	0.324494	1.87098	1.12977	1.50038	14.5126	15.1208	14.8167	1.80938	0.883278	1.34633
chr1	36630334	36630857	+	ENSG00000230214	FTLP18	processed_pseudogene	other	never	0	0	0	0	0	0	0	0	0	0	0	0	0	0	0
chr1	36773139	36775768	+	ENSG00000234481	RP4-614N24.1	antisense	lncRNA	never	0	0	0	0.15951	0.303661	0.231585	0	0	0	0	0	0	0	0	0
chr1	36795526	37034129	-	ENSG00000163873	GRIK3	protein_coding	coding	de_restricted	0.1784	0.138764	0.158582	2.97788	3.26967	3.12378	0.548164	0.399138	0.473651	0.111227	0.148427	0.129827	0.278354	0.232376	0.255365
chr1	37161562	37161634	+	ENSG00000264698	MIR4255	miRNA	other	never	0	0	0	0	0	0	0	0	0	0	0	0	0	0	0
chr1	37203609	37203716	+	ENSG00000207328	RNU6-636P	snRNA	other	never	0	0	0	0	0	0	0	0	0	0	0	0	0	0	0
chr1	37262738	37325100	-	ENSG00000223944	RP5-1180C18.1	lincRNA	lncRNA	never	0	0	0	0	0	0	0	0	0	0	0	0	0	0	0
chr1	37264676	37264786	-	ENSG00000252368	RNA5SP43	rRNA	other	never	0	0	0	0	0	0	0	0	0	0	0	0	0	0	0
chr1	37330851	37330996	+	ENSG00000230451	RPS29P6	processed_pseudogene	other	never	0	0	0	0	0	0	0	0	0	0	0	0	0	0	0
chr1	37454878	37474411	-	ENSG00000233621	LINC01137	antisense	lncRNA	never	0.429275	0.723316	0.576295	0.13535	0.0644173	0.0998837	0.278229	0.361753	0.319991	0.456306	0.361533	0.408919	0.158779	0.199754	0.179266
chr1	37474551	37484379	+	ENSG00000163874	ZC3H12A	protein_coding	coding	constitutive	2.38169	3.75597	3.06883	1.9896	1.8419	1.91575	2.64019	1.98759	2.31389	3.83428	2.94407	3.38917	4.0665	3.2307	3.6486
chr1	37492574	37514774	-	ENSG00000163875	MEAF6	protein_coding	coding	constitutive	28.4733	18.1557	23.3145	28.0202	37.3677	32.694	27.5913	24.1037	25.8475	58.4309	39.9676	49.1992	38.3532	32.2724	35.3128
chr1	37500934	37500994	-	ENSG00000263675	MIR5581	miRNA	other	never	0	0	0	0	0	0	0	0	0	0	0	0	0	0	0
chr1	37534448	37554302	-	ENSG00000163877	SNIP1	protein_coding	coding	constitutive	6.14621	3.9363	5.04125	4.56776	7.17632	5.87204	7.7844	5.75793	6.77116	8.7694	5.26896	7.01918	7.78895	4.10964	5.9493
chr1	37544762	37545294	+	ENSG00000232273	FTH1P1	processed_pseudogene	other	never	0	0	0	0.00781933	0	0.00390966	0.0175348	0	0.0087674	0	0.297047	0.148524	0.00782749	0	0.00391374
chr1	37556246	37556499	+	ENSG00000237749	RP3-423B22.5	processed_pseudogene	other	constitutive	3.27001	3.32959	3.2998	2.99345	2.78891	2.89118	3.19429	3.83859	3.51644	4.51852	2.59207	3.5553	1.29153	2.66174	1.97663
chr1	37556918	37566857	+	ENSG00000163879	DNALI1	protein_coding	coding	constitutive	22.0393	11.3716	16.7054	28.2902	47.5218	37.906	44.3295	30.1941	37.2618	169.02	99.2661	134.143	94.2349	54.9898	74.6124
chr1	37566815	37595935	-	ENSG00000134697	GNL2	protein_coding	coding	constitutive	69.3237	39.6787	54.5012	25.5128	41.1034	33.3081	36.1673	40.5064	38.3368	42.3743	43.9296	43.1519	38.7658	34.8227	36.7942
chr1	37611349	37634923	-	ENSG00000169218	RSPO1	protein_coding	coding	never	0.0281997	0.0639544	0.0460771	0	0	0	0.0124208	0.013463	0.0129419	0.0221497	0.00449959	0.0133246	0.0103961	0.00932951	0.00986281
chr1	37681569	37692249	-	ENSG00000116922	C1orf109	protein_coding	coding	constitutive	17.4526	15.0493	16.2509	9.4934	12.024	10.7587	17.4273	18.845	18.1362	16.459	10.1493	13.3041	17.8252	10.014	13.9196
chr1	37692417	37709719	+	ENSG00000134690	CDCA8	protein_coding	coding	constitutive	26.8633	15.1801	21.0217	7.07711	12.4232	9.75015	21.2814	22.9041	22.0927	9.85952	3.7716	6.81556	24.4275	15.0792	19.7534
chr1	37713879	37765133	-	ENSG00000183317	EPHA10	protein_coding	coding	never	0.18146	0.999932	0.590696	0.019466	0.010112	0.014789	0.0674581	0.175545	0.121502	0.320512	0.372551	0.346531	0.293758	0.196366	0.245062
chr1	37737954	37738054	-	ENSG00000200421	Y_RNA	misc_RNA	other	never	0	0	0	0	0	0	0	0	0	0	0	0	0	0	0
chr1	37776669	37779418	+	ENSG00000214141	ACTN4P2	processed_pseudogene	other	never	0.00944615	0	0.00472308	0	0	0	0	0	0	0	0.0113145	0.00565725	0	0	0
chr1	37782456	37782885	-	ENSG00000227416	RP11-109P14.2	processed_pseudogene	other	never	0	0	0	0	0	0	0	0	0	0	0.131421	0.0657105	0	0	0
chr1	37793801	37801137	+	ENSG00000185090	MANEAL	protein_coding	coding	stage_specific	6.50643	6.87538	6.6909	1.82991	1.30522	1.56757	2.60997	1.9618	2.28588	0.77748	1.22668	1.00208	11.1566	10.4943	10.8255
chr1	37799719	37800879	-	ENSG00000233728	RP11-109P14.9	antisense	lncRNA	never	0.0325222	0.230266	0.131394	0.102542	0.0390424	0.0707922	0.0613203	0.0779567	0.0696385	0.645011	0.1483	0.396655	0.461923	0.383382	0.422652
chr1	37802943	37808185	-	ENSG00000196449	YRDC	protein_coding	coding	constitutive	11.3073	9.00462	10.156	8.09765	12.3231	10.2104	6.61842	5.20279	5.91061	6.02425	5.94705	5.98565	6.57922	5.8808	6.23001
chr1	37806978	37809454	+	ENSG00000197982	C1orf122	protein_coding	coding	constitutive	69.3724	56.3109	62.8417	66.9058	99.4543	83.18	43.337	39.9093	41.6232	95.8398	37.2751	66.5575	76.129	52.8487	64.4888
chr1	37809566	37859620	-	ENSG00000188786	MTF1	protein_coding	coding	constitutive	2.79071	3.52666	3.15869	2.07231	3.29175	2.68203	3.30714	4.30878	3.80796	3.97481	4.61683	4.29582	3.53917	4.70033	4.11975
chr1	37840985	37841676	+	ENSG00000235673	RP11-109P14.8	processed_pseudogene	other	never	0	0	0	0	0	0	0	0	0	0	0.0992166	0.0496083	0.0261446	0.0205572	0.0233509
chr1	37860696	37861580	+	ENSG00000230955	RP11-109P14.10	antisense	lncRNA	never	0.0590048	0.160681	0.109843	0.0372085	0.141669	0.0894387	0	0.141436	0.070718	0.436382	2.53706	1.48672	0.0931182	0.109826	0.101472
chr1	37860696	37947057	-	ENSG00000204084	INPP5B	protein_coding	coding	constitutive	6.58823	7.74295	7.16559	4.42393	4.09526	4.2596	5.17954	5.21336	5.19645	4.41614	4.26393	4.34004	4.72622	4.24789	4.48705
chr1	37884236	37884317	-	ENSG00000252448	SNORA63	snoRNA	other	never	0	0	0	0	0	0	0	0	0	0	0	0	0	0	0
chr1	37885022	37885117	+	ENSG00000222282	RNU6-584P	snRNA	other	never	0	0	0	0	0	0	0	0	0	0	0	0	0	0	0
chr1	37953507	37953780	+	ENSG00000277168	Metazoa_SRP	misc_RNA	other	never	0	0	0	0	0	0	0	0	0	0	0	0	0	0	0
chr1	37956974	37990921	-	ENSG00000183431	SF3A3	protein_coding	coding	constitutive	144.616	103.774	124.195	50.8868	79.5692	65.228	90.3379	95.2152	92.7766	86.1374	57.5394	71.8384	62.1643	58.6426	60.4034
chr1	37991461	37991569	+	ENSG00000212541	RNU6-510P	snRNA	other	never	0	0	0	0	0	0	0	0	0	0	21.3444	10.6722	0	0	0
chr1	37996769	38005606	-	ENSG00000183386	FHL3	protein_coding	coding	constitutive	21.8086	20.7576	21.2831	12.5255	11.1783	11.8519	8.84875	7.22183	8.03529	9.88999	8.9511	9.42055	11.4118	7.93702	9.67441
chr1	38009257	38024824	+	ENSG00000183520	UTP11	protein_coding	coding	constitutive	23.7283	16.2161	19.9722	11.2993	15.9922	13.6457	11.6777	11.7208	11.6992	11.687	9.52708	10.607	10.2796	10.4625	10.3711
chr1	38044610	38046794	-	ENSG00000185668	POU3F1	protein_coding	coding	es_restricted	1.59338	2.34047	1.96693	0.121793	0.0483039	0.0850484	0.0151733	0.00964493	0.0124091	0	0.0385562	0.0192781	0.17145	0.139801	0.155625
chr1	38047313	38119025	+	ENSG00000224592	RP5-884C9.2	lincRNA	lncRNA	never	0.249943	0.830009	0.539976	0.0277193	0	0.0138596	0	0.0263416	0.0131708	0	0	0	0.0346853	0.0775379	0.0561116
chr1	38080571	38080911	-	ENSG00000223589	RP5-884C9.3	processed_pseudogene	other	never	0	0	0	0	0	0	0	0	0	0	0	0	0	0	0
chr1	38089230	38089329	+	ENSG00000265596	MIR3659	miRNA	other	never	0	0	0	0	0	0	0	0	0	0	0	0	0	0	0
chr1	38209033	38214767	-	ENSG00000237290	LINC01343	lincRNA	lncRNA	never	0	0.0125202	0.0062601	0	0	0	0	0	0	0	0	0	0	0	0
chr1	38383837	38384422	-	ENSG00000275350	RP11-329N22.2	processed_pseudogene	other	never	0.0851012	0.162222	0.123662	0.134162	0.0510814	0.0926217	0.0401144	0.0509976	0.045556	0	0	0	0	0	0
chr1	38396658	38396765	+	ENSG00000200796	RNU6-753P	snRNA	other	never	0	0	0	0	0	0	0	0	0	0	0	0	0	0	0
chr1	38474874	38496034	+	ENSG00000238063	RP11-329N22.1	lincRNA	lncRNA	never	0	0	0	0	0	0	0	0	0	0	0	0	0	0.0170351	0.00851755
chr1	38708930	38710890	+	ENSG00000215895	RP11-334L9.1	processed_pseudogene	other	stage_specific	1.17417	0.950184	1.06218	1.84441	1.64572	1.74507	1.37085	1.16063	1.26574	0.704894	1.1409	0.922897	0.629215	1.20823	0.918722
chr1	38838197	38859823	-	ENSG00000116954	RRAGC	protein_coding	coding	constitutive	7.45122	7.02916	7.24019	7.76158	6.89378	7.32768	6.03368	5.79783	5.91575	8.49676	12.2196	10.3582	7.263	8.5713	7.91715
chr1	38839332	38874494	-	ENSG00000273637	RP5-864K19.7	processed_transcript	lncRNA	never	2.89e-07	1.45e-18	1.45e-07	2.29e-44	1.85e-07	9.25e-08	5.86e-21	3.5e-13	1.75171e-13	2.91e-09	0.00993091	0.00496546	7.44e-21	1.82e-19	9.44988e-20
chr1	38862963	38874105	-	ENSG00000214114	MYCBP	protein_coding	coding	constitutive	16.2476	19.8508	18.0492	18.6712	17.1022	17.8867	15.1099	22.0147	18.5623	16.2324	25.7784	21.0054	13.5578	25.8213	19.6896
chr1	38864500	38881617	-	ENSG00000274944	RP5-864K19.6	protein_coding	coding	never	3.73621	0.0682742	1.90224	0.0161369	3.77413	1.89513	0.241601	0.0391566	0.140379	2.1519	0.352466	1.25218	0.000115573	0.191463	0.0957893
chr1	38874450	38881587	-	ENSG00000131233	GJA9	protein_coding	coding	never	0	0.0108903	0.00544515	0	0	0	0	0	0	0.0583348	0.110562	0.0844484	0	0	0
chr1	38885806	38941799	-	ENSG00000158315	RHBDL2	protein_coding	coding	never	0.300202	0.345161	0.322682	0.0619853	0.0386855	0.0503354	0.0308498	0.00292614	0.016888	0.290209	0.419656	0.354932	0	0.0201397	0.0100698
chr1	38859999	38919396	+	ENSG00000228436	RP5-864K19.4	antisense	lncRNA	stage_specific	0.419316	0.429222	0.424269	0.856873	0.621212	0.739043	0.782963	1.04605	0.914506	1.56174	1.28199	1.42186	1.46153	1.07303	1.26728
chr1	38926869	38926977	+	ENSG00000199963	RNU6-605P	snRNA	other	never	0	0	0	0	0	0	0	0	0	0	0	0	0	0	0
chr1	38950824	38950925	-	ENSG00000207466	Y_RNA	misc_RNA	other	never	0	0	0	0	0	0	0	0	0	0	0	0	0	0	0
chr1	38958274	38958925	-	ENSG00000235549	EIF1P2	processed_pseudogene	other	never	0	0	0	0	0	0	0	0	0	0	0	0	0	0	0
chr1	38991222	39006059	+	ENSG00000174574	AKIRIN1	protein_coding	coding	constitutive	117.583	100.72	109.151	53.0026	61.2947	57.1487	42.9095	36.1151	39.5123	48.0998	47.2268	47.6633	38.9827	42.8677	40.9252
chr1	39026317	39034636	+	ENSG00000168653	NDUFS5	protein_coding	coding	constitutive	586.775	293.504	440.139	275.121	508.9	392.01	331.942	288.276	310.109	420.723	236.982	328.853	325.964	235.95	280.957
chr1	39081315	39487177	+	ENSG00000127603	MACF1	protein_coding	coding	constitutive	77.3654	81.8181	79.5918	50.6474	53.3623	52.0048	69.3377	80.7219	75.0298	66.0042	86.2261	76.1151	74.4703	87.4001	80.9352
chr1	39249837	39257649	-	ENSG00000226438	RP11-420K8.1	antisense	lncRNA	never	0	0	0	0	0	0	0	0	0	0	0	0	0	0	0
chr1	39120939	39121043	-	ENSG00000206654	RNU6-608P	snRNA	other	never	0	0	0	0	0	0	0	0	0	0	0	0	0	0	0
chr1	39154163	39154296	-	ENSG00000222378	RNA5SP44	rRNA	other	never	0	0	0	0	0	0	0	0	0	0	10.7686	5.3843	0	0	0
chr1	39206511	39206957	+	ENSG00000270040	RP11-416A14.1	sense_intronic	lncRNA	never	0	0	0	0.0427751	0	0.0213876	0.0639487	0.0406491	0.0522989	0.100318	0.162497	0.131408	0	0.168343	0.0841715
chr1	39304293	39304898	-	ENSG00000217897	HSPE1P8	processed_pseudogene	other	never	0.0973022	0.0529944	0.0751483	0	0	0	0	0.349855	0.174928	0	2.09785	1.04893	0.153557	0.24148	0.197519
chr1	39491645	39525935	+	ENSG00000183682	BMP8A	protein_coding	coding	pp1_restricted	0.176925	0.248199	0.212562	0.179186	0.10298	0.141083	0.79354	0.472287	0.632914	2.05552	2.58879	2.32215	0.514711	0.335965	0.425338
chr1	39522279	39546187	-	ENSG00000182109	RP11-69E11.4	antisense	lncRNA	constitutive	1.98281	3.17867	2.58074	3.59796	2.56188	3.07992	5.44495	3.87982	4.66238	6.63614	4.90342	5.76978	4.29218	3.26358	3.77788
chr1	39531837	39558707	-	ENSG00000243970	PPIEL	unprocessed_pseudogene	other	never	0.0733392	0.539016	0.306178	0.388985	0.277702	0.333344	0.512498	0.439273	0.475886	0.464813	0.352845	0.408829	0.340638	0.27404	0.307339
chr1	39514955	39516490	+	ENSG00000237624	OXCT2P1	unprocessed_pseudogene	other	es_restricted	1.43943	1.09102	1.26523	0.434941	0.547203	0.491072	0.774628	0.355818	0.565223	0.470107	0.747121	0.608614	0.165639	0.122798	0.144218
chr1	39560815	39576790	-	ENSG00000090621	PABPC4	protein_coding	coding	constitutive	121.495	110.777	116.136	57.19	45.6556	51.4228	106.988	97.0491	102.019	80.3469	81.8057	81.0763	96.2051	83.1455	89.6753
chr1	39565159	39573203	+	ENSG00000228060	RP11-69E11.8	antisense	lncRNA	never	0.468189	0.535486	0.501838	0.236192	0.168616	0.202404	0.52966	0.112226	0.320943	0.185714	0.18386	0.184787	0.332492	0.145241	0.238867
chr1	39567373	39567508	-	ENSG00000201457	SNORA55	snoRNA	other	constitutive	10.8688	8.87936	9.87408	10.2808	6.52394	8.40237	10.2466	16.2831	13.2648	8.03703	3.25464	5.64583	8.57631	6.74344	7.65988
chr1	39624152	39639945	-	ENSG00000163909	HEYL	protein_coding	coding	pp2_restricted	0.611949	1.37952	0.995734	0.879145	0.364556	0.62185	0.594263	0.474249	0.534256	0.299405	0.195646	0.247526	1.02384	1.06766	1.04575
chr1	39633415	39633903	+	ENSG00000225903	RP1-144F13.3	antisense	lncRNA	never	0	0	0	0	0	0	0	0	0	0	0.0994215	0.0497107	0	0	0
chr1	39659120	39672038	-	ENSG00000116981	NT5C1A	protein_coding	coding	never	0	0	0	0	0	0	0	0	0	0	0	0	0	0	0
chr1	39678647	39691689	-	ENSG00000116983	HPCAL4	protein_coding	coding	never	0.111704	0.0627395	0.0872218	0.00473793	0.00901968	0.0068788	0.0230351	0.0146423	0.0188387	0.0111116	0.0134997	0.0123056	0.00826223	0.0209781	0.0146202
chr1	39692181	39763914	+	ENSG00000084072	PPIE	protein_coding	coding	constitutive	23.3193	17.3878	20.3535	20.4028	27.6604	24.0316	29.2235	24.3548	26.7891	47.9739	25.3849	36.6794	28.6153	22.3515	25.4834
chr1	39757181	39788861	-	ENSG00000116985	BMP8B	protein_coding	coding	pp1_restricted	0.0912221	0.193107	0.142165	0.0607808	0.0619872	0.061384	0.318035	0.304271	0.311153	4.37561	9.90236	7.13898	0.895913	0.829743	0.862828
chr1	39718027	39718595	+	ENSG00000225333	RP1-144F13.4	processed_pseudogene	other	never	0	0.0242815	0.0121408	0	0	0	0	0	0	0	0	0	0	0	0
chr1	39723565	39723627	-	ENSG00000252413	RNU7-121P	snRNA	other	never	0	0	0	0	0	0	0	0	0	0	0	0	0	0	0
chr1	39769522	39771348	-	ENSG00000198754	OXCT2	protein_coding	coding	es_restricted	1.68135	1.42446	1.5529	0.486727	0.489854	0.488291	0.875967	0.427182	0.651574	0.574382	1.00989	0.792136	0.271548	0.173862	0.222705
chr1	39788975	39790171	+	ENSG00000261798	RP1-118J21.25	antisense	lncRNA	never	0.0322559	0.0614872	0.0468715	0.0203406	0	0.0101703	0.0456137	0.0579889	0.0518013	0.143111	0.212496	0.177804	0.0381784	0.0600384	0.0491084
chr1	39795842	39795996	-	ENSG00000229213	RP1-118J21.24	unprocessed_pseudogene	other	never	0	0	0	0	0	0	0	0	0	0	0	0	0	0	0
chr1	39841021	39883511	-	ENSG00000043514	TRIT1	protein_coding	coding	constitutive	12.6031	10.2702	11.4367	13.7265	15.513	14.6197	19.7869	18.0025	18.8947	17.5082	15.6418	16.575	14.4773	14.6987	14.588
chr1	39881565	39881678	-	ENSG00000202222	Y_RNA	misc_RNA	other	never	0	11.9618	5.9809	0	0	0	0	0	0	0	13.1534	6.5767	0	0	0
chr1	39895425	39902256	-	ENSG00000116990	MYCL	protein_coding	coding	constitutive	4.10731	6.63874	5.37303	18.7936	16.495	17.6443	15.3666	13.9363	14.6515	5.44527	3.82547	4.63537	6.38048	5.59948	5.98998
chr1	39897744	39899098	+	ENSG00000236546	RP1-118J21.5	antisense	lncRNA	never	0.138486	0.15085	0.144668	0.576376	0.665004	0.62069	0.156669	0.165978	0.161324	0.169838	0.165199	0.167518	0.196697	0.189029	0.192863
chr1	39944889	39944998	-	ENSG00000207356	Y_RNA	misc_RNA	other	never	0	0	0	0	0	0	0	0	0	0	0	0	0	0	0
chr1	39955111	39969968	+	ENSG00000168389	MFSD2A	protein_coding	coding	stage_specific	3.26494	3.26996	3.26745	2.0693	3.2292	2.64925	1.45203	0.852242	1.15214	0.407649	0.164112	0.28588	0.604517	0.416012	0.510265
chr1	39962679	39963404	+	ENSG00000228477	RP3-342P20.2	processed_pseudogene	other	constitutive	1.35291	5.21996	3.28643	3.60907	1.48695	2.54801	4.29911	5.89276	5.09593	1.07651	2.17411	1.62531	2.13782	1.10597	1.6219
chr1	40040232	40072649	+	ENSG00000131236	CAP1	protein_coding	coding	constitutive	317.669	127.389	222.529	150.828	337.521	244.174	108.418	71.001	89.7095	206.319	93.4167	149.868	133.278	90.1649	111.721
chr1	40072704	40097703	-	ENSG00000131238	PPT1	protein_coding	coding	constitutive	75.8972	73.7322	74.8147	53.2604	58.8937	56.077	88.2661	117.762	103.014	64.7596	45.6002	55.1799	42.1931	39.8137	41.0034
chr1	40132763	40133448	+	ENSG00000226745	RP11-115D7.3	processed_pseudogene	other	never	0	0	0	0	0	0	0	0	0	0	0	0	0	0	0
chr1	40161372	40240921	+	ENSG00000117000	RLF	protein_coding	coding	constitutive	5.34933	5.90639	5.62786	6.10227	5.03893	5.5706	5.83026	8.0716	6.95093	6.18427	6.54754	6.3659	4.74501	5.93785	5.34143
chr1	40177842	40177949	+	ENSG00000207508	RNU6-1237P	snRNA	other	never	0	0	0	0	0	0	0	0	0	0	0	0	0	0	0
chr1	40245946	40251691	+	ENSG00000188800	TMCO2	protein_coding	coding	never	0	0	0	0	0.0562044	0.0281022	0	0	0	0	0.0706311	0.0353156	0	0.0290477	0.0145238
chr1	40256426	40257967	-	ENSG00000259943	RP1-39G22.7	antisense	lncRNA	constitutive	1.73145	2.26974	2.0006	2.31172	1.57686	1.94429	5.47109	4.80153	5.13631	5.19198	3.94759	4.56979	3.59935	4.14146	3.8704
chr1	40258106	40294184	+	ENSG00000084073	ZMPSTE24	protein_coding	coding	constitutive	17.7193	9.1049	13.4121	8.78243	12.3776	10.58	9.86666	12.1321	10.9994	12.1519	12.866	12.509	10.776	13.661	12.2185
chr1	40262671	40262984	-	ENSG00000231296	RP1-39G22.4	processed_pseudogene	other	never	0	0	0	0	0	0	0	0	0	0.678539	1.1907	0.93462	0	0	0
chr1	40300486	40317816	-	ENSG00000049089	COL9A2	protein_coding	coding	stage_specific	0.983224	2.20506	1.59414	9.68163	7.42223	8.55193	31.915	17.1814	24.5482	3.33976	1.8964	2.61808	16.6645	16.8184	16.7415
chr1	40333077	40333557	-	ENSG00000227311	RP1-228H13.1	processed_pseudogene	other	never	0.177607	0.502939	0.340273	0.239605	0.0994844	0.169545	0.421487	0.822812	0.62215	0.303745	0.680988	0.492366	0.253534	0.335736	0.294635
chr1	40344849	40423326	+	ENSG00000084070	SMAP2	protein_coding	coding	constitutive	2.54953	2.16346	2.35649	3.9249	3.84547	3.88518	4.24394	3.58419	3.91406	5.92148	7.49555	6.70852	13.954	13.6362	13.7951
chr1	40364765	40365183	+	ENSG00000213172	RP1-228H13.2	processed_pseudogene	other	never	0	0	0	0	0	0	0	0	0	0	0	0	0	0	0
chr1	40450101	40463718	+	ENSG00000187801	ZFP69B	protein_coding	coding	constitutive	3.10333	3.29299	3.19816	1.93286	1.58835	1.7606	1.90441	2.50768	2.20605	1.84477	1.77347	1.80912	1.58133	1.89879	1.74006
chr1	40464318	40466767	+	ENSG00000260920	RP1-228H13.5	sense_overlapping	lncRNA	constitutive	2.20625	3.06777	2.63701	1.57468	1.12415	1.34942	1.68535	2.1766	1.93098	1.77306	1.92461	1.84884	1.60095	1.92782	1.76439
chr1	40473054	40474059	+	ENSG00000279667	RP11-656D10.7	TEC	lncRNA	never	0.0400255	0.239793	0.139909	0.126201	0.024025	0.075113	0.0754678	0.131921	0.103694	0.0295971	0.203754	0.116676	0.142124	0.322834	0.232479
chr1	40477214	40496343	+	ENSG00000187815	ZFP69	protein_coding	coding	constitutive	1.72039	1.76894	1.74466	1.75525	1.68272	1.71898	2.05216	1.84599	1.94907	2.4634	2.97561	2.7195	1.52352	1.7577	1.64061
chr1	40493156	40508661	-	ENSG00000238287	RP11-656D10.3	antisense	lncRNA	never	0.161539	0.263941	0.21274	0.203734	0.145444	0.174589	0.190363	0.387215	0.288789	0.238903	0.459538	0.34922	0.127466	0.350788	0.239127
chr1	40508740	40516556	+	ENSG00000164002	EXO5	protein_coding	coding	constitutive	4.10808	2.8477	3.47789	3.21904	5.33946	4.27925	4.15935	3.97863	4.06899	7.61263	4.96131	6.28697	6.06898	5.17908	5.62403
chr1	40514460	40515057	-	ENSG00000227278	RP11-656D10.5	antisense	lncRNA	never	0	0.0785906	0.0392953	0.090995	0.0866144	0.0888047	0.0680186	0	0.0340093	4.38e-05	0.190088	0.0950659	0.0569312	0	0.0284656
chr1	40515753	40517174	-	ENSG00000238186	RP11-656D10.6	antisense	lncRNA	never	0.0475199	0.0517622	0.049641	0	0	0	0	0	0	0.481012	1.2513	0.866156	0	0	0
chr1	40531560	40548169	+	ENSG00000117010	ZNF684	protein_coding	coding	stage_specific	3.76352	3.03626	3.39989	1.47731	2.19056	1.83394	0.996702	1.65947	1.32809	1.51753	1.18762	1.35258	1.8409	1.404	1.62245
chr1	40563533	40563659	+	ENSG00000236505	RP1-63P18.2	unprocessed_pseudogene	other	never	0	0	0	0	0	0	0	0	0	0	0	0	0	0	0
chr1	40593632	40594353	-	ENSG00000233910	GTF2F2P2	processed_pseudogene	other	never	0	0	0	0	0	0	0	0	0	0	0	0	0	0	0
chr1	40620678	40665657	-	ENSG00000117016	RIMS3	protein_coding	coding	constitutive	3.87466	6.44443	5.15954	3.75471	2.94724	3.35098	3.38976	2.95404	3.1719	3.04929	2.34344	2.69637	3.62605	2.45316	3.0396
chr1	40669088	40687588	-	ENSG00000237899	RP4-739H11.3	lincRNA	lncRNA	never	0	0	0	0	0	0	0	0	0	0	0.0367023	0.0183512	0	0	0
chr1	40690379	40692066	-	ENSG00000272145	NFYC-AS1	antisense	lncRNA	stage_specific	0.893001	1.22469	1.05885	1.32979	0.581224	0.955507	2.41405	2.08253	2.24829	2.47274	1.42441	1.94857	1.69794	1.53533	1.61664
chr1	40691647	40771603	+	ENSG00000066136	NFYC	protein_coding	coding	constitutive	35.5885	22.6485	29.1185	25.4558	32.0982	28.777	34.6209	29.0962	31.8586	33.5893	24.8038	29.1965	49.8121	31.8447	40.8284
chr1	40754354	40754446	+	ENSG00000198974	MIR30E	miRNA	other	never	0	0	0	0	0	0	0	0	0	0	0	0	0	0	0
chr1	40757283	40757372	+	ENSG00000207962	MIR30C1	miRNA	other	never	0	0	0	0	0	0	0	0	0	0	0	0	0	0	0
chr1	40784011	40840452	+	ENSG00000117013	KCNQ4	protein_coding	coding	never	0.84167	1.75598	1.29882	0.952185	0.878421	0.915303	0.811445	0.524313	0.667879	0.914787	0.6364	0.775594	0.46464	0.198593	0.331616
chr1	40804845	40805141	+	ENSG00000264582	RN7SL326P	misc_RNA	other	never	0	0	0	0	0	0	0	0	0	0	0.107407	0.0537035	0	0	0
chr1	40861050	40862366	-	ENSG00000179862	CITED4	protein_coding	coding	constitutive	6.48304	8.92513	7.70409	5.07627	4.43499	4.75563	9.3914	5.5045	7.44795	16.2207	14.0628	15.1418	11.3088	7.98223	9.64551
chr1	40863913	40876670	+	ENSG00000229528	RP5-1066H13.4	antisense	lncRNA	never	0	0.0333772	0.0166886	0	0	0	0	0	0	0.0906329	0.0367023	0.0636676	0	0	0
chr1	40938103	40939763	-	ENSG00000228940	RP11-348A7.1	unprocessed_pseudogene	other	never	0	0	0	0	0	0	0	0	0	0	0	0	0	0	0
chr1	40942250	40942515	-	ENSG00000233118	UBE2V1P8	processed_pseudogene	other	never	0	0	0	0	0	0	0	0	0	0	0	0	0	0	0
chr1	40979334	41012565	+	ENSG00000171793	CTPS1	protein_coding	coding	constitutive	59.1959	39.4208	49.3083	19.4035	33.6952	26.5494	32.9602	29.3218	31.141	14.6134	7.54759	11.0805	14.5996	13.4641	14.0319
chr1	41014589	41043890	+	ENSG00000281207	SLFNL1-AS1	antisense	lncRNA	never	0.159107	0.393718	0.276413	0.218115	0.132874	0.175494	0.31956	0.538913	0.429237	0.267357	0.411152	0.339255	0.259282	0.229622	0.244452
chr1	41015596	41023237	-	ENSG00000171790	SLFNL1	protein_coding	coding	never	0.00774486	0.0156696	0.0117072	0.0517816	0.0278928	0.0398372	0.102991	0.149295	0.126143	0.436952	0.46062	0.448786	0.329162	0.492829	0.410996
chr1	41027199	41242154	-	ENSG00000010803	SCMH1	protein_coding	coding	constitutive	12.7274	9.88857	11.308	7.10475	8.1813	7.64302	26.4054	23.3066	24.856	28.9836	23.9287	26.4562	33.2929	20.0483	26.6706
chr1	41098637	41099136	+	ENSG00000215893	RPL23AP17	processed_pseudogene	other	never	0	0.0602406	0.0301203	0	0	0	0.0521371	0.033141	0.042639	0.0817889	0.132483	0.107136	0	0	0
chr1	41242372	41284861	+	ENSG00000235358	RP11-399E6.1	lincRNA	lncRNA	never	0.0386159	0.0210317	0.0298238	0	0.0463578	0.0231789	0.036405	0	0.0182025	0.0571096	0.0314755	0.0442925	0.0414706	0.0239588	0.0327147
chr1	41264549	41264862	-	ENSG00000213987	RP11-399E6.2	processed_pseudogene	other	never	0	0	0	0	0	0	0	0	0	0	0	0	0	0	0
chr1	41361921	41383590	+	ENSG00000204060	FOXO6	protein_coding	coding	stage_specific	1.78585	3.26389	2.52487	0.915577	0.54033	0.727954	0.533826	0.700407	0.617116	1.15952	1.2304	1.19496	1.38053	0.81074	1.09563
chr1	41375003	41375669	-	ENSG00000229901	RP11-399E6.4	antisense	lncRNA	never	0	0.047473	0.0237365	0.0549659	0	0.0274829	0	0	0	0	0.0522022	0.0261011	0.0687791	0.0540801	0.0614296
chr1	41466936	41467028	-	ENSG00000252563	RNA5SP45	rRNA	other	never	0	0	0	0	0	0	0	0	0	0	0	0	0	0	0
chr1	41478774	41484673	-	ENSG00000127129	EDN2	protein_coding	coding	never	0.0154226	0.0294001	0.0224114	0	0	0	0.0971025	0	0.0485512	0.462255	0.205646	0.33395	0.079024	0.0861192	0.0825716
chr1	41506364	42035925	-	ENSG00000127124	HIVEP3	protein_coding	coding	stage_specific	0.378467	0.249935	0.314201	0.159435	0.204826	0.182131	0.0958996	0.0532983	0.0745989	1.18234	1.6101	1.39622	1.02958	1.24518	1.13738
chr1	41535442	41535868	+	ENSG00000230881	RP11-486B10.3	antisense	lncRNA	never	0	0	0	0	0	0	0	0	0	0	0	0	0	0	0
chr1	41542068	41544310	+	ENSG00000230638	RP11-486B10.4	processed_pseudogene	other	never	0	0	0	0	0	0	0	0	0	0.208104	0.234091	0.221098	0.0185056	0.0097005	0.0141031
chr1	42040596	42041729	+	ENSG00000227538	HNRNPFP1	processed_pseudogene	other	never	0	0	0	0	0	0	0	0	0	0	0	0	0	0.0106909	0.00534545
chr1	42140634	42141391	+	ENSG00000228776	RP11-319C21.1	processed_pseudogene	other	never	0	0	0	0	0	0	0	0	0	0	0.0392811	0.0196405	0	0	0
chr1	42153420	42155824	+	ENSG00000044012	GUCA2B	protein_coding	coding	never	0	0	0	0	0	0	0.0388639	0.0494078	0.0441358	0.0609669	0	0.0304834	0.520462	0.25577	0.388116
chr1	42162690	42164718	-	ENSG00000197273	GUCA2A	protein_coding	coding	never	0	0	0	0.0841056	0.0533711	0.0687384	0.628688	0.985746	0.807217	0.131499	0.0266256	0.0790623	0.350806	0.413751	0.382279
chr1	42176538	42335877	-	ENSG00000198815	FOXJ3	protein_coding	coding	constitutive	19.37	18.3976	18.8838	21.9648	18.6406	20.3027	30.642	30.5827	30.6123	42.6187	46.8756	44.7471	23.7845	22.5231	23.1538
chr1	42335385	42338376	-	ENSG00000227527	RP11-223A3.1	sense_overlapping	lncRNA	never	0	0.0577545	0.0288773	0.0222901	0	0.0111451	0	0.0211822	0.0105911	0.940962	0.867942	0.904452	0	0	0
chr1	42380794	42422578	+	ENSG00000177181	RIMKLA	protein_coding	coding	stage_specific	4.12844	4.63757	4.383	1.8574	1.30539	1.5814	0.378459	0.792944	0.585701	3.62236	4.21381	3.91809	1.65138	1.2065	1.42894
chr1	42412397	42412794	-	ENSG00000235002	RP11-157D18.2	processed_pseudogene	other	never	0	0.0467081	0.0233541	0	0	0	0	0	0	0.126832	0.616334	0.371583	0	0	0
chr1	42430328	42456267	-	ENSG00000066185	ZMYND12	protein_coding	coding	never	0.347298	0.589581	0.46844	0.470809	0.269285	0.370047	0.465782	0.281321	0.373551	0.968666	0.753826	0.861246	0.423754	0.444177	0.433966
chr1	42456116	42473385	+	ENSG00000127125	PPCS	protein_coding	coding	constitutive	18.6363	21.421	20.0286	21.9447	23.7498	22.8472	21.4655	19.0027	20.2341	32.6848	26.8682	29.7765	21.2093	23.8248	22.5171
chr1	42463329	42654664	+	ENSG00000186409	CCDC30	protein_coding	coding	stage_specific	0.383419	0.75869	0.571055	1.30995	0.662935	0.986442	1.59065	2.73957	2.16511	11.3186	15.3325	13.3255	5.61165	6.86278	6.23721
chr1	42491738	42492493	+	ENSG00000230116	RP11-163G10.2	processed_pseudogene	other	never	0	0	0	0.0414697	0	0.0207348	0	0.0525448	0.0262724	0.0432252	0.332581	0.187903	0.0691884	0.27201	0.170599
chr1	42500204	42500339	-	ENSG00000236876	TMSB4XP1	processed_pseudogene	other	constitutive	278.514	58.8998	168.707	254.28	641.956	448.118	46.1095	41.0334	43.5714	331.795	131.162	231.478	146.655	77.8868	112.271
chr1	42569032	42569139	+	ENSG00000200254	RNU6-536P	snRNA	other	never	0	0	0	0	0	0	0	0	0	0	47.6944	23.8472	0	0	0
chr1	42570969	42571390	+	ENSG00000236180	RP11-163G10.4	processed_pseudogene	other	never	0.0759437	0	0.0379719	0.143671	0.0911694	0.11742	0	0.18204	0.09102	0.561571	1.31898	0.940276	0.179776	0.471184	0.32548
chr1	42658424	42676758	+	ENSG00000171960	PPIH	protein_coding	coding	constitutive	53.4975	25.7605	39.629	17.0427	32.94	24.9914	29.8004	27.1658	28.4831	30.4385	12.424	21.4312	22.7521	19.4653	21.1087
chr1	42678734	42681659	+	ENSG00000234917	RP5-994D16.3	lincRNA	lncRNA	never	0.326401	0.0222213	0.174311	0.102915	0.2449	0.173907	0.115393	0.268948	0.19217	0.482719	0.684179	0.583449	0.354138	0.531594	0.442866
chr1	42682426	42702349	+	ENSG00000065978	YBX1	protein_coding	coding	constitutive	715.194	513.75	614.472	389.216	527.726	458.471	450.163	404.226	427.195	388.104	245.339	316.721	395.824	333.942	364.883
chr1	42733092	42740254	-	ENSG00000164007	CLDN19	protein_coding	coding	constitutive	2.45127	4.94934	3.70031	8.14651	4.90923	6.52787	12.1841	10.9507	11.5674	2.62567	1.6292	2.12744	2.70215	1.88278	2.29246
chr1	42746334	42767084	-	ENSG00000117385	P3H1	protein_coding	coding	constitutive	30.1128	35.9071	33.01	20.2541	24.2922	22.2732	22.3881	17.1242	19.7562	34.628	29.1741	31.9011	38.1692	30.7608	34.465
chr1	42767268	42775747	+	ENSG00000164008	C1orf50	protein_coding	coding	constitutive	10.1265	8.75895	9.44272	8.72905	9.99945	9.36425	9.38399	8.15605	8.77002	14.8334	11.95	13.3917	13.0048	12.6245	12.8147
chr1	42767291	42794493	+	ENSG00000283580	RP5-994D16.12	protein_coding	coding	never	1.4455	0.578826	1.01216	0.601603	0.529129	0.565366	0.626136	0.938882	0.782509	0.678805	0.942627	0.810716	1.41666	0.892577	1.15462
chr1	42785006	42816619	+	ENSG00000274386	RP5-994D16.11	protein_coding	coding	never	0.0457406	0.250355	0.148048	0.163219	0.126587	0.144903	0.217979	0.215964	0.216972	0.365392	0.391798	0.378595	0.210334	0.112913	0.161624
chr1	42817123	42844989	+	ENSG00000164010	ERMAP	protein_coding	coding	stage_specific	1.26357	1.49583	1.3797	1.29265	0.93149	1.11207	1.76417	1.64345	1.70381	2.43555	2.61391	2.52473	2.57943	2.5052	2.54231
chr1	42807051	42817252	-	ENSG00000177868	SVBP	protein_coding	coding	constitutive	21.0507	17.6196	19.3351	21.6135	27.4746	24.544	29.9311	31.1621	30.5466	59.9159	64.9644	62.4402	43.6375	53.1287	48.3831
chr1	42834680	42846422	-	ENSG00000228192	RP11-342M1.3	antisense	lncRNA	es_restricted	1.77081	1.13629	1.45355	0.642676	0.709938	0.676307	1.15635	0.688906	0.922628	1.5325	0.916395	1.22445	1.03219	0.680984	0.856587
chr1	42775812	42776790	-	ENSG00000228452	RP5-994D16.9	antisense	lncRNA	pp1_restricted	0	0.0635634	0.0317817	0	0	0	0	0.034969	0.0174845	1.5534	2.41139	1.98239	0	0.036205	0.0181025
chr1	42846572	42852477	+	ENSG00000164011	ZNF691	protein_coding	coding	constitutive	17.2979	12.8956	15.0968	7.73909	7.12166	7.43037	8.18927	8.70607	8.44767	10.9901	7.34996	9.17003	10.0294	7.86133	8.94537
chr1	42886596	42888767	-	ENSG00000233708	RP11-342M1.7	processed_pseudogene	other	never	0	0.00493893	0.00246947	0.00285924	0	0.00142962	0	0	0	0.0670561	0.0217238	0.0443899	0	0	0
chr1	42891093	42892430	-	ENSG00000237090	RP11-342M1.6	processed_pseudogene	other	never	0	0.0155176	0.0077588	0.0119779	0	0.00598895	0	0	0	0	0.0113756	0.0056878	0	0	0
chr1	42903231	42903912	+	ENSG00000225099	ATP6V1E1P1	processed_pseudogene	other	never	0.0676797	0.138228	0.102954	0.149376	0.142185	0.145781	0.0584877	0.16223	0.110359	0.0750693	0.121599	0.0983341	0.106808	0.0524888	0.0796484
chr1	42925374	42959173	-	ENSG00000117394	SLC2A1	protein_coding	coding	constitutive	258.307	250.282	254.294	79.7939	74.4542	77.124	100.315	65.219	82.767	79.0275	75.4004	77.2139	75.5413	45.305	60.4231
chr1	42959048	42983358	+	ENSG00000227533	SLC2A1-AS1	lincRNA	lncRNA	never	0.999766	1.52425	1.26201	0.470053	0.201351	0.335702	0.461926	0.341332	0.401629	0.326634	0.294588	0.310611	0.168071	0.328131	0.248101
chr1	42991437	42991544	+	ENSG00000207256	RNU6-880P	snRNA	other	never	0	0	0	0	0	0	0	0	0	0	0	0	0	0	0
chr1	43023548	43023637	-	ENSG00000283136	U6	snRNA	other	never	0	0	0	0	0	0	0	0	0	0	0	0	0	0	0
chr1	43104085	43104497	+	ENSG00000277513	RP3-393B19.1	processed_pseudogene	other	never	0	0.129658	0.064829	0.100082	0	0.050041	0	0	0	0	0	0	0	0	0
chr1	43145152	43156396	+	ENSG00000186973	FAM183A	protein_coding	coding	stage_specific	0.599823	0.730955	0.665389	0.351045	0.330803	0.340924	0.596257	0.56278	0.579519	6.17987	6.96456	6.57221	1.62803	1.07514	1.35159
chr1	43164174	43270936	-	ENSG00000117395	EBNA1BP2	protein_coding	coding	constitutive	67.568	47.8024	57.6852	23.402	37.8756	30.6388	31.1684	25.7758	28.4721	41.4098	33.3101	37.3599	39.3477	32.1971	35.7724
chr1	43172148	43254358	+	ENSG00000243710	CFAP57	protein_coding	coding	stage_specific	0.256247	0.324701	0.290474	0.19831	0.11363	0.15597	0.510687	0.417114	0.4639	4.09454	4.20819	4.15137	1.05684	1.0416	1.04922
chr1	43196416	43196536	+	ENSG00000199240	RNA5SP46	rRNA	other	never	0	0	0	0	0	0	0	0	0	0	0	0	10.0957	0	5.04785
chr1	43269993	43274002	+	ENSG00000179178	TMEM125	protein_coding	coding	constitutive	60.4741	64.9855	62.7298	16.4238	11.3662	13.895	67.4199	50.6482	59.0341	100.456	78.3032	89.3796	60.7642	51.3922	56.0782
chr1	43281882	43285617	-	ENSG00000253313	C1orf210	protein_coding	coding	constitutive	5.35887	7.79408	6.57648	3.94692	3.3435	3.64521	14.2285	14.4723	14.3504	22.9685	21.4581	22.2133	26.3799	22.3795	24.3797
chr1	43300992	43323108	+	ENSG00000066056	TIE1	protein_coding	coding	never	0.985694	1.39017	1.18793	0.105115	0.143584	0.12435	0.148539	0.253758	0.201149	0.870021	0.379925	0.624973	0.895808	0.426581	0.661195
chr1	43337806	43352772	+	ENSG00000117400	MPL	protein_coding	coding	never	0.0472365	0.0803509	0.0637937	0.0643147	0.0567067	0.0605107	0.00977134	0.00547177	0.00762156	0.0270077	0.0722167	0.0496122	0.0824986	0.0396561	0.0610774
chr1	43354683	43358658	-	ENSG00000234694	RP1-92O14.3	antisense	lncRNA	never	0.706947	1.00108	0.854013	0.378931	0.381906	0.380418	0.333236	0.148275	0.240756	0.0522757	0.232862	0.142569	0.139458	0.219309	0.179384
chr1	43358954	43363203	+	ENSG00000117399	CDC20	protein_coding	coding	constitutive	163.25	79.7481	121.499	44.4018	87.1906	65.7962	78.2025	69.5598	73.8812	48.6054	17.815	33.2102	92.9945	55.2115	74.103
chr1	43363396	43368074	-	ENSG00000066322	ELOVL1	protein_coding	coding	constitutive	28.0139	22.2329	25.1234	15.2692	27.4594	21.3643	22.4643	20.673	21.5687	23.8964	18.9453	21.4209	42.407	29.1554	35.7812
chr1	43383916	43389808	-	ENSG00000159479	MED8	protein_coding	coding	constitutive	12.7273	9.79002	11.2587	8.56971	12.2494	10.4096	10.2002	9.13176	9.66598	17.0604	12.495	14.7777	17.1873	15.815	16.5011
chr1	43385112	43389155	+	ENSG00000229431	RP1-92O14.6	antisense	lncRNA	never	0	0	0	0.0578502	0.0367101	0.0472801	0.0288286	0.0366499	0.0327392	0.456451	0.503179	0.479815	0.0241294	0.0189726	0.021551
chr1	43389881	43452650	+	ENSG00000198198	SZT2	protein_coding	coding	constitutive	2.81528	2.95927	2.88727	3.7294	4.15563	3.94252	5.8599	4.524	5.19195	6.60376	7.11089	6.85733	7.18513	6.30628	6.74571
chr1	43448538	43448611	+	ENSG00000274975	MIR6735	miRNA	other	never	0	0	0	0	0	0	0	0	0	0	0	0	0	0	0
chr1	43453926	43456995	+	ENSG00000229348	HYI-AS1	antisense	lncRNA	never	0.0476626	0.129794	0.0887283	0.15028	0.228873	0.189577	0.314536	0	0.157268	0.281956	0.313993	0.297974	0.376093	0.295717	0.335905
chr1	43447775	43448644	-	ENSG00000229372	SZT2-AS1	antisense	lncRNA	never	0.0977668	0.248488	0.173127	0.34936	0.15649	0.252925	0.337954	0.195292	0.266623	0.436926	0.300361	0.368644	0.205721	0.34373	0.274726
chr1	43451002	43453989	-	ENSG00000178922	HYI	protein_coding	coding	constitutive	12.9947	11.2351	12.1149	14.2597	16.2295	15.2446	12.3768	10.0863	11.2316	31.6794	25.0376	28.3585	30.5488	25.1531	27.851
chr1	43525186	43623666	+	ENSG00000142949	PTPRF	protein_coding	coding	constitutive	64.6253	72.5134	68.5694	87.2803	88.333	87.8067	129.249	101.503	115.376	164.751	131.199	147.975	161.464	89.1783	125.321
chr1	43650157	43705515	+	ENSG00000066135	KDM4A	protein_coding	coding	constitutive	34.1129	32.3295	33.2212	15.3055	20.2482	17.7768	14.7242	14.2218	14.473	22.7674	17.8989	20.3331	20.1517	17.9127	19.0322
chr1	43699764	43708138	-	ENSG00000236200	KDM4A-AS1	antisense	lncRNA	constitutive	2.74633	3.42406	3.0852	3.41698	2.38653	2.90176	2.34226	2.48654	2.4144	8.56984	8.70751	8.63867	1.77159	1.78005	1.77582
chr1	43705823	43931165	+	ENSG00000126091	ST3GAL3	protein_coding	coding	constitutive	3.22382	3.60481	3.41432	4.53284	5.13133	4.83209	1.646	2.12825	1.88712	3.58353	3.25455	3.41904	3.74407	3.65945	3.70176
chr1	43709391	43727343	-	ENSG00000229444	RP11-184I16.4	antisense	lncRNA	never	0	0	0	0.0389462	0.148285	0.0936156	0	0	0	0	0.110964	0.055482	0	0	0
chr1	43716466	43716556	-	ENSG00000283414	U6	snRNA	other	never	0	0	0	0	0	0	0	0	0	0	0	0	0	0	0
chr1	43743470	43743741	+	ENSG00000233674	RP11-184I16.3	processed_pseudogene	other	never	0	0	0	0.593463	0	0.296731	0.221806	0.140992	0.181399	0	0.98634	0.49317	0.185651	0.583899	0.384775
chr1	43838621	43838683	+	ENSG00000283477	MIR6079	miRNA	other	never	0	0	0	0	0	0	0	0	0	0	0	0	0	0	0
chr1	43850299	43851611	-	ENSG00000224751	SHMT1P1	processed_pseudogene	other	never	0	0	0	0.00909774	0	0.00454887	0.00680054	0.00864556	0.00772305	0.0426728	0.0691224	0.0558976	0	0	0
chr1	43933319	43937241	+	ENSG00000117407	ARTN	protein_coding	coding	stage_specific	6.55081	10.6614	8.6061	2.29201	2.21988	2.25595	0.461121	0.391698	0.426409	0.780048	0.203261	0.491654	0.398048	0.271264	0.334656
chr1	43944369	43946551	-	ENSG00000237950	RP11-7O11.3	antisense	lncRNA	never	0.0579062	0.0921008	0.0750035	0	0.0695415	0.0347708	0.163813	0.0347008	0.0992569	0.0856382	0.208156	0.146897	0.311211	0.359393	0.335302
chr1	43946938	43968022	+	ENSG00000117408	IPO13	protein_coding	coding	constitutive	16.9371	12.3888	14.663	9.01967	12.0505	10.5351	8.83047	8.35319	8.59183	18.552	14.0803	16.3162	20.7153	13.6977	17.2065
chr1	43969999	43973369	+	ENSG00000132768	DPH2	protein_coding	coding	constitutive	34.0097	26.5359	30.2728	8.39924	13.827	11.1131	13.8271	9.58976	11.7084	11.2632	7.63059	9.44689	13.547	9.10048	11.3237
chr1	43974486	43978295	+	ENSG00000117410	ATP6V0B	protein_coding	coding	constitutive	59.4612	40.5455	50.0033	45.9316	63.8043	54.868	46.23	37.3259	41.7779	77.9206	66.7081	72.3144	84.665	78.8043	81.7347
chr1	43978942	43991170	+	ENSG00000117411	B4GALT2	protein_coding	coding	constitutive	48.5586	39.2005	43.8796	38.6773	52.8988	45.788	44.9733	40.7172	42.8453	34.4048	19.3725	26.8886	43.7252	23.7751	33.7501
chr1	43991358	43996528	+	ENSG00000159214	CCDC24	protein_coding	coding	constitutive	10.6709	12.1181	11.3945	12.6613	13.0696	12.8654	10.4809	7.32258	8.90174	21.082	14.4333	17.7577	12.4207	9.5469	10.9838
chr1	43991499	44031467	-	ENSG00000196517	SLC6A9	protein_coding	coding	constitutive	7.16614	5.69889	6.43252	6.17272	8.50108	7.3369	5.36271	4.1226	4.74266	3.0167	3.23317	3.12493	7.19748	3.83642	5.51695
chr1	44030442	44115913	+	ENSG00000230615	RP5-1198O20.4	lincRNA	lncRNA	stage_specific	0.594387	4.61535	2.60487	2.90803	1.48201	2.19502	0.98111	1.14886	1.06499	1.7388	3.20322	2.47101	4.76488	1.15776	2.96132
chr1	44103305	44104703	-	ENSG00000271647	KRT8P47	processed_pseudogene	other	never	0.0044603	0.0054658	0.00496305	0.0105475	0.00803179	0.00928964	0.0168197	0.0294016	0.0231106	0.0461745	0.0327228	0.0394487	0.035547	0.012453	0.024
chr1	44087957	44088477	-	ENSG00000227163	RP5-1198O20.5	processed_pseudogene	other	never	0	0	0	0	0	0	0	0	0	0	0	0	0	0	0
chr1	44117097	44117397	-	ENSG00000239560	RN7SL479P	misc_RNA	other	never	0	0	0	0	0	0	0	0	0	0	0	0	0	0	0
chr1	44118849	44135140	+	ENSG00000171872	KLF17	protein_coding	coding	never	0.00543656	0.0177597	0.0115981	0	0	0	0	0.0032579	0.00162895	0	0	0	0	0	0
chr1	44122152	44122512	-	ENSG00000233514	RP11-570P14.1	processed_pseudogene	other	stage_specific	1.97675	2.5218	2.24927	0.774877	1.73169	1.25328	2.06504	3.0415	2.55327	0.79012	1.82379	1.30696	1.81274	1.51373	1.66324
chr1	44137820	44141631	-	ENSG00000283039	KLF18	protein_coding	coding	never	0.0592339	0.0733205	0.0662772	0	0	0	0	0	0	0	0	0	0	0	0
chr1	44150593	44151753	-	ENSG00000226804	RP4-675G8.3	processed_pseudogene	other	never	0	0	0	0	0	0	0	0	0	0	0	0	0	0	0
chr1	44153384	44153480	-	ENSG00000200171	Y_RNA	misc_RNA	other	never	0	0	0	0	0	0	0	0	0	0	0	0	0	0	0
chr1	44155027	44155301	-	ENSG00000238037	OOSP1P1	processed_pseudogene	other	never	0	0	0	0	0	0	0	0	0	0	0	0	0	0	0
chr1	44172505	44172719	-	ENSG00000227994	RP5-891H21.1	processed_pseudogene	other	never	0	0	0	0	0	0	0	0	0	0	0	0	0	0	0
chr1	44187942	44189049	-	ENSG00000271329	RP5-891H21.5	processed_pseudogene	other	never	0	0	0	0	0	0	0.0256196	0.0162852	0.0209524	0	0.0813763	0.0406881	0	0.0505822	0.0252911
chr1	44213454	44220681	+	ENSG00000178028	DMAP1	protein_coding	coding	constitutive	37.5201	27.1473	32.3337	23.6231	33.6221	28.6226	33.0303	20.5706	26.8005	41.8824	26.7732	34.3278	40.7793	27.3061	34.0427
chr1	44221069	44355260	-	ENSG00000117419	ERI3	protein_coding	coding	constitutive	39.6859	35.6231	37.6545	27.8101	35.1021	31.4561	45.0441	37.8798	41.462	56.7772	52.8701	54.8237	82.4195	72.5694	77.4945
chr1	44243407	44244273	-	ENSG00000233602	ERI3-IT1	sense_intronic	lncRNA	stage_specific	0.506942	0.849536	0.678239	0.737718	0.140441	0.43908	0.661731	1.07495	0.86834	1.26876	2.28871	1.77873	2.33854	2.1049	2.22172
chr1	44390721	44390823	+	ENSG00000199385	RNU6-369P	snRNA	other	never	0	0	0	0	0	0	0	0	0	0	0	0	0	0	0
chr1	44405193	44651724	+	ENSG00000187147	RNF220	protein_coding	coding	constitutive	83.3946	57.1131	70.2538	53.2795	70.0645	61.672	71.8204	56.7119	64.2661	73.4401	39.5121	56.4761	65.0503	37.674	51.3621
chr1	44635237	44674555	-	ENSG00000126106	TMEM53	protein_coding	coding	constitutive	10.1361	10.9897	10.5629	10.5256	16.2934	13.4095	8.14885	7.34889	7.74887	15.8129	11.5665	13.6897	12.6371	9.08776	10.8624
chr1	44545492	44545552	+	ENSG00000263381	MIR5584	miRNA	other	never	0	0	0	0	0	0	0	0	0	0	0	0	0	0	0
chr1	44674691	44725591	+	ENSG00000198520	C1orf228	protein_coding	coding	stage_specific	0.402484	1.09387	0.748177	1.1023	0.513733	0.808017	1.36095	0.829813	1.09538	5.76633	5.59159	5.67896	2.32407	3.8421	3.08309
chr1	44721785	44721902	-	ENSG00000199377	RNU5F-1	snRNA	other	never	0	0	0	0	0	0	0	0	0	0	19.0238	9.5119	0	0	0
chr1	44731054	44731170	-	ENSG00000200169	RNU5D-1	snRNA	other	never	17.1507	0	8.57535	0	0	0	0	0	0	0	0	0	0	0	0
chr1	44739817	44767767	+	ENSG00000142945	KIF2C	protein_coding	coding	constitutive	35.5161	21.6575	28.5868	8.6756	17.8236	13.2496	23.6176	26.9675	25.2925	12.6158	3.70492	8.16036	23.6244	14.3557	18.9901
chr1	44775250	44778779	+	ENSG00000142937	RPS8	protein_coding	coding	constitutive	1510.77	1234.08	1372.42	1368.74	1657.92	1513.33	1520.99	1670.1	1595.55	1650.22	770.42	1210.32	764.941	585.562	675.251
chr1	44775863	44775943	+	ENSG00000264294	SNORD55	snoRNA	other	never	0	0	0	0	0	0	0	0	0	0	0	0	0	0	0
chr1	44777842	44777912	+	ENSG00000202031	SNORD38A	snoRNA	other	never	0	0	0	0	0	0	0	0	0	0	0	0	0	0	0
chr1	44778389	44778456	+	ENSG00000207421	SNORD38B	snoRNA	other	never	0	0	0	0	0	0	0	0	0	0	0	0	0	0	0
chr1	44778389	44778458	+	ENSG00000281859	SNORD38B	snoRNA	other	never	0	0	0	0	0	0	0	0	0	0	0	0	0	0	0
chr1	44759036	44775810	-	ENSG00000225721	RP11-269F19.2	antisense	lncRNA	never	0.145349	0.203058	0.174204	0.0671736	0.191819	0.129496	0.299491	0.0957524	0.197622	1.34236	0.73734	1.03985	0.126082	0.0802763	0.103179
chr1	44776489	44776593	+	ENSG00000200913	SNORD46	snoRNA	other	never	0	0	0	0	0	0	0	34.5736	17.2868	0	34.5526	17.2763	0	0	0
chr1	44780330	44780715	-	ENSG00000234093	RPS15AP11	processed_pseudogene	other	gt_restricted	0.992975	1.42275	1.20786	0.939256	0.706062	0.822659	2.39792	2.40308	2.4005	0.858522	1.8481	1.35331	1.01256	0.72034	0.86645
chr1	44783584	44787705	-	ENSG00000142959	BEST4	protein_coding	coding	pp1_restricted	0.492949	0.555797	0.524373	0.556265	0.591778	0.574021	0.962063	0.606355	0.784209	1.07436	1.48648	1.28042	0.648288	0.450718	0.549503
chr1	44800224	44805990	+	ENSG00000173846	PLK3	protein_coding	coding	constitutive	3.24521	2.8528	3.04901	2.49287	2.64406	2.56847	2.37296	1.43496	1.90396	3.21494	4.6306	3.92277	6.28062	4.2027	5.24166
chr1	44805912	44806675	-	ENSG00000188396	TCTEX1D4	protein_coding	coding	never	0	0.0156873	0.00784365	0	0	0	0	0.0172606	0.0086303	0.937146	0.966005	0.951576	0.227279	0.053612	0.140446
chr1	44808481	44815585	+	ENSG00000222009	BTBD19	protein_coding	coding	stage_specific	0.235957	0.570423	0.40319	0.427147	0.386482	0.406815	1.07477	0.722508	0.898639	3.01838	3.24362	3.131	2.73655	1.99876	2.36766
chr1	44819843	44843063	-	ENSG00000117425	PTCH2	protein_coding	coding	never	0.185859	0.214119	0.199989	0.394002	0.365074	0.379538	0.432454	0.289093	0.360774	0.666706	0.918701	0.792704	0.683358	0.515547	0.599453
chr1	44819882	44819997	-	ENSG00000202444	RNU5E-6P	snRNA	other	never	0	0	0	0	0	0	0	0	0	0	0	0	0	0	0
chr1	44843920	44844082	-	ENSG00000226499	RP5-882O7.1	processed_pseudogene	other	constitutive	40.297	39.714	40.0055	46.9331	19.5807	33.2569	65.8038	62.2599	64.0319	24.1221	44.0534	34.0877	36.3397	18.4537	27.3967
chr1	44850521	44986722	-	ENSG00000070785	EIF2B3	protein_coding	coding	constitutive	21.1056	16.9823	19.0439	10.3631	13.6029	11.983	8.6471	9.79159	9.21935	9.88787	8.85774	9.3728	9.52984	8.56026	9.04505
chr1	44958556	44959395	+	ENSG00000229815	CCNB1IP1P1	processed_pseudogene	other	never	0	0	0	0.0159616	0	0.0079808	0	0	0	0	0.0698326	0.0349163	0.0199728	0	0.0099864
chr1	44932322	44932431	+	ENSG00000253039	RNA5SP47	rRNA	other	never	0	0	0	0	0	0	0	0	0	0	0	0	0	0	0
chr1	44988233	44988725	-	ENSG00000232369	RP5-882O7.4	processed_pseudogene	other	never	0.00809804	0.00955607	0.00882706	0	0	0	0.0362634	0.0436754	0.0399694	0.167668	0.189145	0.178406	0.0239623	0.0159104	0.0199363
chr1	44988704	44991834	-	ENSG00000268949	MRPS17P1	processed_pseudogene	other	never	0.00543842	0.00296197	0.0042002	0.00685894	0	0.00342947	0.00512705	0.00271585	0.00392145	0	0.032896	0.016448	0.00253578	0	0.00126789
chr1	45002539	45011329	-	ENSG00000126107	HECTD3	protein_coding	coding	constitutive	19.9298	20.577	20.2534	22.0657	23.1531	22.6094	15.8776	13.4392	14.6584	17.8419	18.811	18.3265	15.4286	13.52	14.4743
chr1	45012146	45015575	+	ENSG00000126088	UROD	protein_coding	coding	constitutive	79.1904	42.8448	61.0176	54.1666	116.878	85.5223	31.8933	27.4535	29.6734	51.1241	26.9295	39.0268	37.7395	23.7295	30.7345
chr1	45016398	45306209	-	ENSG00000162415	ZSWIM5	protein_coding	coding	constitutive	1.51418	1.43986	1.47702	8.83206	10.4546	9.64333	2.15309	1.73201	1.94255	3.53379	3.39043	3.46211	4.36157	3.56142	3.9615
chr1	45303909	45305619	+	ENSG00000281912	LINC01144	lincRNA	lncRNA	never	0.296628	0.392347	0.344488	0.40751	0.178049	0.29278	0.858909	0.488831	0.67387	0.559455	0.347726	0.453591	0.401248	0.30235	0.351799
chr1	45069976	45070429	-	ENSG00000234315	OSTCP5	processed_pseudogene	other	never	0	0.0358707	0.0179353	0.159208	0.316264	0.237736	0.155227	0.118404	0.136816	0.0974037	0.0788883	0.088146	0.0519697	0.143021	0.0974953
chr1	45326904	45328533	+	ENSG00000186603	HPDL	protein_coding	coding	stage_specific	5.90211	4.51373	5.20792	2.62014	3.50909	3.06461	2.43895	1.25503	1.84699	1.93787	1.44877	1.69332	0.592092	0.250149	0.421121
chr1	45329162	45340470	-	ENSG00000132781	MUTYH	protein_coding	coding	constitutive	38.7438	32.118	35.4309	26.0552	25.2828	25.669	29.014	23.6275	26.3208	38.3437	26.742	32.5429	23.0274	16.2816	19.6545
chr1	45343882	45491166	-	ENSG00000070759	TESK2	protein_coding	coding	constitutive	2.75668	3.89801	3.32735	5.2071	3.89694	4.55202	5.43451	5.57516	5.50483	5.73461	5.49259	5.6136	3.14259	3.15953	3.15106
chr1	45339669	45343975	+	ENSG00000132773	TOE1	protein_coding	coding	constitutive	11.0778	5.42351	8.25066	4.22191	8.75878	6.49034	6.45332	3.70621	5.07977	6.3721	3.89127	5.13169	7.0415	4.13549	5.58849
chr1	45415019	45415344	+	ENSG00000236872	RP11-291L19.1	processed_pseudogene	other	never	0	0.00835778	0.00417889	0	0	0	0	0.0405608	0.0202804	0.204253	0.508096	0.356175	0.0108979	0.00952099	0.0102094
chr1	45493865	45500079	-	ENSG00000280670	CCDC163	protein_coding	coding	constitutive	1.64437	2.40889	2.02663	2.35438	1.88546	2.11992	4.31425	4.03806	4.17615	4.07517	3.72265	3.89891	3.16194	2.69899	2.93046
chr1	45511035	45523047	-	ENSG00000117450	PRDX1	protein_coding	coding	constitutive	649.274	498.566	573.92	500.596	662.648	581.622	243.565	219.09	231.327	269.237	269.426	269.332	141.824	176.462	159.143
chr1	45500052	45513382	+	ENSG00000132763	MMACHC	protein_coding	coding	constitutive	8.65283	5.15586	6.90435	3.11463	5.6438	4.37922	6.89261	6.14864	6.52062	5.13955	4.53238	4.83596	5.02146	5.09449	5.05797
chr1	45530926	45532139	+	ENSG00000234379	HMGB1P48	unprocessed_pseudogene	other	never	0	0	0	0	0	0	0	0	0	0	0	0	0	0	0
chr1	45550542	45570049	+	ENSG00000117448	AKR1A1	protein_coding	coding	constitutive	150.749	127.09	138.919	89.7101	123.241	106.476	148.545	110.189	129.367	143.68	89.2278	116.454	90.847	73.2516	82.0493
chr1	45580891	45580996	-	ENSG00000281133	AL355480.3	pseudogene	other	never	0	0	0	0	0	0	101.132	0	50.566	0	0	0	0	0	0
chr1	45581218	45581321	-	ENSG00000280836	AL355480.1	pseudogene	other	never	0	0	0	0	0	0	0	39.7337	19.8668	0	0	0	0	82.2761	41.138
chr1	45583845	45618904	+	ENSG00000132780	NASP	protein_coding	coding	constitutive	397.768	280.153	338.961	125.71	186.414	156.062	342.45	297.848	320.149	189.821	123.646	156.733	220.082	165.52	192.801
chr1	45592721	45592814	-	ENSG00000281112	AL355480.2	pseudogene	other	never	0	0	0	0	0	0	0	0	0	0	0	0	0	0	0
chr1	45605656	45605730	-	ENSG00000281825	AL355480.4	pseudogene	other	never	0	0	0	0	0	0	0	0	0	0	0	0	0	0	0
chr1	45620043	45624057	-	ENSG00000159588	CCDC17	protein_coding	coding	pp1_restricted	0.591338	0.888359	0.739849	1.08477	0.75905	0.92191	0.460673	0.894107	0.67739	2.10628	1.21613	1.66121	0.867447	0.919414	0.893431
chr1	45627303	45688113	-	ENSG00000159592	GPBP1L1	protein_coding	coding	constitutive	35.0295	37.6626	36.346	39.9486	32.504	36.2263	44.1681	52.0387	48.1034	50.9355	56.8025	53.869	40.7305	39.4385	40.0845
chr1	45694323	45750650	-	ENSG00000197429	IPP	protein_coding	coding	constitutive	1.88996	2.38053	2.13524	4.73504	3.71228	4.22366	3.88394	4.96083	4.42239	4.46781	6.13247	5.30014	4.0108	6.07143	5.04111
chr1	45694683	45697075	-	ENSG00000230896	RP11-767N6.7	sense_intronic	lncRNA	stage_specific	0.287821	0.559851	0.423836	1.73722	1.03658	1.3869	0.96908	0.985596	0.977338	1.39861	2.06849	1.73355	1.97912	2.01535	1.99724
chr1	45687213	45694443	+	ENSG00000159596	TMEM69	protein_coding	coding	constitutive	36.4644	30.3396	33.402	21.0624	25.8311	23.4468	25.2514	29.4014	27.3264	27.6927	17.8728	22.7828	18.4992	17.3936	17.9464
chr1	45645815	45646197	-	ENSG00000225447	RPS15AP10	processed_pseudogene	other	constitutive	1.11911	2.43803	1.77857	2.5876	1.11956	1.85358	3.78054	6.14748	4.96401	5.24103	13.1253	9.18317	4.63605	7.98488	6.31046
chr1	45651038	45651826	-	ENSG00000234329	RP11-767N6.2	processed_pseudogene	other	stage_specific	0.771484	1.51565	1.14357	1.7375	0.727694	1.2326	1.50658	3.81413	2.66036	3.09689	4.75238	3.92463	2.45677	4.32502	3.39089
chr1	45781276	45781957	+	ENSG00000236111	RP11-630I5.1	processed_pseudogene	other	gt_restricted	4.39636	0.809403	2.60288	0.791337	3.57832	2.18483	5.30909	1.29277	3.30093	4.17469	0.70426	2.43947	2.03159	0.678856	1.35522
chr1	45786986	46036124	+	ENSG00000086015	MAST2	protein_coding	coding	constitutive	11.3642	16.5689	13.9665	17.4512	12.2317	14.8415	15.5292	16.5315	16.0303	12.8509	14.1107	13.4808	17.5135	14.0249	15.7692
chr1	45846993	45847594	-	ENSG00000232467	TMA16P2	processed_pseudogene	other	never	0.0408002	0.0111107	0.0259555	0.0257286	0	0.0128643	0	0.0122249	0.00611245	0	0.109957	0.0549785	0	0	0
chr1	46040139	46133036	-	ENSG00000117461	PIK3R3	protein_coding	coding	constitutive	5.38943	4.66956	5.02949	3.12662	7.09907	5.11285	8.22679	10.0483	9.13754	17.5052	13.3466	15.4259	14.6211	14.4158	14.5184
chr1	46043660	46176488	-	ENSG00000278139	RP4-533D7.6	protein_coding	coding	never	1.48e-57	1.31e-67	7.4e-58	5.71e-12	6.88e-17	2.86e-12	2.4e-25	8.52e-20	4.25863e-20	3.07e-35	2.12e-20	1.06e-20	4.49e-22	3.37e-23	2.41229e-22
chr1	46175485	46176478	-	ENSG00000250719	RP11-322N21.2	protein_coding	coding	never	0	0	0	0	0	0	0	0	0	0	0	0	0	0	0
chr1	46046817	46048368	+	ENSG00000226957	RP4-533D7.4	antisense	lncRNA	never	0	0	0	0	0	0	0	0.0217639	0.0108819	0.214845	0.391512	0.303179	0	0	0
chr1	46104949	46105175	+	ENSG00000233114	RP4-533D7.3	processed_pseudogene	other	never	0	0	0	0.140173	0	0.0700865	0	0	0	0	0.532501	0.266251	0	0	0
chr1	46134530	46139081	+	ENSG00000227857	RP4-533D7.5	antisense	lncRNA	never	0.371406	0	0.185703	0.0780697	0.297245	0.187657	0.233428	0.222568	0.227998	0.183092	0.51901	0.351051	0.195378	0.384058	0.289718
chr1	46175072	46185958	+	ENSG00000117472	TSPAN1	protein_coding	coding	stage_specific	0.0416598	0.0836875	0.0626736	0	0.0574563	0.0287282	0.0791673	0.123062	0.101115	2.33873	1.13839	1.73856	4.51594	2.69782	3.60688
chr1	46188681	46220305	-	ENSG00000085998	POMGNT1	protein_coding	coding	constitutive	14.563	17.1721	15.8675	30.0822	28.3469	29.2145	26.2625	19.4294	22.8459	25.3733	32.0982	28.7357	27.172	29.7182	28.4451
chr1	46203333	46221261	+	ENSG00000171357	LURAP1	protein_coding	coding	stage_specific	1.82664	1.51071	1.66867	1.87104	1.69395	1.78249	1.00226	0.909295	0.955777	0.508693	0.638482	0.573588	0.44232	0.617628	0.529974
chr1	46247687	46278473	+	ENSG00000085999	RAD54L	protein_coding	coding	constitutive	20.2852	14.8776	17.5814	6.23656	10.8236	8.53008	15.3678	12.6736	14.0207	5.56353	1.62193	3.59273	15.9482	8.02659	11.9874
chr1	46261195	46303608	-	ENSG00000132128	LRRC41	protein_coding	coding	constitutive	21.1105	24.6984	22.9045	37.3732	34.6058	35.9895	31.3151	26.0137	28.6644	32.5302	30.7147	31.6225	36.6449	33.1338	34.8894
chr1	46303630	46316776	+	ENSG00000173660	UQCRH	protein_coding	coding	constitutive	547.611	302.615	425.113	326.798	518.802	422.8	425.27	294.656	359.963	368.409	163.508	265.959	197.891	149.261	173.576
chr1	46340176	46365152	+	ENSG00000117481	NSUN4	protein_coding	coding	constitutive	7.29865	7.40046	7.34955	7.34918	7.79377	7.57148	7.77593	8.03534	7.90564	10.2991	8.13606	9.21758	10.3159	7.82323	9.06957
chr1	46370585	46370955	+	ENSG00000225779	RP4-603I14.3	processed_pseudogene	other	never	0	0.0545907	0.0272953	0	0.120329	0.0601645	0	0.120131	0.0600655	0	0.060029	0.0300145	0	0	0
chr1	46394264	46413848	+	ENSG00000117480	FAAH	protein_coding	coding	constitutive	3.49355	3.67634	3.58494	3.60906	4.36286	3.98596	13.5987	8.46148	11.0301	8.21564	8.10439	8.16001	8.05344	5.70351	6.87847
chr1	46432128	46482493	+	ENSG00000232022	FAAHP1	transcribed_unprocessed_pseudogene	other	never	0.0561789	0.743557	0.399868	0.166241	0.0721336	0.119187	0.577155	0.569454	0.573304	0.499134	0.731248	0.615191	0.380654	0.20396	0.292307
chr1	46446672	46451281	-	ENSG00000224863	LINC01398	processed_transcript	lncRNA	never	0	0	0	0	0	0	0	0.0103704	0.0051852	0.0255932	0	0.0127966	0	0	0
chr1	46506995	46514226	+	ENSG00000197587	DMBX1	protein_coding	coding	never	0.0118916	0.00971283	0.0108022	0.0637403	0.0214135	0.0425769	0.184908	0.625553	0.40523	0	0.0035609	0.00178045	0.0468991	0.014756	0.0308275
chr1	46532165	46533614	-	ENSG00000282881	RP11-49P4.7	protein_coding	coding	never	0	0	0	0	0	0	0.0120947	0	0.00604735	0.0379465	0.00768332	0.0228149	0	0	0
chr1	46538695	46570255	+	ENSG00000269956	MKNK1-AS1	antisense	lncRNA	never	0.00710676	0	0.00355338	0.0134446	0.00853157	0.0109881	0	0.00425879	0.0021294	0.0964316	0.131344	0.113888	0.00560776	0.00440931	0.00500853
chr1	46557407	46616843	-	ENSG00000079277	MKNK1	protein_coding	coding	constitutive	10.0491	8.79259	9.42084	13.6175	12.7569	13.1872	7.44627	6.09285	6.76956	10.4203	10.0351	10.2277	11.809	8.98529	10.3971
chr1	46607714	46616891	-	ENSG00000142961	MOB3C	protein_coding	coding	stage_specific	0.995307	1.22259	1.10895	1.07165	0.827837	0.949743	1.53894	1.18555	1.36224	3.50655	2.64184	3.0742	2.32408	1.88521	2.10465
chr1	46545643	46551527	-	ENSG00000162456	KNCN	protein_coding	coding	never	0	0	0	0	0	0	0	0	0	0.0334006	0.142759	0.0880798	0	0.00934155	0.00467078
chr1	46632736	46673867	-	ENSG00000123472	ATPAF1	protein_coding	coding	constitutive	43.6147	28.8273	36.221	32.5908	38.8739	35.7323	44.9469	41.6964	43.3216	52.9076	40.5939	46.7507	42.5572	38.7108	40.634
chr1	46668854	46673594	+	ENSG00000186118	TEX38	protein_coding	coding	never	0.103677	0.141652	0.122664	0.0948818	0.178427	0.136654	0.0422678	0.0509139	0.0465909	0.575232	0.551042	0.563137	0.204519	0.0872925	0.145906
chr1	46665909	46666375	-	ENSG00000233647	NENFP1	processed_pseudogene	other	never	0	0.136138	0.068069	0.157625	0	0.0788125	0.0589123	0.187238	0.123075	0	0.112275	0.0561375	0	0.0387712	0.0193856
chr1	46674035	46692098	+	ENSG00000228237	EFCAB14-AS1	antisense	lncRNA	never	0	0	0	0.0358625	0	0.0179312	0	0	0	0.0815049	0.335601	0.208553	0.0434869	0	0.0217435
chr1	46675158	46719064	-	ENSG00000159658	EFCAB14	protein_coding	coding	constitutive	8.89744	13.0181	10.9578	22.4766	13.3245	17.9005	14.4366	16.8495	15.6431	13.832	20.1674	16.9997	12.7557	20.0176	16.3866
chr1	46742328	46743133	+	ENSG00000236476	RP11-8J9.5	processed_pseudogene	other	never	0	0	0	0	0	0	0	0	0	0	0.0160282	0.0080141	0	0	0
chr1	46757837	46819413	+	ENSG00000142973	CYP4B1	protein_coding	coding	never	0.0516998	0	0.0258499	0	0	0	0.542409	0.273163	0.407786	0.129539	0.185221	0.15738	0.164965	0.0852625	0.125114
chr1	46843094	46900437	-	ENSG00000154198	CYP4Z2P	transcribed_unprocessed_pseudogene	other	never	0	0	0	0	0	0	0.0672253	0.101004	0.0841146	0.0191717	0.0543533	0.0367625	0	0	0
chr1	46891638	46892830	+	ENSG00000238145	RP11-346M5.1	processed_pseudogene	other	never	0	0.00440987	0.00220493	0	0.0097202	0.0048601	0.0152666	0.0281424	0.0217045	0.0239492	0.0484918	0.0362205	0.00255562	0	0.00127781
chr1	46929176	46941484	-	ENSG00000187048	CYP4A11	protein_coding	coding	never	0.0343462	0.0282213	0.0312837	0.140077	0.0297661	0.0849215	1.66987	0.661522	1.1657	0.279789	0.968557	0.624173	0.0161791	0	0.00808955
chr1	46967678	46967874	-	ENSG00000259832	CYP4A26P	unprocessed_pseudogene	other	never	0	0	0	0	0	0	0	0	0	0	0	0	0	0	0
chr1	46994381	46994502	-	ENSG00000261196	CYP4A43P	unprocessed_pseudogene	other	never	0	0	0	0	0	0	0	0	0	0	0	0	0	0	0
chr1	47000897	47001087	-	ENSG00000261593	CYP4A27P	unprocessed_pseudogene	other	never	0	0	0	0	0	0	0	0.541355	0.270678	1.33601	0	0.668005	0	0	0
chr1	47002994	47003148	-	ENSG00000261290	CYP4A44P	unprocessed_pseudogene	other	never	0	0	0	0	0	0	0	1.49969	0.749845	0	0	0	0	0	0
chr1	47023567	47050751	+	ENSG00000186377	CYP4X1	protein_coding	coding	stage_specific	0.880401	0.60845	0.744425	0.620497	0.771587	0.696042	12.0216	12.7817	12.4017	3.68657	3.95908	3.82282	0.286053	0.339676	0.312864
chr1	47067487	47118319	+	ENSG00000186160	CYP4Z1	protein_coding	coding	never	0	0	0	0	0	0	0.226855	0.207398	0.217127	0.0277091	0.317118	0.172414	0	0.0299088	0.0149544
chr1	47074777	47075979	-	ENSG00000225154	RP11-184J23.2	processed_pseudogene	other	never	0	0.00436532	0.00218266	0	0.00962201	0.00481101	0.0151124	0.0470705	0.0310914	0.0237073	0.0480019	0.0358546	0.0025298	0	0.0012649
chr1	47096652	47179271	-	ENSG00000225506	CYP4A22-AS1	lincRNA	lncRNA	never	0.626752	0.853381	0.740066	1.03042	0.429947	0.730183	0.949609	0.804828	0.877219	0.860703	0.415574	0.638139	0.229614	0.0833273	0.156471
chr1	47179249	47180339	+	ENSG00000224805	LINC00853	antisense	lncRNA	never	0.212084	0.173263	0.192673	0.200611	0.21217	0.206391	0.199942	0.19064	0.195291	0.313654	0.0846772	0.199166	0.111567	0	0.0557835
chr1	47137434	47149741	+	ENSG00000162365	CYP4A22	protein_coding	coding	never	0.0104886	0	0.0052443	0.00650443	0.0145189	0.0105117	0.058919	0.0822947	0.0706068	0.0166894	0.0292523	0.0229709	0	0	0
chr1	47164509	47165920	-	ENSG00000225514	MTND1P34	transcribed_processed_pseudogene	other	never	0	0	0	0.0436088	0	0.0218044	0	0.0207207	0.0103604	0	0.0207081	0.0103541	0	0	0
chr1	47183592	47191044	-	ENSG00000162366	PDZK1IP1	protein_coding	coding	never	0	0	0	0	0	0	0.21957	0.0992704	0.15942	0.0492044	0	0.0246022	0.0262528	0	0.0131264
chr1	47216289	47232220	-	ENSG00000162367	TAL1	protein_coding	coding	never	0	0.00390178	0.00195089	0	0	0	0.0101309	0.0193202	0.0147256	0.0211905	0.00992276	0.0155566	0.00790543	0.00621594	0.00706068
chr1	47225796	47230750	+	ENSG00000226252	RP1-18D14.7	antisense	lncRNA	never	0	0	0	0	0	0	0	0	0	0	1.42e-36	7.11e-37	0	0.00257476	0.00128738
chr1	47250138	47314147	-	ENSG00000123473	STIL	protein_coding	coding	constitutive	12.411	11.7934	12.1022	13.3041	20.2731	16.7886	7.54146	12.3096	9.92553	3.59082	2.83761	3.21421	9.50947	7.89151	8.70049
chr1	47333796	47378839	+	ENSG00000162368	CMPK1	protein_coding	coding	constitutive	15.5008	14.1178	14.8093	19.2465	21.1075	20.177	11.8837	11.8521	11.8679	16.9565	11.7718	14.3642	15.4853	16.9635	16.2244
chr1	47380927	47408477	-	ENSG00000225762	LINC01389	antisense	lncRNA	never	0.0585692	0.031899	0.0452341	0	0	0	0	0	0	0.0866188	0.21046	0.148539	0	0.0363386	0.0181693
chr1	47416071	47418052	+	ENSG00000186790	FOXE3	protein_coding	coding	never	0.0358836	0.08306	0.0594718	0.0113141	0.0215388	0.0164264	0.0338291	0.0483829	0.041106	0.0663358	0.026863	0.0465994	0.0424721	0.0556588	0.0490654
chr1	47432132	47434641	-	ENSG00000237424	FOXD2-AS1	antisense	lncRNA	never	0.00690875	0.0376276	0.0222682	0.204763	0.0746447	0.139704	0.14329	0.157325	0.150308	0.0613046	0.0165504	0.0389275	0.141739	0.0685832	0.105161
chr1	47436016	47440691	+	ENSG00000186564	FOXD2	protein_coding	coding	never	0	0.0103284	0.0051642	0.0291492	0.021343	0.0252461	0.0134086	0.0277004	0.0205545	0.0736205	0.017036	0.0453283	0.0252516	0.0176489	0.0214503
chr1	47483697	47484162	-	ENSG00000271355	RP4-666O22.3	processed_pseudogene	other	never	0	0	0	0	0	0	0	0	0	0	0.0375729	0.0187864	0	0	0
chr1	47497893	47498341	-	ENSG00000229554	RPL21P24	processed_pseudogene	other	never	0	0	0	0	0	0	0	0	0	0	0	0	0	0	0
chr1	47550195	47550753	+	ENSG00000227883	ATP6V0E1P4	processed_pseudogene	other	never	0	0	0	0	0	0	0	0	0	0	0	0	0	0	0
chr1	47688462	47703383	+	ENSG00000227947	RP11-543D5.1	lincRNA	lncRNA	never	0.0789575	0.0143344	0.0466459	0	0	0	0.0248123	0	0.0124061	0	0	0	0	0	0
chr1	47760527	47996895	-	ENSG00000269113	TRABD2B	protein_coding	coding	constitutive	2.73262	4.3927	3.56266	13.4808	9.1657	11.3232	2.92041	2.35865	2.63953	28.6802	35.1642	31.9222	37.9517	22.2098	30.0807
chr1	47761131	47765547	-	ENSG00000223814	RP11-543D5.2	lincRNA	lncRNA	stage_specific	0.448594	0.322595	0.385595	1.0805	0.221507	0.651003	0.125597	0.346254	0.235926	2.26471	5.1056	3.68515	2.66919	2.62663	2.64791
chr1	47818065	47820237	+	ENSG00000225028	RP11-330M19.1	lincRNA	lncRNA	never	0	0	0	0.0062742	0.0119443	0.00910925	0	0	0	0.16186	0.637584	0.399722	0	0	0
chr1	48050658	48091736	+	ENSG00000226133	RP4-683M8.2	lincRNA	lncRNA	never	0	0	0	0	0	0	0	0	0	0.162713	0.173397	0.168055	0.0217037	0.0712183	0.046461
chr1	48078786	48082196	-	ENSG00000231413	RP11-193P11.3	lincRNA	lncRNA	never	0	0	0	0	0	0	0	0	0	0	0	0	0.147328	0	0.073664
chr1	48089367	48089634	+	ENSG00000237180	CYP46A4P	processed_pseudogene	other	never	0	0	0	0.155687	0	0.0778435	0	0	0	0.365124	0.591435	0.47828	0.292217	0	0.146109
chr1	48096091	48182428	-	ENSG00000242267	SKINT1L	unitary_pseudogene	other	stage_specific	0.0662055	0.132275	0.0992403	4.90735	2.79801	3.85268	0.51166	0.790608	0.651134	1.17368	1.5286	1.35114	0.597188	0.515458	0.556323
chr1	48102067	48104707	+	ENSG00000279096	AL356289.1	protein_coding	coding	never	0	0	0	0.0453376	0.0392318	0.0422847	0.00616177	0	0.00308088	0.0579969	0.274005	0.166001	0.0103147	0.00811035	0.00921252
chr1	48172971	48206857	+	ENSG00000223720	RP5-1024N4.2	lincRNA	lncRNA	never	0.0361526	0.0393802	0.0377664	0.0227979	0	0.0113989	0	0	0	0.534666	0.324774	0.42972	0.0285271	0.134583	0.0815551
chr1	48222684	48248644	+	ENSG00000117834	SLC5A9	protein_coding	coding	stage_specific	0.0209922	0.0344038	0.027698	69.9197	36.6308	53.2752	0.991897	0.566232	0.779065	0.790777	1.41934	1.10506	1.639	3.19353	2.41627
chr1	48227887	48229561	-	ENSG00000272491	RP5-1024N4.4	antisense	lncRNA	never	0.0542736	0.0472951	0.0507843	0.626317	0.27365	0.449983	0.184198	0.182134	0.183166	0.508013	0.483021	0.495517	0.24839	0.33	0.289195
chr1	48262229	48263179	-	ENSG00000279214	RP5-1024N4.5	TEC	lncRNA	never	0.0215043	0	0.0107522	0.0135607	0.0258156	0.0196882	0	0.0257733	0.0128866	0.0636061	0.064394	0.0640001	0.0169685	0.0667106	0.0418396
chr1	48295371	48472208	-	ENSG00000132122	SPATA6	protein_coding	coding	constitutive	9.57553	7.2777	8.42661	20.4453	19.3722	19.9088	7.57566	9.85473	8.71519	14.9734	10.068	12.5207	7.0217	5.91996	6.47083
chr1	48435966	48437223	+	ENSG00000235105	RP11-329A14.1	processed_pseudogene	other	constitutive	2.13876	1.97128	2.05502	1.77965	1.7988	1.78923	1.82064	1.48643	1.65353	3.4887	2.04499	2.76684	1.79149	1.4102	1.60085
chr1	48325079	48326123	-	ENSG00000224986	PPP1R8P1	processed_pseudogene	other	never	0	0.0311662	0.0155831	0.15637	0.0228988	0.0896344	0.07193	0.0342918	0.0531109	0.0564193	0.12566	0.0910396	0.0150513	0.0710077	0.0430295
chr1	48344208	48344315	+	ENSG00000206700	RNU6-723P	snRNA	other	never	0	0	0	0	0	0	0	0	0	0	0	0	0	0	0
chr1	48447935	48448042	+	ENSG00000223175	RNU4-61P	snRNA	other	never	0	0	0	0	0	0	0	0	0	0	0	0	0	0	0
chr1	48497262	48497736	-	ENSG00000232514	RP11-329A14.2	processed_pseudogene	other	never	0	0	0	0.0382028	0	0.0191014	0	0	0	0	0	0	0	0	0
chr1	48532854	50023913	-	ENSG00000186094	AGBL4	protein_coding	coding	never	0.378937	0.368134	0.373536	0.276282	0.125198	0.20074	0.136056	0.179302	0.157679	0.793803	0.4467	0.620251	0.318367	0.48697	0.402668
chr1	48727522	48776969	-	ENSG00000162373	BEND5	protein_coding	coding	constitutive	3.3962	4.23466	3.81543	4.87145	6.22712	5.54929	13.1853	14.926	14.0556	25.5387	35.7809	30.6598	14.9617	18.9531	16.9574
chr1	49048315	49187585	+	ENSG00000229846	RP11-141A19.1	antisense	lncRNA	never	0	0.0172531	0.00862655	0	0	0	0	0	0	0.0468493	0.0379437	0.0423965	0	0	0
chr1	49257410	49269285	+	ENSG00000230114	RP11-141A19.2	antisense	lncRNA	never	0	0	0	0	0	0	0	0	0	0	0	0	0	0	0
chr1	49374200	49472085	-	ENSG00000225623	AGBL4-IT1	sense_intronic	lncRNA	never	0	0	0	0	0	0	0	0	0	0	0.0314755	0.0157377	0	0.0326078	0.0163039
chr1	49691261	49691523	-	ENSG00000237478	RP5-926E3.1	processed_pseudogene	other	never	0	0	0	0	0	0	0	0	0	0	0.629418	0.314709	0	0.163015	0.0815075
chr1	49841820	49846400	+	ENSG00000215887	ZNF859P	unprocessed_pseudogene	other	never	0.0407142	0.00985533	0.0252848	0.0313799	0.00543076	0.0184053	0.0454912	0.0487967	0.0471439	0.0802838	0.0596041	0.069944	0.0713923	0.0561348	0.0637636
chr1	49994317	49996218	+	ENSG00000279324	RP11-93G23.2	TEC	lncRNA	never	0	0	0	0	0	0	0	0	0	0	0.00562709	0.00281355	0	0.00582952	0.00291476
chr1	50017091	50017503	+	ENSG00000233595	MTND2P29	processed_pseudogene	other	never	0	0	0	0	0	0	0	0	0	0	0.0950495	0.0475247	0	0	0
chr1	50048013	50203786	+	ENSG00000162374	ELAVL4	protein_coding	coding	stage_specific	0.584415	0.610468	0.597441	2.4322	3.98505	3.20863	3.92824	4.35292	4.14058	6.80088	5.26286	6.03187	6.1677	7.61535	6.89152
chr1	50114936	50115282	+	ENSG00000230828	RP11-492I2.1	processed_pseudogene	other	never	0	0	0	0.0741746	0	0.0370873	0	0	0	0	0	0	0	0.364896	0.182448
chr1	50174305	50175868	-	ENSG00000237337	RP11-567C20.2	antisense	lncRNA	never	0	0	0	0	0	0	0	0	0	0	0.0294262	0.0147131	0.0581558	0.0152424	0.0366991
chr1	50206083	50223127	-	ENSG00000233407	RP11-567C20.3	antisense	lncRNA	never	0	0	0	0	0	0	0	0	0	0	0.184523	0.0922615	0	0	0
chr1	50326130	50327007	+	ENSG00000234080	RP11-183G22.1	processed_pseudogene	other	never	0.139838	0.201513	0.170676	0.154083	0.174866	0.164474	0.247808	0.243487	0.245647	0.144413	0.172669	0.158541	0.0818268	0.050026	0.0659264
chr1	50398824	50399773	-	ENSG00000229316	HMGB1P45	processed_pseudogene	other	never	0	0	0	0	0	0	0	0	0	0	0	0	0	0	0
chr1	50405429	50406024	-	ENSG00000225671	FCF1P6	processed_pseudogene	other	never	0	0	0	0	0.0497475	0.0248738	0	0.0124165	0.00620825	0.0612853	0	0.0306427	0.0326988	0	0.0163494
chr1	50417549	50423500	-	ENSG00000142700	DMRTA2	protein_coding	coding	never	0	0.00295488	0.00147744	0.0647684	0.0716451	0.0682067	0.0683897	0.0361863	0.052288	0.0357213	0.0227463	0.0292338	0.0476483	0.037543	0.0425956
chr1	50437027	50960263	-	ENSG00000185104	FAF1	protein_coding	coding	constitutive	29.8925	30.2228	30.0576	43.6096	35.3378	39.4737	22.2174	26.8215	24.5194	19.9835	21.3242	20.6538	17.3572	17.2533	17.3053
chr1	50461468	50471150	+	ENSG00000225767	RP5-850O15.3	antisense	lncRNA	never	0	0	0	0	0	0	0	0	0	0	0.326655	0.163327	0	0	0
chr1	50582403	50582511	+	ENSG00000207194	RNU6-1026P	snRNA	other	never	0	0	0	0	0	0	0	0	0	0	0	0	0	0	0
chr1	50780339	50781150	+	ENSG00000230585	PHBP12	processed_pseudogene	other	never	0	0.0432904	0.0216452	0	0	0	0	0	0	0.0391837	0.190412	0.114798	0	0.0164385	0.00821925
chr1	50846467	50846837	+	ENSG00000237130	MRPS6P2	processed_pseudogene	other	never	0	0	0	0	0	0	0	0	0	0	0.300145	0.150072	0	0	0
chr1	50960744	50974633	+	ENSG00000123080	CDKN2C	protein_coding	coding	de_restricted	0	0	0	1.90467	1.46482	1.68474	0.143712	0.101493	0.122603	0.0876682	0.0659072	0.0767877	0.247236	0.0998286	0.173532
chr1	51059836	51059905	+	ENSG00000265538	MIR4421	miRNA	other	never	0	0	0	0	0	0	0	0	0	0	0	0	0	0	0
chr1	51060017	51060103	+	ENSG00000275816	MIR6500	miRNA	other	never	0	0	0	0	0	0	0	0	0	0	0	0	0	0	0
chr1	51102233	51148086	+	ENSG00000204006	C1orf185	protein_coding	coding	never	0	0	0	0	0	0	0	0	0	0	0	0	0	0	0
chr1	51107221	51107331	-	ENSG00000200262	Y_RNA	misc_RNA	other	never	0	0	0	0	0	0	0	0	0	0	0	0	0	0	0
chr1	51157787	51158471	-	ENSG00000213478	CFL1P2	processed_pseudogene	other	never	0.0168124	0.0915664	0.0541894	0.0636113	0.020183	0.0418972	0.0633992	0.0402998	0.0518495	0.024864	0.0604129	0.0426385	0.0353765	0.0208621	0.0281193
chr1	51195094	51235096	-	ENSG00000203356	LINC01562	lincRNA	lncRNA	never	0.00982322	0.0160503	0.0129368	0.0325213	0.0353779	0.0339496	0.0208368	0.00882997	0.0148334	0.0326873	0.0573599	0.0450236	0.0232537	0.0274262	0.0253399
chr1	51236270	51273455	+	ENSG00000123091	RNF11	protein_coding	coding	constitutive	32.0199	32.1872	32.1035	54.6878	55.461	55.0744	36.0816	35.4778	35.7797	55.3087	44.6869	49.9978	41.7638	38.4118	40.0878
chr1	51250602	51251472	-	ENSG00000233406	RP11-296A18.5	processed_pseudogene	other	stage_specific	1.22645	2.05462	1.64054	1.85306	1.24725	1.55015	2.72879	5.22666	3.97772	0.817438	2.39133	1.60438	1.73302	1.61715	1.67508
chr1	51264915	51266074	-	ENSG00000236434	RP11-296A18.6	antisense	lncRNA	never	0	0	0	0	0	0	0	0	0	0.105268	0.170515	0.137892	0	0	0
chr1	51287257	51345116	-	ENSG00000085831	TTC39A	protein_coding	coding	constitutive	5.41155	6.47837	5.94496	5.87037	5.35751	5.61394	5.63209	4.16624	4.89916	8.2506	7.01802	7.63431	15.0595	10.83	12.9448
chr1	51329653	51335324	+	ENSG00000261664	TTC39A-AS1	antisense	lncRNA	never	0	0	0	0	0	0	0.0437511	0.0158509	0.029801	0.156474	0.360948	0.258711	0.618998	0.776238	0.697618
chr1	51354262	51519328	-	ENSG00000085832	EPS15	protein_coding	coding	constitutive	12.0015	15.2265	13.614	13.6684	12.8531	13.2607	7.43677	10.5408	8.98879	8.80572	9.55561	9.18066	11.3036	13.5144	12.409
chr1	51372269	51373224	+	ENSG00000232027	RP11-275F13.3	processed_pseudogene	other	never	0	0	0	0.0134694	0	0.0067347	0	0	0	0.063178	0.153506	0.108342	0	0	0
chr1	51382307	51382414	+	ENSG00000206595	RNU6-877P	snRNA	other	never	0	0	0	0	0	0	0	0	0	0	0	0	0	0	0
chr1	51461720	51463416	+	ENSG00000238140	RP11-253A20.1	antisense	lncRNA	never	0	0	0	0	0	0	0	0	0	0	0.0815878	0.0407939	0	0	0
chr1	51518308	51561629	+	ENSG00000227070	RP11-191G24.1	antisense	lncRNA	never	0	0.31351	0.156755	0.248001	0.472124	0.360063	0	0.344951	0.172476	0	0.344741	0.172371	0.0832176	0.0654329	0.0743252
chr1	51538624	51538729	-	ENSG00000252032	RNU6-1281P	snRNA	other	never	0	0	0	0	0	0	0	0	0	0	0	0	0	0	0
chr1	51561865	51594897	-	ENSG00000227742	CALR4P	unitary_pseudogene	other	never	0	0	0	0	0	0	0	0	0	0	0	0	0	0	0
chr1	51577178	51798427	+	ENSG00000117859	OSBPL9	protein_coding	coding	constitutive	39.5309	29.715	34.623	28.0339	36.8234	32.4286	25.7636	31.0923	28.4279	47.1828	27.0808	37.1318	44.7681	37.1062	40.9372
chr1	51793933	51799154	+	ENSG00000266993	RP4-657D16.3	antisense	lncRNA	never	4.45e-78	0.0301305	0.0150653	0.092995	2.86e-69	0.0464975	0.0207512	0.0585637	0.0396574	0.812579	2.65326	1.73292	0.277357	0.281283	0.27932
chr1	51801027	51801307	+	ENSG00000272175	RP4-657D16.6	antisense	lncRNA	never	0	0	0	0	0	0	0	0	0	0.627567	1.14361	0.885589	0.167419	0.394918	0.281168
chr1	51789190	51878937	-	ENSG00000078618	NRDC	protein_coding	coding	constitutive	68.6592	68.5087	68.584	49.4043	55.6563	52.5303	44.5088	53.6288	49.0688	74.9951	87.6763	81.3357	66.101	69.7053	67.9031
chr1	51707137	51708137	-	ENSG00000236973	GAPDHP51	processed_pseudogene	other	never	0	0	0	0	0	0	0	0	0	0	0.0964925	0.0482462	0	0	0
chr1	51709061	51709940	+	ENSG00000232846	SLC25A6P3	processed_pseudogene	other	never	0	0.0259178	0.0129589	0.0300085	0	0.0150043	0.0672939	0	0.033647	0	0.0284997	0.0142498	0.0187749	0.0885747	0.0536748
chr1	51724774	51724896	-	ENSG00000212624	SNORA26	snoRNA	other	never	0	0	0	0	0	0	0	0	0	0	0	0	0	0	0
chr1	51859777	51860135	+	ENSG00000230604	TSEN15P2	processed_pseudogene	other	never	0	0	0	0	0	0	0	0	0	0	0.129691	0.0648455	0	0	0
chr1	51907955	51990764	-	ENSG00000169213	RAB3B	protein_coding	coding	constitutive	8.83352	11.4671	10.1503	24.8545	14.8615	19.858	16.2471	17.4197	16.8334	20.1703	28.7212	24.4458	15.3844	20.0384	17.7114
chr1	51973409	51973535	+	ENSG00000200839	RNA5SP48	rRNA	other	never	0	0	0	0	0	0	0	0	0	0	26.1944	13.0972	0	0	0
chr1	51980472	51980814	+	ENSG00000229032	RP11-91A18.1	processed_pseudogene	other	never	0	0	0	0	0	0	0	0	0	0.358143	0.797676	0.577909	0	0.00834719	0.0041736
chr1	51995739	51996039	+	ENSG00000264613	RN7SL290P	misc_RNA	other	never	0	0	0	0	0	0	0	0	0	0	0	0	0	0	0
chr1	52020130	52056171	-	ENSG00000117862	TXNDC12	protein_coding	coding	constitutive	67.0152	58.3845	62.6998	54.151	51.8816	53.0163	54.2381	58.5823	56.4102	65.3121	58.098	61.705	73.0131	66.8878	69.9505
chr1	52032102	52033816	-	ENSG00000198841	KTI12	protein_coding	coding	constitutive	1.79328	2.12255	1.95792	1.78277	1.75883	1.7708	2.38148	1.76206	2.07177	1.95902	2.36667	2.16284	2.36646	2.15157	2.25902
chr1	52033390	52044279	+	ENSG00000223390	RP11-91A18.4	antisense	lncRNA	never	0.0577113	0.0314317	0.0445715	0	0.0346408	0.0173204	0.0272035	0.017292	0.0222478	0.122109	0.169681	0.145895	0	0.0179032	0.0089516
chr1	52056124	52090716	+	ENSG00000134717	BTF3L4	protein_coding	coding	constitutive	48.1257	36.7741	42.4499	31.2421	39.4524	35.3473	46.8331	50.825	48.8291	54.5738	36.866	45.7199	32.6281	41.3905	37.0093
chr1	52050917	52052683	+	ENSG00000228369	TXNDC12-AS1	antisense	lncRNA	never	0	0	0	0	0	0	0	0	0	0.131053	0.212282	0.171668	0	0	0
chr1	52142093	52346686	+	ENSG00000157077	ZFYVE9	protein_coding	coding	constitutive	7.86369	6.47344	7.16857	7.10522	8.7345	7.91986	9.33813	10.0694	9.70377	11.3229	8.70245	10.0127	8.16098	8.44218	8.30158
chr1	52353486	52353877	+	ENSG00000272100	RP11-155O18.6	antisense	lncRNA	pp1_restricted	0	0.193051	0.0965255	0.223521	0.10638	0.16495	0.250622	0.37172	0.311171	1.0678	1.31936	1.19358	0.349616	0.274899	0.312258
chr1	52345722	52366193	-	ENSG00000154222	CC2D1B	protein_coding	coding	constitutive	16.507	25.7839	21.1455	18.0516	24.2237	21.1377	19.1921	11.2157	15.2039	13.9054	22.2382	18.0718	14.9848	21.1405	18.0627
chr1	52150103	52150419	+	ENSG00000241745	RN7SL788P	misc_RNA	other	never	0	0.0811364	0.0405682	0	0	0	0	0.0892735	0.0446368	0.220319	0.0892192	0.154769	0.235102	0.184857	0.20998
chr1	52160260	52160600	-	ENSG00000228407	RP4-800M22.1	processed_pseudogene	other	stage_specific	1.4746	2.97825	2.22642	2.15682	1.1064	1.63161	1.56395	3.93968	2.75182	2.36254	4.30525	3.3339	0.533302	2.32537	1.42934
chr1	52162185	52163026	-	ENSG00000223429	RP4-800M22.2	processed_pseudogene	other	never	0	0	0	0	0	0	0	0	0	0.111944	0.19644	0.154192	0	0	0
chr1	52179847	52180553	+	ENSG00000224255	PDCL3P6	processed_pseudogene	other	never	0.0321271	0.0874881	0.0598076	0.0506484	0.0385681	0.0446083	0	0.240655	0.120328	0	0.141099	0.0705495	0.0507013	0.0847148	0.0677081
chr1	52189915	52190309	-	ENSG00000236004	RP4-800M22.4	processed_pseudogene	other	never	0	0	0	0	0	0	0	0	0	0	0	0	0	0	0
chr1	52252061	52252773	-	ENSG00000237663	DNAJC19P7	processed_pseudogene	other	never	0	0	0	0	0	0	0	0	0	0	0.0714666	0.0357333	0	0	0
chr1	52253620	52254176	+	ENSG00000213735	ANAPC10P1	processed_pseudogene	other	never	0.346037	0.326672	0.336355	0.523707	0.498495	0.511101	0.26098	0.525326	0.393153	0.0682345	0.511191	0.289713	0.163829	0.343511	0.25367
chr1	52368676	52369244	+	ENSG00000224680	PLA2G12AP1	processed_pseudogene	other	constitutive	3.61121	4.17236	3.89179	2.70363	3.0953	2.89947	2.781	2.75181	2.7664	2.92308	2.54988	2.73648	3.12508	2.35118	2.73813
chr1	52372828	52404459	-	ENSG00000085840	ORC1	protein_coding	coding	constitutive	21.7739	15.1435	18.4587	3.3023	5.02816	4.16523	10.9397	9.55162	10.2457	3.9368	1.62972	2.78326	6.71675	4.11282	5.41479
chr1	52404563	52420839	+	ENSG00000134748	PRPF38A	protein_coding	coding	constitutive	40.9451	26.8951	33.9201	25.1635	38.3164	31.74	29.5851	27.3146	28.4499	36.8089	24.2077	30.5083	29.269	25.5028	27.3859
chr1	52408281	52553487	-	ENSG00000134744	ZCCHC11	protein_coding	coding	constitutive	30.272	37.089	33.6805	85.8186	85.423	85.6208	48.4159	46.6275	47.5217	70.7294	67.2392	68.9843	64.1547	58.7496	61.4522
chr1	52554817	52555273	+	ENSG00000272371	RP11-25O10.2	lincRNA	lncRNA	never	0	0.0354296	0.0177148	0.164087	0	0.0820435	0.429291	0.233897	0.331594	0	0.584386	0.292193	0.153992	0.161442	0.157717
chr1	52573113	52573816	+	ENSG00000236290	EEF1GP7	processed_pseudogene	other	never	0	0.105627	0.0528135	0.0611495	0.116411	0.0887803	0.152364	0.0968504	0.124607	0.0956071	0.154866	0.125237	0.153033	0.160438	0.156735
chr1	52602371	52609051	+	ENSG00000116157	GPX7	protein_coding	coding	constitutive	7.65267	6.07411	6.86339	7.23381	8.75414	7.99397	6.0591	5.05786	5.55848	7.94658	3.96026	5.95342	7.01641	5.90927	6.46284
chr1	52633343	52669683	+	ENSG00000182183	FAM159A	protein_coding	coding	stage_specific	0.617488	0.621675	0.619582	2.90568	4.51164	3.70866	1.55407	1.15039	1.35223	0.682066	0.222118	0.452092	0.356939	0.263357	0.310148
chr1	52684450	52698366	-	ENSG00000162377	COA7	protein_coding	coding	constitutive	19.7124	14.9333	17.3228	7.05754	9.49502	8.27628	7.18589	7.11813	7.15201	4.44593	2.80931	3.62762	3.76243	3.47161	3.61702
chr1	52709121	52709442	+	ENSG00000233664	NDUFS5P3	processed_pseudogene	other	never	0	0	0	0	0	0	0	0	0	0	0	0	0	0	0
chr1	52714398	52714695	+	ENSG00000239640	RN7SL62P	misc_RNA	other	never	0	0	0	0	0	0	0	0	0	0	0	0	0	0	0
chr1	52726466	52827342	+	ENSG00000162378	ZYG11B	protein_coding	coding	constitutive	3.90469	4.68002	4.29235	4.93607	4.02816	4.48212	3.69268	6.32946	5.01107	5.00848	6.64704	5.82776	4.22743	6.12021	5.17382
chr1	52754321	52754462	+	ENSG00000252018	RNU2-30P	snRNA	other	never	4.13938	0	2.06969	0	0	0	0	0	0	0	0	0	0	2.56823	1.28411
chr1	52772193	52772648	-	ENSG00000228929	RPS13P2	processed_pseudogene	other	constitutive	28.2833	23.3197	25.8015	24.9889	24.4655	24.7272	31.8777	37.6036	34.7407	25.7766	26.1383	25.9575	12.4989	21.5129	17.0059
chr1	52805107	52805212	-	ENSG00000206627	RNU6-969P	snRNA	other	never	0	0	0	0	0	0	0	0	0	0	0	0	0	0	0
chr1	52842510	52894998	+	ENSG00000203995	ZYG11A	protein_coding	coding	es_restricted	1.38851	2.93539	2.16195	0.35028	0.391577	0.370928	0.27412	0.357436	0.315778	0.385924	0.293958	0.339941	0.00882464	0.00851194	0.00866829
chr1	52881215	52881730	-	ENSG00000242391	RP4-631H13.2	antisense	lncRNA	never	0	0	0	0	0	0	0.0889534	0	0.0444767	0	0	0	0	0.117084	0.058542
chr1	52895909	52927212	-	ENSG00000121310	ECHDC2	protein_coding	coding	constitutive	12.3739	19.9241	16.149	18.6723	9.97127	14.3218	49.8848	38.8045	44.3447	38.886	41.59	40.238	24.8271	22.4857	23.6564
chr1	52920421	52920596	+	ENSG00000230953	RP4-631H13.6	processed_pseudogene	other	stage_specific	1.31387	0.477056	0.895463	0	0	0	3.71594	0.393674	2.05481	5.82931	26.4913	16.1603	1.20953	2.3776	1.79357
chr1	52925248	52925423	-	ENSG00000231866	RP4-631H13.4	processed_pseudogene	other	never	0	0	0	0	0	0	0	0	0	0	0.786869	0.393435	0	0	0
chr1	52927228	53051703	+	ENSG00000116171	SCP2	protein_coding	coding	constitutive	24.299	20.0339	22.1665	16.0031	17.8069	16.905	23.6761	32.0676	27.8718	28.6578	26.9283	27.7931	22.3062	28.9228	25.6145
chr1	52994725	52996026	+	ENSG00000226147	TUBBP10	processed_pseudogene	other	never	0.0514708	1.04e-11	0.0257354	0.0643275	0.0174944	0.040911	0.0531905	0.166868	0.110029	0.03164	0.0476185	0.0396292	0.047019	0.0928339	0.0699265
chr1	52993200	52993702	-	ENSG00000236360	RP11-334A14.2	processed_pseudogene	other	constitutive	11.6577	13.9057	12.7817	5.88456	7.78593	6.83524	4.82438	5.64128	5.23283	4.34551	4.04541	4.19546	3.26061	4.00696	3.63379
chr1	52928673	52928772	+	ENSG00000264834	MIR1273F	miRNA	other	never	0	0	0	0	0	0	0	0	0	0	0	0	0	0	0
chr1	52934929	52935017	+	ENSG00000266188	MIR5095	miRNA	other	never	0	0	0	0	0	0	0	0	0	0	0	0	0	0	0
chr1	52940313	52940413	+	ENSG00000265815	MIR1273G	miRNA	other	never	0	0	0	0	0	0	0	0	0	0	0	0	0	0	0
chr1	52943535	52943930	-	ENSG00000237279	RP4-631H13.5	processed_pseudogene	other	never	0	0	0	0	0	0	0	0	0	0	0.0519189	0.0259594	0	0	0
chr1	53053623	53054949	-	ENSG00000279054	AL445183.1	protein_coding	coding	never	0	0	0	0	0	0	0	0	0	0	0	0	0	0	0
chr1	53062051	53085502	+	ENSG00000174348	PODN	protein_coding	coding	gt_restricted	0.104934	0.100389	0.102662	0	0	0	6.47237	7.63843	7.0554	0	0	0	0.246481	0.179988	0.213234
chr1	53069937	53085502	-	ENSG00000232993	RP11-334A14.5	antisense	lncRNA	never	0	0	0	0	0	0	0	0	0	0	0	0	0	0	0
chr1	53073109	53073389	-	ENSG00000227644	HIGD1AP11	processed_pseudogene	other	never	0	0	0	0	0	0	0	0	0	0	0	0	0	0	0
chr1	53087178	53142632	-	ENSG00000162383	SLC1A7	protein_coding	coding	never	0.00749172	0.0263861	0.0169389	0	0	0	0.472461	0.534791	0.503626	0.0214531	0	0.0107265	0.017358	0.0121802	0.0147691
chr1	53114575	53118609	+	ENSG00000235563	RP11-334A14.8	antisense	lncRNA	never	0.00956572	0.00520985	0.00738779	0	0	0	0.0811624	0.0458587	0.0635105	0	0	0	0.00754806	0.00593494	0.0067415
chr1	53180920	53186900	+	ENSG00000277397	RP5-1024G6.9	unprocessed_pseudogene	other	never	0	0	0	0	0	0	0	0	0	0	0	0	0	0	0
chr1	53196428	53214197	+	ENSG00000157184	CPT2	protein_coding	coding	constitutive	15.794	14.9128	15.3534	11.6309	13.6333	12.6321	13.5959	10.484	12.0399	10.8362	9.5541	10.1951	9.32088	8.25481	8.78785
chr1	53209782	53213775	-	ENSG00000236723	RP5-1024G6.2	antisense	lncRNA	stage_specific	0.882677	1.43382	1.15825	1.36763	1.3062	1.33692	1.55578	1.2792	1.41749	1.26789	1.90344	1.58567	1.81321	1.82025	1.81673
chr1	53214098	53220617	-	ENSG00000162384	C1orf123	protein_coding	coding	constitutive	35.3983	29.5514	32.4749	31.9002	40.4722	36.1862	36.4644	30.8471	33.6557	38.4008	29.5184	33.9596	30.0723	27.3044	28.6883
chr1	53220662	53224253	+	ENSG00000259818	RP5-1024G6.7	antisense	lncRNA	never	0.0140893	0.0255786	0.0198339	0.0148079	0.00563801	0.010223	0.0132826	0.00844314	0.0108629	0.0208369	0.0365647	0.0287008	0.0111175	0.00291385	0.00701567
chr1	53226891	53238610	-	ENSG00000162385	MAGOH	protein_coding	coding	constitutive	108.603	44.6526	76.6278	43.6055	79.2851	61.4453	80.3652	67.9844	74.1748	94.9856	55.552	75.2688	64.5123	57.0235	60.7679
chr1	53242363	53328070	-	ENSG00000157193	LRP8	protein_coding	coding	stage_specific	34.182	44.4244	39.3032	19.3856	25.2889	22.3373	2.78679	1.50092	2.14385	0.978363	1.06511	1.02174	1.59905	0.621588	1.11032
chr1	53238609	53242783	+	ENSG00000226754	RP5-1024G6.5	antisense	lncRNA	never	0.262042	0.222997	0.242519	0.165244	0.255594	0.210419	0.339679	0.225732	0.282705	0.293497	0.397226	0.345361	0.529849	0.416613	0.473231
chr1	53267934	53268601	+	ENSG00000234578	RP4-784A16.1	antisense	lncRNA	never	0	0	0	0	0	0	0	0	0	0	0.00488861	0.0024443	0	0	0
chr1	53288023	53289706	+	ENSG00000228838	RP4-784A16.2	antisense	lncRNA	never	0.0342784	0.0186693	0.0264739	0.10808	0.0411508	0.0746154	0.0646317	0.102708	0.0836699	0.231275	0.0289476	0.130111	0.0270482	0	0.0135241
chr1	53291790	53292138	-	ENSG00000225030	RP4-784A16.3	sense_intronic	lncRNA	never	0.745108	0.608721	0.676914	0	0.894492	0.447246	0	0.223256	0.111628	0	0	0	0	0	0
chr1	53304535	53307462	+	ENSG00000232762	RP4-784A16.4	antisense	lncRNA	never	0	0	0	0	0	0	0	0	0	0	0	0	0	0	0
chr1	53328232	53336509	+	ENSG00000225675	RP4-784A16.5	lincRNA	lncRNA	never	1.073	0.973995	1.0235	0.225545	0.161015	0.19328	0.0421487	0.0267919	0.0344703	0	0	0	0.0352782	0	0.0176391
chr1	53348487	53349233	-	ENSG00000226938	RP11-117D22.1	lincRNA	lncRNA	never	0	0	0	0.116938	0	0.058469	0	0	0	0	0	0	0	0	0
chr1	53366667	53368245	-	ENSG00000230138	RP11-117D22.2	lincRNA	lncRNA	never	0	0	0	0.549022	0.238899	0.39396	0.023451	0	0.0117255	0	0	0	0	0	0
chr1	53413148	53440020	-	ENSG00000236253	SLC25A3P1	transcribed_processed_pseudogene	other	de_restricted	0	0.00372706	0.00186353	6.27539	3.80498	5.04019	0	0	0	0	0.0383305	0.0191653	0	0	0
chr1	53459398	53467488	+	ENSG00000143006	DMRTB1	protein_coding	coding	never	0.158882	0.0356314	0.0972567	0.0648296	0.044879	0.0548543	0	0	0	0	0	0	0	0	0
chr1	53506236	53738106	-	ENSG00000174332	GLIS1	protein_coding	coding	never	0.0488759	0.0466054	0.0477407	0.71691	1.10091	0.90891	0.403566	0.186878	0.295222	0.0361763	0.0402518	0.038214	0.0192833	0.0303245	0.0248039
chr1	53688748	53688812	-	ENSG00000239007	RNU7-95P	snRNA	other	never	0	0	0	0	0	0	0	0	0	0	0	0	0	0	0
chr1	53765459	53838860	-	ENSG00000058804	NDC1	protein_coding	coding	constitutive	20.7543	18.968	19.8611	8.52125	10.8703	9.69577	11.0617	17.7574	14.4095	8.17328	6.59472	7.384	9.37359	10.4016	9.88759
chr1	53771017	53771153	-	ENSG00000201003	SNORA58	snoRNA	other	never	0	8.4672	4.2336	3.26788	0	1.63394	0	3.10546	1.55273	7.66397	0	3.83198	0	0	0
chr1	53841546	53841832	+	ENSG00000229687	RP4-654H19.2	processed_pseudogene	other	never	0	0	0	0	0	0	0	0	0	0	0	0	0	0	0
chr1	53851718	53889834	-	ENSG00000058799	YIPF1	protein_coding	coding	constitutive	14.7567	11.9206	13.3386	12.5183	18.0448	15.2815	15.2396	15.7392	15.4894	31.6553	25.0164	28.3359	17.109	18.6224	17.8657
chr1	53891238	53911086	+	ENSG00000211452	DIO1	protein_coding	coding	pp1_restricted	0	0.0504104	0.0252052	0.00691793	0	0.00345897	0	0.0490172	0.0245086	16.4073	14.965	15.6861	0.189369	0.204633	0.197001
chr1	53916573	53945929	-	ENSG00000081870	HSPB11	protein_coding	coding	constitutive	13.3264	14.7018	14.0141	14.9649	13.5825	14.2737	10.6804	10.1789	10.4297	23.1362	28.8162	25.9762	14.176	18.6069	16.3914
chr1	53946076	53968168	+	ENSG00000116212	LRRC42	protein_coding	coding	constitutive	16.4433	15.6184	16.0309	15.6697	19.4314	17.5506	16.0147	14.0695	15.0421	85.3	72.4998	78.8999	26.3487	27.3482	26.8484
chr1	53974968	53976031	-	ENSG00000219102	HNRNPA3P12	processed_pseudogene	other	never	0.223784	0.0990286	0.161406	0.0705593	0.0559687	0.063264	0.0688589	0.126096	0.0974774	0.243622	0.146122	0.194872	0.0220728	0.0703864	0.0462296
chr1	54007298	54018186	-	ENSG00000203985	LDLRAD1	protein_coding	coding	never	0	0	0	0	0	0	0	0.0331959	0.016598	0.0531034	0.0210804	0.0370919	0.0431352	0.0820785	0.0626069
chr1	54026680	54053504	-	ENSG00000116209	TMEM59	protein_coding	coding	constitutive	78.1135	68.7039	73.4087	64.4612	66.6923	65.5768	83.2669	83.9469	83.6069	177.334	179.751	178.542	144.395	186.845	165.62
chr1	54033125	54034880	-	ENSG00000280378	RP4-758J24.6	TEC	lncRNA	never	0.164558	0.25487	0.209714	0.214027	0.0987749	0.156401	0.397537	0.468411	0.432974	0.806154	1.00401	0.905082	0.876477	1.21561	1.04604
chr1	54053586	54112519	+	ENSG00000116205	TCEANC2	protein_coding	coding	constitutive	1.9469	1.99641	1.97165	1.35903	1.44137	1.4002	1.6013	1.91967	1.76049	2.14313	2.21898	2.18106	1.6382	1.84718	1.74269
chr1	54099967	54100224	-	ENSG00000279049	AL353898.1	pseudogene	other	pp1_restricted	0	0.15265	0.076325	0.176744	0	0.088372	0	0	0	5.39293	1.71716	3.55504	0.221161	0.173896	0.197528
chr1	54089855	54090093	+	ENSG00000225183	RP4-758J24.4	processed_pseudogene	other	never	0.366895	0	0.183448	0.694093	0.440452	0.567272	0.345889	0.219865	0.282877	0	0.329597	0.164798	0.579014	0	0.289507
chr1	54132685	54200073	-	ENSG00000256407	RP11-446E24.4	protein_coding	coding	never	0.00792235	0.074657	0.0412897	0.00855088	0.0568766	0.0327137	0.0493883	0.0387886	0.0440885	0.0691187	0.0601138	0.0646163	3.53e-56	0.0209329	0.0104665
chr1	54132967	54153770	-	ENSG00000157211	CDCP2	protein_coding	coding	never	0.00631993	0.0044088	0.00536437	0.00709242	1.69e-240	0.00354621	0.00595809	0.0502226	0.0280903	4.71e-193	0.0125597	0.00627985	0.0354991	0.00784226	0.0216707
chr1	54169650	54200036	-	ENSG00000215883	CYB5RL	protein_coding	coding	constitutive	5.03492	4.7151	4.87501	2.11614	2.08918	2.10266	2.79839	2.93756	2.86797	3.10768	2.32601	2.71685	3.05059	2.54623	2.79841
chr1	54225431	54413479	-	ENSG00000157216	SSBP3	protein_coding	coding	constitutive	70.1124	66.8404	68.4764	244.457	213.415	228.936	185.206	154.408	169.807	124.12	137.334	130.727	123.082	109.597	116.34
chr1	54137745	54142980	+	ENSG00000280425	RP11-446E24.3	antisense	lncRNA	never	0	0	0	0.0105183	0.00400478	0.00726154	0.00314497	0.00199911	0.00257204	0	0.00709189	0.00354594	0.00526464	0.00620928	0.00573696
chr1	54184040	54225464	+	ENSG00000116221	MRPL37	protein_coding	coding	constitutive	76.4785	53.5022	64.9904	32.5804	48.1536	40.367	35.211	28.7829	31.9969	36.8098	22.7799	29.7949	33.5456	25.3821	29.4639
chr1	54236439	54239063	+	ENSG00000198711	SSBP3-AS1	antisense	lncRNA	pp1_restricted	0.00657934	0.0215001	0.0140397	0.107872	0.00789841	0.0578852	0.0372159	0.0157709	0.0264934	1.83902	3.82803	2.83352	0.0311495	0.0489849	0.0400672
chr1	54285404	54287371	+	ENSG00000225632	RP5-997D24.3	antisense	lncRNA	never	0	0	0	0	0	0	0	0	0	0.0522143	0.158583	0.105399	0	0	0
chr1	54416255	54420860	+	ENSG00000232245	RP4-705F19.1	lincRNA	lncRNA	never	0	0	0	0	0.462377	0.231188	0.181553	0	0.0907765	0	0.115334	0.057667	0	0	0
chr1	54516411	54517259	-	ENSG00000235741	RP5-866L20.1	lincRNA	lncRNA	never	0	0	0	0	0	0	0	0	0	0.0498336	0	0.0249168	0	0	0
chr1	54524823	54524931	+	ENSG00000237173	RP5-866L20.2	processed_pseudogene	other	never	0	0	0	0	0	0	0	0	0	0	0	0	0	0	0
chr1	54536795	54537758	+	ENSG00000227453	HNRNPA1P63	processed_pseudogene	other	never	0.00950943	0.00690559	0.00820751	0.00266518	0.0253687	0.0140169	0.0506592	0.0791473	0.0649032	0	0.0177182	0.0088591	0.0233447	0.0104889	0.0169168
chr1	54542256	54639192	+	ENSG00000162390	ACOT11	protein_coding	coding	stage_specific	1.84207	1.91811	1.88009	1.55273	1.34648	1.44961	0.974417	0.880514	0.927466	0.287426	0.246772	0.267099	0.779212	0.6765	0.727856
chr1	54609181	54623556	-	ENSG00000162391	FAM151A	protein_coding	coding	never	0.0515251	0.0490146	0.0502698	0.0324917	0	0.0162458	0.0849039	0.0212157	0.0530598	0.119468	0.0415371	0.0805026	0.083835	0.0274569	0.0556459
chr1	54621476	54628438	-	ENSG00000230728	RP11-240D10.4	sense_overlapping	lncRNA	never	0	0	0	0	0	0	0	0	0	0.0571096	0	0.0285548	0	0	0
chr1	54641753	54710266	+	ENSG00000184313	MROH7	protein_coding	coding	never	0.0161141	0.140012	0.078063	0.20744	0.0010602	0.10425	0.430608	0.407559	0.419083	0.0607924	0.0409501	0.0508712	0.136541	0.192729	0.164635
chr1	54641785	54742308	+	ENSG00000271723	MROH7-TTC4	protein_coding	coding	never	5.43e-43	0.0135021	0.00675105	0.0418251	0.0235876	0.0327064	0.0124905	0.0614673	0.0369789	0.0273375	0.0292831	0.0283103	0.00403652	0.0176258	0.0108312
chr1	54715821	54742657	+	ENSG00000243725	TTC4	protein_coding	coding	constitutive	19.3241	12.5003	15.9122	9.46601	12.0801	10.7731	10.5776	10.4599	10.5188	14.4291	9.2838	11.8565	8.57679	8.21604	8.39641
chr1	54756897	54764514	-	ENSG00000162396	PARS2	protein_coding	coding	constitutive	4.10301	5.27896	4.69099	4.43413	3.50681	3.97047	4.11335	4.61018	4.36177	4.82581	4.57621	4.70101	3.82996	3.76315	3.79656
chr1	54779711	54801267	-	ENSG00000006555	TTC22	protein_coding	coding	never	0.621973	1.12983	0.875901	0.224236	0.130931	0.177584	0.138376	0.0392514	0.0888137	0.265143	0.155481	0.210312	0.391085	0.36465	0.377868
chr1	54792884	54794905	+	ENSG00000237453	RP11-67L3.2	antisense	lncRNA	never	0	0	0	0	0	0	0	0	0	0	0	0	0	0	0
chr1	54806062	54842252	+	ENSG00000162398	LEXM	protein_coding	coding	never	0.132338	0.0961673	0.114253	0.00695363	0	0.00347681	0	0	0	0	0.0264181	0.013209	0	0	0
chr1	54849632	54887218	-	ENSG00000116133	DHCR24	protein_coding	coding	constitutive	162.337	140.394	151.365	183.794	260.021	221.907	25.4122	9.66171	17.537	30.99	24.4906	27.7403	20.5362	14.5393	17.5377
chr1	54886874	54888001	+	ENSG00000242396	RP11-67L3.5	antisense	lncRNA	stage_specific	1.46472	1.09541	1.28007	3.32239	2.75566	3.03903	0.164879	0.157208	0.161044	0.194873	0.133098	0.163986	0.448508	0.162764	0.305636
chr1	54887562	54888850	+	ENSG00000233203	RP11-67L3.4	antisense	lncRNA	never	0.229882	0.393761	0.311821	0.471512	0.0997363	0.285624	0.156647	1.05e-180	0.0783235	0	0.125081	0.0625405	0	0.23741	0.118705
chr1	54980791	54992293	+	ENSG00000143001	TMEM61	protein_coding	coding	never	0.0806949	0.146498	0.113596	0.367512	0.344438	0.355975	0.0169055	0.0429841	0.0299448	0.132597	0.150349	0.141473	0.169798	0.144636	0.157217
chr1	54980949	54992274	-	ENSG00000233271	RP11-12C17.2	antisense	lncRNA	never	0	0	0	0.0463397	0.176435	0.111387	0	0	0	1.47e-05	1.44e-05	1.45e-05	0	0	0
chr1	54998932	55010883	+	ENSG00000162399	BSND	protein_coding	coding	never	0.0438109	0.124608	0.0842095	0.0706028	0.0350629	0.0528329	0	0	0	0.00719917	0.00874602	0.0079726	0	0	0
chr1	55039547	55064852	+	ENSG00000169174	PCSK9	protein_coding	coding	stage_specific	18.1791	48.5058	33.3424	27.5618	25.8288	26.6953	5.35684	2.55928	3.95806	0.663501	0.227541	0.445521	1.85684	1.11803	1.48744
chr1	55066358	55215113	-	ENSG00000162402	USP24	protein_coding	coding	constitutive	16.5578	18.4088	17.4833	20.4072	25.6935	23.0504	20.5265	19.6032	20.0648	18.4435	17.5564	17.9999	18.0069	19.7527	18.8798
chr1	55217860	55234177	+	ENSG00000231090	RP11-101C11.1	lincRNA	lncRNA	never	0	0	0	0	0	0	0	0	0	0	0	0	0	0	0
chr1	55222378	55223372	+	ENSG00000231095	GYG1P3	processed_pseudogene	other	never	0	0.00552651	0.00276326	0	0.024363	0.0121815	0	0.0486461	0.024323	0	0.00607706	0.00303853	0.00800684	0.0125914	0.0102991
chr1	55225640	55225723	+	ENSG00000265822	MIR4422	miRNA	other	never	0	0	0	0	0	0	0	0	0	0	0	0	0	0	0
chr1	55367465	55368774	+	ENSG00000231900	GOT2P1	processed_pseudogene	other	never	0	0	0	0	0	0	0	0	0	0	0	0	0	0	0
chr1	55372709	55373316	-	ENSG00000232198	MTCO2P34	processed_pseudogene	other	never	0	0	0	0	0	0	0	0	0	0	0	0	0	0	0
chr1	55376525	55376852	-	ENSG00000199831	RN7SKP291	misc_RNA	other	never	0	0	0	0	0	0	0	0	0	0	0	0	0	0	0
chr1	55398513	55398620	+	ENSG00000252162	RNU6-830P	snRNA	other	never	0	0	0	0	0	0	0	0	0	0	0	0	0	0	0
chr1	55484870	55484972	-	ENSG00000272051	Y_RNA	misc_RNA	other	never	0	0	0	0	0	0	0	0	0	0	0	0	0	0	0
chr1	55581036	55868248	+	ENSG00000234810	RP11-90C4.1	lincRNA	lncRNA	never	0	0	0	0.00259859	0	0.0012993	0	0.000411572	0.000205786	0	0	0	0	0	0
chr1	55915606	55944974	-	ENSG00000230250	RP11-90C4.2	lincRNA	lncRNA	never	0	0	0	0	0	0	0	0	0	0	0	0	0	0	0
chr1	55938713	55939280	-	ENSG00000227104	PIGQP1	transcribed_unprocessed_pseudogene	other	never	0	0	0	0	0	0	0	0	0	0	0	0	0	0	0
chr1	55945086	55950119	+	ENSG00000233079	RP11-90C4.3	lincRNA	lncRNA	never	0	0	0	0	0	0	0	0	0	0	0	0	0	0	0
chr1	56145720	56155224	+	ENSG00000235612	RP1-158P9.1	lincRNA	lncRNA	never	0	0	0	0	0	0	0	0	0	0	0	0	0	0	0
chr1	56207566	56208456	-	ENSG00000229871	RPSAP20	processed_pseudogene	other	never	0	0.0127486	0.0063743	0	0	0	0.0441347	0.0420815	0.0431081	0	0	0	0	0.0145229	0.00726145
chr1	56248293	56258571	-	ENSG00000260971	RP11-504A18.1	lincRNA	lncRNA	never	0.0139331	0.015177	0.014555	0.0175724	0.0167265	0.0171495	0.0919475	0.0834952	0.0877214	0.0206058	0.0667555	0.0436807	0	0.0259339	0.0129669
chr1	56414962	56415966	+	ENSG00000223956	RP4-710M16.2	lincRNA	lncRNA	stage_specific	0	0	0	0.153803	0	0.0769015	6.30449	3.93099	5.11774	1.16242	0.513809	0.838114	3.62954	4.3808	4.00517
chr1	56494746	56645301	-	ENSG00000162407	PLPP3	protein_coding	coding	constitutive	9.92962	9.29368	9.61165	3.17662	3.20197	3.18929	44.2697	34.8909	39.5803	10.9433	9.47385	10.2086	10.7083	9.96644	10.3374
chr1	56538451	56538911	+	ENSG00000236776	RPL21P23	processed_pseudogene	other	never	0	0	0	0	0	0	0	0	0	0.0946538	0.114992	0.104823	0	0	0
chr1	56585611	56586242	-	ENSG00000224980	RPL23AP85	processed_pseudogene	other	never	0	0	0	0	0	0	0	0	0	0	0.0430144	0.0215072	0	0	0
chr1	56619408	56619549	-	ENSG00000225475	RP11-377K22.2	processed_pseudogene	other	never	0	0	0	0	1.24232	0.62116	0	0	0	0	0	0	0	0	0
chr1	56645321	56715335	+	ENSG00000162409	PRKAA2	protein_coding	coding	stage_specific	0.785203	1.47596	1.13058	0.779971	0.3441	0.562036	1.43464	2.32355	1.87909	1.75215	2.48965	2.1209	1.20901	1.92389	1.56645
chr1	56718803	56819696	-	ENSG00000187889	C1orf168	protein_coding	coding	stage_specific	0.119897	0.0561818	0.0880394	1.11983	0.418091	0.768961	1.7054	2.04545	1.87542	2.4256	4.09487	3.26024	2.54355	3.56641	3.05498
chr1	56823678	56826920	-	ENSG00000229913	RP11-378I13.1	antisense	lncRNA	never	0	0	0	0	0	0	0	0	0	0	0	0	0	0	0
chr1	56854805	56918221	+	ENSG00000157131	C8A	protein_coding	coding	never	0	0	0	0	0	0	0	0.00443558	0.00221779	0	0	0	0.064246	0.114809	0.0895275
chr1	56929209	56966140	-	ENSG00000021852	C8B	protein_coding	coding	never	0	0	0	0.00548346	0.010439	0.00796123	0.0452053	0	0.0226026	0.0128601	0	0.00643005	0.0205844	0.0238446	0.0222145
chr1	56994777	58546734	-	ENSG00000173406	DAB1	protein_coding	coding	constitutive	5.23411	8.0501	6.6421	11.372	11.8391	11.6055	4.03301	2.7843	3.40865	3.20278	3.17714	3.18996	4.1978	4.8076	4.5027
chr1	58415383	58546802	-	ENSG00000162600	OMA1	protein_coding	coding	constitutive	16.6659	11.8914	14.2787	6.80471	10.1393	8.472	20.9344	22.9197	21.9271	19.88	21.5121	20.696	11.2069	13.6207	12.4138
chr1	56963885	56996757	+	ENSG00000236341	RP5-1103B4.3	antisense	lncRNA	never	0	0	0	0.0251467	0.0478723	0.0365095	0	0.0238969	0.0119484	2.26e-253	0	1.13e-253	0	0	0
chr1	57386575	57387450	+	ENSG00000227935	RP6-102O10.1	lincRNA	lncRNA	never	0	0	0	0	0	0	0	0	0	0	0.0574894	0.0287447	0	0	0
chr1	57605846	57606206	-	ENSG00000236888	RPS20P5	processed_pseudogene	other	never	0	0.0581953	0.0290976	0.0673806	0	0.0336903	0	0	0	0	0	0	0	0.0662947	0.0331473
chr1	57860531	57880905	+	ENSG00000226759	DAB1-AS1	antisense	lncRNA	never	0	0	0	0	0	0	0	0	0	0.0525092	0.0558742	0.0541917	0	0	0
chr1	58047888	58049335	-	ENSG00000229887	HNRNPA1P6	transcribed_unprocessed_pseudogene	other	stage_specific	1.42326	1.19517	1.30922	0.862454	1.28415	1.0733	2.49306	2.47524	2.48415	1.34425	0.798079	1.07116	1.18064	1.00812	1.09438
chr1	58056132	58056480	-	ENSG00000223416	RPS26P15	processed_pseudogene	other	constitutive	96.9676	62.1771	79.5724	57.08	91.3782	74.2291	74.6936	61.8826	68.2881	77.95	35.9475	56.9487	67.3517	37.7221	52.5369
chr1	58060138	58080274	+	ENSG00000235038	RP11-393I23.4	lincRNA	lncRNA	never	0	0.0211863	0.0105932	0	0	0	0	0	0	0	0.0232969	0.0116484	0	0	0
chr1	58084418	58084559	+	ENSG00000230546	RP11-393I23.3	unprocessed_pseudogene	other	never	0	0	0	0	0	0	0	0	0	0	0	0	0	0	0
chr1	58228681	58229003	-	ENSG00000233216	RP11-414C16.1	processed_pseudogene	other	never	0	0.0771044	0.0385522	0	0	0	0	0	0	0	0	0	0	0	0
chr1	58552912	58553333	-	ENSG00000270209	RP4-592A1.4	processed_pseudogene	other	never	0	0.0413618	0.0206809	0	0	0	0	0	0	0	0.0454822	0.0227411	0	0	0
chr1	58565630	58565932	-	ENSG00000264128	RN7SL713P	misc_RNA	other	never	0	0	0	0	0	0	0	0	0	0	0	0	0	0	0
chr1	58575422	58577773	-	ENSG00000184292	TACSTD2	protein_coding	coding	stage_specific	0.764165	0.79602	0.780092	0.0514633	0.017813	0.0346381	23.34	16.4233	19.8817	4.64123	2.47489	3.55806	26.9001	15.8714	21.3858
chr1	58630840	58631530	-	ENSG00000185839	RP4-592A1.2	processed_pseudogene	other	constitutive	6.23656	5.49735	5.86695	3.39189	4.16529	3.77859	3.85532	3.6743	3.76481	3.37179	2.3199	2.84585	3.24871	3.59645	3.42258
chr1	58654738	58700092	-	ENSG00000162601	MYSM1	protein_coding	coding	constitutive	34.9662	45.8987	40.4325	28.1467	24.9884	26.5676	17.2133	23.5221	20.3677	18.4171	17.3656	17.8913	11.0562	14.5383	12.7973
chr1	58715608	58771295	+	ENSG00000283445	RP11-63G10.4	lincRNA	lncRNA	never	0.00322712	0.00115425	0.00219068	0.00167054	0.000954073	0.00131231	0.0059939	0.0107256	0.00835975	0.00385756	0.00933647	0.00659702	0.070704	0.014053	0.0423785
chr1	58780787	58784327	-	ENSG00000177606	JUN	protein_coding	coding	stage_specific	20.1894	20.67	20.4297	1.81621	2.54736	2.18179	0.472017	0.13716	0.304588	20.4228	19.128	19.7754	11.3631	8.99977	10.1814
chr1	58785159	58899594	+	ENSG00000234807	LINC01135	lincRNA	lncRNA	never	0	0	0	0	0	0	0	0	0	0.0299369	0.0242462	0.0270915	0	0.0125592	0.0062796
chr1	58812807	58813342	-	ENSG00000272226	RP11-63G10.3	lincRNA	lncRNA	never	0.0491385	0	0.0245693	0	0	0	0	0	0	0.145343	0	0.0726715	0.0387739	0	0.019387
chr1	58838447	58851254	-	ENSG00000231740	RP11-63G10.2	lincRNA	lncRNA	never	0	0	0	0	0	0	0	0	0	0	0	0	0	0	0
chr1	58882867	58903747	-	ENSG00000232453	RP4-794H19.1	lincRNA	lncRNA	never	0.036273	0.134144	0.0852085	0.158916	0.0361509	0.0975334	0.0149736	0.0190377	0.0170057	0.222705	0.234462	0.228583	0.0858405	0.0785983	0.0822194
chr1	58933642	59240555	+	ENSG00000237352	LINC01358	lincRNA	lncRNA	never	0	0.00638831	0.00319416	0.00554746	0	0.00277373	0.00414672	0.00395381	0.00405026	0.0216836	0.0643593	0.0430215	0.0117015	0.00363871	0.0076701
chr1	59131935	59208121	-	ENSG00000224609	HSD52	processed_transcript	lncRNA	never	0.0176529	0.0457247	0.0316888	0	0	0	0	0	0	0	0.102169	0.0510845	0.0139295	0.0123389	0.0131342
chr1	58999675	59000494	+	ENSG00000228121	PHBP3	processed_pseudogene	other	never	0	0.00949329	0.00474664	0	0	0	0	0.015668	0.007834	0	0.020878	0.010439	0	0	0
chr1	59054396	59056049	-	ENSG00000241042	RP11-145M4.1	lincRNA	lncRNA	es_restricted	5.86939	3.99586	4.93262	0	0	0	0	0	0	0	0	0	0	0	0
chr1	59055998	59078116	-	ENSG00000235215	RP11-145M4.2	lincRNA	lncRNA	never	0.443077	0.965265	0.704171	0	0	0	0	0	0	0	0	0	0	0	0
chr1	59289302	59289640	-	ENSG00000270457	RP11-467C18.1	lincRNA	lncRNA	never	0.124733	0.0679345	0.0963337	0	0	0	0	0	0	0.36894	0.448212	0.408576	0.0984238	0	0.0492119
chr1	59296637	59810647	+	ENSG00000172456	FGGY	protein_coding	coding	constitutive	14.5314	8.02992	11.2807	5.2934	5.44409	5.36874	5.65234	5.44625	5.54929	18.6139	12.1141	15.364	7.76524	7.7629	7.76407
chr1	59754746	59789182	-	ENSG00000226883	RP4-782L23.2	antisense	lncRNA	never	0	0	0	0	0	0	0	0	0	0.0422905	0.068503	0.0553968	0	0.0177418	0.0088709
chr1	59733226	59733296	-	ENSG00000266150	MIR4711	miRNA	other	never	0	0	0	0	0	0	0	0	0	0	0	0	0	0	0
chr1	59814785	59876378	+	ENSG00000134709	HOOK1	protein_coding	coding	constitutive	16.6034	11.6098	14.1066	2.38389	3.38632	2.8851	7.14745	6.78611	6.96678	10.596	5.43735	8.01667	6.11932	8.45455	7.28693
chr1	59893307	59926790	-	ENSG00000134716	CYP2J2	protein_coding	coding	never	0.825253	0.727206	0.77623	0.142626	0.1471	0.144863	0.165523	0.202319	0.183921	0.317817	0.200445	0.259131	0.166325	0.291564	0.228944
chr1	59974756	59975054	-	ENSG00000265535	RN7SL475P	misc_RNA	other	never	0	0	0	0	0	0	0	0	0	0	0	0	0	0	0
chr1	59987268	60073770	-	ENSG00000162598	C1orf87	protein_coding	coding	never	0.110018	0.0295567	0.0697873	0	0.0514554	0.0257277	0	0.0173718	0.0086859	0.0823623	0	0.0411811	0.00689548	0.0304846	0.01869
chr1	60097414	60097976	+	ENSG00000229332	PGBD4P8	processed_pseudogene	other	never	0	0	0	0	0	0	0	0	0	0	0	0	0	0	0
chr1	60114874	60149679	+	ENSG00000238242	RP11-575B7.3	lincRNA	lncRNA	never	0	0	0	0	0	0	0	0	0	0	0	0	0	0	0
chr1	60515715	60640491	-	ENSG00000226476	RP11-776H12.1	lincRNA	lncRNA	never	0.199761	0.317378	0.25857	0.045776	0.0239953	0.0348856	0.156615	0.139583	0.148099	0.0608419	0.025198	0.04302	0.0635036	0.0130742	0.0382889
chr1	60659630	60867998	-	ENSG00000231252	RP11-436K8.1	lincRNA	lncRNA	never	0.00881615	0.00960323	0.00920969	0	0	0	0	0	0	0	0.00445783	0.00222892	0	0	0
chr1	60865258	61462793	+	ENSG00000162599	NFIA	protein_coding	coding	never	0.603047	1.04264	0.822843	0.120651	0.107212	0.113932	0.637592	0.844968	0.74128	0.119609	0.125615	0.122612	0.406097	0.598704	0.502401
chr1	60940238	60970776	-	ENSG00000237928	NFIA-AS2	antisense	lncRNA	never	0.0363179	0	0.018159	0	0	0	0	0	0	0.0220791	0	0.0110396	0.0286575	0.0092627	0.0189601
chr1	61124732	61125202	+	ENSG00000270742	RP4-802A10.1	sense_intronic	lncRNA	never	0.061521	0.0335066	0.0475138	0	0	0	0	0	0	0	0.0368445	0.0184223	0	0	0
chr1	61248944	61253510	-	ENSG00000237853	NFIA-AS1	processed_transcript	lncRNA	never	0	0	0	0	0	0	0	0	0	0	0	0	0	0	0
chr1	61654193	61654908	+	ENSG00000223920	RP11-430G17.1	processed_pseudogene	other	never	0	0	0	0	0	0	0	0	0	0.0933259	0.0944821	0.093904	0	0	0
chr1	61681045	61725423	-	ENSG00000162604	TM2D1	protein_coding	coding	constitutive	16.7763	14.4818	15.629	17.0713	23.4394	20.2553	19.8628	15.2062	17.5345	23.8435	17.1462	20.4948	20.847	18.0491	19.448
chr1	61741997	61742424	-	ENSG00000271200	RP11-430G17.3	lincRNA	lncRNA	pp2_restricted	0.590612	0.281461	0.436036	0.232775	0.177255	0.205015	0.626397	0.442412	0.534404	0.655098	0.795856	0.725477	1.04858	1.09932	1.07395
chr1	61742476	62178675	+	ENSG00000132849	PATJ	protein_coding	coding	constitutive	10.5139	14.2829	12.3984	16.6917	12.0064	14.3491	12.3834	16.4549	14.4192	12.9461	17.0794	15.0128	14.8499	21.3049	18.0774
chr1	61816418	61816522	+	ENSG00000200575	RNU6-414P	snRNA	other	never	0	0	0	0	0	0	0	0	0	0	0	0	0	0	0
chr1	61852498	61852602	+	ENSG00000212360	RNU6-1177P	snRNA	other	never	0	0	0	0	0	0	0	0	0	0	34.5526	17.2763	0	0	0
chr1	62038841	62039111	+	ENSG00000236646	LAMTOR5P1	processed_pseudogene	other	never	0.119048	0.259351	0.189199	0.150143	0.428745	0.289444	0.448927	0.856084	0.652505	0	1.28334	0.64167	0.37575	1.47724	0.926495
chr1	62072447	62072741	+	ENSG00000242860	RN7SL180P	misc_RNA	other	never	0	0.298946	0.149473	0.230754	0.219645	0.225199	0.86244	1.09642	0.97943	0.270587	2.30109	1.28584	0.86623	2.15683	1.51153
chr1	62078785	62078859	+	ENSG00000263908	MIR3116-1	miRNA	other	never	0	0	0	0	0	0	0	0	0	0	0	0	0	0	0
chr1	62078788	62078856	-	ENSG00000283690	MIR3116-2	miRNA	other	never	0	0	0	0	0	0	0	0	0	0	0	0	0	0	0
chr1	62189130	62189953	+	ENSG00000234204	PIGPP2	processed_pseudogene	other	never	0	0	0	0	0	0	0	0	0	0	0	0	0	0	0
chr1	62190521	62190926	+	ENSG00000234088	RPS15AP7	processed_pseudogene	other	never	0	0	0	0	0	0	0	0	0	0	0	0	0	0	0
chr1	62194830	62212328	+	ENSG00000240563	L1TD1	protein_coding	coding	stage_specific	142.645	120.621	131.633	82.7081	84.1744	83.4412	5.02926	6.45534	5.7423	1.36931	0.878286	1.1238	2.52311	3.27776	2.90043
chr1	62211556	62211666	-	ENSG00000200174	Y_RNA	misc_RNA	other	never	4.42e-05	6.4e-05	5.41e-05	0.00013759	0.000159368	0.000148479	5.47266	0.000262639	2.73646	0	1.57841	0.789205	0	0.0548566	0.0274283
chr1	62208135	62208442	-	ENSG00000237227	RP5-1155K23.4	processed_pseudogene	other	never	0.161442	0.0879271	0.124685	0.407221	0	0.20361	0	0	0	0	0	0	0	0	0
chr1	62236978	62319414	-	ENSG00000132854	KANK4	protein_coding	coding	pp2_restricted	0.0335183	0.0920104	0.0627643	0.535946	0.390417	0.463182	0.166468	0.130355	0.148412	0.168928	0.156797	0.162862	2.35716	1.81564	2.0864
chr1	62298148	62298256	-	ENSG00000201153	RNU6-371P	snRNA	other	never	0	0	0	0	0	0	0	0	0	0	0	0	0	0	0
chr1	62436296	62451804	+	ENSG00000162607	USP1	protein_coding	coding	constitutive	12.9308	11.2985	12.1146	7.93833	8.15943	8.04888	10.1849	14.6692	12.427	6.46083	7.5035	6.98217	10.5538	14.488	12.5209
chr1	62454297	62688368	-	ENSG00000116641	DOCK7	protein_coding	coding	constitutive	103.544	40.3945	71.9693	37.9013	81.9338	59.9175	53.9593	49.7735	51.8664	42.8464	34.0281	38.4372	61.6911	43.0799	52.3855
chr1	62597486	62606159	+	ENSG00000132855	ANGPTL3	protein_coding	coding	never	0	0	0	0	0	0	0.00576967	0	0.00288484	0.043546	0.131789	0.0876675	0.147345	0.0410513	0.0941981
chr1	62530635	62530873	+	ENSG00000270549	RP11-293K19.1	processed_pseudogene	other	never	0	0	0	0	0	0	0	0	0	0	0.439462	0.219731	0	0	0
chr1	62607765	62609584	+	ENSG00000278967	RP5-849H19.3	TEC	lncRNA	never	0	0	0	0	0	0	0	0	0	0.043814	0.0413996	0.0426068	0	0.00612699	0.00306349
chr1	62641121	62641667	-	ENSG00000213703	RP5-849H19.2	processed_pseudogene	other	never	0.0475199	0.0517622	0.049641	0.14983	0.057047	0.103439	0	0.398674	0.199337	0.210833	0.45535	0.333091	0.149987	0.117933	0.13396
chr1	62688481	62710694	+	ENSG00000235545	RP11-230B22.1	antisense	lncRNA	never	0.0937197	0.297752	0.195736	0.423548	0.262521	0.343035	0.397593	0.599065	0.498329	0.369609	0.851277	0.610443	0.345108	0.765606	0.555357
chr1	62784134	62865513	+	ENSG00000125703	ATG4C	protein_coding	coding	constitutive	5.23393	5.43372	5.33383	5.29947	6.2523	5.77588	3.38311	4.64895	4.01603	3.31601	2.17614	2.74607	1.85607	2.22195	2.03901
chr1	62896008	62901639	+	ENSG00000234318	RP4-771M4.3	lincRNA	lncRNA	never	0.135087	0.0367868	0.0859369	0.0425931	0.243256	0.142925	0	0	0	0	0.0404515	0.0202258	0.0532969	0.0419067	0.0476018
chr1	62905179	62905482	+	ENSG00000237163	RP4-771M4.2	processed_pseudogene	other	never	0	0	0	0	0	0	0	0	0	0	0.100363	0.0501815	0	0	0
chr1	63000496	63012471	-	ENSG00000229537	RP11-5P4.1	lincRNA	lncRNA	never	0	0	0	0	0	0	0	0	0	0	0	0	0	0	0
chr1	63024206	63025658	+	ENSG00000227485	RP11-5P4.2	lincRNA	lncRNA	never	0	0	0	0	0	0	0	0	0	0	0	0	0	0	0
chr1	63078080	63079031	-	ENSG00000229225	RP11-5P4.3	lincRNA	lncRNA	never	0	0	0	0	0	0	0	0	0	0	0	0	0	0	0
chr1	63139249	63163153	+	ENSG00000203605	RP11-335E6.2	lincRNA	lncRNA	never	0	0	0	0	0	0	0	0	0	0	0.00777799	0.003889	0	0	0
chr1	63262112	63262707	+	ENSG00000223683	RPSAP65	processed_pseudogene	other	never	0	0	0	0	0	0	0	0	0	0	0	0	0	0	0
chr1	63159086	63317274	-	ENSG00000224209	LINC00466	processed_transcript	lncRNA	never	0.091238	0.0678945	0.0795663	0.0124462	0.0332502	0.0228482	0	0	0	0	0	0	0	0	0
chr1	63186335	63186450	-	ENSG00000252259	RNA5SP49	rRNA	other	never	0	0	0	0	0	0	0	0	0	0	0	0	0	0	0
chr1	63249919	63251771	+	ENSG00000228734	RP11-335E6.3	lincRNA	lncRNA	never	0	0	0	0	0	0	0	0	0	0	0	0	0	0	0
chr1	63320883	63324441	-	ENSG00000230798	FOXD3-AS1	antisense	lncRNA	stage_specific	180.225	135.452	157.839	4.60252	5.04626	4.82439	0.0579915	0	0.0289958	0	0	0	0	0.0352964	0.0176482
chr1	63323040	63325126	+	ENSG00000187140	FOXD3	protein_coding	coding	es_restricted	15.861	8.99286	12.4269	0.760961	0.30498	0.532971	0	0	0	0	0	0	0	0.00525402	0.00262701
chr1	63326924	63326984	-	ENSG00000275836	MIR6068	miRNA	other	never	0	0	0	0	0	0	0	0	0	0	0	0	0	0	0
chr1	63338262	63338372	-	ENSG00000252784	Y_RNA	misc_RNA	other	never	0	0	0	0	0	0	0	0	0	0	0	0	0	0	0
chr1	63359822	63361179	-	ENSG00000236674	RP4-792G4.3	processed_pseudogene	other	never	0.0138601	0	0.00693005	0	0.0166388	0.0083194	0	0	0	0	0.0083007	0.00415035	0	0	0
chr1	63367589	63438562	+	ENSG00000088035	ALG6	protein_coding	coding	constitutive	7.97555	9.17295	8.57425	5.2127	4.25111	4.73191	4.77511	6.10177	5.43844	5.57541	5.18809	5.38175	3.23078	5.29287	4.26182
chr1	63440769	63593721	-	ENSG00000142856	ITGB3BP	protein_coding	coding	constitutive	15.9975	17.522	16.7598	11.5905	10.8768	11.2337	20.3046	26.1908	23.2477	17.4655	20.9054	19.1854	14.9051	20.2218	17.5634
chr1	63548976	63549112	-	ENSG00000276884	DLEU2_6	misc_RNA	other	pp1_restricted	0	0	0	0	0	0	0	0	0	4.29335	2.13701	3.21518	0	0	0
chr1	63549132	63549216	-	ENSG00000278287	DLEU2_5	misc_RNA	other	never	0	0	0	0	0	0	0	0	0	0	0	0	0	0	0
chr1	63549226	63549284	-	ENSG00000277565	DLEU2_4	misc_RNA	other	never	0	0	0	0	0	0	0	0	0	0	0	0	0	0	0
chr1	63549293	63549366	-	ENSG00000275823	DLEU2_3	misc_RNA	other	never	0	0	0	0	0	0	0	0	0	0	0	0	0	0	0
chr1	63549373	63549463	-	ENSG00000277689	DLEU2_2	misc_RNA	other	never	0	0	0	0	0	0	0	0	0	0	0	0	0	0	0
chr1	63549488	63549608	-	ENSG00000274199	DLEU2_1	misc_RNA	other	never	0	0	0	0	0	0	0	0	0	0	8.97e-25	4.49e-25	0	0	0
chr1	63523371	63572693	+	ENSG00000203965	EFCAB7	protein_coding	coding	constitutive	1.22414	1.62888	1.42651	1.50435	2.09585	1.8001	2.77006	4.38719	3.57863	8.285	9.17033	8.72767	4.83807	7.5093	6.17368
chr1	63547081	63550636	+	ENSG00000116652	DLEU2L	sense_intronic	lncRNA	never	0.0522172	0.105332	0.0787746	0.0692892	0.0341923	0.0517408	0.115666	0.19745	0.156558	0.322516	0.704762	0.513639	0.301407	0.354342	0.327875
chr1	63593275	63660245	+	ENSG00000079739	PGM1	protein_coding	coding	constitutive	28.8788	45.7872	37.333	72.643	71.1204	71.8817	21.8562	14.3399	18.0981	9.65273	6.45108	8.0519	12.4529	9.78355	11.1182
chr1	63529612	63529898	-	ENSG00000264271	RN7SL488P	misc_RNA	other	never	0	0	0	0	0	0	0	0	0	0	0.119038	0.059519	0	0.0411069	0.0205535
chr1	63536710	63536770	-	ENSG00000251720	RNU7-123P	snRNA	other	never	0	0	0	0	0	0	0	0	0	0	0	0	0	0	0
chr1	63655742	63656047	+	ENSG00000244256	RN7SL130P	misc_RNA	other	never	0.657847	0.985291	0.821569	2.59274	0.789735	1.69124	0.620182	0.492775	0.556478	0.972898	0.098495	0.535697	1.29772	0.816306	1.05701
chr1	63774021	64181498	+	ENSG00000185483	ROR1	protein_coding	coding	constitutive	18.2463	17.3215	17.7839	10.4482	13.9864	12.2173	26.8398	30.9833	28.9115	5.70086	7.2069	6.45388	17.854	22.2617	20.0578
chr1	63788720	63789304	-	ENSG00000177452	RP4-597J3.1	processed_pseudogene	other	never	0	0	0	0	0	0	0	0.0340898	0.0170449	0.189293	0.485484	0.337388	0	0	0
chr1	63843195	63843685	-	ENSG00000228056	CFL1P3	processed_pseudogene	other	never	0.0285471	0.108835	0.0686911	0.0900091	0.0342704	0.0621398	0.0807379	0	0.040369	0.0422187	0.30774	0.174979	0.0675772	0.0826546	0.0751159
chr1	64028893	64029000	-	ENSG00000207190	RNU6-809P	snRNA	other	never	0	0	0	0	0	0	0	0	0	0	0	0	0	0	0
chr1	64066639	64066741	-	ENSG00000200508	Y_RNA	misc_RNA	other	never	0	0	0	0	0	0	0	0	0	0	0	0	0	0	0
chr1	64094441	64171297	-	ENSG00000223949	ROR1-AS1	antisense	lncRNA	never	0	0.0126919	0.00634595	0	0	0	0	0	0	0.0689276	0.341355	0.205141	0	0	0
chr1	64203626	64267368	+	ENSG00000177414	UBE2U	protein_coding	coding	never	0	0	0	0	0	0	0	0.0603776	0.0301888	0	0	0	0	0.0424485	0.0212243
chr1	64384397	64384459	-	ENSG00000238653	RNU7-62P	snRNA	other	never	0	0	0	0	0	0	0	0	0	0	0	0	0	0	0
chr1	64470791	64693058	+	ENSG00000158966	CACHD1	protein_coding	coding	constitutive	17.0413	13.5825	15.3119	11.1592	12.7656	11.9624	6.17287	5.83468	6.00378	7.24244	5.34381	6.29312	5.33965	4.69255	5.0161
chr1	64579846	64579923	+	ENSG00000264470	MIR4794	miRNA	other	never	0	0	0	0	0	0	0	0	0	0	0	0	0	0	0
chr1	64745094	64833232	+	ENSG00000162437	RAVER2	protein_coding	coding	constitutive	6.12998	5.79703	5.9635	4.8842	4.93176	4.90798	6.73536	7.06483	6.9001	6.03211	4.99384	5.51297	6.09572	7.16393	6.62983
chr1	64833228	64966504	-	ENSG00000162434	JAK1	protein_coding	coding	constitutive	8.00383	8.19752	8.10068	6.90827	5.09465	6.00146	3.43827	2.35046	2.89437	7.39806	8.59063	7.99435	12.357	13.387	12.872
chr1	64918442	64918683	+	ENSG00000234784	RP11-182I10.1	processed_pseudogene	other	never	0	0	0	0	0	0	0	0	0	0	0	0	0	0	0
chr1	64941978	64942365	+	ENSG00000233877	RP11-182I10.2	processed_pseudogene	other	never	0	0	0	0	0	0	0	0	0	0.134022	0.162819	0.148421	0	0	0
chr1	64972224	65002489	-	ENSG00000226891	LINC01359	processed_transcript	lncRNA	never	0.0121606	0.398809	0.205485	0.34335	0.0493579	0.196354	0.0682476	0.24353	0.155889	0.204086	0.277793	0.24094	0.156697	0.0719274	0.114312
chr1	64984607	64986087	-	ENSG00000185031	SLC2A3P2	processed_pseudogene	other	never	0.0250311	0.0920218	0.0585265	0.0762923	0.020033	0.0481627	0.0393299	0.140001	0.0896654	0.0185094	0.0424744	0.0304919	0.0263351	0.0232954	0.0248153
chr1	65003469	65004087	-	ENSG00000272506	RP4-535B20.4	lincRNA	lncRNA	never	0	0.0425815	0.0212908	0.0986047	0	0.0493024	0.0737068	0.187408	0.130557	0.115626	0.0702351	0.0929306	0	0.0242539	0.0121269
chr1	65022967	65023074	-	ENSG00000212257	RNU6-1176P	snRNA	other	never	0	0	0	0	0	0	0	0	0	0	0	0	0	0	0
chr1	65057754	65057842	-	ENSG00000265996	MIR3671	miRNA	other	never	0	0	0	0	0	0	0	0	0	0	0	0	0	0	0
chr1	65058433	65058508	-	ENSG00000199135	MIR101-1	miRNA	other	never	0	0	0	0	0	0	0	0	0	0	0	0	0	0	0
chr1	65066626	65067737	-	ENSG00000231485	RP4-535B20.1	lincRNA	lncRNA	never	0.628354	0.855563	0.741958	0.0990602	0	0.0495301	0	0.0941366	0.0470683	0.23232	0.188159	0.210239	0.123954	0	0.061977
chr1	65077412	65078131	-	ENSG00000235804	RP4-535B20.2	processed_pseudogene	other	never	0	0	0	0	0	0	0	0	0	0	0	0	0	0	0
chr1	65092391	65092614	-	ENSG00000234496	MRPS21P1	processed_pseudogene	other	never	0	0	0	0	0	0	0	0	0	0	0	0	0	0	0
chr1	65147548	65232145	+	ENSG00000162433	AK4	protein_coding	coding	constitutive	55.2154	33.6724	44.4439	24.245	33.836	29.0405	9.74132	8.62144	9.18138	11.2888	6.79937	9.04409	1.64728	1.10449	1.37589
chr1	65154479	65154650	+	ENSG00000231622	RPS29P7	processed_pseudogene	other	es_restricted	1.46735	1.59834	1.53285	0.92531	0	0.462655	0	0	0	0	0	0	0	0	0
chr1	65248218	65415869	+	ENSG00000116675	DNAJC6	protein_coding	coding	stage_specific	0.63463	1.13212	0.883375	4.07451	3.66901	3.87176	6.20974	5.06786	5.6388	1.90915	1.23893	1.57404	2.27956	2.72609	2.50283
chr1	65415815	65416006	+	ENSG00000222624	RNU2-15P	snRNA	other	never	0	0	0	0	0	0	0	0	0	0	0	0	0	0	0
chr1	65279455	65306521	-	ENSG00000229294	RP5-1044H5.1	antisense	lncRNA	never	0	0	0	0	0	0	0	0	0	0	0.0633707	0.0316854	0	0	0
chr1	65298754	65298980	-	ENSG00000234144	COX6CP13	processed_pseudogene	other	never	0	0	0	0	0	0	0	0	0	0	0	0	0	0.275828	0.137914
chr1	65420586	65436007	+	ENSG00000213625	LEPROT	protein_coding	coding	constitutive	11.2694	12.3361	11.8027	18.7696	19.0342	18.9019	19.2361	19.7746	19.5053	24.567	21.2686	22.9178	20.1669	24.0462	22.1065
chr1	65420651	65641559	+	ENSG00000116678	LEPR	protein_coding	coding	stage_specific	0.525688	1.25255	0.889119	1.84554	1.58414	1.71484	1.52073	1.7779	1.64932	1.75086	2.07979	1.91532	0.682356	1.21137	0.946863
chr1	65486405	65494188	+	ENSG00000237852	RP4-630A11.3	sense_intronic	lncRNA	never	0	0.0409702	0.0204851	0.189747	0.180613	0.18518	0.212754	0.0901582	0.151456	0.222502	0.225258	0.22388	0.0593579	0.0466723	0.0530151
chr1	65576128	65578380	-	ENSG00000224570	RP11-430H12.2	processed_pseudogene	other	never	0	0	0	0	0	0	0	0	0	0	0.0299816	0.0149908	0	0	0
chr1	65761057	65761352	-	ENSG00000239319	RN7SL854P	misc_RNA	other	never	0	0	0	0	0	0	0	0	0	0	0	0	0	0	0
chr1	65792513	66374579	+	ENSG00000184588	PDE4B	protein_coding	coding	es_restricted	2.44886	2.1952	2.32203	0.819555	1.02047	0.920013	0.139761	0.111428	0.125594	0.0474981	0.0417542	0.0446262	0.270378	0.977624	0.624001
chr1	66042499	66050718	-	ENSG00000227466	RP11-397C12.1	antisense	lncRNA	never	0	0	0	0	0	0	0	0	0	0	0	0	0	0	0
chr1	66094460	66094546	-	ENSG00000223152	RNU4-88P	snRNA	other	never	0	0	0	0	0	0	0	0	0	0	0	0	0	0	0
chr1	66533382	66748299	+	ENSG00000118473	SGIP1	protein_coding	coding	stage_specific	0.463452	0.494104	0.478778	0.509458	0.448543	0.479	17.1427	13.5036	15.3232	2.62103	1.63654	2.12879	5.18525	6.91319	6.04922
chr1	66665863	66677027	-	ENSG00000248458	RP4-598P13.1	antisense	lncRNA	never	0	0	0	0	0	0	0	0	0	0.0248626	0.0417112	0.0332869	0	0	0
chr1	66628439	66628517	+	ENSG00000264720	MIR3117	miRNA	other	never	0	0	0	0	0	0	0	0	0	0	0	0	0	0	0
chr1	66752458	66778787	+	ENSG00000152760	TCTEX1D1	protein_coding	coding	pp1_restricted	0.115394	0.759203	0.437298	0.188078	0.147512	0.167795	0.156661	0.31348	0.23507	5.62654	8.58192	7.10423	0.105817	0.107937	0.106877
chr1	66797740	66801256	-	ENSG00000172410	INSL5	protein_coding	coding	never	0	0	0	0	0	0	0	0	0	0.0933259	0.226757	0.160041	0.074691	0.0391524	0.0569217
chr1	66812884	66924887	-	ENSG00000152763	WDR78	protein_coding	coding	stage_specific	0.718226	0.260024	0.489125	1.77444	0.672661	1.22355	3.09231	3.10437	3.09834	12.5204	14.8716	13.696	3.27458	4.7827	4.02864
chr1	66826941	66828558	+	ENSG00000231080	RP11-342H21.2	antisense	lncRNA	never	0	0	0	0	0	0	0	0	0	6.5e-76	0.105145	0.0525725	0	0	0
chr1	66924894	66988619	+	ENSG00000198160	MIER1	protein_coding	coding	constitutive	10.4876	9.35746	9.92253	8.27527	8.13838	8.20683	7.10012	9.79364	8.44688	10.2341	8.93989	9.58699	8.92116	10.8303	9.87573
chr1	66999331	67054099	-	ENSG00000116704	SLC35D1	protein_coding	coding	stage_specific	1.04816	0.666741	0.857451	1.06294	1.09822	1.08058	1.56646	1.72294	1.6447	3.52234	4.87736	4.19985	3.48194	4.32058	3.90126
chr1	67092164	67231853	-	ENSG00000203963	C1orf141	protein_coding	coding	never	0	0.0164957	0.00824785	0	0	0	0	0.0181498	0.0090749	0.156627	0.199699	0.178163	0.0238987	0.0563743	0.0401365
chr1	67102644	67102779	-	ENSG00000252433	SNORA31	snoRNA	other	never	0	0	0	0	0	0	0	0	0	0	0	0	0	0	0
chr1	67121604	67123956	-	ENSG00000275678	RP4-547N15.3	sense_intronic	lncRNA	never	0	0	0	0	0	0	0.00699104	0.00888774	0.00793939	0.142572	0.19097	0.166771	0.0351088	0.0414084	0.0382586
chr1	67138906	67259979	+	ENSG00000162594	IL23R	protein_coding	coding	never	0	0.00692939	0.00346469	0.00923999	0	0.00462	0	0.00476448	0.00238224	0	0.0615198	0.0307599	0.0125538	0.0218809	0.0172173
chr1	67196139	67196243	+	ENSG00000253074	RNU6-586P	snRNA	other	never	0	0	0	0	0	0	0	0	0	0	0	0	0	0	0
chr1	67267600	67267726	-	ENSG00000252116	RNU4ATAC4P	snRNA	other	never	0	0	0	0	0	0	0	0	0	0	0	0	0	0	0
chr1	67278051	67278779	+	ENSG00000228523	RP11-131O15.2	processed_pseudogene	other	never	0	0	0	0	0	0	0	0	0	0	0	0	0	0.00636098	0.00318049
chr1	67307363	67396900	+	ENSG00000081985	IL12RB2	protein_coding	coding	never	0.411399	0.197524	0.304461	0.0426711	0.0395245	0.0410978	0.00837906	0.0442852	0.0263321	0.0197186	0.159506	0.0896123	0.00701323	0.0658379	0.0364256
chr1	67407809	67430415	-	ENSG00000142864	SERBP1	protein_coding	coding	constitutive	381.022	288.032	334.527	159.411	219.766	189.589	243.231	244.299	243.765	178.009	102.139	140.074	155.923	150.39	153.156
chr1	67417213	67417318	+	ENSG00000223263	RNU6-387P	snRNA	other	never	0	0	0	31.9236	0	15.9618	0	0	0	0	0	0	0	0	0
chr1	67522346	67532612	+	ENSG00000235200	RP11-393N21.2	lincRNA	lncRNA	never	0	0	0	0	0	0	0	0	0	0	0	0	0	0	0
chr1	67541126	67541233	+	ENSG00000207504	RNU6-1031P	snRNA	other	never	0	0	0	0	0	0	0	0	0	0	0	0	0	0	0
chr1	67561072	67561446	+	ENSG00000238139	RP11-393N21.1	processed_pseudogene	other	never	0	0	0	0	0	0	0	0	0	0	0	0	0	0	0
chr1	67656830	67657129	-	ENSG00000242482	RN7SL392P	misc_RNA	other	never	0	0	0	0	0	0	0	0	0	0	0	0	0	0	0
chr1	67660154	67661013	-	ENSG00000232048	HNRNPCP9	processed_pseudogene	other	never	0	0	0	0	0	0	0	0	0	0	0	0	0	0	0
chr1	67685060	67688338	+	ENSG00000116717	GADD45A	protein_coding	coding	constitutive	3.72577	4.40153	4.06365	17.5976	23.7088	20.6532	12.3314	8.71306	10.5222	24.1751	27.3176	25.7463	27.7692	22.4102	25.0897
chr1	67701465	67833467	-	ENSG00000172380	GNG12	protein_coding	coding	constitutive	8.34447	8.60431	8.47439	3.05381	2.24046	2.64714	1.69877	1.99179	1.84528	3.44945	5.23402	4.34173	3.16933	4.51113	3.84023
chr1	67772592	67772653	-	ENSG00000238778	RNU7-80P	snRNA	other	never	0	0	0	0	0	0	0	0	0	0	0	0	0	0	0
chr1	67832302	68202987	+	ENSG00000232284	GNG12-AS1	antisense	lncRNA	never	0.0235685	0.0342301	0.0288993	0	0	0	0	0	0	0.556782	0.649768	0.603275	0.0203503	0.021735	0.0210426
chr1	68098472	68233120	-	ENSG00000116729	WLS	protein_coding	coding	stage_specific	1.22466	0.866863	1.04576	9.52322	11.8712	10.6972	42.6212	39.4119	41.0166	103.399	95.9509	99.6749	87.6033	45.3436	66.4734
chr1	68043329	68044233	+	ENSG00000235055	RP4-609E1.2	processed_pseudogene	other	never	0	0	0	0	0	0	0	0	0	0	0.013735	0.0068675	0	0.0142291	0.00711455
chr1	68045961	68051631	-	ENSG00000162595	DIRAS3	protein_coding	coding	pp2_restricted	0.00901164	0.00490808	0.00695986	0.0397792	0.0216367	0.030708	0.161418	0.199811	0.180615	0.786319	0.917493	0.851906	1.35106	1.94573	1.6484
chr1	68049359	68049745	-	ENSG00000228431	ARL5AP3	processed_pseudogene	other	never	0	0.049637	0.0248185	0	0	0	0.257759	0.10923	0.183495	0.539139	0.6004	0.56977	0.143829	0	0.0719145
chr1	68161760	68163090	-	ENSG00000234383	CTBP2P8	processed_pseudogene	other	never	0.14668	0.313106	0.229893	0.162614	0.0426017	0.102608	0.267642	0.513217	0.390429	0.633285	1.36019	0.996738	0.739249	0.654654	0.696951
chr1	68183517	68183610	-	ENSG00000221203	MIR1262	miRNA	other	never	0	0	0	0	0	0	0	0	0	0	0	0	0	0	0
chr1	68242473	68243055	-	ENSG00000229133	RPS7P4	processed_pseudogene	other	never	0.139411	0.371854	0.255632	0.250213	0.188817	0.219515	0.465056	1.35254	0.908798	0.105732	0.642248	0.37399	0.188984	0.22622	0.207602
chr1	68282387	68282622	+	ENSG00000225242	COX6B1P7	processed_pseudogene	other	never	0	0	0	0	0	0	0	0	0	0	0	0	0	0	0
chr1	68375326	68375663	-	ENSG00000237622	TCEB1P18	processed_pseudogene	other	never	0	0	0	0	0	0	0	0	0	0	0	0	0	0	0
chr1	68381440	68381657	-	ENSG00000229440	RP5-1033K19.2	processed_pseudogene	other	never	0	0	0	0	0	0	0	0	0	0	0	0	0	0	0
chr1	68428821	68449959	-	ENSG00000116745	RPE65	protein_coding	coding	never	0	0	0	0	0	0	0	0	0	0	0	0	0	0.00821182	0.00410591
chr1	68474151	68497221	-	ENSG00000024526	DEPDC1	protein_coding	coding	constitutive	11.1481	9.59027	10.3692	4.67342	6.66211	5.66777	8.12785	15.0418	11.5848	3.49458	1.96763	2.7311	6.47188	8.09701	7.28444
chr1	68479128	68483539	+	ENSG00000233589	RP4-694A7.2	antisense	lncRNA	never	0.0212168	0.0231109	0.0221638	0.0133793	0	0.00668965	0	0.0254287	0.0127143	0.613271	0.265416	0.439343	0.0167416	0.0263275	0.0215345
chr1	68496675	68538627	+	ENSG00000234264	DEPDC1-AS1	antisense	lncRNA	never	0.107332	0.0250531	0.0661926	0.00966912	0	0.00483456	0.0289106	0.0183771	0.0236439	0	0.00918295	0.00459148	0.012099	0.0380532	0.0250761
chr1	68514374	68514669	-	ENSG00000225167	TXNP2	processed_pseudogene	other	never	0	0	0	0	0	0	0	0	0	0	0	0	0	0	0
chr1	69055897	69185003	+	ENSG00000223883	RP11-424D14.1	lincRNA	lncRNA	never	0	0	0	0	0	0	0	0	0	0	0	0	0	0	0
chr1	69243371	69249423	-	ENSG00000235446	RP11-74K19.1	lincRNA	lncRNA	never	0	0	0	0	0	0	0	0	0	0	0	0	0	0	0
chr1	69433254	69435409	+	ENSG00000229639	RP3-380B4.1	lincRNA	lncRNA	never	0	0	0	0	0	0	0	0	0	0	0	0	0	0	0
chr1	69568397	70151945	+	ENSG00000033122	LRRC7	protein_coding	coding	never	0.00733676	0	0.00366838	0.0634506	0.0294421	0.0464463	0.157816	0.374249	0.266033	0.552399	0.849337	0.700868	0.565342	0.656122	0.610732
chr1	70013981	70031222	-	ENSG00000237919	RP11-181B18.1	antisense	lncRNA	never	0	0	0	0	0	0	0	0	0	0	0	0	0	0	0
chr1	69606854	69608301	-	ENSG00000270615	SGO1P1	processed_pseudogene	other	never	0	0	0	0	0	0	0	0	0	0	0	0	0	0	0
chr1	69879591	69879895	+	ENSG00000240692	RN7SL538P	misc_RNA	other	never	0	0	0	0	0	0	0	0	0	0	0	0	0	0	0
chr1	69919321	69920317	+	ENSG00000229359	PIN1P1	transcribed_processed_pseudogene	other	never	0.427008	0.0930256	0.260017	0	0.102523	0.0512615	0.161024	0	0.080512	0.252603	0.102293	0.177448	0.269552	0.105973	0.187762
chr1	70144804	70205620	-	ENSG00000066557	LRRC40	protein_coding	coding	constitutive	11.5843	12.2788	11.9315	9.73194	9.51833	9.62514	7.76593	12.43	10.098	11.1989	11.046	11.1225	6.98509	10.6234	8.80424
chr1	70180143	70180440	-	ENSG00000244389	RN7SL242P	misc_RNA	other	never	0	0	0	0	0	0	0	0.106414	0.053207	0.262621	0	0.13131	0	0	0
chr1	70205681	70253052	+	ENSG00000116754	SRSF11	protein_coding	coding	constitutive	126.554	98.4276	112.491	103.082	111.957	107.519	139.173	127.42	133.297	172.77	135.961	154.365	122.436	142.098	132.267
chr1	70218588	70221023	-	ENSG00000228988	RP4-677H15.4	antisense	lncRNA	never	0	0	0	0.0408542	0	0.0204271	0	0	0	0	0.2328	0.1164	0	0	0
chr1	70260587	70354734	-	ENSG00000118454	ANKRD13C	protein_coding	coding	constitutive	4.86713	5.96264	5.41488	5.86727	3.86344	4.86536	4.61038	7.8825	6.24644	4.77827	8.43557	6.60692	4.71438	6.99205	5.85321
chr1	70354804	70385339	+	ENSG00000197568	HHLA3	protein_coding	coding	constitutive	17.1161	18.5206	17.8183	18.7252	15.7251	17.2251	9.85	6.05314	7.95157	8.47292	8.88141	8.67717	8.55883	8.01885	8.28884
chr1	70359561	70360437	-	ENSG00000226088	RP11-180O5.2	antisense	lncRNA	never	0	0	0	0	0.0524888	0.0262444	0.0824393	0.0262014	0.0543204	0.0646625	0.104742	0.0847023	0.0345006	0.10851	0.0715053
chr1	70363779	70366135	-	ENSG00000279230	AL158839.1	protein_coding	coding	never	0	0	0	0	0	0	0	0	0	0	0	0	0	0	0
chr1	70411217	70439851	+	ENSG00000116761	CTH	protein_coding	coding	constitutive	7.28026	7.40013	7.34019	5.13626	7.79983	6.46805	5.66018	4.71095	5.18557	4.34217	2.45614	3.39915	3.02837	2.87472	2.95154
chr1	70430895	70431178	+	ENSG00000278636	Metazoa_SRP	misc_RNA	other	never	0	0.33542	0.16771	0	0	0	0	0	0	0	0	0	0	0	0
chr1	70445070	70445536	+	ENSG00000271992	RP11-42O15.3	lincRNA	lncRNA	never	0.687391	2.24627	1.46683	1.06397	0.525129	0.79455	0.765859	1.08598	0.92592	0.277252	1.60927	0.943261	0.246546	1.31822	0.782383
chr1	70530525	70531492	+	ENSG00000233020	RP11-42O15.2	processed_pseudogene	other	never	0.0210201	0.0248047	0.0229124	0	0.0126172	0.0063086	0.0198166	0.00629823	0.0130574	0.0310869	0.0062944	0.0186906	0.0331728	0	0.0165864
chr1	70660656	70661265	-	ENSG00000237033	CASP3P1	processed_pseudogene	other	never	0	0	0	0.0252101	0	0.012605	0	0	0	0	0	0	0	0	0
chr1	70706452	70786468	+	ENSG00000229051	RP5-952N6.1	lincRNA	lncRNA	never	0	0	0	0.0267004	0	0.0133502	0	0	0	0	0	0	0	0	0
chr1	70715932	70720289	-	ENSG00000226208	RP11-99H8.1	lincRNA	lncRNA	never	0	0	0	0	0	0	0	0	0	0	0	0	0	0	0
chr1	70852352	71047808	-	ENSG00000050628	PTGER3	protein_coding	coding	stage_specific	0.226571	0.229663	0.228117	0.0610109	0.00844195	0.0347264	0.0206148	0.0112375	0.0159262	1.27276	2.63539	1.95408	1.83584	1.58369	1.70976
chr1	70947378	70951493	+	ENSG00000235782	RP3-333A15.1	antisense	lncRNA	never	0	0	0	0	0	0	0	0	0	0.0874164	0.0530996	0.070258	0	0	0
chr1	71005853	71006502	-	ENSG00000269933	RP3-333A15.2	sense_intronic	lncRNA	never	0.0363181	0	0.018159	0	0	0	0	0.0217639	0.0108819	0.107423	0.369762	0.238593	0.085973	0.0901326	0.0880528
chr1	71048854	71067184	+	ENSG00000235079	ZRANB2-AS1	antisense	lncRNA	never	0.139633	0.177448	0.158541	0.35221	0	0.176105	0.0877588	0.13946	0.113609	0.153202	0.573082	0.363142	0.0550903	0.163053	0.109072
chr1	71063290	71081297	-	ENSG00000132485	ZRANB2	protein_coding	coding	constitutive	40.8668	43.5551	42.2109	33.5793	31.5366	32.5579	50.8132	58.4043	54.6088	49.2706	45.5754	47.423	34.9628	45.0612	40.012
chr1	71067630	71067716	-	ENSG00000207721	MIR186	miRNA	other	never	0	0	0	0	0	0	0	0	0	0	0	0	0	0	0
chr1	71081323	71489976	+	ENSG00000229956	ZRANB2-AS2	processed_transcript	lncRNA	never	0.142409	0.0302771	0.0863431	0.282974	0.523206	0.40309	0.30589	0.35522	0.330555	0.571786	0.612467	0.592127	0.209309	0.433207	0.321258
chr1	71395939	72282734	-	ENSG00000172260	NEGR1	protein_coding	coding	stage_specific	0.275241	0.250523	0.262882	0.192852	0.110105	0.151478	0.202553	0.183451	0.193002	1.53956	2.83404	2.1868	2.96224	3.67708	3.31966
chr1	71367053	71367303	-	ENSG00000226324	RP11-115M14.1	processed_pseudogene	other	never	0	0	0	0	0	0	0	0	0	0	0	0	0	0.382321	0.191161
chr1	71570955	71573558	+	ENSG00000231985	RP11-82L20.1	antisense	lncRNA	never	0	0	0	0	0	0	0	1.80932	0.90466	0	0.904111	0.452055	0	0.936636	0.468318
chr1	71738172	71738354	+	ENSG00000271618	RP11-175G14.2	processed_pseudogene	other	never	0	0	0	0	0	0	0	0	0	1.61966	0	0.80983	0	0	0
chr1	71794231	71837012	-	ENSG00000228853	NEGR1-IT1	sense_intronic	lncRNA	never	0	0	0	0	0	0	0	0	0	0	0	0	0	0.0305821	0.0152911
chr1	72274551	72275159	+	ENSG00000233994	GDI2P2	processed_pseudogene	other	constitutive	14.6689	13.359	14.0139	15	17.6819	16.3409	17.4752	22.3123	19.8938	15.2628	13.8377	14.5503	13.7253	13.7885	13.7569
chr1	72301471	72301829	+	ENSG00000227207	RPL31P12	processed_pseudogene	other	never	0	0.0294854	0.0147427	0	0	0	0	0.0216283	0.0108141	0	0	0	0	0	0
chr1	72717662	72717769	-	ENSG00000212366	RNU6-1246P	snRNA	other	never	0	0	0	0	0	0	37.539	0	18.7695	0	0	0	0	0	0
chr1	72748920	72899140	-	ENSG00000225087	RP4-660H19.1	lincRNA	lncRNA	never	0.373298	0.617466	0.495382	0.0871859	0.132782	0.109984	0.364959	0.033141	0.19905	0.36805	0.110403	0.239227	0.130915	0.22303	0.176973
chr1	72765030	72791282	+	ENSG00000227016	RP11-262K1.1	lincRNA	lncRNA	never	0	0	0	0	0	0	0.0127873	0	0.00639365	0	0	0	0	0.00841556	0.00420778
chr1	72979013	72979314	-	ENSG00000280317	RP11-25L19.1	TEC	lncRNA	never	0	0	0	0	0	0	0	0	0	0	0	0	0	0	0
chr1	73104791	73106282	+	ENSG00000229636	KRT8P21	processed_pseudogene	other	never	0	0	0	0	0	0	0	0	0	0	0	0	0.0122384	0.00449069	0.00836454
chr1	73191603	73191855	-	ENSG00000251825	RN7SKP19	misc_RNA	other	never	0	0	0	0	0	0	0	0	0	0	0	0	0	0	0
chr1	73306169	73355253	+	ENSG00000233973	LINC01360	lincRNA	lncRNA	never	0	0	0	0	0	0	0	0	0	0	0.0415116	0.0207558	0	0	0
chr1	73635215	73715214	+	ENSG00000223479	RP4-788P17.1	lincRNA	lncRNA	never	0	0	0	0	0	0	0	0	0	0	0	0	0	0	0
chr1	73749516	73749623	-	ENSG00000200601	RNA5SP50	rRNA	other	never	0	0	0	0	0	0	0	0	0	0	0	0	0	0	0
chr1	73883713	73883822	+	ENSG00000252005	RNU4ATAC8P	snRNA	other	never	0	0	0	0	0	0	0	0	0	0	0	0	0	0	0
chr1	74026014	74198187	-	ENSG00000162620	LRRIQ3	protein_coding	coding	never	0.427235	0.455593	0.441414	0.605093	0.484848	0.544971	0.259838	0.423322	0.34158	0.789497	0.712749	0.751123	0.393575	0.572653	0.483114
chr1	74198211	74234086	+	ENSG00000254685	FPGT	protein_coding	coding	constitutive	2.81662	2.13672	2.47667	3.24572	4.36132	3.80352	2.87427	3.09861	2.98644	4.63457	3.85234	4.24345	2.74247	3.68699	3.21473
chr1	74198234	74543982	+	ENSG00000259030	FPGT-TNNI3K	protein_coding	coding	never	2.38649	0.15886	1.27268	0.217899	0.342026	0.279963	1.26485	0.145608	0.705229	1.03168	0.0591592	0.54542	0.0440984	0.0701555	0.057127
chr1	74235400	74544428	+	ENSG00000116783	TNNI3K	protein_coding	coding	never	0.0685317	0.178483	0.123507	0.177366	0.0109661	0.0941661	0.22384	0.461915	0.342878	0.265139	0.203318	0.234229	0.0820301	0.110586	0.0963081
chr1	74341578	74378802	-	ENSG00000237324	RP11-439H8.4	antisense	lncRNA	never	0	0	0	0	0	0	0	0	0	0	0.0385722	0.0192861	0	0.0340127	0.0170063
chr1	74468194	74469543	+	ENSG00000233894	RP4-650F12.2	antisense	lncRNA	never	0	0	0	0	0	0	0	0	0	0.082363	0.240919	0.161641	0	0.0345532	0.0172766
chr1	74469877	74512614	-	ENSG00000162621	LRRC53	protein_coding	coding	never	0	0	0	0	0	0	0	0	0	0.0128704	0.177206	0.0950382	0.302149	0.529146	0.415648
chr1	74568110	74673738	-	ENSG00000178965	ERICH3	protein_coding	coding	never	0.00326251	0	0.00163126	0.00538883	0.0039166	0.00465271	0.00806081	0.00901953	0.00854017	0.113391	0.365631	0.239511	0.907919	1.27649	1.0922
chr1	74577429	74626098	+	ENSG00000234497	ERICH3-AS1	antisense	lncRNA	never	0.00340395	0	0.00170198	0	0	0	0	0	0	0	0.0142702	0.0071351	0.00268596	0.036749	0.0197175
chr1	74698768	74699333	-	ENSG00000272864	RP11-17E13.2	lincRNA	lncRNA	never	0.0899235	0.146927	0.118425	0.255176	0.053976	0.154576	0.16955	0.323325	0.246438	0.332473	1.7772	1.05484	0.354781	1.33901	0.846896
chr1	74705481	74733408	-	ENSG00000116791	CRYZ	protein_coding	coding	constitutive	33.9003	27.9055	30.9029	19.1685	24.2627	21.7156	28.8057	27.0296	27.9176	39.1966	26.5292	32.8629	31.3371	32.5862	31.9616
chr1	74733151	74766678	+	ENSG00000162623	TYW3	protein_coding	coding	constitutive	24.8617	18.6791	21.7704	12.5353	12.981	12.7582	11.2448	16.41	13.8274	14.6451	12.1322	13.3887	8.42039	10.6108	9.51559
chr1	74963313	74965118	+	ENSG00000229943	RP11-93N20.1	lincRNA	lncRNA	never	0	0	0	0	0	0	0	0	0	0	0	0	0	0	0
chr1	75122517	75123927	-	ENSG00000261213	RP11-510C10.4	lincRNA	lncRNA	never	0	0	0	0	0	0	0	0	0	0	0	0	0	0	0
chr1	75127829	75133058	-	ENSG00000224127	RP11-510C10.2	antisense	lncRNA	never	0	0.0188731	0.00943655	0	0	0	0	0	0	0	0	0	0	0	0
chr1	75128433	75161533	+	ENSG00000162624	LHX8	protein_coding	coding	never	0.010225	0	0.0051125	0.00644791	0	0.00322396	0	0	0	0.01155	0	0.005775	0	0.00484548	0.00242274
chr1	75129973	75132576	-	ENSG00000224149	RP11-510C10.3	antisense	lncRNA	never	0	0	0	0	0	0	0	0	0	0	0	0	0	0	0
chr1	75183044	75183147	+	ENSG00000206999	RNU6-622P	snRNA	other	never	0	0	0	0	0	0	0	0	0	0	0	0	0	0	0
chr1	75202130	75611116	-	ENSG00000137968	SLC44A5	protein_coding	coding	stage_specific	0.597871	1.01567	0.80677	1.05444	0.723219	0.88883	3.05751	3.75191	3.40471	4.40725	5.34676	4.877	5.98555	6.27481	6.13018
chr1	75521561	75522231	+	ENSG00000224493	RP11-87O11.1	processed_pseudogene	other	never	0	0	0	0	0	0	0	0	0	0.0512483	0.103766	0.0775071	0	0	0
chr1	75538014	75538119	-	ENSG00000252338	RNU6-503P	snRNA	other	never	0	0	0	0	0	0	0	30.3369	15.1684	0	0	0	0	31.4091	15.7045
chr1	75582098	75582555	+	ENSG00000213579	RP4-595K12.1	processed_pseudogene	other	never	0.0431908	0.267578	0.155384	0.238316	0.0518499	0.145083	0.626038	0.627649	0.626843	0.159688	0.517333	0.33851	0.153363	0.308168	0.230766
chr1	75641345	75642087	-	ENSG00000230863	RP4-595K12.2	processed_pseudogene	other	never	0.089834	0.0652359	0.077535	0.0377662	0.0179741	0.0278701	0.0705755	0.107668	0.0891217	0.0442855	0.0717347	0.0580101	0.0472571	0.0278682	0.0375627
chr1	75710002	75724011	-	ENSG00000178193	RP4-682C21.5	antisense	lncRNA	never	0	0	0	0	0	0	0	0	0	0	0	0	0	0	0
chr1	75724346	75787575	+	ENSG00000117054	ACADM	protein_coding	coding	constitutive	26.4836	15.1144	20.799	21.3193	29.2398	25.2796	16.9634	16.8553	16.9093	32.013	19.8897	25.9514	16.7832	20.7221	18.7526
chr1	75786196	75795079	+	ENSG00000137955	RABGGTB	protein_coding	coding	constitutive	49.193	34.9351	42.0641	25.2486	41.4369	33.3428	22.6545	25.8601	24.2573	19.33	19.4745	19.4022	18.0972	21.8606	19.9789
chr1	75787071	75787150	+	ENSG00000206620	SNORD45C	snoRNA	other	never	0	0	0	0	0	0	0	0	0	0	0	0	0	0	0
chr1	75787888	75787972	+	ENSG00000207241	SNORD45A	snoRNA	other	never	0	0	0	0	0	0	0	0	0	0	0	0	0	0	0
chr1	75789476	75789548	+	ENSG00000201487	SNORD45B	snoRNA	other	never	0	0	0	0	0	0	0	0	0	0	0	0	0	0	0
chr1	75743422	75744776	-	ENSG00000181227	DLSTP1	processed_pseudogene	other	pp1_restricted	1.31322	0.628189	0.970704	0.341762	0.709007	0.525385	1.10047	0.607913	0.854191	1.91131	1.45228	1.68179	0.921089	0.465583	0.693336
chr1	75796881	75913238	+	ENSG00000057468	MSH4	protein_coding	coding	never	0.0259812	0.0679215	0.0469514	0.0425977	0.043666	0.0431318	0.0195949	0.0217972	0.0206961	0.0307391	0.0653518	0.0480455	0.020501	0.0838225	0.0521617
chr1	75918872	75932431	-	ENSG00000154007	ASB17	protein_coding	coding	never	0	0	0	0	0	0	0	0	0	0	0	0	0	0	0
chr1	75932478	76019356	+	ENSG00000225605	RP11-550H2.1	lincRNA	lncRNA	never	0	0	0	0.0225408	0	0.0112704	0	0	0	0	0	0	0	0	0
chr1	76041690	76066228	+	ENSG00000230027	RP11-550H2.2	lincRNA	lncRNA	never	0	0	0	0	0	0	0	0	0	0	0	0	0	0	0
chr1	76074718	76634601	+	ENSG00000184005	ST6GALNAC3	protein_coding	coding	constitutive	4.41423	5.12487	4.76955	1.36589	1.04121	1.20355	7.50795	7.79587	7.65191	4.7027	2.77823	3.74046	4.71098	3.71332	4.21215
chr1	76353582	76354246	-	ENSG00000223905	RP11-335E14.1	processed_pseudogene	other	never	0	0	0	0	0	0	0	0	0	0.0519287	0.0420576	0.0469931	0	0	0
chr1	76636876	76637339	+	ENSG00000272855	RP5-1102E8.3	lincRNA	lncRNA	never	0	0.0344413	0.0172207	0.0398774	0	0.0199387	0.0596165	0.0378954	0.0487559	0	0.0757446	0.0378723	0.0498987	0.117704	0.0838013
chr1	76699788	76700538	+	ENSG00000226415	TPI1P1	processed_pseudogene	other	constitutive	6.88318	7.92075	7.40196	5.6272	7.02368	6.32544	6.40102	5.58911	5.99507	2.99572	2.2172	2.60646	4.03471	2.42508	3.22989
chr1	76753134	76753240	+	ENSG00000199921	RNU6-161P	snRNA	other	never	0	0	0	0	0	0	0	0	0	0	0	0	0	0	0
chr1	76758123	76779267	-	ENSG00000237552	RP11-415A20.1	lincRNA	lncRNA	never	0	0	0	0	0	0	0	0	0	0	0	0	0	0	0
chr1	76867440	77065711	+	ENSG00000117069	ST6GALNAC5	protein_coding	coding	constitutive	2.44525	2.00125	2.22325	18.5864	14.6487	16.6176	2.21595	3.0191	2.61753	2.27355	1.19675	1.73515	13.5751	11.8735	12.7243
chr1	77060142	77060202	+	ENSG00000276081	MIR7156	miRNA	other	never	0	0	0	0	0	0	0	0	0	0	0	0	0	0	0
chr1	77067919	77078482	+	ENSG00000230498	RP4-564M11.2	antisense	lncRNA	never	0.0556916	0.121327	0.0885093	0.561906	0.534856	0.548381	0.157509	0.100121	0.128815	0.082363	0.0667067	0.0745348	0.175779	0.310979	0.243379
chr1	77088989	77219430	-	ENSG00000142892	PIGK	protein_coding	coding	constitutive	20.7848	14.0937	17.4393	8.97316	11.6479	10.3105	12.2555	13.5151	12.8853	12.1592	8.27277	10.216	14.6294	13.889	14.2592
chr1	77129113	77129668	+	ENSG00000226084	RP4-706A16.3	processed_pseudogene	other	constitutive	166.676	142.082	154.379	136.277	160.787	148.532	192.592	229.557	211.075	170.394	110.572	140.483	89.0562	81.7949	85.4256
chr1	77194824	77195395	+	ENSG00000228187	RP11-363H12.1	processed_pseudogene	other	never	0	0.0240785	0.0120392	0.027879	0	0.0139395	0.0208395	0.0132467	0.0170431	0	0.0529544	0.0264772	0	0.0548594	0.0274297
chr1	77282050	77559969	+	ENSG00000154027	AK5	protein_coding	coding	stage_specific	5.27776	5.09097	5.18436	0.164729	0.224747	0.194738	0.0147687	0.146159	0.0804639	0.0912264	0.834711	0.462969	2.3963	3.70936	3.05283
chr1	77346045	77349585	-	ENSG00000233099	RP11-375A5.1	antisense	lncRNA	never	0	0	0	0	0	0	0	0	0	0	0	0	0	0	0
chr1	77420324	77420386	+	ENSG00000251767	RNU7-8P	snRNA	other	never	0	0	0	0	0	0	0	0	0	0	0	0	0	0	0
chr1	77562415	77683419	-	ENSG00000036549	ZZZ3	protein_coding	coding	constitutive	14.9965	13.1793	14.0879	11.5835	11.6641	11.6238	15.2692	20.1764	17.7228	16.5117	15.2135	15.8626	13.899	15.9281	14.9136
chr1	77614868	77614952	+	ENSG00000251785	RNA5SP20	rRNA	other	never	0	0	0	0	0	0	0	0	0	0	0	0	0	0	0
chr1	77645323	77645618	+	ENSG00000243437	RN7SL370P	misc_RNA	other	never	0	0	0	0	0	0	0	0	0	0.535773	0.759374	0.647574	0	0	0
chr1	77695986	77759852	-	ENSG00000077254	USP33	protein_coding	coding	constitutive	16.3227	18.4688	17.3957	17.9106	15.1812	16.5459	20.0497	26.7017	23.3757	25.268	32.8893	29.0786	21.0893	29.5419	25.3156
chr1	77773864	77774864	-	ENSG00000232672	ACTG1P21	processed_pseudogene	other	never	0	0	0	0	0	0	0.00632889	0	0.00316445	0.0148925	0.0120616	0.0134771	0	0	0
chr1	77779623	77879539	+	ENSG00000180488	MIGA1	protein_coding	coding	constitutive	1.45708	1.45811	1.45759	1.42082	1.4037	1.41226	1.13721	1.72429	1.43075	2.55465	2.39856	2.47661	2.49558	2.69058	2.59308
chr1	77779903	77779999	+	ENSG00000222849	RNA5SP21	rRNA	other	never	0	0	0	0	0	0	0	0	0	0	0	0	0	0	0
chr1	77810860	77811781	-	ENSG00000219201	RP11-181C21.4	processed_pseudogene	other	constitutive	13.6561	10.1288	11.8925	16.255	22.5856	19.4203	7.85713	6.7762	7.31667	9.23601	6.72292	7.97947	4.94406	5.89888	5.42147
chr1	77847109	77848802	+	ENSG00000235613	NSRP1P1	processed_pseudogene	other	never	0.150016	0.116721	0.133369	0.138522	0.160797	0.14966	0.166682	0.211904	0.189293	0.261479	0.247071	0.254275	0.139512	0.269255	0.204383
chr1	77853354	77853893	+	ENSG00000232015	HSPE1P25	processed_pseudogene	other	never	0	0	0	0.191623	0	0.0958115	0	0	0	0	0.545963	0.272981	0	0.377069	0.188534
chr1	77881347	77889539	-	ENSG00000235927	NEXN-AS1	antisense	lncRNA	never	0.129702	0.103883	0.116792	0.0252587	0	0.0126293	0.115083	0.13259	0.123837	0.210031	0.397032	0.303532	0.186628	0.118341	0.152484
chr1	77888512	77943895	+	ENSG00000162614	NEXN	protein_coding	coding	stage_specific	3.21098	1.2754	2.24319	0.955299	1.45295	1.20412	4.82328	6.18429	5.50378	11.1176	14.2743	12.6959	6.92539	10.2464	8.5859
chr1	77944054	77979110	-	ENSG00000162613	FUBP1	protein_coding	coding	constitutive	153.42	104.115	128.768	84.6451	98.5627	91.6039	195.311	179.255	187.283	155.904	156.028	155.966	153.746	164.281	159.013
chr1	77979174	78017964	+	ENSG00000162616	DNAJB4	protein_coding	coding	constitutive	7.88595	11.3386	9.61228	8.17289	7.06517	7.61903	10.1816	16.0798	13.1307	16.0737	15.99	16.0318	7.12401	10.0159	8.56996
chr1	77979541	78138449	+	ENSG00000137960	GIPC2	protein_coding	coding	never	0.235747	0.302054	0.2689	0.041295	0.0314456	0.0363703	0.135733	0.268181	0.201957	0.103303	0.151646	0.127474	0.331163	0.423129	0.377146
chr1	78004345	78004554	-	ENSG00000273338	RP11-386I14.4	antisense	lncRNA	stage_specific	1.20843	0.329078	0.768754	0	0	0	1.70887	1.08624	1.39756	3.57433	8.68466	6.1295	0.476771	0.374879	0.425825
chr1	78043382	78044148	-	ENSG00000213561	RP11-386I14.2	processed_pseudogene	other	never	0.143236	0.0468071	0.0950215	0.018065	0	0.0090325	0.0540142	0.0343343	0.0441742	0.0423668	0.0343134	0.0383401	0.0678144	0.0355477	0.051681
chr1	78088987	78089083	-	ENSG00000251958	RNU6-1102P	snRNA	other	never	0	0	0	0	0	0	0	0	0	0	0	0	0	0	0
chr1	78091498	78092054	+	ENSG00000213560	RP11-386I14.3	processed_pseudogene	other	never	0	0.0502573	0.0251286	0	0	0	0	0.0276488	0.0138244	0	0	0	0	0.028626	0.014313
chr1	78094806	78094915	-	ENSG00000202263	RNA5SP22	rRNA	other	never	0	0	0	0	0	0	0	0	0	0	0	0	0	0	0
chr1	78170480	78171237	-	ENSG00000233333	RNFT1P2	processed_pseudogene	other	never	0	0	0	0	0	0	0	0	0	0	0	0	0	0	0
chr1	78229598	78369464	+	ENSG00000237413	MGC27382	processed_transcript	lncRNA	never	0.0165656	0.014559	0.0155623	0.0104463	0	0.00522315	0	0.00533966	0.00266983	0	0	0	0	0	0
chr1	78303883	78539749	+	ENSG00000122420	PTGFR	protein_coding	coding	never	0	0.00837896	0.00418948	0.0946106	0.0695157	0.0820632	0.0181305	0.143777	0.0809538	0	0.00460568	0.00230284	0.00303264	0.0120074	0.00752002
chr1	78317156	78317263	-	ENSG00000227556	RP11-472F19.1	unprocessed_pseudogene	other	never	0	0	0	0	0	0	0	0	0	0	0	0	0	0	0
chr1	78375163	78375268	-	ENSG00000212308	RNA5SP23	rRNA	other	never	0	0	0	0	0	0	0	0	0	0	0	0	0	0	0
chr1	78619921	78646145	+	ENSG00000137959	IFI44L	protein_coding	coding	never	0	0	0	0	0	0	0	0.0148955	0.00744775	0	0	0	0	0	0
chr1	78649795	78664078	+	ENSG00000137965	IFI44	protein_coding	coding	never	0.0185829	0	0.00929145	0	0	0	0	0	0	0	0	0	0	0	0
chr1	78666271	78666695	+	ENSG00000238015	RP4-641G12.3	processed_pseudogene	other	never	0	0	0	0	0	0	0	0	0	0	0	0	0	0	0
chr1	78749072	78750659	+	ENSG00000235400	RP4-641G12.4	processed_pseudogene	other	never	0.0115416	0.00942895	0.0104853	0	0	0	0.00544038	0.0138328	0.00963659	0.017069	0.00691217	0.0119906	0.00455357	0.0250629	0.0148082
chr1	78889763	79006718	-	ENSG00000162618	ADGRL4	protein_coding	coding	gt_restricted	0.45446	0.0964679	0.275464	0.0346329	0	0.0173165	1.11403	1.80179	1.45791	0.0566378	0.0344046	0.0455212	0.214706	0.0445527	0.129629
chr1	79054944	79056055	-	ENSG00000230787	PSAT1P3	processed_pseudogene	other	never	0.0706117	0.0769156	0.0737637	0.011132	0.010596	0.010864	0.0166422	0.031736	0.0241891	0	0	0	0.0208942	0	0.0104471
chr1	79323768	79324852	-	ENSG00000282898	RP4-726F1.2	lincRNA	lncRNA	never	0	0	0	0	0	0	0	0.0274097	0.0137048	0	0	0	0	0	0
chr1	79323768	79324863	+	ENSG00000235011	RP4-726F1.1	lincRNA	lncRNA	never	0	0	0	0	0	0	0	0	0	0	0	0	0	0	0
chr1	79521079	79522203	+	ENSG00000232676	ADH5P2	processed_pseudogene	other	never	0	0.0142161	0.00710805	0.00548663	0.02089	0.0131883	0	0.0191178	0.0095589	0.0128675	0.0138954	0.0133814	0.0114424	0	0.0057212
chr1	80092102	80093237	-	ENSG00000235756	RP11-339A11.1	processed_pseudogene	other	never	0	0	0	0	0	0	0	0	0	0	0	0	0	0	0
chr1	80114942	80116918	+	ENSG00000260322	RP11-339A11.2	lincRNA	lncRNA	never	0	0	0	0.0113462	0.0108	0.0110731	0.00848124	0.0377378	0.0231095	0	0	0	0	0.00558166	0.00279083
chr1	80124003	80124361	+	ENSG00000277670	RP11-339A11.3	unprocessed_pseudogene	other	never	0	0	0	0	0	0	0	0.155474	0.077737	0	0	0	0	0	0
chr1	80283351	80283970	+	ENSG00000236407	HMGB1P18	processed_pseudogene	other	never	0	0	0	0	0	0	0.0367629	0.116842	0.0768024	0	0	0	0	0	0
chr1	80373363	80374621	-	ENSG00000225598	RP11-339D23.1	lincRNA	lncRNA	never	0	0.0234896	0.0117448	0	0	0	0	0	0	0	0	0	0	0	0
chr1	80451082	80452004	-	ENSG00000213559	HNRNPA1P64	processed_pseudogene	other	never	0	0.00405799	0.002029	0	0	0	0.00790226	0.0179613	0.0129318	0	0.0150871	0.00754355	0	0	0
chr1	80464300	80464718	-	ENSG00000227062	RP11-115A15.4	processed_pseudogene	other	never	0	0	0	0	0	0	0	0	0	0	0	0	0	0	0
chr1	80495902	80496233	+	ENSG00000234108	RP11-115A15.2	processed_pseudogene	other	never	0.131628	0	0.065814	0	0	0	0	0	0	0	0.0262771	0.0131386	0	0	0
chr1	80534977	80584363	-	ENSG00000224326	RP5-933B4.1	lincRNA	lncRNA	never	0	0	0	0	0	0	0	0	0	0	0	0	0	0	0
chr1	80535754	80646788	+	ENSG00000234184	RP5-887A10.1	lincRNA	lncRNA	never	0	0	0	0	0	0	0	0	0	0	0	0	0	0	0
chr1	81080789	81081171	+	ENSG00000227937	MTND2P30	processed_pseudogene	other	never	0	0	0	0	0	0	0	0	0	0	0	0	0	0	0
chr1	81098266	81099005	-	ENSG00000229752	RPL7P10	processed_pseudogene	other	never	0.00752878	0.0164018	0.0119653	0.0253208	0	0.0126604	0	0.0120312	0.0060156	0	0.0105209	0.00526045	0	0.00622819	0.00311409
chr1	81208567	81209210	+	ENSG00000235089	RP3-445O10.1	processed_pseudogene	other	never	0	0	0	0	0	0	0.0173577	0	0.00867885	0	0	0	0	0	0
chr1	81251788	81252096	+	ENSG00000223026	RN7SKP247	misc_RNA	other	never	0.159967	0.0871243	0.123546	0	0	0	0	0	0	0	0	0	0	0	0
chr1	81306159	81992436	+	ENSG00000117114	ADGRL2	protein_coding	coding	constitutive	58.6111	45.4253	52.0182	26.5311	32.1718	29.3514	151.773	143.217	147.495	80.3899	45.2056	62.7978	72.9951	38.4477	55.7214
chr1	81426455	81427605	+	ENSG00000224494	HNRNPA3P14	processed_pseudogene	other	never	0	0.00460734	0.00230367	0	0	0	0.0159502	0.0160531	0.0160016	0	0.00337754	0.00168877	0.0178004	0.00612333	0.0119619
chr1	81501793	81503468	+	ENSG00000227288	RP5-837I24.1	processed_pseudogene	other	constitutive	8.53141	9.02424	8.77782	6.40938	6.18547	6.29742	5.42503	4.41915	4.92209	5.18431	4.54963	4.86697	6.10993	3.97636	5.04314
chr1	81505098	81506296	+	ENSG00000227960	RP5-837I24.6	sense_intronic	lncRNA	never	0	0	0	0.075799	0	0.0378995	0	0	0	0	0	0	0	0	0
chr1	81513879	81557702	-	ENSG00000234953	RP5-837I24.2	antisense	lncRNA	never	0	0	0	0	0	0	0	0	0	0	0	0	0	0	0
[truncated: 56,134 more rows]

## Sheet: S1B
lncRNA	proximal TF	cluster
GAS5-AS1	ZBTB37	1
FOXN3-AS1	FOXN3	1
RP11-182J1.3	ZSCAN2	1
RP11-617F23.1	ZNF710	1
RP11-96D1.11	NFATC3	1
CEBPA-AS1	CEBPA	1
AC009506.1	BAZ2B	1
FGD5-AS1	NR2C2	1
RP11-48B3.5	ZBTB10	1
RP11-352M15.2	ARID2	4
RP11-159D12.2	VEZF1	4
LINC00909	ZNF407	4
ZNF561-AS1	ZNF561	4
ADNP-AS1	ADNP	4
NR2F1-AS1	NR2F1	4
ZSCAN16-AS1	ZSCAN16	4
RFX3-AS1	RFX3	4
LINC01560	ZNF41	4
NFYC-AS1	NFYC	6
RP11-422P24.11	CREB3L4	6
GAS5	ZBTB37	6
RP11-66N24.3	ZFHX2	6
RP11-161M6.2	SOX8	6
RP5-1050D4.5	CAMTA2	6
AC012146.7	ZNF232	6
AC074212.6	SIX5	6
CTD-2619J13.14	ZNF584	6
RP4-583P15.10	ZBTB46	6
ZBTB11-AS1	ZBTB11	6
NRSN2-AS1	SOX12	7
CTD-3184A7.4	GMEB2	7
THAP9-AS1	THAP9	7
AC007566.10	GATAD1	7
LINC00982	PRDM16	8
ZNF436-AS1	ZNF436	8
RP11-422P24.10	CREB3L4	8
RP11-465N4.4	ELF3	8
PCAT6	KDM5B	8
HNF1A-AS1	HNF1A	8
PSMA3-AS1	ARID4A	8
RP11-210M15.2	ARNT2	8
RP11-46C24.7	ZNF778	8
RP11-333E1.1	ZNF594	8
RARA-AS1	RARA	8
CTD-2267D19.3	RARA	8
RP11-458J1.1	SMARCE1	8
SOX9-AS1	SOX9	8
RP11-449J21.5	FOXJ1	8
GATA6-AS1	GATA6	8
CTD-2291D10.4	ZNF730	8
LINC01224	ZNF91	8
LINC00665	ZFP14	8
ZNF529-AS1	ZNF529	8
ZNF790-AS1	ZNF790	8
ZNF793-AS1	ZNF793	8
AC074212.5	SIX5	8
CTC-301O7.4	TEAD2	8
ZNF528-AS1	ZNF880	8
ZNF582-AS1	ZNF582	8
ZNF667-AS1	ZNF667	8
CTD-2368P22.1	ZNF606	8
LINC00261	FOXA2	8
RP4-694B14.8	ZNF337	8
THAP7-AS1	THAP7	8
KLF3-AS1	KLF3	8
ZBED3-AS1	ZBED3	8
CTB-119C2.1	NFE2L3	8
HOTAIRM1	HOXA1	8
HOXA-AS2	HOXA2	8
C8orf49	GATA4	8
CTD-2371O3.3	ZNF143	9
RP5-991G20.1	ZFHX3	9
SNAI3-AS1	SNAI3	9
VPS9D1-AS1	ZNF276	9
MAFG-AS1	MAFG	9
CTD-3138B18.5	ZNF544	9
MZF1-AS1	MZF1	9
MINCR	GLI4	9
RP11-338N10.3	CAMTA1	10
RP11-126K1.6	RFX5	10
RP11-638I2.4	YY1	10
RP11-521B24.3	MTA1	10
ZNF213-AS1	ZNF205	10
CTD-2547G23.4	ZKSCAN2	10
RP5-882C2.2	UBTF	10
CTD-2017D11.1	ZNF254	10
CTD-2553L13.10	ZNF181	10
CTB-179K24.3	ZNF296	10
LLNLR-245B6.1	ZSCAN22	10
A1BG-AS1	ZNF497	10
CTD-2619J13.9	ZNF497	10
RP11-548H3.1	ZNF142	10
LINC01521	PATZ1	10
FOXP4-AS1	FOXP4	10
MNX1-AS1	MNX1	10
RP11-25K19.1	TOX	10
RP13-582O9.7	ZNF696	10

## Sheet: S1C
cluster	significant	p.value	term.size	query.size	overlap.size	precision	recall	term.id	domain	term.name	intersection
1	TRUE	4.57e-38	284	1124	103	0.092	0.363	GO:0031012	CC	extracellular matrix	DCN,TNC,ELN,LAMC3,LAMC2,NTN1,FGF10,NTN4,GPC4,COL5A3,WNT11,MMP2,NID2,P3H2,TIMP3,PDGFB,CST3,CRISPLD2,COMP,RARRES2,AEBP1,MEGF9,ECM2,SPOCK2,SOD3,SMOC2,LOX,SPARC,THBS4,FGF1,NID1,F3,CTSD,CTGF,TGFB3,CLU,FMOD,MMP19,COL21A1,OMD,SERPINF1,MATN2,POSTN,COL4A2,ADAMTS8,THBS1,CILP,MMRN1,LUM,FBLN5,COL6A2,HSPG2,CYR61,TINAGL1,DPT,HMCN1,SFRP2,HMCN2,MMP3,DST,SPARCL1,ADAMTS5,SPON2,OLFML2B,IGFBP7,FBLN2,ADAMTS9,CPA3,CLE…
1	TRUE	6.62e-35	202	1124	83	0.074	0.411	GO:0062023	CC	collagen-containing extracellular matrix	DCN,TNC,ELN,LAMC3,LAMC2,NTN1,NTN4,GPC4,COL5A3,MMP2,NID2,P3H2,TIMP3,PDGFB,CST3,COMP,AEBP1,MEGF9,ECM2,SOD3,SMOC2,SPARC,THBS4,NID1,F3,CTSD,TGFB3,CLU,FMOD,COL21A1,OMD,SERPINF1,MATN2,POSTN,COL4A2,ADAMTS8,THBS1,CILP,MMRN1,LUM,FBLN5,COL6A2,HSPG2,TINAGL1,DPT,HMCN1,SFRP2,HMCN2,DST,SPARCL1,ADAMTS5,IGFBP7,FBLN2,ADAMTS9,CPA3,CLEC3B,EDIL3,EGFLAM,COL1A2,SBSPON,ADAMTS15,TNXB,COL3A1,NPNT,SDC2,COL8A2,LAMB2,PODN,C…
1	TRUE	2.08e-26	306	1124	92	0.082	0.301	GO:0043062	BP	extracellular structure organization	DCN,TNC,ELN,LAMC3,LAMC2,BCL3,ITGA8,FAP,COL5A3,B4GALT1,MMP2,NID2,PDGFB,PLTP,CST3,CRISPLD2,COMP,ECM2,SPOCK2,SMOC2,LOX,SPARC,HYAL1,ITGB6,NID1,CTGF,SPP1,FMOD,MMP19,LRP1,SDC4,KDR,RAMP2,ITGB4,POSTN,COL4A2,CD36,ITGA7,AGT,SULF1,THBS1,ITGA11,ITGAV,LUM,FBLN5,COL6A2,HSPG2,CYR61,DPT,ITGA9,PHLDB2,AGTR1,SFRP2,PLA2G7,ADAM12,MMP3,ABCA5,JAM2,ADAMTS5,MPZL3,PDPN,VCAM1,OLFML2B,FBLN2,ADAMTS9,EGFLAM,COL1A2,TNFRSF11B,A…
1	TRUE	3.16e-24	265	1124	82	0.073	0.309	GO:0030198	BP	extracellular matrix organization	DCN,TNC,ELN,LAMC3,LAMC2,BCL3,ITGA8,FAP,COL5A3,B4GALT1,MMP2,NID2,PDGFB,CST3,CRISPLD2,COMP,ECM2,SPOCK2,SMOC2,LOX,SPARC,ITGB6,NID1,CTGF,SPP1,FMOD,MMP19,LRP1,KDR,RAMP2,ITGB4,POSTN,COL4A2,ITGA7,AGT,SULF1,THBS1,ITGA11,ITGAV,LUM,FBLN5,COL6A2,HSPG2,CYR61,DPT,ITGA9,PHLDB2,SFRP2,ADAM12,MMP3,JAM2,ADAMTS5,MPZL3,PDPN,VCAM1,OLFML2B,FBLN2,ADAMTS9,EGFLAM,COL1A2,TNFRSF11B,SERPINF2,TNXB,COL3A1,NPNT,ANTXR1,FGA,FGB,…
1	TRUE	2.76e-21	360	1124	93	0.083	0.258	GO:0003013	BP	circulatory system process	ACSM3,TAC1,ATP1A2,ELN,KCNQ1,ATP2B4,TRHDE,PTGS2,NOX4,PCSK5,KCNK6,PDGFB,NCALD,MEOX2,SLC1A1,CXCL12,NPR3,HRH2,RGS2,TNNT2,CNR1,CTGF,CASQ2,KCNJ8,POPDC2,RAMP3,KCNJ2,DLL4,ATP1B2,KCNA5,HRC,RAMP2,PPARG,POSTN,SPX,CYP2J2,HEY2,AGT,EDNRB,MYOF,PDE5A,ENPEP,TPM1,AGTR1,SLIT2,CAMK2D,ANK2,ADM,SERPING1,ADRA2A,VEGFC,THRB,EDNRA,GJA1,DDAH1,CACNA2D1,TTN,STC1,NPR2,MYL3,CPA3,NPY1R,COL1A2,TMEM65,TMEM133,AVPR1A,SERPINF2,AR,P…
1	TRUE	8.45e-21	352	1124	91	0.081	0.259	GO:0008015	BP	blood circulation	ACSM3,TAC1,ATP1A2,ELN,KCNQ1,ATP2B4,TRHDE,PTGS2,PCSK5,KCNK6,PDGFB,NCALD,MEOX2,SLC1A1,CXCL12,NPR3,HRH2,RGS2,TNNT2,CNR1,CTGF,CASQ2,KCNJ8,POPDC2,KCNJ2,DLL4,ATP1B2,KCNA5,HRC,RAMP2,PPARG,POSTN,SPX,CYP2J2,HEY2,AGT,EDNRB,MYOF,PDE5A,ENPEP,TPM1,AGTR1,SLIT2,CAMK2D,ANK2,ADM,SERPING1,ADRA2A,VEGFC,THRB,EDNRA,GJA1,DDAH1,CACNA2D1,TTN,STC1,NPR2,MYL3,CPA3,NPY1R,COL1A2,TMEM65,TMEM133,AVPR1A,SERPINF2,AR,PTAFR,P2RY1,…
1	TRUE	3.06e-15	486	1124	100	0.089	0.206	GO:0048514	BP	blood vessel morphogenesis	HSPB6,CX3CL1,DCN,C6,NGFR,ADGRF5,FGF10,PTGS2,FAP,WNT11,B4GALT1,MMP2,ANGPT2,JAG1,MEOX2,CCL2,GAB1,SMOC2,SEMA5A,LOX,SPARC,THBS4,FGF1,HYAL1,PRRX1,LEPR,AKT3,F3,CTGF,MMP19,NR4A1,LRP1,PTGIS,HIF3A,RHOJ,KDR,DLL4,RAMP2,PPARG,RAMP1,SERPINF1,APLNR,PDGFRA,COL4A2,TMEM2,HEY2,AGT,SULF1,THBS1,ITGAV,ANXA3,ENPEP,EGF,MYOCD,HSPG2,CYR61,ACKR3,AGTR1,SLIT2,SFRP2,NTRK2,ADAM12,ADM,VEGFC,EDNRA,GJA1,DDAH1,PLXDC1,TGFA,ADAMTS9…
1	TRUE	2.24e-14	95	1124	38	0.034	0.4	GO:0005201	MF	extracellular matrix structural constituent	DCN,TNC,ELN,COL5A3,NID2,COMP,AEBP1,NID1,FMOD,COL21A1,MATN2,POSTN,COL4A2,THBS1,LUM,FBLN5,COL6A2,HSPG2,TINAGL1,DPT,IGFBP7,FBLN2,COL1A2,SBSPON,TNXB,COL3A1,COL8A2,LAMB2,PODN,BGN,COL4A1,COL14A1,PRELP,MFAP5,COL5A2,COL15A1,COL28A1,SPON1
1	TRUE	7.13e-14	330	1124	76	0.068	0.23	GO:0003012	BP	muscle system process	HSPB6,IGF1,ATP1A2,MYOM2,PTGER3,KCNQ1,ATP2B4,LMCD1,PTGS2,PPP1R12B,SORBS1,MYL9,SGCA,PPARGC1A,CRYAB,IGFBP5,RGS2,TNNT2,CTGF,CASQ2,NR4A3,SORBS3,KCNJ8,CALD1,SSPN,KCNJ2,KCNA5,CNN1,HRC,CKMT2,SPX,HEY2,AGT,EDNRB,SCN7A,SULF1,MYOF,PLCE1,PDE5A,TPM1,MYOCD,CAMK2D,ANK2,MLIP,GSN,HMCN2,ADRA2A,FOXO1,EDNRA,GJA1,CACNA2D1,TTN,KIT,STC1,MYL3,LMOD1,KLF15,TMEM133,NPNT,PTAFR,P2RY1,KCND3,GATM,SNTB1,KCNE3,SCN4B,SLC8A1,PRKG1,…
1	TRUE	1.64e-13	385	1124	83	0.074	0.216	GO:0044057	BP	regulation of system process	HSPB6,TAC1,IGF1,ATP1A2,PTGER3,KCNQ1,ATP2B4,FGF10,LMCD1,PTGS2,PPP1R12B,KCNK6,SOX10,PDGFB,MYL9,SLC1A1,SGCA,PPARGC1A,HRH2,IGFBP5,RGS2,TNNT2,CTGF,CASQ2,NR4A3,POPDC2,CRY2,INHBA,KCNJ2,ATP1B2,KCNA5,CNN1,HRC,SPX,CYP2J2,HEY2,AGT,EDNRB,PLCE1,PDE5A,TPM1,FTO,MYOCD,AGTR1,CAMK2D,ANK2,CRHBP,MLIP,ADM,ADRA2A,FOXO1,THRB,GJA1,CACNA2D1,KIT,STC1,NPR2,S100B,MYL3,TMEM65,TMEM133,AVPR1A,TMEM100,NPNT,PTAFR,KCND3,FGA,FGB,C…
1	TRUE	8.71e-13	120	1124	41	0.036	0.342	GO:0008217	BP	regulation of blood pressure	ACSM3,TAC1,ATP1A2,TRHDE,PTGS2,PCSK5,KCNK6,PDGFB,NCALD,NPR3,CNR1,RAMP2,PPARG,POSTN,SPX,AGT,EDNRB,ENPEP,TPM1,AGTR1,ADM,VEGFC,EDNRA,GJA1,DDAH1,NPR2,CPA3,NPY1R,COL1A2,TMEM133,AVPR1A,SERPINF2,AR,PTAFR,CD34,PPARA,BMPR2,EMP2,HBB,GJA5,ADRA2B
1	TRUE	8.8e-13	254	1124	63	0.056	0.248	GO:0006936	BP	muscle contraction	HSPB6,ATP1A2,MYOM2,PTGER3,KCNQ1,PTGS2,PPP1R12B,SORBS1,MYL9,SGCA,CRYAB,RGS2,TNNT2,CTGF,CASQ2,SORBS3,KCNJ8,CALD1,SSPN,KCNJ2,KCNA5,CNN1,HRC,CKMT2,SPX,AGT,EDNRB,SCN7A,SULF1,MYOF,PLCE1,PDE5A,TPM1,MYOCD,CAMK2D,ANK2,HMCN2,ADRA2A,EDNRA,GJA1,CACNA2D1,TTN,KIT,STC1,MYL3,LMOD1,TMEM133,NPNT,PTAFR,KCND3,SNTB1,KCNE3,SCN4B,SLC8A1,PRKG1,RYR1,MB,TPM2,PLN,DMD,KLHL41,GJA5,ADRA2B
1	TRUE	4.58e-12	414	1124	84	0.075	0.203	GO:0001525	BP	angiogenesis	HSPB6,CX3CL1,DCN,C6,NGFR,FGF10,PTGS2,FAP,B4GALT1,MMP2,ANGPT2,JAG1,MEOX2,CCL2,GAB1,SMOC2,SEMA5A,SPARC,THBS4,FGF1,HYAL1,LEPR,AKT3,F3,CTGF,MMP19,NR4A1,PTGIS,HIF3A,RHOJ,KDR,DLL4,RAMP2,PPARG,RAMP1,SERPINF1,APLNR,PDGFRA,COL4A2,TMEM2,AGT,SULF1,THBS1,ITGAV,ANXA3,ENPEP,EGF,HSPG2,CYR61,ACKR3,AGTR1,SLIT2,SFRP2,ADAM12,ADM,VEGFC,EDNRA,DDAH1,PLXDC1,TGFA,ADAMTS9,EMCN,BMPER,SOX17,VEGFD,TMEM100,ANGPTL4,EFNA1,CXCL…
1	TRUE	7.43e-12	186	1124	51	0.045	0.274	GO:1903522	BP	regulation of blood circulation	TAC1,ATP1A2,KCNQ1,ATP2B4,PTGS2,KCNK6,SLC1A1,HRH2,RGS2,TNNT2,CTGF,CASQ2,POPDC2,KCNJ2,ATP1B2,KCNA5,HRC,SPX,CYP2J2,HEY2,AGT,PDE5A,TPM1,AGTR1,CAMK2D,ANK2,ADM,ADRA2A,THRB,GJA1,CACNA2D1,STC1,NPR2,MYL3,TMEM65,TMEM133,AVPR1A,PTAFR,KCND3,FGA,FGB,KCNE3,SCN4B,SLC8A1,RYR1,KCNMB2,PLN,DMD,BMPR2,GJA5,ADRA2B
1	TRUE	2.23e-11	250	1124	60	0.053	0.24	GO:0019932	BP	second-messenger-mediated signaling	IGF1,ATP1A2,ATP2B4,LMCD1,ADCYAP1R1,RAPGEF4,JPH4,NCALD,RASD1,ARRDC3,SELENOK,RGS2,CASQ2,PTGFR,RAMP3,GNAI1,KDR,ADCY4,HRC,RGN,RAMP2,RAMP1,APLNR,CD36,AGT,EDNRB,THBS1,PLCE1,PDE5A,GNAL,AGTR1,CAMK2D,ANK2,EIF4EBP2,ADM,JPH2,ADRA2A,GUCY1A2,DDAH1,GNAQ,DMTN,NPR2,PTH1R,VCAM1,DEFB1,ABCA1,AVPR1A,TMEM100,CXCL8,RCAN2,PDE3A,NDNF,NUDT4,SLC8A1,PRKG1,PDE2A,LPAR1,PLN,DMD,ADRA2B
1	TRUE	3.45e-11	491	1124	92	0.082	0.187	GO:0005509	MF	calcium ion binding	PCDHB4,PCDHGA2,NID2,CRTAC1,MYL9,JAG1,NCALD,COMP,SPOCK2,SGCA,TBC1D9,MAN1A1,SMOC2,SPARC,THBS4,PLSCR4,EFHD1,NID1,PADI2,MAN1C1,CASQ2,NECAB1,LRP1,MASP1,DLL4,HRC,RGN,AOC3,MATN2,TBC1D8B,TMEM2,PRRG4,AOAH,SYTL2,SULF1,THBS1,MMRN1,ANXA3,EGF,FBLN5,CDH11,RCN3,HSPG2,HMCN1,ANXA9,SLIT2,PAM,GSN,HMCN2,PAMR1,DST,SPARCL1,TTN,MICU3,CABP1,CLSTN2,C1R,S100B,MYL3,ADGRL4,VSNL1,HPGDS,FSTL1,FBLN2,CLEC3B,EDIL3,EGFLAM,SVEP1,N…
1	TRUE	9.4e-11	81	1124	31	0.028	0.383	GO:0005604	CC	basement membrane	TNC,LAMC3,LAMC2,NTN1,NTN4,NID2,P3H2,TIMP3,CST3,MEGF9,SMOC2,SPARC,THBS4,NID1,SERPINF1,MATN2,COL4A2,HSPG2,HMCN1,HMCN2,DST,EGFLAM,NPNT,COL8A2,LAMB2,THBS2,COL4A1,LAMA2,LAMB3,COL15A1,COL28A1
1	TRUE	1.03e-09	446	1124	83	0.074	0.186	GO:0004888	MF	transmembrane signaling receptor activity	EPHA3,PTGER3,LY75,NGFR,ADGRF5,ABCC9,IL4R,ADCYAP1R1,PDGFRL,FCGRT,EBI3,NRXN2,GHR,NPR3,PRLR,LIFR,HRH2,VIPR1,LEPR,F3,CNR1,CSF3R,PTGFR,RAMP3,FFAR2,KDR,RAMP2,PPARG,RAMP1,APLNR,PDGFRA,EDNRB,ITGA11,SCARB2,EGF,NTRK3,TNFRSF11A,ANXA9,ACKR3,PTPRG,AGTR1,SFRP2,NTRK2,ADRA2A,EDNRA,GFRA1,PLA2R1,FZD1,KIT,IL6R,PTH1R,ADGRL4,OXER1,PIGR,DAPL1,IL17RE,HPGD,NPY1R,TNFRSF11B,ABCA1,AVPR1A,GPRC5B,PTAFR,ANTXR1,P2RY1,INSR,SOST…
1	TRUE	1.06e-09	66	516	27	0.052	0.409	KEGG:04512	keg	ECM-receptor interaction	TNC,LAMC3,LAMC2,ITGA8,COMP,THBS4,ITGB6,SPP1,SDC4,ITGB4,COL4A2,CD36,ITGA7,THBS1,ITGA11,ITGAV,COL6A2,HSPG2,ITGA9,COL1A2,TNXB,LAMB2,SV2B,THBS2,COL4A1,LAMA2,LAMB3
1	TRUE	5.57e-09	145	1124	40	0.036	0.276	GO:0005539	MF	glycosaminoglycan binding	DCN,LTF,LAMC2,FGF10,COL5A3,CHRD,CRISPLD2,COMP,ECM2,SPOCK2,SOD3,SMOC2,SEMA5A,THBS4,FGF1,CTGF,POSTN,ADAMTS8,TLR2,THBS1,CYR61,SLIT2,ADAMTS5,FSTL1,PCOLCE2,CLEC3B,LIPH,EGFLAM,ADAMTS15,TNXB,NDNF,SUSD5,LPL,BGN,THBS2,SERPINA5,COL25A1,PRELP,LAYN,ADGRG1
1	TRUE	9.68e-09	263	1124	57	0.051	0.217	GO:1901342	BP	regulation of vasculature development	HSPB6,CX3CL1,DCN,C6,NGFR,PTGS2,ANGPT2,PDGFB,MEOX2,GAB1,SMOC2,SEMA5A,SPARC,THBS4,FGF1,HYAL1,AKT3,F3,PTGIS,RHOJ,KDR,DLL4,RAMP2,PPARG,SERPINF1,APLNR,COL4A2,TMEM2,HEY2,AGT,SULF1,THBS1,ANXA3,MYOCD,HSPG2,AGTR1,SFRP2,ADAM12,ADM,VEGFC,DDAH1,KIT,ADAMTS9,BMPER,VEGFD,TMEM100,ANGPTL4,EFNA1,CXCL8,PDGFD,LRG1,PTPRM,CD34,CCBE1,THBS2,EMP2,AQP1
1	TRUE	1.55e-08	69	1124	26	0.023	0.377	GO:0005581	CC	collagen trimer	DCN,MSR1,COL5A3,LOX,COL21A1,COL4A2,CD36,LUM,COL6A2,FCN3,COLEC12,COL1A2,CTHRC1,TNXB,COL3A1,COL8A2,C1QA,C1QTNF1,CCBE1,COL4A1,COL14A1,COL25A1,COL5A2,COL15A1,COL28A1,C1QTNF5
1	TRUE	3.52e-08	186	1124	45	0.04	0.242	GO:0003015	BP	heart process	TAC1,ATP1A2,KCNQ1,ATP2B4,NOX4,KCNK6,SLC1A1,RGS2,TNNT2,CTGF,CASQ2,KCNJ8,POPDC2,RAMP3,KCNJ2,ATP1B2,KCNA5,HRC,SPX,CYP2J2,HEY2,AGT,PDE5A,TPM1,CAMK2D,ANK2,ADM,THRB,GJA1,CACNA2D1,TTN,STC1,NPR2,MYL3,TMEM65,AVPR1A,SGCD,KCND3,KCNE3,SCN4B,SLC8A1,RYR1,PLN,DMD,GJA5
1	TRUE	4.08e-08	180	1124	44	0.039	0.244	GO:0090257	BP	regulation of muscle system process	HSPB6,IGF1,ATP1A2,KCNQ1,ATP2B4,LMCD1,PTGS2,PPP1R12B,MYL9,SGCA,PPARGC1A,IGFBP5,RGS2,TNNT2,CTGF,CASQ2,NR4A3,KCNJ2,CNN1,HRC,SPX,AGT,PLCE1,PDE5A,TPM1,MYOCD,CAMK2D,ANK2,MLIP,ADRA2A,FOXO1,KIT,STC1,MYL3,TMEM133,NPNT,PTAFR,KCNE3,SLC8A1,PRKG1,PLN,DMD,GJA5,ADRA2B
1	TRUE	4.41e-08	154	1124	40	0.036	0.26	GO:0008016	BP	regulation of heart contraction	TAC1,ATP1A2,KCNQ1,ATP2B4,KCNK6,SLC1A1,RGS2,TNNT2,CTGF,CASQ2,POPDC2,KCNJ2,ATP1B2,KCNA5,HRC,SPX,CYP2J2,HEY2,AGT,PDE5A,TPM1,CAMK2D,ANK2,ADM,THRB,GJA1,CACNA2D1,STC1,NPR2,MYL3,TMEM65,AVPR1A,KCND3,KCNE3,SCN4B,SLC8A1,RYR1,PLN,DMD,GJA5
1	TRUE	8.23e-08	119	1124	34	0.03	0.286	GO:0006937	BP	regulation of muscle contraction	HSPB6,ATP1A2,KCNQ1,PTGS2,PPP1R12B,MYL9,RGS2,TNNT2,CTGF,CASQ2,KCNJ2,CNN1,HRC,SPX,PLCE1,PDE5A,TPM1,MYOCD,CAMK2D,ANK2,ADRA2A,KIT,STC1,MYL3,TMEM133,NPNT,PTAFR,KCNE3,SLC8A1,PRKG1,PLN,DMD,GJA5,ADRA2B
1	TRUE	8.76e-08	49	1124	21	0.019	0.429	GO:0050840	MF	extracellular matrix binding	DCN,ELN,NTN4,SPOCK2,SPARC,NID1,SPP1,THBS1,ITGAV,CYR61,TINAGL1,ITGA9,SLIT2,SPARCL1,ADAMTS5,OLFML2B,FBLN2,ADAMTS15,BGN,OLFML2A,ADGRG1
1	TRUE	1.04e-07	178	1124	43	0.038	0.242	GO:0060047	BP	heart contraction	TAC1,ATP1A2,KCNQ1,ATP2B4,KCNK6,SLC1A1,RGS2,TNNT2,CTGF,CASQ2,KCNJ8,POPDC2,KCNJ2,ATP1B2,KCNA5,HRC,SPX,CYP2J2,HEY2,AGT,PDE5A,TPM1,CAMK2D,ANK2,ADM,THRB,GJA1,CACNA2D1,TTN,STC1,NPR2,MYL3,TMEM65,AVPR1A,SGCD,KCND3,KCNE3,SCN4B,SLC8A1,RYR1,PLN,DMD,GJA5
1	TRUE	1.07e-07	108	1124	32	0.028	0.296	GO:0008201	MF	heparin binding	LTF,LAMC2,FGF10,COL5A3,CHRD,CRISPLD2,COMP,ECM2,SOD3,SMOC2,THBS4,FGF1,CTGF,POSTN,ADAMTS8,THBS1,CYR61,SLIT2,ADAMTS5,FSTL1,PCOLCE2,CLEC3B,LIPH,ADAMTS15,TNXB,NDNF,LPL,THBS2,SERPINA5,COL25A1,PRELP,ADGRG1
1	TRUE	1.29e-07	397	1124	72	0.064	0.181	GO:2000147	BP	positive regulation of cell motility	TAC1,IGF1,SNAI2,LAMC2,NTN1,FGF10,PTGS2,SEMA3C,CXCL2,WNT11,NOX4,TF,EPB41L4B,PDGFB,RARRES2,CXCL12,SPOCK2,GAB1,SMOC2,SEMA5A,SPARC,THBS4,FGF1,SELENOK,HYAL1,IGFBP5,AKT3,F3,NR4A3,RHOJ,KDR,PLVAP,POSTN,PDGFRA,AGT,CCL21,THBS1,SEMA6D,ITGAV,ANXA3,EGF,NTRK3,CYR61,ACKR3,CAMK2D,PDGFC,CXCL14,PLA2G7,HMCN2,ADRA2A,VEGFC,KIT,DMTN,IL6R,CXCL16,PLPP3,PDPN,DEFB1,VEGFD,ATOH8,PTAFR,CXCL8,PDGFD,INSR,CCL19,SLC8A1,CCBE1,FAM…
1	TRUE	1.56e-07	281	1124	57	0.051	0.203	GO:0031589	BP	cell-substrate adhesion	CX3CL1,EPHA3,ARHGAP6,LIMCH1,ITGA8,COL5A3,NID2,ANGPT2,SORBS1,JAG1,MSLN,AGR2,ECM2,KANK1,SPOCK2,SMOC2,ITGB6,NID1,CTGF,SORBS3,SDC4,KDR,ITGB4,POSTN,CD36,ITGA7,CCL21,THBS1,ITGA11,RAB1A,ITGAV,PPFIA2,FBLN5,CYR61,PHLDB2,VEGFC,CCL28,DMTN,PDPN,VCAM1,FBLN2,ADAMTS9,EDIL3,EGFLAM,DLC1,COL3A1,NPNT,EFNA1,ANTXR1,FGA,FGB,NDNF,CD34,FZD4,S100A10,DMD,EMP2
1	TRUE	1.98e-07	238	1124	51	0.045	0.214	GO:0045765	BP	regulation of angiogenesis	HSPB6,CX3CL1,DCN,C6,NGFR,PTGS2,ANGPT2,MEOX2,GAB1,SMOC2,SEMA5A,SPARC,THBS4,FGF1,HYAL1,AKT3,F3,PTGIS,RHOJ,KDR,DLL4,RAMP2,PPARG,SERPINF1,APLNR,COL4A2,TMEM2,AGT,SULF1,THBS1,ANXA3,HSPG2,AGTR1,SFRP2,ADAM12,ADM,VEGFC,DDAH1,ADAMTS9,BMPER,VEGFD,ANGPTL4,EFNA1,CXCL8,LRG1,PTPRM,CD34,CCBE1,THBS2,EMP2,AQP1
1	TRUE	3.01e-07	100	1124	30	0.027	0.3	GO:0019935	BP	cyclic-nucleotide-mediated signaling	ATP2B4,ADCYAP1R1,RAPGEF4,ARRDC3,RGS2,RAMP3,GNAI1,ADCY4,RAMP2,RAMP1,APLNR,CD36,EDNRB,THBS1,GNAL,EIF4EBP2,ADM,ADRA2A,GNAQ,NPR2,PTH1R,DEFB1,ABCA1,PDE3A,NUDT4,PRKG1,PDE2A,LPAR1,PLN,ADRA2B
1	TRUE	3.39e-07	52	1124	21	0.019	0.404	GO:0042310	BP	vasoconstriction	ATP1A2,PTGS2,HRH2,KCNA5,AGT,EDNRB,AGTR1,ADM,ADRA2A,EDNRA,GJA1,TMEM133,AVPR1A,PTAFR,FGA,FGB,SLC8A1,KCNMB2,BMPR2,GJA5,ADRA2B
1	TRUE	3.93e-07	113	1124	32	0.028	0.283	GO:0003018	BP	vascular process in circulatory system	ATP1A2,PTGS2,HRH2,RGS2,KCNA5,RAMP2,AGT,EDNRB,AGTR1,SLIT2,ADM,ADRA2A,EDNRA,GJA1,DDAH1,TMEM133,AVPR1A,SERPINF2,PTAFR,P2RY1,FGA,FGB,PDE3A,PTPRM,SLC8A1,PRKG1,PDE2A,KCNMB2,BMPR2,HBB,GJA5,ADRA2B
1	TRUE	4.33e-07	279	516	58	0.112	0.208	KEGG:04151	keg	PI3K-Akt signaling pathway	IGF1,TNC,LAMC3,LAMC2,NGFR,FGF10,IL4R,ITGA8,ANGPT2,PDGFB,PPP2CB,COMP,GHR,THBS4,PRLR,FGF1,ITGB6,AKT3,FOXO3,SPP1,CCND2,CSF3R,NR4A1,KDR,ITGB4,NGF,PDGFRA,COL4A2,ITGA7,TLR2,THBS1,ITGA11,ITGAV,EGF,COL6A2,ITGA9,PDGFC,NTRK2,VEGFC,KIT,THEM4,IL6R,PRKAA2,TGFA,COL1A2,VEGFD,TNXB,EFNA1,PDGFD,INSR,LAMB2,NTF3,THBS2,COL4A1,LAMA2,LAMB3,LPAR1,GNG10
1	TRUE	4.51e-07	172	1124	41	0.036	0.238	GO:1901681	MF	sulfur compound binding	MGST1,LTF,LAMC2,FGF10,COL5A3,CHRD,CRISPLD2,COMP,ECM2,SOD3,SMOC2,SEMA5A,THBS4,FGF1,ACADL,CTGF,ALDH6A1,LRP1,POSTN,FST,ADAMTS8,THBS1,CYR61,SLIT2,ADAMTS5,FSTL1,PCOLCE2,CLEC3B,LIPH,ADAMTS15,TNXB,NDNF,CD34,PCCA,LPL,THBS2,SERPINA5,COL25A1,PRELP,ENPP1,ADGRG1
1	TRUE	5.21e-07	409	1124	72	0.064	0.176	GO:0051272	BP	positive regulation of cellular component movement	TAC1,IGF1,SNAI2,LAMC2,NTN1,FGF10,PTGS2,SEMA3C,CXCL2,WNT11,NOX4,TF,EPB41L4B,PDGFB,RARRES2,CXCL12,SPOCK2,GAB1,SMOC2,SEMA5A,SPARC,THBS4,FGF1,SELENOK,HYAL1,IGFBP5,AKT3,F3,NR4A3,RHOJ,KDR,PLVAP,POSTN,PDGFRA,AGT,CCL21,THBS1,SEMA6D,ITGAV,ANXA3,EGF,NTRK3,CYR61,ACKR3,CAMK2D,PDGFC,CXCL14,PLA2G7,HMCN2,ADRA2A,VEGFC,KIT,DMTN,IL6R,CXCL16,PLPP3,PDPN,DEFB1,VEGFD,ATOH8,PTAFR,CXCL8,PDGFD,INSR,CCL19,SLC8A1,CCBE1,FAM…
1	TRUE	5.73e-07	153	1124	38	0.034	0.248	GO:1904018	BP	positive regulation of vasculature development	HSPB6,CX3CL1,C6,PTGS2,ANGPT2,PDGFB,GAB1,SMOC2,SEMA5A,FGF1,HYAL1,AKT3,F3,PTGIS,RHOJ,KDR,RAMP2,APLNR,THBS1,ANXA3,MYOCD,AGTR1,SFRP2,ADAM12,ADM,VEGFC,DDAH1,KIT,BMPER,VEGFD,TMEM100,ANGPTL4,CXCL8,PDGFD,LRG1,CD34,CCBE1,AQP1
1	TRUE	6.67e-07	109	1124	31	0.028	0.284	GO:0007187	BP	G-protein coupled receptor signaling pathway, coupled to cyclic nucleotide second messenger	ATP2B4,RGS1,CCL2,ARRDC3,NPR3,HRH2,VIPR1,RGS2,CNR1,RAMP3,GNAI1,ADCY4,RAMP2,RAMP1,AGT,GNAL,ADM,ADRA2A,EDNRA,GNA14,GNAQ,PTH1R,OXER1,NPY1R,ABCA1,P2RY1,PTGER4,PDE2A,LPAR1,PLN,ADRA2B
1	TRUE	9.59e-07	70	1124	24	0.021	0.343	GO:0002027	BP	regulation of heart rate	TAC1,KCNQ1,SLC1A1,CASQ2,POPDC2,KCNJ2,KCNA5,HRC,SPX,HEY2,AGT,TPM1,CAMK2D,ANK2,ADM,CACNA2D1,AVPR1A,KCND3,KCNE3,SCN4B,SLC8A1,PLN,DMD,GJA5
1	TRUE	9.83e-07	423	1124	73	0.065	0.173	GO:0040017	BP	positive regulation of locomotion	TAC1,IGF1,SNAI2,LAMC2,NTN1,FGF10,PTGS2,SEMA3C,CXCL2,WNT11,NOX4,TF,EPB41L4B,PDGFB,RARRES2,CXCL12,SPOCK2,GAB1,SMOC2,SEMA5A,SPARC,THBS4,FGF1,SELENOK,HYAL1,IGFBP5,AKT3,F3,NR4A3,RHOJ,KDR,PLVAP,POSTN,PDGFRA,AGT,CCL21,THBS1,SEMA6D,ITGAV,ANXA3,EGF,NTRK3,CYR61,ACKR3,SLIT2,CAMK2D,PDGFC,CXCL14,PLA2G7,HMCN2,ADRA2A,VEGFC,KIT,DMTN,IL6R,CXCL16,PLPP3,PDPN,DEFB1,VEGFD,ATOH8,PTAFR,CXCL8,PDGFD,INSR,CCL19,SLC8A1,CCB…
1	TRUE	1.13e-06	105	1124	30	0.027	0.286	GO:0042383	CC	sarcolemma	ATP1A2,ATP2B4,ABCC9,SGCA,STBD1,TGFB3,KCNJ8,POPDC2,SSPN,KCNJ2,COL6A2,CAMK2D,ANK2,MLIP,CACNA2D1,PGM5,KCNB1,VCAM1,SGCB,SGCD,KCND3,SNTB1,SNTG2,SLC2A4,BGN,SLC8A1,RYR1,LAMA2,DMD,AQP1
1	TRUE	1.22e-06	425	1124	73	0.065	0.172	GO:0042060	BP	wound healing	ENPP4,CX3CL1,DCN,IGF1,TNC,FGF10,FAP,B4GALT1,DOCK9,EPB41L4B,PDGFB,MYL9,WFDC1,KANK1,SGCA,SMOC2,LOX,SPARC,F3,TGFB3,SDC4,F13A1,SYT11,POSTN,PDGFRA,CD36,THBS1,MYOF,MMRN1,TPM1,CYR61,ITGA9,PHLDB2,PDGFC,AK3,GSN,SERPING1,ADRA2A,GJA1,GNA14,GNAQ,DMTN,TFF3,TFF1,PLPP3,PDPN,TGFA,COL1A2,SERPINF2,COL3A1,P2RY1,ZFPM2,PDGFD,C1GALT1C1,FGA,FGB,NDNF,C1QTNF1,CD34,A2M,THBD,PRKG1,PPARA,SERPINA5,SERPINA1,PAPSS2,F5,DMD,NOTC…
1	TRUE	1.35e-06	243	1124	50	0.044	0.206	GO:0005788	CC	endoplasmic reticulum lumen	TNC,H6PD,FSTL3,MGAT4A,PTGS2,COL5A3,P3H2,TF,PDGFB,CST3,CHRDL1,MSLN,EBI3,IGFBP5,CASQ2,SPP1,COL21A1,DNAJB9,HRC,COL4A2,RDH5,THBS1,ERP27,COL6A2,RCN3,CYR61,SUMF1,PDGFC,IGFBP3,PRSS23,SPARCL1,ADAMTS5,FSTL1,IGFBP7,COL1A2,COL3A1,SDC2,PDGFD,FGA,COL8A2,LAMB2,COL4A1,COL14A1,COL25A1,SERPINA1,F5,COL5A2,COL15A1,COL28A1,SPON1
1	TRUE	1.4e-06	112	1124	31	0.028	0.277	GO:0002576	BP	platelet degranulation	IGF1,ITIH4,TF,TIMP3,PDGFB,RARRES2,CDC37L1,PHACTR2,SPARC,TGFB3,CLU,F13A1,ISLR,CD36,THBS1,MMRN1,EGF,SERPING1,VEGFC,TTN,DMTN,CLEC3B,VEGFD,SERPINF2,FGA,FGB,A2M,SERPINA3,SERPINA1,F5,SELENOP
1	TRUE	1.44e-06	56	516	21	0.041	0.375	KEGG:04974	keg	Protein digestion and absorption	ATP1A2,ELN,KCNQ1,COL5A3,SLC1A1,SLC16A10,COL21A1,ATP1B2,COL4A2,FXYD2,COL6A2,CPB1,CPA3,COL1A2,COL3A1,KCNE3,SLC8A1,COL4A1,COL14A1,COL5A2,COL15A1
1	TRUE	1.73e-06	56	1124	21	0.019	0.375	GO:0097756	BP	negative regulation of blood vessel diameter	ATP1A2,PTGS2,HRH2,KCNA5,AGT,EDNRB,AGTR1,ADM,ADRA2A,EDNRA,GJA1,TMEM133,AVPR1A,PTAFR,FGA,FGB,SLC8A1,KCNMB2,BMPR2,GJA5,ADRA2B
1	TRUE	1.78e-06	25	1124	14	0.012	0.56	GO:0017046	MF	peptide hormone binding	GHR,NPR3,PRLR,VIPR1,INHBA,RAMP2,RAMP1,EDNRB,SLC40A1,CRHBP,NPR2,PTH1R,AVPR1A,INSR
1	TRUE	2e-06	388	1124	68	0.06	0.175	GO:0030335	BP	positive regulation of cell migration	TAC1,IGF1,SNAI2,LAMC2,FGF10,PTGS2,SEMA3C,CXCL2,WNT11,NOX4,EPB41L4B,PDGFB,RARRES2,CXCL12,GAB1,SMOC2,SEMA5A,SPARC,THBS4,FGF1,SELENOK,HYAL1,IGFBP5,AKT3,F3,NR4A3,RHOJ,KDR,PLVAP,POSTN,PDGFRA,AGT,CCL21,THBS1,SEMA6D,ITGAV,ANXA3,EGF,NTRK3,CYR61,ACKR3,CAMK2D,PDGFC,CXCL14,PLA2G7,HMCN2,ADRA2A,VEGFC,KIT,DMTN,IL6R,CXCL16,PLPP3,PDPN,VEGFD,ATOH8,PTAFR,CXCL8,PDGFD,INSR,CCL19,SLC8A1,CCBE1,FAM110C,NTF3,IRS2,LPAR1,…
1	TRUE	2.11e-06	209	1124	45	0.04	0.215	GO:0030336	BP	negative regulation of cell migration	CX3CL1,DCN,LIMCH1,WNT11,CHRD,ANGPT2,JAG1,WASL,MEOX2,KANK1,CXCL12,CCL2,PPARGC1A,IGFBP5,PADI2,LRP1,DLL4,PPARG,SERPINF1,CCL21,SULF1,THBS1,SEMA6D,TPM1,MYOCD,PTPRG,PHLDB2,SLIT2,SFRP2,IGFBP3,CCL28,STC1,CYGB,ADAMTS9,DLC1,TP53INP1,CD300A,COL3A1,LDLRAD4,PTGER4,PTPRM,PODN,PRKG1,ADGRG1,ARPIN
1	TRUE	2.12e-06	42	1124	18	0.016	0.429	GO:0019229	BP	regulation of vasoconstriction	ATP1A2,PTGS2,HRH2,KCNA5,AGT,AGTR1,ADM,ADRA2A,GJA1,TMEM133,AVPR1A,PTAFR,FGA,FGB,KCNMB2,BMPR2,GJA5,ADRA2B
1	TRUE	2.53e-06	57	1124	21	0.019	0.368	GO:0003073	BP	regulation of systemic arterial blood pressure	PCSK5,KCNK6,PDGFB,NCALD,POSTN,SPX,AGT,ENPEP,TPM1,AGTR1,ADM,GJA1,DDAH1,CPA3,TMEM133,AVPR1A,SERPINF2,AR,BMPR2,EMP2,GJA5
1	TRUE	3.1e-06	85	1124	26	0.023	0.306	GO:0035296	BP	regulation of tube diameter	ATP1A2,PTGS2,HRH2,RGS2,KCNA5,AGT,EDNRB,AGTR1,ADM,ADRA2A,EDNRA,GJA1,TMEM133,AVPR1A,SERPINF2,PTAFR,P2RY1,FGA,FGB,PTPRM,SLC8A1,PRKG1,KCNMB2,BMPR2,GJA5,ADRA2B
1	TRUE	3.1e-06	85	1124	26	0.023	0.306	GO:0097746	BP	regulation of blood vessel diameter	ATP1A2,PTGS2,HRH2,RGS2,KCNA5,AGT,EDNRB,AGTR1,ADM,ADRA2A,EDNRA,GJA1,TMEM133,AVPR1A,SERPINF2,PTAFR,P2RY1,FGA,FGB,PTPRM,SLC8A1,PRKG1,KCNMB2,BMPR2,GJA5,ADRA2B
1	TRUE	3.51e-06	435	1124	73	0.065	0.168	GO:0006935	BP	chemotaxis	CX3CL1,NGFR,NTN1,SPTB,FGF10,NTN4,SEMA3C,CXCL2,ANGPT2,DPYSL2,HSD3B7,PDGFB,DOK5,RARRES2,PLGRKT,CXCL12,CCL2,GAB1,SMOC2,SEMA5A,THBS4,FGF1,PADI2,F3,NR4A3,CSF3R,NR4A1,FFAR2,KDR,MATN2,CHL1,PDGFRA,EDNRB,CCL21,THBS1,CH25H,ITGAV,NTRK3,TNFRSF11A,CYR61,RAB13,ACKR3,ITGA9,BOC,AGTR1,SLIT2,CXCL14,PLA2G7,VEGFC,CCL28,GFRA1,KIT,SPON2,IL6R,CXCL16,VCAM1,DEFB1,VEGFD,EFNA1,PTAFR,CXCL8,PDGFD,LAMB2,CCL19,CYP7B1,PTPRM,SLI…
1	TRUE	3.9e-06	436	1124	73	0.065	0.167	GO:0042330	BP	taxis	CX3CL1,NGFR,NTN1,SPTB,FGF10,NTN4,SEMA3C,CXCL2,ANGPT2,DPYSL2,HSD3B7,PDGFB,DOK5,RARRES2,PLGRKT,CXCL12,CCL2,GAB1,SMOC2,SEMA5A,THBS4,FGF1,PADI2,F3,NR4A3,CSF3R,NR4A1,FFAR2,KDR,MATN2,CHL1,PDGFRA,EDNRB,CCL21,THBS1,CH25H,ITGAV,NTRK3,TNFRSF11A,CYR61,RAB13,ACKR3,ITGA9,BOC,AGTR1,SLIT2,CXCL14,PLA2G7,VEGFC,CCL28,GFRA1,KIT,SPON2,IL6R,CXCL16,VCAM1,DEFB1,VEGFD,EFNA1,PTAFR,CXCL8,PDGFD,LAMB2,CCL19,CYP7B1,PTPRM,SLI…
1	TRUE	4.21e-06	92	1124	27	0.024	0.293	GO:0035150	BP	regulation of tube size	ATP1A2,PTGS2,HRH2,RGS2,KCNA5,AGT,EDNRB,AGTR1,ADM,ADRA2A,EDNRA,GJA1,TMEM133,AVPR1A,SERPINF2,PTAFR,P2RY1,FGA,FGB,PTPRM,SLC8A1,PRKG1,KCNMB2,BMPR2,HBB,GJA5,ADRA2B
1	TRUE	4.21e-06	92	1124	27	0.024	0.293	GO:0050880	BP	regulation of blood vessel size	ATP1A2,PTGS2,HRH2,RGS2,KCNA5,AGT,EDNRB,AGTR1,ADM,ADRA2A,EDNRA,GJA1,TMEM133,AVPR1A,SERPINF2,PTAFR,P2RY1,FGA,FGB,PTPRM,SLC8A1,PRKG1,KCNMB2,BMPR2,HBB,GJA5,ADRA2B
1	TRUE	4.27e-06	420	1124	71	0.063	0.169	GO:0043269	BP	regulation of ion transport	ABCB4,CX3CL1,ATP1A2,KCNQ1,ATP2B4,MAOB,PTPN3,PTGS2,ADCYAP1R1,ABCB1,FXYD3,TF,JPH4,DPYSL2,KCNK6,PDGFB,CA2,CXCL12,CCL2,PPARGC1A,CLIC5,RGS2,CNR1,AKAP7,CASQ2,KCNJ8,CRY2,RAMP3,KCNJ2,HSPA2,ATP1B2,KCNA5,HRC,RGN,APLNR,AGT,SCN7A,FXYD2,THBS1,EGF,TNFRSF11A,OSR1,CAMK2D,ANK2,CRHBP,JPH2,ADRA2A,GJA1,PLA2R1,CNKSR3,CACNA2D1,KCNB1,PINK1,STC1,CLIC6,AVPR1A,PTAFR,P2RY1,KCND3,SNCG,KCNE3,SCN4B,SLC8A1,PARK2,KCNIP4,IRS2,PL…
1	TRUE	4.37e-06	221	1124	46	0.041	0.208	GO:2000146	BP	negative regulation of cell motility	CX3CL1,DCN,LIMCH1,WNT11,CHRD,ANGPT2,JAG1,WASL,MEOX2,KANK1,CXCL12,CCL2,PPARGC1A,IGFBP5,PADI2,LRP1,DLL4,RGN,PPARG,SERPINF1,CCL21,SULF1,THBS1,SEMA6D,TPM1,MYOCD,PTPRG,PHLDB2,SLIT2,SFRP2,IGFBP3,CCL28,STC1,CYGB,ADAMTS9,DLC1,TP53INP1,CD300A,COL3A1,LDLRAD4,PTGER4,PTPRM,PODN,PRKG1,ADGRG1,ARPIN
1	TRUE	4.68e-06	185	1124	41	0.036	0.222	GO:0007160	BP	cell-matrix adhesion	CX3CL1,EPHA3,ARHGAP6,LIMCH1,ITGA8,COL5A3,NID2,SORBS1,JAG1,MSLN,ECM2,ITGB6,NID1,CTGF,SDC4,KDR,ITGB4,POSTN,CD36,ITGA7,CCL21,THBS1,ITGA11,ITGAV,PPFIA2,FBLN5,PHLDB2,VEGFC,CCL28,DMTN,VCAM1,ADAMTS9,DLC1,COL3A1,NPNT,FGA,FGB,CD34,S100A10,DMD,EMP2
1	TRUE	5.1e-06	237	1124	48	0.043	0.203	GO:0051271	BP	negative regulation of cellular component movement	CX3CL1,DCN,LIMCH1,WNT11,CHRD,ANGPT2,JAG1,WASL,MEOX2,KANK1,CXCL12,CCL2,PPARGC1A,SEMA5A,IGFBP5,PADI2,LRP1,DLL4,RGN,PPARG,SERPINF1,CCL21,SULF1,THBS1,SEMA6D,TPM1,MYOCD,PTPRG,PHLDB2,SLIT2,SFRP2,IGFBP3,CCL28,STC1,CYGB,ADAMTS9,DLC1,TP53INP1,CD300A,COL3A1,LDLRAD4,PTGER4,PTPRM,PODN,KCNE3,PRKG1,ADGRG1,ARPIN
1	TRUE	5.35e-06	70	516	23	0.045	0.329	KEGG:05414	keg	Dilated cardiomyopathy (DCM)	IGF1,ITGA8,SGCA,ITGB6,TNNT2,TGFB3,ADCY4,ITGB4,ITGA7,ITGA11,ITGAV,TPM1,ITGA9,CACNA2D1,TTN,MYL3,SGCB,SGCD,SLC8A1,LAMA2,TPM2,PLN,DMD
1	TRUE	5.6e-06	54	1124	20	0.018	0.37	GO:0005518	MF	collagen binding	DCN,COL5A3,NID2,PDGFB,COMP,ECM2,SPARC,NID1,THBS1,ITGA11,LUM,ITGA9,SPARCL1,PCOLCE2,ANTXR1,C1QTNF1,PODN,CCBE1,COL14A1,ADGRG1
1	TRUE	7.82e-06	66	516	22	0.043	0.333	KEGG:05410	keg	Hypertrophic cardiomyopathy (HCM)	IGF1,ITGA8,SGCA,ITGB6,TNNT2,TGFB3,ITGB4,ITGA7,ITGA11,ITGAV,TPM1,ITGA9,CACNA2D1,TTN,MYL3,PRKAA2,SGCB,SGCD,SLC8A1,LAMA2,TPM2,DMD
1	TRUE	8.49e-06	295	1124	55	0.049	0.186	GO:0070482	BP	response to oxygen levels	PTGS2,NOX4,MMP2,ANGPT2,CST3,CXCL12,SOD3,PPARGC1A,CRYAB,CTGF,FOXO3,TGFB3,PTGIS,HIF3A,EGLN3,KCNA5,COX4I2,RAMP2,PPARG,POSTN,TLR2,THBS1,MYOCD,CAMK2D,PAM,ADM,VEGFC,FOXO1,EDNRA,PLOD2,NR4A2,DDAH1,PINK1,STC1,S100B,CYGB,VCAM1,VEGFD,AQP3,ANGPTL4,NDNF,CD34,HIGD1A,SLC2A4,SLC8A1,ZFP36L1,PPARA,RYR1,LPAR1,MB,MT-CYB,MT-ND5,MT-ND4,MT-ATP6,AQP1
1	TRUE	9.54e-06	288	1124	54	0.048	0.188	GO:0010469	BP	regulation of signaling receptor activity	CRLF1,CX3CL1,IGF1,FGF10,CXCL2,PDGFB,JAG1,EBI3,CXCL12,CCL2,PPARGC1A,THBS4,FGF1,CTGF,SPP1,TGFB3,INHBA,RAMP3,KL,NGF,SPX,AGT,CCL21,EGF,WNT9A,THNSL2,SFRP2,PDGFC,CRHBP,CXCL14,ADM,ADRA2A,VEGFC,CCL28,PINK1,STC1,TFF1,SCGB3A1,CXCL16,TGFA,HEYL,TNFRSF11B,VEGFD,CXCL8,NRG4,P2RY1,PDGFD,SOCS5,IL17D,CCL19,BTC,LYNX1,NTF3,SHANK3
1	TRUE	1.66e-05	110	1124	29	0.026	0.264	GO:0019838	MF	growth factor binding	NGFR,PDGFB,LIFR,IGFBP5,CTGF,TGFB3,KDR,TWSG1,ITGB4,KL,PDGFRA,CD36,THBS1,ITGAV,NTRK3,CYR61,IGFBP3,NTRK2,IL6R,IGFBP7,COL1A2,IGFBP6,COL3A1,HTRA3,INSR,A2M,COL4A1,S100A13,BMPR2
1	TRUE	1.67e-05	215	1124	44	0.039	0.205	GO:0048018	MF	receptor ligand activity	CRLF1,CX3CL1,IGF1,FGF10,CXCL2,PDGFB,JAG1,EBI3,CXCL12,CCL2,THBS4,FGF1,CTGF,SPP1,TGFB3,INHBA,KL,NGF,SPX,AGT,CCL21,EGF,WNT9A,THNSL2,SFRP2,PDGFC,CXCL14,ADM,VEGFC,CCL28,STC1,TFF1,SCGB3A1,CXCL16,TGFA,TNFRSF11B,VEGFD,CXCL8,NRG4,PDGFD,IL17D,CCL19,BTC,NTF3
1	TRUE	1.76e-05	42	1124	17	0.015	0.405	GO:0044420	CC	extracellular matrix component	ELN,LAMC2,COL5A3,COL4A2,LUM,FBLN5,COL1A2,TNXB,COL3A1,LAMB2,COL4A1,THSD4,COL14A1,LAMB3,MFAP5,COL5A2,COL15A1
1	TRUE	1.89e-05	137	1124	33	0.029	0.241	GO:0045766	BP	positive regulation of angiogenesis	HSPB6,CX3CL1,C6,PTGS2,ANGPT2,GAB1,SMOC2,SEMA5A,FGF1,HYAL1,AKT3,F3,PTGIS,RHOJ,KDR,RAMP2,APLNR,THBS1,ANXA3,AGTR1,SFRP2,ADAM12,ADM,VEGFC,DDAH1,BMPER,VEGFD,ANGPTL4,CXCL8,LRG1,CD34,CCBE1,AQP1
1	TRUE	1.95e-05	172	1124	38	0.034	0.221	GO:0004930	MF	G-protein coupled receptor activity	PTGER3,ADGRF5,ADCYAP1R1,PDGFRL,NPR3,HRH2,VIPR1,CNR1,PTGFR,RAMP3,FFAR2,RAMP2,PPARG,RAMP1,APLNR,EDNRB,ACKR3,AGTR1,SFRP2,ADRA2A,EDNRA,FZD1,PTH1R,ADGRL4,OXER1,HPGD,NPY1R,AVPR1A,GPRC5B,PTAFR,P2RY1,PTGER4,MRGPRF,FZD4,LPAR1,ADGRG1,ACKR1,ADRA2B
1	TRUE	2e-05	80	1124	24	0.021	0.3	GO:0031091	CC	platelet alpha granule	IGF1,PDGFB,PHACTR2,SPARC,TGFB3,CLU,F13A1,ISLR,CD36,THBS1,MMRN1,EGF,SERPING1,VEGFC,VEGFD,SERPINF2,FGA,FGB,A2M,THBS2,SERPINA5,SERPINA3,SERPINA1,F5
1	TRUE	2.34e-05	58	1124	20	0.018	0.345	GO:0031093	CC	platelet alpha granule lumen	IGF1,PDGFB,SPARC,TGFB3,CLU,F13A1,ISLR,THBS1,MMRN1,EGF,SERPING1,VEGFC,VEGFD,SERPINF2,FGA,FGB,A2M,SERPINA3,SERPINA1,F5
1	TRUE	2.36e-05	145	1124	34	0.03	0.234	GO:0015850	BP	organic hydroxy compound transport	ABCB4,TAC1,MSR1,MAOB,ATP8B1,NCOA1,PLTP,CXCL12,ABCC3,CNR1,SPP1,CLU,LRP1,PPARG,CD36,AGT,SLCO2B1,RBP4,EGF,AGTR1,SLC22A3,ADRA2A,ABCA5,KCNB1,PINK1,ABCA1,AQP7,AQP3,P2RY1,SNCG,C1QTNF1,PARK2,AQP1,ADRA2B
1	TRUE	2.37e-05	248	1124	48	0.043	0.194	GO:0040013	BP	negative regulation of locomotion	CX3CL1,DCN,LIMCH1,WNT11,CHRD,ANGPT2,JAG1,WASL,MEOX2,KANK1,CXCL12,CCL2,PPARGC1A,SEMA5A,ARRDC3,IGFBP5,PADI2,LRP1,DLL4,RGN,PPARG,SERPINF1,CCL21,SULF1,THBS1,SEMA6D,TPM1,MYOCD,PTPRG,PHLDB2,SLIT2,SFRP2,IGFBP3,CCL28,STC1,CYGB,ADAMTS9,DLC1,TP53INP1,CD300A,COL3A1,LDLRAD4,PTGER4,PTPRM,PODN,PRKG1,ADGRG1,ARPIN
1	TRUE	2.43e-05	99	1124	27	0.024	0.273	GO:0007188	BP	adenylate cyclase-modulating G-protein coupled receptor signaling pathway	ATP2B4,RGS1,ARRDC3,NPR3,RGS2,CNR1,RAMP3,GNAI1,ADCY4,RAMP2,RAMP1,GNAL,ADM,ADRA2A,EDNRA,GNA14,GNAQ,PTH1R,OXER1,NPY1R,ABCA1,P2RY1,PTGER4,PDE2A,LPAR1,PLN,ADRA2B
1	TRUE	2.56e-05	93	1124	26	0.023	0.28	GO:0003014	BP	renal system process	TAC1,KCNQ1,ADGRF5,PCSK5,PDGFB,NPR3,ADCY4,SPX,AGT,EDNRB,SULF1,AGTR1,GSN,ADM,GJA1,STC1,AQP3,AVPR1A,SERPINF2,AQP4,CD34,BTC,EMP2,AQP1,HBB,GJA5
1	TRUE	2.84e-05	265	1124	50	0.044	0.189	GO:0001666	BP	response to hypoxia	PTGS2,NOX4,MMP2,ANGPT2,CST3,CXCL12,SOD3,PPARGC1A,CRYAB,FOXO3,TGFB3,PTGIS,HIF3A,EGLN3,KCNA5,COX4I2,RAMP2,POSTN,TLR2,THBS1,MYOCD,CAMK2D,PAM,ADM,VEGFC,EDNRA,PLOD2,NR4A2,DDAH1,PINK1,STC1,S100B,CYGB,VCAM1,VEGFD,AQP3,ANGPTL4,NDNF,CD34,HIGD1A,SLC2A4,SLC8A1,ZFP36L1,PPARA,RYR1,MB,MT-CYB,MT-ND5,MT-ND4,AQP1
1	TRUE	3.22e-05	197	1124	41	0.036	0.208	GO:0060326	BP	cell chemotaxis	CX3CL1,CXCL2,HSD3B7,PDGFB,RARRES2,CXCL12,CCL2,GAB1,SMOC2,SEMA5A,THBS4,FGF1,PADI2,CSF3R,NR4A1,FFAR2,KDR,PDGFRA,EDNRB,CCL21,THBS1,CH25H,TNFRSF11A,RAB13,ITGA9,AGTR1,SLIT2,CXCL14,PLA2G7,VEGFC,CCL28,KIT,IL6R,CXCL16,VCAM1,VEGFD,CXCL8,PDGFD,CCL19,CYP7B1,LPAR1
1	TRUE	3.27e-05	274	1124	51	0.045	0.186	GO:0036293	BP	response to decreased oxygen levels	PTGS2,NOX4,MMP2,ANGPT2,CST3,CXCL12,SOD3,PPARGC1A,CRYAB,CTGF,FOXO3,TGFB3,PTGIS,HIF3A,EGLN3,KCNA5,COX4I2,RAMP2,POSTN,TLR2,THBS1,MYOCD,CAMK2D,PAM,ADM,VEGFC,EDNRA,PLOD2,NR4A2,DDAH1,PINK1,STC1,S100B,CYGB,VCAM1,VEGFD,AQP3,ANGPTL4,NDNF,CD34,HIGD1A,SLC2A4,SLC8A1,ZFP36L1,PPARA,RYR1,MB,MT-CYB,MT-ND5,MT-ND4,AQP1
1	TRUE	3.75e-05	198	1124	41	0.036	0.207	GO:0072593	BP	reactive oxygen species metabolic process	SLC7A2,PDK4,ATP2B4,MAOB,PTGS2,NOX4,PDGFB,PON3,SOD3,CRYAB,PRDX6,CTGF,FOXO3,CLU,PTGIS,RIPK3,RGN,CD36,AGT,TLR2,THBS1,FBLN5,CYR61,AGTR1,MMP3,FOXO1,PLA2R1,DDAH1,MPV17L,PINK1,INSR,CD34,PARK2,TLR5,BCO2,MT-CO2,MT-ND2,GPX3,PLIN5,HBB,HP
1	TRUE	3.77e-05	176	1124	38	0.034	0.216	GO:0043292	CC	contractile fiber	MYOM2,ATP2B4,ABCC9,PPP1R12B,MMP2,MYL9,CST3,CRYAB,TNNT2,CASQ2,KCNJ8,LRRC39,CALD1,SDC4,KCNA5,HRC,TPM1,ANK2,JPH2,DST,GJA1,PGM5,PDLIM3,TTN,TIMP4,MYL3,LMOD1,CMYA5,NPNT,SYNPO,MYOZ1,SLC8A1,RYR1,SVIL,TPM2,DMD,KLHL41,MYZAP
1	TRUE	5.4e-05	377	1124	63	0.056	0.167	GO:0098797	CC	plasma membrane protein complex	IGF1,ATP1A2,C6,KCNQ1,ABCC9,ITGA8,NOX4,TF,SORBS1,KCNK6,SGCA,LIN7A,C7,ITGB6,KCNJ8,RAMP3,SSPN,LRP1,KCNJ2,HSPA2,GNAI1,ATP1B2,KCNA5,RAMP2,RAMP1,ITGB4,ITGA7,SCN7A,TLR2,FXYD2,ITGA11,ITGAV,GNAL,HSPG2,ITGA9,MPP7,GJA1,CACNA2D1,PGM5,GNA14,GNAQ,KCNB1,IL6R,VCAM1,SGCB,NPNT,SGCD,INSR,KCND3,SNTB1,SNTG2,KCNE3,SCN4B,KCNIP4,GJA4,BTBD8,RYR1,KCNMB2,DMD,VAMP2,GNG10,DNAJC25-GNG10,GJA5
1	TRUE	5.49e-05	231	1124	45	0.04	0.195	GO:0030545	MF	receptor regulator activity	CRLF1,CX3CL1,IGF1,FGF10,CXCL2,PDGFB,JAG1,EBI3,CXCL12,CCL2,THBS4,FGF1,CTGF,SPP1,TGFB3,INHBA,KL,NGF,SPX,AGT,CCL21,EGF,WNT9A,THNSL2,SFRP2,PDGFC,CXCL14,ADM,VEGFC,CCL28,STC1,TFF1,SCGB3A1,CXCL16,TGFA,TNFRSF11B,VEGFD,CXCL8,NRG4,PDGFD,IL17D,CCL19,BTC,LYNX1,NTF3
1	TRUE	7.86e-05	124	1124	30	0.027	0.242	GO:0015893	BP	drug transport	SLC7A2,ABCB4,ATP1A2,SLC1A3,ATP8B1,ABCB1,CA2,SLC17A7,SLC1A1,CXCL12,ABCC3,TMEM30A,RGS2,SLC19A2,CNR1,INHBA,TCN1,AGT,SLC19A3,SLC22A3,GJA1,PINK1,CYGB,SNCG,FZD4,TCN2,PARK2,MB,AQP1,HBB
1	TRUE	9.58e-05	212	1124	42	0.037	0.198	GO:0032103	BP	positive regulation of response to external stimulus	TAC1,CX3CL1,PTGER3,FGF10,PTGS2,CXCL2,PDGFB,RARRES2,CXCL12,SMOC2,SEMA5A,THBS4,F3,CNR1,FFAR2,KDR,AGT,CCL21,TLR2,THBS1,NTRK3,TNFRSF11A,AGTR1,SLIT2,CXCL14,PLA2G7,VEGFC,IL6R,VEGFD,GPRC5B,SERPINF2,CXCL8,PDGFD,PTGER4,IL17D,CCL19,LPL,THBD,NTF3,PDE2A,LPAR1,BMPR2
1	TRUE	0.000103	34	516	14	0.027	0.412	KEGG:00982	keg	Drug metabolism - cytochrome P450	FMO3,MGST1,MAOB,FMO4,FMO2,FMO5,AOX1,MGST3,HPGDS,ADH1A,MAOA,ADH1B,GSTA1,ADH1C
1	TRUE	0.000104	308	1124	54	0.048	0.175	GO:0032970	BP	regulation of actin filament-based process	TAC1,CX3CL1,ATP1A2,EPHA3,ARHGAP6,ELN,NCKAP1,LIMCH1,SPTB,WNT11,NOX4,WASL,KANK1,CXCL12,SEMA5A,TNNT2,CTGF,TGFB3,SORBS3,LRP1,KCNJ2,SDC4,DSTN,PDGFRA,CCL21,TPM1,NTRK3,PHLDB2,SLIT2,CAMK2D,ANK2,PAM,GSN,JMY,DMTN,STC1,PDPN,LMOD1,DLC1,CDC42EP5,SERPINF2,PTGER4,SYNPO,KCNE3,PARK2,NTF3,S100A10,LPAR1,PLN,ARHGEF15,ARPIN,SHANK3,BRK1,GJA5
1	TRUE	0.000111	268	1124	49	0.044	0.183	GO:0001101	BP	response to acid chemical	PDK4,ABCB4,TNC,EPHA3,ATP2B4,PTGS2,WNT11,HSD17B2,MMP2,PDGFB,PPARGC1A,SPARC,CTGF,PTGFR,FFAR2,KDR,CDO1,PPARG,SERPINF1,CD36,CCL21,TLR2,RBP4,NTRK3,WNT9A,OSR1,PDGFC,NTRK2,GSN,FOXO1,GJA1,RRAGA,PINK1,PRKAA2,IGFBP7,COL1A2,ABCA1,AQP3,AVPR1A,COL3A1,PTAFR,PDGFD,PTGER4,CCL19,FZD4,COL4A1,DMD,COL5A2,AQP1
1	TRUE	0.000127	37	1124	15	0.013	0.405	GO:0086009	BP	membrane repolarization	ATP1A2,KCNQ1,AKAP7,CASQ2,KCNJ8,KCNJ2,ATP1B2,KCNA5,ANK2,GJA1,CACNA2D1,KCND3,KCNE3,SCN4B,GJA5
1	TRUE	0.00013	100	1124	26	0.023	0.26	GO:0005178	MF	integrin binding	CX3CL1,IGF1,FAP,ECM2,CXCL12,THBS4,FGF1,ITGB6,CTGF,KDR,ADAMTS8,THBS1,ITGAV,FBLN5,CYR61,SFRP2,DST,ADAMTS5,VCAM1,EDIL3,TNXB,COL3A1,NPNT,LAMB2,DMD,EMP2
1	TRUE	0.000154	24	1124	12	0.011	0.5	GO:0030020	MF	extracellular matrix structural constituent conferring tensile strength	COL5A3,COL21A1,COL4A2,COL6A2,COL1A2,COL3A1,COL8A2,COL4A1,COL14A1,COL5A2,COL15A1,COL28A1
1	TRUE	0.000157	35	516	14	0.027	0.4	KEGG:05144	keg	Malaria	COMP,CCL2,THBS4,TGFB3,LRP1,CD36,TLR2,THBS1,VCAM1,CXCL8,SDC2,THBS2,ACKR1,HBB
1	TRUE	0.000162	82	1124	23	0.02	0.28	GO:0061337	BP	cardiac conduction	ATP1A2,KCNQ1,ATP2B4,KCNK6,CASQ2,KCNJ2,ATP1B2,KCNA5,HRC,AGT,CAMK2D,ANK2,GJA1,CACNA2D1,NPR2,TMEM65,KCND3,KCNE3,SCN4B,SLC8A1,RYR1,PLN,GJA5
1	TRUE	0.000214	71	1124	21	0.019	0.296	GO:0006939	BP	smooth muscle contraction	ATP1A2,PTGER3,PTGS2,RGS2,CNN1,SPX,AGT,EDNRB,SULF1,PLCE1,MYOCD,HMCN2,ADRA2A,EDNRA,KIT,TMEM133,NPNT,PTAFR,SLC8A1,PRKG1,ADRA2B
1	TRUE	0.000236	173	1124	36	0.032	0.208	GO:0010810	BP	regulation of cell-substrate adhesion	CX3CL1,EPHA3,ARHGAP6,LIMCH1,ANGPT2,JAG1,AGR2,ECM2,KANK1,SPOCK2,SMOC2,NID1,SDC4,KDR,POSTN,CD36,CCL21,THBS1,CYR61,PHLDB2,VEGFC,CCL28,DMTN,PDPN,FBLN2,EDIL3,EGFLAM,DLC1,NPNT,FGA,FGB,NDNF,FZD4,S100A10,DMD,EMP2
1	TRUE	0.000245	90	1124	24	0.021	0.267	GO:0019933	BP	cAMP-mediated signaling	ATP2B4,ADCYAP1R1,RAPGEF4,ARRDC3,RGS2,RAMP3,GNAI1,ADCY4,RAMP2,RAMP1,APLNR,GNAL,EIF4EBP2,ADM,ADRA2A,GNAQ,PTH1R,DEFB1,ABCA1,PDE3A,PDE2A,LPAR1,PLN,ADRA2B
1	TRUE	0.000248	103	1124	26	0.023	0.252	GO:0060048	BP	cardiac muscle contraction	ATP1A2,KCNQ1,RGS2,TNNT2,CTGF,CASQ2,KCNJ8,KCNJ2,KCNA5,HRC,PDE5A,TPM1,CAMK2D,ANK2,GJA1,CACNA2D1,TTN,STC1,MYL3,KCND3,KCNE3,SCN4B,SLC8A1,PLN,DMD,GJA5
1	TRUE	0.000256	367	1124	60	0.053	0.163	GO:0034762	BP	regulation of transmembrane transport	CX3CL1,IGF1,ATP1A2,KCNQ1,ATP2B4,NGFR,PTPN3,ABCB1,FXYD3,JPH4,SORBS1,KCNK6,CA2,RARRES2,PPARGC1A,CLIC5,RGS2,AKAP7,CASQ2,NR4A3,KCNJ8,RAMP3,KCNJ2,HSPA2,ATP1B2,KCNA5,HRC,RGN,APLNR,AGT,SCN7A,FXYD2,THBS1,OSR1,CAMK2D,ANK2,CRHBP,JPH2,ADRA2A,EDNRA,GJA1,CACNA2D1,KCNB1,PINK1,CLIC6,KLF15,PTAFR,INSR,KCND3,KCNE3,SCN4B,SLC8A1,KCNIP4,IRS2,ENPP1,PLN,DMD,VAMP2,SHANK3,GJA5
1	TRUE	0.000266	300	1124	52	0.046	0.173	GO:0001503	BP	ossification	TAC1,LTF,IGF1,SNAI2,TNC,CHRDL2,FSTL3,PTGS2,WNT11,MMP2,CHRD,JAG1,CHRDL1,ZBTB16,SPARC,IGFBP5,CTGF,SPP1,TGFB3,OMD,LRRC17,TWSG1,KL,ITGA11,CDH11,TOB1,TNFRSF11A,CYR61,OSR1,SFRP2,IGFBP3,IGSF10,GJA1,SLC26A2,FZD1,STC1,NPR2,IL6R,PTH1R,DHRS3,CLEC3B,CTHRC1,NPNT,SIX2,PTGER4,TMEM64,SLC8A1,FAT4,RYR1,ENPP1,BMPR2,COL5A2
1	TRUE	0.000267	110	1124	27	0.024	0.245	GO:0030048	BP	actin filament-based movement	ATP1A2,KCNQ1,WASL,MLPH,TNNT2,KCNJ8,KCNJ2,KCNA5,MYO7A,TPM1,CAMK2D,ANK2,GJA1,CACNA2D1,TTN,STC1,MYL3,PDPN,MYRIP,KCND3,KCNE3,SCN4B,TPM2,PLN,DMD,EMP2,GJA5
1	TRUE	0.000299	456	1124	70	0.062	0.154	GO:0007507	BP	heart development	IGF1,SNAI2,ELN,SEMA3C,RARB,WNT11,NOX4,PCSK5,PDGFB,JAG1,RBM24,LOX,SPARC,RGS2,TNNT2,KCNJ8,BICC1,DLL4,OLFM1,RAMP2,PPARG,APLNR,PDGFRA,HEY2,AGT,PLCE1,RBP4,TPM1,NTRK3,MYOCD,CYR61,OSR1,SLIT2,CAMK2D,ANK2,SFRP2,PAM,ADM,JPH2,EDNRA,GJA1,TTN,GNAQ,FZD1,MYL3,DHRS3,VCAM1,SGCB,ADAMTS9,HEYL,NPY1R,SOX17,DLC1,TMEM65,TMEM100,COL3A1,EFNA1,ZFPM2,SGCD,INSR,SLC8A1,SLIT3,ZFP36L1,PPARA,FAT4,RYR1,MB,PLN,BMPR2,GJA5
1	TRUE	0.000307	91	1124	24	0.021	0.264	GO:0062013	BP	positive regulation of small molecule metabolic process	IGF1,PTGS2,ADCYAP1R1,SORBS1,PDGFB,PPARGC1A,FGF1,NR4A3,RGN,PPARG,EGF,FOXO1,PINK1,PTH1R,PRKAA2,AVPR1A,GPD1,PTAFR,P2RY1,INSR,IRS2,PPARA,MT-CO2,PLIN5
1	TRUE	0.000377	246	1124	45	0.04	0.183	GO:0072001	BP	renal system development	CRLF1,DCN,FGF10,FSTL3,RARB,ITGA8,WNT11,ANGPT2,PCSK5,PDGFB,JAG1,CA2,ZBTB16,FGF1,NID1,KCNJ8,SDC4,RGN,SERPINF1,ITGB4,PDGFRA,AGT,SULF1,PLCE1,RBP4,ENPEP,MYOCD,OSR1,AGTR1,SLIT2,KLF15,HEYL,HPGD,BMPER,SOX17,NPNT,EMX2,SIX2,PDGFD,PYGO1,LAMB2,CD34,GCNT4,COL4A1,FAT4
1	TRUE	0.000395	312	1124	53	0.047	0.17	GO:0048545	BP	response to steroid hormone	ATP1A2,LMO3,PLPP1,MAOB,PTGS2,RARB,NCOA1,SOX10,CA2,PPARGC1A,GHR,LOX,SPARC,PADI2,CTGF,FOXO3,SPP1,NR4A3,TGFB3,CRY2,NR4A1,CDO1,RAMP2,PPARG,SERPINF1,TLR2,THBS1,ANXA3,NTRK3,SLIT2,PAM,ADM,FOXO1,THRB,NR3C2,ZFP36L2,NR4A2,STC1,S100B,AGL,IGFBP7,HEYL,AVPR1A,AR,PTAFR,CYP7B1,FIBIN,NRIP1,SLIT3,ZFP36L1,PPARA,KANK2,AQP1
1	TRUE	0.000426	35	1124	14	0.012	0.4	GO:0005044	MF	scavenger receptor activity	MSR1,LRP1,CD36,LOXL4,SCARB2,TINAGL1,ACKR3,COLEC12,TMPRSS3,CXCL16,SBSPON,CD163,CD163L1,ENPP1
1	TRUE	0.000455	373	1124	60	0.053	0.161	GO:0050878	BP	regulation of body fluid levels	ENPP4,TAC1,FGF10,FAP,DOCK9,PDGFB,MYL9,AGR2,NPR3,PRLR,F3,SOCS2,F13A1,ADCY4,CDO1,APLNR,PDGFRA,CD36,EDNRB,SYTL2,THBS1,MMRN1,PDGFC,PAM,AK3,ADM,SERPING1,ADRA2A,GJA1,GNA14,GNAQ,DMTN,PDPN,COL1A2,AQP3,SERPINF2,COL3A1,P2RY1,ZFPM2,PDGFD,C1GALT1C1,FGA,FGB,AQP4,C1QTNF1,CD34,BTC,A2M,THBD,PRKG1,SERPINA5,SERPINA1,PAPSS2,MT-CO2,F5,EMP2,AQP1,HBB,GJA5,ADRA2B
1	TRUE	0.000473	26	1124	12	0.011	0.462	GO:0006953	BP	acute-phase response	PTGER3,ITIH4,PTGS2,CNR1,EDNRB,TNFRSF11A,IL6R,SERPINF2,CD163,SERPINA3,SERPINA1,HP
1	TRUE	0.000493	163	1124	34	0.03	0.209	GO:0030016	CC	myofibril	MYOM2,ATP2B4,ABCC9,PPP1R12B,MMP2,CRYAB,TNNT2,CASQ2,KCNJ8,LRRC39,CALD1,SDC4,KCNA5,HRC,TPM1,ANK2,JPH2,DST,PGM5,PDLIM3,TTN,TIMP4,MYL3,LMOD1,CMYA5,SYNPO,MYOZ1,SLC8A1,RYR1,SVIL,TPM2,DMD,KLHL41,MYZAP
1	TRUE	0.000554	194	1124	38	0.034	0.196	GO:0051480	BP	regulation of cytosolic calcium ion concentration	TAC1,CX3CL1,ATP1A2,ATP2B4,ADCYAP1R1,JPH4,CASQ2,RAMP3,KCNA5,HRC,APLNR,PDGFRA,CD36,AGT,EDNRB,CCL21,PLCE1,ITGAV,AGTR1,CAMK2D,ANK2,ADM,JPH2,EDNRA,GJA1,CACNA2D1,PTH1R,AVPR1A,P2RY1,CALB2,CCL19,C1QTNF1,TMEM64,SLC8A1,RYR1,LPAR1,PLN,DMD
1	TRUE	0.000574	164	1124	34	0.03	0.207	GO:0044449	CC	contractile fiber part	MYOM2,ATP2B4,ABCC9,PPP1R12B,MMP2,MYL9,CRYAB,TNNT2,CASQ2,LRRC39,SDC4,KCNA5,HRC,TPM1,ANK2,JPH2,DST,PGM5,PDLIM3,TTN,TIMP4,MYL3,LMOD1,CMYA5,NPNT,SYNPO,MYOZ1,SLC8A1,RYR1,SVIL,TPM2,DMD,KLHL41,MYZAP
1	TRUE	0.000586	135	1124	30	0.027	0.222	GO:0010594	BP	regulation of endothelial cell migration	DCN,PTGS2,ANGPT2,PDGFB,MEOX2,SMOC2,SEMA5A,SPARC,FGF1,AKT3,RHOJ,KDR,DLL4,PPARG,SERPINF1,AGT,THBS1,ANXA3,SLIT2,VEGFC,STC1,PLPP3,ADAMTS9,BMPER,ATOH8,EFNA1,PTPRM,CCBE1,BMPR2,EMP2
1	TRUE	0.000644	275	1124	48	0.043	0.175	GO:0001655	BP	urogenital system development	CRLF1,DCN,TNC,FGF10,FSTL3,RARB,ITGA8,WNT11,ANGPT2,PCSK5,PDGFB,JAG1,CA2,ZBTB16,FGF1,NID1,KCNJ8,SDC4,RGN,SERPINF1,ITGB4,PDGFRA,AGT,SULF1,PLCE1,RBP4,ENPEP,MYOCD,OSR1,AGTR1,SLIT2,KLF15,HEYL,HPGD,BMPER,SOX17,NPNT,AR,EMX2,SIX2,PDGFD,PYGO1,LAMB2,CYP7B1,CD34,GCNT4,COL4A1,FAT4
1	TRUE	0.000732	95	1124	24	0.021	0.253	GO:0005506	MF	iron ion binding	LTF,FTL,P3H2,TF,PHYH,PTGIS,EGLN3,CDO1,CYP2J2,ISCA1,CYP27A1,CH25H,AOX1,CYP11A1,FTO,CYP4B1,CYP39A1,PLOD2,CYP2U1,CYGB,HAAO,FAXDC2,CYP7B1,CYP4X1
1	TRUE	0.000753	177	516	36	0.07	0.203	KEGG:04510	keg	Focal adhesion	IGF1,TNC,LAMC3,LAMC2,PPP1R12B,ITGA8,PDGFB,MYL9,COMP,THBS4,ITGB6,AKT3,SPP1,CCND2,KDR,ITGB4,PDGFRA,COL4A2,ITGA7,THBS1,ITGA11,ITGAV,EGF,COL6A2,ITGA9,PDGFC,VEGFC,COL1A2,VEGFD,TNXB,PDGFD,LAMB2,THBS2,COL4A1,LAMA2,LAMB3
1	TRUE	0.000762	396	1124	62	0.055	0.157	GO:0006820	BP	anion transport	SLC7A2,ABCB4,ATP1A2,ANO2,ABCC9,CLCN4,CA12,SLC1A3,ATP8B1,NCOA1,ABCB1,FXYD3,DPYSL2,PLTP,CA2,SLC17A7,SLC1A1,APBA1,ABCC3,SLC6A12,SLC16A10,TMEM30A,CLIC5,PCYOX1,RGS2,SLC19A2,ABCD3,CRY2,ANO1,PPARG,SPX,ADAMTS8,CD36,AGT,SLCO2B1,THBS1,SLC38A4,TNFRSF11A,MPC2,OSR1,SLC22A3,PLIN2,NTRK2,GJA1,PLA2R1,SLC26A2,SLC34A2,STC1,CLIC6,CA3,ABCA1,AVPR1A,CA4,PTAFR,SLCO2A1,CA13,IRS2,PPARA,ENPP1,VAMP2,AQP1,HBB
1	TRUE	0.000791	144	1124	31	0.028	0.215	GO:0050920	BP	regulation of chemotaxis	FGF10,CXCL2,ANGPT2,PDGFB,RARRES2,CXCL12,CCL2,SMOC2,SEMA5A,THBS4,FGF1,PADI2,F3,KDR,PDGFRA,CCL21,THBS1,NTRK3,SLIT2,CXCL14,PLA2G7,VEGFC,IL6R,VEGFD,CXCL8,PDGFD,CCL19,NTF3,LPAR1,BMPR2,PLXNA4
1	TRUE	0.00082	89	1124	23	0.02	0.258	GO:0070252	BP	actin-mediated cell contraction	ATP1A2,KCNQ1,TNNT2,KCNJ8,KCNJ2,KCNA5,TPM1,CAMK2D,ANK2,GJA1,CACNA2D1,TTN,STC1,MYL3,PDPN,KCND3,KCNE3,SCN4B,TPM2,PLN,DMD,EMP2,GJA5
1	TRUE	0.000902	96	1124	24	0.021	0.25	GO:1905952	BP	regulation of lipid localization	ABCB4,TAC1,MSR1,PLTP,SPP1,CRY2,LRP1,PPARG,CD36,AGT,THBS1,ITGAV,EGF,FTO,TNFRSF11A,AGTR1,PLA2R1,ABCA1,C1QTNF1,LPL,PARK2,IRS2,PPARA,PLIN5
1	TRUE	0.000932	130	516	29	0.056	0.223	KEGG:04022	keg	cGMP-PKG signaling pathway	ATP1A2,ATP2B4,MRVI1,MYL9,RGS2,AKT3,KCNJ8,GNAI1,ATP1B2,ADCY4,EDNRB,FXYD2,PDE5A,AGTR1,ADRA2A,EDNRA,GUCY1A2,GNAQ,NPR2,INSR,PDE3A,SLC8A1,PRKG1,IRS2,PDE2A,KCNMB2,CNGA1,PLN,ADRA2B
1	TRUE	0.000988	304	1124	51	0.045	0.168	GO:0050673	BP	epithelial cell proliferation	IGF1,SNAI2,NGFR,FGF10,FAP,B4GALT1,PDGFB,WFDC1,CXCL12,CCL2,SEMA5A,SPARC,THBS4,FGF1,HYAL1,IGFBP5,AKT3,F3,NR4A3,NR4A1,KDR,DLL4,RGN,PPARG,SERPINF1,APLNR,EHF,GLUL,EDNRB,SULF1,THBS1,OSR1,AGTR1,SFRP2,IGFBP3,CDKN2B,VEGFC,GJA1,KIT,TGFA,BMPER,VEGFD,ATOH8,AR,LRG1,COL8A2,CYP7B1,PTPRM,CD34,ZFP36L1,BMPR2
1	TRUE	0.000999	279	1124	48	0.043	0.172	GO:0055074	BP	calcium ion homeostasis	TAC1,CX3CL1,ATP1A2,ATP2B4,ADCYAP1R1,JPH4,CXCL12,FAM20A,SELENOK,CASQ2,RAMP3,KCNA5,HRC,RGN,KL,APLNR,PDGFRA,CD36,AGT,EDNRB,CCL21,PLCE1,ITGAV,SYPL2,AGTR1,CAMK2D,ANK2,ADM,JPH2,EDNRA,GJA1,CACNA2D1,STC1,PTH1R,AVPR1A,P2RY1,CALB2,CCL19,C1QTNF1,TMEM64,CAPS2,SLC8A1,SMDT1,SLC24A3,RYR1,LPAR1,PLN,DMD
1	TRUE	0.00102	56	516	17	0.033	0.304	KEGG:04610	keg	Complement and coagulation cascades	C6,C7,F3,CLU,F13A1,MASP1,SERPING1,C1R,SERPINF2,FGA,FGB,C1QA,A2M,THBD,SERPINA5,SERPINA1,F5
1	TRUE	0.00103	296	1124	50	0.044	0.169	GO:0034765	BP	regulation of ion transmembrane transport	CX3CL1,ATP1A2,KCNQ1,ATP2B4,PTPN3,ABCB1,FXYD3,JPH4,KCNK6,PPARGC1A,CLIC5,RGS2,AKAP7,CASQ2,KCNJ8,RAMP3,KCNJ2,HSPA2,ATP1B2,KCNA5,HRC,RGN,APLNR,AGT,SCN7A,FXYD2,THBS1,OSR1,CAMK2D,ANK2,CRHBP,JPH2,ADRA2A,GJA1,CACNA2D1,KCNB1,PINK1,CLIC6,PTAFR,KCND3,KCNE3,SCN4B,SLC8A1,KCNIP4,IRS2,PLN,DMD,VAMP2,SHANK3,GJA5
1	TRUE	0.0011	176	1124	35	0.031	0.199	GO:0007204	BP	positive regulation of cytosolic calcium ion concentration	TAC1,CX3CL1,ATP1A2,ATP2B4,ADCYAP1R1,JPH4,CASQ2,RAMP3,HRC,APLNR,PDGFRA,CD36,AGT,EDNRB,CCL21,PLCE1,ITGAV,AGTR1,CAMK2D,ANK2,ADM,JPH2,EDNRA,GJA1,CACNA2D1,PTH1R,AVPR1A,P2RY1,CCL19,C1QTNF1,SLC8A1,RYR1,LPAR1,PLN,DMD
1	TRUE	0.00117	104	1124	25	0.022	0.24	GO:0050921	BP	positive regulation of chemotaxis	FGF10,CXCL2,PDGFB,RARRES2,CXCL12,SMOC2,SEMA5A,THBS4,F3,KDR,CCL21,THBS1,NTRK3,SLIT2,CXCL14,PLA2G7,VEGFC,IL6R,VEGFD,CXCL8,PDGFD,CCL19,NTF3,LPAR1,BMPR2
1	TRUE	0.00118	132	1124	29	0.026	0.22	GO:0006941	BP	striated muscle contraction	ATP1A2,MYOM2,KCNQ1,RGS2,TNNT2,CTGF,CASQ2,KCNJ8,KCNJ2,KCNA5,HRC,PDE5A,TPM1,CAMK2D,ANK2,GJA1,CACNA2D1,TTN,STC1,MYL3,KCND3,KCNE3,SCN4B,SLC8A1,MB,PLN,DMD,KLHL41,GJA5
1	TRUE	0.00133	57	516	17	0.033	0.298	KEGG:03320	keg	PPAR signaling pathway	SORBS1,PLTP,ACADL,PPARG,HMGCS2,CD36,CYP27A1,SCD5,PLIN2,AQP7,PLIN1,PLIN4,ANGPTL4,ACOX2,LPL,PPARA,PLIN5
1	TRUE	0.00134	60	1124	18	0.016	0.3	GO:0014910	BP	regulation of smooth muscle cell migration	IGF1,NOX4,PDGFB,PPARGC1A,IGFBP5,NR4A3,LRP1,POSTN,AGT,SEMA6D,TPM1,MYOCD,SLIT2,CAMK2D,IGFBP3,PDGFD,PRKG1,LPAR1
1	TRUE	0.00135	98	1124	24	0.021	0.245	GO:0010811	BP	positive regulation of cell-substrate adhesion	CX3CL1,AGR2,ECM2,SPOCK2,SMOC2,NID1,SDC4,KDR,CD36,CCL21,CYR61,VEGFC,CCL28,DMTN,FBLN2,EDIL3,EGFLAM,NPNT,FGA,FGB,NDNF,S100A10,DMD,EMP2
1	TRUE	0.00135	66	1124	19	0.017	0.288	GO:0060191	BP	regulation of lipase activity	ADCYAP1R1,PCSK5,RGS2,LRP1,PDGFRA,AGT,CYR61,AGTR1,NTRK2,EDNRA,PLA2R1,GNAQ,KIT,AVPR1A,ANGPTL4,PTAFR,LPL,LPAR1,PLIN5
1	TRUE	0.00135	93	516	23	0.045	0.247	KEGG:04080	keg	Neuroactive ligand-receptor interaction	PTGER3,ADCYAP1R1,GHR,PRLR,HRH2,VIPR1,LEPR,CNR1,PTGFR,APLNR,EDNRB,AGTR1,ADRA2A,THRB,EDNRA,PTH1R,NPY1R,AVPR1A,PTAFR,P2RY1,PTGER4,LPAR1,ADRA2B
1	TRUE	0.00154	49	1124	16	0.014	0.327	GO:1903524	BP	positive regulation of blood circulation	KCNQ1,PTGS2,SLC1A1,HRH2,RGS2,CTGF,HRC,HEY2,TPM1,ADM,GJA1,AVPR1A,PTAFR,FGA,FGB,GJA5
1	TRUE	0.00157	141	1124	30	0.027	0.213	GO:2000377	BP	regulation of reactive oxygen species metabolic process	ATP2B4,PTGS2,NOX4,PDGFB,PON3,CRYAB,FOXO3,CLU,PTGIS,RIPK3,RGN,CD36,AGT,THBS1,FBLN5,AGTR1,MMP3,FOXO1,DDAH1,MPV17L,PINK1,INSR,CD34,PARK2,TLR5,BCO2,MT-CO2,PLIN5,HBB,HP
1	TRUE	0.00164	24	1124	11	0.01	0.458	GO:0098801	BP	regulation of renal system process	TAC1,PDGFB,SPX,AGT,EDNRB,AGTR1,GJA1,STC1,AVPR1A,EMP2,GJA5
1	TRUE	0.00165	99	1124	24	0.021	0.242	GO:0001508	BP	action potential	TAC1,ATP1A2,KCNQ1,PTPN3,CNR1,AKAP7,KCNJ8,KCNJ2,KCNA5,SCN7A,SCARB2,CAMK2D,ANK2,GJA1,CACNA2D1,GNAQ,KCNB1,KCND3,KCNE3,SCN4B,SLC8A1,KCNMB2,DMD,GJA5
1	TRUE	0.00169	259	1124	45	0.04	0.174	GO:0045177	CC	apical part of cell	ABCB4,MGST1,ADGRF5,ITGA8,FAP,ATP8B1,ABCB1,NOX4,TF,EPB41L4B,JAG1,CA2,SLC1A1,MPDZ,TMEM30A,AKAP7,ATP1B2,KCNA5,ANO1,KL,CHL1,CD36,MYO7A,SLCO2B1,ENPEP,ANK2,GJA1,CNKSR3,SLC26A2,SLC34A2,SHROOM4,STC1,IL6R,PTH1R,CD300LG,PDPN,VCAM1,CA4,P2RY1,CD34,FAT4,BMPR2,EMP2,C1QTNF5,AQP1
1	TRUE	0.00176	61	1124	18	0.016	0.295	GO:0042562	MF	hormone binding	ATP1A2,GHR,NPR3,PRLR,VIPR1,INHBA,RAMP2,RAMP1,EDNRB,SLC40A1,CRHBP,THRB,NPR2,PTH1R,ALDH1A1,AVPR1A,AR,INSR
1	TRUE	0.00202	29	1124	12	0.011	0.414	GO:0055078	BP	sodium ion homeostasis	TAC1,ATP1A2,C7,ATP1B2,SPX,AGT,EDNRB,SCN7A,AGTR1,TMPRSS3,AVPR1A,SLC8A1
1	TRUE	0.00264	214	1124	39	0.035	0.182	GO:0070371	BP	ERK1 and ERK2 cascade	CX3CL1,IGF1,LMO3,FGF10,NOX4,TF,TIMP3,PDGFB,CCL2,DUSP3,CTGF,RAMP3,KDR,PDGFRA,CD36,AGT,CCL21,ITGAV,EGF,TNFRSF11A,CYR61,ACKR3,CAMK2D,PDGFC,ZFP36L2,CNKSR3,BMPER,NDRG2,SERPINF2,NPNT,P2RY1,PDGFD,PTGER4,FGA,FGB,CCL19,ZFP36L1,STYX,DMD
1	TRUE	0.00294	102	1124	24	0.021	0.235	GO:0001936	BP	regulation of endothelial cell proliferation	NGFR,PDGFB,CXCL12,CCL2,SEMA5A,SPARC,THBS4,AKT3,F3,NR4A1,KDR,DLL4,PPARG,APLNR,SULF1,THBS1,AGTR1,VEGFC,GJA1,VEGFD,ATOH8,LRG1,PTPRM,BMPR2
1	TRUE	0.00294	102	1124	24	0.021	0.235	GO:0061041	BP	regulation of wound healing	ENPP4,FAP,PDGFB,WFDC1,KANK1,SMOC2,F3,PDGFRA,CD36,THBS1,PHLDB2,SERPING1,ADRA2A,GJA1,DMTN,PLPP3,PDPN,SERPINF2,FGA,FGB,C1QTNF1,CD34,THBD,PRKG1
1	TRUE	0.00295	116	1124	26	0.023	0.224	GO:0001935	BP	endothelial cell proliferation	NGFR,PDGFB,CXCL12,CCL2,SEMA5A,SPARC,THBS4,AKT3,F3,NR4A1,KDR,DLL4,PPARG,APLNR,SULF1,THBS1,AGTR1,VEGFC,GJA1,BMPER,VEGFD,ATOH8,LRG1,PTPRM,CD34,BMPR2
1	TRUE	0.00318	176	1124	34	0.03	0.193	GO:0043542	BP	endothelial cell migration	DCN,PTGS2,FAP,ANGPT2,PDGFB,MEOX2,SMOC2,SEMA5A,SPARC,FGF1,AKT3,NR4A1,RHOJ,KDR,DLL4,PPARG,SERPINF1,AGT,THBS1,ANXA3,RAB13,SLIT2,VEGFC,STC1,PLPP3,ADAMTS9,BMPER,ATOH8,EFNA1,PTPRM,CLEC14A,CCBE1,BMPR2,EMP2
1	TRUE	0.00345	46	1124	15	0.013	0.326	GO:0051952	BP	regulation of amine transport	ATP1A2,DPYSL2,CXCL12,RGS2,CNR1,AGT,OSR1,ADRA2A,KCNB1,PINK1,AVPR1A,P2RY1,SNCG,PARK2,ADRA2B
1	TRUE	0.00351	117	1124	26	0.023	0.222	GO:0035637	BP	multicellular organismal signaling	ATP1A2,KCNQ1,ATP2B4,KCNK6,CASQ2,KCNJ2,ATP1B2,KCNA5,HRC,AGT,SCN7A,CAMK2D,ANK2,GJA1,CACNA2D1,NPR2,TMEM65,AVPR1A,KCND3,KCNE3,SCN4B,SLC8A1,RYR1,KCNMB2,PLN,GJA5
1	TRUE	0.00351	387	1124	59	0.052	0.152	GO:0001501	BP	skeletal system development	LTF,IGF1,SNAI2,CHRDL2,RARB,WNT11,MMP2,CHRD,PCSK5,COMP,AEBP1,PLEKHA1,FBXW4,ZBTB16,GHR,SPARC,NPR3,HYAL1,PRRX1,CTGF,TGFB3,KIAA1217,LRRC17,RGN,POSTN,PDGFRA,SULF1,RBP4,LUM,CDH11,CYR61,WNT9A,OSR1,SFRP2,PDGFC,GNAQ,KIT,STC1,NPR2,PTH1R,DHRS3,COL1A2,TNFRSF11B,COL3A1,SIX2,CYTL1,PTGER4,RAB33B,MAF,SPNS2,PRELP,FAT4,RYR1,PAPSS2,BMPR2,COL5A2,TMEM110-MUSTN1,GJA5,MUSTN1
1	TRUE	0.00354	396	1124	60	0.053	0.152	GO:0009617	BP	response to bacterium	TAC1,CX3CL1,MGST1,DCN,LTF,NGFR,BCL3,MAOB,FGF10,PTGS2,CXCL2,GSDMD,WASL,RARRES2,CCL2,FAM20A,PPARGC1A,SPARC,PLSCR4,CNR1,KCNJ8,PTGFR,TMEM255A,SYT11,CD36,EDNRB,TLR2,RAB1A,SCARB2,ANXA3,TNFRSF11A,HMCN1,ADM,GJA1,BANK1,ADAMTS5,TIMP4,SPON2,IL6R,VCAM1,ADAMTS9,HPGD,TNFRSF11B,DEFB1,CA3,ABCA1,VEGFD,PTAFR,CXCL8,LRG1,PTGER4,FGA,FGB,THBD,HIST2H2BE,TLR5,LITAF,TNFRSF6B,HP,MRC1
1	TRUE	0.00393	147	1124	30	0.027	0.204	GO:0030017	CC	sarcomere	MYOM2,ATP2B4,ABCC9,PPP1R12B,MMP2,CRYAB,TNNT2,CASQ2,LRRC39,KCNA5,HRC,TPM1,ANK2,JPH2,DST,PGM5,PDLIM3,TTN,TIMP4,MYL3,LMOD1,CMYA5,SYNPO,MYOZ1,SLC8A1,RYR1,TPM2,DMD,KLHL41,MYZAP
1	TRUE	0.00401	125	1124	27	0.024	0.216	GO:0006109	BP	regulation of carbohydrate metabolic process	PDK4,IGF1,ADCYAP1R1,SORBS1,PDGFB,PPARGC1A,IGFBP5,LEPR,RGN,PPP1R3D,EGF,IGFBP3,FOXO1,TFF3,PTH1R,PRKAA2,FBP1,GPD1,PTAFR,P2RY1,INSR,PPP1R3B,C1QTNF1,PARK2,IRS2,PPARA,ENPP1
1	TRUE	0.00423	186	1124	35	0.031	0.188	GO:0010632	BP	regulation of epithelial cell migration	TAC1,DCN,FGF10,PTGS2,ANGPT2,EPB41L4B,PDGFB,MEOX2,SMOC2,SEMA5A,SPARC,FGF1,HYAL1,AKT3,RHOJ,KDR,DLL4,PPARG,SERPINF1,AGT,THBS1,ANXA3,PTPRG,SLIT2,VEGFC,STC1,PLPP3,ADAMTS9,BMPER,ATOH8,EFNA1,PTPRM,CCBE1,BMPR2,EMP2
1	TRUE	0.00425	104	1124	24	0.021	0.231	GO:0051384	BP	response to glucocorticoid	MAOB,PTGS2,GHR,SPARC,FOXO3,CDO1,SERPINF1,ANXA3,NTRK3,SLIT2,PAM,ADM,FOXO1,ZFP36L2,STC1,S100B,AGL,IGFBP7,AVPR1A,PTAFR,FIBIN,SLIT3,ZFP36L1,AQP1
1	TRUE	0.00442	268	1124	45	0.04	0.168	GO:0006874	BP	cellular calcium ion homeostasis	TAC1,CX3CL1,ATP1A2,ATP2B4,ADCYAP1R1,JPH4,CXCL12,SELENOK,CASQ2,RAMP3,KCNA5,HRC,RGN,APLNR,PDGFRA,CD36,AGT,EDNRB,CCL21,PLCE1,ITGAV,SYPL2,AGTR1,CAMK2D,ANK2,ADM,JPH2,EDNRA,GJA1,CACNA2D1,STC1,PTH1R,AVPR1A,P2RY1,CALB2,CCL19,C1QTNF1,TMEM64,SLC8A1,SMDT1,SLC24A3,RYR1,LPAR1,PLN,DMD
1	TRUE	0.00442	163	1124	32	0.028	0.196	GO:0071229	BP	cellular response to acid chemical	PDK4,ABCB4,TNC,EPHA3,WNT11,MMP2,PDGFB,PPARGC1A,PTGFR,FFAR2,KDR,PPARG,SERPINF1,NTRK3,WNT9A,OSR1,PDGFC,NTRK2,RRAGA,PINK1,PRKAA2,COL1A2,ABCA1,AVPR1A,COL3A1,PTAFR,PDGFD,PTGER4,FZD4,COL4A1,COL5A2,AQP1
1	TRUE	0.00469	47	1124	15	0.013	0.319	GO:0015837	BP	amine transport	ATP1A2,DPYSL2,CXCL12,RGS2,CNR1,AGT,OSR1,ADRA2A,KCNB1,PINK1,AVPR1A,P2RY1,SNCG,PARK2,ADRA2B
[truncated: 1,136 more rows]
