# Supplementary material for: A human ESC-based screen identifies a role for the translated lncRNA LINC00261 in pancreatic endocrine differentiation
Source: eLife. 2020 Aug 3;9:e58659. doi: 10.7554/eLife.58659 (PMC7423336; doi:10.7554/eLife.58659)
Supplement: Figure 3—source data 1. — (A) Coordinates of CRISPR deletions. (B) Differentially expressed genes in RP11-445F12.1 knockout at definitive endoderm stage. (C) Differentially expressed genes in GATA6-AS1 knockout at definitive endoderm stage. (D) Differentially expressed genes in LINC00261 knockout at definitive endoderm stage. (E) Differentially expressed genes in LINC00617 knockout at PP2 stage. (F) Differentially expressed genes in GATA6-AS1 knockout at PP2 stage. (G) Differentially expressed genes in LINC00479 knockout at PP2 stage. (H) Differentially expressed genes in RP11-834C11.4 knockout at PP2 stage. (I) Differentially expressed genes in SOX9-AS1 knockout at PP2 stage. (J) Differentially expressed genes in MIR7-3HG knockout at PP2 stage. (K) Differentially expressed genes in LHFPL3-AS2 knockout at PP2 stage. [file elife-58659-fig3-data1.xlsx]

## Sheet: Table info
Figure 3–Source data 1	Differentially expressed genes after lncRNA deletion
S3A	Coordinates of CRISPR deletions
S3B	Differentially expressed genes in RP11-445F12.1 knockout at definitive endoderm stage
S3C	Differentially expressed genes in GATA6-AS1 knockout at definitive endoderm stage
S3D	Differentially expressed genes in LINC00261 knockout at definitive endoderm stage
S3E	Differentially expressed genes in LINC00617 knockout at PP2 stage
S3F	Differentially expressed genes in GATA6-AS1 knockout at PP2 stage
S3G	Differentially expressed genes in LINC00479 knockout at PP2 stage
S3H	Differentially expressed genes in RP11-834C11.4 knockout at PP2 stage
S3I	Differentially expressed genes in SOX9-AS1 knockout at PP2 stage
S3J	Differentially expressed genes in MIR7-3HG knockout at PP2 stage
S3K	Differentially expressed genes in LHFPL3-AS2 knockout at PP2 stage

## Sheet: S3A
Locus	Clone	sgRNAs #	Size of genomic deletion	Genomic coordinates of deletion (hg38)
LINC00617	1	1, 2	9,728 bp	chr14:95,871,308-95,881,035
	2	1, 2	9,728 bp	chr14:95,871,308-95,881,035
RP11-445F12.1	1	1, 2	554 bp	chr17:36,936,094-36,936,647
	2	1, 2	554 bp	chr17:36,936,094-36,936,647
DIGIT	1	1, 2	1,330 bp	chr14:94,772,300-94,773,629
	2	1, 2	1,330 bp	chr14:94,772,300-94,773,629
GATA6-AS1	1	1, 2	2,091 bp	chr18:22,166,832-22,168,922
	2	1, 2	2,091 bp	chr18:22,166,832-22,168,922
LINC00479	1	1, 2	4,614 bp	chr21:41,711,911-41,716,524
	2	1, 2	4,614 bp	chr21:41,711,911-41,716,524
LINC00261	1	1, 3	2,319 bp	chr20:22,577,500-22,579,818
	2	1, 4	2,283 bp	chr20:22,577,536-22,579,818
	3	2, 3	2,042 bp	chr20:22,577,500-22,579,541
	4	2, 4	2,006 bp	chr20:22,577,536-22,579,541
RP11-834C11.4	1	1, 2	3,948 bp	chr12:54,126,161-54,130,108
	2	2, 3	3,562 bp	chr12:54,126,547-54,130,108
SOX9-AS1	1	1, 2, 3, 4	22,830 bp (1,2)	chr17:72,093,724-72,116,553
			4,613 bp (3,4)	chr17:72,079,381-72,083,993
MIR7-3HG	1	1, 2	485 bp	chr19:4,769,043-4,769,527
	2	2, 3	2,159 bp	chr19:4,767,369-4,769,527
LHFPL3-AS2	1	1, 3	4,283 bp	chr7:104,923,028-104,927,310
	2	2, 3	9,619 bp	chr7:104,917,692-104,927,310
PDX1	1	1, 2	5,162 bp	chr13:27,920,070-27,925,231

## Sheet: S3B
gene_short_name	baseMean	log2FoldChange	lfcSE	stat	pvalue	padj	differentially_expressed
RP11-445F12.1	1065.63	2.19716	0.264869	8.29526	1.08347e-16	3.23807e-12	TRUE
FOXI2	150.252	1.40216	0.293027	4.78509	1.70912e-06	0.0255394	FALSE
SEZ6L	1371.95	-1.08835	0.252692	-4.30704	1.65456e-05	0.164828	FALSE
NMU	1473.68	1.22797	0.307491	3.99351	6.51033e-05	0.486419	FALSE
AGPAT4-IT1	107.936	1.16022	0.30484	3.80601	0.000141227	0.761145	FALSE
CLDN3	288.334	1.12927	0.306497	3.68443	0.000229214	0.761145	FALSE
MALAT1	9950.2	1.15823	0.307258	3.76955	0.000163542	0.761145	FALSE
RPL39L	288.788	1.07803	0.288625	3.73506	0.000187668	0.761145	FALSE
TPGS1	151.517	1.10466	0.299475	3.68865	0.000225449	0.761145	FALSE
NDUFS7	960.849	1.05225	0.291914	3.60465	0.000312573	0.877433	FALSE
TNNC1	627.953	1.09284	0.303891	3.59616	0.000322953	0.877433	FALSE
5S_rRNA	0.805266	0.0845503	0.109784	0.770153	0.441209	1	FALSE
A1BG	4.54505	0.219423	0.206083	1.06473	0.286997	1	FALSE
A1BG-AS1	201.788	0.305863	0.270298	1.13158	0.257812	1	FALSE
A1CF	2.1051	-0.111827	0.164169	-0.68117	0.495764	1	FALSE
A2M	0.618131	0.000758953	0.0894896	0.00848091	0.993233	1	FALSE
A2M-AS1	21.0232	0.00812033	0.305352	0.0265933	0.978784	1	FALSE
A2ML1	472.429	-0.191505	0.27538	-0.695421	0.486792	1	FALSE
A2MP1	0.778493	0.00146498	0.0968035	0.0151336	0.987926	1	FALSE
A3GALT2	0.506141	-0.00385909	0.0844222	-0.0457118	0.96354	1	FALSE
A4GALT	109.558	0.274324	0.307761	0.891354	0.37274	1	FALSE
AAAS	1744.15	0.148349	0.247605	0.599134	0.549083	1	FALSE
AACS	2073.07	-0.105889	0.228626	-0.463154	0.643254	1	FALSE
AACSP1	0.642482	-0.00612283	0.0912737	-0.0670821	0.946516	1	FALSE
AADACL3	1.88041	0.0238859	0.154008	0.155095	0.876746	1	FALSE
AADACL4	0.784127	0.0782369	0.0794066	0.985269	0.324492	1	FALSE
AADAT	1697.35	0.206309	0.252091	0.81839	0.413134	1	FALSE
AAED1	120.086	0.0848959	0.286494	0.296327	0.76698	1	FALSE
AAGAB	3396.11	-0.124182	0.273639	-0.453815	0.649962	1	FALSE
AAK1	519.28	0.0429113	0.255997	0.167625	0.866879	1	FALSE
AAMDC	408.33	0.35338	0.273928	1.29005	0.197035	1	FALSE
AAMP	3313.77	-0.179434	0.250957	-0.714997	0.474611	1	FALSE
AANAT	11.8584	-0.0806838	0.271458	-0.297224	0.766296	1	FALSE
AAR2	1085.37	-0.0676649	0.249297	-0.271423	0.786066	1	FALSE
AARD	6.49112	0.0575153	0.246286	0.23353	0.81535	1	FALSE
AARS	7563.2	0.0103143	0.273856	0.0376632	0.969956	1	FALSE
AARS2	844.993	0.0216926	0.243504	0.0890852	0.929014	1	FALSE
AARSD1	40.8802	0.211557	0.306651	0.689895	0.49026	1	FALSE
AASDH	480.106	-0.127098	0.298433	-0.425886	0.670191	1	FALSE
AASDHPPT	1558.23	-0.23676	0.25228	-0.93848	0.347998	1	FALSE
AASS	973.479	-0.0762269	0.2983	-0.255537	0.798308	1	FALSE
AATBC	0.96503	-0.0676098	0.105939	-0.638197	0.523346	1	FALSE
AATF	2983.42	-0.0421232	0.223715	-0.18829	0.850649	1	FALSE
AATK	31.6822	0.0173792	0.307595	0.0565003	0.954943	1	FALSE
AB015752.3	0.703093	-0.0406436	0.111872	-0.363305	0.716377	1	FALSE
AB019441.29	11.8172	0.167246	0.284917	0.586999	0.557204	1	FALSE
ABALON	1.40566	-0.0627228	0.138526	-0.452787	0.650702	1	FALSE
ABAT	179.904	0.347809	0.266761	1.30382	0.192295	1	FALSE
ABC11-4932300O16.1	0.311882	0.0430497	0.0747468	0.575941	0.564655	1	FALSE
ABC12-49244600F4.4	11.5515	-0.04372	0.274604	-0.159211	0.873503	1	FALSE
ABC13-47488600E17.1	1.9462	0.03529	0.169678	0.207982	0.835243	1	FALSE
ABC13-47656900H15.1	1.39392	-0.0562131	0.137742	-0.408106	0.683196	1	FALSE
ABCA1	2260.19	-0.162723	0.298571	-0.545007	0.585749	1	FALSE
ABCA10	7.95328	-0.274035	0.267387	-1.02486	0.305428	1	FALSE
ABCA11P	25.0905	0.260165	0.307804	0.845231	0.397982	1	FALSE
ABCA12	1.51558	-0.0578992	0.12649	-0.457738	0.647141	1	FALSE
ABCA13	0.924091	0.0274797	0.122993	0.223424	0.823206	1	FALSE
ABCA17P	0.260469	0	0.0747468	0	1	1	FALSE
ABCA2	702.526	0.0804764	0.260578	0.308838	0.757445	1	FALSE
ABCA3	336.907	-0.626615	0.256198	-2.44582	0.0144522	1	FALSE
ABCA4	16.4725	-0.125168	0.295394	-0.423732	0.671761	1	FALSE
ABCA5	175.54	-0.368647	0.293571	-1.25574	0.209212	1	FALSE
ABCA6	1.58817	-0.101084	0.135532	-0.745832	0.455769	1	FALSE
ABCA7	2236.68	0.191365	0.267028	0.716645	0.473593	1	FALSE
ABCA8	1.64646	0.0861913	0.153014	0.563291	0.573237	1	FALSE
ABCA9	1.45199	-0.121057	0.121707	-0.994657	0.319903	1	FALSE
ABCA9-AS1	1.85774	0.0924901	0.152044	0.608311	0.542981	1	FALSE
ABCB1	2.65434	0.103598	0.15554	0.666052	0.505378	1	FALSE
ABCB10	617.936	-0.262388	0.261448	-1.00359	0.315575	1	FALSE
ABCB10P1	2.71359	0.0494929	0.18846	0.262617	0.792846	1	FALSE
ABCB10P4	0.214163	-0.0432605	0.0747468	-0.57876	0.562751	1	FALSE
ABCB11	0.766569	-0.0513507	0.107668	-0.476935	0.633408	1	FALSE
ABCB4	6.76065	-0.072162	0.252065	-0.286283	0.774661	1	FALSE
ABCB5	0.214163	-0.0432605	0.0747468	-0.57876	0.562751	1	FALSE
ABCB6	89.3591	0.307432	0.300001	1.02477	0.305471	1	FALSE
ABCB7	1005.85	-0.0192337	0.248471	-0.0774081	0.938299	1	FALSE
ABCB8	847.441	0.22524	0.250326	0.899787	0.368234	1	FALSE
ABCB9	75.2977	0.338666	0.300802	1.12588	0.260217	1	FALSE
ABCC1	2321.91	-0.36991	0.251106	-1.47312	0.140719	1	FALSE
ABCC10	1026.32	0.176845	0.262142	0.674618	0.499918	1	FALSE
ABCC11	7.53287	-0.0352086	0.254085	-0.13857	0.88979	1	FALSE
ABCC12	10.428	0.0154211	0.265224	0.0581438	0.953634	1	FALSE
ABCC2	22.8378	-0.151526	0.305466	-0.49605	0.619859	1	FALSE
ABCC3	0.950507	0.112104	0.109692	1.02199	0.306787	1	FALSE
ABCC4	3680.36	-0.107036	0.296777	-0.360661	0.718353	1	FALSE
ABCC5	1287.08	0.0143534	0.274971	0.0521996	0.95837	1	FALSE
ABCC6	13.5977	-0.289537	0.29475	-0.982314	0.325945	1	FALSE
ABCC6P1	12.0784	-0.289562	0.289326	-1.00082	0.316916	1	FALSE
ABCC6P2	1.724	-0.0416669	0.15117	-0.27563	0.782832	1	FALSE
ABCC8	6.61582	-0.0518676	0.247091	-0.209913	0.833736	1	FALSE
ABCC9	3.41027	-0.0770509	0.19973	-0.385775	0.699664	1	FALSE
ABCD1	1419.65	0.47905	0.302849	1.58181	0.113692	1	FALSE
ABCD1P4	0.194744	0	0.0747468	0	1	1	FALSE
ABCD2	0.189273	0	0.0747468	0	1	1	FALSE
ABCD3	751.754	-0.107742	0.240697	-0.447626	0.654423	1	FALSE
ABCD4	3240.22	0.115696	0.258206	0.448076	0.654098	1	FALSE
ABCE1	1759.08	-0.316208	0.256573	-1.23243	0.217789	1	FALSE
ABCF1	4547.92	-0.0904753	0.245338	-0.368778	0.712293	1	FALSE
ABCF2	1975.99	-0.0582311	0.24739	-0.235381	0.813913	1	FALSE
ABCF2P1	0.807761	-0.0231667	0.10174	-0.227704	0.819876	1	FALSE
ABCF3	1165.98	-0.0696535	0.2385	-0.292048	0.77025	1	FALSE
ABCG1	176.983	0.116589	0.275183	0.423679	0.6718	1	FALSE
ABCG2	8.47621	0.232938	0.243391	0.95705	0.338542	1	FALSE
ABCG4	218.358	0.335063	0.296643	1.12952	0.258681	1	FALSE
ABCG8	0.292465	-0.0432605	0.0747468	-0.57876	0.562751	1	FALSE
ABHD1	1.91077	-0.198997	0.163646	-1.21602	0.223976	1	FALSE
ABHD10	610.182	0.122788	0.237203	0.517648	0.604704	1	FALSE
ABHD11	826.944	0.152521	0.269132	0.566716	0.570907	1	FALSE
ABHD11-AS1	5.20195	0.169372	0.237399	0.71345	0.475568	1	FALSE
ABHD12	1898.66	0.152278	0.282948	0.538183	0.590451	1	FALSE
ABHD12B	31.2626	0.491932	0.30707	1.60202	0.109152	1	FALSE
ABHD13	522.082	-0.283422	0.256368	-1.10552	0.268932	1	FALSE
ABHD14A	132.079	0.223053	0.307834	0.724586	0.468706	1	FALSE
ABHD14A-ACY1	0.454581	0.0372762	0.0751709	0.495886	0.619975	1	FALSE
ABHD14B	256.674	0.301653	0.265585	1.1358	0.256039	1	FALSE
ABHD15	56.3534	-0.139365	0.303168	-0.459696	0.645735	1	FALSE
ABHD16A	67.6934	0.0330095	0.300937	0.109689	0.912656	1	FALSE
ABHD16B	0.600644	0	0.075723	0	1	1	FALSE
ABHD17A	473.132	0.222652	0.267146	0.833445	0.404594	1	FALSE
ABHD17AP1	2.12048	0.272902	0.175178	1.55786	0.119266	1	FALSE
ABHD17AP3	0.89963	0.0258635	0.0847121	0.305311	0.76013	1	FALSE
ABHD17AP5	0.294183	0.0214722	0.0747468	0.287265	0.773909	1	FALSE
ABHD17AP6	0.311882	0.0430497	0.0747468	0.575941	0.564655	1	FALSE
ABHD17B	961.79	-0.317305	0.243355	-1.30388	0.192276	1	FALSE
ABHD17C	552.113	-0.0527528	0.256684	-0.205516	0.837169	1	FALSE
ABHD18	553.2	-0.173872	0.270473	-0.642843	0.520326	1	FALSE
ABHD2	731.294	-0.1887	0.270224	-0.698308	0.484985	1	FALSE
ABHD3	593.969	0.11835	0.276832	0.427516	0.669003	1	FALSE
ABHD4	2156.76	0.255199	0.263305	0.969213	0.332439	1	FALSE
ABHD5	450.709	-0.0540313	0.257109	-0.21015	0.833551	1	FALSE
ABHD6	359.274	-0.111167	0.283539	-0.392071	0.695006	1	FALSE
ABHD8	333.267	0.534104	0.30728	1.73817	0.0821812	1	FALSE
ABI1	1179.63	-0.0644814	0.238027	-0.2709	0.786468	1	FALSE
ABI2	3077.65	-0.200043	0.2277	-0.878538	0.379652	1	FALSE
ABI3	30.3084	0.253073	0.28865	0.876748	0.380624	1	FALSE
ABI3BP	4.49046	0.068205	0.230148	0.296353	0.766961	1	FALSE
ABL1	3901.03	-0.138392	0.240484	-0.575471	0.564972	1	FALSE
ABL2	952.91	-0.210756	0.251156	-0.839144	0.401389	1	FALSE
ABLIM1	1470.7	-0.347311	0.283501	-1.22508	0.220544	1	FALSE
ABLIM2	24.6538	-0.134428	0.305163	-0.440513	0.659566	1	FALSE
ABLIM3	2.38359	0.0209235	0.1864	0.11225	0.910625	1	FALSE
ABO	4.78664	0.200544	0.229568	0.873568	0.382354	1	FALSE
ABR	2053.29	-0.0497487	0.246272	-0.202007	0.839911	1	FALSE
ABRACL	528.285	0.165536	0.267648	0.618485	0.536256	1	FALSE
ABT1	1382.8	0.0481945	0.263074	0.183198	0.854643	1	FALSE
ABTB1	168.76	0.0187182	0.278189	0.0672858	0.946354	1	FALSE
ABTB2	397.782	-0.142502	0.244515	-0.582794	0.560032	1	FALSE
AC000032.2	0.499869	0.0174406	0.0754458	0.231167	0.817185	1	FALSE
AC000035.3	0.200215	0	0.0747468	0	1	1	FALSE
AC000068.10	3.84575	-0.0982227	0.200252	-0.490495	0.623784	1	FALSE
AC000068.5	60.1961	-0.441895	0.296231	-1.49172	0.135772	1	FALSE
AC000068.9	5.3875	-0.0622171	0.241394	-0.257741	0.796607	1	FALSE
AC000089.3	6.16158	-0.173224	0.248443	-0.697239	0.485653	1	FALSE
AC000095.12	1.29829	0.119479	0.130786	0.913545	0.360956	1	FALSE
AC000095.9	0.259801	0.0214722	0.0747468	0.287265	0.773909	1	FALSE
AC000120.7	2.06765	0.0486608	0.146142	0.33297	0.739157	1	FALSE
AC000123.2	17.9468	0.0510965	0.294472	0.173519	0.862244	1	FALSE
AC000123.3	3.04455	-0.0445978	0.201201	-0.221658	0.82458	1	FALSE
AC000403.4	0.571822	-0.0299078	0.0790251	-0.37846	0.705089	1	FALSE
AC001226.7	1.47053	0.0747303	0.15147	0.493367	0.621753	1	FALSE
AC002044.4	4.91804	0.274902	0.196899	1.39615	0.162668	1	FALSE
AC002056.3	2.78815	0.0822114	0.187809	0.437739	0.661575	1	FALSE
AC002059.10	1.02315	-0.00277492	0.118174	-0.0234817	0.981266	1	FALSE
AC002064.7	0.194744	0	0.0747468	0	1	1	FALSE
AC002066.1	0.253314	-0.0432605	0.0747468	-0.57876	0.562751	1	FALSE
AC002069.5	0.608802	1.37937e-05	0.0987977	0.000139615	0.999889	1	FALSE
AC002075.3	0.194076	0.0214722	0.0747468	0.287265	0.773909	1	FALSE
AC002075.4	5.29203	-0.062509	0.234549	-0.266507	0.789849	1	FALSE
AC002076.10	0.462892	-0.018954	0.0751925	-0.252073	0.800985	1	FALSE
AC002115.5	0.795557	0.0155545	0.108114	0.143872	0.885602	1	FALSE
AC002116.7	4.52647	0.1305	0.229872	0.567708	0.570233	1	FALSE
AC002117.1	1.92245	0.0981292	0.165257	0.593798	0.552648	1	FALSE
AC002310.10	0.240869	-0.0216829	0.0747468	-0.290085	0.771751	1	FALSE
AC002310.12	53.6717	-0.037841	0.307651	-0.123	0.902107	1	FALSE
AC002310.14	2.67038	-0.0198689	0.188188	-0.10558	0.915916	1	FALSE
AC002310.7	1.28403	0.080993	0.1385	0.584787	0.558691	1	FALSE
AC002331.1	0.457421	-0.0226947	0.0817417	-0.277639	0.78129	1	FALSE
AC002398.11	0.501375	-0.00388356	0.0838918	-0.0462925	0.963077	1	FALSE
AC002398.12	0.198878	0.0430497	0.0747468	0.575941	0.564655	1	FALSE
AC002454.1	20.4477	0.407814	0.301193	1.354	0.175737	1	FALSE
AC002456.2	0.649002	0.0946931	0.0934342	1.01347	0.310834	1	FALSE
AC002463.3	0.255703	0	0.0747468	0	1	1	FALSE
AC002467.7	29.0061	-0.238453	0.307405	-0.775695	0.437929	1	FALSE
AC002480.2	51.9929	0.139487	0.307872	0.453069	0.650499	1	FALSE
AC002480.3	3.48054	-0.00400444	0.201778	-0.0198458	0.984166	1	FALSE
AC002480.5	125.831	0.102846	0.277723	0.370318	0.711145	1	FALSE
AC002486.3	0.603331	-7.48454e-05	0.098488	-0.000759944	0.999394	1	FALSE
AC002511.2	0.454258	0.0768198	0.0751621	1.02205	0.306755	1	FALSE
AC002519.6	0.451951	-0.0193206	0.0751329	-0.257153	0.797061	1	FALSE
AC002519.8	1.61321	0.0393006	0.144484	0.272007	0.785617	1	FALSE
AC002550.5	1.31604	0.0694389	0.122975	0.564658	0.572306	1	FALSE
AC002550.6	5.36386	-0.134073	0.244999	-0.547241	0.584214	1	FALSE
AC002551.1	0.199546	0.0214722	0.0747468	0.287265	0.773909	1	FALSE
AC003002.6	1.16016	-0.02988	0.140172	-0.213166	0.831198	1	FALSE
AC003003.5	28.8933	0.209914	0.304572	0.689212	0.49069	1	FALSE
AC003005.2	1.39999	-0.0526527	0.128631	-0.409331	0.682297	1	FALSE
AC003009.1	2.83978	-0.165914	0.182121	-0.91101	0.36229	1	FALSE
AC003075.4	0.656934	-0.0358614	0.10076	-0.35591	0.721908	1	FALSE
AC003080.4	0.626153	0.0131066	0.081338	0.161137	0.871985	1	FALSE
AC003104.1	2.83683	0.201471	0.175567	1.14754	0.251158	1	FALSE
AC003664.1	1.79129	-0.017821	0.145052	-0.122859	0.902219	1	FALSE
AC003682.16	1.17215	0.0985786	0.142703	0.690798	0.489692	1	FALSE
AC003973.3	0.448061	-0.0432605	0.0747468	-0.57876	0.562751	1	FALSE
AC003986.7	0.316303	0.0214722	0.0747468	0.287265	0.773909	1	FALSE
AC004019.10	3.54992	0.175094	0.19698	0.888892	0.374061	1	FALSE
AC004019.13	1.92617	0.050485	0.174842	0.288747	0.772775	1	FALSE
AC004051.2	0.194744	0	0.0747468	0	1	1	FALSE
AC004057.1	0.240869	-0.0216829	0.0747468	-0.290085	0.771751	1	FALSE
AC004067.5	0.352753	-0.0216829	0.0747468	-0.290085	0.771751	1	FALSE
AC004069.2	2.27279	-0.0673734	0.171431	-0.393007	0.694315	1	FALSE
AC004076.5	28.2782	0.0453039	0.296421	0.152837	0.878527	1	FALSE
AC004076.7	0.255035	0.0214722	0.0747468	0.287265	0.773909	1	FALSE
AC004076.9	0.207189	-0.0216829	0.0747468	-0.290085	0.771751	1	FALSE
AC004156.3	6.25936	-0.112879	0.233719	-0.482969	0.629118	1	FALSE
AC004160.4	23.1046	-0.321562	0.307185	-1.0468	0.295192	1	FALSE
AC004221.2	7.15933	-0.0309076	0.261861	-0.118031	0.906043	1	FALSE
AC004231.2	0.346447	-0.0216829	0.0747468	-0.290085	0.771751	1	FALSE
AC004381.6	98.5276	-0.00923989	0.294891	-0.0313333	0.975004	1	FALSE
AC004383.3	0.904106	-0.0575972	0.113701	-0.506567	0.612458	1	FALSE
AC004386.4	6.69208	-0.0333484	0.254416	-0.131079	0.895713	1	FALSE
AC004448.5	276.826	0.281841	0.306229	0.920361	0.357384	1	FALSE
AC004449.6	0.420163	0.0214722	0.0747468	0.287265	0.773909	1	FALSE
AC004453.8	37.9974	0.0409107	0.307875	0.132881	0.894287	1	FALSE
AC004471.10	0.360577	0	0.0747468	0	1	1	FALSE
AC004471.9	1.06402	-0.00719682	0.127454	-0.0564662	0.95497	1	FALSE
AC004485.3	0.392573	-0.0432605	0.0747468	-0.57876	0.562751	1	FALSE
AC004490.1	1.10282	-0.037414	0.131441	-0.284645	0.775916	1	FALSE
AC004538.3	120.937	-0.203952	0.293584	-0.694698	0.487245	1	FALSE
AC004540.5	4.83487	-0.0528849	0.233425	-0.226561	0.820765	1	FALSE
AC004543.2	3.04231	-0.00835897	0.177103	-0.0471985	0.962355	1	FALSE
AC004549.6	1.07282	0.0680478	0.120491	0.564754	0.572241	1	FALSE
AC004556.1	2.09656	-0.0254337	0.170876	-0.148843	0.881677	1	FALSE
AC004754.3	2.42696	-0.089955	0.172544	-0.521344	0.602127	1	FALSE
AC004854.4	0.910282	-0.0670451	0.123004	-0.545063	0.585711	1	FALSE
AC004893.11	45.7826	0.0645614	0.301328	0.214256	0.830347	1	FALSE
AC004920.2	0.747496	0.0302121	0.096056	0.314526	0.753122	1	FALSE
AC004938.5	0.292465	-0.0432605	0.0747468	-0.57876	0.562751	1	FALSE
AC004941.5	0.418964	0.0214722	0.0747468	0.287265	0.773909	1	FALSE
AC004951.5	9.89702	-0.173587	0.281486	-0.61668	0.537446	1	FALSE
AC004951.6	5.78283	0.0485284	0.241488	0.200956	0.840733	1	FALSE
AC004967.7	54.2954	0.617838	0.302118	2.04502	0.0408529	1	FALSE
AC004980.10	0.355487	0.0430497	0.0747468	0.575941	0.564655	1	FALSE
AC004980.7	25.949	0.220932	0.307162	0.71927	0.471975	1	FALSE
AC004985.12	1.08032	-0.0307623	0.136084	-0.226053	0.82116	1	FALSE
AC004987.9	58.3317	0.299043	0.295166	1.01313	0.310996	1	FALSE
AC005009.1	3.20731	-0.0503121	0.191745	-0.26239	0.79302	1	FALSE
AC005009.2	9.06205	0.0950366	0.27258	0.348656	0.727347	1	FALSE
AC005013.5	1.37979	-0.105592	0.157414	-0.670793	0.502352	1	FALSE
AC005014.5	3.45604	-0.117376	0.205244	-0.571887	0.567399	1	FALSE
AC005017.2	1.352	0.0150625	0.125604	0.11992	0.904546	1	FALSE
AC005019.2	7.64716	0.00239383	0.214894	0.0111396	0.991112	1	FALSE
AC005037.3	4.76191	0.110981	0.211631	0.524408	0.599995	1	FALSE
AC005042.2	1.12599	0.0964451	0.133886	0.720352	0.471308	1	FALSE
AC005062.2	327.668	0.0297414	0.274806	0.108227	0.913816	1	FALSE
AC005076.5	23.3797	0.198212	0.304631	0.650663	0.515264	1	FALSE
AC005077.14	29.3051	0.521393	0.305287	1.70788	0.087659	1	FALSE
AC005077.7	2.20636	-0.177045	0.174113	-1.01684	0.30923	1	FALSE
AC005077.8	0.260469	0	0.0747468	0	1	1	FALSE
AC005082.12	1.56526	0.000154579	0.14193	0.00108912	0.999131	1	FALSE
AC005083.1	2.6669	-0.112636	0.173042	-0.650915	0.515102	1	FALSE
AC005102.1	1.19763	-0.0479308	0.11374	-0.421405	0.673459	1	FALSE
AC005150.1	0.306594	-0.0216829	0.0747468	-0.290085	0.771751	1	FALSE
AC005154.6	305.991	0.206675	0.302856	0.68242	0.494973	1	FALSE
AC005154.7	2.56803	0.0609513	0.183125	0.33284	0.739255	1	FALSE
AC005189.6	0.260469	0	0.0747468	0	1	1	FALSE
AC005220.3	3.30197	-0.0376017	0.214211	-0.175535	0.860659	1	FALSE
AC005224.2	14.0098	-0.30228	0.297623	-1.01564	0.309799	1	FALSE
AC005229.5	0.362785	-0.0216829	0.0747468	-0.290085	0.771751	1	FALSE
AC005251.3	2.75705	0.0971668	0.197284	0.492521	0.622351	1	FALSE
AC005253.2	2.28268	-0.0243535	0.176441	-0.138027	0.890219	1	FALSE
AC005253.4	1.10068	0.0348806	0.110757	0.314929	0.752816	1	FALSE
AC005255.3	1.95073	-0.123912	0.171464	-0.722669	0.469883	1	FALSE
AC005256.1	1.38404	-0.0692477	0.131902	-0.524994	0.599588	1	FALSE
AC005262.2	0.399093	0.0382309	0.0750875	0.509151	0.610646	1	FALSE
AC005262.4	10.3564	0.572119	0.248464	2.30262	0.0213002	1	FALSE
AC005276.1	37.2207	0.445806	0.307872	1.44802	0.147611	1	FALSE
AC005300.5	0.260469	0	0.0747468	0	1	1	FALSE
AC005301.9	0.783813	-0.0352058	0.0988384	-0.356196	0.721694	1	FALSE
AC005306.3	37.0735	0.361462	0.307896	1.17397	0.240406	1	FALSE
AC005307.1	5.52666	-0.0587581	0.233042	-0.252135	0.800937	1	FALSE
AC005307.3	6.84664	-0.000692275	0.220293	-0.00314253	0.997493	1	FALSE
AC005307.4	0.401231	-0.0216829	0.0747468	-0.290085	0.771751	1	FALSE
AC005307.5	16.6505	-0.00839273	0.297709	-0.028191	0.97751	1	FALSE
AC005324.6	0.262677	-0.0216829	0.0747468	-0.290085	0.771751	1	FALSE
AC005329.7	62.4227	0.00526926	0.307805	0.0171188	0.986342	1	FALSE
AC005336.5	0.259801	0.0214722	0.0747468	0.287265	0.773909	1	FALSE
AC005339.2	1.14943	0.00911286	0.120221	0.0758007	0.939578	1	FALSE
AC005355.1	1.15389	7.53804e-05	0.139865	0.00053895	0.99957	1	FALSE
AC005355.2	0.81382	0.0796573	0.099813	0.798065	0.424833	1	FALSE
AC005355.3	0.307296	-0.0216829	0.0747468	-0.290085	0.771751	1	FALSE
AC005363.11	1.95374	0.0910873	0.167581	0.543541	0.586758	1	FALSE
AC005394.1	0.717568	0.0390352	0.112598	0.346677	0.728834	1	FALSE
AC005477.1	0.664613	-0.0517884	0.0920154	-0.562823	0.573555	1	FALSE
AC005480.1	1.07271	0.0713248	0.138383	0.515414	0.606263	1	FALSE
AC005481.5	5.86513	-0.100716	0.217316	-0.463452	0.64304	1	FALSE
AC005498.3	1.84997	-0.0410119	0.161346	-0.254186	0.799352	1	FALSE
AC005517.3	5.81194	-0.16365	0.209819	-0.779957	0.435416	1	FALSE
AC005519.4	116.627	0.116983	0.300467	0.389338	0.697026	1	FALSE
AC005522.6	0.462188	-0.0228631	0.0820282	-0.278722	0.780458	1	FALSE
AC005523.2	2.78209	-0.00834664	0.166728	-0.0500615	0.960073	1	FALSE
AC005523.3	0.707572	0.0418375	0.0967684	0.432347	0.665489	1	FALSE
AC005532.5	1.16619	0.116158	0.127917	0.908073	0.363839	1	FALSE
AC005534.6	0.658471	-0.0238872	0.0933542	-0.255877	0.798046	1	FALSE
AC005534.8	2.5129	0.00889462	0.189705	0.0468866	0.962604	1	FALSE
AC005537.2	1.21602	0.0349757	0.126413	0.276677	0.782028	1	FALSE
AC005539.2	0.198878	0.0430497	0.0747468	0.575941	0.564655	1	FALSE
AC005540.3	2.26057	-0.00769563	0.165436	-0.0465173	0.962898	1	FALSE
AC005546.2	2.52613	-0.00485756	0.151127	-0.0321422	0.974359	1	FALSE
AC005562.1	24.1401	0.362623	0.304306	1.19164	0.233404	1	FALSE
AC005578.3	3.48037	0.0366704	0.188154	0.194896	0.845475	1	FALSE
AC005592.1	13.2295	-0.096731	0.287638	-0.336295	0.736649	1	FALSE
AC005592.2	37.4668	-0.111372	0.306634	-0.363209	0.716448	1	FALSE
AC005592.3	1.23802	0.108211	0.12565	0.861205	0.389125	1	FALSE
AC005593.2	1.21572	0.0439884	0.127769	0.344282	0.730635	1	FALSE
AC005606.14	3.4013	-0.107466	0.209094	-0.513961	0.607279	1	FALSE
AC005606.15	0.300322	0	0.0747468	0	1	1	FALSE
AC005609.16	15.1603	0.231822	0.298921	0.775529	0.438027	1	FALSE
AC005609.18	9.4054	-0.0813418	0.273509	-0.2974	0.766161	1	FALSE
AC005609.19	0.805049	-0.0252944	0.110044	-0.229858	0.818202	1	FALSE
AC005609.20	3.51872	-0.0847221	0.211259	-0.401034	0.688395	1	FALSE
AC005616.1	0.354437	0.0214722	0.0747468	0.287265	0.773909	1	FALSE
AC005618.6	15.9076	0.0560295	0.296436	0.189011	0.850084	1	FALSE
AC005624.2	4.0576	-0.0919768	0.2261	-0.406797	0.684157	1	FALSE
AC005682.5	271.685	0.0376299	0.279545	0.134611	0.892919	1	FALSE
AC005682.6	0.725592	0.0356802	0.09666	0.369131	0.71203	1	FALSE
AC005740.3	0.25538	0.0430497	0.0747468	0.575941	0.564655	1	FALSE
AC005740.4	3.1468	0.0592823	0.163526	0.362526	0.716959	1	FALSE
AC005740.6	2.08871	0.0316766	0.165563	0.191327	0.848269	1	FALSE
AC005753.1	2.332	0.0535053	0.156132	0.342693	0.73183	1	FALSE
AC005754.8	8.44512	-0.223171	0.265668	-0.840039	0.400886	1	FALSE
AC005775.2	3.16632	0.0332077	0.201711	0.164631	0.869235	1	FALSE
AC005776.1	2.48939	0.122785	0.162963	0.753452	0.451178	1	FALSE
AC005780.1	10.7202	0.0472621	0.278479	0.169715	0.865234	1	FALSE
AC005785.2	3.93128	0.0886727	0.214973	0.412483	0.679985	1	FALSE
AC005785.5	5.9292	0.289901	0.230462	1.25791	0.208423	1	FALSE
AC005786.3	0.511047	0.0281625	0.0845449	0.333107	0.739053	1	FALSE
AC005786.6	0.516518	0.0232171	0.0767864	0.302359	0.762378	1	FALSE
AC005786.7	7.85987	-0.0328796	0.255166	-0.128856	0.897472	1	FALSE
AC005795.1	6.7572	-0.0398735	0.259751	-0.153507	0.877999	1	FALSE
AC005822.1	3.12951	0.1801	0.199344	0.903462	0.366281	1	FALSE
AC005915.1	0.250578	0.0214722	0.0747468	0.287265	0.773909	1	FALSE
AC005932.1	0.561626	-0.000753009	0.096009	-0.00784311	0.993742	1	FALSE
AC005943.6	1.89323	0.066749	0.121683	0.548546	0.583317	1	FALSE
AC005944.2	10.2359	0.157585	0.227911	0.691434	0.489293	1	FALSE
AC005954.3	1.51778	-0.0376947	0.131666	-0.28629	0.774656	1	FALSE
AC005954.4	0.399093	0.0382309	0.0750875	0.509151	0.610646	1	FALSE
AC006000.5	5.0593	-0.153848	0.228927	-0.67204	0.501558	1	FALSE
AC006026.13	5.53347	0.142046	0.204171	0.695717	0.486606	1	FALSE
AC006026.9	1.38729	0.0809811	0.138884	0.583083	0.559837	1	FALSE
AC006028.11	0.396465	-0.0216829	0.0747468	-0.290085	0.771751	1	FALSE
AC006042.7	0.800143	-0.0582146	0.101829	-0.571691	0.567532	1	FALSE
AC006042.8	1.80756	-0.0333437	0.125797	-0.265059	0.790964	1	FALSE
AC006077.3	11.8384	0.503655	0.260585	1.93278	0.0532632	1	FALSE
AC006116.12	0.240869	-0.0216829	0.0747468	-0.290085	0.771751	1	FALSE
AC006116.13	0.254999	0	0.0747468	0	1	1	FALSE
AC006116.14	0.445886	-0.00260507	0.0751782	-0.034652	0.972357	1	FALSE
AC006116.15	1.5783	-0.0347101	0.135214	-0.256704	0.797407	1	FALSE
AC006116.17	2.42603	0.0658315	0.182025	0.361661	0.717606	1	FALSE
AC006116.21	0.402281	-0.000105368	0.0747468	-0.00140967	0.998875	1	FALSE
AC006116.22	1.43061	0.0843634	0.148191	0.569289	0.56916	1	FALSE
AC006116.24	2.23834	0.0404023	0.167181	0.241668	0.809038	1	FALSE
AC006116.27	2.86953	0.00382747	0.184604	0.0207334	0.983458	1	FALSE
AC006128.2	5.79118	-0.0530334	0.245971	-0.215608	0.829293	1	FALSE
AC006129.2	0.925244	-0.0971762	0.115858	-0.838755	0.401607	1	FALSE
AC006160.5	1.39832	0.0674983	0.152094	0.443793	0.657192	1	FALSE
AC006195.2	0.35924	0.0430497	0.0747468	0.575941	0.564655	1	FALSE
AC006262.10	0.673653	0.028885	0.0925259	0.312183	0.754901	1	FALSE
AC006262.11	1.64477	0.112834	0.147779	0.763532	0.445146	1	FALSE
AC006262.5	3.2917	0.00493998	0.188556	0.026199	0.979099	1	FALSE
AC006262.6	5.53956	-0.0503299	0.240051	-0.209663	0.83393	1	FALSE
AC006272.2	0.471899	0.0214722	0.0747468	0.287265	0.773909	1	FALSE
AC006273.4	12.5617	0.474065	0.283711	1.67094	0.0947328	1	FALSE
AC006273.5	91.9629	-0.050206	0.307893	-0.163063	0.870469	1	FALSE
AC006277.2	2.97348	-0.168967	0.187603	-0.900665	0.367766	1	FALSE
AC006355.3	0.240869	-0.0216829	0.0747468	-0.290085	0.771751	1	FALSE
AC006369.2	1.21193	0.0289046	0.136535	0.211701	0.83234	1	FALSE
AC006369.3	0.194076	0.0214722	0.0747468	0.287265	0.773909	1	FALSE
AC006372.4	1.01978	0.0645611	0.128818	0.501181	0.616244	1	FALSE
AC006372.6	1.20392	0.0279346	0.113413	0.246309	0.805443	1	FALSE
AC006445.6	0.340977	-0.0216829	0.0747468	-0.290085	0.771751	1	FALSE
AC006445.7	0.302174	-0.000105368	0.0747468	-0.00140967	0.998875	1	FALSE
AC006449.2	0.194076	0.0214722	0.0747468	0.287265	0.773909	1	FALSE
AC006486.10	0.975302	-0.0679266	0.126208	-0.538213	0.59043	1	FALSE
AC006509.4	0.705791	0.031079	0.0956109	0.325057	0.745138	1	FALSE
AC006509.7	1.21698	-0.00142957	0.12693	-0.0112627	0.991014	1	FALSE
AC006538.1	14.6792	-0.453574	0.281473	-1.61143	0.107086	1	FALSE
AC006538.8	0.398424	0.0566567	0.0750923	0.754495	0.450552	1	FALSE
AC006539.2	0.359908	0.0214722	0.0747468	0.287265	0.773909	1	FALSE
AC006547.13	0.200215	0	0.0747468	0	1	1	FALSE
AC006547.15	0.40043	0	0.075017	0	1	1	FALSE
AC006547.8	2.19068	-0.0766146	0.169104	-0.453061	0.650505	1	FALSE
AC006548.28	3.46738	-0.333221	0.212915	-1.56504	0.117573	1	FALSE
AC006942.4	0.707224	0.0170525	0.0950369	0.17943	0.8576	1	FALSE
AC006946.15	3.97537	0.166623	0.212376	0.784568	0.432707	1	FALSE
AC006946.16	0.354437	0.0214722	0.0747468	0.287265	0.773909	1	FALSE
AC006978.6	79.7006	0.124312	0.305836	0.406467	0.6844	1	FALSE
AC006994.2	2.1598	-0.173016	0.175079	-0.988215	0.323047	1	FALSE
AC006994.3	0.301826	-0.0216829	0.0747468	-0.290085	0.771751	1	FALSE
AC007016.3	1.01137	-0.0014575	0.119433	-0.0122036	0.990263	1	FALSE
AC007036.4	0.255703	0	0.0747468	0	1	1	FALSE
AC007038.7	6.79553	0.041614	0.231141	0.180038	0.857123	1	FALSE
AC007041.2	12.9161	-0.120707	0.292505	-0.412667	0.67985	1	FALSE
AC007091.1	2.89204	0.0720966	0.196265	0.367343	0.713363	1	FALSE
AC007106.1	7.83423	-0.337405	0.269158	-1.25356	0.210002	1	FALSE
AC007128.1	15.0549	0.0340626	0.252509	0.134897	0.892694	1	FALSE
AC007131.1	0.306594	-0.0216829	0.0747468	-0.290085	0.771751	1	FALSE
AC007163.6	0.645887	-0.0913873	0.0839115	-1.08909	0.276114	1	FALSE
AC007182.6	0.751845	0.0111161	0.0974301	0.114093	0.909164	1	FALSE
AC007191.4	127.696	0.000704801	0.307005	0.00229573	0.998168	1	FALSE
AC007192.4	0.25538	0.0430497	0.0747468	0.575941	0.564655	1	FALSE
AC007193.6	0.469866	-0.0377046	0.0752389	-0.501131	0.616279	1	FALSE
AC007193.8	0.553636	-0.0408671	0.0784376	-0.521014	0.602357	1	FALSE
AC007204.2	1.44649	0.0616749	0.146766	0.420227	0.67432	1	FALSE
AC007228.11	16.9366	0.0641333	0.298679	0.214723	0.829983	1	FALSE
AC007228.9	34.7624	-0.102823	0.307086	-0.334833	0.737751	1	FALSE
AC007229.3	4.37073	-0.00474341	0.223727	-0.0212018	0.983085	1	FALSE
AC007237.2	0.454545	0.022758	0.0815441	0.279088	0.780177	1	FALSE
AC007238.1	51.7127	-0.000306168	0.300272	-0.00101964	0.999186	1	FALSE
AC007246.3	25.7725	0.17508	0.307754	0.568896	0.569427	1	FALSE
AC007249.3	8.7842	0.0316346	0.265395	0.119198	0.905118	1	FALSE
AC007250.4	0.423039	-0.0216829	0.0747468	-0.290085	0.771751	1	FALSE
AC007255.8	8.12898	0.0369233	0.264862	0.139406	0.889129	1	FALSE
AC007256.5	2.42284	-0.13759	0.178709	-0.769913	0.441352	1	FALSE
AC007272.3	0.392953	0.0570228	0.0750707	0.759587	0.447501	1	FALSE
AC007277.3	5.54313	-0.110181	0.242767	-0.453854	0.649934	1	FALSE
AC007278.3	0.675161	0.0175712	0.0835989	0.210185	0.833523	1	FALSE
AC007279.2	0.717222	-0.00171991	0.112361	-0.0153069	0.987787	1	FALSE
AC007283.4	0.240869	-0.0216829	0.0747468	-0.290085	0.771751	1	FALSE
AC007285.6	1.39452	0.0257098	0.136925	0.187765	0.851061	1	FALSE
AC007292.3	2.09958	0.0447795	0.116105	0.38568	0.699734	1	FALSE
AC007292.6	30.0297	0.145087	0.307278	0.472167	0.636807	1	FALSE
AC007292.7	17.265	0.189917	0.302213	0.62842	0.529729	1	FALSE
AC007318.5	61.8545	0.629111	0.307795	2.04393	0.0409606	1	FALSE
AC007319.1	1.22474	-0.0360037	0.133612	-0.269464	0.787573	1	FALSE
AC007325.2	91.2287	0.517315	0.307079	1.68463	0.0920594	1	FALSE
AC007325.4	7.37239	0.095038	0.253799	0.374462	0.708061	1	FALSE
AC007326.1	13.2832	0.0105955	0.293155	0.0361431	0.971168	1	FALSE
AC007362.3	0.640066	0.0248528	0.0823941	0.301633	0.762932	1	FALSE
AC007365.3	2.57787	0.0953599	0.161055	0.592095	0.553787	1	FALSE
AC007365.4	0.989956	0.0638302	0.115421	0.55302	0.58025	1	FALSE
AC007383.3	326.435	0.182381	0.283894	0.642426	0.520597	1	FALSE
AC007383.6	1.1257	-0.0116292	0.123132	-0.0944444	0.924756	1	FALSE
AC007386.3	0.61746	0.0348127	0.0987072	0.352687	0.724323	1	FALSE
AC007389.1	0.250578	0.0214722	0.0747468	0.287265	0.773909	1	FALSE
AC007389.2	0.240869	-0.0216829	0.0747468	-0.290085	0.771751	1	FALSE
AC007390.4	0.263023	-0.000105368	0.0747468	-0.00140967	0.998875	1	FALSE
AC007391.2	1.14361	0.0418633	0.116811	0.358385	0.720055	1	FALSE
AC007403.2	0.256049	0.0214722	0.0747468	0.287265	0.773909	1	FALSE
AC007405.4	13.2191	0.0612251	0.289139	0.21175	0.832302	1	FALSE
AC007405.6	239.106	0.726041	0.292448	2.48263	0.0130417	1	FALSE
AC007405.8	2.23953	0.192982	0.18038	1.06986	0.284682	1	FALSE
AC007563.5	0.599761	-0.0659116	0.0813172	-0.810549	0.417624	1	FALSE
AC007566.10	9.5843	-0.048567	0.264686	-0.183489	0.854414	1	FALSE
AC007568.1	0.620337	-0.0148423	0.0903634	-0.164252	0.869533	1	FALSE
AC007620.3	1.35316	-0.00784422	0.119275	-0.0657657	0.947564	1	FALSE
AC007679.1	0.3088	-0.0432605	0.0747468	-0.57876	0.562751	1	FALSE
AC007682.1	261.787	-0.183725	0.264126	-0.695595	0.486682	1	FALSE
AC007743.1	2.04884	-0.139176	0.151304	-0.919848	0.357652	1	FALSE
AC007773.2	17.4372	0.148354	0.293925	0.504734	0.613746	1	FALSE
AC007790.4	1.97696	0.0392748	0.178741	0.219731	0.826081	1	FALSE
AC007879.1	0.883543	0.0571136	0.100931	0.565866	0.571485	1	FALSE
AC007879.2	2.37542	0.0842604	0.189013	0.445792	0.655748	1	FALSE
AC007879.4	3.77324	0.0591958	0.223661	0.264668	0.791265	1	FALSE
AC007879.5	1.18876	0.0601023	0.122235	0.491697	0.622934	1	FALSE
AC007879.7	0.556192	0.0205282	0.0873257	0.235077	0.814149	1	FALSE
AC007880.1	0.778872	0.0690775	0.108186	0.63851	0.523142	1	FALSE
AC007950.2	2.32589	0.0434766	0.187535	0.231832	0.816669	1	FALSE
AC007952.5	8.08747	0.00337284	0.258798	0.0130327	0.989602	1	FALSE
AC007966.1	0.250232	0	0.0747468	0	1	1	FALSE
AC007969.4	0.815158	0.0421905	0.101231	0.416777	0.676842	1	FALSE
AC007969.5	279.277	0.301127	0.188776	1.59515	0.110678	1	FALSE
AC008060.7	1.7764	-0.0732831	0.156145	-0.469328	0.638835	1	FALSE
AC008065.1	2.43274	0.0526149	0.159555	0.32976	0.741581	1	FALSE
AC008074.1	0.408239	-0.0201778	0.0751529	-0.26849	0.788322	1	FALSE
AC008074.3	1.67197	-0.0591334	0.158291	-0.373573	0.708722	1	FALSE
AC008074.5	0.250578	0.0214722	0.0747468	0.287265	0.773909	1	FALSE
AC008079.10	0.976188	0.0221425	0.110122	0.201073	0.840642	1	FALSE
AC008088.4	19.629	0.424208	0.305252	1.3897	0.164621	1	FALSE
AC008155.1	6.01039	0.206144	0.224631	0.917701	0.358776	1	FALSE
AC008269.2	1.395	-0.0160891	0.141516	-0.113691	0.909483	1	FALSE
AC008271.1	0.200215	0	0.0747468	0	1	1	FALSE
AC008277.1	0.199546	0.0214722	0.0747468	0.287265	0.773909	1	FALSE
AC008280.1	0.430143	-0.0211411	0.0750688	-0.281624	0.778232	1	FALSE
AC008427.2	1.18483	-0.106041	0.135131	-0.784726	0.432614	1	FALSE
AC008440.10	0.201718	-0.0216829	0.0747468	-0.290085	0.771751	1	FALSE
AC008440.5	1.34685	-0.00599817	0.109538	-0.0547589	0.956331	1	FALSE
AC008522.1	4.56344	0.0243372	0.223076	0.109098	0.913125	1	FALSE
AC008592.3	2.12959	-0.00189869	0.156852	-0.012105	0.990342	1	FALSE
AC008592.8	0.751952	0.0308532	0.114107	0.270387	0.786863	1	FALSE
AC008694.2	0.396465	-0.0216829	0.0747468	-0.290085	0.771751	1	FALSE
AC008697.1	3.28644	-0.0578326	0.205729	-0.281111	0.778625	1	FALSE
AC008746.12	8.33962	0.28511	0.248986	1.14508	0.252175	1	FALSE
AC008746.3	2.64733	0.0440849	0.164577	0.267868	0.788801	1	FALSE
AC008753.3	10.8852	-0.0322947	0.280708	-0.115047	0.908408	1	FALSE
AC008753.4	7.66655	0.492248	0.251372	1.95825	0.050201	1	FALSE
AC008753.6	1.41755	0.0316803	0.151013	0.209785	0.833835	1	FALSE
AC008759.1	0.548166	-0.0504333	0.0869729	-0.579873	0.562	1	FALSE
AC008781.7	0.857182	-0.00144173	0.110782	-0.0130142	0.989617	1	FALSE
AC008834.1	33.6964	0.104799	0.307702	0.340588	0.733414	1	FALSE
AC008850.3	0.854232	-0.0284522	0.120081	-0.236941	0.812703	1	FALSE
AC008982.2	17.9039	0.160834	0.302748	0.531247	0.595248	1	FALSE
AC008992.1	0.452296	0.00247263	0.0751654	0.0328959	0.973758	1	FALSE
AC009005.2	150.518	0.210753	0.282404	0.746282	0.455497	1	FALSE
AC009065.1	3.83501	0.053866	0.160378	0.335869	0.73697	1	FALSE
AC009120.11	2.23729	-0.0031221	0.184292	-0.016941	0.986484	1	FALSE
AC009120.3	21.2873	0.30302	0.299597	1.01143	0.311812	1	FALSE
AC009120.4	1.72575	0.0521208	0.153986	0.338477	0.735003	1	FALSE
AC009120.5	1.92463	0.0473124	0.174883	0.270538	0.786747	1	FALSE
AC009120.6	101.583	0.356266	0.294694	1.20894	0.226687	1	FALSE
AC009120.8	1.37006	-0.0505224	0.134884	-0.374563	0.707986	1	FALSE
AC009133.12	18.6203	-0.117305	0.284128	-0.412861	0.679709	1	FALSE
AC009133.15	10.1018	0.154969	0.228703	0.677597	0.498027	1	FALSE
AC009133.17	66.8072	0.462735	0.307515	1.50476	0.132386	1	FALSE
AC009133.21	7.17124	-0.0756501	0.259748	-0.291244	0.770865	1	FALSE
AC009166.7	0.566429	0.0206732	0.0878716	0.235266	0.814003	1	FALSE
AC009229.6	0.201718	-0.0216829	0.0747468	-0.290085	0.771751	1	FALSE
AC009245.3	6.64586	-0.018992	0.238768	-0.0795419	0.936602	1	FALSE
AC009262.2	2.00643	0.00968113	0.152786	0.0633639	0.949477	1	FALSE
AC009264.1	2.48654	-0.0671178	0.192192	-0.349223	0.726922	1	FALSE
AC009274.6	1.1289	0.0516014	0.120684	0.427573	0.668962	1	FALSE
AC009299.2	3.96675	0.0428067	0.224864	0.190367	0.849022	1	FALSE
AC009299.3	118.613	-0.100298	0.275985	-0.363418	0.716292	1	FALSE
AC009299.5	0.761521	0.0518914	0.107567	0.482408	0.629516	1	FALSE
AC009303.2	20.6616	-0.00981679	0.305755	-0.0321067	0.974387	1	FALSE
AC009312.1	6.76233	-0.105476	0.247078	-0.426891	0.669459	1	FALSE
AC009362.2	3.36468	-0.184814	0.201869	-0.915514	0.359922	1	FALSE
AC009403.2	55.2362	-0.345486	0.301608	-1.14548	0.25201	1	FALSE
AC009404.2	59.2302	0.611325	0.306864	1.99217	0.0463521	1	FALSE
AC009411.2	0.302174	-0.000105368	0.0747468	-0.00140967	0.998875	1	FALSE
AC009413.2	2.26718	-0.033372	0.179971	-0.18543	0.852892	1	FALSE
AC009414.1	0.20652	-0.000105368	0.0747468	-0.00140967	0.998875	1	FALSE
AC009473.1	6.46625	-0.132568	0.252493	-0.525035	0.599559	1	FALSE
AC009487.4	0.299654	0.0214722	0.0747468	0.287265	0.773909	1	FALSE
AC009487.6	10.8456	-0.131247	0.285601	-0.459545	0.645843	1	FALSE
AC009495.2	1.10569	0.0449826	0.119932	0.375067	0.707611	1	FALSE
AC009495.3	0.357659	-0.000105368	0.0747468	-0.00140967	0.998875	1	FALSE
AC009501.4	12.3049	-0.329463	0.285879	-1.15246	0.249133	1	FALSE
AC009502.4	0.194076	0.0214722	0.0747468	0.287265	0.773909	1	FALSE
AC009505.2	0.755917	0.041317	0.0883297	0.467759	0.639957	1	FALSE
AC009506.1	42.5129	0.0746275	0.307342	0.242816	0.808148	1	FALSE
AC009517.2	0.876245	-0.0294761	0.121637	-0.242329	0.808525	1	FALSE
AC009518.4	0.805266	0.0845503	0.109784	0.770153	0.441209	1	FALSE
AC009531.2	0.194744	0	0.0747468	0	1	1	FALSE
AC009784.3	0.198878	0.0430497	0.0747468	0.575941	0.564655	1	FALSE
AC009945.4	0.260469	0	0.0747468	0	1	1	FALSE
AC009948.5	218.887	-0.00537976	0.29365	-0.0183203	0.985383	1	FALSE
AC009948.7	7.03089	-0.104204	0.258356	-0.403336	0.686701	1	FALSE
AC009950.2	0.668675	-0.0519311	0.0922579	-0.562891	0.573509	1	FALSE
AC009955.8	3.12451	-0.138927	0.181068	-0.76726	0.442927	1	FALSE
AC009961.2	1.90879	0.0393588	0.148967	0.264212	0.791616	1	FALSE
AC009961.3	11.8178	0.00965421	0.288981	0.0334078	0.973349	1	FALSE
AC009963.5	0.513115	-0.0279005	0.084804	-0.329	0.742156	1	FALSE
AC010091.1	0.311537	0.0214722	0.0747468	0.287265	0.773909	1	FALSE
AC010095.6	0.439747	0.015839	0.0751679	0.210715	0.83311	1	FALSE
AC010132.11	0.245671	-0.000105368	0.0747468	-0.00140967	0.998875	1	FALSE
AC010136.2	1.00475	-0.0822176	0.107832	-0.762459	0.445786	1	FALSE
AC010148.1	1.35697	0.100018	0.149989	0.666837	0.504876	1	FALSE
AC010150.1	1.85421	0.0922099	0.142849	0.645506	0.518599	1	FALSE
AC010226.4	0.691316	-0.0295455	0.0949245	-0.311253	0.755608	1	FALSE
AC010240.2	26.0627	-0.169322	0.262555	-0.644903	0.51899	1	FALSE
AC010240.3	0.462536	-0.000105368	0.0747468	-0.00140967	0.998875	1	FALSE
AC010468.1	5.87869	-0.0973489	0.241302	-0.403431	0.686631	1	FALSE
AC010492.2	3.27882	0.00902327	0.204058	0.0442191	0.96473	1	FALSE
AC010504.2	2.16357	-0.151042	0.175099	-0.862612	0.388351	1	FALSE
AC010524.2	0.420831	0	0.0747468	0	1	1	FALSE
AC010547.9	0.296355	-0.0216829	0.0747468	-0.290085	0.771751	1	FALSE
AC010642.1	7.67613	-0.00285552	0.262295	-0.0108867	0.991314	1	FALSE
AC010677.5	1.5146	-0.0910346	0.149082	-0.610634	0.541442	1	FALSE
AC010729.1	5.21899	-0.0981186	0.242239	-0.405048	0.685442	1	FALSE
AC010729.2	13.3596	-0.15675	0.284369	-0.551222	0.581481	1	FALSE
AC010731.4	0.36208	-0.0216829	0.0747468	-0.290085	0.771751	1	FALSE
AC010733.5	1.93896	-0.0860751	0.158543	-0.542914	0.587189	1	FALSE
AC010761.10	1.00738	-0.00104621	0.0986414	-0.0106062	0.991538	1	FALSE
AC010761.14	0.467133	0.0214722	0.0747468	0.287265	0.773909	1	FALSE
AC010761.6	1.17207	0.0145385	0.125132	0.116186	0.907505	1	FALSE
AC010761.8	2.98623	-0.0379943	0.179733	-0.211393	0.832581	1	FALSE
AC010761.9	1.30006	0.0249625	0.098089	0.254489	0.799118	1	FALSE
AC010878.3	2.60743	-0.243573	0.185182	-1.31532	0.188403	1	FALSE
AC010883.5	4.40872	-0.108963	0.232144	-0.469376	0.638801	1	FALSE
AC010884.1	5.08271	0.0481145	0.237	0.203015	0.839123	1	FALSE
AC010890.1	2.44401	0.0653875	0.183075	0.357163	0.72097	1	FALSE
AC010894.3	13.4547	0.0795058	0.289454	0.274675	0.783566	1	FALSE
AC010894.4	0.194744	0	0.0747468	0	1	1	FALSE
AC010900.2	5.22553	0.0777663	0.229182	0.339322	0.734367	1	FALSE
AC010967.2	0.814489	0.0614811	0.100667	0.610736	0.541374	1	FALSE
AC010976.2	0.200215	0	0.0747468	0	1	1	FALSE
AC010983.1	0.411644	0.0214722	0.0747468	0.287265	0.773909	1	FALSE
AC011043.1	29.7431	0.145329	0.307648	0.472386	0.636651	1	FALSE
AC011286.1	1.79414	0.0813849	0.151771	0.536233	0.591797	1	FALSE
AC011290.4	1.10197	0.0845094	0.123081	0.686616	0.492324	1	FALSE
AC011290.5	1.67099	0.0583236	0.131496	0.443539	0.657376	1	FALSE
AC011298.2	2.09379	0.0479943	0.178821	0.268393	0.788397	1	FALSE
AC011330.13	0.622931	0.0351542	0.0993305	0.353911	0.723406	1	FALSE
AC011380.8	1.0291	0.0825593	0.134718	0.61283	0.539989	1	FALSE
AC011551.3	1.15879	0.0390835	0.122358	0.31942	0.749408	1	FALSE
AC011558.5	1.91136	-0.053999	0.151106	-0.357357	0.720824	1	FALSE
AC011747.3	0.401933	-0.019563	0.0750934	-0.260515	0.794466	1	FALSE
AC011747.4	2.16129	-0.0393879	0.182444	-0.215891	0.829073	1	FALSE
AC011753.6	0.263023	-0.000105368	0.0747468	-0.00140967	0.998875	1	FALSE
AC011841.1	0.189273	0	0.0747468	0	1	1	FALSE
AC011933.2	0.455213	0	0.0751052	0	1	1	FALSE
AC011997.1	0.263023	-0.000105368	0.0747468	-0.00140967	0.998875	1	FALSE
AC011998.4	1.05322	0.0303849	0.11135	0.272876	0.784949	1	FALSE
AC011999.1	0.612313	-0.0232973	0.0906391	-0.257034	0.797153	1	FALSE
AC012065.5	0.393622	0.0383589	0.0750763	0.510932	0.609398	1	FALSE
AC012066.1	2.14373	0.0605456	0.181049	0.334415	0.738067	1	FALSE
AC012074.2	2.3743	0.038546	0.174111	0.221388	0.82479	1	FALSE
AC012123.1	0.613365	0.000651252	0.0803429	0.0081059	0.993532	1	FALSE
AC012146.7	141.736	0.387198	0.286514	1.35141	0.176564	1	FALSE
AC012314.20	0.200215	0	0.0747468	0	1	1	FALSE
AC012314.8	20.3132	0.0197754	0.303156	0.0652317	0.94799	1	FALSE
AC012354.6	12.0251	-0.129129	0.280154	-0.46092	0.644856	1	FALSE
AC012354.8	10.0106	0.0650495	0.269751	0.241146	0.809442	1	FALSE
AC012358.4	4.99353	0.0238785	0.230479	0.103604	0.917484	1	FALSE
AC012358.7	1.88894	0.121534	0.166237	0.731084	0.464728	1	FALSE
AC012358.8	1.44839	-0.141518	0.151584	-0.933597	0.350512	1	FALSE
AC012360.4	1.13755	0.0700387	0.120359	0.581913	0.560625	1	FALSE
AC012360.6	0.369759	-0.0432605	0.0747468	-0.57876	0.562751	1	FALSE
AC012363.4	3.94508	-0.0279911	0.226338	-0.123669	0.901577	1	FALSE
AC012368.1	8.16244	0.146818	0.266812	0.550269	0.582135	1	FALSE
AC012370.2	0.207189	-0.0216829	0.0747468	-0.290085	0.771751	1	FALSE
AC012442.5	2.05245	0.136753	0.17286	0.791118	0.428875	1	FALSE
AC012442.6	3.2904	0.00853079	0.209285	0.0407615	0.967486	1	FALSE
AC012456.4	0.199546	0.0214722	0.0747468	0.287265	0.773909	1	FALSE
AC012462.1	0.867203	0.0590923	0.102754	0.575084	0.565235	1	FALSE
AC012462.2	1.93507	-0.0460343	0.164866	-0.279222	0.780074	1	FALSE
AC012485.2	1.00818	-0.0385828	0.127853	-0.301776	0.762823	1	FALSE
AC012493.1	0.647388	0.0257303	0.0823251	0.312545	0.754627	1	FALSE
AC012499.1	0.240869	-0.0216829	0.0747468	-0.290085	0.771751	1	FALSE
AC012501.2	1.81519	0.0321028	0.162582	0.197456	0.843471	1	FALSE
AC012501.3	30.4148	0.547711	0.307698	1.78003	0.0750712	1	FALSE
AC012506.4	0.267443	-0.0216829	0.0747468	-0.290085	0.771751	1	FALSE
AC012512.1	0.263023	-0.000105368	0.0747468	-0.00140967	0.998875	1	FALSE
AC012668.1	0.311537	0.0214722	0.0747468	0.287265	0.773909	1	FALSE
AC012668.2	16.1521	-0.22471	0.297734	-0.754734	0.450409	1	FALSE
AC013267.1	0.194076	0.0214722	0.0747468	0.287265	0.773909	1	FALSE
AC013268.3	0.80628	0.0789084	0.100307	0.786667	0.431477	1	FALSE
AC013275.2	0.345779	-0.000105368	0.0747468	-0.00140967	0.998875	1	FALSE
AC013404.1	1.09242	-0.0808894	0.120443	-0.671601	0.501838	1	FALSE
AC013429.5	0.240869	-0.0216829	0.0747468	-0.290085	0.771751	1	FALSE
AC013436.6	0.307296	-0.0216829	0.0747468	-0.290085	0.771751	1	FALSE
AC013460.1	2.75465	0.0368442	0.169765	0.21703	0.828185	1	FALSE
AC013461.1	1649.91	-0.377736	0.274128	-1.37796	0.168217	1	FALSE
AC013470.6	3.57774	-0.138864	0.200612	-0.692201	0.488811	1	FALSE
AC013472.3	0.606065	0.0837832	0.0903663	0.927151	0.353848	1	FALSE
AC013474.4	0.510415	0.0594224	0.0764611	0.777158	0.437065	1	FALSE
AC013480.2	0.320724	0	0.0747468	0	1	1	FALSE
AC015849.12	0.207189	-0.0216829	0.0747468	-0.290085	0.771751	1	FALSE
AC015849.14	0.369759	-0.0432605	0.0747468	-0.57876	0.562751	1	FALSE
AC015849.16	16.9149	-0.129011	0.280441	-0.460029	0.645496	1	FALSE
AC015849.2	2.02685	0.027866	0.153418	0.181634	0.85587	1	FALSE
AC015922.7	0.320724	0	0.0747468	0	1	1	FALSE
AC015933.2	3.33988	-0.205521	0.198626	-1.03471	0.300805	1	FALSE
AC015971.2	0.357659	-0.000105368	0.0747468	-0.00140967	0.998875	1	FALSE
AC015977.5	0.595343	0.0139208	0.0892257	0.156018	0.876019	1	FALSE
AC016292.3	0.802636	0.00884311	0.109714	0.0806012	0.935759	1	FALSE
AC016549.1	0.500537	0	0.0754065	0	1	1	FALSE
AC016582.2	3.9466	0.0503978	0.199108	0.253118	0.800177	1	FALSE
AC016700.4	0.662569	-0.0603695	0.0852426	-0.708209	0.478816	1	FALSE
AC016700.5	23.507	0.0179406	0.291397	0.0615674	0.950907	1	FALSE
AC016700.6	2.12642	0.0797756	0.170601	0.467615	0.64006	1	FALSE
AC016712.2	16.7355	-0.266151	0.257666	-1.03293	0.301637	1	FALSE
AC016716.1	1.84115	0.066953	0.152173	0.439979	0.659952	1	FALSE
AC016722.3	0.198878	0.0430497	0.0747468	0.575941	0.564655	1	FALSE
AC016722.4	0.560792	0	0.075528	0	1	1	FALSE
AC016723.4	3.28453	-0.0590649	0.180734	-0.326805	0.743815	1	FALSE
AC016730.1	0.214163	-0.0432605	0.0747468	-0.57876	0.562751	1	FALSE
AC016734.2	1.61979	-0.0720802	0.145491	-0.495426	0.620299	1	FALSE
AC016735.1	3.12948	0.0399578	0.203073	0.196766	0.844011	1	FALSE
AC016738.4	0.301826	-0.0216829	0.0747468	-0.290085	0.771751	1	FALSE
AC016739.2	59.6328	0.172936	0.302739	0.571239	0.567838	1	FALSE
AC016747.3	315.801	0.150959	0.269339	0.56048	0.575152	1	FALSE
AC016757.3	10.5361	0.000397075	0.284296	0.0013967	0.998886	1	FALSE
AC016894.1	0.649325	0.0422584	0.0921712	0.458477	0.646609	1	FALSE
AC016907.3	1.14988	-0.0445151	0.122366	-0.363786	0.716018	1	FALSE
AC016910.1	0.250578	0.0214722	0.0747468	0.287265	0.773909	1	FALSE
AC016995.3	0.189273	0	0.0747468	0	1	1	FALSE
AC016999.2	0.194744	0	0.0747468	0	1	1	FALSE
AC017028.1	0.198878	0.0430497	0.0747468	0.575941	0.564655	1	FALSE
AC017048.1	0.831946	-0.0767036	0.109601	-0.699845	0.484024	1	FALSE
AC017060.1	0.448406	-0.0216829	0.0747468	-0.290085	0.771751	1	FALSE
AC017074.2	2.65748	-0.0304951	0.199398	-0.152935	0.878449	1	FALSE
AC017079.4	0.518021	0.00398186	0.0847227	0.0469987	0.962514	1	FALSE
AC017083.2	0.872113	-0.00147239	0.111284	-0.0132309	0.989444	1	FALSE
AC017104.6	4.2518	0.182032	0.215728	0.8438	0.398781	1	FALSE
AC018359.1	0.260469	0	0.0747468	0	1	1	FALSE
AC018442.1	0.306628	-0.000105368	0.0747468	-0.00140967	0.998875	1	FALSE
AC018462.2	29.3712	0.343494	0.306768	1.11972	0.262833	1	FALSE
AC018463.5	0.547845	-0.00450249	0.0776984	-0.0579483	0.95379	1	FALSE
AC018641.7	5.46733	0.0118457	0.216792	0.0546408	0.956425	1	FALSE
AC018737.3	0.194744	0	0.0747468	0	1	1	FALSE
AC018755.16	11.8501	0.36557	0.232209	1.57431	0.115416	1	FALSE
AC018755.17	0.457421	-0.0226947	0.0817417	-0.277639	0.78129	1	FALSE
AC018766.6	3.20704	0.0411597	0.158625	0.259478	0.795267	1	FALSE
AC018799.1	0.834683	0.00865452	0.108347	0.0798774	0.936335	1	FALSE
AC018816.3	1.46851	0.0617554	0.160494	0.384783	0.700398	1	FALSE
AC018865.5	0.403436	-0.0392934	0.075108	-0.523159	0.600864	1	FALSE
AC018890.6	0.356156	0.0214722	0.0747468	0.287265	0.773909	1	FALSE
AC019050.1	2.02954	-0.192703	0.161424	-1.19377	0.232569	1	FALSE
AC019097.7	0.829558	0.0425101	0.108307	0.392496	0.694692	1	FALSE
AC019109.1	0.254999	0	0.0747468	0	1	1	FALSE
AC019118.3	0.189273	0	0.0747468	0	1	1	FALSE
AC019129.1	1.48639	-0.00874422	0.149704	-0.0584101	0.953422	1	FALSE
AC019172.2	0.24634	-0.0216829	0.0747468	-0.290085	0.771751	1	FALSE
AC019181.3	0.800464	0.0605941	0.109474	0.553501	0.57992	1	FALSE
AC019186.1	0.476665	0.0214722	0.0747468	0.287265	0.773909	1	FALSE
AC020550.7	0.662784	0.0285407	0.092921	0.30715	0.758729	1	FALSE
AC020594.5	0.445322	0.0222903	0.0751147	0.296751	0.766657	1	FALSE
AC020951.1	0.263023	-0.000105368	0.0747468	-0.00140967	0.998875	1	FALSE
AC020983.5	0.711298	0.0509337	0.0950017	0.536135	0.591865	1	FALSE
AC021016.7	1.04155	0.0439764	0.127207	0.345707	0.729563	1	FALSE
AC021188.4	0.263023	-0.000105368	0.0747468	-0.00140967	0.998875	1	FALSE
AC022007.5	10.2041	0.0413164	0.271956	0.151923	0.879248	1	FALSE
AC022153.1	0.262677	-0.0216829	0.0747468	-0.290085	0.771751	1	FALSE
AC022154.7	2.50973	0.0639231	0.182535	0.350197	0.726191	1	FALSE
AC022182.1	2.82696	0.0512726	0.19137	0.267924	0.788758	1	FALSE
AC022182.2	10.3775	0.148569	0.280827	0.529041	0.596777	1	FALSE
AC022201.5	3.75949	0.269821	0.219423	1.22969	0.218815	1	FALSE
AC022210.2	3.13414	0.167309	0.201065	0.832117	0.405343	1	FALSE
AC022819.3	0.913259	0.0960837	0.104061	0.923338	0.355831	1	FALSE
AC023115.2	0.556537	0.0496342	0.0880962	0.56341	0.573156	1	FALSE
AC024082.4	0.250578	0.0214722	0.0747468	0.287265	0.773909	1	FALSE
AC024560.2	0.345215	0.0214722	0.0747468	0.287265	0.773909	1	FALSE
AC024560.3	284.662	0.0570479	0.305115	0.186972	0.851683	1	FALSE
AC024592.9	1.71299	-0.0838205	0.161672	-0.518461	0.604137	1	FALSE
AC024704.2	0.600213	0.0250275	0.0801928	0.312091	0.754971	1	FALSE
AC024937.6	0.189273	0	0.0747468	0	1	1	FALSE
AC025165.8	0.255703	0	0.0747468	0	1	1	FALSE
AC025171.1	10.9784	0.0596701	0.273138	0.218461	0.82707	1	FALSE
AC025335.1	82.6525	-0.149742	0.290344	-0.515741	0.606035	1	FALSE
AC025442.3	0.355142	0.0214722	0.0747468	0.287265	0.773909	1	FALSE
AC025750.5	0.467133	0.0214722	0.0747468	0.287265	0.773909	1	FALSE
AC025918.2	0.355106	0	0.0747468	0	1	1	FALSE
AC026202.3	1.42991	0.0644232	0.135109	0.476823	0.633488	1	FALSE
AC026271.5	80.9376	-0.173848	0.307276	-0.565773	0.571548	1	FALSE
AC026471.6	0.415396	0.0214722	0.0747468	0.287265	0.773909	1	FALSE
AC026954.6	0.548166	-0.0504333	0.0869729	-0.579873	0.562	1	FALSE
AC027119.1	0.267443	-0.0216829	0.0747468	-0.290085	0.771751	1	FALSE
AC027601.1	0.990133	0	0.0880436	0	1	1	FALSE
AC027612.1	1.29231	-0.0311457	0.147167	-0.211635	0.832392	1	FALSE
AC034187.2	0.512097	0.0440131	0.0752848	0.584621	0.558802	1	FALSE
AC034220.3	8.90836	-0.10417	0.255848	-0.407155	0.683894	1	FALSE
AC034243.1	9.75355	-0.238009	0.279793	-0.850661	0.394958	1	FALSE
AC046143.3	10.0896	0.124606	0.26795	0.465036	0.641906	1	FALSE
AC053503.4	1.66651	0.0873512	0.161875	0.539621	0.589458	1	FALSE
AC055764.1	0.240869	-0.0216829	0.0747468	-0.290085	0.771751	1	FALSE
AC055866.1	0.194744	0	0.0747468	0	1	1	FALSE
AC060834.2	7.29536	-0.0287312	0.263823	-0.108903	0.913279	1	FALSE
AC060834.3	17.0075	-0.0311697	0.300907	-0.103586	0.917498	1	FALSE
AC061961.2	1.039	0.0378153	0.128982	0.293183	0.769382	1	FALSE
AC061992.2	4.22267	0.0907835	0.216195	0.419915	0.674548	1	FALSE
AC062017.1	3.26519	0.0669338	0.192903	0.346982	0.728605	1	FALSE
AC062028.1	1.65459	0.0173646	0.158764	0.109374	0.912906	1	FALSE
AC062029.1	23.9464	-0.094623	0.306958	-0.30826	0.757884	1	FALSE
AC064836.3	0.824792	0.0370549	0.100152	0.369986	0.711393	1	FALSE
AC064850.4	3.70659	0.111395	0.200195	0.556433	0.577915	1	FALSE
AC064852.4	0.311882	0.0430497	0.0747468	0.575941	0.564655	1	FALSE
AC067945.3	12.1381	-0.0205811	0.291384	-0.0706324	0.94369	1	FALSE
AC067945.4	0.316303	0.0214722	0.0747468	0.287265	0.773909	1	FALSE
AC067959.1	0.91996	-0.0248868	0.102031	-0.243914	0.807297	1	FALSE
AC068042.1	0.194076	0.0214722	0.0747468	0.287265	0.773909	1	FALSE
AC068134.10	2.88517	-0.0601442	0.18761	-0.320581	0.748528	1	FALSE
AC068137.13	0.369759	-0.0432605	0.0747468	-0.57876	0.562751	1	FALSE
AC068282.3	19.7889	-0.00909747	0.300596	-0.0302647	0.975856	1	FALSE
AC068490.1	98.6446	0.082148	0.307491	0.267155	0.78935	1	FALSE
AC068490.2	268.806	0.132493	0.296113	0.447441	0.654557	1	FALSE
AC068491.3	0.931182	-0.0366291	0.0963794	-0.380051	0.703907	1	FALSE
AC068492.1	0.564503	-0.0447116	0.0876277	-0.510245	0.60988	1	FALSE
AC068499.10	4.37005	-0.0120277	0.221887	-0.0542062	0.956771	1	FALSE
AC068538.2	0.51291	-0.0191576	0.0765778	-0.250172	0.802454	1	FALSE
AC068580.5	2.41926	0.0814319	0.187796	0.433619	0.664565	1	FALSE
AC068580.6	2.25352	0.112665	0.132154	0.852532	0.393919	1	FALSE
AC068831.10	9.06996	-0.0767879	0.273363	-0.280901	0.778787	1	FALSE
AC068831.15	0.189273	0	0.0747468	0	1	1	FALSE
AC068831.16	3.24416	0.0211022	0.194702	0.108382	0.913693	1	FALSE
AC068831.3	1.26963	0.00783245	0.145552	0.0538119	0.957085	1	FALSE
AC068831.6	2.8564	-0.00652901	0.167626	-0.03895	0.96893	1	FALSE
AC068858.1	0.20652	-0.000105368	0.0747468	-0.00140967	0.998875	1	FALSE
AC069154.4	0.410594	0	0.0747468	0	1	1	FALSE
AC069155.1	6.60674	-0.201541	0.239092	-0.842943	0.39926	1	FALSE
AC069257.6	1.11775	-0.0307803	0.118984	-0.258693	0.795872	1	FALSE
AC069277.2	7.99671	0.105418	0.257241	0.409805	0.681949	1	FALSE
AC069368.3	2.39247	0.00898919	0.157354	0.0571273	0.954444	1	FALSE
AC069513.4	1.0645	0.0588526	0.108306	0.543393	0.586859	1	FALSE
AC072052.7	7.05132	-0.0670787	0.249983	-0.268333	0.788443	1	FALSE
AC072062.1	4.88691	-0.163831	0.240544	-0.681086	0.495817	1	FALSE
AC072062.3	0.669379	-0.0632523	0.101467	-0.623376	0.533037	1	FALSE
AC073043.1	3.06155	0.0229325	0.201495	0.113812	0.909387	1	FALSE
AC073046.25	28.0139	-0.0869554	0.291231	-0.298579	0.765261	1	FALSE
AC073052.1	2.4071	0.000103721	0.190838	0.000543504	0.999566	1	FALSE
AC073063.10	6.74949	-0.239456	0.255712	-0.936429	0.349052	1	FALSE
AC073069.2	0.397755	0.0752757	0.0750768	1.00265	0.31603	1	FALSE
AC073071.1	24.8666	0.44085	0.290257	1.51883	0.128805	1	FALSE
AC073072.5	1.17569	0.00722086	0.131713	0.0548226	0.95628	1	FALSE
AC073072.7	1.27566	-0.037132	0.13821	-0.268663	0.788189	1	FALSE
AC073109.2	0.36208	-0.0216829	0.0747468	-0.290085	0.771751	1	FALSE
AC073130.1	0.250578	0.0214722	0.0747468	0.287265	0.773909	1	FALSE
AC073133.1	3.3532	-0.0201519	0.196256	-0.102682	0.918215	1	FALSE
AC073133.2	0.92237	-0.057879	0.11634	-0.497497	0.618839	1	FALSE
AC073150.6	0.263023	-0.000105368	0.0747468	-0.00140967	0.998875	1	FALSE
AC073257.2	0.200215	0	0.0747468	0	1	1	FALSE
AC073283.4	88.1794	-0.0302836	0.299211	-0.101212	0.919383	1	FALSE
AC073283.7	0.811369	0.0310471	0.10141	0.306155	0.759487	1	FALSE
AC073316.1	0.714346	0.0430754	0.0959431	0.448968	0.653455	1	FALSE
AC073321.4	1.35016	0.0532237	0.133067	0.399977	0.689174	1	FALSE
AC073326.3	0.82427	-0.0595975	0.108249	-0.550561	0.581935	1	FALSE
AC073333.8	0.791665	-0.0122822	0.0890325	-0.137952	0.890279	1	FALSE
AC073342.12	2.30277	-0.0204608	0.177023	-0.115583	0.907983	1	FALSE
AC073343.13	13.0937	0.118582	0.285181	0.415814	0.677546	1	FALSE
AC073387.2	0.399093	0.0382309	0.0750875	0.509151	0.610646	1	FALSE
AC073410.1	7.24377	0.324782	0.247218	1.31375	0.188931	1	FALSE
AC073415.2	5.63314	-0.0673463	0.24367	-0.276383	0.782254	1	FALSE
AC073465.1	0.260469	0	0.0747468	0	1	1	FALSE
AC073465.3	0.710067	-0.0623135	0.105102	-0.592887	0.553257	1	FALSE
AC073551.1	0.360577	0	0.0747468	0	1	1	FALSE
AC073842.19	0.518403	0.0442515	0.0769774	0.574864	0.565384	1	FALSE
AC073869.2	0.776806	-0.0513858	0.108203	-0.474899	0.634859	1	FALSE
AC073900.4	0.374525	-0.0432605	0.0747468	-0.57876	0.562751	1	FALSE
AC074019.2	0.698291	-0.0626302	0.104341	-0.600246	0.548342	1	FALSE
AC074117.10	148.067	-0.110333	0.271577	-0.406267	0.684546	1	FALSE
AC074117.13	1.07691	-0.0780826	0.119963	-0.650886	0.51512	1	FALSE
AC074141.3	81.0243	0.755999	0.305038	2.47837	0.0131982	1	FALSE
AC074212.5	48.7572	0.38043	0.307121	1.2387	0.215458	1	FALSE
AC074212.6	7.96068	0.0492189	0.261632	0.188123	0.85078	1	FALSE
AC074286.1	40.0505	0.00596698	0.307905	0.0193793	0.984539	1	FALSE
AC074289.1	43.7994	-0.00805251	0.305798	-0.0263327	0.978992	1	FALSE
AC074366.3	1.22854	0.0726075	0.129006	0.562822	0.573556	1	FALSE
AC074367.1	0.449743	0	0.0750877	0	1	1	FALSE
AC074391.1	2.99561	-0.045465	0.181808	-0.250072	0.802532	1	FALSE
AC078852.1	2.95796	-0.00117323	0.190139	-0.0061704	0.995077	1	FALSE
AC078852.2	0.568636	-0.00158796	0.0788447	-0.0201403	0.983931	1	FALSE
AC078883.3	12.0627	-0.523414	0.284758	-1.8381	0.0660474	1	FALSE
AC078883.4	0.446555	-0.0211393	0.0751418	-0.281325	0.778461	1	FALSE
AC078899.1	19.8884	-0.0692572	0.25733	-0.269137	0.787824	1	FALSE
AC078899.3	7.48312	-0.209917	0.252527	-0.831265	0.405824	1	FALSE
AC078899.4	0.194076	0.0214722	0.0747468	0.287265	0.773909	1	FALSE
AC078941.1	45.7843	0.148919	0.307584	0.484156	0.628275	1	FALSE
AC079145.4	2.59627	0.136461	0.169911	0.803131	0.421899	1	FALSE
AC079150.2	7.44306	0.394802	0.227891	1.73242	0.0831996	1	FALSE
AC079150.3	0.460016	0.0191845	0.0751442	0.255303	0.798489	1	FALSE
AC079199.2	0.250232	0	0.0747468	0	1	1	FALSE
AC079248.1	0.3088	-0.0432605	0.0747468	-0.57876	0.562751	1	FALSE
AC079250.1	3.63261	-0.0114034	0.201362	-0.0566316	0.954839	1	FALSE
AC079305.10	4.36977	-0.00953076	0.186008	-0.0512384	0.959136	1	FALSE
AC079354.3	2.66971	0.00465413	0.186698	0.0249287	0.980112	1	FALSE
AC079354.5	1.27765	0.0154366	0.136502	0.113087	0.909961	1	FALSE
AC079586.1	0.982171	0.0804399	0.118747	0.677406	0.498148	1	FALSE
AC079610.2	0.510379	0.05085	0.0845246	0.6016	0.54744	1	FALSE
AC079630.4	0.457098	0.0246737	0.0817834	0.301695	0.762884	1	FALSE
AC079741.2	0.250578	0.0214722	0.0747468	0.287265	0.773909	1	FALSE
AC079742.4	0.840177	0.0121954	0.100938	0.12082	0.903833	1	FALSE
AC079776.1	1.88008	-0.147663	0.154755	-0.954172	0.339997	1	FALSE
AC079776.2	1.08974	0.0342588	0.109958	0.311562	0.755373	1	FALSE
AC079776.4	2.15246	-0.108948	0.166442	-0.654574	0.512742	1	FALSE
AC079779.4	0.253314	-0.0432605	0.0747468	-0.57876	0.562751	1	FALSE
AC079779.5	0.207189	-0.0216829	0.0747468	-0.290085	0.771751	1	FALSE
AC079780.3	0.988235	-0.137266	0.101379	-1.35399	0.175738	1	FALSE
AC079781.8	0.360577	0	0.0747468	0	1	1	FALSE
AC079807.1	0.262677	-0.0216829	0.0747468	-0.290085	0.771751	1	FALSE
AC079807.2	8.92047	0.0639486	0.268965	0.237758	0.812069	1	FALSE
AC079807.4	1.47582	0.156794	0.141858	1.10529	0.269033	1	FALSE
AC079834.1	0.366882	-0.000105368	0.0747468	-0.00140967	0.998875	1	FALSE
AC079896.1	34.6735	0.0881507	0.306835	0.28729	0.77389	1	FALSE
AC079922.2	1.91326	-0.120576	0.158256	-0.761901	0.446119	1	FALSE
AC079922.3	28.7021	0.4725	0.307777	1.5352	0.124735	1	FALSE
AC080094.1	0.553984	0.043795	0.0871726	0.502394	0.61539	1	FALSE
AC080125.1	0.357314	-0.0216829	0.0747468	-0.290085	0.771751	1	FALSE
AC083843.1	141.198	0.80657	0.306689	2.62993	0.00854033	1	FALSE
AC083843.2	0.723657	0.00999559	0.0865215	0.115527	0.908027	1	FALSE
AC083843.4	2.93955	0.145954	0.173321	0.842104	0.39973	1	FALSE
AC083873.4	8.57574	-0.261713	0.232968	-1.12339	0.261273	1	FALSE
AC083884.8	1.74461	0.0478723	0.118133	0.405241	0.6853	1	FALSE
AC083899.1	0.302174	-0.000105368	0.0747468	-0.00140967	0.998875	1	FALSE
AC083899.3	31.4056	-0.0814004	0.307512	-0.264707	0.791235	1	FALSE
AC083900.1	0.710975	0.0856897	0.0878184	0.97576	0.329184	1	FALSE
AC083949.1	0.40891	-0.0432605	0.0747468	-0.57876	0.562751	1	FALSE
AC084082.3	0.435613	-0.02114	0.0751158	-0.281431	0.77838	1	FALSE
AC084117.3	1.57472	-0.00743049	0.154067	-0.0482288	0.961534	1	FALSE
AC084149.2	1.03153	-0.021234	0.107027	-0.198399	0.842733	1	FALSE
AC084219.4	172.598	-0.405418	0.288477	-1.40537	0.15991	1	FALSE
AC084809.2	10.1255	-0.0526044	0.276443	-0.19029	0.849082	1	FALSE
AC084809.3	5.17172	-0.272607	0.235545	-1.15735	0.24713	1	FALSE
AC087073.1	80.3296	-0.170264	0.3079	-0.552986	0.580273	1	FALSE
AC087163.2	0.868221	-0.0397261	0.12041	-0.329924	0.741457	1	FALSE
AC087163.3	1.21149	0.0152159	0.10385	0.146518	0.883512	1	FALSE
AC087294.2	3.39036	0.145771	0.211714	0.688528	0.49112	1	FALSE
AC087350.1	0.496918	0.000680011	0.0836518	0.00812907	0.993514	1	FALSE
AC087491.2	0.25538	0.0430497	0.0747468	0.575941	0.564655	1	FALSE
AC087499.10	0.715504	-0.0815569	0.0956442	-0.852711	0.393819	1	FALSE
AC087499.4	0.256049	0.0214722	0.0747468	0.287265	0.773909	1	FALSE
AC087499.5	0.340308	-0.000105368	0.0747468	-0.00140967	0.998875	1	FALSE
AC087650.1	1.88591	3.91507e-05	0.173754	0.000225322	0.99982	1	FALSE
AC090286.2	0.75882	-0.00982076	0.0986184	-0.0995834	0.920675	1	FALSE
AC090453.1	0.201718	-0.0216829	0.0747468	-0.290085	0.771751	1	FALSE
AC090498.1	6.13929	-0.0152012	0.251539	-0.0604329	0.951811	1	FALSE
AC090505.5	1.80481	0.174509	0.157683	1.10671	0.268421	1	FALSE
AC090505.6	0.661068	0.0133852	0.092127	0.14529	0.884482	1	FALSE
AC090587.4	8.67363	0.0386649	0.264142	0.146379	0.883622	1	FALSE
AC090587.5	0.765068	0.042624	0.0980795	0.434586	0.663863	1	FALSE
AC090616.2	14.508	0.269259	0.281412	0.956815	0.338661	1	FALSE
AC090804.1	1.6484	-0.053781	0.148278	-0.362703	0.716827	1	FALSE
AC091133.1	7.65102	0.0103271	0.266798	0.0387076	0.969124	1	FALSE
AC091492.2	0.387102	-0.0432605	0.0747468	-0.57876	0.562751	1	FALSE
AC091633.2	3.77267	0.197408	0.210732	0.936773	0.348876	1	FALSE
AC091633.3	3.00824	-0.126481	0.202009	-0.626114	0.53124	1	FALSE
AC091654.7	48.9326	-0.044604	0.148644	-0.300072	0.764122	1	FALSE
AC091729.7	4.97482	0.0423573	0.24001	0.176481	0.859916	1	FALSE
AC091729.9	150.829	-0.032382	0.306712	-0.105578	0.915917	1	FALSE
AC091878.1	11.2926	0.0547401	0.266406	0.205476	0.8372	1	FALSE
AC091962.3	1.208	0.0313514	0.133407	0.235005	0.814205	1	FALSE
AC092066.1	70.7222	0.0971984	0.307455	0.316139	0.751897	1	FALSE
AC092106.1	0.921112	-0.0638394	0.105455	-0.605372	0.544932	1	FALSE
AC092155.1	0.44911	0.0376263	0.0751404	0.500747	0.616549	1	FALSE
AC092159.2	5.29278	-0.0305822	0.236883	-0.129103	0.897277	1	FALSE
AC092162.1	1.68442	-0.112657	0.139075	-0.810044	0.417915	1	FALSE
AC092171.2	5.36403	0.0296985	0.242084	0.122679	0.902361	1	FALSE
AC092171.4	0.350685	0.0214722	0.0747468	0.287265	0.773909	1	FALSE
AC092198.1	7.49535	0.290425	0.25426	1.14223	0.253356	1	FALSE
AC092295.4	0.544415	0.0227973	0.0873377	0.261024	0.794074	1	FALSE
AC092316.1	0.39429	0.0196618	0.0750614	0.261943	0.793365	1	FALSE
AC092535.3	0.994217	0.117198	0.110575	1.05989	0.289195	1	FALSE
AC092569.2	7.25091	-0.0385727	0.243237	-0.158581	0.873999	1	FALSE
AC092570.3	0.315958	0	0.0747468	0	1	1	FALSE
AC092573.2	3.02668	-0.233594	0.206168	-1.13303	0.257204	1	FALSE
AC092610.12	1.53192	-0.0940374	0.149234	-0.630136	0.528606	1	FALSE
AC092614.2	22.9716	-0.0735716	0.302063	-0.243564	0.807569	1	FALSE
AC092620.2	0.797516	0.0631916	0.0805169	0.784824	0.432557	1	FALSE
AC092620.3	0.773783	0.0924363	0.0914215	1.0111	0.311968	1	FALSE
AC092625.1	0.751845	0.0111161	0.0974301	0.114093	0.909164	1	FALSE
AC092641.2	0.194744	0	0.0747468	0	1	1	FALSE
AC092642.1	2.19964	-0.112674	0.183743	-0.613216	0.539733	1	FALSE
AC092646.1	0.255703	0	0.0747468	0	1	1	FALSE
AC092646.2	0.615611	0.0230824	0.090761	0.25432	0.799248	1	FALSE
AC092664.1	0.821915	-0.0852547	0.110832	-0.769226	0.441759	1	FALSE
AC092669.6	1.67036	0.0686945	0.155253	0.442467	0.658151	1	FALSE
AC092687.5	0.403436	-0.0392934	0.075108	-0.523159	0.600864	1	FALSE
AC092755.4	0.415361	0	0.0747468	0	1	1	FALSE
AC092798.2	0.600572	0	0.0820242	0	1	1	FALSE
AC092835.2	56.1422	-0.177026	0.291234	-0.60785	0.543287	1	FALSE
AC093106.6	0.401231	-0.0216829	0.0747468	-0.290085	0.771751	1	FALSE
AC093107.7	0.737787	-0.0259976	0.0956983	-0.271662	0.785882	1	FALSE
AC093110.3	0.460684	0	0.075101	0	1	1	FALSE
AC093142.2	1.19878	0.0787517	0.113438	0.694228	0.487539	1	FALSE
AC093159.1	3.46827	0.0313194	0.204803	0.152925	0.878458	1	FALSE
AC093162.5	0.61904	0.0453228	0.0757705	0.598159	0.549734	1	FALSE
AC093323.3	334.333	0.383669	0.255632	1.50086	0.133391	1	FALSE
AC093375.1	44.4748	0.378726	0.292729	1.29378	0.195742	1	FALSE
AC093382.1	0.961875	-0.0804268	0.116937	-0.687777	0.491593	1	FALSE
AC093388.3	1.82988	0.0622905	0.138835	0.448666	0.653672	1	FALSE
AC093390.1	9.58924	0.0254968	0.268883	0.0948247	0.924454	1	FALSE
AC093495.4	1.51993	5.03468e-05	0.159282	0.000316086	0.999748	1	FALSE
AC093616.4	0.556156	-0.00062928	0.0870479	-0.00722912	0.994232	1	FALSE
AC093620.5	14.5788	-0.0588392	0.298412	-0.197174	0.843691	1	FALSE
AC093627.10	13.1876	-0.150798	0.279013	-0.540471	0.588873	1	FALSE
AC093627.12	0.199546	0.0214722	0.0747468	0.287265	0.773909	1	FALSE
AC093627.7	0.75458	0.0748094	0.0892585	0.838121	0.401963	1	FALSE
AC093627.9	33.3456	-0.0797053	0.307082	-0.259557	0.795206	1	FALSE
AC093642.1	1.91779	-0.0717412	0.167197	-0.429083	0.667863	1	FALSE
AC093642.3	7.0676	-0.153773	0.262979	-0.584734	0.558726	1	FALSE
AC093642.5	11.5176	0.131251	0.286641	0.457895	0.647028	1	FALSE
AC093673.5	286.511	0.0177455	0.259058	0.0685002	0.945387	1	FALSE
AC093698.1	1.04866	0.0257102	0.119581	0.215003	0.829765	1	FALSE
AC093724.2	15.8207	0.148366	0.265804	0.558179	0.576722	1	FALSE
AC093818.1	127.837	-0.142116	0.30789	-0.461581	0.644382	1	FALSE
AC093838.4	616.67	0.0101964	0.294448	0.0346289	0.972376	1	FALSE
AC093850.1	0.349635	0	0.0747468	0	1	1	FALSE
AC093899.3	0.307296	-0.0216829	0.0747468	-0.290085	0.771751	1	FALSE
AC093901.1	9.93839	-0.140859	0.274687	-0.512797	0.608093	1	FALSE
AC096574.4	2.81646	-0.0127899	0.196408	-0.0651188	0.948079	1	FALSE
AC096574.5	30.1122	0.660873	0.302479	2.18485	0.0288996	1	FALSE
AC096649.1	1.91299	0.0145154	0.138952	0.104463	0.916802	1	FALSE
AC096649.2	0.869066	0.00868773	0.111727	0.0777585	0.93802	1	FALSE
AC096664.1	1.75974	-0.0273749	0.1532	-0.178687	0.858183	1	FALSE
AC096664.2	0.469198	-0.0195465	0.0752526	-0.259745	0.79506	1	FALSE
AC096670.3	0.254999	0	0.0747468	0	1	1	FALSE
AC097374.2	0.306594	-0.0216829	0.0747468	-0.290085	0.771751	1	FALSE
AC097382.5	0.866535	0.0958343	0.11317	0.846819	0.397096	1	FALSE
AC097467.2	0.360577	0	0.0747468	0	1	1	FALSE
AC097468.4	31.9281	-0.282581	0.307403	-0.919252	0.357964	1	FALSE
AC097468.7	0.20652	-0.000105368	0.0747468	-0.00140967	0.998875	1	FALSE
AC097523.1	0.835028	-0.116713	0.10304	-1.13269	0.257345	1	FALSE
AC097533.1	0.25538	0.0430497	0.0747468	0.575941	0.564655	1	FALSE
AC097662.2	61.9623	-0.0789449	0.294277	-0.268267	0.788493	1	FALSE
AC097711.1	0.734576	0.00779321	0.0949178	0.0821048	0.934563	1	FALSE
AC097713.5	0.774106	0.0682691	0.1076	0.634469	0.525775	1	FALSE
AC097721.1	0.300322	0	0.0747468	0	1	1	FALSE
AC097721.2	4.63142	0.109503	0.224847	0.487012	0.62625	1	FALSE
AC097724.3	24.2797	-0.216725	0.304203	-0.712435	0.476196	1	FALSE
AC098614.1	0.255703	0	0.0747468	0	1	1	FALSE
AC098614.2	32.981	-0.0694869	0.307876	-0.225697	0.821437	1	FALSE
AC098617.1	0.383349	0.0200218	0.0749989	0.266961	0.789499	1	FALSE
AC098820.2	0.256049	0.0214722	0.0747468	0.287265	0.773909	1	FALSE
AC098820.3	5.10862	0.0367813	0.232329	0.158315	0.874208	1	FALSE
AC098820.4	0.35924	0.0430497	0.0747468	0.575941	0.564655	1	FALSE
AC098973.2	28.4481	0.0302006	0.307291	0.0982802	0.92171	1	FALSE
AC099535.4	1.31562	-0.0242635	0.13562	-0.178908	0.85801	1	FALSE
AC099668.5	0.311537	0.0214722	0.0747468	0.287265	0.773909	1	FALSE
AC099754.1	0.200215	0	0.0747468	0	1	1	FALSE
AC099850.1	8.69687	-0.279327	0.271099	-1.03035	0.302846	1	FALSE
AC100830.4	4.87493	0.159736	0.221611	0.720797	0.471035	1	FALSE
AC100830.5	0.401613	0.0214722	0.0747468	0.287265	0.773909	1	FALSE
AC104024.1	0.355811	0	0.0747468	0	1	1	FALSE
AC104058.1	0.201718	-0.0216829	0.0747468	-0.290085	0.771751	1	FALSE
AC104076.2	0.347951	-0.0432605	0.0747468	-0.57876	0.562751	1	FALSE
AC104076.3	0.690325	0.0431308	0.0951133	0.453468	0.650212	1	FALSE
AC104131.1	0.302174	-0.000105368	0.0747468	-0.00140967	0.998875	1	FALSE
AC104297.1	3.19451	-0.00545311	0.187494	-0.0290842	0.976797	1	FALSE
AC104304.4	46.9121	0.0328876	0.307591	0.10692	0.914852	1	FALSE
AC104306.1	0.511047	0.0281625	0.0845449	0.333107	0.739053	1	FALSE
AC104389.28	0.359908	0.0214722	0.0747468	0.287265	0.773909	1	FALSE
AC104389.32	0.255703	0	0.0747468	0	1	1	FALSE
AC104451.2	0.198878	0.0430497	0.0747468	0.575941	0.564655	1	FALSE
AC104532.3	0.200215	0	0.0747468	0	1	1	FALSE
AC104532.4	0.662751	0.00152196	0.0932452	0.0163221	0.986977	1	FALSE
AC104634.3	0.590541	-0.00728879	0.0896732	-0.0812817	0.935218	1	FALSE
AC104651.2	2.31513	-0.131357	0.165259	-0.794858	0.426696	1	FALSE
AC104653.1	0.784613	0.0183538	0.0986787	0.185996	0.852448	1	FALSE
AC104654.2	0.259801	0.0214722	0.0747468	0.287265	0.773909	1	FALSE
AC104655.3	12.1118	0.166869	0.271552	0.614499	0.538885	1	FALSE
AC104667.3	8.86643	0.146259	0.253311	0.577389	0.563677	1	FALSE
AC104809.4	0.374525	-0.0432605	0.0747468	-0.57876	0.562751	1	FALSE
AC104820.2	0.200215	0	0.0747468	0	1	1	FALSE
AC104843.3	0.451951	-0.0193206	0.0751329	-0.257153	0.797061	1	FALSE
AC105339.1	0.659562	0.0354084	0.0846678	0.418205	0.675798	1	FALSE
AC105342.1	3.32797	0.0547524	0.202958	0.269772	0.787336	1	FALSE
AC105399.2	1.25528	0.112384	0.127856	0.87899	0.379407	1	FALSE
AC105402.2	1.18287	0.0439788	0.103406	0.425303	0.670616	1	FALSE
AC105402.3	0.522823	0.026784	0.0852878	0.314043	0.753488	1	FALSE
AC105760.2	11.3394	0.125855	0.276452	0.455252	0.648928	1	FALSE
AC105760.3	0.194076	0.0214722	0.0747468	0.287265	0.773909	1	FALSE
AC106782.20	0.835029	0.0424863	0.108554	0.391384	0.695514	1	FALSE
AC106786.1	0.311537	0.0214722	0.0747468	0.287265	0.773909	1	FALSE
AC106875.1	4.81063	0.0271834	0.185879	0.146242	0.88373	1	FALSE
AC107081.5	0.399093	0.0382309	0.0750875	0.509151	0.610646	1	FALSE
AC107218.3	32.0726	-0.21877	0.307003	-0.712598	0.476094	1	FALSE
AC108004.3	0.298317	0.0643724	0.0747554	0.861107	0.389179	1	FALSE
AC108025.2	3.92596	0.0448415	0.205994	0.217683	0.827676	1	FALSE
AC108039.1	0.441084	-0.0211394	0.0751397	-0.281334	0.778454	1	FALSE
AC108039.3	0.467824	0.0647204	0.0747624	0.865682	0.386665	1	FALSE
AC108051.2	0.320724	0	0.0747468	0	1	1	FALSE
AC108051.3	0.589869	0.0157275	0.0800908	0.196371	0.84432	1	FALSE
AC108142.1	85.3766	-0.0879574	0.294793	-0.29837	0.765421	1	FALSE
AC108448.3	0.199546	0.0214722	0.0747468	0.287265	0.773909	1	FALSE
AC108463.2	1.3618	-0.0440489	0.141436	-0.31144	0.755466	1	FALSE
AC108479.2	0.661554	0.0846442	0.0933424	0.906814	0.364505	1	FALSE
AC108488.4	28.3494	-0.327203	0.30656	-1.06734	0.28582	1	FALSE
AC108925.1	0.254999	0	0.0747468	0	1	1	FALSE
AC109333.10	1.52133	-0.0431522	0.146742	-0.294069	0.768705	1	FALSE
AC109631.1	0.302174	-0.000105368	0.0747468	-0.00140967	0.998875	1	FALSE
AC109642.1	3.75686	0.083437	0.222801	0.374491	0.708039	1	FALSE
AC109815.2	1.61885	0.0813748	0.146908	0.553918	0.579635	1	FALSE
AC110299.5	0.41063	0.0214722	0.0747468	0.287265	0.773909	1	FALSE
AC110615.1	0.262677	-0.0216829	0.0747468	-0.290085	0.771751	1	FALSE
AC110781.3	0.855848	0.0311578	0.10052	0.309965	0.756587	1	FALSE
AC110926.4	0.703441	-0.00608697	0.094081	-0.0646992	0.948413	1	FALSE
AC111155.1	0.518403	0.0442515	0.0769774	0.574864	0.565384	1	FALSE
AC111200.7	0.267443	-0.0216829	0.0747468	-0.290085	0.771751	1	FALSE
AC112198.1	0.198878	0.0430497	0.0747468	0.575941	0.564655	1	FALSE
AC112229.1	0.92311	0.0280749	0.0938956	0.299002	0.764939	1	FALSE
AC112497.1	1.09918	0.0371349	0.0914759	0.405952	0.684778	1	FALSE
AC112715.2	0.508349	-0.0277231	0.0845319	-0.32796	0.742942	1	FALSE
AC113189.5	132.569	0.412983	0.28248	1.46199	0.143745	1	FALSE
AC113404.1	5.02292	-0.00417007	0.232274	-0.0179533	0.985676	1	FALSE
AC113607.2	0.240869	-0.0216829	0.0747468	-0.290085	0.771751	1	FALSE
AC114271.2	150.633	0.191333	0.305365	0.626572	0.53094	1	FALSE
AC114730.2	2.65661	-0.250063	0.192682	-1.2978	0.194355	1	FALSE
AC114730.3	9.17032	0.102108	0.239607	0.426146	0.670001	1	FALSE
AC114730.8	0.497863	0.0661748	0.0754806	0.876713	0.380643	1	FALSE
AC114755.3	0.20652	-0.000105368	0.0747468	-0.00140967	0.998875	1	FALSE
AC114755.7	0.296355	-0.0216829	0.0747468	-0.290085	0.771751	1	FALSE
AC114776.3	0.200215	0	0.0747468	0	1	1	FALSE
AC114803.3	26.1524	-0.210115	0.248255	-0.846369	0.397347	1	FALSE
AC114877.3	0.703786	0.0193184	0.085847	0.225032	0.821954	1	FALSE
AC115617.2	2.38075	0.0287693	0.184781	0.155694	0.876274	1	FALSE
AC116035.1	1.82582	0.0317946	0.164974	0.192725	0.847174	1	FALSE
AC116366.6	0.301828	-0.0216829	0.0747468	-0.290085	0.771751	1	FALSE
AC116609.2	11.5087	0.126994	0.272003	0.466883	0.640583	1	FALSE
AC116609.3	0.349635	0	0.0747468	0	1	1	FALSE
AC116614.1	11.726	0.0458178	0.287686	0.159263	0.873462	1	FALSE
AC117947.1	0.791665	-0.0122822	0.0890325	-0.137952	0.890279	1	FALSE
AC123023.1	3.24689	-0.124381	0.204016	-0.609663	0.542085	1	FALSE
AC123886.2	0.59797	0.0590876	0.0758327	0.779184	0.435871	1	FALSE
AC124789.1	17.9106	0.128259	0.285372	0.449445	0.653111	1	FALSE
AC124944.3	0.438698	-0.064838	0.0747468	-0.867435	0.385704	1	FALSE
AC124944.5	25.1713	0.211829	0.307627	0.68859	0.491081	1	FALSE
AC125232.1	50.6775	0.322854	0.30205	1.06888	0.285125	1	FALSE
AC125238.2	2.00126	-0.077268	0.160966	-0.480028	0.631207	1	FALSE
AC126544.4	3.42556	0.0579316	0.168513	0.343782	0.73101	1	FALSE
AC127904.2	5.27901	0.25991	0.226815	1.14591	0.251831	1	FALSE
AC129492.1	0.555357	0.0178996	0.0782023	0.228888	0.818956	1	FALSE
AC129492.6	31.4376	0.10979	0.307558	0.356974	0.721111	1	FALSE
AC131056.3	0.355487	0.0430497	0.0747468	0.575941	0.564655	1	FALSE
AC131097.4	1.38488	0.0374423	0.139401	0.268594	0.788242	1	FALSE
AC132008.1	1.03405	-0.0473072	0.118561	-0.399013	0.689884	1	FALSE
AC133644.3	0.240869	-0.0216829	0.0747468	-0.290085	0.771751	1	FALSE
AC133680.1	0.408907	-0.0389302	0.075138	-0.518117	0.604377	1	FALSE
AC133785.1	1.4303	0.0627823	0.131931	0.475871	0.634166	1	FALSE
AC136289.1	1.2181	0.0357982	0.135886	0.263443	0.792209	1	FALSE
AC136352.3	25.1938	-0.381334	0.296229	-1.2873	0.197991	1	FALSE
AC137723.5	2.76363	-0.0888546	0.188266	-0.471962	0.636954	1	FALSE
AC137932.4	2.96164	0.0192569	0.195179	0.0986628	0.921406	1	FALSE
AC137932.5	1.13265	-0.0157176	0.120495	-0.130442	0.896217	1	FALSE
AC137932.6	1.37526	0.0138237	0.127813	0.108155	0.913872	1	FALSE
AC137934.1	1.2899	0.00155213	0.126413	0.0122782	0.990204	1	FALSE
AC138035.2	17.7929	-0.0403461	0.265464	-0.151984	0.8792	1	FALSE
AC138430.4	5.41346	-0.154528	0.239829	-0.644324	0.519365	1	FALSE
AC138517.4	1.05525	-0.0457072	0.119149	-0.383613	0.701266	1	FALSE
AC138517.6	0.305959	0.0214722	0.0747468	0.287265	0.773909	1	FALSE
AC138623.1	0.201718	-0.0216829	0.0747468	-0.290085	0.771751	1	FALSE
AC138969.4	2.46292	-0.110822	0.164164	-0.675069	0.499632	1	FALSE
AC139100.3	0.796226	-0.00848261	0.10789	-0.0786226	0.937333	1	FALSE
AC139100.4	18.0951	0.437597	0.271141	1.61391	0.106547	1	FALSE
AC139143.2	1.60524	0.0632401	0.148163	0.426829	0.669504	1	FALSE
AC139712.2	0.20652	-0.000105368	0.0747468	-0.00140967	0.998875	1	FALSE
AC139887.4	1.18084	0.0590248	0.125211	0.471401	0.637354	1	FALSE
AC140076.1	0.663237	-0.0231559	0.0925986	-0.250067	0.802535	1	FALSE
AC140481.8	0.70449	0.0951915	0.096371	0.987761	0.32327	1	FALSE
AC140542.2	42.5669	0.175078	0.307877	0.568662	0.569586	1	FALSE
AC141586.5	62.7835	0.350439	0.294537	1.18979	0.234128	1	FALSE
AC141928.1	198.864	0.102392	0.266624	0.384033	0.700954	1	FALSE
AC141930.2	1.0284	0.0625466	0.117254	0.533429	0.593737	1	FALSE
AC142119.1	6.85263	-0.275226	0.249729	-1.1021	0.270419	1	FALSE
AC142472.6	46.9789	0.0247821	0.303813	0.0815703	0.934988	1	FALSE
AC142528.1	2.88594	0.0141489	0.178868	0.0791026	0.936951	1	FALSE
AC144449.1	5.41754	-0.0542879	0.237633	-0.228453	0.819294	1	FALSE
AC144450.1	0.622898	0.000656807	0.080797	0.0081291	0.993514	1	FALSE
AC144450.2	0.810032	0.0866715	0.111037	0.780563	0.43506	1	FALSE
AC144530.1	13.8865	0.444922	0.266103	1.67199	0.0945258	1	FALSE
AC144652.1	83.1534	-0.104195	0.292149	-0.356651	0.721353	1	FALSE
AC144831.1	1.47397	-0.0230222	0.143609	-0.160312	0.872635	1	FALSE
AC144831.3	0.255035	0.0214722	0.0747468	0.287265	0.773909	1	FALSE
AC145124.2	3.87239	0.162855	0.224999	0.723804	0.469186	1	FALSE
AC145343.2	0.959812	0.0502016	0.117555	0.427049	0.669343	1	FALSE
AC156455.1	12.0441	0.206583	0.281874	0.732891	0.463625	1	FALSE
AC159540.1	3.21498	0.193034	0.205182	0.940796	0.346809	1	FALSE
AC213203.1	0.712097	0.0335613	0.103975	0.322782	0.746861	1	FALSE
AC226118.1	7.15728	-0.22633	0.262328	-0.862772	0.388263	1	FALSE
AC226119.4	0.756409	0.0126805	0.0963096	0.131664	0.89525	1	FALSE
AC240274.1	101.06	-0.0750244	0.305316	-0.245727	0.805894	1	FALSE
AC241585.1	1.45901	0.0879279	0.135903	0.646988	0.51764	1	FALSE
AC245100.1	19.046	0.0352608	0.301804	0.116833	0.906992	1	FALSE
ACA64	1.09717	0.0715678	0.0911663	0.785024	0.432439	1	FALSE
ACAA1	800.602	0.520668	0.259413	2.0071	0.0447387	1	FALSE
ACAA2	2363.37	-0.0265571	0.226564	-0.117216	0.906689	1	FALSE
ACACA	3985.52	-0.17648	0.276885	-0.637378	0.523878	1	FALSE
ACACB	92.2832	-0.0406339	0.29283	-0.138763	0.889638	1	FALSE
ACAD10	455.798	0.00783224	0.279928	0.0279795	0.977679	1	FALSE
ACAD11	39.9141	0.177881	0.307028	0.579363	0.562344	1	FALSE
ACAD8	729.8	-0.153849	0.272662	-0.564247	0.572586	1	FALSE
ACAD9	967.877	0.0987996	0.231144	0.427438	0.66906	1	FALSE
ACADL	18.1434	0.270633	0.301912	0.896398	0.370041	1	FALSE
ACADM	2571.51	-0.266791	0.247838	-1.07647	0.281715	1	FALSE
ACADS	539.892	0.0410563	0.278791	0.147266	0.882922	1	FALSE
ACADSB	1138.95	-0.37589	0.275471	-1.36454	0.172398	1	FALSE
ACADVL	3855.77	-0.0571006	0.281649	-0.202737	0.839341	1	FALSE
ACAN	19.2016	-0.0589282	0.304108	-0.193774	0.846353	1	FALSE
ACAP1	69.3019	0.0737693	0.307908	0.239583	0.810654	1	FALSE
ACAP2	1881.91	-0.453741	0.266494	-1.70263	0.0886373	1	FALSE
ACAP2-IT1	2.588	0.110667	0.189051	0.585382	0.558291	1	FALSE
ACAP3	855.997	0.2186	0.298434	0.732493	0.463868	1	FALSE
ACAT1	732.483	0.252289	0.258121	0.977406	0.328368	1	FALSE
ACAT2	4322.57	-0.39418	0.260743	-1.51176	0.130596	1	FALSE
ACBD3	1463.5	-0.0951203	0.231406	-0.411054	0.681033	1	FALSE
ACBD4	116.515	0.351892	0.275802	1.27589	0.201996	1	FALSE
ACBD5	896.12	-0.414942	0.27788	-1.49324	0.135374	1	FALSE
ACBD6	1244.3	0.279892	0.230764	1.21289	0.22517	1	FALSE
ACBD7	24.6058	-0.205302	0.307484	-0.667684	0.504335	1	FALSE
ACCS	234.157	0.00839547	0.291231	0.0288275	0.977002	1	FALSE
ACD	786.445	0.339511	0.296141	1.14645	0.251609	1	FALSE
ACE	94.6304	0.227244	0.301492	0.753729	0.451012	1	FALSE
ACE2	21.4117	-0.118792	0.30148	-0.39403	0.693559	1	FALSE
ACER1	0.401264	-0.000691652	0.0782384	-0.00884031	0.992947	1	FALSE
ACER2	11.2942	-0.318264	0.27976	-1.13763	0.255273	1	FALSE
ACER3	719.721	-0.0777463	0.257865	-0.3015	0.763033	1	FALSE
ACHE	731.624	0.648259	0.307783	2.10622	0.0351852	1	FALSE
ACIN1	10608.8	0.185131	0.254914	0.726247	0.467687	1	FALSE
ACKR1	4.69902	-0.054125	0.235212	-0.230111	0.818005	1	FALSE
ACKR2	10.8197	0.0235056	0.266229	0.088291	0.929645	1	FALSE
ACKR3	7210.78	0.233373	0.236474	0.986884	0.323699	1	FALSE
ACLY	13808.1	-0.381726	0.260572	-1.46496	0.142932	1	FALSE
ACMSD	0.200215	0	0.0747468	0	1	1	FALSE
ACO1	2097.03	0.171415	0.258669	0.662683	0.507534	1	FALSE
ACO2	2795.82	0.236956	0.262907	0.901292	0.367433	1	FALSE
ACOT1	22.7576	-0.201192	0.305789	-0.657943	0.510574	1	FALSE
ACOT11	179.293	0.104001	0.294426	0.353231	0.723915	1	FALSE
ACOT12	8.32567	0.0609006	0.26419	0.230518	0.817689	1	FALSE
ACOT13	769.229	-0.0867318	0.262494	-0.330414	0.741087	1	FALSE
ACOT2	78.807	0.316424	0.306221	1.03332	0.301454	1	FALSE
ACOT4	32.0629	0.115666	0.307814	0.375766	0.707091	1	FALSE
ACOT6	0.344869	0	0.0747468	0	1	1	FALSE
ACOT7	1420.06	0.461491	0.301578	1.53025	0.125954	1	FALSE
ACOT8	826.228	0.563023	0.265148	2.12343	0.033718	1	FALSE
ACOT9	759.592	-0.0205267	0.249979	-0.0821137	0.934556	1	FALSE
ACOX1	2285.23	-0.0205739	0.231377	-0.0889192	0.929146	1	FALSE
ACOX2	98.5006	0.74889	0.290557	2.57742	0.00995396	1	FALSE
ACOX3	5951.55	0.0261834	0.243419	0.107565	0.914341	1	FALSE
ACOXL	613.99	0.221244	0.239957	0.922013	0.356522	1	FALSE
ACP1	2596.5	0.0323632	0.227104	0.142503	0.886682	1	FALSE
ACP2	1254.95	0.0421986	0.269238	0.156733	0.875455	1	FALSE
ACP5	152.565	0.23943	0.304392	0.786584	0.431526	1	FALSE
ACP6	263.92	0.269822	0.288043	0.936742	0.348891	1	FALSE
ACPP	327.37	0.29946	0.272493	1.09896	0.271783	1	FALSE
ACR	1.48951	0.0274216	0.129251	0.212157	0.831984	1	FALSE
ACRBP	21.4583	-0.115254	0.302061	-0.381557	0.70279	1	FALSE
ACRC	107.916	0.268408	0.287233	0.934461	0.350066	1	FALSE
ACSBG1	2.59888	-0.217645	0.195711	-1.11207	0.266107	1	FALSE
ACSF2	1003.01	0.0841969	0.263675	0.319321	0.749483	1	FALSE
ACSF3	552.724	0.291983	0.242603	1.20355	0.228765	1	FALSE
ACSL1	349.853	0.0940084	0.306172	0.307044	0.75881	1	FALSE
ACSL3	1629.66	-0.459198	0.247824	-1.85292	0.063894	1	FALSE
ACSL4	1096.47	-0.5537	0.271185	-2.04178	0.0411735	1	FALSE
ACSL6	1.18519	-0.0367391	0.124442	-0.295231	0.767817	1	FALSE
ACSM1	0.25538	0.0430497	0.0747468	0.575941	0.564655	1	FALSE
ACSM3	7.4267	0.268997	0.260557	1.03239	0.301889	1	FALSE
ACSM4	136.784	0.318931	0.290629	1.09738	0.272475	1	FALSE
ACSM6	0.91505	-0.0757387	0.12235	-0.619031	0.535896	1	FALSE
ACSS1	1.63163	0.0923706	0.147201	0.627515	0.530322	1	FALSE
ACSS2	914.783	-0.259996	0.253155	-1.02702	0.30441	1	FALSE
ACSS3	2081.34	-0.273035	0.238002	-1.1472	0.2513	1	FALSE
ACTA1	104.394	0.31293	0.307665	1.01711	0.3091	1	FALSE
ACTA2	7.71015	0.296417	0.243063	1.21951	0.222652	1	FALSE
ACTA2-AS1	0.355106	0	0.0747468	0	1	1	FALSE
ACTB	104486	0.213204	0.302856	0.703976	0.481448	1	FALSE
ACTBP1	1.76756	-0.161384	0.156164	-1.03343	0.301404	1	FALSE
ACTBP11	9.14376	-0.13124	0.273971	-0.479028	0.631919	1	FALSE
ACTBP12	0.355106	0	0.0747468	0	1	1	FALSE
ACTBP14	0.5475	-0.0271514	0.0774164	-0.350719	0.725799	1	FALSE
ACTBP2	19.4588	-0.00905818	0.301034	-0.0300902	0.975995	1	FALSE
ACTBP7	2.91008	0.0512158	0.199959	0.256131	0.79785	1	FALSE
ACTBP8	3.50786	0.213823	0.217491	0.983135	0.325541	1	FALSE
ACTBP9	7.78363	-0.252993	0.255848	-0.988842	0.32274	1	FALSE
ACTC1	541.259	0.127227	0.303456	0.419261	0.675025	1	FALSE
ACTG1	181603	0.0559932	0.28845	0.194117	0.846084	1	FALSE
ACTG1P1	18.0526	-0.302249	0.301539	-1.00235	0.316174	1	FALSE
ACTG1P10	1.32385	0.0568548	0.140595	0.404386	0.685929	1	FALSE
ACTG1P12	2.44944	-0.0517206	0.184345	-0.280564	0.779045	1	FALSE
ACTG1P14	17.6866	0.188353	0.281853	0.668268	0.503963	1	FALSE
ACTG1P15	1.21744	0.0621432	0.13705	0.453433	0.650237	1	FALSE
ACTG1P16	1.70019	-0.0237343	0.151215	-0.156957	0.875279	1	FALSE
ACTG1P17	9.40057	0.023735	0.270848	0.0876322	0.930169	1	FALSE
ACTG1P18	0.262677	-0.0216829	0.0747468	-0.290085	0.771751	1	FALSE
ACTG1P19	1.03829	0.0242485	0.116005	0.209029	0.834426	1	FALSE
ACTG1P20	12.5641	-0.371007	0.288117	-1.28769	0.197852	1	FALSE
ACTG1P21	1.12409	-0.0906573	0.13393	-0.676901	0.498468	1	FALSE
ACTG1P23	2.37806	0.0743851	0.160779	0.462653	0.643613	1	FALSE
ACTG1P24	5.38397	-0.0394187	0.243365	-0.161974	0.871326	1	FALSE
ACTG1P3	2.57041	0.152156	0.180725	0.841917	0.399834	1	FALSE
ACTG1P9	3.33123	-0.157769	0.199175	-0.792111	0.428296	1	FALSE
ACTG2	17.0713	0.0744042	0.280125	0.265611	0.790539	1	FALSE
ACTL10	23.4636	0.208	0.300892	0.691278	0.489391	1	FALSE
ACTL6A	1872.73	-0.0140225	0.233631	-0.06002	0.95214	1	FALSE
ACTL6B	0.908778	-0.0327417	0.112764	-0.290357	0.771543	1	FALSE
ACTL7B	0.256049	0.0214722	0.0747468	0.287265	0.773909	1	FALSE
ACTL8	0.96749	0.0224599	0.116342	0.193051	0.846919	1	FALSE
ACTN1	11511.7	0.225409	0.266579	0.845562	0.397797	1	FALSE
ACTN1-AS1	3.32209	0.00114965	0.19492	0.00589808	0.995294	1	FALSE
ACTN2	19.3475	0.0944745	0.295786	0.319402	0.749422	1	FALSE
ACTN3	589.583	0.870423	0.288542	3.01663	0.00255602	1	FALSE
ACTN4	7646.28	0.410407	0.268024	1.53123	0.125712	1	FALSE
ACTN4P1	0.809506	-0.0353157	0.11014	-0.320644	0.74848	1	FALSE
ACTP1	0.253314	-0.0432605	0.0747468	-0.57876	0.562751	1	FALSE
ACTR10	1396.06	-0.0856717	0.255753	-0.334978	0.737641	1	FALSE
ACTR1A	3931.7	0.0312308	0.244208	0.127886	0.898239	1	FALSE
ACTR1B	2243.04	-0.112478	0.219719	-0.511916	0.60871	1	FALSE
ACTR2	8416.9	-0.459118	0.271026	-1.694	0.0902654	1	FALSE
ACTR3	5993.19	-0.0154074	0.221579	-0.0695345	0.944564	1	FALSE
ACTR3B	346.448	0.00568337	0.278258	0.0204248	0.983704	1	FALSE
ACTR3C	4.20285	0.0868155	0.230923	0.37595	0.706954	1	FALSE
ACTR3P2	0.924723	-0.0281337	0.122525	-0.229615	0.818391	1	FALSE
ACTR5	384.837	0.191865	0.251037	0.764289	0.444695	1	FALSE
ACTR6	709.472	-0.123547	0.274565	-0.449972	0.65273	1	FALSE
ACTR8	676.431	-0.100055	0.249254	-0.401418	0.688112	1	FALSE
ACTRT1	1.08143	0.0732125	0.100225	0.730482	0.465096	1	FALSE
ACTRT3	96.3194	0.0231942	0.300966	0.0770658	0.938571	1	FALSE
ACVR1	812.06	0.0607402	0.244754	0.248168	0.804004	1	FALSE
ACVR1B	2411.77	-0.258659	0.228125	-1.13385	0.256857	1	FALSE
ACVR1C	20.4894	-0.171911	0.303254	-0.566888	0.570791	1	FALSE
ACVR2A	686.656	-0.31861	0.259419	-1.22817	0.219384	1	FALSE
ACVR2B	6206.79	-0.309139	0.247046	-1.25134	0.210809	1	FALSE
ACVR2B-AS1	162.901	-0.122232	0.266197	-0.459179	0.646105	1	FALSE
ACVRL1	1.68925	0.193622	0.13897	1.39327	0.163539	1	FALSE
ACY1	22.3763	0.496712	0.293244	1.69385	0.0902931	1	FALSE
ACY3	0.642134	-0.0351439	0.100615	-0.34929	0.726872	1	FALSE
ACYP1	88.6437	0.295402	0.280714	1.05232	0.292651	1	FALSE
ACYP2	117.718	-0.0139606	0.288241	-0.0484337	0.961371	1	FALSE
AD000684.2	8.82722	0.128414	0.274507	0.467798	0.639929	1	FALSE
AD000864.6	8.08151	-0.228021	0.266243	-0.85644	0.391755	1	FALSE
AD001527.4	6.95521	-0.0488674	0.244948	-0.199501	0.841871	1	FALSE
ADA	391.885	0.40626	0.298782	1.35972	0.173918	1	FALSE
ADAD2	2.53872	-0.144623	0.171033	-0.845585	0.397784	1	FALSE
ADAL	246.3	-0.145596	0.263951	-0.551601	0.581222	1	FALSE
ADAM10	4903.86	-0.426305	0.259697	-1.64155	0.100684	1	FALSE
ADAM11	85.6398	-0.0498518	0.307587	-0.162074	0.871248	1	FALSE
ADAM12	21.7725	-0.366814	0.296819	-1.23582	0.216526	1	FALSE
ADAM15	223.536	0.528385	0.305257	1.73095	0.0834603	1	FALSE
ADAM17	2036.1	-0.348807	0.258406	-1.34984	0.177067	1	FALSE
ADAM18	1.46304	-0.0336815	0.150745	-0.223434	0.823198	1	FALSE
ADAM19	12623.9	-0.0618615	0.259101	-0.238754	0.811296	1	FALSE
ADAM2	5.79643	-0.202503	0.209059	-0.968644	0.332723	1	FALSE
ADAM20	2.04341	0.132993	0.170982	0.77782	0.436675	1	FALSE
ADAM20P1	7.89177	0.0182621	0.261847	0.0697434	0.944398	1	FALSE
ADAM21	6.76274	0.150941	0.252419	0.597977	0.549855	1	FALSE
ADAM21P1	1.0672	0.0355354	0.128198	0.277191	0.781634	1	FALSE
ADAM22	154.292	-0.114002	0.286728	-0.397596	0.690928	1	FALSE
ADAM23	593.135	-0.485413	0.247429	-1.96183	0.049782	1	FALSE
ADAM28	65.2574	0.150812	0.303375	0.497112	0.61911	1	FALSE
ADAM29	15.5194	-0.121993	0.292612	-0.416911	0.676743	1	FALSE
ADAM32	2.81953	0.035079	0.199875	0.175505	0.860683	1	FALSE
ADAM33	49.0937	0.661024	0.307348	2.15074	0.031497	1	FALSE
ADAM8	34.6143	0.30804	0.307113	1.00302	0.315853	1	FALSE
ADAM9	804.661	-0.128361	0.289976	-0.442662	0.65801	1	FALSE
ADAMTS1	747.831	-0.172382	0.274722	-0.627476	0.530347	1	FALSE
ADAMTS10	298.534	0.198408	0.288323	0.688144	0.491362	1	FALSE
ADAMTS12	1622.53	-0.140103	0.306183	-0.457581	0.647254	1	FALSE
ADAMTS13	561.792	-0.221454	0.294037	-0.753149	0.45136	1	FALSE
ADAMTS14	8.4022	0.174166	0.271874	0.640613	0.521774	1	FALSE
ADAMTS15	54.2937	-0.0562664	0.304603	-0.18472	0.853448	1	FALSE
ADAMTS16	174.332	-0.747114	0.289713	-2.5788	0.0099143	1	FALSE
ADAMTS17	22.4829	-0.241845	0.277584	-0.871247	0.383619	1	FALSE
ADAMTS18	1877.14	0.018588	0.30332	0.0612817	0.951135	1	FALSE
ADAMTS19	645.953	-0.204104	0.277094	-0.736588	0.461373	1	FALSE
ADAMTS19-AS1	22.5087	-0.220542	0.307149	-0.718028	0.47274	1	FALSE
ADAMTS2	322.901	-0.203554	0.277875	-0.732539	0.46384	1	FALSE
ADAMTS20	120.114	-0.303162	0.238514	-1.27104	0.203713	1	FALSE
ADAMTS3	107.002	-0.358518	0.287738	-1.24599	0.212769	1	FALSE
ADAMTS4	116.635	-0.264275	0.282565	-0.935273	0.349648	1	FALSE
ADAMTS5	284.583	-0.233714	0.29922	-0.781077	0.434757	1	FALSE
ADAMTS6	53.7804	-0.408183	0.306288	-1.33268	0.182637	1	FALSE
ADAMTS7	1137.93	0.422504	0.280115	1.50832	0.131472	1	FALSE
ADAMTS7P1	11.8958	-0.289861	0.277896	-1.04305	0.296923	1	FALSE
ADAMTS7P3	20.0399	-0.273297	0.302378	-0.903826	0.366088	1	FALSE
ADAMTS7P4	0.401267	-0.000105368	0.0747468	-0.00140967	0.998875	1	FALSE
ADAMTS8	971.094	-0.243391	0.251706	-0.966968	0.33356	1	FALSE
ADAMTS9	358.301	-0.043164	0.298851	-0.144433	0.885158	1	FALSE
ADAMTS9-AS2	9.22281	-0.228682	0.262416	-0.871446	0.38351	1	FALSE
ADAMTSL1	39.7698	0.681664	0.305892	2.22844	0.0258509	1	FALSE
ADAMTSL2	5.92328	-0.108572	0.233036	-0.465901	0.641287	1	FALSE
ADAMTSL3	44.7724	-0.265617	0.30291	-0.876886	0.380548	1	FALSE
ADAMTSL4	108.055	-0.194927	0.289872	-0.67246	0.501291	1	FALSE
ADAMTSL4-AS1	5.15332	0.122621	0.218313	0.561675	0.574338	1	FALSE
ADAMTSL5	49.2134	0.694248	0.306933	2.26189	0.0237043	1	FALSE
ADAP1	40.2998	0.493235	0.300745	1.64004	0.100996	1	FALSE
ADAP2	19.1213	-0.183439	0.29971	-0.612055	0.540501	1	FALSE
ADAR	9544.04	-0.0417633	0.250087	-0.166995	0.867374	1	FALSE
ADARB1	354.48	-0.205003	0.255508	-0.802335	0.422359	1	FALSE
ADARB2	28.7056	0.19614	0.307737	0.63736	0.52389	1	FALSE
ADAT1	427.49	-0.0571674	0.241874	-0.236352	0.81316	1	FALSE
ADAT2	187.199	-0.107924	0.29432	-0.366689	0.713851	1	FALSE
ADAT3	152.312	0.954933	0.297647	3.20827	0.00133536	1	FALSE
ADCK1	108.455	0.176155	0.307784	0.572333	0.567096	1	FALSE
ADCK2	560.343	0.0832604	0.260267	0.319904	0.749041	1	FALSE
ADCK5	282.904	0.631145	0.281968	2.23836	0.0251979	1	FALSE
ADCY1	531.155	-0.193307	0.279406	-0.691849	0.489032	1	FALSE
ADCY10	85.6373	-0.190652	0.307906	-0.619187	0.535793	1	FALSE
ADCY10P1	97.915	0.243895	0.289479	0.842529	0.399492	1	FALSE
ADCY2	1774.7	-0.0228126	0.265804	-0.0858248	0.931606	1	FALSE
ADCY3	516.825	-0.00317675	0.262245	-0.0121137	0.990335	1	FALSE
ADCY4	1.91772	0.134349	0.171242	0.784553	0.432716	1	FALSE
ADCY5	369.853	0.0266927	0.263978	0.101117	0.919458	1	FALSE
ADCY6	1604.68	-0.164716	0.292841	-0.562477	0.573791	1	FALSE
ADCY7	519.032	0.259404	0.296872	0.873793	0.382231	1	FALSE
ADCY8	502.824	-0.784908	0.286398	-2.74062	0.00613228	1	FALSE
ADCY9	176.15	0.232013	0.293728	0.789888	0.429593	1	FALSE
ADCYAP1	0.405828	0	0.0747468	0	1	1	FALSE
ADCYAP1R1	79.9145	0.114232	0.298921	0.382148	0.702352	1	FALSE
ADD1	9835.52	0.0332987	0.233859	0.142388	0.886774	1	FALSE
ADD2	749.332	0.0025871	0.274906	0.00941087	0.992491	1	FALSE
ADD3	3925.94	-0.199116	0.280546	-0.709744	0.477863	1	FALSE
ADD3-AS1	10.4349	0.135885	0.283926	0.478593	0.632228	1	FALSE
ADGB	1.23013	-0.0302829	0.136399	-0.222017	0.8243	1	FALSE
ADGRA1	199.225	0.0626092	0.304411	0.205673	0.837046	1	FALSE
ADGRA1-AS1	52.2267	-0.458755	0.30142	-1.52198	0.128014	1	FALSE
ADGRA2	11.675	0.355994	0.263994	1.34849	0.1775	1	FALSE
ADGRA3	2526.96	0.0221294	0.238409	0.0928209	0.926046	1	FALSE
ADGRB1	284.217	0.770883	0.305469	2.52361	0.0116158	1	FALSE
ADGRB2	630.591	0.284056	0.238936	1.18884	0.234504	1	FALSE
ADGRB3	12.861	-0.12334	0.294991	-0.418113	0.675865	1	FALSE
ADGRD1	16.3027	0.219604	0.299315	0.73369	0.463138	1	FALSE
ADGRD2	1.41141	-0.0809989	0.136047	-0.595372	0.551595	1	FALSE
ADGRE2	1.53005	-0.0276439	0.135204	-0.204461	0.837993	1	FALSE
ADGRE5	54.9322	0.19475	0.307907	0.632495	0.527063	1	FALSE
ADGRF2	207.785	-0.0798739	0.295728	-0.270092	0.787089	1	FALSE
ADGRF3	4.90484	-0.0704797	0.231001	-0.305106	0.760285	1	FALSE
ADGRF4	124.861	-0.0728625	0.297974	-0.244527	0.806823	1	FALSE
ADGRF5	0.539613	0	0.0785107	0	1	1	FALSE
ADGRF5P1	5.25537	-0.0230099	0.230221	-0.0999471	0.920386	1	FALSE
ADGRG1	15.6843	0.144299	0.294186	0.490504	0.623777	1	FALSE
ADGRG2	1206.43	-0.814249	0.252708	-3.22209	0.00127259	1	FALSE
ADGRG3	2.86589	0.166008	0.189255	0.877165	0.380397	1	FALSE
ADGRG5	62.7604	0.294043	0.307656	0.955753	0.339197	1	FALSE
ADGRG6	95.4016	-0.114247	0.307556	-0.371468	0.710289	1	FALSE
ADGRG7	37.5313	-0.198706	0.30046	-0.661337	0.508396	1	FALSE
ADGRL1	2722.05	0.245388	0.283391	0.865898	0.386546	1	FALSE
ADGRL2	2668.98	-0.17622	0.245857	-0.71676	0.473522	1	FALSE
ADGRL3	235.721	-0.297361	0.255453	-1.16406	0.244402	1	FALSE
ADGRL4	0.557554	0.0426668	0.0788901	0.540839	0.588619	1	FALSE
ADGRV1	1146.21	-0.0479788	0.307073	-0.156246	0.875839	1	FALSE
ADH5	6913.98	-0.124753	0.236879	-0.526654	0.598434	1	FALSE
ADH5P2	0.848416	-0.0536652	0.104536	-0.513365	0.607696	1	FALSE
ADH5P3	2.17499	-0.0345345	0.17828	-0.193709	0.846404	1	FALSE
ADH5P4	33.8504	-0.0997985	0.307903	-0.324123	0.745845	1	FALSE
ADH6	1.01905	-0.0429264	0.134078	-0.32016	0.748847	1	FALSE
ADHFE1	91.6631	0.127279	0.300232	0.423937	0.671611	1	FALSE
ADI1	1805.93	0.0550915	0.25959	0.212225	0.831932	1	FALSE
ADIPOQ	0.460503	-0.0590982	0.0752458	-0.785401	0.432218	1	FALSE
ADIPOR1	3206.25	0.218801	0.233182	0.938329	0.348075	1	FALSE
ADIPOR1P2	0.814031	-0.0445721	0.101027	-0.441189	0.659076	1	FALSE
ADIPOR2	3186.07	-0.316568	0.265087	-1.19421	0.232397	1	FALSE
ADIRF	1.18091	-0.0160607	0.103549	-0.155102	0.876741	1	FALSE
ADIRF-AS1	123.856	0.0747487	0.303991	0.245891	0.805767	1	FALSE
ADK	553.275	0.145373	0.244433	0.594737	0.55202	1	FALSE
ADM	517.797	0.349258	0.306959	1.1378	0.255205	1	FALSE
ADM2	626.847	0.0704205	0.277766	0.253525	0.799863	1	FALSE
ADM5	36.3157	0.218672	0.30372	0.719979	0.471538	1	FALSE
ADNP	6397.3	-0.257913	0.227939	-1.1315	0.257844	1	FALSE
ADNP-AS1	20.9024	-0.13685	0.305382	-0.448128	0.654061	1	FALSE
ADNP2	2392.89	-0.243459	0.232251	-1.04826	0.294518	1	FALSE
ADO	1132.61	0.0236827	0.24449	0.096866	0.922833	1	FALSE
ADORA1	200.776	0.307335	0.306811	1.00171	0.316485	1	FALSE
ADORA2A	3.31509	0.159759	0.194241	0.822481	0.410803	1	FALSE
ADORA2A-AS1	1.90091	0.145252	0.130081	1.11663	0.264154	1	FALSE
ADORA2B	32.0076	-0.16841	0.299384	-0.562521	0.573761	1	FALSE
ADPGK	3188.45	-0.10661	0.264957	-0.402365	0.687415	1	FALSE
ADPGK-AS1	10.8914	-0.0302283	0.271803	-0.111214	0.911447	1	FALSE
ADPRH	415.343	-0.403339	0.284956	-1.41545	0.156938	1	FALSE
ADPRHL1	30.137	0.0850879	0.306757	0.277379	0.781489	1	FALSE
ADPRHL2	895.114	-0.0126587	0.266774	-0.047451	0.962154	1	FALSE
ADPRM	137.546	-0.0233754	0.280081	-0.0834595	0.933486	1	FALSE
ADRA1A	4.74548	-0.0505117	0.203307	-0.248451	0.803786	1	FALSE
ADRA1B	1.64944	0.0516409	0.156002	0.331026	0.740625	1	FALSE
ADRA1D	2.02607	-0.0527289	0.15751	-0.334766	0.737802	1	FALSE
ADRA2A	103.369	0.247897	0.306383	0.809108	0.418453	1	FALSE
ADRA2B	61.0193	0.0717852	0.300524	0.238867	0.811209	1	FALSE
ADRA2C	1008.77	0.471078	0.285754	1.64854	0.0992415	1	FALSE
ADRB1	1.16394	0.0984991	0.132126	0.745492	0.455974	1	FALSE
ADRB2	11.8253	0.0572004	0.285515	0.200341	0.841214	1	FALSE
ADRB3	1.71001	-0.0275545	0.158942	-0.173362	0.862367	1	FALSE
ADRM1	3368.04	0.528965	0.288241	1.83515	0.0664835	1	FALSE
ADSL	3619.7	0.171614	0.250455	0.685207	0.493213	1	FALSE
ADSS	1109.05	-0.150006	0.275169	-0.545141	0.585656	1	FALSE
ADSSL1	177.615	0.0163306	0.287329	0.0568357	0.954676	1	FALSE
ADTRP	1.7977	-0.0475023	0.148204	-0.320519	0.748575	1	FALSE
AE000658.25	9.52485	-0.355127	0.262737	-1.35164	0.176489	1	FALSE
AE000661.37	17.3477	0.292441	0.296976	0.98473	0.324757	1	FALSE
AEBP1	2122.36	0.0980508	0.284815	0.344262	0.73065	1	FALSE
AEBP2	674.338	-0.292507	0.243827	-1.19965	0.230276	1	FALSE
AEN	2513.88	0.146323	0.274719	0.532628	0.594291	1	FALSE
AES	15772.3	0.20039	0.286571	0.69927	0.484383	1	FALSE
AF001548.5	5.24713	-0.0540953	0.215912	-0.250543	0.802167	1	FALSE
AF001548.6	0.200215	0	0.0747468	0	1	1	FALSE
AF003625.3	1.77469	0.0365793	0.15633	0.233987	0.814995	1	FALSE
AF011889.2	3.40243	-0.0671895	0.200185	-0.335637	0.737144	1	FALSE
AF011889.5	9.55659	-0.0507682	0.221964	-0.228723	0.819084	1	FALSE
AF013593.1	0.542695	-0.0502531	0.0866905	-0.579684	0.562128	1	FALSE
AF038458.3	1.36328	0.0217281	0.106073	0.204841	0.837697	1	FALSE
AF064858.10	8.70753	0.161063	0.260807	0.617558	0.536867	1	FALSE
AF064858.11	2.10718	0.113901	0.160633	0.70908	0.478275	1	FALSE
AF064858.6	2.19273	-0.00628106	0.155881	-0.040294	0.967859	1	FALSE
AF064858.7	0.301157	-0.000105368	0.0747468	-0.00140967	0.998875	1	FALSE
AF064858.8	2.55154	-0.0581541	0.185846	-0.312915	0.754346	1	FALSE
AF064860.5	0.369759	-0.0432605	0.0747468	-0.57876	0.562751	1	FALSE
AF064860.7	4.48039	0.00851481	0.224959	0.0378506	0.969807	1	FALSE
AF067845.1	2.39254	-0.0682067	0.150276	-0.453877	0.649917	1	FALSE
AF067845.2	1.24946	-0.101525	0.108162	-0.938636	0.347917	1	FALSE
AF067845.3	0.939157	-0.067857	0.106104	-0.639532	0.522477	1	FALSE
AF121897.4	0.445322	0.0222903	0.0751147	0.296751	0.766657	1	FALSE
AF127577.12	0.254999	0	0.0747468	0	1	1	FALSE
AF127936.7	2.36963	0.0204134	0.164655	0.123977	0.901334	1	FALSE
AF127936.9	22.3505	0.199584	0.306972	0.65017	0.515582	1	FALSE
AF129075.5	2.368	0.127525	0.158774	0.803186	0.421867	1	FALSE
AF129408.17	0.652859	0.03125	0.0913808	0.341975	0.732369	1	FALSE
AF131215.2	263.997	-0.490665	0.301958	-1.62495	0.104174	1	FALSE
AF131215.3	3.64391	-0.00705929	0.178607	-0.0395242	0.968472	1	FALSE
AF131215.4	1.77851	0.0659594	0.138209	0.477243	0.633189	1	FALSE
AF131215.6	0.250578	0.0214722	0.0747468	0.287265	0.773909	1	FALSE
AF131215.8	31.8969	-0.161254	0.307779	-0.523928	0.600328	1	FALSE
AF131215.9	152.515	-0.160732	0.265446	-0.605515	0.544837	1	FALSE
AF131216.1	27.9373	-0.241845	0.305268	-0.792238	0.428222	1	FALSE
AF131216.5	4.11767	-0.0167392	0.215815	-0.0775625	0.938176	1	FALSE
AF131216.6	0.350017	0.0430497	0.0747468	0.575941	0.564655	1	FALSE
AF131217.1	5.65679	-0.125008	0.222191	-0.562612	0.573699	1	FALSE
AF146191.4	10.1054	-0.00854186	0.281771	-0.0303149	0.975816	1	FALSE
AF165138.7	2.42698	0.176936	0.178305	0.992322	0.321041	1	FALSE
AF186192.5	0.254999	0	0.0747468	0	1	1	FALSE
AF196970.3	0.873832	0.00961836	0.120712	0.07968	0.936492	1	FALSE
AF196972.4	0.44911	0.0376263	0.0751404	0.500747	0.616549	1	FALSE
AF196972.9	1.53222	0.0489161	0.150614	0.324779	0.745348	1	FALSE
AF230666.2	0.262677	-0.0216829	0.0747468	-0.290085	0.771751	1	FALSE
AFAP1	1323.23	0.0695016	0.263818	0.263446	0.792207	1	FALSE
AFAP1-AS1	0.298985	0.0430497	0.0747468	0.575941	0.564655	1	FALSE
AFAP1L1	42.9395	-0.387935	0.307305	-1.26238	0.206813	1	FALSE
AFAP1L2	24.6315	-0.0846726	0.307487	-0.275369	0.783033	1	FALSE
AFDN	7595.83	-0.0364085	0.273311	-0.133213	0.894025	1	FALSE
AFDN-AS1	65.3915	0.180883	0.300566	0.601807	0.547303	1	FALSE
AFF1	4820.15	-0.405496	0.295272	-1.3733	0.16966	1	FALSE
AFF2	41.5028	-0.154148	0.303623	-0.507696	0.611667	1	FALSE
AFF3	27.9698	0.0179925	0.299255	0.0601244	0.952057	1	FALSE
AFF4	6901.86	-0.303677	0.283027	-1.07296	0.283288	1	FALSE
AFG3L1P	593.875	0.347647	0.285499	1.21768	0.223346	1	FALSE
AFG3L2	2485.11	-0.145927	0.231497	-0.630364	0.528456	1	FALSE
AFG3L2P1	0.801863	0.013807	0.108662	0.127063	0.89889	1	FALSE
AFM	0.293514	0.0430497	0.0747468	0.575941	0.564655	1	FALSE
AFMID	498.835	0.0844929	0.265082	0.318742	0.749922	1	FALSE
AFP	93.7624	-0.241349	0.298712	-0.807966	0.41911	1	FALSE
AFTPH	583.306	-0.131829	0.260003	-0.507029	0.612134	1	FALSE
AGA	504.163	0.0640697	0.248917	0.257393	0.796875	1	FALSE
AGAP1	1007.92	-0.24827	0.254453	-0.975701	0.329213	1	FALSE
AGAP1-IT1	2.30075	-0.0596494	0.181682	-0.328317	0.742672	1	FALSE
AGAP10P	1.27952	-0.0304192	0.139973	-0.217322	0.827958	1	FALSE
AGAP12P	0.6421	-0.0472177	0.0820589	-0.575413	0.565012	1	FALSE
AGAP13P	8.04743	0.0584666	0.262438	0.222783	0.823705	1	FALSE
AGAP2	4.93377	0.087338	0.204352	0.42739	0.669095	1	FALSE
AGAP2-AS1	2.33281	0.0635014	0.147182	0.431447	0.666143	1	FALSE
AGAP3	1552.25	0.263164	0.289774	0.90817	0.363789	1	FALSE
AGAP4	46.8211	0.166338	0.307153	0.541548	0.58813	1	FALSE
AGAP5	2.63042	0.0817152	0.186617	0.437877	0.661476	1	FALSE
AGAP6	129.765	0.305607	0.284815	1.073	0.283271	1	FALSE
AGAP7P	62.1146	0.0955966	0.297178	0.321681	0.747694	1	FALSE
AGAP9	67.9037	0.188808	0.307397	0.614214	0.539074	1	FALSE
AGBL1	6.14547	0.272359	0.234168	1.1631	0.244791	1	FALSE
AGBL2	56.0275	0.0936193	0.307509	0.304444	0.760789	1	FALSE
AGBL3	51.0986	-0.107299	0.301856	-0.355464	0.722242	1	FALSE
AGBL4	54.5338	-0.0758902	0.307844	-0.246522	0.805279	1	FALSE
AGBL5	2474.48	-0.0164911	0.250861	-0.0657379	0.947586	1	FALSE
AGBL5-AS1	0.614238	0.0350189	0.0806444	0.434239	0.664115	1	FALSE
AGBL5-IT1	0.456753	-0.000720409	0.081723	-0.00881525	0.992967	1	FALSE
AGER	349.843	-0.0641004	0.29312	-0.218683	0.826897	1	FALSE
AGFG1	2132.77	-0.137343	0.241008	-0.569867	0.568768	1	FALSE
AGFG2	1630.09	0.26573	0.253645	1.04765	0.294801	1	FALSE
AGGF1	1196.57	-0.171796	0.254055	-0.676216	0.498904	1	FALSE
AGGF1P3	2.4704	0.101533	0.17855	0.568656	0.569589	1	FALSE
AGK	656.116	-0.0602211	0.241866	-0.248986	0.803372	1	FALSE
AGKP1	0.423039	-0.0216829	0.0747468	-0.290085	0.771751	1	FALSE
AGL	1109.35	-0.299297	0.273756	-1.0933	0.274262	1	FALSE
AGMAT	104.578	-0.229603	0.292867	-0.783985	0.433049	1	FALSE
AGMO	20.6759	0.0430524	0.304554	0.141362	0.887584	1	FALSE
AGO1	2559.57	-0.0963051	0.248175	-0.388053	0.697977	1	FALSE
AGO2	3581.15	-0.0729525	0.278813	-0.261653	0.793589	1	FALSE
AGO3	643.394	-0.0807815	0.265152	-0.304662	0.760624	1	FALSE
AGO4	1097.36	-0.211774	0.280249	-0.755663	0.449851	1	FALSE
AGPAT1	5435.32	0.302601	0.277987	1.08854	0.276356	1	FALSE
AGPAT2	960.628	0.468581	0.288038	1.6268	0.103779	1	FALSE
AGPAT3	2778.47	0.0692078	0.260446	0.265728	0.790449	1	FALSE
AGPAT4	3352.26	-0.0835043	0.255371	-0.326992	0.743674	1	FALSE
AGPAT5	1788.96	-0.262492	0.25149	-1.04375	0.296602	1	FALSE
AGPS	2995.41	-0.070841	0.25838	-0.274174	0.783951	1	FALSE
AGR2	0.906176	-0.018999	0.0926684	-0.205022	0.837555	1	FALSE
AGR3	0.646697	-0.0253246	0.0842857	-0.300461	0.763826	1	FALSE
AGRN	5735.91	0.383468	0.263403	1.45582	0.145442	1	FALSE
AGT	1.41302	0.0617553	0.158933	0.388561	0.697601	1	FALSE
AGTPBP1	2005.81	-0.294873	0.275076	-1.07197	0.283735	1	FALSE
AGTR1	1.39198	0.0306602	0.128754	0.238131	0.811779	1	FALSE
AGTRAP	1406.15	0.381671	0.289173	1.31987	0.186878	1	FALSE
AGXT	1.07316	-0.0916439	0.130345	-0.703089	0.482	1	FALSE
AGXT2	0.201718	-0.0216829	0.0747468	-0.290085	0.771751	1	FALSE
AHCTF1	980.862	-0.224137	0.264079	-0.84875	0.39602	1	FALSE
AHCY	10160.8	0.0900001	0.264474	0.340298	0.733632	1	FALSE
AHCYL1	2975.48	0.100686	0.225447	0.446605	0.65516	1	FALSE
AHCYL2	931.377	-0.148318	0.237033	-0.625726	0.531494	1	FALSE
AHCYP2	0.313602	-0.0216829	0.0747468	-0.290085	0.771751	1	FALSE
AHCYP4	1.17821	-0.0162814	0.132086	-0.123264	0.901898	1	FALSE
AHCYP5	0.263023	-0.000105368	0.0747468	-0.00140967	0.998875	1	FALSE
AHCYP7	0.306594	-0.0216829	0.0747468	-0.290085	0.771751	1	FALSE
AHDC1	1112.59	0.489591	0.287606	1.7023	0.0886998	1	FALSE
AHI1	380.873	-0.130342	0.281983	-0.462234	0.643913	1	FALSE
AHNAK	10492.2	0.352042	0.307692	1.14414	0.252566	1	FALSE
AHNAK2	48.8185	0.307367	0.306829	1.00175	0.316462	1	FALSE
AHR	33.2709	-0.215392	0.30707	-0.701441	0.483028	1	FALSE
AHRR	25.2212	0.2914	0.30619	0.951698	0.34125	1	FALSE
AHSA1	2921.41	0.196725	0.251725	0.781509	0.434503	1	FALSE
AHSA2	2112.09	0.195976	0.307112	0.638125	0.523392	1	FALSE
AHSG	0.453529	-0.040465	0.0752061	-0.538054	0.590539	1	FALSE
AHSP	0.24634	-0.0216829	0.0747468	-0.290085	0.771751	1	FALSE
AICDA	0.949324	0.086715	0.107097	0.809683	0.418123	1	FALSE
AIDA	650.038	-0.217879	0.27591	-0.789675	0.429717	1	FALSE
AIF1	16.9091	-0.131416	0.293737	-0.447393	0.654591	1	FALSE
AIF1L	6104.72	0.016524	0.22249	0.0742687	0.940797	1	FALSE
AIFM1	1667.67	-0.102308	0.232325	-0.440365	0.659673	1	FALSE
AIFM2	248.027	0.100271	0.273896	0.366089	0.714299	1	FALSE
AIFM3	18.2437	0.0830954	0.302328	0.274852	0.78343	1	FALSE
AIG1	142.366	-0.116945	0.28225	-0.41433	0.678632	1	FALSE
AIM1	16.2594	-0.0378515	0.290399	-0.130343	0.896295	1	FALSE
AIM1L	53.6772	0.311328	0.306287	1.01646	0.30941	1	FALSE
AIM2	58.002	-0.506862	0.306081	-1.65597	0.0977273	1	FALSE
AIMP1	1054.09	-0.0434154	0.235022	-0.18473	0.853441	1	FALSE
AIMP1P1	0.199546	0.0214722	0.0747468	0.287265	0.773909	1	FALSE
AIMP2	1328.81	0.314586	0.286642	1.09749	0.272429	1	FALSE
AIP	884.56	0.35348	0.301621	1.17193	0.241223	1	FALSE
AIPL1	0.701025	0.0310276	0.09534	0.325442	0.744847	1	FALSE
AIRE	216.22	-0.0518203	0.302098	-0.171535	0.863803	1	FALSE
AJ003147.9	1.22697	0.034119	0.137652	0.247864	0.80424	1	FALSE
AJ011931.1	0.198878	0.0430497	0.0747468	0.575941	0.564655	1	FALSE
AJ011932.1	65.6506	0.0735432	0.306904	0.239629	0.810618	1	FALSE
AJAP1	2008.4	-0.317012	0.26479	-1.19722	0.231221	1	FALSE
AJUBA	963.074	-0.0373728	0.267063	-0.13994	0.888708	1	FALSE
AK1	52.276	0.187868	0.305679	0.614593	0.538823	1	FALSE
AK2	1078.96	-0.029699	0.249487	-0.11904	0.905244	1	FALSE
AK3	1711.21	0.0261588	0.228211	0.114626	0.908742	1	FALSE
AK3P3	8.33016	0.0812871	0.268331	0.302936	0.761939	1	FALSE
AK4	5608.12	-0.593588	0.29594	-2.00577	0.0448808	1	FALSE
AK4P1	0.977651	-0.0348862	0.108459	-0.321652	0.747716	1	FALSE
AK4P3	0.253314	-0.0432605	0.0747468	-0.57876	0.562751	1	FALSE
AK4P6	0.250578	0.0214722	0.0747468	0.287265	0.773909	1	FALSE
AK5	4.71526	0.0585408	0.237123	0.246879	0.805002	1	FALSE
AK6	439.315	-0.0621464	0.246595	-0.252018	0.801027	1	FALSE
AK6P1	0.194076	0.0214722	0.0747468	0.287265	0.773909	1	FALSE
AK7	68.3913	-0.328522	0.291615	-1.12656	0.259928	1	FALSE
AK8	65.2953	0.0271455	0.303249	0.0895156	0.928672	1	FALSE
AK9	42.0803	-0.392711	0.30785	-1.27566	0.202077	1	FALSE
AKAIN1	0.194744	0	0.0747468	0	1	1	FALSE
AKAP1	951.894	0.0803879	0.232372	0.345945	0.729384	1	FALSE
AKAP10	1035.18	-0.125398	0.269663	-0.465018	0.641919	1	FALSE
AKAP11	962.729	-0.319224	0.287809	-1.10915	0.267363	1	FALSE
AKAP12	1995.51	0.171588	0.250146	0.685949	0.492745	1	FALSE
AKAP13	4860.41	0.0523153	0.280895	0.186245	0.852253	1	FALSE
AKAP14	0.453876	0.0375532	0.0751467	0.499732	0.617264	1	FALSE
AKAP17A	2193.89	0.315223	0.243658	1.29371	0.195765	1	FALSE
AKAP17BP	17.011	0.0802848	0.290277	0.27658	0.782103	1	FALSE
AKAP2	0.515991	-0.0601175	0.0768141	-0.782637	0.43384	1	FALSE
AKAP3	14.6445	-0.293399	0.273075	-1.07443	0.282631	1	FALSE
AKAP4	0.259801	0.0214722	0.0747468	0.287265	0.773909	1	FALSE
AKAP5	52.7159	-0.31031	0.304061	-1.02055	0.307468	1	FALSE
AKAP6	179.586	-0.0641883	0.285972	-0.224456	0.822402	1	FALSE
AKAP7	179.832	-0.147521	0.269076	-0.548249	0.583521	1	FALSE
AKAP8	1187.25	0.0747075	0.239533	0.311888	0.755126	1	FALSE
AKAP8L	3301.21	0.175425	0.256554	0.683775	0.494117	1	FALSE
AKAP9	2583.44	0.223834	0.272248	0.822168	0.410981	1	FALSE
AKIP1	541.521	0.23953	0.240688	0.995187	0.319645	1	FALSE
AKIRIN1	5209.31	-0.089829	0.241466	-0.372015	0.709881	1	FALSE
AKIRIN2	1424.57	0.272629	0.292268	0.932805	0.350921	1	FALSE
AKIRIN2P1	0.562298	-0.0283032	0.0871296	-0.32484	0.745302	1	FALSE
AKNA	373.329	0.192774	0.266587	0.723117	0.469608	1	FALSE
AKNAD1	17.4391	0.195492	0.291748	0.670074	0.502811	1	FALSE
AKR1A1	2746.99	0.17423	0.25713	0.677596	0.498028	1	FALSE
AKR1B1	5515.02	0.239069	0.216417	1.10467	0.269304	1	FALSE
AKR1B10	1.46512	0.0138723	0.11771	0.117851	0.906186	1	FALSE
AKR1B1P1	0.973271	0.0416878	0.133014	0.313408	0.753971	1	FALSE
AKR1B1P2	0.958404	-0.0243709	0.103765	-0.234866	0.814313	1	FALSE
AKR1B1P3	0.976987	-0.00146643	0.116748	-0.0125607	0.989978	1	FALSE
AKR1B1P6	0.194744	0	0.0747468	0	1	1	FALSE
AKR1B1P7	0.70277	0.0249979	0.104935	0.238222	0.811709	1	FALSE
AKR1C1	7.21238	-0.106286	0.260918	-0.407354	0.683748	1	FALSE
AKR1C2	1.38649	0.0376892	0.133045	0.283281	0.776961	1	FALSE
AKR1C3	49.7593	0.397898	0.306838	1.29677	0.19471	1	FALSE
AKR1C7P	0.462536	-0.000105368	0.0747468	-0.00140967	0.998875	1	FALSE
AKR1C8P	1.75139	0.0247467	0.151457	0.163391	0.870211	1	FALSE
AKR1D1	0.316303	0.0214722	0.0747468	0.287265	0.773909	1	FALSE
AKR1E2	16.4427	0.14837	0.298475	0.497094	0.619123	1	FALSE
AKR7A2	911.791	0.349063	0.281395	1.24047	0.214801	1	FALSE
AKR7A2P1	0.294183	0.0214722	0.0747468	0.287265	0.773909	1	FALSE
AKR7A3	15.0858	0.312121	0.297169	1.05031	0.293573	1	FALSE
AKR7L	13.1374	0.204579	0.276468	0.739973	0.459316	1	FALSE
AKT1	4830.66	0.179932	0.264947	0.679123	0.49706	1	FALSE
AKT1S1	2175.53	0.389354	0.294586	1.3217	0.186269	1	FALSE
AKT2	5040.38	0.340492	0.233132	1.46051	0.144149	1	FALSE
AKT3	709.935	-0.141496	0.251721	-0.562114	0.574038	1	FALSE
AKT3-IT1	0.200215	0	0.0747468	0	1	1	FALSE
AKTIP	213.616	0.0837351	0.265764	0.315074	0.752706	1	FALSE
AL008723.1	6.30443	-0.0124012	0.246487	-0.0503119	0.959874	1	FALSE
AL022237.3	0.916065	-0.0571744	0.115295	-0.495895	0.619969	1	FALSE
AL022341.3	10.246	0.342003	0.273264	1.25155	0.210735	1	FALSE
AL022344.7	0.583401	-0.0190371	0.0789613	-0.241094	0.809483	1	FALSE
AL022393.9	10.3998	0.0553688	0.271934	0.203611	0.838658	1	FALSE
AL023806.1	5.99097	0.014293	0.236181	0.0605172	0.951744	1	FALSE
AL035610.1	14.4414	0.485355	0.295929	1.64011	0.100983	1	FALSE
AL035610.2	0.782763	-0.0635424	0.0983605	-0.646016	0.518269	1	FALSE
AL049794.1	1.15466	0.0451064	0.102672	0.439327	0.660425	1	FALSE
AL109767.1	0.683854	0.00810338	0.0941684	0.086052	0.931425	1	FALSE
AL121578.2	1.11417	0.0416965	0.123	0.338998	0.734612	1	FALSE
AL132709.1	169.775	-0.0765191	0.307357	-0.248958	0.803393	1	FALSE
AL133168.3	0.511429	0.063624	0.0765624	0.831009	0.405969	1	FALSE
AL133243.1	10.9225	-0.172797	0.284311	-0.607775	0.543337	1	FALSE
AL133243.2	11.0236	-0.113825	0.284311	-0.400353	0.688897	1	FALSE
AL133243.4	0.656611	0.0272887	0.100717	0.270944	0.786434	1	FALSE
AL133245.2	0.355142	0.0214722	0.0747468	0.287265	0.773909	1	FALSE
AL133493.2	10.7321	0.249996	0.275524	0.907347	0.364223	1	FALSE
AL135787.1	0.250578	0.0214722	0.0747468	0.287265	0.773909	1	FALSE
AL136419.6	14.9169	0.36478	0.290458	1.25588	0.20916	1	FALSE
AL157871.2	1.02637	-0.0195087	0.126152	-0.154644	0.877102	1	FALSE
AL161668.5	2.68146	-0.108443	0.184991	-0.58621	0.557735	1	FALSE
AL163953.3	59.7498	0.439861	0.305691	1.43891	0.150176	1	FALSE
AL354828.1	0.296355	-0.0216829	0.0747468	-0.290085	0.771751	1	FALSE
AL355480.1	1.28609	0.0291469	0.140146	0.207975	0.835248	1	FALSE
AL356053.1	3.63587	-0.215185	0.212058	-1.01475	0.310227	1	FALSE
AL356585.1	0.357314	-0.0216829	0.0747468	-0.290085	0.771751	1	FALSE
AL357140.1	0.198878	0.0430497	0.0747468	0.575941	0.564655	1	FALSE
AL358852.1	5.60529	0.159787	0.23863	0.669601	0.503112	1	FALSE
AL360294.1	2.3771	-0.0479556	0.172706	-0.277671	0.781265	1	FALSE
AL365181.1	18.2609	-0.278309	0.303274	-0.917682	0.358785	1	FALSE
AL450992.2	24.7994	-0.192609	0.306335	-0.628752	0.529511	1	FALSE
AL513523.2	5.4494	0.0377121	0.208377	0.180981	0.856383	1	FALSE
AL590762.11	1.25619	0.035943	0.136492	0.263334	0.792293	1	FALSE
AL590762.6	1.94071	0.0928907	0.157975	0.58801	0.556526	1	FALSE
AL590762.7	3.27295	0.0437094	0.199099	0.219536	0.826233	1	FALSE
AL590763.16	39.8265	0.201042	0.301145	0.667592	0.504394	1	FALSE
AL590763.5	0.406702	-0.0216829	0.0747468	-0.290085	0.771751	1	FALSE
AL591893.1	1.47899	-0.0571037	0.137418	-0.415546	0.677742	1	FALSE
ALAD	3820.62	0.105642	0.247813	0.426295	0.669893	1	FALSE
ALAS1	1170.59	-0.217985	0.265205	-0.821947	0.411107	1	FALSE
ALAS2	32.1016	0.343104	0.307883	1.1144	0.265108	1	FALSE
ALB	4.11669	-0.0524518	0.224197	-0.233955	0.81502	1	FALSE
ALCAM	746.176	-0.059941	0.275978	-0.217195	0.828056	1	FALSE
ALDH16A1	1364.25	0.627625	0.250935	2.50114	0.0123794	1	FALSE
ALDH18A1	2397.46	-0.250087	0.238038	-1.05062	0.293434	1	FALSE
ALDH1A1	129.425	-0.351666	0.302184	-1.16375	0.244525	1	FALSE
ALDH1A2	3.0463	0.0518809	0.19105	0.271556	0.785963	1	FALSE
ALDH1A3	672.213	-0.126872	0.243262	-0.521543	0.601988	1	FALSE
ALDH1B1	1551.75	-0.306393	0.263201	-1.1641	0.244382	1	FALSE
ALDH1L1	6.58979	0.0473309	0.254982	0.185624	0.852739	1	FALSE
ALDH1L2	22.8475	0.0978024	0.294826	0.331729	0.740094	1	FALSE
ALDH2	1439.8	0.168192	0.22893	0.734687	0.46253	1	FALSE
ALDH3A1	15.3077	0.0109893	0.290763	0.0377947	0.969851	1	FALSE
ALDH3A2	4450.37	-0.157431	0.252508	-0.623468	0.532977	1	FALSE
ALDH3B1	2.16686	0.150812	0.159267	0.946916	0.343682	1	FALSE
ALDH3B2	0.501375	-0.00388356	0.0838918	-0.0462925	0.963077	1	FALSE
ALDH4A1	284.456	0.168982	0.254264	0.664592	0.506311	1	FALSE
ALDH5A1	164.206	-0.273293	0.271606	-1.00621	0.314314	1	FALSE
ALDH6A1	871.721	-0.0588838	0.238263	-0.247138	0.804801	1	FALSE
ALDH7A1	3448.61	-0.147649	0.219308	-0.673251	0.500787	1	FALSE
ALDH7A1P1	6.1191	-0.075614	0.238937	-0.316459	0.751654	1	FALSE
ALDH8A1	3.03752	0.0298318	0.192353	0.155089	0.876751	1	FALSE
ALDH9A1	1710.27	-0.157628	0.238898	-0.659812	0.509374	1	FALSE
ALDOA	44581.6	-0.143173	0.306277	-0.467461	0.64017	1	FALSE
ALDOAP1	3.22155	-0.254937	0.193043	-1.32062	0.186628	1	FALSE
ALDOAP2	3.26337	-0.250614	0.198176	-1.2646	0.206015	1	FALSE
ALDOC	1299.97	-0.350779	0.306462	-1.14461	0.252371	1	FALSE
ALG1	501.467	0.28544	0.245074	1.16471	0.244137	1	FALSE
ALG10	108.131	-0.28463	0.278683	-1.02134	0.307094	1	FALSE
ALG10B	226.396	-0.417162	0.275551	-1.51392	0.130046	1	FALSE
ALG11	236.261	-0.147004	0.307726	-0.477712	0.632855	1	FALSE
ALG12	797.561	0.340441	0.283409	1.20124	0.22966	1	FALSE
ALG13	924.097	-0.0846605	0.263409	-0.321403	0.747905	1	FALSE
ALG14	228.339	0.378558	0.261493	1.44768	0.147706	1	FALSE
ALG1L	19.6244	0.066073	0.296925	0.222524	0.823906	1	FALSE
ALG1L13P	3.35742	0.14238	0.204572	0.69599	0.486435	1	FALSE
ALG1L15P	0.890863	0.063364	0.101744	0.622781	0.533428	1	FALSE
ALG1L2	56.3161	-0.131285	0.301442	-0.435523	0.663183	1	FALSE
ALG1L3P	0.406519	0.0430497	0.0747468	0.575941	0.564655	1	FALSE
ALG1L5P	4.61664	0.225886	0.232741	0.970548	0.331774	1	FALSE
ALG1L6P	0.354437	0.0214722	0.0747468	0.287265	0.773909	1	FALSE
ALG1L7P	78.7491	0.0836633	0.306595	0.272878	0.784947	1	FALSE
ALG1L8P	4.85589	-0.1646	0.238511	-0.690115	0.490122	1	FALSE
ALG1L9P	5.7209	0.0369175	0.237319	0.155561	0.876379	1	FALSE
ALG2	902.657	0.134194	0.233096	0.575705	0.564815	1	FALSE
ALG3	834.996	0.415963	0.307786	1.35147	0.176546	1	FALSE
ALG5	478.736	0.0974658	0.279749	0.348404	0.727537	1	FALSE
ALG6	387.311	0.0239313	0.249256	0.0960108	0.923512	1	FALSE
ALG8	1352.01	0.00465994	0.236542	0.0197002	0.984283	1	FALSE
ALG9	149.125	-0.231877	0.287689	-0.805999	0.420243	1	FALSE
ALK	60.8134	-0.0162972	0.307908	-0.0529287	0.957789	1	FALSE
ALKBH1	389.171	-0.0908133	0.244732	-0.371072	0.710584	1	FALSE
ALKBH2	304.063	-0.0257974	0.269696	-0.0956538	0.923796	1	FALSE
ALKBH3	423.015	0.111766	0.279901	0.399305	0.689668	1	FALSE
ALKBH4	391.222	0.178163	0.289307	0.615826	0.538009	1	FALSE
ALKBH5	2430.62	-0.156348	0.262446	-0.595736	0.551352	1	FALSE
ALKBH6	97.5683	0.0807864	0.300871	0.268508	0.788308	1	FALSE
ALKBH7	1358.63	0.710677	0.306475	2.31887	0.0204019	1	FALSE
ALKBH8	186.97	-0.144126	0.283127	-0.509052	0.610716	1	FALSE
ALMS1	1825.39	-0.044224	0.297959	-0.148423	0.882009	1	FALSE
ALMS1-IT1	54.7498	0.237522	0.300942	0.789263	0.429958	1	FALSE
ALMS1P1	3.11535	-0.190409	0.205191	-0.927959	0.353429	1	FALSE
ALOX12	3.58338	0.126918	0.209362	0.606212	0.544374	1	FALSE
ALOX12-AS1	25.31	0.156613	0.306693	0.510649	0.609597	1	FALSE
ALOX12B	11.964	-0.232995	0.277625	-0.839242	0.401334	1	FALSE
ALOX12P2	164.377	0.0534201	0.300288	0.177896	0.858805	1	FALSE
ALOX15	5.08044	-0.31455	0.191288	-1.64437	0.100099	1	FALSE
ALOX15B	3.23288	-0.177587	0.191068	-0.929444	0.352659	1	FALSE
ALOX5	11.1448	0.217941	0.271016	0.804162	0.421303	1	FALSE
ALOX5AP	0.818034	-0.00124937	0.0990302	-0.0126161	0.989934	1	FALSE
ALOXE3	1.61576	-0.0348052	0.148254	-0.234768	0.814389	1	FALSE
ALPK1	2.88989	0.0324525	0.196691	0.164992	0.86895	1	FALSE
ALPK2	98.5821	0.411717	0.307092	1.3407	0.180019	1	FALSE
ALPK3	5609.67	0.0682769	0.284801	0.239735	0.810536	1	FALSE
ALPL	6339.45	0.303691	0.294569	1.03096	0.302557	1	FALSE
ALPPL2	0.49657	-0.0172739	0.0754648	-0.228899	0.818947	1	FALSE
ALS2	2625.41	-0.0913547	0.282918	-0.322902	0.746769	1	FALSE
ALS2CL	260.728	0.0195855	0.295426	0.0662957	0.947142	1	FALSE
ALS2CR11	0.321245	-0.064838	0.0747468	-0.867435	0.385704	1	FALSE
ALS2CR12	5.46168	0.33872	0.240543	1.40815	0.159087	1	FALSE
ALX1	20.0547	0.299485	0.302227	0.990928	0.321721	1	FALSE
ALX3	1.29762	-0.0836401	0.121499	-0.688399	0.491201	1	FALSE
ALX4	0.461555	0.0173664	0.0752199	0.230876	0.817411	1	FALSE
ALYREF	2363.37	0.230113	0.282874	0.813481	0.415942	1	FALSE
AMACR	72.9381	0.160425	0.300921	0.533115	0.593954	1	FALSE
AMBP	31.1314	-0.0374812	0.299164	-0.125286	0.900297	1	FALSE
AMBRA1	3056.25	0.00575242	0.230028	0.0250075	0.980049	1	FALSE
AMD1	2619.42	-0.210001	0.271298	-0.774059	0.438896	1	FALSE
AMD1P3	0.753779	-0.0540621	0.0992901	-0.544486	0.586107	1	FALSE
AMD1P4	0.262677	-0.0216829	0.0747468	-0.290085	0.771751	1	FALSE
AMDHD1	6.15501	0.173824	0.247081	0.703512	0.481737	1	FALSE
AMDHD2	1205.16	0.354169	0.236701	1.49627	0.134582	1	FALSE
AMELY	0.449779	0.0225886	0.0812541	0.278	0.781012	1	FALSE
AMER1	898.489	-0.0835892	0.264963	-0.315476	0.752401	1	FALSE
AMER2	14.9072	0.152867	0.28804	0.530715	0.595616	1	FALSE
AMER3	7.33202	-0.0420936	0.254713	-0.165259	0.86874	1	FALSE
AMFR	2188.78	0.0042523	0.253633	0.0167656	0.986624	1	FALSE
AMH	245.879	0.321048	0.301903	1.06341	0.287595	1	FALSE
AMHR2	597.516	0.410642	0.270136	1.52013	0.128479	1	FALSE
AMIGO1	85.4815	-0.0855725	0.29894	-0.286253	0.774684	1	FALSE
AMIGO2	187.093	-0.317353	0.268951	-1.17997	0.238014	1	FALSE
AMMECR1	1938.47	0.00730419	0.271416	0.0269114	0.97853	1	FALSE
AMMECR1L	1473.63	-0.358838	0.239647	-1.49736	0.134299	1	FALSE
AMMECR1LP1	2.81351	-0.00158173	0.197975	-0.00798955	0.993625	1	FALSE
AMN	132.971	1.00784	0.307619	3.27626	0.00105192	1	FALSE
AMN1	224.993	0.248475	0.259693	0.9568	0.338668	1	FALSE
AMOT	1390.86	0.0950303	0.286279	0.331949	0.739927	1	FALSE
AMOTL1	5041.41	-0.0261535	0.270678	-0.0966222	0.923026	1	FALSE
AMOTL2	4853.46	-0.169354	0.222734	-0.760343	0.447049	1	FALSE
AMPD2	907.018	0.183053	0.277927	0.658636	0.510129	1	FALSE
AMPD3	141.714	-0.18386	0.299418	-0.614059	0.539176	1	FALSE
AMPH	41.4472	0.00795261	0.304717	0.0260983	0.979179	1	FALSE
AMT	13.9472	0.0991178	0.296455	0.334344	0.73812	1	FALSE
AMY2B	27.8079	-0.204256	0.307871	-0.663447	0.507044	1	FALSE
AMZ1	11.9357	0.136262	0.290305	0.469375	0.638802	1	FALSE
AMZ2	1575.27	-0.005294	0.246172	-0.0215053	0.982843	1	FALSE
AMZ2P1	205.32	-0.0787673	0.286747	-0.274692	0.783553	1	FALSE
ANAPC1	903.504	0.0317447	0.281208	0.112887	0.91012	1	FALSE
ANAPC10	282.885	0.0484716	0.268179	0.180743	0.856569	1	FALSE
ANAPC10P1	0.260469	0	0.0747468	0	1	1	FALSE
ANAPC11	2391.04	0.668569	0.303232	2.20481	0.0274671	1	FALSE
ANAPC13	802.439	-0.223217	0.242597	-0.920112	0.357514	1	FALSE
ANAPC15	831.166	0.213063	0.283254	0.7522	0.451931	1	FALSE
ANAPC16	2305.48	-0.241803	0.241408	-1.00163	0.31652	1	FALSE
ANAPC1P1	0.41094	0.0214722	0.0747468	0.287265	0.773909	1	FALSE
ANAPC2	1055.02	0.1839	0.247904	0.741819	0.458197	1	FALSE
ANAPC4	1160.35	-0.071087	0.285318	-0.24915	0.803245	1	FALSE
ANAPC5	3557.89	0.153304	0.226305	0.677423	0.498137	1	FALSE
ANAPC7	1565.42	0.152287	0.230998	0.659256	0.509731	1	FALSE
ANG	90.2011	0.469181	0.306514	1.5307	0.125843	1	FALSE
ANGEL1	829.903	0.183582	0.290387	0.632196	0.527259	1	FALSE
ANGEL2	1568.65	-0.244545	0.268995	-0.909108	0.363293	1	FALSE
ANGPT1	642.027	-0.499631	0.252641	-1.97764	0.0479699	1	FALSE
ANGPT2	374.548	0.260568	0.299832	0.869049	0.38482	1	FALSE
ANGPT4	53.5518	-0.072249	0.303023	-0.238428	0.811549	1	FALSE
ANGPTL2	558.911	-0.0361967	0.278328	-0.130051	0.896526	1	FALSE
ANGPTL4	481.218	0.173635	0.29981	0.579149	0.562489	1	FALSE
ANGPTL6	3.53109	-0.0687753	0.213316	-0.322411	0.747141	1	FALSE
ANGPTL7	1.063	-0.00276295	0.12069	-0.0228929	0.981736	1	FALSE
ANGPTL8	0.200215	0	0.0747468	0	1	1	FALSE
ANK1	12.5765	0.0208432	0.287558	0.0724836	0.942217	1	FALSE
ANK2	2007.08	0.040862	0.306729	0.133219	0.89402	1	FALSE
ANK3	840.905	-0.000846324	0.251611	-0.00336362	0.997316	1	FALSE
ANKAR	49.1809	-0.198145	0.305462	-0.648672	0.51655	1	FALSE
ANKDD1A	1203.92	0.158535	0.293154	0.540791	0.588652	1	FALSE
ANKDD1B	63.8143	-0.228173	0.307551	-0.741903	0.458146	1	FALSE
ANKEF1	426.492	-0.477189	0.24036	-1.98532	0.0471094	1	FALSE
ANKFN1	0.614907	0.0231715	0.0906855	0.255515	0.798325	1	FALSE
ANKFY1	2919.39	0.111521	0.280395	0.397727	0.690832	1	FALSE
ANKH	481.024	0.344996	0.255318	1.35124	0.176618	1	FALSE
ANKHD1	72.5662	0.0949516	0.307706	0.308579	0.757642	1	FALSE
ANKHD1-EIF4EBP3	26.7134	0.220107	0.307167	0.716572	0.473638	1	FALSE
ANKIB1	1705.86	-0.256385	0.2697	-0.95063	0.341792	1	FALSE
ANKK1	3.32958	0.226134	0.204273	1.10702	0.268286	1	FALSE
ANKLE1	165.585	-0.256453	0.277426	-0.924401	0.355278	1	FALSE
ANKLE2	2680.95	-0.0107399	0.263647	-0.040736	0.967506	1	FALSE
ANKMY1	183.695	0.125596	0.278812	0.45047	0.652371	1	FALSE
ANKMY2	1116.84	-0.0507593	0.231586	-0.219181	0.826509	1	FALSE
ANKRA2	310.583	-0.0167864	0.27124	-0.0618878	0.950652	1	FALSE
ANKRD1	1189.62	0.363338	0.285456	1.27283	0.203077	1	FALSE
ANKRD10	1728.13	0.00833815	0.264158	0.031565	0.974819	1	FALSE
ANKRD10-IT1	84.3123	0.116645	0.300945	0.387597	0.698314	1	FALSE
ANKRD11	4083.98	0.299448	0.241801	1.23841	0.215565	1	FALSE
ANKRD12	1332.86	0.276733	0.302791	0.913941	0.360748	1	FALSE
ANKRD13A	2505.17	0.0643442	0.246737	0.26078	0.794262	1	FALSE
ANKRD13B	16.7337	0.437706	0.292753	1.49514	0.134878	1	FALSE
ANKRD13C	751.254	-0.129021	0.273233	-0.4722	0.636784	1	FALSE
ANKRD13D	788.647	0.429276	0.268759	1.59725	0.110209	1	FALSE
ANKRD16	229.627	0.283956	0.276955	1.02528	0.305232	1	FALSE
ANKRD17	4561.17	0.0229208	0.225893	0.101467	0.91918	1	FALSE
ANKRD18A	48.7949	-0.00754373	0.307903	-0.0245003	0.980454	1	FALSE
ANKRD18B	9.97063	0.108852	0.268886	0.404826	0.685606	1	FALSE
ANKRD18CP	113.915	-0.080115	0.307718	-0.260352	0.794592	1	FALSE
ANKRD19P	63.2308	0.0837607	0.296388	0.282605	0.77748	1	FALSE
ANKRD20A11P	16.6372	-0.466425	0.289577	-1.61071	0.107243	1	FALSE
ANKRD20A18P	2.95016	0.137853	0.18957	0.727187	0.467111	1	FALSE
ANKRD20A4	1.03629	-0.0262344	0.118656	-0.221097	0.825017	1	FALSE
ANKRD20A5P	0.240869	-0.0216829	0.0747468	-0.290085	0.771751	1	FALSE
ANKRD23	6.71697	0.0805004	0.260376	0.30917	0.757192	1	FALSE
ANKRD24	113.245	0.407009	0.307757	1.3225	0.186002	1	FALSE
ANKRD26	730.291	0.0712486	0.255003	0.279403	0.779936	1	FALSE
ANKRD26P4	0.255703	0	0.0747468	0	1	1	FALSE
ANKRD27	1484.85	-0.136663	0.236236	-0.578503	0.562925	1	FALSE
ANKRD28	1238.14	-0.335337	0.246151	-1.36233	0.173095	1	FALSE
ANKRD29	5.93457	0.0537117	0.249061	0.215657	0.829255	1	FALSE
ANKRD31	4.97026	-0.015706	0.237498	-0.0661308	0.947274	1	FALSE
ANKRD33	25.3656	-0.17371	0.26938	-0.64485	0.519024	1	FALSE
ANKRD33B	487.245	-0.108812	0.273798	-0.397417	0.69106	1	FALSE
ANKRD34A	115.058	0.194385	0.304352	0.638685	0.523028	1	FALSE
ANKRD34B	3.95739	0.00322554	0.222874	0.0144724	0.988453	1	FALSE
ANKRD35	34.1673	-0.0227744	0.30738	-0.0740918	0.940937	1	FALSE
ANKRD36	117.08	0.323552	0.306342	1.05618	0.290886	1	FALSE
ANKRD36B	35.9556	0.15632	0.293027	0.533466	0.593711	1	FALSE
ANKRD36BP2	3.71592	-0.174463	0.213557	-0.81694	0.413963	1	FALSE
ANKRD36C	38.2781	0.21803	0.298607	0.73016	0.465293	1	FALSE
ANKRD37	131.336	0.157762	0.299003	0.527625	0.597759	1	FALSE
ANKRD39	98.1974	0.246879	0.292375	0.844394	0.398449	1	FALSE
ANKRD40	1976.8	-0.29716	0.255174	-1.16454	0.244206	1	FALSE
ANKRD42	404.411	-0.210654	0.284965	-0.739228	0.459768	1	FALSE
ANKRD44	4.67133	0.085736	0.228442	0.375308	0.707432	1	FALSE
ANKRD45	18.1467	-0.18395	0.29943	-0.614334	0.538995	1	FALSE
ANKRD46	670.593	-0.32664	0.244809	-1.33427	0.182117	1	FALSE
ANKRD49	388.908	0.00395668	0.261029	0.015158	0.987906	1	FALSE
ANKRD50	1385.36	-0.257331	0.290921	-0.884541	0.376404	1	FALSE
ANKRD52	2377.8	0.0366409	0.274531	0.133467	0.893824	1	FALSE
ANKRD53	32.7187	0.487014	0.294853	1.65172	0.0985925	1	FALSE
ANKRD54	346.289	0.113876	0.296296	0.384333	0.700732	1	FALSE
ANKRD6	4374.26	-0.171836	0.275165	-0.624486	0.532308	1	FALSE
ANKRD61	2.90346	0.0609764	0.181449	0.336052	0.736831	1	FALSE
ANKRD65	17.8099	0.411482	0.300338	1.37006	0.170667	1	FALSE
ANKRD7	4.47747	0.0754765	0.224477	0.336232	0.736696	1	FALSE
ANKRD9	365.919	0.628325	0.307535	2.0431	0.0410425	1	FALSE
ANKS1A	2305.89	-0.160105	0.249209	-0.642454	0.520578	1	FALSE
ANKS1B	1573.01	-0.224148	0.247824	-0.904465	0.365749	1	FALSE
ANKS3	515.822	0.43225	0.248501	1.73943	0.0819587	1	FALSE
ANKS4B	1.55957	0.0391086	0.141203	0.276967	0.781805	1	FALSE
ANKS6	1733.55	0.0323507	0.231814	0.139555	0.889012	1	FALSE
ANKUB1	0.505958	0.0632928	0.0762408	0.830169	0.406443	1	FALSE
ANKZF1	2330.57	-0.148673	0.291051	-0.510814	0.609482	1	FALSE
ANLN	2489.61	-0.185655	0.274573	-0.676157	0.498941	1	FALSE
ANO1	67.8425	-0.249656	0.300727	-0.830173	0.406441	1	FALSE
ANO10	2025.62	-0.109	0.230571	-0.472738	0.6364	1	FALSE
ANO2	173.159	-0.18409	0.30639	-0.600835	0.54795	1	FALSE
ANO3	0.766569	-0.0513507	0.107668	-0.476935	0.633408	1	FALSE
ANO4	137.911	-0.0765029	0.29961	-0.255342	0.798459	1	FALSE
ANO5	204.035	-0.0232509	0.278321	-0.0835397	0.933422	1	FALSE
ANO6	2581.03	-0.214171	0.260367	-0.822572	0.410751	1	FALSE
ANO7	112.446	0.171306	0.297288	0.576231	0.564459	1	FALSE
ANO7L1	7.10011	0.0989039	0.244626	0.404306	0.685988	1	FALSE
ANO8	897.959	0.252863	0.263445	0.959833	0.337139	1	FALSE
ANO9	449.449	-0.070576	0.291132	-0.242419	0.808455	1	FALSE
ANOS1	413.024	-0.23116	0.265825	-0.869593	0.384523	1	FALSE
ANOS2P	284.429	-0.121216	0.272839	-0.444275	0.656844	1	FALSE
ANP32A	9736.19	-0.186526	0.236525	-0.788613	0.430338	1	FALSE
ANP32AP1	6.38098	0.0892545	0.254415	0.350822	0.725722	1	FALSE
ANP32B	6727.35	0.104148	0.252279	0.412829	0.679732	1	FALSE
ANP32BP1	9.60146	-0.0276495	0.281131	-0.0983509	0.921654	1	FALSE
ANP32BP3	1.01838	-0.07927	0.119708	-0.662193	0.507848	1	FALSE
ANP32C	8.76663	0.0600791	0.268551	0.223716	0.822979	1	FALSE
ANP32D	2.33652	0.0346909	0.158495	0.218877	0.826746	1	FALSE
ANP32E	2850.92	-0.393805	0.246744	-1.59601	0.110488	1	FALSE
ANPEP	33.6035	0.424146	0.289213	1.46655	0.142498	1	FALSE
ANTXR1	1570.71	-0.183802	0.230681	-0.79678	0.425579	1	FALSE
ANTXR2	153.878	0.043815	0.273606	0.160139	0.872771	1	FALSE
ANTXRLP1	0.194744	0	0.0747468	0	1	1	FALSE
ANXA1	68.83	0.312058	0.30457	1.02459	0.305559	1	FALSE
ANXA11	4754.6	0.106952	0.270973	0.394698	0.693066	1	FALSE
ANXA13	0.569617	-0.0234693	0.087572	-0.268	0.7887	1	FALSE
ANXA2	10982.4	0.361721	0.260371	1.38925	0.164757	1	FALSE
ANXA2P1	3.06612	0.02435	0.166877	0.145916	0.883988	1	FALSE
ANXA2P2	32.2058	0.120903	0.307651	0.392988	0.694329	1	FALSE
ANXA2P3	1.86343	0.0301611	0.173845	0.173494	0.862263	1	FALSE
ANXA2R	12.2491	0.395647	0.272516	1.45183	0.146549	1	FALSE
ANXA3	1282.01	-0.397244	0.259583	-1.53032	0.125938	1	FALSE
ANXA4	582.982	-0.0880242	0.269824	-0.326228	0.744252	1	FALSE
ANXA5	8784.96	0.112472	0.233686	0.481296	0.630306	1	FALSE
ANXA6	8673.81	0.354584	0.236625	1.49851	0.134002	1	FALSE
ANXA7	2877.55	0.125881	0.220802	0.570108	0.568604	1	FALSE
ANXA8L1	9.20558	-0.135998	0.270581	-0.502615	0.615235	1	FALSE
ANXA9	7.5895	-0.0396839	0.249856	-0.158827	0.873805	1	FALSE
AOAH	4.09139	0.0957099	0.225853	0.42377	0.671733	1	FALSE
AOC2	38.3625	-0.166501	0.307771	-0.540989	0.588515	1	FALSE
AOC3	18.5663	-0.0218443	0.301581	-0.0724326	0.942258	1	FALSE
AOC4P	0.355487	0.0430497	0.0747468	0.575941	0.564655	1	FALSE
AOX1	357.589	0.0974543	0.26789	0.363785	0.716018	1	FALSE
AP000221.1	0.335506	-0.0216829	0.0747468	-0.290085	0.771751	1	FALSE
AP000223.42	1.36394	-0.0109669	0.129675	-0.0845724	0.932601	1	FALSE
AP000230.1	5.15433	-0.168276	0.226875	-0.741712	0.458262	1	FALSE
AP000233.4	0.200215	0	0.0747468	0	1	1	FALSE
AP000240.9	1.63809	-0.0388029	0.161914	-0.239652	0.8106	1	FALSE
AP000251.3	22.1934	0.352636	0.301935	1.16792	0.242838	1	FALSE
AP000253.1	0.513783	-0.0510762	0.0850789	-0.600339	0.54828	1	FALSE
AP000254.8	11.8027	-0.0959726	0.274476	-0.349658	0.726596	1	FALSE
AP000255.6	6.38708	-0.137747	0.256746	-0.536511	0.591606	1	FALSE
AP000265.1	1.14624	0.0506396	0.122582	0.413108	0.679528	1	FALSE
AP000266.7	1.14267	-0.0476644	0.122103	-0.390364	0.696268	1	FALSE
AP000280.66	0.416411	0.0214722	0.0747468	0.287265	0.773909	1	FALSE
AP000281.1	2.78034	-0.187072	0.196931	-0.949937	0.342144	1	FALSE
AP000302.58	0.60467	0.0232203	0.0901766	0.257498	0.796794	1	FALSE
AP000318.2	13.0536	0.036113	0.291458	0.123905	0.901391	1	FALSE
AP000320.6	2.88737	-0.0815094	0.189618	-0.429862	0.667296	1	FALSE
AP000320.7	3.16745	0.0152051	0.199997	0.0760268	0.939398	1	FALSE
AP000343.1	0.462569	0.0248789	0.0821347	0.302904	0.761963	1	FALSE
AP000344.3	6.29935	0.0525734	0.238498	0.220436	0.825532	1	FALSE
AP000344.4	6.5472	0.207281	0.251107	0.825468	0.409106	1	FALSE
AP000345.1	0.259801	0.0214722	0.0747468	0.287265	0.773909	1	FALSE
AP000345.4	1.2305	0.0904275	0.128036	0.706265	0.480023	1	FALSE
AP000347.2	54.991	0.737267	0.307823	2.3951	0.0166157	1	FALSE
AP000347.4	3.95802	0.302186	0.215566	1.40182	0.160968	1	FALSE
AP000349.2	1.00041	0.013141	0.0886804	0.148184	0.882198	1	FALSE
AP000350.5	18.7935	0.190447	0.287653	0.662072	0.507925	1	FALSE
AP000351.13	0.805828	0.0306031	0.0902146	0.339226	0.734439	1	FALSE
AP000351.3	5.81324	0.109914	0.246885	0.445203	0.656173	1	FALSE
AP000354.2	1.49212	-0.0290797	0.141016	-0.206216	0.836622	1	FALSE
AP000357.4	0.724867	-0.051314	0.0947392	-0.541634	0.588071	1	FALSE
AP000361.2	0.263023	-0.000105368	0.0747468	-0.00140967	0.998875	1	FALSE
AP000432.1	8.86843	0.112582	0.271072	0.415321	0.677907	1	FALSE
AP000436.4	0.70172	-0.0648554	0.0865028	-0.749749	0.453406	1	FALSE
AP000437.3	6.19609	0.221055	0.225976	0.978221	0.327965	1	FALSE
AP000438.2	9.58624	-0.00521462	0.271906	-0.019178	0.984699	1	FALSE
[truncated: 27,884 more rows]

## Sheet: S3C
gene_short_name	baseMean	log2FoldChange	lfcSE	stat	pvalue	padj	differentially_expressed
GATA6-AS1	2732.9	3.00476	0.300905	9.98575	1.75963e-23	5.25883e-19	TRUE
5S_rRNA	0.805266	0.0336096	0.109873	0.305896	0.759684	1	FALSE
A1BG	4.54505	0.0350962	0.206832	0.169684	0.865258	1	FALSE
A1BG-AS1	201.788	-0.0986104	0.269658	-0.365687	0.714599	1	FALSE
A1CF	2.1051	-0.0254798	0.163545	-0.155797	0.876193	1	FALSE
A2M	0.618131	-0.000443645	0.0896261	-0.00494995	0.996051	1	FALSE
A2M-AS1	21.0232	0.137865	0.305115	0.451845	0.65138	1	FALSE
A2ML1	472.429	-0.138637	0.275441	-0.503328	0.614734	1	FALSE
A2MP1	0.778493	-0.0305897	0.0968046	-0.315994	0.752007	1	FALSE
A3GALT2	0.506141	-0.02752	0.0845781	-0.325379	0.744894	1	FALSE
A4GALT	109.558	-0.0611454	0.307784	-0.198663	0.842526	1	FALSE
AAAS	1744.15	0.131037	0.247613	0.5292	0.596667	1	FALSE
AACS	2073.07	-0.0598776	0.228656	-0.261868	0.793423	1	FALSE
AACSP1	0.642482	0.0515244	0.0910962	0.565604	0.571663	1	FALSE
AADACL3	1.88041	0.115088	0.153401	0.750244	0.453108	1	FALSE
AADACL4	0.784127	0.0574508	0.0793828	0.723719	0.469238	1	FALSE
AADAT	1697.35	-0.166035	0.251991	-0.658893	0.509965	1	FALSE
AAED1	120.086	-0.0696449	0.286284	-0.243272	0.807795	1	FALSE
AAGAB	3396.11	0.157194	0.273672	0.57439	0.565704	1	FALSE
AAK1	519.28	-0.36166	0.255685	-1.41447	0.157223	1	FALSE
AAMDC	408.33	0.120668	0.273768	0.440769	0.65938	1	FALSE
AAMP	3313.77	0.144955	0.251017	0.57747	0.563622	1	FALSE
AANAT	11.8584	-0.124628	0.271501	-0.459032	0.646211	1	FALSE
AAR2	1085.37	0.0985299	0.249401	0.395066	0.692794	1	FALSE
AARD	6.49112	0.0190041	0.246328	0.0771498	0.938504	1	FALSE
AARS	7563.2	0.0250678	0.273858	0.0915358	0.927067	1	FALSE
AARS2	844.993	0.0261235	0.243535	0.107268	0.914576	1	FALSE
AARSD1	40.8802	-0.394131	0.306945	-1.28404	0.199126	1	FALSE
AASDH	480.106	-0.0413437	0.298463	-0.138522	0.889828	1	FALSE
AASDHPPT	1558.23	0.118377	0.252414	0.468981	0.639083	1	FALSE
AASS	973.479	-0.145214	0.298297	-0.486812	0.626392	1	FALSE
AATBC	0.96503	-0.0575502	0.105807	-0.543918	0.586498	1	FALSE
AATF	2983.42	0.0569326	0.223753	0.254444	0.799152	1	FALSE
AATK	31.6822	-0.0823964	0.307619	-0.267852	0.788813	1	FALSE
AB015752.3	0.703093	-0.000406797	0.111533	-0.00364733	0.99709	1	FALSE
AB019441.29	11.8172	-0.0380008	0.285615	-0.133049	0.894154	1	FALSE
ABALON	1.40566	-0.0950081	0.138535	-0.685805	0.492836	1	FALSE
ABAT	179.904	0.179464	0.266461	0.67351	0.500623	1	FALSE
ABC11-4932300O16.1	0.311882	0.0427812	0.0747468	0.572348	0.567086	1	FALSE
ABC12-49244600F4.4	11.5515	-0.0146951	0.274347	-0.053564	0.957283	1	FALSE
ABC13-47488600E17.1	1.9462	-0.0906721	0.170304	-0.532413	0.59444	1	FALSE
ABC13-47656900H15.1	1.39392	-0.0116565	0.13738	-0.0848488	0.932382	1	FALSE
ABCA1	2260.19	-0.395841	0.298561	-1.32583	0.184896	1	FALSE
ABCA10	7.95328	-0.418797	0.267965	-1.56288	0.118082	1	FALSE
ABCA11P	25.0905	0.342068	0.307761	1.11148	0.266364	1	FALSE
ABCA12	1.51558	-0.122382	0.126596	-0.966715	0.333687	1	FALSE
ABCA13	0.924091	0.0545462	0.122705	0.444531	0.656659	1	FALSE
ABCA17P	0.260469	-0.043529	0.0747468	-0.582352	0.560329	1	FALSE
ABCA2	702.526	0.102992	0.260619	0.395184	0.692707	1	FALSE
ABCA3	336.907	-0.191688	0.256813	-0.74641	0.45542	1	FALSE
ABCA4	16.4725	-0.0250104	0.294997	-0.0847819	0.932435	1	FALSE
ABCA5	175.54	-0.564744	0.293442	-1.92455	0.054286	1	FALSE
ABCA6	1.58817	-0.000487839	0.135019	-0.00361311	0.997117	1	FALSE
ABCA7	2236.68	-0.193902	0.266968	-0.726313	0.467647	1	FALSE
ABCA8	1.64646	0.0443691	0.153081	0.289842	0.771937	1	FALSE
ABCA9	1.45199	0.0170154	0.121177	0.140417	0.88833	1	FALSE
ABCA9-AS1	1.85774	0.00711396	0.152312	0.0467066	0.962747	1	FALSE
ABCB1	2.65434	0.070096	0.155543	0.450655	0.652238	1	FALSE
ABCB10	617.936	0.0183621	0.261672	0.070172	0.944057	1	FALSE
ABCB10P1	2.71359	0.0508308	0.18827	0.269988	0.787169	1	FALSE
ABCB10P4	0.214163	0	0.0747468	0	1	1	FALSE
ABCB11	0.766569	0.0366182	0.107175	0.341667	0.732601	1	FALSE
ABCB4	6.76065	0.112591	0.25083	0.448874	0.653523	1	FALSE
ABCB5	0.214163	0	0.0747468	0	1	1	FALSE
ABCB6	89.3591	-0.264286	0.299357	-0.882845	0.37732	1	FALSE
ABCB7	1005.85	0.131801	0.248578	0.530218	0.595961	1	FALSE
ABCB8	847.441	-0.169903	0.250103	-0.679332	0.496928	1	FALSE
ABCB9	75.2977	0.0361394	0.300446	0.120286	0.904257	1	FALSE
ABCC1	2321.91	0.0180019	0.251204	0.0716626	0.94287	1	FALSE
ABCC10	1026.32	-0.0625518	0.262059	-0.238694	0.811343	1	FALSE
ABCC11	7.53287	-0.110856	0.25431	-0.435909	0.662903	1	FALSE
ABCC12	10.428	0.111435	0.264685	0.421009	0.673748	1	FALSE
ABCC2	22.8378	-0.0758993	0.305327	-0.248584	0.803683	1	FALSE
ABCC3	0.950507	0.141922	0.109468	1.29647	0.194812	1	FALSE
ABCC4	3680.36	-0.0619298	0.29678	-0.208672	0.834704	1	FALSE
ABCC5	1287.08	-0.032664	0.274969	-0.118791	0.905441	1	FALSE
ABCC6	13.5977	-0.219629	0.294427	-0.745954	0.455695	1	FALSE
ABCC6P1	12.0784	-0.15396	0.288706	-0.533275	0.593843	1	FALSE
ABCC6P2	1.724	-0.131446	0.15147	-0.867807	0.3855	1	FALSE
ABCC8	6.61582	0.0331915	0.246398	0.134707	0.892844	1	FALSE
ABCC9	3.41027	-0.0628521	0.199476	-0.315086	0.752696	1	FALSE
ABCD1	1419.65	-0.0106725	0.302823	-0.0352433	0.971886	1	FALSE
ABCD1P4	0.194744	-0.0219514	0.0747468	-0.293677	0.769005	1	FALSE
ABCD2	0.189273	0	0.0747468	0	1	1	FALSE
ABCD3	751.754	0.0753964	0.240888	0.312993	0.754286	1	FALSE
ABCD4	3240.22	-0.156196	0.258173	-0.605004	0.545176	1	FALSE
ABCE1	1759.08	0.090557	0.2567	0.352774	0.724258	1	FALSE
ABCF1	4547.92	0.0979752	0.245367	0.3993	0.689672	1	FALSE
ABCF2	1975.99	0.0796901	0.247441	0.322057	0.747409	1	FALSE
ABCF2P1	0.807761	-0.043514	0.101703	-0.427852	0.668759	1	FALSE
ABCF3	1165.98	0.0413995	0.238583	0.173523	0.86224	1	FALSE
ABCG1	176.983	-0.0907384	0.274866	-0.330119	0.74131	1	FALSE
ABCG2	8.47621	0.187343	0.243445	0.769549	0.441567	1	FALSE
ABCG4	218.358	0.0134432	0.296467	0.0453447	0.963833	1	FALSE
ABCG8	0.292465	0	0.0747468	0	1	1	FALSE
ABHD1	1.91077	0.0629235	0.16196	0.388513	0.697636	1	FALSE
ABHD10	610.182	0.204359	0.237341	0.861036	0.389218	1	FALSE
ABHD11	826.944	-0.15216	0.269016	-0.565618	0.571654	1	FALSE
ABHD11-AS1	5.20195	-0.0070306	0.238331	-0.0294993	0.976466	1	FALSE
ABHD12	1898.66	-0.0389847	0.282929	-0.13779	0.890407	1	FALSE
ABHD12B	31.2626	0.217731	0.307237	0.708675	0.478526	1	FALSE
ABHD13	522.082	0.00687129	0.256686	0.0267693	0.978644	1	FALSE
ABHD14A	132.079	-0.0367874	0.307822	-0.119509	0.904872	1	FALSE
ABHD14A-ACY1	0.454581	0.0177345	0.0752814	0.235577	0.813761	1	FALSE
ABHD14B	256.674	0.00579818	0.265164	0.0218664	0.982554	1	FALSE
ABHD15	56.3534	-0.105286	0.303251	-0.34719	0.728448	1	FALSE
ABHD16A	67.6934	-0.27089	0.30055	-0.901313	0.367422	1	FALSE
ABHD16B	0.600644	-0.0884865	0.0758494	-1.16661	0.243369	1	FALSE
ABHD17A	473.132	-0.0861407	0.266923	-0.322718	0.746909	1	FALSE
ABHD17AP1	2.12048	0.186131	0.175572	1.06014	0.289082	1	FALSE
ABHD17AP3	0.89963	-0.06178	0.0848025	-0.728517	0.466297	1	FALSE
ABHD17AP5	0.294183	-0.000373885	0.0747468	-0.00500202	0.996009	1	FALSE
ABHD17AP6	0.311882	0.0427812	0.0747468	0.572348	0.567086	1	FALSE
ABHD17B	961.79	-0.109011	0.24351	-0.447666	0.654394	1	FALSE
ABHD17C	552.113	-0.225118	0.256575	-0.877396	0.380272	1	FALSE
ABHD18	553.2	-0.183241	0.270492	-0.677438	0.498128	1	FALSE
ABHD2	731.294	-0.0222183	0.270323	-0.0821915	0.934494	1	FALSE
ABHD3	593.969	-0.234011	0.276671	-0.845811	0.397658	1	FALSE
ABHD4	2156.76	0.203327	0.263303	0.772219	0.439985	1	FALSE
ABHD5	450.709	-0.0632502	0.257139	-0.245977	0.8057	1	FALSE
ABHD6	359.274	-0.258279	0.283466	-0.911147	0.362218	1	FALSE
ABHD8	333.267	0.0813708	0.307251	0.264835	0.791137	1	FALSE
ABI1	1179.63	0.0114545	0.238089	0.0481101	0.961629	1	FALSE
ABI2	3077.65	-0.0507138	0.227747	-0.222677	0.823787	1	FALSE
ABI3	30.3084	0.140061	0.288772	0.485024	0.62766	1	FALSE
ABI3BP	4.49046	-0.234802	0.231989	-1.01213	0.311477	1	FALSE
ABL1	3901.03	0.0642983	0.240523	0.267327	0.789218	1	FALSE
ABL2	952.91	-0.147668	0.251211	-0.587825	0.55665	1	FALSE
ABLIM1	1470.7	-0.0226957	0.283561	-0.0800383	0.936207	1	FALSE
ABLIM2	24.6538	-0.239198	0.305243	-0.78363	0.433257	1	FALSE
ABLIM3	2.38359	0.0234109	0.186192	0.125735	0.899941	1	FALSE
ABO	4.78664	-0.0696605	0.231149	-0.301366	0.763135	1	FALSE
ABR	2053.29	-0.00228877	0.246295	-0.00929276	0.992586	1	FALSE
ABRACL	528.285	0.0762675	0.267612	0.284993	0.77565	1	FALSE
ABT1	1382.8	0.167776	0.263124	0.637631	0.523714	1	FALSE
ABTB1	168.76	-0.0121067	0.278199	-0.043518	0.965289	1	FALSE
ABTB2	397.782	-0.191259	0.244499	-0.782249	0.434068	1	FALSE
AC000032.2	0.499869	-0.0492841	0.0755865	-0.652023	0.514387	1	FALSE
AC000035.3	0.200215	-0.043529	0.0747468	-0.582352	0.560329	1	FALSE
AC000068.10	3.84575	-0.120198	0.200203	-0.600381	0.548252	1	FALSE
AC000068.5	60.1961	-0.0805788	0.297099	-0.271219	0.786223	1	FALSE
AC000068.9	5.3875	-0.0873567	0.241366	-0.361926	0.717407	1	FALSE
AC000089.3	6.16158	-0.148927	0.248112	-0.600243	0.548344	1	FALSE
AC000095.12	1.29829	0.0195992	0.131089	0.149511	0.881151	1	FALSE
AC000095.9	0.259801	-0.000373885	0.0747468	-0.00500202	0.996009	1	FALSE
AC000120.7	2.06765	-0.141905	0.146787	-0.966745	0.333671	1	FALSE
AC000123.2	17.9468	-0.402354	0.29552	-1.36151	0.173353	1	FALSE
AC000123.3	3.04455	-0.115619	0.201476	-0.573861	0.566062	1	FALSE
AC000403.4	0.571822	0.0233191	0.0790463	0.295006	0.76799	1	FALSE
AC001226.7	1.47053	0.0190957	0.151632	0.125934	0.899784	1	FALSE
AC002044.4	4.91804	-0.0585526	0.198129	-0.295527	0.767591	1	FALSE
AC002056.3	2.78815	-0.0261654	0.188288	-0.138965	0.889478	1	FALSE
AC002059.10	1.02315	-0.0424702	0.118209	-0.35928	0.719386	1	FALSE
AC002064.7	0.194744	-0.0219514	0.0747468	-0.293677	0.769005	1	FALSE
AC002066.1	0.253314	0	0.0747468	0	1	1	FALSE
AC002069.5	0.608802	0.035333	0.098731	0.357872	0.720439	1	FALSE
AC002075.3	0.194076	0.0212037	0.0747468	0.283673	0.776661	1	FALSE
AC002075.4	5.29203	0.0907179	0.233461	0.388578	0.697588	1	FALSE
AC002076.10	0.462892	-0.0368044	0.0752992	-0.488775	0.625001	1	FALSE
AC002115.5	0.795557	-0.000451462	0.108057	-0.00417799	0.996666	1	FALSE
AC002116.7	4.52647	0.012998	0.230441	0.0564049	0.955019	1	FALSE
AC002117.1	1.92245	-0.0127614	0.165759	-0.0769876	0.938633	1	FALSE
AC002310.10	0.240869	0	0.0747468	0	1	1	FALSE
AC002310.12	53.6717	-0.0493954	0.307657	-0.160554	0.872445	1	FALSE
AC002310.14	2.67038	-0.12638	0.188666	-0.669863	0.502945	1	FALSE
AC002310.7	1.28403	0.0471276	0.138523	0.340215	0.733695	1	FALSE
AC002331.1	0.457421	-0.0224656	0.0818591	-0.274443	0.783744	1	FALSE
AC002398.11	0.501375	-0.000511743	0.0840109	-0.00609139	0.99514	1	FALSE
AC002398.12	0.198878	0.0427812	0.0747468	0.572348	0.567086	1	FALSE
AC002454.1	20.4477	0.102996	0.301748	0.34133	0.732855	1	FALSE
AC002456.2	0.649002	0.0721625	0.0934069	0.772561	0.439782	1	FALSE
AC002463.3	0.255703	-0.0219514	0.0747468	-0.293677	0.769005	1	FALSE
AC002467.7	29.0061	0.193616	0.307128	0.63041	0.528426	1	FALSE
AC002480.2	51.9929	-0.168915	0.307892	-0.548617	0.583268	1	FALSE
AC002480.3	3.48054	0.0349688	0.201371	0.173653	0.862138	1	FALSE
AC002480.5	125.831	-0.298231	0.276863	-1.07718	0.2814	1	FALSE
AC002486.3	0.603331	0.0618965	0.0983957	0.629057	0.529312	1	FALSE
AC002511.2	0.454258	0.0759309	0.0752566	1.00896	0.312994	1	FALSE
AC002519.6	0.451951	0	0.0752073	0	1	1	FALSE
AC002519.8	1.61321	-0.0240117	0.144644	-0.166006	0.868152	1	FALSE
AC002550.5	1.31604	-0.110822	0.123517	-0.897219	0.369602	1	FALSE
AC002550.6	5.36386	-0.143577	0.244873	-0.586334	0.557651	1	FALSE
AC002551.1	0.199546	-0.000373885	0.0747468	-0.00500202	0.996009	1	FALSE
AC003002.6	1.16016	-0.00130992	0.139839	-0.00936733	0.992526	1	FALSE
AC003003.5	28.8933	0.111462	0.304645	0.365875	0.714458	1	FALSE
AC003005.2	1.39999	-0.151079	0.128899	-1.17208	0.241165	1	FALSE
AC003009.1	2.83978	-0.120574	0.181713	-0.663543	0.506983	1	FALSE
AC003075.4	0.656934	-0.0644988	0.100756	-0.640146	0.522078	1	FALSE
AC003080.4	0.626153	0.0316929	0.0812906	0.389872	0.696631	1	FALSE
AC003104.1	2.83683	0.103521	0.175909	0.588488	0.556205	1	FALSE
AC003664.1	1.79129	0.110294	0.144359	0.764026	0.444852	1	FALSE
AC003682.16	1.17215	0.0271697	0.142978	0.190027	0.849288	1	FALSE
AC003973.3	0.448061	0	0.0747468	0	1	1	FALSE
AC003986.7	0.316303	-0.000373885	0.0747468	-0.00500202	0.996009	1	FALSE
AC004019.10	3.54992	-0.135423	0.198521	-0.682161	0.495137	1	FALSE
AC004019.13	1.92617	0.0518021	0.174641	0.296621	0.766756	1	FALSE
AC004051.2	0.194744	-0.0219514	0.0747468	-0.293677	0.769005	1	FALSE
AC004057.1	0.240869	0	0.0747468	0	1	1	FALSE
AC004067.5	0.352753	0.0212037	0.0747468	0.283673	0.776661	1	FALSE
AC004069.2	2.27279	-0.173216	0.171852	-1.00794	0.313484	1	FALSE
AC004076.5	28.2782	-0.546293	0.297267	-1.83772	0.0661039	1	FALSE
AC004076.7	0.255035	0.0212037	0.0747468	0.283673	0.776661	1	FALSE
AC004076.9	0.207189	-0.0219514	0.0747468	-0.293677	0.769005	1	FALSE
AC004156.3	6.25936	-0.0540464	0.233285	-0.231675	0.816791	1	FALSE
AC004160.4	23.1046	-0.2469	0.30711	-0.803945	0.421429	1	FALSE
AC004221.2	7.15933	-0.0775048	0.261958	-0.295868	0.767331	1	FALSE
AC004231.2	0.346447	-0.043529	0.0747468	-0.582352	0.560329	1	FALSE
AC004381.6	98.5276	0.0762324	0.295074	0.25835	0.796137	1	FALSE
AC004383.3	0.904106	-0.0109055	0.113389	-0.0961783	0.923379	1	FALSE
AC004386.4	6.69208	-0.0796027	0.25451	-0.312768	0.754457	1	FALSE
AC004448.5	276.826	-0.459532	0.306132	-1.50109	0.133332	1	FALSE
AC004449.6	0.420163	-0.0219514	0.0747468	-0.293677	0.769005	1	FALSE
AC004453.8	37.9974	0.118969	0.307886	0.386408	0.699194	1	FALSE
AC004471.10	0.360577	-0.0650538	0.0747498	-0.870288	0.384143	1	FALSE
AC004471.9	1.06402	-0.0271385	0.127407	-0.213006	0.831323	1	FALSE
AC004485.3	0.392573	-0.0219514	0.0747468	-0.293677	0.769005	1	FALSE
AC004490.1	1.10282	-0.114736	0.131684	-0.871297	0.383592	1	FALSE
AC004538.3	120.937	-0.299528	0.2935	-1.02054	0.307473	1	FALSE
AC004540.5	4.83487	-0.170448	0.233967	-0.728513	0.4663	1	FALSE
AC004543.2	3.04231	-0.16677	0.177683	-0.93858	0.347947	1	FALSE
AC004549.6	1.07282	0.00869828	0.120618	0.0721141	0.942511	1	FALSE
AC004556.1	2.09656	-0.0400639	0.170787	-0.234583	0.814532	1	FALSE
AC004754.3	2.42696	-0.0142187	0.17197	-0.082681	0.934105	1	FALSE
AC004854.4	0.910282	-0.0284747	0.122665	-0.232134	0.816434	1	FALSE
AC004893.11	45.7826	0.141045	0.301539	0.46775	0.639963	1	FALSE
AC004920.2	0.747496	0.0374647	0.0959372	0.390512	0.696158	1	FALSE
AC004938.5	0.292465	0	0.0747468	0	1	1	FALSE
AC004941.5	0.418964	0.0427812	0.0747468	0.572348	0.567086	1	FALSE
AC004951.5	9.89702	0.125678	0.279956	0.448919	0.65349	1	FALSE
AC004951.6	5.78283	-0.162363	0.242525	-0.669469	0.503197	1	FALSE
AC004967.7	54.2954	-0.251335	0.300667	-0.835925	0.403197	1	FALSE
AC004980.10	0.355487	0.0212037	0.0747468	0.283673	0.776661	1	FALSE
AC004980.7	25.949	-0.100161	0.307358	-0.325877	0.744517	1	FALSE
AC004985.12	1.08032	-0.0738776	0.136178	-0.542507	0.58747	1	FALSE
AC004987.9	58.3317	0.0852316	0.294696	0.289218	0.772414	1	FALSE
AC005009.1	3.20731	-0.0334225	0.19149	-0.17454	0.861441	1	FALSE
AC005009.2	9.06205	-0.00409883	0.27292	-0.0150184	0.988017	1	FALSE
AC005013.5	1.37979	-0.00153011	0.15649	-0.00977765	0.992199	1	FALSE
AC005014.5	3.45604	-0.122776	0.205091	-0.59864	0.549413	1	FALSE
AC005017.2	1.352	-0.0302409	0.125655	-0.240665	0.809815	1	FALSE
AC005019.2	7.64716	0.0818339	0.214498	0.381514	0.702822	1	FALSE
AC005037.3	4.76191	0.0180202	0.21193	0.0850289	0.932238	1	FALSE
AC005042.2	1.12599	-0.0391281	0.134482	-0.290953	0.771087	1	FALSE
AC005062.2	327.668	0.145372	0.274961	0.528701	0.597013	1	FALSE
AC005076.5	23.3797	0.104708	0.304717	0.343622	0.731131	1	FALSE
AC005077.14	29.3051	-0.300719	0.306078	-0.982489	0.325859	1	FALSE
AC005077.7	2.20636	-0.0653987	0.173261	-0.377456	0.705835	1	FALSE
AC005077.8	0.260469	-0.043529	0.0747468	-0.582352	0.560329	1	FALSE
AC005082.12	1.56526	-0.13876	0.142424	-0.974275	0.32992	1	FALSE
AC005083.1	2.6669	-0.0830892	0.172745	-0.480993	0.630521	1	FALSE
AC005102.1	1.19763	0.0537216	0.113312	0.474104	0.635426	1	FALSE
AC005150.1	0.306594	-0.0219514	0.0747468	-0.293677	0.769005	1	FALSE
AC005154.6	305.991	-0.431541	0.302703	-1.42563	0.153977	1	FALSE
AC005154.7	2.56803	-0.0788609	0.183806	-0.429045	0.66789	1	FALSE
AC005189.6	0.260469	-0.043529	0.0747468	-0.582352	0.560329	1	FALSE
AC005220.3	3.30197	-0.153518	0.214849	-0.714542	0.474892	1	FALSE
AC005224.2	14.0098	-0.180092	0.297153	-0.606058	0.544476	1	FALSE
AC005229.5	0.362785	-0.0219514	0.0747468	-0.293677	0.769005	1	FALSE
AC005251.3	2.75705	0.0921866	0.197119	0.467669	0.640021	1	FALSE
AC005253.2	2.28268	-0.136205	0.176949	-0.769739	0.441455	1	FALSE
AC005253.4	1.10068	-0.0520925	0.110923	-0.469629	0.63862	1	FALSE
AC005255.3	1.95073	0.0666339	0.170047	0.391855	0.695165	1	FALSE
AC005256.1	1.38404	-0.0223967	0.131573	-0.170222	0.864835	1	FALSE
AC005262.2	0.399093	-0.000519086	0.0752186	-0.00690104	0.994494	1	FALSE
AC005262.4	10.3564	-0.00502574	0.250645	-0.0200512	0.984003	1	FALSE
AC005276.1	37.2207	-0.250981	0.307754	-0.815524	0.414773	1	FALSE
AC005300.5	0.260469	-0.043529	0.0747468	-0.582352	0.560329	1	FALSE
AC005301.9	0.783813	0.0287378	0.0985439	0.291624	0.770574	1	FALSE
AC005306.3	37.0735	-0.185801	0.307852	-0.60354	0.546149	1	FALSE
AC005307.1	5.52666	-0.0375078	0.232758	-0.161145	0.871979	1	FALSE
AC005307.3	6.84664	-0.0372758	0.220303	-0.169202	0.865638	1	FALSE
AC005307.4	0.401231	-0.0219514	0.0747468	-0.293677	0.769005	1	FALSE
AC005307.5	16.6505	0.022521	0.297547	0.0756888	0.939667	1	FALSE
AC005324.6	0.262677	0	0.0747468	0	1	1	FALSE
AC005329.7	62.4227	-0.222267	0.307827	-0.722051	0.470263	1	FALSE
AC005336.5	0.259801	-0.000373885	0.0747468	-0.00500202	0.996009	1	FALSE
AC005339.2	1.14943	-0.00316245	0.120148	-0.0263212	0.979001	1	FALSE
AC005355.1	1.15389	-0.0182843	0.139808	-0.130782	0.895948	1	FALSE
AC005355.2	0.81382	0.0292938	0.0998714	0.293315	0.769281	1	FALSE
AC005355.3	0.307296	-0.043529	0.0747468	-0.582352	0.560329	1	FALSE
AC005363.11	1.95374	0.181221	0.166854	1.08611	0.277432	1	FALSE
AC005394.1	0.717568	-0.00116389	0.112659	-0.010331	0.991757	1	FALSE
AC005477.1	0.664613	-0.0219458	0.0918291	-0.238985	0.811117	1	FALSE
AC005480.1	1.07271	-0.00146932	0.138668	-0.0105959	0.991546	1	FALSE
AC005481.5	5.86513	-0.00288706	0.21674	-0.0133204	0.989372	1	FALSE
AC005498.3	1.84997	-0.0762786	0.161379	-0.472668	0.63645	1	FALSE
AC005517.3	5.81194	0.115594	0.208518	0.554359	0.579333	1	FALSE
AC005519.4	116.627	-0.360367	0.30062	-1.19875	0.230627	1	FALSE
AC005522.6	0.462188	-0.0482112	0.0821771	-0.586674	0.557422	1	FALSE
AC005523.2	2.78209	-0.259923	0.167653	-1.55036	0.121055	1	FALSE
AC005523.3	0.707572	0.0949816	0.0964908	0.98436	0.324939	1	FALSE
AC005532.5	1.16619	-0.0144165	0.128383	-0.112293	0.910591	1	FALSE
AC005534.6	0.658471	0.0216475	0.0931147	0.232482	0.816163	1	FALSE
AC005534.8	2.5129	0.0620997	0.189133	0.328338	0.742656	1	FALSE
AC005537.2	1.21602	0.0823603	0.126086	0.653206	0.513624	1	FALSE
AC005539.2	0.198878	0.0427812	0.0747468	0.572348	0.567086	1	FALSE
AC005540.3	2.26057	-0.0887592	0.165697	-0.53567	0.592186	1	FALSE
AC005546.2	2.52613	-0.200591	0.151714	-1.32217	0.186113	1	FALSE
AC005562.1	24.1401	-0.0931329	0.304913	-0.305441	0.76003	1	FALSE
AC005578.3	3.48037	0.0282373	0.18804	0.150166	0.880633	1	FALSE
AC005592.1	13.2295	0.0619731	0.286959	0.215965	0.829015	1	FALSE
AC005592.2	37.4668	-0.0101164	0.306554	-0.0330004	0.973674	1	FALSE
AC005592.3	1.23802	0.0514858	0.125763	0.409388	0.682255	1	FALSE
AC005593.2	1.21572	-0.0629869	0.128096	-0.491716	0.62292	1	FALSE
AC005606.14	3.4013	-0.0882602	0.208774	-0.422756	0.672474	1	FALSE
AC005606.15	0.300322	-0.0650319	0.0747493	-0.87	0.3843	1	FALSE
AC005609.16	15.1603	-0.0477773	0.299647	-0.159445	0.873318	1	FALSE
AC005609.18	9.4054	-0.0721582	0.273324	-0.264002	0.791778	1	FALSE
AC005609.19	0.805049	0.0602759	0.109563	0.550147	0.582219	1	FALSE
AC005609.20	3.51872	0.0213881	0.210369	0.10167	0.919019	1	FALSE
AC005616.1	0.354437	-0.000373885	0.0747468	-0.00500202	0.996009	1	FALSE
AC005618.6	15.9076	0.238213	0.295817	0.805272	0.420663	1	FALSE
AC005624.2	4.0576	-0.0396863	0.225534	-0.175966	0.86032	1	FALSE
AC005682.5	271.685	-0.290581	0.279253	-1.04056	0.298078	1	FALSE
AC005682.6	0.725592	0.0591889	0.0964853	0.61345	0.539579	1	FALSE
AC005740.3	0.25538	0.0427812	0.0747468	0.572348	0.567086	1	FALSE
AC005740.4	3.1468	-0.0989588	0.163966	-0.603534	0.546153	1	FALSE
AC005740.6	2.08871	-0.00490833	0.165599	-0.0296399	0.976354	1	FALSE
AC005753.1	2.332	-0.118091	0.156706	-0.753584	0.451099	1	FALSE
AC005754.8	8.44512	-0.305027	0.265911	-1.1471	0.251339	1	FALSE
AC005775.2	3.16632	-0.156917	0.202743	-0.77397	0.438948	1	FALSE
AC005776.1	2.48939	-0.173166	0.164171	-1.05479	0.291519	1	FALSE
AC005780.1	10.7202	0.00145927	0.278545	0.00523891	0.99582	1	FALSE
AC005785.2	3.93128	-0.204937	0.216623	-0.946056	0.34412	1	FALSE
AC005785.5	5.9292	-0.168508	0.232719	-0.724084	0.469014	1	FALSE
AC005786.3	0.511047	-0.0232412	0.0847403	-0.274263	0.783882	1	FALSE
AC005786.6	0.516518	-0.0372209	0.0769395	-0.483768	0.62855	1	FALSE
AC005786.7	7.85987	-0.27233	0.256178	-1.06305	0.28776	1	FALSE
AC005795.1	6.7572	0.0541589	0.258981	0.209123	0.834352	1	FALSE
AC005822.1	3.12951	0.063434	0.199924	0.317291	0.751023	1	FALSE
AC005915.1	0.250578	0.0212037	0.0747468	0.283673	0.776661	1	FALSE
AC005932.1	0.561626	-0.035066	0.096235	-0.364379	0.715575	1	FALSE
AC005943.6	1.89323	-0.0976321	0.122	-0.800265	0.423557	1	FALSE
AC005944.2	10.2359	-0.445933	0.22965	-1.94179	0.0521621	1	FALSE
AC005954.3	1.51778	-0.00147337	0.131405	-0.0112124	0.991054	1	FALSE
AC005954.4	0.399093	-0.000519086	0.0752186	-0.00690104	0.994494	1	FALSE
AC006000.5	5.0593	-0.063806	0.228241	-0.279556	0.779818	1	FALSE
AC006026.13	5.53347	-0.0763532	0.20488	-0.372673	0.709392	1	FALSE
AC006026.9	1.38729	0.00152508	0.139132	0.0109613	0.991254	1	FALSE
AC006028.11	0.396465	0	0.0747468	0	1	1	FALSE
AC006042.7	0.800143	0.0429485	0.101388	0.423603	0.671855	1	FALSE
AC006042.8	1.80756	-0.0795073	0.125831	-0.63186	0.527479	1	FALSE
AC006077.3	11.8384	-0.156253	0.26298	-0.594163	0.552403	1	FALSE
AC006116.12	0.240869	0	0.0747468	0	1	1	FALSE
AC006116.13	0.254999	-0.0219514	0.0747468	-0.293677	0.769005	1	FALSE
AC006116.14	0.445886	-0.0186505	0.0752842	-0.247735	0.80434	1	FALSE
AC006116.15	1.5783	-0.0885352	0.1353	-0.654363	0.512878	1	FALSE
AC006116.17	2.42603	0.0222494	0.182118	0.122171	0.902764	1	FALSE
AC006116.21	0.402281	-0.000373885	0.0747468	-0.00500202	0.996009	1	FALSE
AC006116.22	1.43061	0.0844021	0.148024	0.570193	0.568547	1	FALSE
AC006116.24	2.23834	-0.165981	0.168126	-0.987244	0.323523	1	FALSE
AC006116.27	2.86953	-0.00226506	0.18447	-0.0122788	0.990203	1	FALSE
AC006128.2	5.79118	-0.152103	0.24645	-0.617176	0.537119	1	FALSE
AC006129.2	0.925244	0.00983934	0.115282	0.0853502	0.931983	1	FALSE
AC006160.5	1.39832	0.107996	0.151653	0.712128	0.476385	1	FALSE
AC006195.2	0.35924	0.0212037	0.0747468	0.283673	0.776661	1	FALSE
AC006262.10	0.673653	0.0517494	0.0923654	0.560268	0.575296	1	FALSE
AC006262.11	1.64477	0.0293622	0.148041	0.198338	0.842781	1	FALSE
AC006262.5	3.2917	-0.0888092	0.188867	-0.47022	0.638198	1	FALSE
AC006262.6	5.53956	-0.122711	0.240304	-0.510648	0.609598	1	FALSE
AC006272.2	0.471899	-0.000373885	0.0747468	-0.00500202	0.996009	1	FALSE
AC006273.4	12.5617	-0.0712166	0.285874	-0.249119	0.803269	1	FALSE
AC006273.5	91.9629	-0.299046	0.307885	-0.97129	0.331404	1	FALSE
AC006277.2	2.97348	-0.228579	0.187765	-1.21737	0.223465	1	FALSE
AC006355.3	0.240869	0	0.0747468	0	1	1	FALSE
AC006369.2	1.21193	-0.0891058	0.137011	-0.650355	0.515463	1	FALSE
AC006369.3	0.194076	0.0212037	0.0747468	0.283673	0.776661	1	FALSE
AC006372.4	1.01978	0.103477	0.128453	0.805563	0.420495	1	FALSE
AC006372.6	1.20392	-0.0730766	0.113637	-0.643072	0.520178	1	FALSE
AC006445.6	0.340977	-0.0219514	0.0747468	-0.293677	0.769005	1	FALSE
AC006445.7	0.302174	0.0212037	0.0747468	0.283673	0.776661	1	FALSE
AC006449.2	0.194076	0.0212037	0.0747468	0.283673	0.776661	1	FALSE
AC006486.10	0.975302	-0.0789213	0.126116	-0.625783	0.531457	1	FALSE
AC006509.4	0.705791	-0.04262	0.095745	-0.445141	0.656218	1	FALSE
AC006509.7	1.21698	-0.0443398	0.126985	-0.349174	0.726959	1	FALSE
AC006538.1	14.6792	-0.3579	0.281064	-1.27338	0.202885	1	FALSE
AC006538.8	0.398424	0.0365561	0.0752063	0.486078	0.626912	1	FALSE
AC006539.2	0.359908	-0.0219514	0.0747468	-0.293677	0.769005	1	FALSE
AC006547.13	0.200215	-0.043529	0.0747468	-0.582352	0.560329	1	FALSE
AC006547.15	0.40043	-0.075198	0.0751835	-1.00019	0.317217	1	FALSE
AC006547.8	2.19068	-0.228392	0.169774	-1.34527	0.178538	1	FALSE
AC006548.28	3.46738	-0.0590877	0.21083	-0.280262	0.779277	1	FALSE
AC006942.4	0.707224	0.0393496	0.0948758	0.414748	0.678326	1	FALSE
AC006946.15	3.97537	0.173908	0.212144	0.819763	0.412352	1	FALSE
AC006946.16	0.354437	-0.000373885	0.0747468	-0.00500202	0.996009	1	FALSE
AC006978.6	79.7006	-0.018342	0.305779	-0.0599846	0.952168	1	FALSE
AC006994.2	2.1598	-0.104221	0.17447	-0.59736	0.550267	1	FALSE
AC006994.3	0.301826	-0.0219514	0.0747468	-0.293677	0.769005	1	FALSE
AC007016.3	1.01137	-0.0903732	0.119681	-0.755119	0.450178	1	FALSE
AC007036.4	0.255703	-0.0219514	0.0747468	-0.293677	0.769005	1	FALSE
AC007038.7	6.79553	-0.0834396	0.231552	-0.360349	0.718586	1	FALSE
AC007041.2	12.9161	0.242107	0.291015	0.83194	0.405443	1	FALSE
AC007091.1	2.89204	0.088539	0.195956	0.451831	0.651391	1	FALSE
AC007106.1	7.83423	-0.0853257	0.267639	-0.318809	0.749872	1	FALSE
AC007128.1	15.0549	-0.126199	0.25282	-0.499167	0.617662	1	FALSE
AC007131.1	0.306594	-0.0219514	0.0747468	-0.293677	0.769005	1	FALSE
AC007163.6	0.645887	-0.0186891	0.0837242	-0.223222	0.823363	1	FALSE
AC007182.6	0.751845	0.0193582	0.0973081	0.198937	0.842312	1	FALSE
AC007191.4	127.696	-0.236478	0.307035	-0.770198	0.441183	1	FALSE
AC007192.4	0.25538	0.0427812	0.0747468	0.572348	0.567086	1	FALSE
AC007193.6	0.469866	-0.0185897	0.0753107	-0.24684	0.805032	1	FALSE
AC007193.8	0.553636	-0.0513318	0.0785355	-0.653612	0.513362	1	FALSE
AC007204.2	1.44649	0.0357203	0.146749	0.243411	0.807687	1	FALSE
AC007228.11	16.9366	0.195175	0.298256	0.654388	0.512862	1	FALSE
AC007228.9	34.7624	-0.445897	0.306847	-1.45316	0.14618	1	FALSE
AC007229.3	4.37073	0.0809935	0.223005	0.363191	0.716462	1	FALSE
AC007237.2	0.454545	-0.0257925	0.081721	-0.315616	0.752294	1	FALSE
AC007238.1	51.7127	0.0752563	0.300484	0.250451	0.802239	1	FALSE
AC007246.3	25.7725	0.0738307	0.307779	0.239883	0.810421	1	FALSE
AC007249.3	8.7842	-0.228916	0.266536	-0.858854	0.390421	1	FALSE
AC007250.4	0.423039	-0.0219514	0.0747468	-0.293677	0.769005	1	FALSE
AC007255.8	8.12898	0.00535521	0.264868	0.0202184	0.983869	1	FALSE
AC007256.5	2.42284	-0.0588859	0.178087	-0.330658	0.740903	1	FALSE
AC007272.3	0.392953	0.056136	0.0751671	0.746816	0.455175	1	FALSE
AC007277.3	5.54313	-0.0136544	0.242005	-0.056422	0.955006	1	FALSE
AC007278.3	0.675161	-0.0584995	0.0836966	-0.698947	0.484585	1	FALSE
AC007279.2	0.717222	-0.0418972	0.112422	-0.372677	0.709389	1	FALSE
AC007283.4	0.240869	0	0.0747468	0	1	1	FALSE
AC007285.6	1.39452	-0.0362365	0.137088	-0.264329	0.791526	1	FALSE
AC007292.3	2.09958	-0.13139	0.116378	-1.12899	0.258902	1	FALSE
AC007292.6	30.0297	0.174235	0.307241	0.567097	0.570648	1	FALSE
AC007292.7	17.265	0.261774	0.301971	0.866884	0.386006	1	FALSE
AC007318.5	61.8545	0.177233	0.30785	0.575714	0.564808	1	FALSE
AC007319.1	1.22474	-0.110287	0.133832	-0.82407	0.4099	1	FALSE
AC007325.2	91.2287	0.0704968	0.307169	0.229505	0.818476	1	FALSE
AC007325.4	7.37239	-0.126846	0.254767	-0.497889	0.618562	1	FALSE
AC007326.1	13.2832	-0.130358	0.29354	-0.44409	0.656977	1	FALSE
AC007362.3	0.640066	-0.00926275	0.0823962	-0.112417	0.910493	1	FALSE
AC007365.3	2.57787	-0.0249258	0.16141	-0.154426	0.877274	1	FALSE
AC007365.4	0.989956	0.0544279	0.115335	0.471912	0.636989	1	FALSE
AC007383.3	326.435	-0.154181	0.283676	-0.543511	0.586778	1	FALSE
AC007383.6	1.1257	0.0332602	0.12282	0.270804	0.786542	1	FALSE
AC007386.3	0.61746	0.0254845	0.0987828	0.257985	0.796418	1	FALSE
AC007389.1	0.250578	0.0212037	0.0747468	0.283673	0.776661	1	FALSE
AC007389.2	0.240869	0	0.0747468	0	1	1	FALSE
AC007390.4	0.263023	0.0212037	0.0747468	0.283673	0.776661	1	FALSE
AC007391.2	1.14361	0.0107384	0.11681	0.0919305	0.926753	1	FALSE
AC007403.2	0.256049	-0.000373885	0.0747468	-0.00500202	0.996009	1	FALSE
AC007405.4	13.2191	-0.162728	0.289825	-0.56147	0.574477	1	FALSE
AC007405.6	239.106	0.109506	0.291978	0.375048	0.707625	1	FALSE
AC007405.8	2.23953	0.123874	0.180672	0.685626	0.492949	1	FALSE
AC007563.5	0.599761	-0.0356232	0.0812819	-0.438267	0.661193	1	FALSE
AC007566.10	9.5843	-0.166763	0.265049	-0.629178	0.529233	1	FALSE
AC007568.1	0.620337	0.030203	0.090284	0.334533	0.737977	1	FALSE
AC007620.3	1.35316	-0.116895	0.119514	-0.978086	0.328032	1	FALSE
AC007679.1	0.3088	0	0.0747468	0	1	1	FALSE
AC007682.1	261.787	-0.145167	0.264241	-0.549372	0.58275	1	FALSE
AC007743.1	2.04884	-0.0614694	0.150826	-0.407552	0.683603	1	FALSE
AC007773.2	17.4372	-0.167957	0.294669	-0.569985	0.568688	1	FALSE
AC007790.4	1.97696	0.0701159	0.178305	0.393236	0.694145	1	FALSE
AC007879.1	0.883543	0.00768445	0.100986	0.0760944	0.939344	1	FALSE
AC007879.2	2.37542	-0.0541911	0.189795	-0.285525	0.775242	1	FALSE
AC007879.4	3.77324	-0.0631062	0.224345	-0.281291	0.778487	1	FALSE
AC007879.5	1.18876	-0.0110784	0.122395	-0.090514	0.927879	1	FALSE
AC007879.7	0.556192	0.0424199	0.0874235	0.485223	0.627518	1	FALSE
AC007880.1	0.778872	0.0336469	0.10821	0.31094	0.755846	1	FALSE
AC007950.2	2.32589	-0.0386502	0.18791	-0.205685	0.837037	1	FALSE
AC007952.5	8.08747	-0.0313497	0.258814	-0.121128	0.903589	1	FALSE
AC007966.1	0.250232	0	0.0747468	0	1	1	FALSE
AC007969.4	0.815158	-0.0499039	0.101427	-0.492017	0.622707	1	FALSE
AC007969.5	279.277	0.00933815	0.188793	0.0494623	0.960551	1	FALSE
AC008060.7	1.7764	0.0457571	0.155316	0.294607	0.768294	1	FALSE
AC008065.1	2.43274	0.0605619	0.15938	0.379985	0.703956	1	FALSE
AC008074.1	0.408239	0.0184676	0.0752086	0.245552	0.806029	1	FALSE
AC008074.3	1.67197	0.126507	0.15701	0.805727	0.4204	1	FALSE
AC008074.5	0.250578	0.0212037	0.0747468	0.283673	0.776661	1	FALSE
AC008079.10	0.976188	-0.121599	0.110524	-1.10021	0.271239	1	FALSE
AC008088.4	19.629	0.0395738	0.305837	0.129395	0.897045	1	FALSE
AC008155.1	6.01039	0.139864	0.224792	0.622193	0.533815	1	FALSE
AC008269.2	1.395	0.0328603	0.141119	0.232855	0.815874	1	FALSE
AC008271.1	0.200215	-0.043529	0.0747468	-0.582352	0.560329	1	FALSE
AC008277.1	0.199546	-0.000373885	0.0747468	-0.00500202	0.996009	1	FALSE
AC008280.1	0.430143	0	0.0751427	0	1	1	FALSE
AC008427.2	1.18483	-0.000497123	0.134422	-0.00369822	0.997049	1	FALSE
AC008440.10	0.201718	0	0.0747468	0	1	1	FALSE
AC008440.5	1.34685	-0.142234	0.109793	-1.29547	0.195158	1	FALSE
AC008522.1	4.56344	0.00174005	0.223031	0.00780186	0.993775	1	FALSE
AC008592.3	2.12959	0.0265182	0.156583	0.169356	0.865517	1	FALSE
AC008592.8	0.751952	0.0400926	0.113919	0.351941	0.724883	1	FALSE
AC008694.2	0.396465	0	0.0747468	0	1	1	FALSE
AC008697.1	3.28644	0.0933298	0.204519	0.456337	0.648147	1	FALSE
AC008746.12	8.33962	-0.190569	0.251034	-0.759136	0.447771	1	FALSE
AC008746.3	2.64733	-0.202389	0.165515	-1.22278	0.221411	1	FALSE
AC008753.3	10.8852	0.0973094	0.280018	0.347512	0.728207	1	FALSE
AC008753.4	7.66655	0.185542	0.252868	0.733752	0.4631	1	FALSE
AC008753.6	1.41755	-0.0420422	0.151307	-0.277861	0.781119	1	FALSE
AC008759.1	0.548166	-0.043083	0.087086	-0.494718	0.620799	1	FALSE
AC008781.7	0.857182	-0.0692974	0.110929	-0.624703	0.532166	1	FALSE
AC008834.1	33.6964	-0.110314	0.307633	-0.35859	0.719902	1	FALSE
AC008850.3	0.854232	0.0108671	0.119733	0.0907613	0.927682	1	FALSE
AC008982.2	17.9039	-0.169607	0.303354	-0.559108	0.576088	1	FALSE
AC008992.1	0.452296	0.0214016	0.0752396	0.284446	0.776068	1	FALSE
AC009005.2	150.518	-0.00176819	0.282089	-0.00626822	0.994999	1	FALSE
AC009065.1	3.83501	-0.276576	0.161222	-1.7155	0.0862545	1	FALSE
AC009120.11	2.23729	-0.0774157	0.184611	-0.419345	0.674964	1	FALSE
AC009120.3	21.2873	-0.33076	0.300772	-1.0997	0.271461	1	FALSE
AC009120.4	1.72575	0.105431	0.153531	0.686704	0.49227	1	FALSE
AC009120.5	1.92463	-0.0400145	0.175294	-0.228271	0.819436	1	FALSE
AC009120.6	101.583	-0.276492	0.293787	-0.94113	0.346638	1	FALSE
AC009120.8	1.37006	-0.125318	0.135085	-0.927697	0.353565	1	FALSE
AC009133.12	18.6203	-0.453711	0.284846	-1.59283	0.111198	1	FALSE
AC009133.15	10.1018	-0.332384	0.230068	-1.44472	0.148537	1	FALSE
AC009133.17	66.8072	-0.544427	0.307697	-1.76936	0.0768339	1	FALSE
AC009133.21	7.17124	-0.147919	0.259988	-0.568944	0.569394	1	FALSE
AC009166.7	0.566429	-0.00814383	0.0880355	-0.0925063	0.926296	1	FALSE
AC009229.6	0.201718	0	0.0747468	0	1	1	FALSE
AC009245.3	6.64586	0.0170115	0.238422	0.0713503	0.943119	1	FALSE
AC009262.2	2.00643	0.102963	0.152218	0.676413	0.498778	1	FALSE
AC009264.1	2.48654	-0.029461	0.191728	-0.15366	0.877878	1	FALSE
AC009274.6	1.1289	0.0303216	0.120645	0.251329	0.80156	1	FALSE
AC009299.2	3.96675	-0.00887032	0.225027	-0.0394189	0.968556	1	FALSE
AC009299.3	118.613	0.134638	0.276718	0.486551	0.626576	1	FALSE
AC009299.5	0.761521	0.0237137	0.107562	0.220467	0.825508	1	FALSE
AC009303.2	20.6616	-0.101966	0.305834	-0.333402	0.738831	1	FALSE
AC009312.1	6.76233	0.0459133	0.246086	0.186574	0.851995	1	FALSE
AC009362.2	3.36468	-0.0875827	0.201078	-0.435567	0.663151	1	FALSE
AC009403.2	55.2362	-0.321178	0.301695	-1.06458	0.287067	1	FALSE
AC009404.2	59.2302	-0.0150001	0.306537	-0.0489339	0.960972	1	FALSE
AC009411.2	0.302174	0.0212037	0.0747468	0.283673	0.776661	1	FALSE
AC009413.2	2.26718	-0.0651467	0.17999	-0.361946	0.717392	1	FALSE
AC009414.1	0.20652	0.0212037	0.0747468	0.283673	0.776661	1	FALSE
AC009473.1	6.46625	-0.0578599	0.251875	-0.229717	0.818312	1	FALSE
AC009487.4	0.299654	-0.0219514	0.0747468	-0.293677	0.769005	1	FALSE
AC009487.6	10.8456	0.134365	0.284294	0.472625	0.63648	1	FALSE
AC009495.2	1.10569	0.010642	0.119946	0.0887239	0.929301	1	FALSE
AC009495.3	0.357659	0.0212037	0.0747468	0.283673	0.776661	1	FALSE
AC009501.4	12.3049	0.0998951	0.28383	0.351954	0.724873	1	FALSE
AC009502.4	0.194076	0.0212037	0.0747468	0.283673	0.776661	1	FALSE
AC009505.2	0.755917	-0.041091	0.0884434	-0.464602	0.642216	1	FALSE
AC009506.1	42.5129	0.040675	0.307342	0.132344	0.894712	1	FALSE
AC009517.2	0.876245	-0.00119507	0.121344	-0.0098486	0.992142	1	FALSE
AC009518.4	0.805266	0.0336096	0.109873	0.305896	0.759684	1	FALSE
AC009531.2	0.194744	-0.0219514	0.0747468	-0.293677	0.769005	1	FALSE
AC009784.3	0.198878	0.0427812	0.0747468	0.572348	0.567086	1	FALSE
AC009945.4	0.260469	-0.043529	0.0747468	-0.582352	0.560329	1	FALSE
AC009948.5	218.887	-0.212243	0.293532	-0.723065	0.46964	1	FALSE
AC009948.7	7.03089	-0.0191994	0.257706	-0.0745011	0.940612	1	FALSE
AC009950.2	0.668675	-0.0624809	0.0921946	-0.677707	0.497958	1	FALSE
AC009955.8	3.12451	-0.212919	0.181266	-1.17462	0.240146	1	FALSE
AC009961.2	1.90879	-0.140378	0.149625	-0.9382	0.348142	1	FALSE
AC009961.3	11.8178	-0.0814287	0.289222	-0.281544	0.778293	1	FALSE
AC009963.5	0.513115	-0.0052054	0.0849002	-0.061312	0.951111	1	FALSE
AC010091.1	0.311537	0.0212037	0.0747468	0.283673	0.776661	1	FALSE
AC010095.6	0.439747	0.0366641	0.0752406	0.487291	0.626052	1	FALSE
AC010132.11	0.245671	0.0212037	0.0747468	0.283673	0.776661	1	FALSE
AC010136.2	1.00475	-0.07692	0.107713	-0.714119	0.475154	1	FALSE
AC010148.1	1.35697	0.0667633	0.150026	0.445012	0.656311	1	FALSE
AC010150.1	1.85421	-0.0606665	0.143325	-0.42328	0.672091	1	FALSE
AC010226.4	0.691316	-0.0433786	0.0948694	-0.457245	0.647495	1	FALSE
AC010240.2	26.0627	0.0874445	0.262067	0.333672	0.738627	1	FALSE
AC010240.3	0.462536	-0.000373885	0.0747468	-0.00500202	0.996009	1	FALSE
AC010468.1	5.87869	-0.0538859	0.240873	-0.223711	0.822982	1	FALSE
AC010492.2	3.27882	0.197915	0.202628	0.976738	0.328699	1	FALSE
AC010504.2	2.16357	-0.0279476	0.174171	-0.160461	0.872518	1	FALSE
AC010524.2	0.420831	-0.0650852	0.0747504	-0.8707	0.383918	1	FALSE
AC010547.9	0.296355	0	0.0747468	0	1	1	FALSE
AC010642.1	7.67613	0.0650327	0.261751	0.248452	0.803784	1	FALSE
AC010677.5	1.5146	0.00929622	0.148355	0.0626622	0.950036	1	FALSE
AC010729.1	5.21899	-0.111631	0.242138	-0.461022	0.644783	1	FALSE
AC010729.2	13.3596	0.0578123	0.283513	0.203915	0.83842	1	FALSE
AC010731.4	0.36208	-0.0219514	0.0747468	-0.293677	0.769005	1	FALSE
AC010733.5	1.93896	0.043618	0.157692	0.276602	0.782086	1	FALSE
AC010761.10	1.00738	-0.10627	0.0988131	-1.07546	0.282167	1	FALSE
AC010761.14	0.467133	0.0212037	0.0747468	0.283673	0.776661	1	FALSE
AC010761.6	1.17207	0.0870643	0.124689	0.698255	0.485018	1	FALSE
AC010761.8	2.98623	-0.221075	0.180456	-1.22509	0.220541	1	FALSE
AC010761.9	1.30006	-0.104386	0.0982649	-1.06229	0.288104	1	FALSE
AC010878.3	2.60743	-0.0272284	0.183696	-0.148225	0.882165	1	FALSE
AC010883.5	4.40872	-0.0963974	0.231865	-0.415749	0.677594	1	FALSE
AC010884.1	5.08271	-0.0278244	0.237314	-0.117247	0.906664	1	FALSE
AC010890.1	2.44401	0.19692	0.182031	1.08179	0.279346	1	FALSE
AC010894.3	13.4547	-0.0276732	0.28971	-0.0955201	0.923902	1	FALSE
AC010894.4	0.194744	-0.0219514	0.0747468	-0.293677	0.769005	1	FALSE
AC010900.2	5.22553	0.0836929	0.228978	0.365506	0.714733	1	FALSE
AC010967.2	0.814489	-0.00964872	0.100793	-0.0957276	0.923737	1	FALSE
AC010976.2	0.200215	-0.043529	0.0747468	-0.582352	0.560329	1	FALSE
AC010983.1	0.411644	-0.000373885	0.0747468	-0.00500202	0.996009	1	FALSE
AC011043.1	29.7431	0.10281	0.307653	0.334176	0.738247	1	FALSE
AC011286.1	1.79414	0.0106781	0.151982	0.0702591	0.943987	1	FALSE
AC011290.4	1.10197	0.0623339	0.123045	0.506594	0.61244	1	FALSE
AC011290.5	1.67099	0.0487123	0.131414	0.370677	0.710878	1	FALSE
AC011298.2	2.09379	-0.0714793	0.179449	-0.398327	0.690389	1	FALSE
AC011330.13	0.622931	-0.000689298	0.0994413	-0.00693171	0.994469	1	FALSE
AC011380.8	1.0291	0.0400469	0.134813	0.297055	0.766424	1	FALSE
AC011551.3	1.15879	-0.00351046	0.122404	-0.0286793	0.97712	1	FALSE
AC011558.5	1.91136	-0.219066	0.151708	-1.444	0.148739	1	FALSE
AC011747.3	0.401933	-0.0379384	0.0752035	-0.504477	0.613926	1	FALSE
AC011747.4	2.16129	-0.0134246	0.182059	-0.0737375	0.941219	1	FALSE
AC011753.6	0.263023	0.0212037	0.0747468	0.283673	0.776661	1	FALSE
AC011841.1	0.189273	0	0.0747468	0	1	1	FALSE
AC011933.2	0.455213	-0.058828	0.0752532	-0.781734	0.434371	1	FALSE
AC011997.1	0.263023	0.0212037	0.0747468	0.283673	0.776661	1	FALSE
AC011998.4	1.05322	0.0585771	0.11114	0.527055	0.598155	1	FALSE
AC011999.1	0.612313	-0.031459	0.0907267	-0.346745	0.728783	1	FALSE
AC012065.5	0.393622	0.0182638	0.0751903	0.242901	0.808082	1	FALSE
AC012066.1	2.14373	0.0345862	0.181034	0.191048	0.848488	1	FALSE
AC012074.2	2.3743	0.0244912	0.174019	0.140739	0.888077	1	FALSE
AC012123.1	0.613365	0.0241252	0.0804155	0.300006	0.764172	1	FALSE
AC012146.7	141.736	0.0166597	0.285952	0.0582606	0.953541	1	FALSE
AC012314.20	0.200215	-0.043529	0.0747468	-0.582352	0.560329	1	FALSE
AC012314.8	20.3132	-0.590542	0.304105	-1.9419	0.0521491	1	FALSE
AC012354.6	12.0251	0.261672	0.278346	0.940095	0.347169	1	FALSE
AC012354.8	10.0106	0.0375911	0.269733	0.139364	0.889162	1	FALSE
AC012358.4	4.99353	0.0024378	0.230426	0.0105795	0.991559	1	FALSE
AC012358.7	1.88894	0.0846632	0.166286	0.509142	0.610653	1	FALSE
AC012358.8	1.44839	-0.058083	0.150916	-0.384869	0.700335	1	FALSE
AC012360.4	1.13755	0.0688784	0.120239	0.572847	0.566748	1	FALSE
AC012360.6	0.369759	0	0.0747468	0	1	1	FALSE
AC012363.4	3.94508	-0.00374819	0.22596	-0.0165878	0.986765	1	FALSE
AC012368.1	8.16244	-0.0932231	0.267936	-0.347931	0.727892	1	FALSE
AC012370.2	0.207189	-0.0219514	0.0747468	-0.293677	0.769005	1	FALSE
AC012442.5	2.05245	0.119324	0.172787	0.690586	0.489826	1	FALSE
AC012442.6	3.2904	0.0374879	0.208881	0.17947	0.857569	1	FALSE
AC012456.4	0.199546	-0.000373885	0.0747468	-0.00500202	0.996009	1	FALSE
AC012462.1	0.867203	-0.0315155	0.102945	-0.306139	0.759499	1	FALSE
AC012462.2	1.93507	0.0239165	0.164286	0.145579	0.884254	1	FALSE
AC012485.2	1.00818	-0.118422	0.128113	-0.924352	0.355303	1	FALSE
AC012493.1	0.647388	0.0492542	0.0822438	0.598881	0.549252	1	FALSE
AC012499.1	0.240869	0	0.0747468	0	1	1	FALSE
AC012501.2	1.81519	0.0473625	0.162318	0.291788	0.770449	1	FALSE
AC012501.3	30.4148	0.309724	0.307622	1.00684	0.314014	1	FALSE
AC012506.4	0.267443	-0.0219514	0.0747468	-0.293677	0.769005	1	FALSE
AC012512.1	0.263023	0.0212037	0.0747468	0.283673	0.776661	1	FALSE
AC012668.1	0.311537	0.0212037	0.0747468	0.283673	0.776661	1	FALSE
AC012668.2	16.1521	-0.183667	0.297547	-0.617272	0.537055	1	FALSE
AC013267.1	0.194076	0.0212037	0.0747468	0.283673	0.776661	1	FALSE
AC013268.3	0.80628	0.0168253	0.100405	0.167575	0.866918	1	FALSE
AC013275.2	0.345779	-0.000373885	0.0747468	-0.00500202	0.996009	1	FALSE
AC013404.1	1.09242	-0.0907285	0.120356	-0.753832	0.45095	1	FALSE
AC013429.5	0.240869	0	0.0747468	0	1	1	FALSE
AC013436.6	0.307296	-0.043529	0.0747468	-0.582352	0.560329	1	FALSE
AC013460.1	2.75465	-0.0559235	0.170046	-0.328872	0.742252	1	FALSE
AC013461.1	1649.91	-0.0561552	0.274199	-0.204797	0.83773	1	FALSE
AC013470.6	3.57774	0.00738547	0.199574	0.0370061	0.97048	1	FALSE
AC013472.3	0.606065	0.0602673	0.090518	0.665805	0.505536	1	FALSE
AC013474.4	0.510415	0.058505	0.0765567	0.764205	0.444745	1	FALSE
AC013480.2	0.320724	-0.043529	0.0747468	-0.582352	0.560329	1	FALSE
AC015849.12	0.207189	-0.0219514	0.0747468	-0.293677	0.769005	1	FALSE
AC015849.14	0.369759	0	0.0747468	0	1	1	FALSE
AC015849.16	16.9149	-0.130395	0.280352	-0.465113	0.641851	1	FALSE
AC015849.2	2.02685	-0.078737	0.15377	-0.512045	0.60862	1	FALSE
AC015922.7	0.320724	-0.043529	0.0747468	-0.582352	0.560329	1	FALSE
AC015933.2	3.33988	0.027564	0.197098	0.139849	0.888779	1	FALSE
AC015971.2	0.357659	0.0212037	0.0747468	0.283673	0.776661	1	FALSE
AC015977.5	0.595343	0.0424935	0.0892633	0.476047	0.634041	1	FALSE
AC016292.3	0.802636	0.0100129	0.109584	0.0913715	0.927197	1	FALSE
AC016549.1	0.500537	-0.0824976	0.0755617	-1.09179	0.274925	1	FALSE
AC016582.2	3.9466	0.0470674	0.198966	0.23656	0.812998	1	FALSE
AC016700.4	0.662569	0.0264686	0.0849992	0.311398	0.755498	1	FALSE
AC016700.5	23.507	-0.170679	0.291698	-0.585123	0.558465	1	FALSE
AC016700.6	2.12642	-0.0572758	0.171263	-0.334432	0.738054	1	FALSE
AC016712.2	16.7355	0.00769746	0.256918	0.0299608	0.976098	1	FALSE
AC016716.1	1.84115	-0.0782439	0.152746	-0.512248	0.608478	1	FALSE
AC016722.3	0.198878	0.0427812	0.0747468	0.572348	0.567086	1	FALSE
AC016722.4	0.560792	-0.08493	0.0756794	-1.12223	0.261763	1	FALSE
AC016723.4	3.28453	0.0514287	0.180105	0.285548	0.775224	1	FALSE
AC016730.1	0.214163	0	0.0747468	0	1	1	FALSE
AC016734.2	1.61979	-0.101467	0.145486	-0.697432	0.485532	1	FALSE
AC016735.1	3.12948	0.104457	0.202454	0.515955	0.605886	1	FALSE
AC016738.4	0.301826	-0.0219514	0.0747468	-0.293677	0.769005	1	FALSE
AC016739.2	59.6328	0.329718	0.302996	1.08819	0.276511	1	FALSE
AC016747.3	315.801	0.0234501	0.269236	0.0870987	0.930593	1	FALSE
AC016757.3	10.5361	-0.16324	0.284867	-0.573039	0.566618	1	FALSE
AC016894.1	0.649325	-0.000353758	0.0922051	-0.00383664	0.996939	1	FALSE
AC016907.3	1.14988	-0.000907862	0.122065	-0.00743754	0.994066	1	FALSE
AC016910.1	0.250578	0.0212037	0.0747468	0.283673	0.776661	1	FALSE
AC016995.3	0.189273	0	0.0747468	0	1	1	FALSE
AC016999.2	0.194744	-0.0219514	0.0747468	-0.293677	0.769005	1	FALSE
AC017028.1	0.198878	0.0427812	0.0747468	0.572348	0.567086	1	FALSE
AC017048.1	0.831946	-0.0598508	0.109413	-0.547016	0.584368	1	FALSE
AC017060.1	0.448406	0.0212037	0.0747468	0.283673	0.776661	1	FALSE
AC017074.2	2.65748	-0.093741	0.199654	-0.469517	0.6387	1	FALSE
AC017079.4	0.518021	-0.000401739	0.0848552	-0.00473441	0.996222	1	FALSE
AC017083.2	0.872113	-0.045371	0.11134	-0.4075	0.683641	1	FALSE
AC017104.6	4.2518	0.163549	0.215657	0.758376	0.448226	1	FALSE
AC018359.1	0.260469	-0.043529	0.0747468	-0.582352	0.560329	1	FALSE
AC018442.1	0.306628	-0.000373885	0.0747468	-0.00500202	0.996009	1	FALSE
AC018462.2	29.3712	-0.00656754	0.306994	-0.021393	0.982932	1	FALSE
AC018463.5	0.547845	0.0405951	0.0777482	0.522136	0.601576	1	FALSE
AC018641.7	5.46733	0.10989	0.216199	0.508283	0.611255	1	FALSE
AC018737.3	0.194744	-0.0219514	0.0747468	-0.293677	0.769005	1	FALSE
AC018755.16	11.8501	-0.0148171	0.233161	-0.0635488	0.949329	1	FALSE
AC018755.17	0.457421	-0.0224656	0.0818591	-0.274443	0.783744	1	FALSE
AC018766.6	3.20704	-0.292083	0.15962	-1.82987	0.0672699	1	FALSE
AC018799.1	0.834683	-0.0249656	0.108361	-0.230392	0.817787	1	FALSE
AC018816.3	1.46851	0.060191	0.160312	0.375461	0.707318	1	FALSE
AC018865.5	0.403436	0	0.0751638	0	1	1	FALSE
AC018890.6	0.356156	-0.0219514	0.0747468	-0.293677	0.769005	1	FALSE
AC019050.1	2.02954	-0.0366505	0.160431	-0.228451	0.819296	1	FALSE
AC019097.7	0.829558	0.0329395	0.108224	0.304363	0.760851	1	FALSE
AC019109.1	0.254999	-0.0219514	0.0747468	-0.293677	0.769005	1	FALSE
AC019118.3	0.189273	0	0.0747468	0	1	1	FALSE
AC019129.1	1.48639	-0.0124953	0.149558	-0.0835484	0.933416	1	FALSE
AC019172.2	0.24634	-0.0219514	0.0747468	-0.293677	0.769005	1	FALSE
AC019181.3	0.800464	0.00962677	0.109563	0.0878651	0.929984	1	FALSE
AC019186.1	0.476665	-0.0219514	0.0747468	-0.293677	0.769005	1	FALSE
AC020550.7	0.662784	-0.0118908	0.0929479	-0.12793	0.898204	1	FALSE
AC020594.5	0.445322	0.00250245	0.0752267	0.0332655	0.973463	1	FALSE
AC020951.1	0.263023	0.0212037	0.0747468	0.283673	0.776661	1	FALSE
AC020983.5	0.711298	-0.0117963	0.0950978	-0.124044	0.90128	1	FALSE
AC021016.7	1.04155	0.0353068	0.127104	0.277779	0.781182	1	FALSE
AC021188.4	0.263023	0.0212037	0.0747468	0.283673	0.776661	1	FALSE
AC022007.5	10.2041	-0.158887	0.272674	-0.582697	0.560097	1	FALSE
AC022153.1	0.262677	0	0.0747468	0	1	1	FALSE
AC022154.7	2.50973	0.154972	0.181781	0.85252	0.393926	1	FALSE
AC022182.1	2.82696	-0.0822254	0.192024	-0.428203	0.668503	1	FALSE
AC022182.2	10.3775	0.265938	0.280125	0.949352	0.342442	1	FALSE
AC022201.5	3.75949	0.101645	0.220441	0.461099	0.644728	1	FALSE
AC022210.2	3.13414	0.0205251	0.201863	0.101678	0.919012	1	FALSE
AC022819.3	0.913259	0.046894	0.104116	0.450402	0.652421	1	FALSE
AC023115.2	0.556537	0.071972	0.0881962	0.816044	0.414475	1	FALSE
AC024082.4	0.250578	0.0212037	0.0747468	0.283673	0.776661	1	FALSE
AC024560.2	0.345215	0.0212037	0.0747468	0.283673	0.776661	1	FALSE
AC024560.3	284.662	-0.102652	0.305091	-0.336462	0.736522	1	FALSE
AC024592.9	1.71299	-0.0393162	0.161225	-0.24386	0.80734	1	FALSE
AC024704.2	0.600213	-0.000352473	0.0803115	-0.00438883	0.996498	1	FALSE
AC024937.6	0.189273	0	0.0747468	0	1	1	FALSE
AC025165.8	0.255703	-0.0219514	0.0747468	-0.293677	0.769005	1	FALSE
AC025171.1	10.9784	-0.296332	0.274429	-1.07981	0.280225	1	FALSE
AC025335.1	82.6525	0.133197	0.291092	0.457577	0.647257	1	FALSE
AC025442.3	0.355142	-0.000373885	0.0747468	-0.00500202	0.996009	1	FALSE
AC025750.5	0.467133	0.0212037	0.0747468	0.283673	0.776661	1	FALSE
AC025918.2	0.355106	-0.043529	0.0747468	-0.582352	0.560329	1	FALSE
AC026202.3	1.42991	0.0831317	0.134887	0.616305	0.537694	1	FALSE
AC026271.5	80.9376	0.173371	0.30719	0.564379	0.572496	1	FALSE
AC026471.6	0.415396	-0.000373885	0.0747468	-0.00500202	0.996009	1	FALSE
AC026954.6	0.548166	-0.043083	0.087086	-0.494718	0.620799	1	FALSE
AC027119.1	0.267443	-0.0219514	0.0747468	-0.293677	0.769005	1	FALSE
AC027601.1	0.990133	-0.0985827	0.0881553	-1.11828	0.263446	1	FALSE
AC027612.1	1.29231	-0.0712205	0.147243	-0.483694	0.628603	1	FALSE
AC034187.2	0.512097	0.00745387	0.0754071	0.0988484	0.921259	1	FALSE
AC034220.3	8.90836	-0.27399	0.256433	-1.06847	0.285311	1	FALSE
AC034243.1	9.75355	-0.0475793	0.278782	-0.170669	0.864484	1	FALSE
AC046143.3	10.0896	0.0611995	0.268085	0.228284	0.819426	1	FALSE
AC053503.4	1.66651	-0.0656439	0.162684	-0.403505	0.686577	1	FALSE
AC055764.1	0.240869	0	0.0747468	0	1	1	FALSE
AC055866.1	0.194744	-0.0219514	0.0747468	-0.293677	0.769005	1	FALSE
AC060834.2	7.29536	-0.109751	0.264111	-0.415549	0.67774	1	FALSE
AC060834.3	17.0075	0.2824	0.300031	0.941237	0.346583	1	FALSE
AC061961.2	1.039	-0.0664949	0.129387	-0.513923	0.607306	1	FALSE
AC061992.2	4.22267	0.102091	0.215949	0.472756	0.636387	1	FALSE
AC062017.1	3.26519	-0.0310447	0.193274	-0.160625	0.872389	1	FALSE
AC062028.1	1.65459	0.035731	0.158477	0.225465	0.821618	1	FALSE
AC062029.1	23.9464	-0.209362	0.307026	-0.681904	0.495299	1	FALSE
AC064836.3	0.824792	0.0593525	0.0999774	0.593659	0.55274	1	FALSE
AC064850.4	3.70659	0.114468	0.200006	0.572324	0.567102	1	FALSE
AC064852.4	0.311882	0.0427812	0.0747468	0.572348	0.567086	1	FALSE
AC067945.3	12.1381	0.117365	0.290742	0.403674	0.686452	1	FALSE
AC067945.4	0.316303	-0.000373885	0.0747468	-0.00500202	0.996009	1	FALSE
AC067959.1	0.91996	-0.000759723	0.101859	-0.00745855	0.994049	1	FALSE
AC068042.1	0.194076	0.0212037	0.0747468	0.283673	0.776661	1	FALSE
AC068134.10	2.88517	-0.118207	0.187766	-0.629542	0.528995	1	FALSE
AC068137.13	0.369759	0	0.0747468	0	1	1	FALSE
AC068282.3	19.7889	-0.20575	0.300942	-0.683687	0.494173	1	FALSE
AC068490.1	98.6446	-0.00419791	0.307498	-0.0136518	0.989108	1	FALSE
AC068490.2	268.806	0.164038	0.296151	0.5539	0.579647	1	FALSE
AC068491.3	0.931182	0	0.0961994	0	1	1	FALSE
AC068492.1	0.564503	-0.0221962	0.0877239	-0.253024	0.80025	1	FALSE
AC068499.10	4.37005	-0.182444	0.222751	-0.819048	0.412759	1	FALSE
AC068538.2	0.51291	0	0.0766536	0	1	1	FALSE
AC068580.5	2.41926	0.0124849	0.188078	0.0663819	0.947074	1	FALSE
AC068580.6	2.25352	-0.0669217	0.132539	-0.504921	0.613614	1	FALSE
AC068831.10	9.06996	0.0796678	0.272402	0.292464	0.769932	1	FALSE
AC068831.15	0.189273	0	0.0747468	0	1	1	FALSE
AC068831.16	3.24416	0.121517	0.193957	0.626514	0.530978	1	FALSE
AC068831.3	1.26963	-0.0298993	0.145611	-0.205336	0.837309	1	FALSE
AC068831.6	2.8564	-0.0580015	0.167701	-0.345862	0.729446	1	FALSE
AC068858.1	0.20652	0.0212037	0.0747468	0.283673	0.776661	1	FALSE
AC069154.4	0.410594	-0.0219514	0.0747468	-0.293677	0.769005	1	FALSE
AC069155.1	6.60674	-0.0651611	0.23827	-0.273476	0.784488	1	FALSE
AC069257.6	1.11775	-0.0718948	0.119021	-0.604049	0.545811	1	FALSE
AC069277.2	7.99671	-0.0686934	0.257967	-0.266287	0.790018	1	FALSE
AC069368.3	2.39247	-0.204212	0.158137	-1.29137	0.196577	1	FALSE
AC069513.4	1.0645	0.0233579	0.108315	0.215648	0.829262	1	FALSE
AC072052.7	7.05132	-0.126751	0.250126	-0.506749	0.612331	1	FALSE
AC072062.1	4.88691	-0.086004	0.239839	-0.358591	0.719901	1	FALSE
AC072062.3	0.669379	-0.0643968	0.101353	-0.63537	0.525187	1	FALSE
AC073043.1	3.06155	-0.0273936	0.201643	-0.135852	0.891939	1	FALSE
AC073046.25	28.0139	0.1593	0.29074	0.547913	0.583752	1	FALSE
AC073052.1	2.4071	0.0686664	0.190113	0.361188	0.717959	1	FALSE
AC073063.10	6.74949	-0.13448	0.254965	-0.527445	0.597884	1	FALSE
AC073069.2	0.397755	0.0743892	0.0751734	0.989568	0.322385	1	FALSE
AC073071.1	24.8666	-0.000605984	0.291069	-0.00208192	0.998339	1	FALSE
AC073072.5	1.17569	-0.015225	0.131678	-0.115623	0.907951	1	FALSE
AC073072.7	1.27566	-0.0858994	0.138308	-0.621072	0.534552	1	FALSE
AC073109.2	0.36208	-0.0219514	0.0747468	-0.293677	0.769005	1	FALSE
AC073130.1	0.250578	0.0212037	0.0747468	0.283673	0.776661	1	FALSE
AC073133.1	3.3532	-0.174788	0.196964	-0.88741	0.374858	1	FALSE
AC073133.2	0.92237	0.0242215	0.11585	0.209076	0.834389	1	FALSE
AC073150.6	0.263023	0.0212037	0.0747468	0.283673	0.776661	1	FALSE
AC073257.2	0.200215	-0.043529	0.0747468	-0.582352	0.560329	1	FALSE
AC073283.4	88.1794	0.0272713	0.299326	0.0911089	0.927406	1	FALSE
AC073283.7	0.811369	-0.0824688	0.101681	-0.811057	0.417333	1	FALSE
AC073316.1	0.714346	-0.0399901	0.096107	-0.4161	0.677337	1	FALSE
AC073321.4	1.35016	0.139434	0.132536	1.05205	0.292778	1	FALSE
AC073326.3	0.82427	-0.0712295	0.108175	-0.658467	0.510238	1	FALSE
AC073333.8	0.791665	-0.0160888	0.088966	-0.180842	0.856492	1	FALSE
AC073342.12	2.30277	-0.156219	0.177679	-0.879218	0.379283	1	FALSE
AC073343.13	13.0937	0.0347382	0.285375	0.121729	0.903114	1	FALSE
AC073387.2	0.399093	-0.000519086	0.0752186	-0.00690104	0.994494	1	FALSE
AC073410.1	7.24377	-0.159612	0.249578	-0.639529	0.522479	1	FALSE
AC073415.2	5.63314	0.013475	0.243012	0.0554502	0.95578	1	FALSE
AC073465.1	0.260469	-0.043529	0.0747468	-0.582352	0.560329	1	FALSE
AC073465.3	0.710067	0.0263211	0.104613	0.251604	0.801347	1	FALSE
AC073551.1	0.360577	-0.0650538	0.0747498	-0.870288	0.384143	1	FALSE
AC073842.19	0.518403	0.0630991	0.0770536	0.818899	0.412844	1	FALSE
AC073869.2	0.776806	-0.0264036	0.107976	-0.244531	0.806819	1	FALSE
AC073900.4	0.374525	-0.0219514	0.0747468	-0.293677	0.769005	1	FALSE
AC074019.2	0.698291	-0.0269102	0.104072	-0.258573	0.795965	1	FALSE
AC074117.10	148.067	-0.223459	0.271405	-0.823341	0.410314	1	FALSE
AC074117.13	1.07691	-0.0431893	0.119699	-0.360815	0.718238	1	FALSE
AC074141.3	81.0243	-0.1652	0.304362	-0.542776	0.587284	1	FALSE
AC074212.5	48.7572	-0.155473	0.307309	-0.505917	0.612915	1	FALSE
AC074212.6	7.96068	-0.18845	0.262673	-0.717432	0.473108	1	FALSE
AC074286.1	40.0505	-0.0430873	0.307906	-0.139936	0.88871	1	FALSE
AC074289.1	43.7994	0.0707969	0.305907	0.231433	0.816979	1	FALSE
AC074366.3	1.22854	0.0201206	0.129102	0.15585	0.876151	1	FALSE
AC074367.1	0.449743	-0.0407292	0.0752198	-0.541469	0.588184	1	FALSE
AC074391.1	2.99561	-0.117363	0.182011	-0.644815	0.519047	1	FALSE
AC078852.1	2.95796	-0.158216	0.190888	-0.82884	0.407195	1	FALSE
AC078852.2	0.568636	0.0337674	0.0789021	0.427966	0.668676	1	FALSE
AC078883.3	12.0627	-0.158469	0.283191	-0.559585	0.575763	1	FALSE
AC078883.4	0.446555	-0.0553597	0.0752648	-0.735532	0.462015	1	FALSE
AC078899.1	19.8884	-0.134307	0.257387	-0.521811	0.601802	1	FALSE
AC078899.3	7.48312	-0.177604	0.252216	-0.704174	0.481325	1	FALSE
AC078899.4	0.194076	0.0212037	0.0747468	0.283673	0.776661	1	FALSE
AC078941.1	45.7843	0.0327756	0.307557	0.106567	0.915132	1	FALSE
AC079145.4	2.59627	0.0513419	0.170169	0.301712	0.762872	1	FALSE
AC079150.2	7.44306	-0.0429526	0.229591	-0.187083	0.851595	1	FALSE
AC079150.3	0.460016	-0.0399744	0.0752911	-0.530932	0.595466	1	FALSE
AC079199.2	0.250232	0	0.0747468	0	1	1	FALSE
AC079248.1	0.3088	0	0.0747468	0	1	1	FALSE
AC079250.1	3.63261	-0.058616	0.201454	-0.290965	0.771078	1	FALSE
AC079305.10	4.36977	-0.174216	0.186483	-0.934222	0.350189	1	FALSE
AC079354.3	2.66971	-0.0774556	0.187016	-0.414166	0.678752	1	FALSE
AC079354.5	1.27765	0.0437753	0.136211	0.321378	0.747924	1	FALSE
AC079586.1	0.982171	0.0117682	0.118917	0.0989618	0.921169	1	FALSE
AC079610.2	0.510379	0.0223168	0.0846908	0.26351	0.792158	1	FALSE
AC079630.4	0.457098	0.0470088	0.0818745	0.574157	0.565861	1	FALSE
AC079741.2	0.250578	0.0212037	0.0747468	0.283673	0.776661	1	FALSE
AC079742.4	0.840177	-0.0382363	0.100993	-0.378602	0.704984	1	FALSE
AC079776.1	1.88008	-0.0788561	0.154254	-0.511211	0.609204	1	FALSE
AC079776.2	1.08974	-0.0177083	0.110016	-0.160961	0.872124	1	FALSE
AC079776.4	2.15246	0.0935079	0.165152	0.566191	0.571264	1	FALSE
AC079779.4	0.253314	0	0.0747468	0	1	1	FALSE
AC079779.5	0.207189	-0.0219514	0.0747468	-0.293677	0.769005	1	FALSE
AC079780.3	0.988235	-0.0270389	0.100988	-0.267742	0.788898	1	FALSE
AC079781.8	0.360577	-0.0650538	0.0747498	-0.870288	0.384143	1	FALSE
AC079807.1	0.262677	0	0.0747468	0	1	1	FALSE
AC079807.2	8.92047	-0.0798205	0.269528	-0.296149	0.767116	1	FALSE
AC079807.4	1.47582	0.139705	0.141792	0.985276	0.324489	1	FALSE
AC079834.1	0.366882	-0.000373885	0.0747468	-0.00500202	0.996009	1	FALSE
AC079896.1	34.6735	-0.270563	0.30702	-0.881257	0.378179	1	FALSE
AC079922.2	1.91326	0.0190628	0.15737	0.121133	0.903585	1	FALSE
AC079922.3	28.7021	0.174103	0.307855	0.565535	0.57171	1	FALSE
AC080094.1	0.553984	-0.00777629	0.0873652	-0.089009	0.929075	1	FALSE
AC080125.1	0.357314	0	0.0747468	0	1	1	FALSE
AC083843.1	141.198	0.201921	0.306533	0.658725	0.510072	1	FALSE
AC083843.2	0.723657	0.0329541	0.0863941	0.381439	0.702878	1	FALSE
AC083843.4	2.93955	0.104661	0.173363	0.60371	0.546037	1	FALSE
AC083873.4	8.57574	-0.104496	0.232283	-0.449867	0.652806	1	FALSE
AC083884.8	1.74461	-0.0749402	0.118344	-0.633239	0.526578	1	FALSE
AC083899.1	0.302174	0.0212037	0.0747468	0.283673	0.776661	1	FALSE
AC083899.3	31.4056	0.16019	0.307378	0.521151	0.602262	1	FALSE
AC083900.1	0.710975	0.0494636	0.0878271	0.563193	0.573303	1	FALSE
AC083949.1	0.40891	0	0.0747468	0	1	1	FALSE
AC084082.3	0.435613	-0.0192136	0.0752065	-0.255477	0.798354	1	FALSE
AC084117.3	1.57472	-0.0919294	0.154401	-0.595395	0.551579	1	FALSE
AC084149.2	1.03153	-0.000354713	0.106867	-0.00331919	0.997352	1	FALSE
AC084219.4	172.598	0.0924	0.289097	0.319616	0.749259	1	FALSE
AC084809.2	10.1255	0.0530655	0.27583	0.192385	0.847441	1	FALSE
AC084809.3	5.17172	-0.274824	0.23538	-1.16758	0.242977	1	FALSE
AC087073.1	80.3296	-0.066855	0.307904	-0.21713	0.828107	1	FALSE
AC087163.2	0.868221	-0.0800618	0.12047	-0.66458	0.506319	1	FALSE
AC087163.3	1.21149	-0.0998857	0.104043	-0.960047	0.337031	1	FALSE
AC087294.2	3.39036	0.148009	0.211496	0.699819	0.48404	1	FALSE
AC087350.1	0.496918	0.00387736	0.0837709	0.0462853	0.963083	1	FALSE
AC087491.2	0.25538	0.0427812	0.0747468	0.572348	0.567086	1	FALSE
AC087499.10	0.715504	-0.0324664	0.0953877	-0.340362	0.733584	1	FALSE
AC087499.4	0.256049	-0.000373885	0.0747468	-0.00500202	0.996009	1	FALSE
AC087499.5	0.340308	0.0212037	0.0747468	0.283673	0.776661	1	FALSE
AC087650.1	1.88591	-0.130066	0.174492	-0.745398	0.456031	1	FALSE
AC090286.2	0.75882	0.0404672	0.0983614	0.411414	0.680769	1	FALSE
AC090453.1	0.201718	0	0.0747468	0	1	1	FALSE
AC090498.1	6.13929	0.00738786	0.251227	0.0294071	0.97654	1	FALSE
AC090505.5	1.80481	0.0740481	0.158078	0.468429	0.639478	1	FALSE
AC090505.6	0.661068	0.0111196	0.0920381	0.120815	0.903838	1	FALSE
AC090587.4	8.67363	0.0296672	0.264035	0.112361	0.910537	1	FALSE
AC090587.5	0.765068	0.0110426	0.0980802	0.112587	0.910358	1	FALSE
AC090616.2	14.508	0.0477533	0.282055	0.169305	0.865557	1	FALSE
AC090804.1	1.6484	-0.0363949	0.14803	-0.245862	0.805789	1	FALSE
AC091133.1	7.65102	-0.18935	0.267716	-0.707278	0.479393	1	FALSE
AC091492.2	0.387102	0	0.0747468	0	1	1	FALSE
AC091633.2	3.77267	-0.122572	0.212552	-0.576667	0.564164	1	FALSE
AC091633.3	3.00824	-0.149097	0.201967	-0.738223	0.460379	1	FALSE
AC091654.7	48.9326	0.00105312	0.148629	0.00708554	0.994347	1	FALSE
AC091729.7	4.97482	0.107236	0.239375	0.447983	0.654165	1	FALSE
AC091729.9	150.829	-0.143805	0.306698	-0.468881	0.639155	1	FALSE
AC091878.1	11.2926	0.0316882	0.266368	0.118964	0.905304	1	FALSE
AC091962.3	1.208	0.0230409	0.133302	0.172847	0.862772	1	FALSE
AC092066.1	70.7222	-0.14437	0.307402	-0.469647	0.638607	1	FALSE
AC092106.1	0.921112	-0.0301859	0.105243	-0.286822	0.774249	1	FALSE
AC092155.1	0.44911	0.036737	0.0752345	0.4883	0.625337	1	FALSE
AC092159.2	5.29278	-0.241129	0.237965	-1.01329	0.310919	1	FALSE
AC092162.1	1.68442	-0.0899001	0.138852	-0.647451	0.51734	1	FALSE
AC092171.2	5.36403	-0.223659	0.243514	-0.918464	0.358376	1	FALSE
AC092171.4	0.350685	-0.000373885	0.0747468	-0.00500202	0.996009	1	FALSE
AC092198.1	7.49535	0.112511	0.255056	0.441121	0.659125	1	FALSE
AC092295.4	0.544415	-0.00053933	0.087497	-0.00616398	0.995082	1	FALSE
AC092316.1	0.39429	-0.0191889	0.0751928	-0.255196	0.798572	1	FALSE
AC092535.3	0.994217	0.0958196	0.110539	0.866836	0.386032	1	FALSE
AC092569.2	7.25091	0.121785	0.242306	0.50261	0.615239	1	FALSE
AC092570.3	0.315958	-0.0219514	0.0747468	-0.293677	0.769005	1	FALSE
AC092573.2	3.02668	-0.107372	0.205089	-0.523539	0.600599	1	FALSE
AC092610.12	1.53192	-0.104961	0.14913	-0.70382	0.481545	1	FALSE
AC092614.2	22.9716	-0.355606	0.30247	-1.17567	0.239726	1	FALSE
AC092620.2	0.797516	0.0243949	0.0805235	0.302954	0.761925	1	FALSE
AC092620.3	0.773783	0.112139	0.091283	1.22848	0.219269	1	FALSE
AC092625.1	0.751845	0.0193582	0.0973081	0.198937	0.842312	1	FALSE
AC092641.2	0.194744	-0.0219514	0.0747468	-0.293677	0.769005	1	FALSE
AC092642.1	2.19964	-0.0307186	0.18298	-0.167879	0.866678	1	FALSE
AC092646.1	0.255703	-0.0219514	0.0747468	-0.293677	0.769005	1	FALSE
AC092646.2	0.615611	-0.0528862	0.090976	-0.581321	0.561024	1	FALSE
AC092664.1	0.821915	-0.0112744	0.110402	-0.102121	0.91866	1	FALSE
AC092669.6	1.67036	0.0981383	0.154907	0.633531	0.526387	1	FALSE
AC092687.5	0.403436	0	0.0751638	0	1	1	FALSE
AC092755.4	0.415361	-0.043529	0.0747468	-0.582352	0.560329	1	FALSE
AC092798.2	0.600572	-0.0188503	0.0821453	-0.229475	0.8185	1	FALSE
AC092835.2	56.1422	0.0485845	0.291014	0.166949	0.86741	1	FALSE
AC093106.6	0.401231	-0.0219514	0.0747468	-0.293677	0.769005	1	FALSE
AC093107.7	0.737787	0.00871234	0.0954976	0.091231	0.927309	1	FALSE
AC093110.3	0.460684	-0.0767146	0.0752652	-1.01926	0.308081	1	FALSE
AC093142.2	1.19878	0.0498223	0.113426	0.43925	0.660481	1	FALSE
AC093159.1	3.46827	-0.221278	0.206226	-1.07298	0.283278	1	FALSE
AC093162.5	0.61904	0.00112317	0.0758579	0.0148063	0.988187	1	FALSE
AC093323.3	334.333	0.205007	0.25541	0.802656	0.422174	1	FALSE
AC093375.1	44.4748	0.0258231	0.293093	0.0881056	0.929793	1	FALSE
AC093382.1	0.961875	-0.0468647	0.116678	-0.401659	0.687935	1	FALSE
AC093388.3	1.82988	0.101757	0.138568	0.734346	0.462738	1	FALSE
AC093390.1	9.58924	0.134667	0.268252	0.502018	0.615655	1	FALSE
AC093495.4	1.51993	-0.143505	0.160052	-0.896617	0.369923	1	FALSE
AC093616.4	0.556156	-0.00756505	0.0871814	-0.0867737	0.930851	1	FALSE
AC093620.5	14.5788	-0.186695	0.298695	-0.625035	0.531948	1	FALSE
AC093627.10	13.1876	-0.0953137	0.278701	-0.341993	0.732356	1	FALSE
AC093627.12	0.199546	-0.000373885	0.0747468	-0.00500202	0.996009	1	FALSE
AC093627.7	0.75458	0.0233958	0.0893025	0.261984	0.793334	1	FALSE
AC093627.9	33.3456	0.0315026	0.306997	0.102615	0.918268	1	FALSE
AC093642.1	1.91779	-0.0865919	0.16711	-0.518172	0.604338	1	FALSE
AC093642.3	7.0676	-0.111885	0.262563	-0.426126	0.670016	1	FALSE
AC093642.5	11.5176	0.0167715	0.286988	0.0584397	0.953398	1	FALSE
AC093673.5	286.511	0.0200002	0.25912	0.0771848	0.938477	1	FALSE
AC093698.1	1.04866	0.0897464	0.119177	0.753052	0.451419	1	FALSE
AC093724.2	15.8207	-0.154527	0.266517	-0.5798	0.562049	1	FALSE
AC093818.1	127.837	-0.0293941	0.307885	-0.0954708	0.923941	1	FALSE
AC093838.4	616.67	-0.164304	0.294415	-0.55807	0.576797	1	FALSE
AC093850.1	0.349635	-0.0219514	0.0747468	-0.293677	0.769005	1	FALSE
AC093899.3	0.307296	-0.043529	0.0747468	-0.582352	0.560329	1	FALSE
AC093901.1	9.93839	-0.0668136	0.27421	-0.243659	0.807495	1	FALSE
AC096574.4	2.81646	0.0813563	0.195594	0.415944	0.677451	1	FALSE
AC096574.5	30.1122	-0.153632	0.303535	-0.506144	0.612756	1	FALSE
AC096649.1	1.91299	-0.059645	0.139096	-0.428804	0.668066	1	FALSE
AC096649.2	0.869066	-0.0146174	0.111699	-0.130864	0.895883	1	FALSE
AC096664.1	1.75974	0.127704	0.152205	0.839025	0.401455	1	FALSE
AC096664.2	0.469198	0.0178769	0.0753079	0.237384	0.812359	1	FALSE
AC096670.3	0.254999	-0.0219514	0.0747468	-0.293677	0.769005	1	FALSE
AC097374.2	0.306594	-0.0219514	0.0747468	-0.293677	0.769005	1	FALSE
AC097382.5	0.866535	0.00873439	0.113419	0.0770097	0.938616	1	FALSE
AC097467.2	0.360577	-0.0650538	0.0747498	-0.870288	0.384143	1	FALSE
AC097468.4	31.9281	0.118249	0.307638	0.384378	0.700698	1	FALSE
AC097468.7	0.20652	0.0212037	0.0747468	0.283673	0.776661	1	FALSE
AC097523.1	0.835028	-0.0533586	0.102726	-0.519426	0.603464	1	FALSE
AC097533.1	0.25538	0.0427812	0.0747468	0.572348	0.567086	1	FALSE
AC097662.2	61.9623	0.148044	0.294938	0.501947	0.615704	1	FALSE
AC097711.1	0.734576	-0.000775644	0.094847	-0.00817784	0.993475	1	FALSE
AC097713.5	0.774106	0.0694602	0.107471	0.646315	0.518076	1	FALSE
AC097721.1	0.300322	-0.0650319	0.0747493	-0.87	0.3843	1	FALSE
AC097721.2	4.63142	-0.145634	0.226201	-0.643825	0.519689	1	FALSE
AC097724.3	24.2797	0.190219	0.303591	0.626562	0.530946	1	FALSE
AC098614.1	0.255703	-0.0219514	0.0747468	-0.293677	0.769005	1	FALSE
AC098614.2	32.981	0.135934	0.307838	0.441577	0.658796	1	FALSE
AC098617.1	0.383349	0.0191361	0.0750961	0.254821	0.798861	1	FALSE
AC098820.2	0.256049	-0.000373885	0.0747468	-0.00500202	0.996009	1	FALSE
AC098820.3	5.10862	-0.153032	0.233266	-0.656042	0.511797	1	FALSE
AC098820.4	0.35924	0.0212037	0.0747468	0.283673	0.776661	1	FALSE
AC098973.2	28.4481	0.198995	0.307161	0.647853	0.51708	1	FALSE
AC099535.4	1.31562	-0.0854102	0.135769	-0.629086	0.529293	1	FALSE
AC099668.5	0.311537	0.0212037	0.0747468	0.283673	0.776661	1	FALSE
AC099754.1	0.200215	-0.043529	0.0747468	-0.582352	0.560329	1	FALSE
AC099850.1	8.69687	-0.00507429	0.269594	-0.0188219	0.984983	1	FALSE
AC100830.4	4.87493	-0.106939	0.222919	-0.479721	0.631426	1	FALSE
AC100830.5	0.401613	0.0427812	0.0747468	0.572348	0.567086	1	FALSE
AC104024.1	0.355811	-0.043529	0.0747468	-0.582352	0.560329	1	FALSE
AC104058.1	0.201718	0	0.0747468	0	1	1	FALSE
AC104076.2	0.347951	0	0.0747468	0	1	1	FALSE
AC104076.3	0.690325	0.0725617	0.09492	0.764451	0.444598	1	FALSE
AC104131.1	0.302174	0.0212037	0.0747468	0.283673	0.776661	1	FALSE
AC104297.1	3.19451	-0.0570321	0.187596	-0.304015	0.761116	1	FALSE
AC104304.4	46.9121	-0.179259	0.307635	-0.582698	0.560096	1	FALSE
AC104306.1	0.511047	-0.0232412	0.0847403	-0.274263	0.783882	1	FALSE
AC104389.28	0.359908	-0.0219514	0.0747468	-0.293677	0.769005	1	FALSE
AC104389.32	0.255703	-0.0219514	0.0747468	-0.293677	0.769005	1	FALSE
AC104451.2	0.198878	0.0427812	0.0747468	0.572348	0.567086	1	FALSE
AC104532.3	0.200215	-0.043529	0.0747468	-0.582352	0.560329	1	FALSE
AC104532.4	0.662751	-0.0439102	0.0932903	-0.470684	0.637867	1	FALSE
AC104634.3	0.590541	0.0217235	0.0897324	0.242092	0.808709	1	FALSE
AC104651.2	2.31513	-0.0658041	0.164773	-0.399361	0.689627	1	FALSE
AC104653.1	0.784613	0.0193565	0.0985787	0.196355	0.844332	1	FALSE
AC104654.2	0.259801	-0.000373885	0.0747468	-0.00500202	0.996009	1	FALSE
AC104655.3	12.1118	0.145306	0.27151	0.535178	0.592526	1	FALSE
AC104667.3	8.86643	-0.0855952	0.254168	-0.336766	0.736294	1	FALSE
AC104809.4	0.374525	-0.0219514	0.0747468	-0.293677	0.769005	1	FALSE
AC104820.2	0.200215	-0.043529	0.0747468	-0.582352	0.560329	1	FALSE
AC104843.3	0.451951	0	0.0752073	0	1	1	FALSE
AC105339.1	0.659562	-0.0424897	0.0847729	-0.501218	0.616217	1	FALSE
AC105342.1	3.32797	0.116672	0.202373	0.576521	0.564263	1	FALSE
AC105399.2	1.25528	0.048459	0.127993	0.378607	0.70498	1	FALSE
AC105402.2	1.18287	-0.0423156	0.103528	-0.408736	0.682734	1	FALSE
AC105402.3	0.522823	0.0222567	0.0854226	0.260548	0.794441	1	FALSE
AC105760.2	11.3394	0.0750761	0.276528	0.271495	0.78601	1	FALSE
AC105760.3	0.194076	0.0212037	0.0747468	0.283673	0.776661	1	FALSE
AC106782.20	0.835029	0.00882774	0.108568	0.0813106	0.935195	1	FALSE
AC106786.1	0.311537	0.0212037	0.0747468	0.283673	0.776661	1	FALSE
AC106875.1	4.81063	0.0667905	0.185631	0.359803	0.718994	1	FALSE
AC107081.5	0.399093	-0.000519086	0.0752186	-0.00690104	0.994494	1	FALSE
AC107218.3	32.0726	-0.0663725	0.307146	-0.216094	0.828914	1	FALSE
AC108004.3	0.298317	0.0641039	0.0747554	0.857515	0.39116	1	FALSE
AC108025.2	3.92596	-0.143619	0.20687	-0.694248	0.487527	1	FALSE
AC108039.1	0.441084	-0.0374295	0.0752465	-0.497426	0.618889	1	FALSE
AC108039.3	0.467824	0.0644519	0.0747624	0.86209	0.388638	1	FALSE
AC108051.2	0.320724	-0.043529	0.0747468	-0.582352	0.560329	1	FALSE
AC108051.3	0.589869	0.0331455	0.0800971	0.413817	0.679008	1	FALSE
AC108142.1	85.3766	0.0515957	0.295093	0.174846	0.861201	1	FALSE
AC108448.3	0.199546	-0.000373885	0.0747468	-0.00500202	0.996009	1	FALSE
AC108463.2	1.3618	0.0744286	0.140672	0.529094	0.59674	1	FALSE
AC108479.2	0.661554	0.0841331	0.0933204	0.901551	0.367295	1	FALSE
AC108488.4	28.3494	-0.206245	0.306443	-0.67303	0.500928	1	FALSE
AC108925.1	0.254999	-0.0219514	0.0747468	-0.293677	0.769005	1	FALSE
AC109333.10	1.52133	-0.0583926	0.146666	-0.398134	0.690531	1	FALSE
AC109631.1	0.302174	0.0212037	0.0747468	0.283673	0.776661	1	FALSE
AC109642.1	3.75686	0.072524	0.222675	0.325694	0.744656	1	FALSE
AC109815.2	1.61885	0.0180668	0.147077	0.12284	0.902234	1	FALSE
AC110299.5	0.41063	0.0212037	0.0747468	0.283673	0.776661	1	FALSE
AC110615.1	0.262677	0	0.0747468	0	1	1	FALSE
AC110781.3	0.855848	0.0381759	0.100401	0.380234	0.703772	1	FALSE
AC110926.4	0.703441	0.0515808	0.0938046	0.549875	0.582405	1	FALSE
AC111155.1	0.518403	0.0630991	0.0770536	0.818899	0.412844	1	FALSE
AC111200.7	0.267443	-0.0219514	0.0747468	-0.293677	0.769005	1	FALSE
AC112198.1	0.198878	0.0427812	0.0747468	0.572348	0.567086	1	FALSE
AC112229.1	0.92311	0.0612529	0.0937415	0.653423	0.513484	1	FALSE
AC112497.1	1.09918	-0.0589171	0.0915838	-0.643313	0.520021	1	FALSE
AC112715.2	0.508349	0.0221935	0.0845928	0.262357	0.793046	1	FALSE
AC113189.5	132.569	0.205045	0.282118	0.726804	0.467346	1	FALSE
AC113404.1	5.02292	0.0648206	0.231663	0.279805	0.779627	1	FALSE
AC113607.2	0.240869	0	0.0747468	0	1	1	FALSE
AC114271.2	150.633	0.137623	0.305359	0.45069	0.652213	1	FALSE
AC114730.2	2.65661	-0.134081	0.191746	-0.699265	0.484387	1	FALSE
AC114730.3	9.17032	0.0280449	0.239756	0.116972	0.906882	1	FALSE
AC114730.8	0.497863	0.0482944	0.075581	0.638976	0.522838	1	FALSE
AC114755.3	0.20652	0.0212037	0.0747468	0.283673	0.776661	1	FALSE
AC114755.7	0.296355	0	0.0747468	0	1	1	FALSE
AC114776.3	0.200215	-0.043529	0.0747468	-0.582352	0.560329	1	FALSE
AC114803.3	26.1524	-0.0211409	0.247922	-0.0852721	0.932045	1	FALSE
AC114877.3	0.703786	0.0675353	0.0856545	0.788462	0.430427	1	FALSE
AC115617.2	2.38075	-0.0753575	0.18529	-0.4067	0.684229	1	FALSE
AC116035.1	1.82582	0.024422	0.164841	0.148155	0.88222	1	FALSE
AC116366.6	0.301828	0	0.0747468	0	1	1	FALSE
AC116609.2	11.5087	0.0773803	0.272071	0.284412	0.776094	1	FALSE
AC116609.3	0.349635	-0.0219514	0.0747468	-0.293677	0.769005	1	FALSE
AC116614.1	11.726	0.156592	0.287088	0.545449	0.585444	1	FALSE
AC117947.1	0.791665	-0.0160888	0.088966	-0.180842	0.856492	1	FALSE
AC123023.1	3.24689	-0.0617613	0.203428	-0.303602	0.761431	1	FALSE
AC123886.2	0.59797	0.0283901	0.0758913	0.37409	0.708338	1	FALSE
AC124789.1	17.9106	0.0126782	0.285585	0.0443937	0.964591	1	FALSE
AC124944.3	0.438698	0	0.0747468	0	1	1	FALSE
AC124944.5	25.1713	0.0128098	0.307701	0.0416308	0.966793	1	FALSE
AC125232.1	50.6775	0.278552	0.30203	0.922264	0.356391	1	FALSE
AC125238.2	2.00126	-0.0012274	0.160362	-0.00765394	0.993893	1	FALSE
AC126544.4	3.42556	-0.0458828	0.16877	-0.271866	0.785725	1	FALSE
AC127904.2	5.27901	-0.275345	0.229726	-1.19858	0.230691	1	FALSE
AC129492.1	0.555357	-0.0341332	0.0783395	-0.435709	0.663048	1	FALSE
AC129492.6	31.4376	-0.287681	0.307691	-0.934967	0.349805	1	FALSE
AC131056.3	0.355487	0.0212037	0.0747468	0.283673	0.776661	1	FALSE
AC131097.4	1.38488	-0.0505322	0.139702	-0.361715	0.717565	1	FALSE
AC132008.1	1.03405	0.0569961	0.117999	0.483022	0.62908	1	FALSE
AC133644.3	0.240869	0	0.0747468	0	1	1	FALSE
AC133680.1	0.408907	-0.0191853	0.0752112	-0.255085	0.798657	1	FALSE
AC133785.1	1.4303	0.0659838	0.131791	0.50067	0.616604	1	FALSE
AC136289.1	1.2181	-0.124213	0.136563	-0.909569	0.36305	1	FALSE
AC136352.3	25.1938	0.0756716	0.295319	0.256237	0.797768	1	FALSE
AC137723.5	2.76363	-0.0722148	0.18798	-0.384161	0.700859	1	FALSE
AC137932.4	2.96164	-0.034684	0.195328	-0.177568	0.859062	1	FALSE
AC137932.5	1.13265	-0.0329571	0.120441	-0.273637	0.784363	1	FALSE
AC137932.6	1.37526	0.0475151	0.127567	0.372473	0.709541	1	FALSE
AC137934.1	1.2899	-0.0753056	0.126603	-0.594816	0.551967	1	FALSE
AC138035.2	17.7929	-0.271596	0.265935	-1.02129	0.307118	1	FALSE
AC138430.4	5.41346	-0.0357281	0.238912	-0.149545	0.881124	1	FALSE
AC138517.4	1.05525	-0.000910811	0.118843	-0.00766399	0.993885	1	FALSE
AC138517.6	0.305959	0.0427812	0.0747468	0.572348	0.567086	1	FALSE
AC138623.1	0.201718	0	0.0747468	0	1	1	FALSE
AC138969.4	2.46292	-0.253913	0.164686	-1.5418	0.123122	1	FALSE
AC139100.3	0.796226	-0.0480213	0.107927	-0.444943	0.656361	1	FALSE
AC139100.4	18.0951	0.123082	0.271874	0.452718	0.650751	1	FALSE
AC139143.2	1.60524	-0.0336109	0.148506	-0.226328	0.820947	1	FALSE
AC139712.2	0.20652	0.0212037	0.0747468	0.283673	0.776661	1	FALSE
AC139887.4	1.18084	0.0390792	0.125166	0.31222	0.754873	1	FALSE
AC140076.1	0.663237	-0.00982614	0.0924647	-0.106269	0.915369	1	FALSE
AC140481.8	0.70449	0.0950261	0.0962683	0.987097	0.323595	1	FALSE
AC140542.2	42.5669	-0.0249376	0.307892	-0.0809945	0.935446	1	FALSE
AC141586.5	62.7835	0.265068	0.294402	0.90036	0.367929	1	FALSE
AC141928.1	198.864	0.0494211	0.266591	0.185382	0.85293	1	FALSE
AC141930.2	1.0284	0.0204123	0.1173	0.174017	0.861852	1	FALSE
AC142119.1	6.85263	-0.154262	0.248898	-0.619783	0.535401	1	FALSE
AC142472.6	46.9789	0.0593093	0.303908	0.195155	0.845271	1	FALSE
AC142528.1	2.88594	-0.0968376	0.179256	-0.54022	0.589046	1	FALSE
AC144449.1	5.41754	-0.0170644	0.237222	-0.0719344	0.942654	1	FALSE
AC144450.1	0.622898	-0.0251153	0.0809188	-0.310376	0.756275	1	FALSE
AC144450.2	0.810032	-0.00116964	0.111288	-0.01051	0.991614	1	FALSE
AC144530.1	13.8865	0.199559	0.266803	0.747965	0.454482	1	FALSE
AC144652.1	83.1534	0.0293904	0.292502	0.100479	0.919964	1	FALSE
AC144831.1	1.47397	-0.00484753	0.143366	-0.0338123	0.973027	1	FALSE
AC144831.3	0.255035	0.0212037	0.0747468	0.283673	0.776661	1	FALSE
AC145124.2	3.87239	0.100468	0.22525	0.44603	0.655576	1	FALSE
AC145343.2	0.959812	-0.0111218	0.117694	-0.094498	0.924714	1	FALSE
AC156455.1	12.0441	0.19059	0.281812	0.676301	0.498849	1	FALSE
AC159540.1	3.21498	-0.09426	0.207019	-0.455321	0.648878	1	FALSE
AC213203.1	0.712097	0.0238214	0.103895	0.229283	0.818649	1	FALSE
AC226118.1	7.15728	0.180808	0.259651	0.696351	0.486209	1	FALSE
AC226119.4	0.756409	0.0199109	0.096191	0.206993	0.836015	1	FALSE
AC240274.1	101.06	0.0404051	0.305271	0.132358	0.894701	1	FALSE
AC241585.1	1.45901	-0.0308301	0.136291	-0.226208	0.821039	1	FALSE
AC245100.1	19.046	-0.076594	0.301969	-0.253649	0.799767	1	FALSE
ACA64	1.09717	0.011069	0.0912109	0.121356	0.903409	1	FALSE
ACAA1	800.602	0.0561487	0.259161	0.216656	0.828477	1	FALSE
ACAA2	2363.37	0.081673	0.226613	0.360408	0.718542	1	FALSE
ACACA	3985.52	0.145757	0.276913	0.526366	0.598634	1	FALSE
ACACB	92.2832	-0.0463295	0.292882	-0.158185	0.874311	1	FALSE
ACAD10	455.798	-0.280504	0.27978	-1.00259	0.31606	1	FALSE
ACAD11	39.9141	0.0529675	0.306966	0.172551	0.863004	1	FALSE
ACAD8	729.8	-0.0409126	0.272731	-0.150011	0.880756	1	FALSE
ACAD9	967.877	-0.0239821	0.231081	-0.103782	0.917342	1	FALSE
ACADL	18.1434	-0.126466	0.302673	-0.417829	0.676072	1	FALSE
ACADM	2571.51	0.120413	0.247934	0.485666	0.627204	1	FALSE
ACADS	539.892	0.0190828	0.2788	0.0684464	0.94543	1	FALSE
ACADSB	1138.95	-0.103891	0.275559	-0.377021	0.706158	1	FALSE
ACADVL	3855.77	-0.149145	0.281645	-0.52955	0.596424	1	FALSE
ACAN	19.2016	0.265949	0.303454	0.876409	0.380808	1	FALSE
ACAP1	69.3019	-0.0598032	0.307908	-0.194224	0.846	1	FALSE
ACAP2	1881.91	-0.0779383	0.266579	-0.292365	0.770008	1	FALSE
ACAP2-IT1	2.588	0.10437	0.1889	0.552513	0.580597	1	FALSE
ACAP3	855.997	-0.228101	0.298378	-0.764469	0.444588	1	FALSE
ACAT1	732.483	0.181098	0.2581	0.701657	0.482893	1	FALSE
ACAT2	4322.57	0.234711	0.260813	0.899921	0.368162	1	FALSE
ACBD3	1463.5	0.124126	0.231539	0.536093	0.591894	1	FALSE
ACBD4	116.515	-0.0425282	0.274865	-0.154724	0.877039	1	FALSE
ACBD5	896.12	0.106033	0.278067	0.381322	0.702964	1	FALSE
ACBD6	1244.3	0.0831993	0.230668	0.360689	0.718332	1	FALSE
ACBD7	24.6058	0.103936	0.307252	0.338275	0.735156	1	FALSE
ACCS	234.157	-0.0640394	0.291205	-0.219912	0.82594	1	FALSE
ACD	786.445	0.0287172	0.296092	0.0969872	0.922737	1	FALSE
ACE	94.6304	-0.131432	0.301185	-0.436384	0.662558	1	FALSE
ACE2	21.4117	-0.102646	0.301392	-0.340573	0.733425	1	FALSE
ACER1	0.401264	-0.000453047	0.0783432	-0.00578285	0.995386	1	FALSE
ACER2	11.2942	-0.0166545	0.278391	-0.0598244	0.952296	1	FALSE
ACER3	719.721	-0.0992599	0.257876	-0.384913	0.700302	1	FALSE
ACHE	731.624	-0.152092	0.307773	-0.494169	0.621187	1	FALSE
ACIN1	10608.8	0.0233627	0.254909	0.0916512	0.926975	1	FALSE
ACKR1	4.69902	-0.342993	0.236927	-1.44767	0.147709	1	FALSE
ACKR2	10.8197	-0.0771433	0.266489	-0.289481	0.772213	1	FALSE
ACKR3	7210.78	-0.0407613	0.236451	-0.172388	0.863133	1	FALSE
ACLY	13808.1	0.104335	0.260589	0.400384	0.688874	1	FALSE
ACMSD	0.200215	-0.043529	0.0747468	-0.582352	0.560329	1	FALSE
ACO1	2097.03	-0.130886	0.258612	-0.50611	0.612779	1	FALSE
ACO2	2795.82	0.0386528	0.262883	0.147034	0.883105	1	FALSE
ACOT1	22.7576	0.0588014	0.305438	0.192515	0.847339	1	FALSE
ACOT11	179.293	-0.0192338	0.294357	-0.0653418	0.947902	1	FALSE
ACOT12	8.32567	-0.398231	0.266472	-1.49445	0.135057	1	FALSE
ACOT13	769.229	0.0452383	0.262589	0.172278	0.863219	1	FALSE
ACOT2	78.807	0.057691	0.306112	0.188463	0.850513	1	FALSE
ACOT4	32.0629	-0.0737806	0.307773	-0.239724	0.810544	1	FALSE
ACOT6	0.344869	0	0.0747468	0	1	1	FALSE
ACOT7	1420.06	0.17018	0.301562	0.564327	0.572532	1	FALSE
ACOT8	826.228	0.16765	0.264959	0.632738	0.526905	1	FALSE
ACOT9	759.592	-0.0971028	0.249954	-0.388483	0.697659	1	FALSE
ACOX1	2285.23	-0.177626	0.231341	-0.767809	0.442601	1	FALSE
ACOX2	98.5006	-0.141034	0.288775	-0.488386	0.625277	1	FALSE
ACOX3	5951.55	0.0117453	0.243421	0.0482511	0.961516	1	FALSE
ACOXL	613.99	-0.0533766	0.23971	-0.222671	0.823792	1	FALSE
ACP1	2596.5	0.21317	0.227174	0.938355	0.348062	1	FALSE
ACP2	1254.95	-0.0895087	0.269212	-0.332484	0.739524	1	FALSE
ACP5	152.565	-0.357737	0.304167	-1.17612	0.239546	1	FALSE
ACP6	263.92	-0.217433	0.287689	-0.755792	0.449774	1	FALSE
ACPP	327.37	-0.0538737	0.272162	-0.197947	0.843087	1	FALSE
ACR	1.48951	0.0374188	0.129095	0.289854	0.771928	1	FALSE
ACRBP	21.4583	0.0684398	0.301671	0.226869	0.820526	1	FALSE
ACRC	107.916	0.184069	0.287133	0.641058	0.521485	1	FALSE
ACSBG1	2.59888	-0.00193344	0.193968	-0.00996782	0.992047	1	FALSE
ACSF2	1003.01	0.10216	0.263699	0.387411	0.698452	1	FALSE
ACSF3	552.724	-0.159801	0.242139	-0.659954	0.509283	1	FALSE
ACSL1	349.853	-0.571433	0.306217	-1.8661	0.0620271	1	FALSE
ACSL3	1629.66	0.0330819	0.24801	0.133389	0.893886	1	FALSE
ACSL4	1096.47	0.15089	0.271431	0.555905	0.578276	1	FALSE
ACSL6	1.18519	0.065143	0.12388	0.525858	0.598987	1	FALSE
ACSM1	0.25538	0.0427812	0.0747468	0.572348	0.567086	1	FALSE
ACSM3	7.4267	0.321976	0.260058	1.23809	0.215683	1	FALSE
ACSM4	136.784	-0.163093	0.289979	-0.562429	0.573824	1	FALSE
ACSM6	0.91505	-0.0406358	0.122026	-0.333009	0.739128	1	FALSE
ACSS1	1.63163	0.0264286	0.147376	0.179328	0.85768	1	FALSE
ACSS2	914.783	0.21838	0.253443	0.86165	0.38888	1	FALSE
ACSS3	2081.34	-0.0188836	0.238095	-0.0793111	0.936785	1	FALSE
ACTA1	104.394	-0.222054	0.307602	-0.721885	0.470365	1	FALSE
ACTA2	7.71015	-0.0764084	0.24463	-0.312343	0.75478	1	FALSE
ACTA2-AS1	0.355106	-0.043529	0.0747468	-0.582352	0.560329	1	FALSE
ACTB	104486	-0.00523505	0.302856	-0.0172856	0.986209	1	FALSE
ACTBP1	1.76756	-0.0753295	0.155547	-0.484289	0.628181	1	FALSE
ACTBP11	9.14376	0.349728	0.271315	1.28901	0.197394	1	FALSE
ACTBP12	0.355106	-0.043529	0.0747468	-0.582352	0.560329	1	FALSE
ACTBP14	0.5475	0.0176308	0.0774658	0.227595	0.819961	1	FALSE
ACTBP2	19.4588	0.191934	0.300541	0.638627	0.523065	1	FALSE
ACTBP7	2.91008	0.127433	0.199236	0.639605	0.522429	1	FALSE
ACTBP8	3.50786	0.0298933	0.218662	0.13671	0.89126	1	FALSE
ACTBP9	7.78363	0.0598004	0.25406	0.235378	0.813915	1	FALSE
ACTC1	541.259	-0.016181	0.303443	-0.0533248	0.957473	1	FALSE
ACTG1	181603	0.0798471	0.28845	0.276814	0.781923	1	FALSE
ACTG1P1	18.0526	-0.236578	0.30134	-0.785088	0.432402	1	FALSE
ACTG1P10	1.32385	-0.0253262	0.140868	-0.179786	0.85732	1	FALSE
ACTG1P12	2.44944	0.046552	0.183548	0.253624	0.799786	1	FALSE
ACTG1P14	17.6866	0.137709	0.281897	0.48851	0.625189	1	FALSE
ACTG1P15	1.21744	-0.0756914	0.137625	-0.549982	0.582332	1	FALSE
ACTG1P16	1.70019	0.0110403	0.15088	0.0731727	0.941669	1	FALSE
ACTG1P17	9.40057	-0.171213	0.271586	-0.630419	0.528421	1	FALSE
ACTG1P18	0.262677	0	0.0747468	0	1	1	FALSE
ACTG1P19	1.03829	-0.0427645	0.116149	-0.368185	0.712735	1	FALSE
ACTG1P20	12.5641	0.194706	0.285719	0.681458	0.495582	1	FALSE
ACTG1P21	1.12409	0.0268491	0.133141	0.201659	0.840184	1	FALSE
ACTG1P23	2.37806	-0.096801	0.16139	-0.599795	0.548643	1	FALSE
ACTG1P24	5.38397	-0.04837	0.243236	-0.198861	0.842372	1	FALSE
ACTG1P3	2.57041	0.000328678	0.181437	0.00181153	0.998555	1	FALSE
ACTG1P9	3.33123	-0.130358	0.198846	-0.655574	0.512098	1	FALSE
ACTG2	17.0713	-0.156785	0.280638	-0.558674	0.576384	1	FALSE
ACTL10	23.4636	-0.149896	0.301437	-0.497272	0.618997	1	FALSE
ACTL6A	1872.73	0.234209	0.233743	1.00199	0.316348	1	FALSE
ACTL6B	0.908778	-0.0686324	0.112784	-0.608531	0.542835	1	FALSE
ACTL7B	0.256049	-0.000373885	0.0747468	-0.00500202	0.996009	1	FALSE
ACTL8	0.96749	0.0235596	0.116209	0.202735	0.839342	1	FALSE
ACTN1	11511.7	0.0459597	0.266575	0.172408	0.863116	1	FALSE
ACTN1-AS1	3.32209	-0.108909	0.195354	-0.557496	0.577188	1	FALSE
ACTN2	19.3475	0.127105	0.295629	0.429949	0.667233	1	FALSE
ACTN3	589.583	-0.32182	0.288078	-1.11713	0.263941	1	FALSE
ACTN4	7646.28	0.0546979	0.268008	0.204091	0.838283	1	FALSE
ACTN4P1	0.809506	0.050081	0.109661	0.456688	0.647895	1	FALSE
ACTP1	0.253314	0	0.0747468	0	1	1	FALSE
ACTR10	1396.06	0.123369	0.255841	0.482209	0.629658	1	FALSE
ACTR1A	3931.7	0.125479	0.244229	0.513778	0.607407	1	FALSE
ACTR1B	2243.04	-0.00510804	0.219776	-0.023242	0.981457	1	FALSE
ACTR2	8416.9	0.00871902	0.271048	0.0321679	0.974338	1	FALSE
ACTR3	5993.19	0.0392188	0.221592	0.176986	0.859519	1	FALSE
ACTR3B	346.448	0.0962444	0.278365	0.345748	0.729532	1	FALSE
ACTR3C	4.20285	0.0564266	0.230942	0.244332	0.806974	1	FALSE
ACTR3P2	0.924723	-0.068136	0.122583	-0.555833	0.578325	1	FALSE
ACTR5	384.837	0.0578046	0.250901	0.230388	0.81779	1	FALSE
ACTR6	709.472	0.210036	0.274747	0.764472	0.444586	1	FALSE
ACTR8	676.431	0.00791098	0.249372	0.0317236	0.974692	1	FALSE
ACTRT1	1.08143	0.0281355	0.100251	0.280651	0.778978	1	FALSE
ACTRT3	96.3194	0.00962918	0.300988	0.031992	0.974478	1	FALSE
ACVR1	812.06	-0.17054	0.244621	-0.697161	0.485702	1	FALSE
ACVR1B	2411.77	-0.00980439	0.228215	-0.0429613	0.965732	1	FALSE
ACVR1C	20.4894	-0.169281	0.303195	-0.558324	0.576623	1	FALSE
ACVR2A	686.656	-0.160946	0.259544	-0.620111	0.535185	1	FALSE
ACVR2B	6206.79	-0.0823497	0.247069	-0.333306	0.738903	1	FALSE
ACVR2B-AS1	162.901	-0.0254304	0.266517	-0.0954172	0.923983	1	FALSE
ACVRL1	1.68925	0.0627813	0.139393	0.450391	0.652428	1	FALSE
ACY1	22.3763	-0.0225684	0.294322	-0.0766791	0.938879	1	FALSE
ACY3	0.642134	-0.000312426	0.100364	-0.00311292	0.997516	1	FALSE
ACYP1	88.6437	0.116513	0.280267	0.415721	0.677614	1	FALSE
ACYP2	117.718	0.0207303	0.288365	0.0718891	0.94269	1	FALSE
AD000684.2	8.82722	0.0423519	0.274805	0.154117	0.877518	1	FALSE
AD000864.6	8.08151	-0.0991401	0.265363	-0.373601	0.708701	1	FALSE
AD001527.4	6.95521	-0.138703	0.245233	-0.565596	0.571668	1	FALSE
ADA	391.885	0.0401156	0.298685	0.134307	0.89316	1	FALSE
ADAD2	2.53872	-0.0251126	0.170292	-0.147468	0.882763	1	FALSE
ADAL	246.3	-0.159581	0.263988	-0.6045	0.545511	1	FALSE
ADAM10	4903.86	0.0363073	0.259745	0.139781	0.888833	1	FALSE
ADAM11	85.6398	0.082945	0.307616	0.269638	0.787439	1	FALSE
ADAM12	21.7725	-0.16542	0.29635	-0.558194	0.576712	1	FALSE
ADAM15	223.536	-0.0983241	0.305118	-0.322249	0.747264	1	FALSE
ADAM17	2036.1	-0.138342	0.258461	-0.535253	0.592475	1	FALSE
ADAM18	1.46304	0.077491	0.149899	0.516954	0.605189	1	FALSE
ADAM19	12623.9	-0.282279	0.259095	-1.08948	0.275943	1	FALSE
ADAM2	5.79643	0.0225321	0.207971	0.108342	0.913724	1	FALSE
ADAM20	2.04341	0.12562	0.170846	0.735279	0.46217	1	FALSE
ADAM20P1	7.89177	-0.224779	0.26293	-0.854898	0.392607	1	FALSE
ADAM21	6.76274	-0.0056116	0.253115	-0.0221701	0.982312	1	FALSE
ADAM21P1	1.0672	-0.0376709	0.128419	-0.293344	0.769259	1	FALSE
ADAM22	154.292	-0.0416033	0.28688	-0.14502	0.884695	1	FALSE
ADAM23	593.135	0.148068	0.248091	0.59683	0.550621	1	FALSE
ADAM28	65.2574	-0.455356	0.303682	-1.49945	0.133757	1	FALSE
ADAM29	15.5194	0.0355932	0.292046	0.121875	0.902998	1	FALSE
ADAM32	2.81953	-0.159624	0.201051	-0.793946	0.427227	1	FALSE
ADAM33	49.0937	-0.0475077	0.307022	-0.154737	0.877029	1	FALSE
ADAM8	34.6143	0.0803269	0.307221	0.261463	0.793736	1	FALSE
ADAM9	804.661	-0.0881162	0.289994	-0.303855	0.761238	1	FALSE
ADAMTS1	747.831	0.100088	0.274863	0.364139	0.715754	1	FALSE
ADAMTS10	298.534	0.050675	0.288245	0.175805	0.860447	1	FALSE
ADAMTS12	1622.53	-0.0363161	0.306186	-0.118608	0.905586	1	FALSE
ADAMTS13	561.792	-0.291645	0.294028	-0.991894	0.321249	1	FALSE
ADAMTS14	8.4022	-0.00701664	0.272705	-0.0257298	0.979473	1	FALSE
ADAMTS15	54.2937	0.210641	0.30491	0.69083	0.489672	1	FALSE
ADAMTS16	174.332	0.430804	0.291342	1.47869	0.139224	1	FALSE
ADAMTS17	22.4829	0.0410204	0.276902	0.148141	0.882232	1	FALSE
ADAMTS18	1877.14	0.0255254	0.303322	0.0841526	0.932935	1	FALSE
ADAMTS19	645.953	0.132414	0.277279	0.47755	0.632971	1	FALSE
ADAMTS19-AS1	22.5087	-0.087996	0.307024	-0.286609	0.774412	1	FALSE
ADAMTS2	322.901	0.373405	0.278469	1.34092	0.179946	1	FALSE
ADAMTS20	120.114	0.0826614	0.238385	0.346756	0.728774	1	FALSE
ADAMTS3	107.002	0.160041	0.288856	0.55405	0.579545	1	FALSE
ADAMTS4	116.635	-0.0467562	0.283075	-0.165173	0.868808	1	FALSE
ADAMTS5	284.583	-0.178423	0.299255	-0.596225	0.551025	1	FALSE
ADAMTS6	53.7804	-0.0581352	0.306544	-0.189647	0.849586	1	FALSE
ADAMTS7	1137.93	-0.029298	0.280014	-0.104631	0.916669	1	FALSE
ADAMTS7P1	11.8958	-0.170239	0.277326	-0.613858	0.539309	1	FALSE
ADAMTS7P3	20.0399	-0.304307	0.302376	-1.00639	0.31423	1	FALSE
ADAMTS7P4	0.401267	0.0212037	0.0747468	0.283673	0.776661	1	FALSE
ADAMTS8	971.094	0.0981798	0.251916	0.389732	0.696735	1	FALSE
ADAMTS9	358.301	-0.384187	0.298763	-1.28593	0.198469	1	FALSE
ADAMTS9-AS2	9.22281	-0.0389421	0.26142	-0.148964	0.881582	1	FALSE
ADAMTSL1	39.7698	0.297939	0.305487	0.975292	0.329415	1	FALSE
ADAMTSL2	5.92328	0.0806731	0.231884	0.347902	0.727913	1	FALSE
ADAMTSL3	44.7724	-0.109159	0.303224	-0.359995	0.718851	1	FALSE
ADAMTSL4	108.055	-0.386978	0.28961	-1.3362	0.181482	1	FALSE
ADAMTSL4-AS1	5.15332	-0.212652	0.219853	-0.967248	0.33342	1	FALSE
ADAMTSL5	49.2134	0.0131507	0.307211	0.0428068	0.965856	1	FALSE
ADAP1	40.2998	-0.123706	0.301355	-0.410498	0.681441	1	FALSE
ADAP2	19.1213	-0.276807	0.299831	-0.923211	0.355897	1	FALSE
ADAR	9544.04	-0.0444907	0.250089	-0.177899	0.858802	1	FALSE
ADARB1	354.48	-0.0871331	0.255717	-0.34074	0.733299	1	FALSE
ADARB2	28.7056	0.168579	0.307736	0.547805	0.583826	1	FALSE
ADAT1	427.49	-0.0967574	0.241872	-0.400036	0.68913	1	FALSE
ADAT2	187.199	-0.132769	0.29433	-0.451089	0.651925	1	FALSE
ADAT3	152.312	-0.0288763	0.29799	-0.0969035	0.922803	1	FALSE
ADCK1	108.455	-0.0263326	0.307771	-0.0855591	0.931817	1	FALSE
ADCK2	560.343	-0.0193356	0.260217	-0.0743055	0.940767	1	FALSE
ADCK5	282.904	0.0568367	0.281436	0.201952	0.839954	1	FALSE
ADCY1	531.155	0.0643748	0.279559	0.230273	0.81788	1	FALSE
ADCY10	85.6373	-0.268986	0.307906	-0.873595	0.382339	1	FALSE
ADCY10P1	97.915	-0.0141413	0.288993	-0.048933	0.960973	1	FALSE
ADCY2	1774.7	-0.0247855	0.265813	-0.093244	0.92571	1	FALSE
ADCY3	516.825	0.162503	0.262416	0.619258	0.535747	1	FALSE
ADCY4	1.91772	0.093163	0.171338	0.543738	0.586622	1	FALSE
ADCY5	369.853	-0.0350482	0.263953	-0.132782	0.894366	1	FALSE
ADCY6	1604.68	-0.222738	0.29284	-0.760613	0.446888	1	FALSE
ADCY7	519.032	-0.112998	0.296788	-0.380737	0.703398	1	FALSE
ADCY8	502.824	-0.00865741	0.286764	-0.03019	0.975916	1	FALSE
ADCY9	176.15	-0.169629	0.293403	-0.578143	0.563167	1	FALSE
ADCYAP1	0.405828	0	0.0747468	0	1	1	FALSE
ADCYAP1R1	79.9145	0.451143	0.299486	1.50639	0.131967	1	FALSE
ADD1	9835.52	-0.10137	0.233853	-0.433478	0.664668	1	FALSE
ADD2	749.332	-0.0549762	0.274898	-0.199987	0.841491	1	FALSE
ADD3	3925.94	0.0189575	0.280564	0.0675694	0.946128	1	FALSE
ADD3-AS1	10.4349	0.150075	0.283723	0.528948	0.596841	1	FALSE
ADGB	1.23013	-0.0389978	0.13629	-0.286138	0.774772	1	FALSE
ADGRA1	199.225	-0.00130029	0.304404	-0.00427159	0.996592	1	FALSE
ADGRA1-AS1	52.2267	-0.0361388	0.302245	-0.119568	0.904826	1	FALSE
ADGRA2	11.675	0.0356583	0.265124	0.134497	0.89301	1	FALSE
ADGRA3	2526.96	0.0782712	0.238434	0.328272	0.742706	1	FALSE
ADGRB1	284.217	0.0476668	0.305341	0.15611	0.875946	1	FALSE
ADGRB2	630.591	-0.083802	0.238578	-0.351256	0.725396	1	FALSE
ADGRB3	12.861	0.107654	0.294083	0.366068	0.714314	1	FALSE
ADGRD1	16.3027	0.249764	0.299151	0.834909	0.403769	1	FALSE
ADGRD2	1.41141	-0.0709527	0.135861	-0.522247	0.601499	1	FALSE
ADGRE2	1.53005	0.0385323	0.134798	0.285852	0.774991	1	FALSE
ADGRE5	54.9322	-0.0207666	0.307908	-0.0674443	0.946228	1	FALSE
ADGRF2	207.785	-0.0625103	0.295766	-0.21135	0.832614	1	FALSE
ADGRF3	4.90484	-0.147948	0.231308	-0.639615	0.522423	1	FALSE
ADGRF4	124.861	-0.236261	0.297843	-0.793238	0.427639	1	FALSE
ADGRF5	0.539613	-0.0183035	0.0786223	-0.232803	0.815914	1	FALSE
ADGRF5P1	5.25537	-0.0440316	0.230166	-0.191303	0.848288	1	FALSE
ADGRG1	15.6843	0.204327	0.293916	0.695188	0.486937	1	FALSE
ADGRG2	1206.43	0.255058	0.253212	1.00729	0.313796	1	FALSE
ADGRG3	2.86589	0.0310803	0.189889	0.163676	0.869986	1	FALSE
ADGRG5	62.7604	0.0107469	0.307604	0.0349375	0.97213	1	FALSE
ADGRG6	95.4016	-0.308064	0.307576	-1.00159	0.316544	1	FALSE
ADGRG7	37.5313	-0.267521	0.300494	-0.89027	0.373321	1	FALSE
ADGRL1	2722.05	-0.0109174	0.283371	-0.038527	0.969268	1	FALSE
ADGRL2	2668.98	0.0699943	0.24592	0.284622	0.775934	1	FALSE
ADGRL3	235.721	0.0472937	0.25619	0.184604	0.85354	1	FALSE
ADGRL4	0.557554	0.0654381	0.0789654	0.828693	0.407278	1	FALSE
ADGRV1	1146.21	0.0784603	0.307077	0.255507	0.798332	1	FALSE
ADH5	6913.98	0.251209	0.236921	1.06031	0.289005	1	FALSE
ADH5P2	0.848416	0	0.104236	0	1	1	FALSE
ADH5P3	2.17499	0.0233158	0.177723	0.131192	0.895624	1	FALSE
ADH5P4	33.8504	0.314982	0.307846	1.02318	0.306224	1	FALSE
ADH6	1.01905	-0.0442942	0.13392	-0.330751	0.740833	1	FALSE
ADHFE1	91.6631	-0.208985	0.299899	-0.696852	0.485895	1	FALSE
ADI1	1805.93	0.0623421	0.259602	0.240145	0.810218	1	FALSE
ADIPOQ	0.460503	-0.0186664	0.0752979	-0.2479	0.804212	1	FALSE
ADIPOR1	3206.25	0.0800018	0.233159	0.343121	0.731507	1	FALSE
ADIPOR1P2	0.814031	-0.0311506	0.100881	-0.308784	0.757486	1	FALSE
ADIPOR2	3186.07	-0.0127293	0.265131	-0.0480115	0.961707	1	FALSE
ADIRF	1.18091	-0.0871986	0.103637	-0.841388	0.400131	1	FALSE
ADIRF-AS1	123.856	-0.190547	0.30387	-0.627067	0.530615	1	FALSE
ADK	553.275	-0.0866608	0.244226	-0.354839	0.72271	1	FALSE
ADM	517.797	0.0562656	0.306945	0.183308	0.854556	1	FALSE
ADM2	626.847	-0.23493	0.277649	-0.846137	0.397476	1	FALSE
ADM5	36.3157	0.246124	0.303656	0.810536	0.417632	1	FALSE
ADNP	6397.3	0.0314013	0.227978	0.137739	0.890447	1	FALSE
ADNP-AS1	20.9024	-0.0889562	0.305275	-0.291397	0.770748	1	FALSE
ADNP2	2392.89	0.104984	0.232369	0.451799	0.651414	1	FALSE
ADO	1132.61	0.00757805	0.244502	0.0309938	0.975274	1	FALSE
ADORA1	200.776	0.247117	0.306808	0.805446	0.420562	1	FALSE
ADORA2A	3.31509	-0.173689	0.196031	-0.886027	0.375603	1	FALSE
ADORA2A-AS1	1.90091	0.212057	0.129763	1.63419	0.10222	1	FALSE
ADORA2B	32.0076	0.169197	0.29885	0.566159	0.571286	1	FALSE
ADPGK	3188.45	-0.0236544	0.264973	-0.0892708	0.928867	1	FALSE
ADPGK-AS1	10.8914	-0.260294	0.272676	-0.95459	0.339785	1	FALSE
ADPRH	415.343	-0.0673598	0.285164	-0.236215	0.813266	1	FALSE
ADPRHL1	30.137	0.0291442	0.306773	0.0950024	0.924313	1	FALSE
ADPRHL2	895.114	0.108204	0.266846	0.405492	0.685116	1	FALSE
ADPRM	137.546	0.0465425	0.280292	0.16605	0.868117	1	FALSE
ADRA1A	4.74548	0.0602532	0.202659	0.297312	0.766228	1	FALSE
ADRA1B	1.64944	0.0708466	0.155716	0.454972	0.649129	1	FALSE
ADRA1D	2.02607	-0.0803947	0.157493	-0.510465	0.609726	1	FALSE
ADRA2A	103.369	0.0309032	0.306425	0.100851	0.919669	1	FALSE
ADRA2B	61.0193	0.409087	0.301114	1.35858	0.17428	1	FALSE
ADRA2C	1008.77	0.0776752	0.285671	0.271905	0.785695	1	FALSE
ADRB1	1.16394	0.0803564	0.132069	0.608441	0.542895	1	FALSE
ADRB2	11.8253	-0.0122385	0.285675	-0.0428408	0.965828	1	FALSE
ADRB3	1.71001	-0.0883937	0.159126	-0.555495	0.578556	1	FALSE
ADRM1	3368.04	0.134199	0.288217	0.465617	0.64149	1	FALSE
ADSL	3619.7	0.241504	0.250472	0.964193	0.334949	1	FALSE
ADSS	1109.05	0.0876207	0.27525	0.318332	0.750233	1	FALSE
ADSSL1	177.615	0.0749351	0.287442	0.260696	0.794327	1	FALSE
ADTRP	1.7977	-0.0452942	0.148052	-0.305934	0.759655	1	FALSE
AE000658.25	9.52485	-0.214374	0.261987	-0.818263	0.413207	1	FALSE
AE000661.37	17.3477	0.23473	0.297047	0.790212	0.429404	1	FALSE
AEBP1	2122.36	-0.0393026	0.284804	-0.137999	0.890241	1	FALSE
AEBP2	674.338	0.0200604	0.244141	0.0821673	0.934514	1	FALSE
AEN	2513.88	-0.27034	0.274672	-0.98423	0.325002	1	FALSE
AES	15772.3	-0.0217568	0.286568	-0.0759218	0.939481	1	FALSE
AF001548.5	5.24713	-0.0790043	0.215877	-0.36597	0.714388	1	FALSE
AF001548.6	0.200215	-0.043529	0.0747468	-0.582352	0.560329	1	FALSE
AF003625.3	1.77469	0.0375411	0.156149	0.240418	0.810006	1	FALSE
AF011889.2	3.40243	-0.161671	0.200579	-0.80602	0.420231	1	FALSE
AF011889.5	9.55659	-0.155363	0.222159	-0.699333	0.484344	1	FALSE
AF013593.1	0.542695	-0.0219934	0.0867773	-0.253446	0.799923	1	FALSE
AF038458.3	1.36328	0.0806239	0.105859	0.761619	0.446287	1	FALSE
AF064858.10	8.70753	0.0419014	0.261236	0.160397	0.872569	1	FALSE
AF064858.11	2.10718	-0.10305	0.161614	-0.637631	0.523714	1	FALSE
AF064858.6	2.19273	-0.0777408	0.156057	-0.498156	0.618374	1	FALSE
AF064858.7	0.301157	0.0212037	0.0747468	0.283673	0.776661	1	FALSE
AF064858.8	2.55154	-0.263585	0.186991	-1.40961	0.158654	1	FALSE
AF064860.5	0.369759	0	0.0747468	0	1	1	FALSE
AF064860.7	4.48039	0.0257467	0.224671	0.114597	0.908764	1	FALSE
AF067845.1	2.39254	-0.123107	0.150353	-0.818787	0.412908	1	FALSE
AF067845.2	1.24946	0	0.107813	0	1	1	FALSE
AF067845.3	0.939157	-0.0397736	0.105914	-0.375526	0.707269	1	FALSE
AF121897.4	0.445322	0.00250245	0.0752267	0.0332655	0.973463	1	FALSE
AF127577.12	0.254999	-0.0219514	0.0747468	-0.293677	0.769005	1	FALSE
AF127936.7	2.36963	0.010508	0.164553	0.0638576	0.949084	1	FALSE
AF127936.9	22.3505	0.350556	0.306791	1.14265	0.253182	1	FALSE
AF129075.5	2.368	-0.107178	0.15969	-0.671164	0.502116	1	FALSE
AF129408.17	0.652859	0.0386343	0.0912826	0.423239	0.672121	1	FALSE
AF131215.2	263.997	-0.222474	0.302054	-0.736537	0.461404	1	FALSE
AF131215.3	3.64391	-0.226217	0.179355	-1.26128	0.207208	1	FALSE
AF131215.4	1.77851	-0.105197	0.138756	-0.758145	0.448364	1	FALSE
AF131215.6	0.250578	0.0212037	0.0747468	0.283673	0.776661	1	FALSE
AF131215.8	31.8969	-0.247764	0.307761	-0.805054	0.420789	1	FALSE
AF131215.9	152.515	-0.187606	0.265468	-0.706699	0.479754	1	FALSE
AF131216.1	27.9373	-0.072558	0.305054	-0.237853	0.811995	1	FALSE
AF131216.5	4.11767	0.139778	0.214685	0.651083	0.514993	1	FALSE
AF131216.6	0.350017	0.0427812	0.0747468	0.572348	0.567086	1	FALSE
AF131217.1	5.65679	-0.0701622	0.221746	-0.316408	0.751693	1	FALSE
AF146191.4	10.1054	0.243452	0.280422	0.868162	0.385306	1	FALSE
AF165138.7	2.42698	0.112076	0.17852	0.627807	0.53013	1	FALSE
AF186192.5	0.254999	-0.0219514	0.0747468	-0.293677	0.769005	1	FALSE
AF196970.3	0.873832	-0.0575073	0.120912	-0.475612	0.634351	1	FALSE
AF196972.4	0.44911	0.036737	0.0752345	0.4883	0.625337	1	FALSE
AF196972.9	1.53222	0.136587	0.149941	0.910939	0.362327	1	FALSE
AF230666.2	0.262677	0	0.0747468	0	1	1	FALSE
AFAP1	1323.23	-0.0730538	0.263785	-0.276945	0.781823	1	FALSE
AFAP1-AS1	0.298985	0.0212037	0.0747468	0.283673	0.776661	1	FALSE
AFAP1L1	42.9395	-0.304365	0.307362	-0.990247	0.322053	1	FALSE
AFAP1L2	24.6315	-0.0803815	0.307468	-0.26143	0.793761	1	FALSE
AFDN	7595.83	-0.0455947	0.273312	-0.166823	0.86751	1	FALSE
AFDN-AS1	65.3915	-0.39099	0.299726	-1.30449	0.192066	1	FALSE
AFF1	4820.15	-0.134108	0.295282	-0.454172	0.649705	1	FALSE
AFF2	41.5028	-0.0514617	0.30384	-0.169371	0.865505	1	FALSE
AFF3	27.9698	0.188816	0.29894	0.631618	0.527636	1	FALSE
AFF4	6901.86	-0.0807344	0.283037	-0.285244	0.775457	1	FALSE
AFG3L1P	593.875	-0.24993	0.285284	-0.876075	0.380989	1	FALSE
AFG3L2	2485.11	0.0727614	0.231572	0.314206	0.753365	1	FALSE
AFG3L2P1	0.801863	0.0725615	0.108303	0.669989	0.502865	1	FALSE
AFM	0.293514	0.0427812	0.0747468	0.572348	0.567086	1	FALSE
AFMID	498.835	-0.0910572	0.264971	-0.34365	0.731109	1	FALSE
AFP	93.7624	-0.0411609	0.298604	-0.137844	0.890364	1	FALSE
AFTPH	583.306	0.0291237	0.260157	0.111947	0.910866	1	FALSE
AGA	504.163	0.130665	0.24904	0.524674	0.59981	1	FALSE
AGAP1	1007.92	-0.0188461	0.254586	-0.0740265	0.940989	1	FALSE
AGAP1-IT1	2.30075	0.127432	0.180265	0.706914	0.47962	1	FALSE
AGAP10P	1.27952	-0.126556	0.140334	-0.901823	0.367151	1	FALSE
AGAP12P	0.6421	-0.0256507	0.0819678	-0.312937	0.754329	1	FALSE
AGAP13P	8.04743	-0.42804	0.26485	-1.61616	0.10606	1	FALSE
AGAP2	4.93377	0.0499141	0.204371	0.244233	0.80705	1	FALSE
AGAP2-AS1	2.33281	-0.132877	0.147751	-0.89933	0.368477	1	FALSE
AGAP3	1552.25	0.0847991	0.289756	0.292657	0.769784	1	FALSE
AGAP4	46.8211	-0.194941	0.307272	-0.634424	0.525804	1	FALSE
AGAP5	2.63042	-0.101169	0.18756	-0.539393	0.589615	1	FALSE
AGAP6	129.765	-0.338154	0.283703	-1.19193	0.233288	1	FALSE
AGAP7P	62.1146	-0.268149	0.296498	-0.90439	0.365789	1	FALSE
AGAP9	67.9037	-0.308822	0.307263	-1.00507	0.314861	1	FALSE
AGBL1	6.14547	-0.00532673	0.235503	-0.0226185	0.981955	1	FALSE
AGBL2	56.0275	0.143845	0.307486	0.467812	0.639919	1	FALSE
AGBL3	51.0986	0.0624377	0.302205	0.206607	0.836317	1	FALSE
AGBL4	54.5338	-0.180213	0.307836	-0.58542	0.558265	1	FALSE
AGBL5	2474.48	0.0645252	0.250888	0.257188	0.797034	1	FALSE
AGBL5-AS1	0.614238	-0.0150596	0.0807634	-0.186466	0.852079	1	FALSE
AGBL5-IT1	0.456753	0.0215952	0.081814	0.263955	0.791814	1	FALSE
AGER	349.843	-0.209393	0.293071	-0.71448	0.474931	1	FALSE
AGFG1	2132.77	-0.0277234	0.241052	-0.11501	0.908437	1	FALSE
AGFG2	1630.09	-0.142666	0.253524	-0.562731	0.573618	1	FALSE
AGGF1	1196.57	0.0775359	0.254177	0.305046	0.760331	1	FALSE
AGGF1P3	2.4704	0.029951	0.178804	0.167507	0.866971	1	FALSE
AGK	656.116	0.0268028	0.241984	0.110763	0.911805	1	FALSE
AGKP1	0.423039	-0.0219514	0.0747468	-0.293677	0.769005	1	FALSE
AGL	1109.35	-0.107808	0.273823	-0.393714	0.693792	1	FALSE
AGMAT	104.578	0.0270018	0.293335	0.0920512	0.926657	1	FALSE
AGMO	20.6759	-0.0590578	0.30467	-0.193842	0.8463	1	FALSE
AGO1	2559.57	-0.0586075	0.248191	-0.236138	0.813325	1	FALSE
AGO2	3581.15	-0.0822166	0.278816	-0.294878	0.768087	1	FALSE
AGO3	643.394	-0.146654	0.265136	-0.553129	0.580175	1	FALSE
AGO4	1097.36	-0.0903934	0.280288	-0.322502	0.747073	1	FALSE
AGPAT1	5435.32	-0.0784116	0.277969	-0.282087	0.777876	1	FALSE
AGPAT2	960.628	-0.0102674	0.287939	-0.0356581	0.971555	1	FALSE
AGPAT3	2778.47	0.0194395	0.260445	0.0746397	0.940501	1	FALSE
AGPAT4	3352.26	-0.0425969	0.255383	-0.166796	0.867531	1	FALSE
AGPAT4-IT1	107.936	-0.484403	0.303641	-1.59532	0.110641	1	FALSE
AGPAT5	1788.96	0.18554	0.251642	0.737318	0.460929	1	FALSE
AGPS	2995.41	0.0139268	0.258399	0.0538963	0.957018	1	FALSE
AGR2	0.906176	0.0466417	0.0924386	0.504569	0.613861	1	FALSE
AGR3	0.646697	0	0.0842304	0	1	1	FALSE
AGRN	5735.91	-0.109466	0.263368	-0.41564	0.677673	1	FALSE
AGT	1.41302	0.0287345	0.158977	0.180746	0.856567	1	FALSE
AGTPBP1	2005.81	0.0832252	0.275143	0.30248	0.762287	1	FALSE
AGTR1	1.39198	-0.0317578	0.128874	-0.246426	0.805352	1	FALSE
AGTRAP	1406.15	0.0953581	0.289137	0.329803	0.741549	1	FALSE
AGXT	1.07316	-0.00109968	0.129712	-0.00847789	0.993236	1	FALSE
AGXT2	0.201718	0	0.0747468	0	1	1	FALSE
AHCTF1	980.862	0.00521534	0.264193	0.0197406	0.98425	1	FALSE
AHCY	10160.8	0.201527	0.264481	0.761971	0.446077	1	FALSE
AHCYL1	2975.48	-0.0249251	0.225425	-0.110569	0.911958	1	FALSE
AHCYL2	931.377	0.0502279	0.237205	0.211749	0.832303	1	FALSE
AHCYP2	0.313602	0.0212037	0.0747468	0.283673	0.776661	1	FALSE
AHCYP4	1.17821	0.0464857	0.13162	0.353182	0.723952	1	FALSE
AHCYP5	0.263023	0.0212037	0.0747468	0.283673	0.776661	1	FALSE
AHCYP7	0.306594	-0.0219514	0.0747468	-0.293677	0.769005	1	FALSE
AHDC1	1112.59	0.0567685	0.287526	0.197438	0.843485	1	FALSE
AHI1	380.873	-0.192993	0.281967	-0.684454	0.493688	1	FALSE
AHNAK	10492.2	-0.173786	0.307692	-0.564805	0.572207	1	FALSE
AHNAK2	48.8185	0.12363	0.306894	0.402845	0.687062	1	FALSE
AHR	33.2709	-0.157697	0.307134	-0.513445	0.60764	1	FALSE
AHRR	25.2212	0.0475922	0.306401	0.155326	0.876564	1	FALSE
AHSA1	2921.41	0.2561	0.251743	1.01731	0.309008	1	FALSE
AHSA2	2112.09	-0.302469	0.307107	-0.984897	0.324675	1	FALSE
AHSG	0.453529	-0.0368827	0.0752926	-0.489858	0.624235	1	FALSE
AHSP	0.24634	-0.0219514	0.0747468	-0.293677	0.769005	1	FALSE
AICDA	0.949324	0.00772639	0.107251	0.0720403	0.94257	1	FALSE
AIDA	650.038	0.0864822	0.276076	0.313255	0.754087	1	FALSE
AIF1	16.9091	0.0246603	0.29322	0.0841016	0.932976	1	FALSE
AIF1L	6104.72	0.125756	0.22251	0.565168	0.57196	1	FALSE
AIFM1	1667.67	0.103481	0.232431	0.445211	0.656167	1	FALSE
AIFM2	248.027	0.00884919	0.273829	0.0323165	0.97422	1	FALSE
AIFM3	18.2437	0.0678065	0.302295	0.224306	0.822519	1	FALSE
AIG1	142.366	-0.0542311	0.282424	-0.19202	0.847726	1	FALSE
AIM1	16.2594	0.00574693	0.290179	0.0198047	0.984199	1	FALSE
AIM1L	53.6772	0.101757	0.30616	0.332366	0.739613	1	FALSE
AIM2	58.002	-0.131282	0.306355	-0.428529	0.668266	1	FALSE
AIMP1	1054.09	0.0563858	0.235114	0.239824	0.810467	1	FALSE
AIMP1P1	0.199546	-0.000373885	0.0747468	-0.00500202	0.996009	1	FALSE
AIMP2	1328.81	0.121223	0.286617	0.422946	0.672334	1	FALSE
AIP	884.56	0.1922	0.301608	0.637249	0.523963	1	FALSE
AIPL1	0.701025	-0.0123238	0.0953783	-0.12921	0.897191	1	FALSE
AIRE	216.22	-0.301792	0.302014	-0.999263	0.317667	1	FALSE
AJ003147.9	1.22697	0.0717191	0.137294	0.522378	0.601407	1	FALSE
AJ011931.1	0.198878	0.0427812	0.0747468	0.572348	0.567086	1	FALSE
AJ011932.1	65.6506	-0.0146123	0.306882	-0.0476154	0.962023	1	FALSE
AJAP1	2008.4	-0.0679073	0.264849	-0.2564	0.797642	1	FALSE
AJUBA	963.074	-0.0430566	0.267077	-0.161214	0.871925	1	FALSE
AK1	52.276	-0.0417416	0.305509	-0.13663	0.891323	1	FALSE
AK2	1078.96	0.0224388	0.249534	0.0899227	0.928349	1	FALSE
AK3	1711.21	-0.0648806	0.228188	-0.284329	0.776158	1	FALSE
AK3P3	8.33016	0.00227661	0.268583	0.00847639	0.993237	1	FALSE
AK4	5608.12	0.00830426	0.295958	0.0280589	0.977615	1	FALSE
AK4P1	0.977651	0.0295637	0.108134	0.2734	0.784546	1	FALSE
AK4P3	0.253314	0	0.0747468	0	1	1	FALSE
AK4P6	0.250578	0.0212037	0.0747468	0.283673	0.776661	1	FALSE
AK5	4.71526	-0.0352666	0.237556	-0.148456	0.881983	1	FALSE
AK6	439.315	0.222855	0.247037	0.902111	0.366998	1	FALSE
AK6P1	0.194076	0.0212037	0.0747468	0.283673	0.776661	1	FALSE
AK7	68.3913	0.0143279	0.29256	0.0489743	0.96094	1	FALSE
AK8	65.2953	-0.0927575	0.303152	-0.305977	0.759622	1	FALSE
AK9	42.0803	-0.157049	0.307885	-0.510091	0.609988	1	FALSE
AKAIN1	0.194744	-0.0219514	0.0747468	-0.293677	0.769005	1	FALSE
AKAP1	951.894	-0.25381	0.232149	-1.09331	0.274259	1	FALSE
AKAP10	1035.18	0.00763091	0.269725	0.0282915	0.97743	1	FALSE
AKAP11	962.729	-0.0266107	0.287879	-0.0924369	0.926351	1	FALSE
AKAP12	1995.51	0.0155257	0.250115	0.0620743	0.950504	1	FALSE
AKAP13	4860.41	-0.00453747	0.280894	-0.0161537	0.987112	1	FALSE
AKAP14	0.453876	0.014948	0.0752608	0.198615	0.842564	1	FALSE
AKAP17A	2193.89	-0.0566886	0.243565	-0.232746	0.815959	1	FALSE
AKAP17BP	17.011	-0.0558479	0.290564	-0.192205	0.847582	1	FALSE
AKAP2	0.515991	0	0.0768496	0	1	1	FALSE
AKAP3	14.6445	-0.0119407	0.272135	-0.0438781	0.965002	1	FALSE
AKAP4	0.259801	-0.000373885	0.0747468	-0.00500202	0.996009	1	FALSE
AKAP5	52.7159	0.0828294	0.304549	0.271974	0.785642	1	FALSE
AKAP6	179.586	0.0613565	0.286179	0.214399	0.830236	1	FALSE
AKAP7	179.832	-0.0687306	0.269307	-0.255212	0.798559	1	FALSE
AKAP8	1187.25	-0.0657169	0.239479	-0.274417	0.783764	1	FALSE
AKAP8L	3301.21	-0.10487	0.256519	-0.408819	0.682672	1	FALSE
AKAP9	2583.44	-0.146021	0.272205	-0.536436	0.591657	1	FALSE
AKIP1	541.521	-0.0482647	0.240386	-0.20078	0.840871	1	FALSE
AKIRIN1	5209.31	-0.00653821	0.241481	-0.0270755	0.9784	1	FALSE
AKIRIN2	1424.57	0.0123268	0.292241	0.0421801	0.966355	1	FALSE
AKIRIN2P1	0.562298	-0.0524514	0.0872949	-0.600853	0.547938	1	FALSE
AKNA	373.329	-0.117308	0.26631	-0.440493	0.65958	1	FALSE
AKNAD1	17.4391	0.0776206	0.291994	0.26583	0.79037	1	FALSE
AKR1A1	2746.99	0.060354	0.257117	0.234733	0.814416	1	FALSE
AKR1B1	5515.02	-0.120036	0.216366	-0.554784	0.579043	1	FALSE
AKR1B10	1.46512	-0.0464125	0.117787	-0.394037	0.693553	1	FALSE
AKR1B1P1	0.973271	-0.0320106	0.133301	-0.240138	0.810223	1	FALSE
AKR1B1P2	0.958404	-0.0283852	0.10368	-0.273778	0.784255	1	FALSE
AKR1B1P3	0.976987	-0.10072	0.117036	-0.860597	0.38946	1	FALSE
AKR1B1P6	0.194744	-0.0219514	0.0747468	-0.293677	0.769005	1	FALSE
AKR1B1P7	0.70277	0.0874364	0.104552	0.836292	0.402991	1	FALSE
AKR1C1	7.21238	-0.150431	0.260995	-0.576377	0.564361	1	FALSE
AKR1C2	1.38649	-0.0745478	0.133394	-0.558855	0.576261	1	FALSE
AKR1C3	49.7593	0.2774	0.306787	0.904209	0.365884	1	FALSE
AKR1C7P	0.462536	-0.000373885	0.0747468	-0.00500202	0.996009	1	FALSE
AKR1C8P	1.75139	0.108711	0.150874	0.720542	0.471191	1	FALSE
AKR1D1	0.316303	-0.000373885	0.0747468	-0.00500202	0.996009	1	FALSE
AKR1E2	16.4427	0.0803798	0.298571	0.269215	0.787764	1	FALSE
AKR7A2	911.791	0.139779	0.281345	0.496826	0.619312	1	FALSE
AKR7A2P1	0.294183	-0.000373885	0.0747468	-0.00500202	0.996009	1	FALSE
AKR7A3	15.0858	-0.118128	0.298409	-0.395859	0.692209	1	FALSE
AKR7L	13.1374	-0.0929264	0.277453	-0.334927	0.73768	1	FALSE
AKT1	4830.66	0.0986242	0.264944	0.372246	0.70971	1	FALSE
AKT1S1	2175.53	-0.00293766	0.294561	-0.00997302	0.992043	1	FALSE
AKT2	5040.38	-0.0439001	0.233082	-0.188346	0.850605	1	FALSE
AKT3	709.935	-0.133999	0.251754	-0.53226	0.594546	1	FALSE
AKT3-IT1	0.200215	-0.043529	0.0747468	-0.582352	0.560329	1	FALSE
AKTIP	213.616	-0.00697982	0.265662	-0.0262733	0.979039	1	FALSE
AL008723.1	6.30443	0.0586912	0.24588	0.238698	0.81134	1	FALSE
AL022237.3	0.916065	-0.0501719	0.115138	-0.435756	0.663014	1	FALSE
AL022341.3	10.246	0.112966	0.27418	0.412016	0.680328	1	FALSE
AL022344.7	0.583401	-0.0479137	0.0790854	-0.605847	0.544616	1	FALSE
AL022393.9	10.3998	-0.0850807	0.272394	-0.312344	0.754779	1	FALSE
AL023806.1	5.99097	0.0821129	0.23566	0.348438	0.727511	1	FALSE
AL035610.1	14.4414	0.0877927	0.297155	0.295444	0.767654	1	FALSE
AL035610.2	0.782763	-0.00964184	0.0981009	-0.0982848	0.921706	1	FALSE
AL049794.1	1.15466	-0.0571948	0.102834	-0.556186	0.578084	1	FALSE
AL109767.1	0.683854	-0.0534494	0.0942652	-0.56701	0.570707	1	FALSE
AL121578.2	1.11417	0.0427549	0.122862	0.347992	0.727846	1	FALSE
AL132709.1	169.775	-0.250398	0.30734	-0.814727	0.415229	1	FALSE
AL133168.3	0.511429	0.0440054	0.0766756	0.573917	0.566024	1	FALSE
AL133243.1	10.9225	-0.265081	0.284569	-0.931516	0.351587	1	FALSE
AL133243.2	11.0236	-0.232163	0.284664	-0.815567	0.414748	1	FALSE
AL133243.4	0.656611	0.0247011	0.100609	0.245515	0.806058	1	FALSE
AL133245.2	0.355142	-0.000373885	0.0747468	-0.00500202	0.996009	1	FALSE
AL133493.2	10.7321	-0.0942273	0.276977	-0.340199	0.733707	1	FALSE
AL135787.1	0.250578	0.0212037	0.0747468	0.283673	0.776661	1	FALSE
AL136419.6	14.9169	-0.352072	0.292693	-1.20287	0.229025	1	FALSE
AL157871.2	1.02637	-0.00114301	0.125921	-0.0090772	0.992758	1	FALSE
AL161668.5	2.68146	-0.0460333	0.184443	-0.249581	0.802912	1	FALSE
AL163953.3	59.7498	0.198881	0.30553	0.650937	0.515087	1	FALSE
AL354828.1	0.296355	0	0.0747468	0	1	1	FALSE
AL355480.1	1.28609	0.037887	0.139934	0.270748	0.786585	1	FALSE
AL356053.1	3.63587	-0.1943	0.211734	-0.917659	0.358797	1	FALSE
AL356585.1	0.357314	0	0.0747468	0	1	1	FALSE
AL357140.1	0.198878	0.0427812	0.0747468	0.572348	0.567086	1	FALSE
AL358852.1	5.60529	0.0262576	0.23925	0.10975	0.912608	1	FALSE
AL360294.1	2.3771	0.00801084	0.17225	0.0465071	0.962906	1	FALSE
AL365181.1	18.2609	-0.294804	0.303247	-0.972157	0.330972	1	FALSE
AL450992.2	24.7994	-0.0756675	0.30619	-0.247126	0.804811	1	FALSE
AL513523.2	5.4494	-0.115838	0.208859	-0.554624	0.579152	1	FALSE
AL590762.11	1.25619	0.105849	0.135976	0.778436	0.436312	1	FALSE
AL590762.6	1.94071	-0.00255871	0.158313	-0.0161624	0.987105	1	FALSE
AL590762.7	3.27295	-0.17696	0.200302	-0.883468	0.376984	1	FALSE
AL590763.16	39.8265	0.034747	0.301276	0.115333	0.908181	1	FALSE
AL590763.5	0.406702	-0.043529	0.0747468	-0.582352	0.560329	1	FALSE
AL591893.1	1.47899	-0.194195	0.1379	-1.40824	0.159061	1	FALSE
ALAD	3820.62	-0.0834026	0.247791	-0.336584	0.73643	1	FALSE
ALAS1	1170.59	0.00792342	0.265294	0.0298666	0.976173	1	FALSE
ALAS2	32.1016	-0.0849875	0.307827	-0.276089	0.78248	1	FALSE
ALB	4.11669	0.012056	0.223556	0.0539283	0.956992	1	FALSE
ALCAM	746.176	-0.292571	0.275896	-1.06044	0.288943	1	FALSE
ALDH16A1	1364.25	-0.00632474	0.250679	-0.0252305	0.979871	1	FALSE
ALDH18A1	2397.46	0.0360212	0.238127	0.151269	0.879764	1	FALSE
ALDH1A1	129.425	0.0569423	0.302474	0.188255	0.850676	1	FALSE
ALDH1A2	3.0463	0.0931079	0.190636	0.488407	0.625261	1	FALSE
ALDH1A3	672.213	-0.22646	0.243213	-0.931119	0.351792	1	FALSE
ALDH1B1	1551.75	-0.0556194	0.263277	-0.211258	0.832686	1	FALSE
ALDH1L1	6.58979	0.121793	0.254371	0.478801	0.63208	1	FALSE
ALDH1L2	22.8475	0.168584	0.294606	0.572236	0.567162	1	FALSE
ALDH2	1439.8	0.0665826	0.228897	0.290884	0.77114	1	FALSE
ALDH3A1	15.3077	0.203087	0.29005	0.700178	0.483816	1	FALSE
ALDH3A2	4450.37	-0.123607	0.252516	-0.489501	0.624487	1	FALSE
ALDH3B1	2.16686	0.119154	0.159268	0.748132	0.45438	1	FALSE
ALDH3B2	0.501375	-0.000511743	0.0840109	-0.00609139	0.99514	1	FALSE
ALDH4A1	284.456	-0.186058	0.25371	-0.733349	0.463346	1	FALSE
ALDH5A1	164.206	-0.0998927	0.272031	-0.36721	0.713462	1	FALSE
ALDH6A1	871.721	-0.107017	0.238256	-0.449167	0.653311	1	FALSE
ALDH7A1	3448.61	0.059164	0.219369	0.2697	0.787391	1	FALSE
ALDH7A1P1	6.1191	0.124186	0.237635	0.522594	0.601257	1	FALSE
ALDH8A1	3.03752	-0.0967756	0.192918	-0.501642	0.61592	1	FALSE
ALDH9A1	1710.27	0.173372	0.239044	0.725275	0.468284	1	FALSE
ALDOA	44581.6	-0.0668114	0.306277	-0.218141	0.82732	1	FALSE
ALDOAP1	3.22155	0.126364	0.190676	0.662716	0.507512	1	FALSE
ALDOAP2	3.26337	-0.012523	0.196538	-0.0637178	0.949195	1	FALSE
ALDOC	1299.97	0.115037	0.306476	0.375354	0.707397	1	FALSE
ALG1	501.467	-0.00374074	0.244776	-0.0152823	0.987807	1	FALSE
ALG10	108.131	-0.0932588	0.27927	-0.333938	0.738426	1	FALSE
ALG10B	226.396	-0.0945411	0.276038	-0.342493	0.73198	1	FALSE
ALG11	236.261	-0.104038	0.307729	-0.338083	0.735301	1	FALSE
ALG12	797.561	-0.0244279	0.283307	-0.086224	0.931288	1	FALSE
ALG13	924.097	-0.00784887	0.263461	-0.0297914	0.976233	1	FALSE
ALG14	228.339	0.0296748	0.260858	0.113759	0.909429	1	FALSE
ALG1L	19.6244	-0.12623	0.297273	-0.424624	0.67111	1	FALSE
ALG1L13P	3.35742	-0.180957	0.206469	-0.876437	0.380793	1	FALSE
ALG1L15P	0.890863	0.0550205	0.101669	0.541171	0.58839	1	FALSE
ALG1L2	56.3161	0.151214	0.301955	0.500783	0.616524	1	FALSE
ALG1L3P	0.406519	0.0427812	0.0747468	0.572348	0.567086	1	FALSE
ALG1L5P	4.61664	-0.0748724	0.234627	-0.319112	0.749641	1	FALSE
ALG1L6P	0.354437	-0.000373885	0.0747468	-0.00500202	0.996009	1	FALSE
ALG1L7P	78.7491	-0.0726832	0.306545	-0.237104	0.812576	1	FALSE
ALG1L8P	4.85589	0.0943569	0.23654	0.398905	0.689964	1	FALSE
ALG1L9P	5.7209	0.167341	0.236408	0.707849	0.479039	1	FALSE
ALG2	902.657	-0.0195497	0.233005	-0.0839025	0.933134	1	FALSE
ALG3	834.996	0.0194548	0.307782	0.0632097	0.9496	1	FALSE
ALG5	478.736	0.0043008	0.279718	0.0153755	0.987733	1	FALSE
ALG6	387.311	-0.0310302	0.249231	-0.124504	0.900916	1	FALSE
ALG8	1352.01	0.0523566	0.236587	0.2213	0.824859	1	FALSE
ALG9	149.125	-0.135513	0.287868	-0.470747	0.637822	1	FALSE
ALK	60.8134	-0.121224	0.307908	-0.393703	0.693801	1	FALSE
ALKBH1	389.171	-0.0809681	0.244804	-0.330747	0.740836	1	FALSE
ALKBH2	304.063	0.116811	0.269905	0.432784	0.665172	1	FALSE
ALKBH3	423.015	0.0792837	0.279905	0.283252	0.776984	1	FALSE
ALKBH4	391.222	0.0688584	0.289271	0.238041	0.811849	1	FALSE
ALKBH5	2430.62	-0.0161595	0.262478	-0.0615652	0.950909	1	FALSE
ALKBH6	97.5683	-0.254552	0.300571	-0.846893	0.397055	1	FALSE
ALKBH7	1358.63	0.0904254	0.306458	0.295066	0.767943	1	FALSE
ALKBH8	186.97	0.0471542	0.283438	0.166365	0.86787	1	FALSE
ALMS1	1825.39	0.0400245	0.297967	0.134325	0.893145	1	FALSE
ALMS1-IT1	54.7498	-0.0547271	0.300499	-0.182121	0.855488	1	FALSE
ALMS1P1	3.11535	-0.141975	0.204676	-0.693657	0.487898	1	FALSE
ALOX12	3.58338	0.0690647	0.209538	0.329604	0.741699	1	FALSE
ALOX12-AS1	25.31	-0.0312792	0.30683	-0.101943	0.918802	1	FALSE
ALOX12B	11.964	-0.124046	0.277105	-0.447648	0.654407	1	FALSE
ALOX12P2	164.377	-0.351535	0.300068	-1.17152	0.241391	1	FALSE
ALOX15	5.08044	-0.0855916	0.190348	-0.449657	0.652958	1	FALSE
ALOX15B	3.23288	-0.0822839	0.19041	-0.432141	0.665639	1	FALSE
ALOX5	11.1448	-0.139516	0.272331	-0.512302	0.60844	1	FALSE
ALOX5AP	0.818034	-0.0391919	0.0990478	-0.395687	0.692336	1	FALSE
ALOXE3	1.61576	-0.0478324	0.148166	-0.322829	0.746825	1	FALSE
ALPK1	2.88989	0.132432	0.195844	0.67621	0.498908	1	FALSE
ALPK2	98.5821	-0.0926862	0.306966	-0.301943	0.762696	1	FALSE
ALPK3	5609.67	-0.0900869	0.284797	-0.31632	0.75176	1	FALSE
ALPL	6339.45	0.141329	0.294566	0.479787	0.631379	1	FALSE
ALPPL2	0.49657	-0.0336771	0.0755622	-0.445687	0.655823	1	FALSE
ALS2	2625.41	0.07806	0.282938	0.275891	0.782632	1	FALSE
ALS2CL	260.728	-0.15777	0.29535	-0.534181	0.593216	1	FALSE
ALS2CR11	0.321245	0	0.0747468	0	1	1	FALSE
ALS2CR12	5.46168	0.0914118	0.241985	0.377759	0.70561	1	FALSE
ALX1	20.0547	0.0114008	0.302717	0.0376616	0.969957	1	FALSE
ALX3	1.29762	0.0187106	0.121031	0.154593	0.877142	1	FALSE
ALX4	0.461555	0.0360399	0.0752936	0.478658	0.632182	1	FALSE
ALYREF	2363.37	0.0913059	0.282864	0.322791	0.746854	1	FALSE
AMACR	72.9381	0.0354033	0.300802	0.117696	0.906308	1	FALSE
AMBP	31.1314	0.162302	0.298822	0.543138	0.587035	1	FALSE
AMBRA1	3056.25	0.0428756	0.230046	0.186378	0.852148	1	FALSE
AMD1	2619.42	0.0485205	0.271338	0.178819	0.85808	1	FALSE
AMD1P3	0.753779	0	0.0989998	0	1	1	FALSE
AMD1P4	0.262677	0	0.0747468	0	1	1	FALSE
AMDHD1	6.15501	-0.120158	0.248636	-0.48327	0.628904	1	FALSE
AMDHD2	1205.16	-0.042955	0.236489	-0.181636	0.855868	1	FALSE
AMELY	0.449779	-0.000486767	0.0813993	-0.00597999	0.995229	1	FALSE
AMER1	898.489	0.141592	0.26509	0.534128	0.593253	1	FALSE
AMER2	14.9072	-0.0192828	0.288481	-0.0668424	0.946707	1	FALSE
AMER3	7.33202	0.0709046	0.253946	0.279212	0.780082	1	FALSE
AMFR	2188.78	0.00574373	0.253643	0.022645	0.981933	1	FALSE
AMH	245.879	-0.227766	0.301702	-0.754938	0.450286	1	FALSE
AMHR2	597.516	0.19894	0.270028	0.736737	0.461282	1	FALSE
AMIGO1	85.4815	0.0689244	0.299197	0.230365	0.817808	1	FALSE
AMIGO2	187.093	0.00701162	0.269659	0.0260018	0.979256	1	FALSE
AMMECR1	1938.47	-0.174318	0.271391	-0.642311	0.520671	1	FALSE
AMMECR1L	1473.63	-0.0544118	0.239794	-0.22691	0.820493	1	FALSE
AMMECR1LP1	2.81351	-0.143266	0.198797	-0.720665	0.471116	1	FALSE
AMN	132.971	0.0577149	0.307498	0.187692	0.851118	1	FALSE
AMN1	224.993	-0.067122	0.259117	-0.259042	0.795603	1	FALSE
AMOT	1390.86	0.0839656	0.286284	0.293295	0.769297	1	FALSE
AMOTL1	5041.41	-0.0966458	0.270676	-0.357053	0.721052	1	FALSE
AMOTL2	4853.46	0.0257694	0.222773	0.115676	0.90791	1	FALSE
AMPD2	907.018	0.0584945	0.277899	0.210488	0.833286	1	FALSE
AMPD3	141.714	-0.101905	0.299504	-0.340245	0.733672	1	FALSE
AMPH	41.4472	0.370819	0.305235	1.21486	0.224419	1	FALSE
AMT	13.9472	-0.099647	0.297007	-0.335504	0.737245	1	FALSE
AMY2B	27.8079	-0.0933943	0.307849	-0.303377	0.761603	1	FALSE
AMZ1	11.9357	0.0941796	0.290351	0.324365	0.745662	1	FALSE
AMZ2	1575.27	-0.0397593	0.246173	-0.161509	0.871692	1	FALSE
AMZ2P1	205.32	-0.108373	0.286756	-0.377928	0.705484	1	FALSE
ANAPC1	903.504	0.207409	0.281275	0.737388	0.460887	1	FALSE
ANAPC10	282.885	0.213533	0.268456	0.795413	0.426373	1	FALSE
ANAPC10P1	0.260469	-0.043529	0.0747468	-0.582352	0.560329	1	FALSE
ANAPC11	2391.04	0.291141	0.30322	0.960164	0.336973	1	FALSE
ANAPC13	802.439	0.10077	0.242874	0.414904	0.678212	1	FALSE
ANAPC15	831.166	0.141193	0.283244	0.498487	0.618141	1	FALSE
ANAPC16	2305.48	0.0629291	0.241504	0.260572	0.794423	1	FALSE
ANAPC1P1	0.41094	-0.000373885	0.0747468	-0.00500202	0.996009	1	FALSE
ANAPC2	1055.02	0.0506132	0.247853	0.204207	0.838192	1	FALSE
ANAPC4	1160.35	0.00861252	0.285342	0.0301831	0.975921	1	FALSE
ANAPC5	3557.89	0.085929	0.226299	0.379715	0.704157	1	FALSE
ANAPC7	1565.42	-0.00354227	0.230944	-0.0153382	0.987762	1	FALSE
ANG	90.2011	-0.163256	0.306267	-0.533051	0.593998	1	FALSE
ANGEL1	829.903	-0.012031	0.29035	-0.0414361	0.966948	1	FALSE
ANGEL2	1568.65	-0.00730634	0.26906	-0.0271551	0.978336	1	FALSE
ANGPT1	642.027	-0.0665662	0.253023	-0.263084	0.792486	1	FALSE
ANGPT2	374.548	-0.316179	0.299682	-1.05505	0.291404	1	FALSE
ANGPT4	53.5518	0.199228	0.303448	0.656548	0.511471	1	FALSE
ANGPTL2	558.911	0.131281	0.278438	0.471491	0.63729	1	FALSE
ANGPTL4	481.218	0.0503522	0.299789	0.167959	0.866616	1	FALSE
ANGPTL6	3.53109	0.109976	0.211886	0.519035	0.603736	1	FALSE
ANGPTL7	1.063	-0.0540614	0.120773	-0.447629	0.654421	1	FALSE
ANGPTL8	0.200215	-0.043529	0.0747468	-0.582352	0.560329	1	FALSE
ANK1	12.5765	0.0312748	0.287407	0.108817	0.913348	1	FALSE
ANK2	2007.08	-0.0921779	0.306728	-0.30052	0.76378	1	FALSE
ANK3	840.905	0.0161677	0.251646	0.0642481	0.948773	1	FALSE
ANKAR	49.1809	-0.385371	0.30531	-1.26223	0.206867	1	FALSE
ANKDD1A	1203.92	-0.350499	0.29309	-1.19588	0.231745	1	FALSE
ANKDD1B	63.8143	-0.537655	0.307477	-1.7486	0.0803598	1	FALSE
ANKEF1	426.492	-0.141677	0.240889	-0.588145	0.556435	1	FALSE
ANKFN1	0.614907	-0.0619349	0.0909225	-0.681184	0.495755	1	FALSE
ANKFY1	2919.39	-0.0706556	0.280382	-0.251998	0.801043	1	FALSE
ANKH	481.024	0.0401283	0.255048	0.157336	0.87498	1	FALSE
ANKHD1	72.5662	-0.29501	0.307644	-0.958933	0.337593	1	FALSE
ANKHD1-EIF4EBP3	26.7134	-0.169275	0.307389	-0.550686	0.581849	1	FALSE
ANKIB1	1705.86	-0.0494629	0.269752	-0.183364	0.854512	1	FALSE
ANKK1	3.32958	0.0589883	0.20519	0.287481	0.773744	1	FALSE
ANKLE1	165.585	-0.0154845	0.277889	-0.0557219	0.955563	1	FALSE
ANKLE2	2680.95	-0.0655682	0.263645	-0.248699	0.803594	1	FALSE
ANKMY1	183.695	0.085306	0.278806	0.305968	0.759629	1	FALSE
ANKMY2	1116.84	0.111824	0.231715	0.482591	0.629386	1	FALSE
ANKRA2	310.583	0.0183633	0.271324	0.0676803	0.94604	1	FALSE
ANKRD1	1189.62	0.202677	0.285433	0.710071	0.47766	1	FALSE
ANKRD10	1728.13	-0.222648	0.264113	-0.843006	0.399225	1	FALSE
ANKRD10-IT1	84.3123	-0.605608	0.300141	-2.01774	0.0436181	1	FALSE
ANKRD11	4083.98	-0.125732	0.241742	-0.520108	0.602989	1	FALSE
ANKRD12	1332.86	-0.221172	0.302764	-0.730509	0.465079	1	FALSE
ANKRD13A	2505.17	0.0238171	0.246737	0.0965284	0.923101	1	FALSE
ANKRD13B	16.7337	0.00609126	0.293893	0.0207261	0.983464	1	FALSE
ANKRD13C	751.254	-0.048996	0.273287	-0.179284	0.857715	1	FALSE
ANKRD13D	788.647	-0.161307	0.268495	-0.600783	0.547984	1	FALSE
ANKRD16	229.627	-0.118322	0.276473	-0.42797	0.668673	1	FALSE
ANKRD17	4561.17	0.0317047	0.225901	0.140347	0.888386	1	FALSE
ANKRD18A	48.7949	-0.407691	0.307904	-1.32409	0.185474	1	FALSE
ANKRD18B	9.97063	0.0979125	0.268795	0.364265	0.71566	1	FALSE
ANKRD18CP	113.915	-0.385334	0.307739	-1.25215	0.210517	1	FALSE
ANKRD19P	63.2308	-0.451975	0.295345	-1.53033	0.125935	1	FALSE
ANKRD20A11P	16.6372	-0.0650732	0.288306	-0.225709	0.821428	1	FALSE
ANKRD20A18P	2.95016	-0.000747603	0.190214	-0.00393033	0.996864	1	FALSE
ANKRD20A4	1.03629	-0.0325826	0.118557	-0.274825	0.78345	1	FALSE
ANKRD20A5P	0.240869	0	0.0747468	0	1	1	FALSE
ANKRD23	6.71697	-0.0229326	0.260839	-0.0879185	0.929941	1	FALSE
ANKRD24	113.245	0.00873911	0.307724	0.0283992	0.977344	1	FALSE
ANKRD26	730.291	-0.15743	0.254879	-0.617665	0.536796	1	FALSE
ANKRD26P4	0.255703	-0.0219514	0.0747468	-0.293677	0.769005	1	FALSE
ANKRD27	1484.85	-0.0933197	0.236273	-0.394965	0.692868	1	FALSE
ANKRD28	1238.14	0.0820342	0.246363	0.332981	0.739149	1	FALSE
ANKRD29	5.93457	-0.152508	0.250164	-0.609631	0.542106	1	FALSE
ANKRD31	4.97026	-0.0491995	0.237525	-0.207134	0.835905	1	FALSE
ANKRD33	25.3656	0.0300001	0.268936	0.111551	0.911179	1	FALSE
ANKRD33B	487.245	0.000329006	0.273896	0.00120121	0.999042	1	FALSE
ANKRD34A	115.058	-0.158346	0.304185	-0.520559	0.602674	1	FALSE
ANKRD34B	3.95739	0.0153085	0.222593	0.0687735	0.94517	1	FALSE
ANKRD35	34.1673	0.032626	0.307428	0.106126	0.915483	1	FALSE
ANKRD36	117.08	-0.293318	0.306465	-0.957101	0.338516	1	FALSE
ANKRD36B	35.9556	-0.323864	0.293609	-1.10304	0.270008	1	FALSE
ANKRD36BP2	3.71592	-0.179262	0.2134	-0.840027	0.400894	1	FALSE
ANKRD36C	38.2781	-0.287627	0.299137	-0.961522	0.33629	1	FALSE
ANKRD37	131.336	0.208277	0.298969	0.696652	0.486021	1	FALSE
ANKRD39	98.1974	0.0107034	0.292024	0.0366526	0.970762	1	FALSE
ANKRD40	1976.8	-0.0626121	0.255242	-0.245305	0.80622	1	FALSE
ANKRD42	404.411	-0.0198909	0.285097	-0.0697689	0.944378	1	FALSE
ANKRD44	4.67133	-0.267216	0.230546	-1.15906	0.246432	1	FALSE
ANKRD45	18.1467	0.432757	0.297708	1.45363	0.146049	1	FALSE
ANKRD46	670.593	0.127299	0.245256	0.519044	0.60373	1	FALSE
ANKRD49	388.908	0.178567	0.261284	0.683423	0.49434	1	FALSE
ANKRD50	1385.36	-0.0910222	0.290947	-0.312847	0.754397	1	FALSE
ANKRD52	2377.8	-0.126087	0.274515	-0.459308	0.646013	1	FALSE
ANKRD53	32.7187	-0.00382255	0.29552	-0.012935	0.98968	1	FALSE
ANKRD54	346.289	-0.000163379	0.296267	-0.000551457	0.99956	1	FALSE
ANKRD6	4374.26	-0.169681	0.275168	-0.616648	0.537467	1	FALSE
ANKRD61	2.90346	-0.141822	0.182394	-0.777561	0.436828	1	FALSE
ANKRD65	17.8099	-0.0612661	0.301353	-0.203303	0.838898	1	FALSE
ANKRD7	4.47747	-0.171144	0.225865	-0.757727	0.448615	1	FALSE
ANKRD9	365.919	0.168407	0.307552	0.547574	0.583984	1	FALSE
ANKS1A	2305.89	0.069719	0.249274	0.279688	0.779717	1	FALSE
ANKS1B	1573.01	-0.182406	0.247852	-0.735948	0.461762	1	FALSE
ANKS3	515.822	0.0798291	0.248136	0.321715	0.747668	1	FALSE
ANKS4B	1.55957	0.0516224	0.140999	0.366119	0.714277	1	FALSE
ANKS6	1733.55	0.108902	0.231865	0.469679	0.638584	1	FALSE
ANKUB1	0.505958	0.0623802	0.0763359	0.81718	0.413826	1	FALSE
ANKZF1	2330.57	0.113022	0.291076	0.388289	0.697802	1	FALSE
ANLN	2489.61	0.0557667	0.27461	0.203075	0.839076	1	FALSE
ANO1	67.8425	0.0237724	0.301151	0.0789387	0.937081	1	FALSE
ANO10	2025.62	-0.0628938	0.230602	-0.272738	0.785055	1	FALSE
ANO2	173.159	0.00969697	0.306438	0.0316442	0.974756	1	FALSE
ANO3	0.766569	0.0366182	0.107175	0.341667	0.732601	1	FALSE
ANO4	137.911	-0.241221	0.299514	-0.805375	0.420603	1	FALSE
ANO5	204.035	-0.0752428	0.278301	-0.270365	0.78688	1	FALSE
ANO6	2581.03	0.0791879	0.260424	0.304073	0.761072	1	FALSE
ANO7	112.446	0.0803541	0.297225	0.270348	0.786893	1	FALSE
ANO7L1	7.10011	-0.106318	0.245506	-0.433056	0.664974	1	FALSE
ANO8	897.959	-0.321435	0.263194	-1.22128	0.221979	1	FALSE
ANO9	449.449	-0.209558	0.291092	-0.719904	0.471584	1	FALSE
ANOS1	413.024	-0.150168	0.265932	-0.564687	0.572287	1	FALSE
ANOS2P	284.429	-0.0322107	0.272986	-0.117994	0.906073	1	FALSE
ANP32A	9736.19	0.0936355	0.236547	0.395843	0.692221	1	FALSE
ANP32AP1	6.38098	-0.144576	0.255676	-0.565464	0.571758	1	FALSE
ANP32B	6727.35	0.0600862	0.252279	0.238174	0.811746	1	FALSE
ANP32BP1	9.60146	0.0199457	0.280758	0.0710423	0.943364	1	FALSE
ANP32BP3	1.01838	-0.0145638	0.119303	-0.122074	0.90284	1	FALSE
ANP32C	8.76663	0.302261	0.267174	1.13133	0.257916	1	FALSE
ANP32D	2.33652	0.040964	0.158327	0.25873	0.795844	1	FALSE
ANP32E	2850.92	0.0922174	0.246853	0.373572	0.708722	1	FALSE
ANPEP	33.6035	0.138815	0.289581	0.479366	0.631678	1	FALSE
ANTXR1	1570.71	0.0459578	0.230806	0.199118	0.84217	1	FALSE
ANTXR2	153.878	0.102376	0.273799	0.373908	0.708473	1	FALSE
ANTXRLP1	0.194744	-0.0219514	0.0747468	-0.293677	0.769005	1	FALSE
ANXA1	68.83	0.203661	0.304606	0.668607	0.503746	1	FALSE
ANXA11	4754.6	-0.0556041	0.270964	-0.205208	0.837409	1	FALSE
ANXA13	0.569617	-0.000427185	0.0876731	-0.00487247	0.996112	1	FALSE
ANXA2	10982.4	0.0549301	0.26036	0.210977	0.832905	1	FALSE
ANXA2P1	3.06612	-0.0335218	0.166973	-0.200761	0.840885	1	FALSE
ANXA2P2	32.2058	0.111224	0.30766	0.361517	0.717713	1	FALSE
ANXA2P3	1.86343	-0.0981605	0.174559	-0.562334	0.573888	1	FALSE
ANXA2R	12.2491	-0.0339273	0.274029	-0.123809	0.901466	1	FALSE
ANXA3	1282.01	-0.171468	0.259667	-0.660338	0.509037	1	FALSE
ANXA4	582.982	-0.0127266	0.269891	-0.0471546	0.96239	1	FALSE
ANXA5	8784.96	0.0859044	0.233687	0.367605	0.713168	1	FALSE
ANXA6	8673.81	-0.0159775	0.2366	-0.0675294	0.94616	1	FALSE
ANXA7	2877.55	0.0475592	0.220791	0.215404	0.829453	1	FALSE
ANXA8L1	9.20558	-0.249905	0.270966	-0.922275	0.356385	1	FALSE
ANXA9	7.5895	-0.091283	0.249948	-0.365208	0.714956	1	FALSE
AOAH	4.09139	0.0182243	0.226191	0.0805704	0.935784	1	FALSE
AOC2	38.3625	0.00150333	0.307819	0.0048838	0.996103	1	FALSE
AOC3	18.5663	0.124634	0.301182	0.413816	0.679009	1	FALSE
AOC4P	0.355487	0.0212037	0.0747468	0.283673	0.776661	1	FALSE
AOX1	357.589	0.0950114	0.267928	0.354615	0.722878	1	FALSE
AP000221.1	0.335506	0	0.0747468	0	1	1	FALSE
AP000223.42	1.36394	0.046977	0.129313	0.363282	0.716394	1	FALSE
AP000230.1	5.15433	-0.0145098	0.225887	-0.0642347	0.948783	1	FALSE
AP000233.4	0.200215	-0.043529	0.0747468	-0.582352	0.560329	1	FALSE
AP000240.9	1.63809	-0.0684966	0.161923	-0.423019	0.672282	1	FALSE
AP000251.3	22.1934	-0.00847932	0.302527	-0.0280283	0.97764	1	FALSE
AP000253.1	0.513783	-0.0508926	0.0852052	-0.597295	0.55031	1	FALSE
AP000254.8	11.8027	0.132207	0.273504	0.483382	0.628824	1	FALSE
AP000255.6	6.38708	-0.254706	0.257262	-0.990066	0.322142	1	FALSE
AP000265.1	1.14624	-0.0123685	0.122709	-0.100796	0.919713	1	FALSE
AP000266.7	1.14267	-0.041264	0.121954	-0.338357	0.735094	1	FALSE
AP000280.66	0.416411	-0.0219514	0.0747468	-0.293677	0.769005	1	FALSE
AP000281.1	2.78034	-0.136196	0.196395	-0.693477	0.48801	1	FALSE
AP000302.58	0.60467	-0.00876683	0.0903564	-0.0970249	0.922707	1	FALSE
AP000318.2	13.0536	0.094845	0.291128	0.325784	0.744588	1	FALSE
AP000320.6	2.88737	0.0389892	0.188752	0.206563	0.836351	1	FALSE
AP000320.7	3.16745	-0.153559	0.200888	-0.7644	0.444629	1	FALSE
AP000343.1	0.462569	0.0251024	0.0822529	0.305186	0.760225	1	FALSE
AP000344.3	6.29935	0.0832723	0.238171	0.349632	0.726615	1	FALSE
AP000344.4	6.5472	-0.0343471	0.25235	-0.136109	0.891735	1	FALSE
AP000345.1	0.259801	-0.000373885	0.0747468	-0.00500202	0.996009	1	FALSE
AP000345.4	1.2305	0.105644	0.127834	0.826418	0.408567	1	FALSE
AP000347.2	54.991	-0.385168	0.307619	-1.25209	0.210535	1	FALSE
AP000347.4	3.95802	-0.0729901	0.217856	-0.335038	0.737596	1	FALSE
AP000349.2	1.00041	-0.0986572	0.0888179	-1.11078	0.266663	1	FALSE
AP000350.5	18.7935	-0.0556515	0.288188	-0.193109	0.846874	1	FALSE
AP000351.13	0.805828	-0.0158368	0.0902437	-0.175489	0.860695	1	FALSE
AP000351.3	5.81324	0.0623778	0.246999	0.252542	0.800622	1	FALSE
AP000354.2	1.49212	0.0406753	0.14054	0.289421	0.772259	1	FALSE
AP000357.4	0.724867	-0.031456	0.0945807	-0.332583	0.739449	1	FALSE
AP000361.2	0.263023	0.0212037	0.0747468	0.283673	0.776661	1	FALSE
AP000432.1	8.86843	0.0919618	0.271024	0.339313	0.734374	1	FALSE
AP000436.4	0.70172	0.0263557	0.0862023	0.305743	0.759801	1	FALSE
AP000437.3	6.19609	-0.160486	0.227637	-0.705009	0.480804	1	FALSE
AP000438.2	9.58624	0.335871	0.269993	1.244	0.213499	1	FALSE
AP000442.1	7.01272	0.146795	0.261399	0.561573	0.574407	1	FALSE
AP000477.3	0.736605	-0.0493563	0.0862915	-0.571971	0.567342	1	FALSE
AP000487.5	6.46607	0.0155944	0.254786	0.061206	0.951195	1	FALSE
AP000560.3	0.457098	0.0470088	0.0818745	0.574157	0.565861	1	FALSE
AP000568.2	1.09717	-0.000390816	0.123439	-0.00316607	0.997474	1	FALSE
AP000569.9	3.86025	0.156867	0.206582	0.759343	0.447647	1	FALSE
AP000577.2	1.24682	-0.130204	0.127364	-1.0223	0.306637	1	FALSE
AP000580.1	0.260469	-0.043529	0.0747468	-0.582352	0.560329	1	FALSE
AP000593.7	0.362462	0.0427812	0.0747468	0.572348	0.567086	1	FALSE
[truncated: 27,884 more rows]

## Sheet: S3D
gene_short_name	baseMean	log2FoldChange	lfcSE	stat	pvalue	padj	differentially_expressed
LINC00261	2584.63	2.66421	0.276414	9.63848	5.49987e-22	1.64369e-17	TRUE
FOXI2	150.252	1.7395	0.293599	5.92472	3.12821e-09	4.67448e-05	TRUE
GNAO1	1181.73	1.06284	0.284097	3.74113	0.000183197	0.966164	FALSE
NMU	1473.68	1.16468	0.307492	3.78767	0.000152066	0.966164	FALSE
TNFAIP2	281.396	1.09961	0.290508	3.78512	0.000153637	0.966164	FALSE
TNNC1	627.953	1.13254	0.303895	3.72674	0.00019397	0.966164	FALSE
5S_rRNA	0.805266	0.0252467	0.110152	0.229199	0.818714	1	FALSE
A1BG	4.54505	0.230243	0.206169	1.11677	0.264094	1	FALSE
A1BG-AS1	201.788	0.465727	0.270577	1.72124	0.0852078	1	FALSE
A1CF	2.1051	-0.0553623	0.164026	-0.33752	0.735725	1	FALSE
A2M	0.618131	0.00017303	0.0897329	0.00192827	0.998461	1	FALSE
A2M-AS1	21.0232	-0.0840225	0.305507	-0.275026	0.783296	1	FALSE
A2ML1	472.429	-0.21601	0.275353	-0.784484	0.432756	1	FALSE
A2MP1	0.778493	0.000209223	0.0968924	0.00215933	0.998277	1	FALSE
A3GALT2	0.506141	0.0229575	0.0846161	0.271313	0.78615	1	FALSE
A4GALT	109.558	0.27332	0.307763	0.888087	0.374494	1	FALSE
AAAS	1744.15	0.156865	0.247602	0.633536	0.526384	1	FALSE
AACS	2073.07	0.060347	0.228679	0.263894	0.791861	1	FALSE
AACSP1	0.642482	0.0313366	0.0912456	0.343432	0.731274	1	FALSE
AADACL3	1.88041	0.0113748	0.154204	0.0737644	0.941198	1	FALSE
AADACL4	0.784127	0.0782906	0.0794482	0.98543	0.324413	1	FALSE
AADAT	1697.35	0.256904	0.252102	1.01905	0.308179	1	FALSE
AAED1	120.086	0.277767	0.28682	0.968436	0.332827	1	FALSE
AAGAB	3396.11	-0.135682	0.273637	-0.495847	0.620002	1	FALSE
AAK1	519.28	0.436599	0.256403	1.70278	0.0886087	1	FALSE
AAMDC	408.33	0.339849	0.273899	1.24078	0.214687	1	FALSE
AAMP	3313.77	-0.117746	0.250964	-0.469176	0.638944	1	FALSE
AANAT	11.8584	-0.258683	0.272189	-0.95038	0.341919	1	FALSE
AAR2	1085.37	0.00728775	0.249324	0.02923	0.976681	1	FALSE
AARD	6.49112	0.0508178	0.246477	0.206177	0.836653	1	FALSE
AARS	7563.2	0.218861	0.273864	0.799157	0.424199	1	FALSE
AARS2	844.993	0.0994604	0.243546	0.408385	0.682991	1	FALSE
AARSD1	40.8802	0.118571	0.306726	0.386571	0.699074	1	FALSE
AASDH	480.106	-0.0718175	0.298441	-0.240642	0.809833	1	FALSE
AASDHPPT	1558.23	-0.158939	0.252298	-0.629966	0.528717	1	FALSE
AASS	973.479	-0.117724	0.298293	-0.394657	0.693096	1	FALSE
AATBC	0.96503	-0.0557125	0.105985	-0.525663	0.599122	1	FALSE
AATF	2983.42	-0.0332562	0.223712	-0.148656	0.881825	1	FALSE
AATK	31.6822	0.0561408	0.30759	0.182519	0.855176	1	FALSE
AB015752.3	0.703093	-0.0392607	0.11202	-0.350479	0.725979	1	FALSE
AB019441.29	11.8172	0.0521204	0.285499	0.182559	0.855144	1	FALSE
ABALON	1.40566	-0.0229054	0.138476	-0.16541	0.868621	1	FALSE
ABAT	179.904	0.241377	0.266468	0.905838	0.365022	1	FALSE
ABC11-4932300O16.1	0.311882	0.043713	0.0747468	0.584815	0.558672	1	FALSE
ABC12-49244600F4.4	11.5515	-0.344495	0.275837	-1.24891	0.211699	1	FALSE
ABC13-47488600E17.1	1.9462	-0.07036	0.17055	-0.412547	0.679939	1	FALSE
ABC13-47656900H15.1	1.39392	-0.00943848	0.137659	-0.0685642	0.945336	1	FALSE
ABCA1	2260.19	-0.204745	0.298568	-0.685757	0.492866	1	FALSE
ABCA10	7.95328	-0.00481507	0.266044	-0.0180988	0.98556	1	FALSE
ABCA11P	25.0905	0.297918	0.307801	0.967891	0.333099	1	FALSE
ABCA12	1.51558	-0.0851879	0.126668	-0.672527	0.501248	1	FALSE
ABCA13	0.924091	0.0560436	0.123009	0.455607	0.648673	1	FALSE
ABCA17P	0.260469	0	0.0747468	0	1	1	FALSE
ABCA2	702.526	-0.035955	0.260495	-0.138026	0.89022	1	FALSE
ABCA3	336.907	-0.115788	0.25684	-0.450817	0.652122	1	FALSE
ABCA4	16.4725	-0.498184	0.296394	-1.68081	0.092799	1	FALSE
ABCA5	175.54	0.0370467	0.29394	0.126035	0.899705	1	FALSE
ABCA6	1.58817	-0.0441264	0.13542	-0.325849	0.744538	1	FALSE
ABCA7	2236.68	0.0112916	0.266992	0.0422918	0.966266	1	FALSE
ABCA8	1.64646	0.14336	0.152866	0.937814	0.34834	1	FALSE
ABCA9	1.45199	0.00165538	0.121414	0.0136342	0.989122	1	FALSE
ABCA9-AS1	1.85774	-0.0288025	0.15276	-0.188547	0.850448	1	FALSE
ABCB1	2.65434	-0.104219	0.156392	-0.666394	0.505159	1	FALSE
ABCB10	617.936	-0.158567	0.261503	-0.606367	0.544271	1	FALSE
ABCB10P1	2.71359	0.250912	0.187379	1.33906	0.18055	1	FALSE
ABCB10P4	0.214163	0	0.0747468	0	1	1	FALSE
ABCB11	0.766569	-0.0240585	0.107679	-0.223428	0.823203	1	FALSE
ABCB4	6.76065	-0.0847745	0.252286	-0.336026	0.736852	1	FALSE
ABCB5	0.214163	0	0.0747468	0	1	1	FALSE
ABCB6	89.3591	0.169569	0.299787	0.565629	0.571646	1	FALSE
ABCB7	1005.85	-0.00382754	0.248469	-0.0154045	0.987709	1	FALSE
ABCB8	847.441	0.227969	0.250314	0.910731	0.362437	1	FALSE
ABCB9	75.2977	0.201036	0.300581	0.668825	0.503607	1	FALSE
ABCC1	2321.91	-0.270536	0.251123	-1.07731	0.281343	1	FALSE
ABCC10	1026.32	0.251999	0.262167	0.961214	0.336444	1	FALSE
ABCC11	7.53287	-0.100498	0.254551	-0.394805	0.692986	1	FALSE
ABCC12	10.428	0.0048731	0.265372	0.0183633	0.985349	1	FALSE
ABCC2	22.8378	-0.292645	0.305656	-0.957432	0.338349	1	FALSE
ABCC3	0.950507	0.121065	0.109761	1.10299	0.270033	1	FALSE
ABCC4	3680.36	-0.199143	0.296773	-0.671027	0.502203	1	FALSE
ABCC5	1287.08	-0.00418166	0.274962	-0.0152081	0.987866	1	FALSE
ABCC6	13.5977	-0.286258	0.294829	-0.97093	0.331583	1	FALSE
ABCC6P1	12.0784	-0.136955	0.288872	-0.474102	0.635427	1	FALSE
ABCC6P2	1.724	-0.0206044	0.151213	-0.136261	0.891615	1	FALSE
ABCC8	6.61582	-0.391457	0.249022	-1.57198	0.115956	1	FALSE
ABCC9	3.41027	-0.0543808	0.199765	-0.272224	0.78545	1	FALSE
ABCD1	1419.65	0.318751	0.302838	1.05255	0.292549	1	FALSE
ABCD1P4	0.194744	-0.0210196	0.0747468	-0.281211	0.778549	1	FALSE
ABCD2	0.189273	-0.0425971	0.0747468	-0.569886	0.568755	1	FALSE
ABCD3	751.754	-0.16589	0.240637	-0.689381	0.490584	1	FALSE
ABCD4	3240.22	0.0426897	0.258192	0.165341	0.868676	1	FALSE
ABCE1	1759.08	-0.331846	0.256565	-1.29342	0.195867	1	FALSE
ABCF1	4547.92	0.0615689	0.245355	0.250938	0.801862	1	FALSE
ABCF2	1975.99	0.101138	0.24743	0.408756	0.682719	1	FALSE
ABCF2P1	0.807761	-0.0997466	0.102081	-0.977135	0.328502	1	FALSE
ABCF3	1165.98	0.110542	0.238589	0.463316	0.643138	1	FALSE
ABCG1	176.983	-0.165481	0.27464	-0.602537	0.546817	1	FALSE
ABCG2	8.47621	0.144763	0.243865	0.593619	0.552767	1	FALSE
ABCG4	218.358	0.413808	0.296684	1.39478	0.163082	1	FALSE
ABCG8	0.292465	0	0.0747468	0	1	1	FALSE
ABHD1	1.91077	0.0392857	0.162468	0.241806	0.80893	1	FALSE
ABHD10	610.182	0.0203437	0.237074	0.0858116	0.931616	1	FALSE
ABHD11	826.944	0.16982	0.269131	0.630993	0.528045	1	FALSE
ABHD11-AS1	5.20195	0.019174	0.238533	0.0803831	0.935933	1	FALSE
ABHD12	1898.66	0.191953	0.282951	0.678395	0.497521	1	FALSE
ABHD12B	31.2626	0.125797	0.307318	0.409338	0.682291	1	FALSE
ABHD13	522.082	-0.446547	0.25622	-1.74283	0.081364	1	FALSE
ABHD14A	132.079	0.135314	0.307828	0.439577	0.660244	1	FALSE
ABHD14A-ACY1	0.454581	0.0150856	0.0753566	0.200189	0.841333	1	FALSE
ABHD14B	256.674	0.0648946	0.265165	0.244733	0.806663	1	FALSE
ABHD15	56.3534	0.204033	0.303575	0.672102	0.501519	1	FALSE
ABHD16A	67.6934	-0.177551	0.300597	-0.590661	0.554747	1	FALSE
ABHD16B	0.600644	0	0.0758438	0	1	1	FALSE
ABHD17A	473.132	0.0969988	0.267021	0.363262	0.716409	1	FALSE
ABHD17AP1	2.12048	0.244492	0.175585	1.39245	0.163787	1	FALSE
ABHD17AP3	0.89963	0.0259213	0.0847535	0.305843	0.759724	1	FALSE
ABHD17AP5	0.294183	0.000772735	0.0747832	0.010333	0.991756	1	FALSE
ABHD17AP6	0.311882	0.043713	0.0747468	0.584815	0.558672	1	FALSE
ABHD17B	961.79	-0.333926	0.243335	-1.37229	0.169973	1	FALSE
ABHD17C	552.113	0.107337	0.25681	0.417961	0.675976	1	FALSE
ABHD18	553.2	-0.245544	0.270417	-0.908018	0.363869	1	FALSE
ABHD2	731.294	-0.0633189	0.270274	-0.234277	0.81477	1	FALSE
ABHD3	593.969	-0.120824	0.276697	-0.436667	0.662353	1	FALSE
ABHD4	2156.76	0.268492	0.263304	1.0197	0.307868	1	FALSE
ABHD5	450.709	-0.0715456	0.25707	-0.278311	0.780773	1	FALSE
ABHD6	359.274	-0.208858	0.283461	-0.736815	0.461235	1	FALSE
ABHD8	333.267	0.406659	0.307269	1.32346	0.185682	1	FALSE
ABI1	1179.63	0.095746	0.238104	0.402118	0.687597	1	FALSE
ABI2	3077.65	-0.121128	0.227715	-0.53193	0.594774	1	FALSE
ABI3	30.3084	0.348485	0.288528	1.2078	0.227124	1	FALSE
ABI3BP	4.49046	0.020561	0.23071	0.0891203	0.928986	1	FALSE
ABL1	3901.03	-0.00349035	0.240502	-0.0145128	0.988421	1	FALSE
ABL2	952.91	-0.172419	0.251166	-0.686473	0.492415	1	FALSE
ABLIM1	1470.7	-0.24416	0.283513	-0.861193	0.389132	1	FALSE
ABLIM2	24.6538	0.042125	0.304978	0.138125	0.890142	1	FALSE
ABLIM3	2.38359	0.0191197	0.186617	0.102454	0.918396	1	FALSE
ABO	4.78664	-0.0310643	0.231278	-0.134315	0.893153	1	FALSE
ABR	2053.29	0.0960173	0.246307	0.389827	0.696664	1	FALSE
ABRACL	528.285	0.377429	0.267796	1.40939	0.15872	1	FALSE
ABT1	1382.8	0.057663	0.263071	0.219191	0.826501	1	FALSE
ABTB1	168.76	-0.0758233	0.277994	-0.272751	0.785044	1	FALSE
ABTB2	397.782	0.00926878	0.244709	0.0378768	0.969786	1	FALSE
AC000032.2	0.499869	0.0169513	0.0755987	0.224227	0.822581	1	FALSE
AC000035.3	0.200215	0	0.0747468	0	1	1	FALSE
AC000068.10	3.84575	-0.0407624	0.200103	-0.203707	0.838582	1	FALSE
AC000068.5	60.1961	-0.307904	0.296454	-1.03862	0.298981	1	FALSE
AC000068.9	5.3875	-0.0870161	0.241726	-0.359978	0.718864	1	FALSE
AC000089.3	6.16158	-0.34893	0.249619	-1.39785	0.162157	1	FALSE
AC000095.12	1.29829	0.0544444	0.131195	0.414988	0.678151	1	FALSE
AC000095.9	0.259801	0.0221355	0.0747468	0.29614	0.767123	1	FALSE
AC000120.7	2.06765	-0.0787982	0.146772	-0.536875	0.591354	1	FALSE
AC000123.2	17.9468	-0.042322	0.294807	-0.143559	0.885849	1	FALSE
AC000123.3	3.04455	-0.0193317	0.201239	-0.0960637	0.92347	1	FALSE
AC000403.4	0.571822	0.00720422	0.0791332	0.0910392	0.927461	1	FALSE
AC001226.7	1.47053	0.0882669	0.151578	0.582319	0.560352	1	FALSE
AC002044.4	4.91804	0.31936	0.196819	1.62261	0.104674	1	FALSE
AC002056.3	2.78815	0.0887355	0.187956	0.472108	0.63685	1	FALSE
AC002059.10	1.02315	0.00207261	0.118269	0.0175245	0.986018	1	FALSE
AC002064.7	0.194744	-0.0210196	0.0747468	-0.281211	0.778549	1	FALSE
AC002066.1	0.253314	0	0.0747468	0	1	1	FALSE
AC002069.5	0.608802	0.062866	0.098824	0.636141	0.524685	1	FALSE
AC002075.3	0.194076	0.000557948	0.0747468	0.00746451	0.994044	1	FALSE
AC002075.4	5.29203	0.0402526	0.234127	0.171926	0.863495	1	FALSE
AC002076.10	0.462892	-0.0216157	0.0753575	-0.286842	0.774233	1	FALSE
AC002115.5	0.795557	-0.0086535	0.108323	-0.0798862	0.936328	1	FALSE
AC002116.7	4.52647	0.224168	0.229451	0.976976	0.328581	1	FALSE
AC002117.1	1.92245	-0.0563917	0.166364	-0.338966	0.734635	1	FALSE
AC002310.10	0.240869	-0.0210196	0.0747468	-0.281211	0.778549	1	FALSE
AC002310.12	53.6717	-0.143994	0.307618	-0.468092	0.639719	1	FALSE
AC002310.14	2.67038	-0.0860382	0.188784	-0.455749	0.64857	1	FALSE
AC002310.7	1.28403	0.100076	0.13856	0.722257	0.470137	1	FALSE
AC002331.1	0.457421	-0.0463724	0.0819798	-0.565656	0.571628	1	FALSE
AC002398.11	0.501375	-0.0044189	0.0841141	-0.0525346	0.958103	1	FALSE
AC002398.12	0.198878	0.043713	0.0747468	0.584815	0.558672	1	FALSE
AC002454.1	20.4477	0.302644	0.301478	1.00387	0.315443	1	FALSE
AC002456.2	0.649002	0.0734617	0.0935911	0.784922	0.432499	1	FALSE
AC002463.3	0.255703	-0.0210196	0.0747468	-0.281211	0.778549	1	FALSE
AC002467.7	29.0061	-0.134472	0.307369	-0.437493	0.661754	1	FALSE
AC002480.2	51.9929	-0.0362012	0.307888	-0.117579	0.906401	1	FALSE
AC002480.3	3.48054	0.1714	0.200906	0.853132	0.393586	1	FALSE
AC002480.5	125.831	-0.108246	0.27715	-0.390569	0.696116	1	FALSE
AC002486.3	0.603331	0.0370768	0.098579	0.376113	0.706833	1	FALSE
AC002511.2	0.454258	0.0763484	0.0753307	1.01351	0.310817	1	FALSE
AC002519.6	0.451951	-0.0566293	0.0753308	-0.751741	0.452207	1	FALSE
AC002519.8	1.61321	-0.00885196	0.144856	-0.0611089	0.951272	1	FALSE
AC002550.5	1.31604	0.0696695	0.123079	0.566054	0.571357	1	FALSE
AC002550.6	5.36386	-0.108384	0.245032	-0.442326	0.658253	1	FALSE
AC002551.1	0.199546	0.0221355	0.0747468	0.29614	0.767123	1	FALSE
AC003002.6	1.16016	-0.0137476	0.140263	-0.098013	0.921922	1	FALSE
AC003003.5	28.8933	0.317593	0.304472	1.04309	0.296905	1	FALSE
AC003005.2	1.39999	-0.0716437	0.12882	-0.556152	0.578107	1	FALSE
AC003009.1	2.83978	-0.184238	0.182362	-1.01029	0.312357	1	FALSE
AC003075.4	0.656934	-0.0621919	0.100985	-0.615852	0.537993	1	FALSE
AC003080.4	0.626153	0.0494169	0.0813486	0.607471	0.543538	1	FALSE
AC003104.1	2.83683	0.13628	0.176043	0.774128	0.438855	1	FALSE
AC003664.1	1.79129	-0.00560326	0.145116	-0.0386124	0.969199	1	FALSE
AC003682.16	1.17215	0.0598923	0.143148	0.418394	0.675659	1	FALSE
AC003973.3	0.448061	-0.0212918	0.074792	-0.284681	0.775889	1	FALSE
AC003986.7	0.316303	0.0221355	0.0747468	0.29614	0.767123	1	FALSE
AC004019.10	3.54992	0.25956	0.196651	1.31991	0.186867	1	FALSE
AC004019.13	1.92617	0.0845686	0.174828	0.483725	0.628581	1	FALSE
AC004051.2	0.194744	-0.0210196	0.0747468	-0.281211	0.778549	1	FALSE
AC004057.1	0.240869	-0.0210196	0.0747468	-0.281211	0.778549	1	FALSE
AC004067.5	0.352753	0.0220146	0.074767	0.294443	0.768419	1	FALSE
AC004069.2	2.27279	-0.184899	0.172234	-1.07354	0.28303	1	FALSE
AC004076.5	28.2782	0.144354	0.296279	0.487224	0.6261	1	FALSE
AC004076.7	0.255035	0.000557948	0.0747468	0.00746451	0.994044	1	FALSE
AC004076.9	0.207189	0	0.0747468	0	1	1	FALSE
AC004156.3	6.25936	-0.00203652	0.233322	-0.00872837	0.993036	1	FALSE
AC004160.4	23.1046	-0.373298	0.307235	-1.21502	0.224357	1	FALSE
AC004221.2	7.15933	-0.057791	0.262182	-0.220423	0.825542	1	FALSE
AC004231.2	0.346447	0	0.074767	0	1	1	FALSE
AC004381.6	98.5276	0.0134378	0.29489	0.0455686	0.963654	1	FALSE
AC004383.3	0.904106	-0.0437879	0.113761	-0.38491	0.700304	1	FALSE
AC004386.4	6.69208	-0.148054	0.255219	-0.580108	0.561842	1	FALSE
AC004448.5	276.826	0.314889	0.306232	1.02827	0.303822	1	FALSE
AC004449.6	0.420163	0.0220146	0.074767	0.294443	0.768419	1	FALSE
AC004453.8	37.9974	0.0980307	0.307878	0.318408	0.750176	1	FALSE
AC004471.10	0.360577	0	0.074766	0	1	1	FALSE
AC004471.9	1.06402	0.0270387	0.127436	0.212174	0.831971	1	FALSE
AC004485.3	0.392573	0	0.074767	0	1	1	FALSE
AC004490.1	1.10282	-0.0244814	0.131532	-0.186125	0.852347	1	FALSE
AC004538.3	120.937	-0.635854	0.293013	-2.17005	0.030003	1	FALSE
AC004540.5	4.83487	-0.0251721	0.233442	-0.10783	0.91413	1	FALSE
AC004543.2	3.04231	0.00217582	0.177183	0.0122801	0.990202	1	FALSE
AC004549.6	1.07282	-0.043003	0.121086	-0.355143	0.722482	1	FALSE
AC004556.1	2.09656	0.0512219	0.170601	0.300244	0.763991	1	FALSE
AC004754.3	2.42696	-0.100199	0.172747	-0.580034	0.561892	1	FALSE
AC004854.4	0.910282	-0.0372725	0.123011	-0.303001	0.761889	1	FALSE
AC004893.11	45.7826	0.195439	0.301529	0.648162	0.51688	1	FALSE
AC004920.2	0.747496	0.0192693	0.096171	0.200366	0.841195	1	FALSE
AC004938.5	0.292465	0	0.0747468	0	1	1	FALSE
AC004941.5	0.418964	0.0435922	0.074767	0.583041	0.559866	1	FALSE
AC004951.5	9.89702	0.0503316	0.280623	0.179357	0.857658	1	FALSE
AC004951.6	5.78283	0.134601	0.241144	0.558178	0.576723	1	FALSE
AC004967.7	54.2954	0.366751	0.30158	1.2161	0.223948	1	FALSE
AC004980.10	0.355487	0.0435922	0.074767	0.583041	0.559866	1	FALSE
AC004980.7	25.949	-9.68521e-05	0.307335	-0.000315135	0.999749	1	FALSE
AC004985.12	1.08032	-0.0291308	0.136271	-0.213771	0.830726	1	FALSE
AC004987.9	58.3317	0.210054	0.294861	0.712382	0.476228	1	FALSE
AC005009.1	3.20731	0.00355708	0.19161	0.0185641	0.985189	1	FALSE
AC005009.2	9.06205	0.028446	0.27305	0.104179	0.917028	1	FALSE
AC005013.5	1.37979	0.00197172	0.156898	0.0125668	0.989973	1	FALSE
AC005014.5	3.45604	-0.213429	0.206008	-1.03602	0.300192	1	FALSE
AC005017.2	1.352	-0.00913623	0.125799	-0.0726257	0.942104	1	FALSE
AC005019.2	7.64716	-0.188814	0.21557	-0.875885	0.381093	1	FALSE
AC005037.3	4.76191	0.112491	0.21176	0.531219	0.595267	1	FALSE
AC005042.2	1.12599	0.0290165	0.134439	0.215834	0.829117	1	FALSE
AC005062.2	327.668	-0.0503129	0.274713	-0.183147	0.854682	1	FALSE
AC005076.5	23.3797	0.155401	0.304729	0.509965	0.610076	1	FALSE
AC005077.14	29.3051	0.547057	0.30529	1.79192	0.073145	1	FALSE
AC005077.7	2.20636	-0.144483	0.174099	-0.829889	0.406602	1	FALSE
AC005077.8	0.260469	0	0.0747468	0	1	1	FALSE
AC005082.12	1.56526	0.0233848	0.141957	0.164731	0.869156	1	FALSE
AC005083.1	2.6669	-0.166339	0.173423	-0.959153	0.337482	1	FALSE
AC005102.1	1.19763	0.000286101	0.113673	0.00251687	0.997992	1	FALSE
AC005150.1	0.306594	0	0.0747468	0	1	1	FALSE
AC005154.6	305.991	-0.050044	0.302778	-0.165283	0.868722	1	FALSE
AC005154.7	2.56803	0.0479416	0.183399	0.261406	0.793779	1	FALSE
AC005189.6	0.260469	0	0.0747468	0	1	1	FALSE
AC005220.3	3.30197	-0.0219686	0.214335	-0.102497	0.918363	1	FALSE
AC005224.2	14.0098	-0.38684	0.297942	-1.29837	0.194159	1	FALSE
AC005229.5	0.362785	-0.0212918	0.074792	-0.284681	0.775889	1	FALSE
AC005251.3	2.75705	0.174716	0.19696	0.887064	0.375045	1	FALSE
AC005253.2	2.28268	-0.0957421	0.177066	-0.540714	0.588704	1	FALSE
AC005253.4	1.10068	0.0370044	0.110833	0.333876	0.738473	1	FALSE
AC005255.3	1.95073	-0.0729076	0.17134	-0.425513	0.670463	1	FALSE
AC005256.1	1.38404	-0.108373	0.132174	-0.819926	0.412258	1	FALSE
AC005262.2	0.399093	0.0377616	0.0752579	0.501763	0.615835	1	FALSE
AC005262.4	10.3564	0.558459	0.248654	2.24592	0.0247089	1	FALSE
AC005276.1	37.2207	-0.0605668	0.307786	-0.196782	0.843998	1	FALSE
AC005300.5	0.260469	0	0.0747468	0	1	1	FALSE
AC005301.9	0.783813	0.049871	0.0986633	0.505467	0.613231	1	FALSE
AC005306.3	37.0735	0.232074	0.307892	0.753753	0.450998	1	FALSE
AC005307.1	5.52666	0.0164238	0.232789	0.0705521	0.943754	1	FALSE
AC005307.3	6.84664	-0.116466	0.220819	-0.527426	0.597898	1	FALSE
AC005307.4	0.401231	-0.0208048	0.0747832	-0.278202	0.780858	1	FALSE
AC005307.5	16.6505	0.0336537	0.297673	0.113056	0.909986	1	FALSE
AC005324.6	0.262677	-0.0210196	0.0747468	-0.281211	0.778549	1	FALSE
AC005329.7	62.4227	-0.344045	0.307842	-1.1176	0.263736	1	FALSE
AC005336.5	0.259801	0.0221355	0.0747468	0.29614	0.767123	1	FALSE
AC005339.2	1.14943	0.000134286	0.120359	0.00111571	0.99911	1	FALSE
AC005355.1	1.15389	-0.0257067	0.1402	-0.183357	0.854518	1	FALSE
AC005355.2	0.81382	0.050329	0.0999899	0.503341	0.614725	1	FALSE
AC005355.3	0.307296	0	0.074767	0	1	1	FALSE
AC005363.11	1.95374	0.0739817	0.167859	0.440739	0.659402	1	FALSE
AC005394.1	0.717568	0.0422014	0.112743	0.374315	0.70817	1	FALSE
AC005477.1	0.664613	-0.0606788	0.0921245	-0.658661	0.510113	1	FALSE
AC005480.1	1.07271	0.0318617	0.138834	0.229495	0.818484	1	FALSE
AC005481.5	5.86513	-0.126585	0.217532	-0.581912	0.560626	1	FALSE
AC005498.3	1.84997	-0.080885	0.161742	-0.500086	0.617014	1	FALSE
AC005517.3	5.81194	-0.145067	0.209844	-0.69131	0.489371	1	FALSE
AC005519.4	116.627	0.0176788	0.300513	0.0588286	0.953089	1	FALSE
AC005522.6	0.462188	-0.0211165	0.0822399	-0.256767	0.797358	1	FALSE
AC005523.2	2.78209	-0.0693931	0.167114	-0.415244	0.677963	1	FALSE
AC005523.3	0.707572	0.0952993	0.0966871	0.985646	0.324307	1	FALSE
AC005532.5	1.16619	0.0922019	0.128169	0.719375	0.47191	1	FALSE
AC005534.6	0.658471	-0.0490347	0.093514	-0.524357	0.600031	1	FALSE
AC005534.8	2.5129	-0.0327359	0.190198	-0.172115	0.863348	1	FALSE
AC005537.2	1.21602	0.0418468	0.126501	0.330803	0.740794	1	FALSE
AC005539.2	0.198878	0.043713	0.0747468	0.584815	0.558672	1	FALSE
AC005540.3	2.26057	-0.121117	0.166156	-0.728936	0.466041	1	FALSE
AC005546.2	2.52613	0.0176469	0.151142	0.116757	0.907052	1	FALSE
AC005562.1	24.1401	-0.00328908	0.304876	-0.0107883	0.991392	1	FALSE
AC005578.3	3.48037	0.0273903	0.188328	0.145439	0.884364	1	FALSE
AC005592.1	13.2295	-0.0277896	0.287498	-0.0966602	0.922996	1	FALSE
AC005592.2	37.4668	0.0350875	0.306563	0.114455	0.908877	1	FALSE
AC005592.3	1.23802	0.0125448	0.126174	0.0994251	0.920801	1	FALSE
AC005593.2	1.21572	0.0245438	0.127978	0.191781	0.847914	1	FALSE
AC005606.14	3.4013	-0.0823554	0.209131	-0.393799	0.69373	1	FALSE
AC005606.15	0.300322	0	0.0747656	0	1	1	FALSE
AC005609.16	15.1603	-0.00965589	0.299703	-0.0322181	0.974298	1	FALSE
AC005609.18	9.4054	0.134307	0.272605	0.492681	0.622238	1	FALSE
AC005609.19	0.805049	0.0122656	0.110012	0.111494	0.911225	1	FALSE
AC005609.20	3.51872	0.0185362	0.210789	0.087937	0.929927	1	FALSE
AC005616.1	0.354437	0.000772735	0.0747832	0.010333	0.991756	1	FALSE
AC005618.6	15.9076	0.125741	0.296322	0.424338	0.671319	1	FALSE
AC005624.2	4.0576	-0.101022	0.226373	-0.446265	0.655406	1	FALSE
AC005682.5	271.685	-0.0537762	0.279426	-0.192452	0.847388	1	FALSE
AC005682.6	0.725592	0.0812796	0.0966049	0.841362	0.400145	1	FALSE
AC005740.3	0.25538	0.043713	0.0747468	0.584815	0.558672	1	FALSE
AC005740.4	3.1468	-0.0588701	0.16403	-0.358899	0.719671	1	FALSE
AC005740.6	2.08871	-0.0395415	0.166108	-0.238047	0.811845	1	FALSE
AC005753.1	2.332	0.0217043	0.156381	0.138791	0.889615	1	FALSE
AC005754.8	8.44512	0.0922006	0.264152	0.349044	0.727056	1	FALSE
AC005775.2	3.16632	0.111173	0.201394	0.552018	0.580936	1	FALSE
AC005776.1	2.48939	0.0722507	0.163341	0.442329	0.658251	1	FALSE
AC005780.1	10.7202	-0.0736144	0.279107	-0.26375	0.791973	1	FALSE
AC005785.2	3.93128	0.0855538	0.215199	0.397557	0.690957	1	FALSE
AC005785.5	5.9292	0.205181	0.231119	0.887773	0.374663	1	FALSE
AC005786.3	0.511047	0.00546442	0.0848059	0.0644345	0.948624	1	FALSE
AC005786.6	0.516518	0.0227278	0.0769591	0.295323	0.767747	1	FALSE
AC005786.7	7.85987	-0.0143883	0.255218	-0.0563763	0.955042	1	FALSE
AC005795.1	6.7572	-0.209647	0.260889	-0.803588	0.421635	1	FALSE
AC005822.1	3.12951	0.101179	0.200066	0.505726	0.613049	1	FALSE
AC005915.1	0.250578	0.000557948	0.0747468	0.00746451	0.994044	1	FALSE
AC005932.1	0.561626	0.00123752	0.0963089	0.0128495	0.989748	1	FALSE
AC005943.6	1.89323	0.0536865	0.121777	0.440858	0.659316	1	FALSE
AC005944.2	10.2359	0.209112	0.227813	0.917911	0.358666	1	FALSE
AC005954.3	1.51778	-0.0179367	0.131694	-0.1362	0.891664	1	FALSE
AC005954.4	0.399093	0.0377616	0.0752579	0.501763	0.615835	1	FALSE
AC006000.5	5.0593	-0.0559119	0.22854	-0.244648	0.806729	1	FALSE
AC006026.13	5.53347	0.120249	0.204361	0.588417	0.556252	1	FALSE
AC006026.9	1.38729	0.0257507	0.139306	0.18485	0.853347	1	FALSE
AC006028.11	0.396465	-0.0422661	0.0748032	-0.56503	0.572053	1	FALSE
AC006042.7	0.800143	0.0223446	0.101658	0.219802	0.826025	1	FALSE
AC006042.8	1.80756	-0.0267986	0.125848	-0.212944	0.831371	1	FALSE
AC006077.3	11.8384	0.41902	0.261085	1.60492	0.108512	1	FALSE
AC006116.12	0.240869	-0.0210196	0.0747468	-0.281211	0.778549	1	FALSE
AC006116.13	0.254999	-0.0210196	0.0747468	-0.281211	0.778549	1	FALSE
AC006116.14	0.445886	0.0186359	0.0753235	0.247411	0.80459	1	FALSE
AC006116.15	1.5783	-0.0651271	0.135439	-0.480861	0.630615	1	FALSE
AC006116.17	2.42603	-0.0853751	0.183137	-0.466182	0.641085	1	FALSE
AC006116.21	0.402281	0.0220146	0.074767	0.294443	0.768419	1	FALSE
AC006116.22	1.43061	0.180442	0.147814	1.22074	0.222186	1	FALSE
AC006116.24	2.23834	0.0597416	0.16724	0.357221	0.720926	1	FALSE
AC006116.27	2.86953	-0.0160449	0.184859	-0.0867951	0.930834	1	FALSE
AC006128.2	5.79118	-0.463329	0.248664	-1.86328	0.0624234	1	FALSE
AC006129.2	0.925244	0.011458	0.11553	0.0991771	0.920998	1	FALSE
AC006160.5	1.39832	-0.0118088	0.152783	-0.0772913	0.938392	1	FALSE
AC006195.2	0.35924	0.0435922	0.074767	0.583041	0.559866	1	FALSE
AC006262.10	0.673653	-0.00874398	0.0927229	-0.0943023	0.924869	1	FALSE
AC006262.11	1.64477	0.0673532	0.148146	0.45464	0.649369	1	FALSE
AC006262.5	3.2917	0.0942477	0.18824	0.500678	0.616597	1	FALSE
AC006262.6	5.53956	-0.156858	0.240843	-0.651287	0.514862	1	FALSE
AC006272.2	0.471899	0.000285718	0.074792	0.00382016	0.996952	1	FALSE
AC006273.4	12.5617	0.0227901	0.285752	0.0797551	0.936432	1	FALSE
AC006273.5	91.9629	0.0629603	0.307896	0.204486	0.837974	1	FALSE
AC006277.2	2.97348	-0.153947	0.187683	-0.820251	0.412073	1	FALSE
AC006355.3	0.240869	-0.0210196	0.0747468	-0.281211	0.778549	1	FALSE
AC006369.2	1.21193	0.0132248	0.136788	0.0966811	0.92298	1	FALSE
AC006369.3	0.194076	0.000557948	0.0747468	0.00746451	0.994044	1	FALSE
AC006372.4	1.01978	0.0931947	0.128834	0.723372	0.469451	1	FALSE
AC006372.6	1.20392	-0.0530693	0.113761	-0.466498	0.640859	1	FALSE
AC006445.6	0.340977	-0.0208048	0.0747832	-0.278202	0.780858	1	FALSE
AC006445.7	0.302174	0.0221355	0.0747468	0.29614	0.767123	1	FALSE
AC006449.2	0.194076	0.000557948	0.0747468	0.00746451	0.994044	1	FALSE
AC006486.10	0.975302	0.00148165	0.126011	0.0117581	0.990619	1	FALSE
AC006509.4	0.705791	-0.0101146	0.0958289	-0.105549	0.91594	1	FALSE
AC006509.7	1.21698	-0.125466	0.127582	-0.983415	0.325403	1	FALSE
AC006538.1	14.6792	-0.508165	0.281711	-1.80385	0.0712544	1	FALSE
AC006538.8	0.398424	0.056188	0.0752632	0.746554	0.455333	1	FALSE
AC006539.2	0.359908	0.0220146	0.074767	0.294443	0.768419	1	FALSE
AC006547.13	0.200215	0	0.0747468	0	1	1	FALSE
AC006547.15	0.40043	0	0.0751888	0	1	1	FALSE
AC006547.8	2.19068	-0.058137	0.169169	-0.343662	0.7311	1	FALSE
AC006548.28	3.46738	-0.208595	0.212304	-0.982528	0.32584	1	FALSE
AC006942.4	0.707224	0.040572	0.0950485	0.426855	0.669485	1	FALSE
AC006946.15	3.97537	0.192509	0.212399	0.906353	0.364749	1	FALSE
AC006946.16	0.354437	0.000772735	0.0747832	0.010333	0.991756	1	FALSE
AC006978.6	79.7006	0.263887	0.305901	0.862653	0.388329	1	FALSE
AC006994.2	2.1598	-0.157763	0.175171	-0.900623	0.367789	1	FALSE
AC006994.3	0.301826	-0.0208048	0.0747832	-0.278202	0.780858	1	FALSE
AC007016.3	1.01137	-0.0441256	0.119737	-0.368522	0.712484	1	FALSE
AC007036.4	0.255703	-0.0210196	0.0747468	-0.281211	0.778549	1	FALSE
AC007038.7	6.79553	-0.123072	0.231968	-0.530557	0.595726	1	FALSE
AC007041.2	12.9161	-0.0877178	0.29249	-0.2999	0.764254	1	FALSE
AC007091.1	2.89204	-0.100209	0.197568	-0.507211	0.612007	1	FALSE
AC007106.1	7.83423	-0.117304	0.268163	-0.437435	0.661796	1	FALSE
AC007128.1	15.0549	0.285675	0.251871	1.13421	0.256705	1	FALSE
AC007131.1	0.306594	0	0.0747468	0	1	1	FALSE
AC007163.6	0.645887	0	0.0837866	0	1	1	FALSE
AC007182.6	0.751845	0.060714	0.0973635	0.623581	0.532903	1	FALSE
AC007191.4	127.696	-0.126043	0.307028	-0.410525	0.681421	1	FALSE
AC007192.4	0.25538	0.043713	0.0747468	0.584815	0.558672	1	FALSE
AC007193.6	0.469866	-0.0216165	0.0753848	-0.286748	0.774305	1	FALSE
AC007193.8	0.553636	0	0.0785615	0	1	1	FALSE
AC007204.2	1.44649	-0.101146	0.147812	-0.684291	0.493792	1	FALSE
AC007228.11	16.9366	0.0753593	0.29872	0.252274	0.800829	1	FALSE
AC007228.9	34.7624	-0.0528037	0.307103	-0.171941	0.863484	1	FALSE
AC007229.3	4.37073	-0.0232646	0.224012	-0.103854	0.917285	1	FALSE
AC007237.2	0.454545	0.00101901	0.0817836	0.0124598	0.990059	1	FALSE
AC007238.1	51.7127	-0.027928	0.30017	-0.0930404	0.925871	1	FALSE
AC007246.3	25.7725	0.168312	0.307767	0.546882	0.58446	1	FALSE
AC007249.3	8.7842	-0.225767	0.266791	-0.846229	0.397425	1	FALSE
AC007250.4	0.423039	-0.0212918	0.074792	-0.284681	0.775889	1	FALSE
AC007255.8	8.12898	0.116743	0.264597	0.44121	0.659061	1	FALSE
AC007256.5	2.42284	-0.0746814	0.178521	-0.418334	0.675703	1	FALSE
AC007272.3	0.392953	0.0381064	0.0752595	0.506333	0.612623	1	FALSE
AC007277.3	5.54313	-0.0153266	0.242382	-0.0632332	0.949581	1	FALSE
AC007278.3	0.675161	0.000829264	0.0836964	0.00990799	0.992095	1	FALSE
AC007279.2	0.717222	-0.0392771	0.112705	-0.348496	0.727468	1	FALSE
AC007283.4	0.240869	-0.0210196	0.0747468	-0.281211	0.778549	1	FALSE
AC007285.6	1.39452	-0.203599	0.13816	-1.47365	0.140576	1	FALSE
AC007292.3	2.09958	0.0448752	0.116152	0.38635	0.699238	1	FALSE
AC007292.6	30.0297	0.100243	0.307317	0.326187	0.744283	1	FALSE
AC007292.7	17.265	0.138001	0.30239	0.456367	0.648126	1	FALSE
AC007318.5	61.8545	0.44826	0.307826	1.45621	0.145335	1	FALSE
AC007319.1	1.22474	-0.0458677	0.13381	-0.342782	0.731762	1	FALSE
AC007325.2	91.2287	0.399827	0.307113	1.30189	0.192954	1	FALSE
AC007325.4	7.37239	0.207662	0.25334	0.819698	0.412388	1	FALSE
AC007326.1	13.2832	-0.167008	0.293851	-0.568343	0.569802	1	FALSE
AC007362.3	0.640066	-0.0232447	0.0825541	-0.281569	0.778274	1	FALSE
AC007365.3	2.57787	0.0377381	0.161396	0.233822	0.815123	1	FALSE
AC007365.4	0.989956	0.0228171	0.115704	0.197202	0.84367	1	FALSE
AC007383.3	326.435	0.183814	0.28388	0.647506	0.517305	1	FALSE
AC007383.6	1.1257	0.0901635	0.122832	0.734039	0.462925	1	FALSE
AC007386.3	0.61746	0.0372701	0.0989019	0.376839	0.706293	1	FALSE
AC007389.1	0.250578	0.000557948	0.0747468	0.00746451	0.994044	1	FALSE
AC007389.2	0.240869	-0.0210196	0.0747468	-0.281211	0.778549	1	FALSE
AC007390.4	0.263023	0.0221355	0.0747468	0.29614	0.767123	1	FALSE
AC007391.2	1.14361	-0.108651	0.117442	-0.925147	0.354889	1	FALSE
AC007403.2	0.256049	0.0221355	0.0747468	0.29614	0.767123	1	FALSE
AC007405.4	13.2191	-0.11407	0.289861	-0.393532	0.693926	1	FALSE
AC007405.6	239.106	0.322143	0.292087	1.1029	0.270071	1	FALSE
AC007405.8	2.23953	-0.00595636	0.181939	-0.0327383	0.973883	1	FALSE
AC007563.5	0.599761	0	0.0813245	0	1	1	FALSE
AC007566.10	9.5843	0.0852526	0.26421	0.322669	0.746946	1	FALSE
AC007568.1	0.620337	-0.0202627	0.0904621	-0.223991	0.822764	1	FALSE
AC007620.3	1.35316	0.0364633	0.119218	0.305854	0.759716	1	FALSE
AC007679.1	0.3088	-0.0208048	0.0747832	-0.278202	0.780858	1	FALSE
AC007682.1	261.787	-0.118013	0.264193	-0.446692	0.655097	1	FALSE
AC007743.1	2.04884	-0.193623	0.151642	-1.27685	0.201656	1	FALSE
AC007773.2	17.4372	-0.0288882	0.294476	-0.0981005	0.921853	1	FALSE
AC007790.4	1.97696	-0.0892183	0.179893	-0.495952	0.619929	1	FALSE
AC007879.1	0.883543	0.000257145	0.101189	0.00254124	0.997972	1	FALSE
AC007879.2	2.37542	0.096705	0.189158	0.511239	0.609184	1	FALSE
AC007879.4	3.77324	0.0311219	0.224102	0.138874	0.88955	1	FALSE
AC007879.5	1.18876	0.0415452	0.122422	0.33936	0.734338	1	FALSE
AC007879.7	0.556192	-0.0063994	0.0875838	-0.0730661	0.941754	1	FALSE
AC007880.1	0.778872	0.097263	0.108195	0.898961	0.368674	1	FALSE
AC007950.2	2.32589	0.0853524	0.187467	0.455294	0.648898	1	FALSE
AC007952.5	8.08747	0.163116	0.258144	0.631879	0.527466	1	FALSE
AC007966.1	0.250232	-0.0425971	0.0747468	-0.569886	0.568755	1	FALSE
AC007969.4	0.815158	0.0119187	0.10142	0.117518	0.906449	1	FALSE
AC007969.5	279.277	0.296351	0.188778	1.56984	0.116452	1	FALSE
AC008060.7	1.7764	-0.100959	0.156448	-0.645319	0.51872	1	FALSE
AC008065.1	2.43274	0.0364851	0.159741	0.228402	0.819334	1	FALSE
AC008074.1	0.408239	0.000874612	0.0752987	0.0116152	0.990733	1	FALSE
AC008074.3	1.67197	0.128872	0.157367	0.818923	0.41283	1	FALSE
AC008074.5	0.250578	0.000557948	0.0747468	0.00746451	0.994044	1	FALSE
AC008079.10	0.976188	-0.00909319	0.110338	-0.0824123	0.934319	1	FALSE
AC008088.4	19.629	-0.0179859	0.305986	-0.0587802	0.953127	1	FALSE
AC008155.1	6.01039	0.190553	0.224833	0.84753	0.3967	1	FALSE
AC008269.2	1.395	0.0847594	0.14116	0.60045	0.548206	1	FALSE
AC008271.1	0.200215	0	0.0747468	0	1	1	FALSE
AC008277.1	0.199546	0.0221355	0.0747468	0.29614	0.767123	1	FALSE
AC008280.1	0.430143	-0.0536076	0.0752659	-0.712243	0.476314	1	FALSE
AC008427.2	1.18483	-0.0858043	0.135183	-0.634727	0.525606	1	FALSE
AC008440.10	0.201718	-0.0210196	0.0747468	-0.281211	0.778549	1	FALSE
AC008440.5	1.34685	0.0156997	0.109547	0.143315	0.886041	1	FALSE
AC008522.1	4.56344	-0.0459206	0.223669	-0.205306	0.837333	1	FALSE
AC008592.3	2.12959	0.069896	0.156656	0.446177	0.65547	1	FALSE
AC008592.8	0.751952	0.0014587	0.114411	0.0127496	0.989828	1	FALSE
AC008694.2	0.396465	-0.0422661	0.0748032	-0.56503	0.572053	1	FALSE
AC008697.1	3.28644	-0.0421622	0.205822	-0.204848	0.837691	1	FALSE
AC008746.12	8.33962	0.366884	0.248703	1.47519	0.140161	1	FALSE
AC008746.3	2.64733	0.0806957	0.164536	0.490443	0.623821	1	FALSE
AC008753.3	10.8852	-0.0362675	0.280839	-0.12914	0.897247	1	FALSE
AC008753.4	7.66655	0.361755	0.252267	1.43401	0.151568	1	FALSE
AC008753.6	1.41755	-0.0911805	0.151978	-0.599957	0.548535	1	FALSE
AC008759.1	0.548166	-0.020464	0.0871569	-0.234795	0.814368	1	FALSE
AC008781.7	0.857182	-0.0319701	0.111015	-0.28798	0.773362	1	FALSE
AC008834.1	33.6964	-0.00835184	0.30765	-0.0271473	0.978342	1	FALSE
AC008850.3	0.854232	-0.0537484	0.120366	-0.446541	0.655206	1	FALSE
AC008982.2	17.9039	0.0723343	0.303006	0.238722	0.811321	1	FALSE
AC008992.1	0.452296	-0.0135073	0.0753442	-0.179274	0.857723	1	FALSE
AC009005.2	150.518	-0.087098	0.281856	-0.309017	0.757309	1	FALSE
AC009065.1	3.83501	-0.0165172	0.160665	-0.102805	0.918117	1	FALSE
AC009120.11	2.23729	-0.0222993	0.184646	-0.120768	0.903875	1	FALSE
AC009120.3	21.2873	0.185325	0.299933	0.617887	0.53665	1	FALSE
AC009120.4	1.72575	-0.037617	0.154606	-0.24331	0.807765	1	FALSE
AC009120.5	1.92463	0.088208	0.174825	0.504551	0.613874	1	FALSE
AC009120.6	101.583	0.275704	0.294513	0.936135	0.349203	1	FALSE
AC009120.8	1.37006	-0.129985	0.13537	-0.960219	0.336945	1	FALSE
AC009133.12	18.6203	-0.0291022	0.283958	-0.102488	0.91837	1	FALSE
AC009133.15	10.1018	0.190176	0.228666	0.831679	0.40559	1	FALSE
AC009133.17	66.8072	0.598426	0.307477	1.94624	0.0516254	1	FALSE
AC009133.21	7.17124	-0.150022	0.260326	-0.576287	0.564421	1	FALSE
AC009166.7	0.566429	0.0433017	0.0880725	0.491659	0.62296	1	FALSE
AC009229.6	0.201718	-0.0210196	0.0747468	-0.281211	0.778549	1	FALSE
AC009245.3	6.64586	-0.123624	0.239404	-0.516381	0.605588	1	FALSE
AC009262.2	2.00643	0.0758908	0.152616	0.497267	0.619001	1	FALSE
AC009264.1	2.48654	-0.0703055	0.192431	-0.365355	0.714846	1	FALSE
AC009274.6	1.1289	-0.0177023	0.121069	-0.146216	0.883751	1	FALSE
AC009299.2	3.96675	0.0253989	0.225207	0.112781	0.910204	1	FALSE
AC009299.3	118.613	-0.262504	0.275543	-0.952681	0.340752	1	FALSE
AC009299.5	0.761521	0.0874671	0.107546	0.813302	0.416045	1	FALSE
AC009303.2	20.6616	0.0371239	0.305731	0.121427	0.903353	1	FALSE
AC009312.1	6.76233	-0.154984	0.247469	-0.626275	0.531134	1	FALSE
AC009362.2	3.36468	-0.208553	0.202185	-1.03149	0.30231	1	FALSE
AC009403.2	55.2362	-0.0891789	0.301966	-0.295328	0.767744	1	FALSE
AC009404.2	59.2302	0.345091	0.306697	1.12519	0.26051	1	FALSE
AC009411.2	0.302174	0.0221355	0.0747468	0.29614	0.767123	1	FALSE
AC009413.2	2.26718	-0.0615815	0.18035	-0.341455	0.732761	1	FALSE
AC009414.1	0.20652	0.0221355	0.0747468	0.29614	0.767123	1	FALSE
AC009473.1	6.46625	-0.161698	0.252824	-0.63957	0.522452	1	FALSE
AC009487.4	0.299654	0.0220146	0.074767	0.294443	0.768419	1	FALSE
AC009487.6	10.8456	-0.0633761	0.285445	-0.222026	0.824294	1	FALSE
AC009495.2	1.10569	0.0120123	0.120174	0.0999572	0.920378	1	FALSE
AC009495.3	0.357659	0.000772735	0.0747832	0.010333	0.991756	1	FALSE
AC009501.4	12.3049	-0.628771	0.286996	-2.19087	0.0284611	1	FALSE
AC009502.4	0.194076	0.000557948	0.0747468	0.00746451	0.994044	1	FALSE
AC009505.2	0.755917	0.0414052	0.08839	0.468438	0.639472	1	FALSE
AC009506.1	42.5129	-0.188182	0.3072	-0.612573	0.540158	1	FALSE
AC009517.2	0.876245	0.070529	0.121284	0.581522	0.560889	1	FALSE
AC009518.4	0.805266	0.0252467	0.110152	0.229199	0.818714	1	FALSE
AC009531.2	0.194744	-0.0210196	0.0747468	-0.281211	0.778549	1	FALSE
AC009784.3	0.198878	0.043713	0.0747468	0.584815	0.558672	1	FALSE
AC009945.4	0.260469	0	0.0747468	0	1	1	FALSE
AC009948.5	218.887	0.105597	0.293719	0.359516	0.719209	1	FALSE
AC009948.7	7.03089	-0.0744083	0.258355	-0.288008	0.77334	1	FALSE
AC009950.2	0.668675	-0.0207418	0.0922484	-0.224847	0.822098	1	FALSE
AC009955.8	3.12451	-0.0753445	0.180896	-0.416508	0.677039	1	FALSE
AC009961.2	1.90879	0.0651123	0.148979	0.437057	0.66207	1	FALSE
AC009961.3	11.8178	-0.0965617	0.289503	-0.333543	0.738725	1	FALSE
AC009963.5	0.513115	0.0229028	0.0849666	0.269551	0.787506	1	FALSE
AC010091.1	0.311537	0.000557948	0.0747468	0.00746451	0.994044	1	FALSE
AC010095.6	0.439747	0.0191585	0.0753303	0.254327	0.799243	1	FALSE
AC010132.11	0.245671	0.0221355	0.0747468	0.29614	0.767123	1	FALSE
AC010136.2	1.00475	-0.0285203	0.107748	-0.264693	0.791246	1	FALSE
AC010148.1	1.35697	0.0145164	0.150731	0.0963069	0.923277	1	FALSE
AC010150.1	1.85421	0.0758511	0.143025	0.530335	0.59588	1	FALSE
AC010226.4	0.691316	-0.0707827	0.095137	-0.744008	0.456872	1	FALSE
AC010240.2	26.0627	-0.157078	0.262568	-0.59824	0.54968	1	FALSE
AC010240.3	0.462536	0.0220146	0.074767	0.294443	0.768419	1	FALSE
AC010468.1	5.87869	-0.228145	0.242169	-0.942089	0.346147	1	FALSE
AC010492.2	3.27882	0.177966	0.20317	0.875946	0.381059	1	FALSE
AC010504.2	2.16357	0.05064	0.174054	0.290944	0.771094	1	FALSE
AC010524.2	0.420831	0	0.0747666	0	1	1	FALSE
AC010547.9	0.296355	-0.0417551	0.0747941	-0.558267	0.576662	1	FALSE
AC010642.1	7.67613	-0.121033	0.263055	-0.460106	0.64544	1	FALSE
AC010677.5	1.5146	0.0122102	0.14868	0.0821238	0.934548	1	FALSE
AC010729.1	5.21899	-0.12276	0.24259	-0.506039	0.612829	1	FALSE
AC010729.2	13.3596	-0.0603412	0.284141	-0.212363	0.831824	1	FALSE
AC010731.4	0.36208	-0.0208048	0.0747832	-0.278202	0.780858	1	FALSE
AC010733.5	1.93896	-0.116015	0.158838	-0.730398	0.465147	1	FALSE
AC010761.10	1.00738	0.0163546	0.0986613	0.165765	0.868342	1	FALSE
AC010761.14	0.467133	-0.0214436	0.0748166	-0.286615	0.774407	1	FALSE
AC010761.6	1.17207	-0.00938259	0.125348	-0.0748522	0.940332	1	FALSE
AC010761.8	2.98623	-0.0365201	0.179864	-0.203043	0.839102	1	FALSE
AC010761.9	1.30006	0.0250377	0.0981343	0.255137	0.798617	1	FALSE
AC010878.3	2.60743	0.0166207	0.1838	0.0904283	0.927947	1	FALSE
AC010883.5	4.40872	-0.00520363	0.231651	-0.0224632	0.982078	1	FALSE
AC010884.1	5.08271	-0.187346	0.238671	-0.784952	0.432481	1	FALSE
AC010890.1	2.44401	0.15198	0.182722	0.831754	0.405548	1	FALSE
AC010894.3	13.4547	0.1657	0.289249	0.572862	0.566738	1	FALSE
AC010894.4	0.194744	-0.0210196	0.0747468	-0.281211	0.778549	1	FALSE
AC010900.2	5.22553	0.200277	0.228657	0.875883	0.381094	1	FALSE
AC010967.2	0.814489	0.0316797	0.100851	0.314125	0.753426	1	FALSE
AC010976.2	0.200215	0	0.0747468	0	1	1	FALSE
AC010983.1	0.411644	0.000285711	0.074792	0.00382008	0.996952	1	FALSE
AC011043.1	29.7431	-0.201639	0.307766	-0.65517	0.512358	1	FALSE
AC011286.1	1.79414	-0.0289246	0.15248	-0.189695	0.849548	1	FALSE
AC011290.4	1.10197	0.0432802	0.123375	0.350801	0.725737	1	FALSE
AC011290.5	1.67099	0.0176537	0.131728	0.134016	0.89339	1	FALSE
AC011298.2	2.09379	0.0526502	0.179014	0.294112	0.768672	1	FALSE
AC011330.13	0.622931	0.0634721	0.0994708	0.638098	0.52341	1	FALSE
AC011380.8	1.0291	0.0430544	0.13516	0.318544	0.750072	1	FALSE
AC011551.3	1.15879	-0.0299372	0.122741	-0.243905	0.807304	1	FALSE
AC011558.5	1.91136	-0.0300749	0.151127	-0.199004	0.84226	1	FALSE
AC011747.3	0.401933	-0.0180369	0.0752591	-0.239664	0.810591	1	FALSE
AC011747.4	2.16129	-0.139036	0.183345	-0.75833	0.448253	1	FALSE
AC011753.6	0.263023	0.0221355	0.0747468	0.29614	0.767123	1	FALSE
AC011841.1	0.189273	-0.0425971	0.0747468	-0.569886	0.568755	1	FALSE
AC011933.2	0.455213	-0.0178616	0.0752891	-0.237241	0.81247	1	FALSE
AC011997.1	0.263023	0.0221355	0.0747468	0.29614	0.767123	1	FALSE
AC011998.4	1.05322	-0.054805	0.111728	-0.49052	0.623766	1	FALSE
AC011999.1	0.612313	-0.0725963	0.0908868	-0.798755	0.424433	1	FALSE
AC012065.5	0.393622	0.0195696	0.0752638	0.260014	0.794853	1	FALSE
AC012066.1	2.14373	0.0827419	0.181117	0.456843	0.647784	1	FALSE
AC012074.2	2.3743	-0.0786356	0.174925	-0.44954	0.653042	1	FALSE
AC012123.1	0.613365	-0.0243671	0.0805365	-0.30256	0.762225	1	FALSE
AC012146.7	141.736	0.0419707	0.285903	0.146801	0.883289	1	FALSE
AC012314.20	0.200215	0	0.0747468	0	1	1	FALSE
AC012314.8	20.3132	-0.0593764	0.303372	-0.195721	0.844828	1	FALSE
AC012354.6	12.0251	-0.214398	0.280557	-0.764186	0.444756	1	FALSE
AC012354.8	10.0106	-0.0581758	0.270399	-0.215148	0.829652	1	FALSE
AC012358.4	4.99353	0.0160645	0.230693	0.0696358	0.944484	1	FALSE
AC012358.7	1.88894	0.177827	0.166082	1.07072	0.284296	1	FALSE
AC012358.8	1.44839	-0.0270103	0.151093	-0.178767	0.858121	1	FALSE
AC012360.4	1.13755	0.125319	0.120252	1.04214	0.297348	1	FALSE
AC012360.6	0.369759	-0.0212918	0.074792	-0.284681	0.775889	1	FALSE
AC012363.4	3.94508	-0.0888915	0.226979	-0.39163	0.695332	1	FALSE
AC012368.1	8.16244	-0.0185091	0.267861	-0.0690995	0.94491	1	FALSE
AC012370.2	0.207189	0	0.0747468	0	1	1	FALSE
AC012442.5	2.05245	0.0284231	0.173729	0.163606	0.870041	1	FALSE
AC012442.6	3.2904	-0.0386637	0.209817	-0.184273	0.853799	1	FALSE
AC012456.4	0.199546	0.0221355	0.0747468	0.29614	0.767123	1	FALSE
AC012462.1	0.867203	0.0391224	0.10291	0.380162	0.703825	1	FALSE
AC012462.2	1.93507	-0.0989904	0.165328	-0.598752	0.549338	1	FALSE
AC012485.2	1.00818	0.00147516	0.127807	0.0115421	0.990791	1	FALSE
AC012493.1	0.647388	0.0168349	0.0824012	0.204305	0.838115	1	FALSE
AC012499.1	0.240869	-0.0210196	0.0747468	-0.281211	0.778549	1	FALSE
AC012501.2	1.81519	0.1283	0.162193	0.79103	0.428926	1	FALSE
AC012501.3	30.4148	0.237498	0.307565	0.772189	0.440002	1	FALSE
AC012506.4	0.267443	0	0.0747468	0	1	1	FALSE
AC012512.1	0.263023	0.0221355	0.0747468	0.29614	0.767123	1	FALSE
AC012668.1	0.311537	0.000557948	0.0747468	0.00746451	0.994044	1	FALSE
AC012668.2	16.1521	-0.160613	0.297642	-0.539617	0.589461	1	FALSE
AC013267.1	0.194076	0.000557948	0.0747468	0.00746451	0.994044	1	FALSE
AC013268.3	0.80628	0.0588867	0.10046	0.586172	0.55776	1	FALSE
AC013275.2	0.345779	0.0220146	0.074767	0.294443	0.768419	1	FALSE
AC013404.1	1.09242	-0.0662943	0.120501	-0.550154	0.582214	1	FALSE
AC013429.5	0.240869	-0.0210196	0.0747468	-0.281211	0.778549	1	FALSE
AC013436.6	0.307296	0	0.074767	0	1	1	FALSE
AC013460.1	2.75465	0.164726	0.169283	0.973078	0.330515	1	FALSE
AC013461.1	1649.91	-0.337293	0.274131	-1.23041	0.218545	1	FALSE
AC013470.6	3.57774	-0.224757	0.201232	-1.1169	0.264036	1	FALSE
AC013472.3	0.606065	0.0618923	0.0906227	0.682967	0.494628	1	FALSE
AC013474.4	0.510415	0.0365241	0.076652	0.476492	0.633724	1	FALSE
AC013480.2	0.320724	0	0.0747468	0	1	1	FALSE
AC015849.12	0.207189	0	0.0747468	0	1	1	FALSE
AC015849.14	0.369759	-0.0212918	0.074792	-0.284681	0.775889	1	FALSE
AC015849.16	16.9149	-0.175463	0.280627	-0.625251	0.531806	1	FALSE
AC015849.2	2.02685	-0.0561588	0.153937	-0.364817	0.715248	1	FALSE
AC015922.7	0.320724	0	0.0747468	0	1	1	FALSE
AC015933.2	3.33988	-0.0522645	0.197933	-0.264052	0.79174	1	FALSE
AC015971.2	0.357659	0.000772735	0.0747832	0.010333	0.991756	1	FALSE
AC015977.5	0.595343	-0.00743772	0.0894292	-0.0831687	0.933717	1	FALSE
AC016292.3	0.802636	-0.0693198	0.110153	-0.629303	0.529151	1	FALSE
AC016549.1	0.500537	0	0.0755605	0	1	1	FALSE
AC016582.2	3.9466	0.0123616	0.199425	0.0619861	0.950574	1	FALSE
AC016700.4	0.662569	0.0269168	0.0850975	0.316306	0.751771	1	FALSE
AC016700.5	23.507	-0.0613523	0.291603	-0.210397	0.833358	1	FALSE
AC016700.6	2.12642	-0.0762129	0.171723	-0.443813	0.657178	1	FALSE
AC016712.2	16.7355	-0.158704	0.257476	-0.616385	0.53764	1	FALSE
AC016716.1	1.84115	0.0108874	0.152603	0.0713447	0.943123	1	FALSE
AC016722.3	0.198878	0.043713	0.0747468	0.584815	0.558672	1	FALSE
AC016722.4	0.560792	0	0.0756763	0	1	1	FALSE
AC016723.4	3.28453	0.0736599	0.180273	0.408602	0.682832	1	FALSE
AC016730.1	0.214163	0	0.0747468	0	1	1	FALSE
AC016734.2	1.61979	-0.0873751	0.145707	-0.599663	0.548731	1	FALSE
AC016735.1	3.12948	0.171216	0.202409	0.845892	0.397613	1	FALSE
AC016738.4	0.301826	-0.0208048	0.0747832	-0.278202	0.780858	1	FALSE
AC016739.2	59.6328	0.105394	0.302621	0.34827	0.727637	1	FALSE
AC016747.3	315.801	0.207184	0.269382	0.769108	0.441829	1	FALSE
AC016757.3	10.5361	0.123327	0.283869	0.43445	0.663962	1	FALSE
AC016894.1	0.649325	-0.00793609	0.0924039	-0.0858848	0.931558	1	FALSE
AC016907.3	1.14988	-0.0714585	0.122582	-0.582946	0.559929	1	FALSE
AC016910.1	0.250578	0.000557948	0.0747468	0.00746451	0.994044	1	FALSE
AC016995.3	0.189273	-0.0425971	0.0747468	-0.569886	0.568755	1	FALSE
AC016999.2	0.194744	-0.0210196	0.0747468	-0.281211	0.778549	1	FALSE
AC017028.1	0.198878	0.043713	0.0747468	0.584815	0.558672	1	FALSE
AC017048.1	0.831946	-0.0576035	0.109641	-0.525384	0.599316	1	FALSE
AC017060.1	0.448406	0.0220146	0.074767	0.294443	0.768419	1	FALSE
AC017074.2	2.65748	0.0720104	0.198878	0.362082	0.71729	1	FALSE
AC017079.4	0.518021	0.00576255	0.0849487	0.0678356	0.945916	1	FALSE
AC017083.2	0.872113	-0.0551142	0.111616	-0.493784	0.621459	1	FALSE
AC017104.6	4.2518	-0.161493	0.217954	-0.740949	0.458724	1	FALSE
AC018359.1	0.260469	0	0.0747468	0	1	1	FALSE
AC018442.1	0.306628	0.0220146	0.074767	0.294443	0.768419	1	FALSE
AC018462.2	29.3712	0.506606	0.306644	1.6521	0.0985148	1	FALSE
AC018463.5	0.547845	0.0410361	0.0778226	0.527303	0.597983	1	FALSE
AC018641.7	5.46733	0.143149	0.21632	0.661744	0.508135	1	FALSE
AC018737.3	0.194744	-0.0210196	0.0747468	-0.281211	0.778549	1	FALSE
AC018755.16	11.8501	0.352423	0.232321	1.51696	0.129276	1	FALSE
AC018755.17	0.457421	-0.0463724	0.0819798	-0.565656	0.571628	1	FALSE
AC018766.6	3.20704	0.064158	0.158635	0.404438	0.685891	1	FALSE
AC018799.1	0.834683	-0.0334465	0.108629	-0.307897	0.758161	1	FALSE
AC018816.3	1.46851	-0.00812923	0.161217	-0.0504243	0.959784	1	FALSE
AC018865.5	0.403436	-0.0358456	0.0752706	-0.476224	0.633915	1	FALSE
AC018890.6	0.356156	0.0220146	0.074767	0.294443	0.768419	1	FALSE
AC019050.1	2.02954	-0.0794893	0.160988	-0.493758	0.621477	1	FALSE
AC019097.7	0.829558	0.0110743	0.108548	0.102022	0.918739	1	FALSE
AC019109.1	0.254999	-0.0210196	0.0747468	-0.281211	0.778549	1	FALSE
AC019118.3	0.189273	-0.0425971	0.0747468	-0.569886	0.568755	1	FALSE
AC019129.1	1.48639	0.0167673	0.149736	0.111979	0.91084	1	FALSE
AC019172.2	0.24634	0	0.0747468	0	1	1	FALSE
AC019181.3	0.800464	-0.0218329	0.109934	-0.1986	0.842576	1	FALSE
AC019186.1	0.476665	0.0220146	0.074767	0.294443	0.768419	1	FALSE
AC020550.7	0.662784	0.0514191	0.0929366	0.55327	0.580078	1	FALSE
AC020594.5	0.445322	-0.0138503	0.0753148	-0.183898	0.854093	1	FALSE
AC020951.1	0.263023	0.0221355	0.0747468	0.29614	0.767123	1	FALSE
AC020983.5	0.711298	0.0207593	0.0951795	0.218107	0.827346	1	FALSE
AC021016.7	1.04155	0.0638234	0.127263	0.501508	0.616014	1	FALSE
AC021188.4	0.263023	0.0221355	0.0747468	0.29614	0.767123	1	FALSE
AC022007.5	10.2041	0.0562555	0.272016	0.20681	0.836158	1	FALSE
AC022153.1	0.262677	-0.0210196	0.0747468	-0.281211	0.778549	1	FALSE
AC022154.7	2.50973	0.173045	0.182048	0.950544	0.341836	1	FALSE
AC022182.1	2.82696	0.0340793	0.191675	0.177797	0.858883	1	FALSE
AC022182.2	10.3775	0.0925359	0.281203	0.329071	0.742102	1	FALSE
AC022201.5	3.75949	0.149474	0.220526	0.677806	0.497895	1	FALSE
AC022210.2	3.13414	-0.0565714	0.202728	-0.279051	0.780206	1	FALSE
AC022819.3	0.913259	0.0674449	0.104238	0.647031	0.517612	1	FALSE
AC023115.2	0.556537	0.0513211	0.0883264	0.581039	0.561214	1	FALSE
AC024082.4	0.250578	0.000557948	0.0747468	0.00746451	0.994044	1	FALSE
AC024560.2	0.345215	-0.0201776	0.0747941	-0.269775	0.787333	1	FALSE
AC024560.3	284.662	-0.244456	0.305056	-0.801347	0.422931	1	FALSE
AC024592.9	1.71299	0.0565603	0.161002	0.351302	0.725362	1	FALSE
AC024704.2	0.600213	-0.0250893	0.0804078	-0.312026	0.755021	1	FALSE
AC024937.6	0.189273	-0.0425971	0.0747468	-0.569886	0.568755	1	FALSE
AC025165.8	0.255703	-0.0210196	0.0747468	-0.281211	0.778549	1	FALSE
AC025171.1	10.9784	0.118237	0.273004	0.433096	0.664945	1	FALSE
AC025335.1	82.6525	-0.285756	0.290012	-0.985326	0.324464	1	FALSE
AC025442.3	0.355142	0.000285724	0.074792	0.00382025	0.996952	1	FALSE
AC025750.5	0.467133	-0.0214436	0.0748166	-0.286615	0.774407	1	FALSE
AC025918.2	0.355106	-0.0208048	0.0747832	-0.278202	0.780858	1	FALSE
AC026202.3	1.42991	0.150628	0.134852	1.11698	0.264001	1	FALSE
AC026271.5	80.9376	-0.148153	0.307275	-0.482152	0.629698	1	FALSE
AC026471.6	0.415396	0.000285711	0.074792	0.00382008	0.996952	1	FALSE
AC026954.6	0.548166	-0.020464	0.0871569	-0.234795	0.814368	1	FALSE
AC027119.1	0.267443	0	0.0747468	0	1	1	FALSE
AC027601.1	0.990133	-0.0244404	0.0881289	-0.277326	0.78153	1	FALSE
AC027612.1	1.29231	0.0311306	0.14698	0.211802	0.832261	1	FALSE
AC034187.2	0.512097	0.0435337	0.0754463	0.577015	0.563929	1	FALSE
AC034220.3	8.90836	-0.0343311	0.255656	-0.134286	0.893176	1	FALSE
AC034243.1	9.75355	-0.071476	0.279182	-0.256019	0.797936	1	FALSE
AC046143.3	10.0896	0.0946042	0.268195	0.352743	0.724281	1	FALSE
AC053503.4	1.66651	0.0305353	0.162457	0.187959	0.850909	1	FALSE
AC055764.1	0.240869	-0.0210196	0.0747468	-0.281211	0.778549	1	FALSE
AC055866.1	0.194744	-0.0210196	0.0747468	-0.281211	0.778549	1	FALSE
AC060834.2	7.29536	-0.00808441	0.263878	-0.0306369	0.975559	1	FALSE
AC060834.3	17.0075	-0.0286385	0.300963	-0.095156	0.924191	1	FALSE
AC061961.2	1.039	0.0287271	0.129202	0.222343	0.824047	1	FALSE
AC061992.2	4.22267	0.0717602	0.216471	0.331501	0.740266	1	FALSE
AC062017.1	3.26519	-0.0782686	0.193836	-0.403787	0.686369	1	FALSE
AC062028.1	1.65459	-0.00757706	0.159095	-0.0476261	0.962014	1	FALSE
AC062029.1	23.9464	-0.335543	0.307152	-1.09244	0.274642	1	FALSE
AC064836.3	0.824792	-0.0187473	0.100414	-0.186701	0.851895	1	FALSE
AC064850.4	3.70659	0.169632	0.200031	0.848026	0.396423	1	FALSE
AC064852.4	0.311882	0.043713	0.0747468	0.584815	0.558672	1	FALSE
AC067945.3	12.1381	0.109178	0.291011	0.375167	0.707536	1	FALSE
AC067945.4	0.316303	0.0221355	0.0747468	0.29614	0.767123	1	FALSE
AC067959.1	0.91996	-0.0273563	0.102119	-0.267887	0.788786	1	FALSE
AC068042.1	0.194076	0.000557948	0.0747468	0.00746451	0.994044	1	FALSE
AC068134.10	2.88517	0.00137648	0.187425	0.00734419	0.99414	1	FALSE
AC068137.13	0.369759	-0.0212918	0.074792	-0.284681	0.775889	1	FALSE
AC068282.3	19.7889	-0.31138	0.301245	-1.03364	0.301302	1	FALSE
AC068490.1	98.6446	0.0131929	0.307504	0.0429033	0.965779	1	FALSE
AC068490.2	268.806	0.125293	0.296099	0.423145	0.67219	1	FALSE
AC068491.3	0.931182	-0.111634	0.0966282	-1.15529	0.247972	1	FALSE
AC068492.1	0.564503	-0.0494031	0.0878571	-0.562312	0.573904	1	FALSE
AC068499.10	4.37005	-0.16774	0.223013	-0.752152	0.451959	1	FALSE
AC068538.2	0.51291	-0.0621837	0.0767838	-0.809854	0.418024	1	FALSE
AC068580.5	2.41926	0.0159339	0.18846	0.0845477	0.932621	1	FALSE
AC068580.6	2.25352	0.11283	0.132221	0.853343	0.393469	1	FALSE
AC068831.10	9.06996	-0.227045	0.274186	-0.82807	0.407631	1	FALSE
AC068831.15	0.189273	-0.0425971	0.0747468	-0.569886	0.568755	1	FALSE
AC068831.16	3.24416	0.016241	0.194884	0.0833372	0.933583	1	FALSE
AC068831.3	1.26963	-0.0523706	0.146102	-0.358452	0.720005	1	FALSE
AC068831.6	2.8564	-0.00411814	0.167723	-0.0245532	0.980411	1	FALSE
AC068858.1	0.20652	0.0221355	0.0747468	0.29614	0.767123	1	FALSE
AC069154.4	0.410594	-0.0422661	0.0748032	-0.56503	0.572053	1	FALSE
AC069155.1	6.60674	-0.0141066	0.238314	-0.0591936	0.952798	1	FALSE
AC069257.6	1.11775	-0.0401126	0.119127	-0.336722	0.736326	1	FALSE
AC069277.2	7.99671	-0.011053	0.257977	-0.0428448	0.965825	1	FALSE
AC069368.3	2.39247	0.000415434	0.157517	0.00263739	0.997896	1	FALSE
AC069513.4	1.0645	0.0434158	0.108433	0.400394	0.688866	1	FALSE
AC072052.7	7.05132	-0.0203746	0.249889	-0.0815346	0.935017	1	FALSE
AC072062.1	4.88691	0.0770571	0.239122	0.322251	0.747263	1	FALSE
AC072062.3	0.669379	-0.0372283	0.101485	-0.366836	0.713741	1	FALSE
AC073043.1	3.06155	-0.182417	0.203024	-0.898502	0.368918	1	FALSE
AC073046.25	28.0139	-0.0661243	0.291234	-0.227049	0.820386	1	FALSE
AC073052.1	2.4071	-0.160385	0.192194	-0.834494	0.404002	1	FALSE
AC073063.10	6.74949	-0.0627667	0.254897	-0.246243	0.805494	1	FALSE
AC073069.2	0.397755	0.0748087	0.0752492	0.994145	0.320152	1	FALSE
AC073071.1	24.8666	0.31086	0.290593	1.06974	0.284734	1	FALSE
AC073072.5	1.17569	-0.0330465	0.13205	-0.250257	0.802389	1	FALSE
AC073072.7	1.27566	0.0160987	0.138093	0.116579	0.907193	1	FALSE
AC073109.2	0.36208	-0.0208048	0.0747832	-0.278202	0.780858	1	FALSE
AC073130.1	0.250578	0.000557948	0.0747468	0.00746451	0.994044	1	FALSE
AC073133.1	3.3532	-0.109499	0.196934	-0.55602	0.578197	1	FALSE
AC073133.2	0.92237	0.0621109	0.115949	0.535675	0.592183	1	FALSE
AC073150.6	0.263023	0.0221355	0.0747468	0.29614	0.767123	1	FALSE
AC073257.2	0.200215	0	0.0747468	0	1	1	FALSE
AC073283.4	88.1794	0.0245651	0.29925	0.0820891	0.934576	1	FALSE
AC073283.7	0.811369	0.0103179	0.101573	0.101582	0.919089	1	FALSE
AC073316.1	0.714346	0.0222973	0.0960985	0.232026	0.816518	1	FALSE
AC073321.4	1.35016	0.0733577	0.133105	0.551127	0.581547	1	FALSE
AC073326.3	0.82427	-0.0584831	0.108361	-0.539705	0.5894	1	FALSE
AC073333.8	0.791665	0.0324794	0.0889897	0.36498	0.715127	1	FALSE
AC073342.12	2.30277	-0.128579	0.17787	-0.722882	0.469752	1	FALSE
AC073343.13	13.0937	-0.0127145	0.285748	-0.0444954	0.964509	1	FALSE
AC073387.2	0.399093	0.0377616	0.0752579	0.501763	0.615835	1	FALSE
AC073410.1	7.24377	0.379699	0.247068	1.53682	0.124338	1	FALSE
AC073415.2	5.63314	0.0582459	0.243104	0.239593	0.810646	1	FALSE
AC073465.1	0.260469	0	0.0747468	0	1	1	FALSE
AC073465.3	0.710067	-0.0348275	0.105112	-0.331336	0.740391	1	FALSE
AC073551.1	0.360577	0	0.074766	0	1	1	FALSE
AC073842.19	0.518403	0.0635349	0.0771289	0.82375	0.410082	1	FALSE
AC073869.2	0.776806	0.0371111	0.107961	0.343744	0.731039	1	FALSE
AC073900.4	0.374525	0	0.074767	0	1	1	FALSE
AC074019.2	0.698291	-0.0854196	0.104552	-0.817005	0.413926	1	FALSE
AC074117.10	148.067	0.0365557	0.271868	0.134461	0.893038	1	FALSE
AC074117.13	1.07691	-0.0206369	0.119849	-0.172191	0.863288	1	FALSE
AC074141.3	81.0243	0.426264	0.304736	1.3988	0.161873	1	FALSE
AC074212.5	48.7572	0.232906	0.307197	0.758165	0.448352	1	FALSE
AC074212.6	7.96068	0.186651	0.261036	0.71504	0.474584	1	FALSE
AC074286.1	40.0505	-0.0451858	0.307907	-0.146751	0.883328	1	FALSE
AC074289.1	43.7994	0.0985871	0.305876	0.32231	0.747218	1	FALSE
AC074366.3	1.22854	0.122899	0.128913	0.953353	0.340411	1	FALSE
AC074367.1	0.449743	-0.0356407	0.0752882	-0.473391	0.635935	1	FALSE
AC074391.1	2.99561	-0.0542667	0.181993	-0.29818	0.765566	1	FALSE
AC078852.1	2.95796	0.0740355	0.189861	0.389945	0.696577	1	FALSE
AC078852.2	0.568636	0.0106431	0.0789946	0.134732	0.892824	1	FALSE
AC078883.3	12.0627	-0.513018	0.284817	-1.80122	0.0716686	1	FALSE
AC078883.4	0.446555	0	0.0752878	0	1	1	FALSE
AC078899.1	19.8884	-0.0888438	0.257412	-0.345142	0.729987	1	FALSE
AC078899.3	7.48312	0.0221526	0.251494	0.088084	0.92981	1	FALSE
AC078899.4	0.194076	0.000557948	0.0747468	0.00746451	0.994044	1	FALSE
AC078941.1	45.7843	0.15938	0.307579	0.518176	0.604336	1	FALSE
AC079145.4	2.59627	0.0767943	0.170329	0.450859	0.652091	1	FALSE
AC079150.2	7.44306	0.389516	0.228042	1.70809	0.0876194	1	FALSE
AC079150.3	0.460016	0.0187113	0.0753111	0.248454	0.803783	1	FALSE
AC079199.2	0.250232	-0.0425971	0.0747468	-0.569886	0.568755	1	FALSE
AC079248.1	0.3088	-0.0208048	0.0747832	-0.278202	0.780858	1	FALSE
AC079250.1	3.63261	-0.0698067	0.201841	-0.345849	0.729456	1	FALSE
AC079305.10	4.36977	0.031957	0.185947	0.171861	0.863547	1	FALSE
AC079354.3	2.66971	-0.0599269	0.187266	-0.32001	0.748961	1	FALSE
AC079354.5	1.27765	0.0122119	0.136663	0.0893576	0.928798	1	FALSE
AC079586.1	0.982171	0.107693	0.118759	0.906822	0.364501	1	FALSE
AC079610.2	0.510379	0.0281563	0.0847854	0.332089	0.739822	1	FALSE
AC079630.4	0.457098	0.02641	0.081993	0.322101	0.747376	1	FALSE
AC079741.2	0.250578	0.000557948	0.0747468	0.00746451	0.994044	1	FALSE
AC079742.4	0.840177	0.0204561	0.100996	0.202544	0.839491	1	FALSE
AC079776.1	1.88008	-0.0870873	0.154598	-0.563313	0.573222	1	FALSE
AC079776.2	1.08974	0.00235935	0.110132	0.021423	0.982908	1	FALSE
AC079776.4	2.15246	-0.0940208	0.166515	-0.56464	0.572319	1	FALSE
AC079779.4	0.253314	0	0.0747468	0	1	1	FALSE
AC079779.5	0.207189	0	0.0747468	0	1	1	FALSE
AC079780.3	0.988235	0	0.101079	0	1	1	FALSE
AC079781.8	0.360577	0	0.074766	0	1	1	FALSE
AC079807.1	0.262677	-0.0210196	0.0747468	-0.281211	0.778549	1	FALSE
AC079807.2	8.92047	-0.0340575	0.269594	-0.126329	0.899472	1	FALSE
AC079807.4	1.47582	0.131631	0.14214	0.926065	0.354412	1	FALSE
AC079834.1	0.366882	0.0220146	0.074767	0.294443	0.768419	1	FALSE
AC079896.1	34.6735	0.00744831	0.306902	0.0242693	0.980638	1	FALSE
AC079922.2	1.91326	-0.0547822	0.158071	-0.346567	0.728916	1	FALSE
AC079922.3	28.7021	0.310879	0.307838	1.00988	0.312554	1	FALSE
AC080094.1	0.553984	0.022296	0.0874279	0.255022	0.798706	1	FALSE
AC080125.1	0.357314	-0.0422661	0.0748032	-0.56503	0.572053	1	FALSE
AC083843.1	141.198	0.207626	0.306521	0.677364	0.498175	1	FALSE
AC083843.2	0.723657	-0.0290288	0.0866629	-0.334962	0.737653	1	FALSE
AC083843.4	2.93955	0.0935701	0.173676	0.538762	0.590051	1	FALSE
AC083873.4	8.57574	-0.160159	0.232702	-0.688258	0.49129	1	FALSE
AC083884.8	1.74461	0.0674032	0.118145	0.570513	0.56833	1	FALSE
AC083899.1	0.302174	0.0221355	0.0747468	0.29614	0.767123	1	FALSE
AC083899.3	31.4056	-0.0706524	0.307517	-0.229751	0.818285	1	FALSE
AC083900.1	0.710975	0.0857841	0.0878836	0.97611	0.32901	1	FALSE
AC083949.1	0.40891	-0.0212918	0.074792	-0.284681	0.775889	1	FALSE
AC084082.3	0.435613	-0.0355665	0.0752946	-0.472364	0.636667	1	FALSE
AC084117.3	1.57472	-0.0361442	0.154426	-0.234055	0.814942	1	FALSE
AC084149.2	1.03153	-0.0158968	0.107089	-0.148445	0.881992	1	FALSE
AC084219.4	172.598	-0.150109	0.288724	-0.519905	0.60313	1	FALSE
AC084809.2	10.1255	-0.0167568	0.276411	-0.0606226	0.95166	1	FALSE
AC084809.3	5.17172	-0.17149	0.23512	-0.729375	0.465772	1	FALSE
AC087073.1	80.3296	0.159311	0.307906	0.5174	0.604877	1	FALSE
AC087163.2	0.868221	0.00146415	0.120362	0.0121646	0.990294	1	FALSE
AC087163.3	1.21149	-0.0285607	0.104014	-0.274585	0.783635	1	FALSE
AC087294.2	3.39036	0.0387454	0.212658	0.182196	0.855429	1	FALSE
AC087350.1	0.496918	0.00542728	0.0838675	0.0647125	0.948403	1	FALSE
AC087491.2	0.25538	0.043713	0.0747468	0.584815	0.558672	1	FALSE
AC087499.10	0.715504	-0.0314489	0.0955753	-0.329048	0.742119	1	FALSE
AC087499.4	0.256049	0.0221355	0.0747468	0.29614	0.767123	1	FALSE
AC087499.5	0.340308	0.000772735	0.0747832	0.010333	0.991756	1	FALSE
AC087650.1	1.88591	-0.107317	0.174752	-0.614113	0.539141	1	FALSE
AC090286.2	0.75882	0.0619979	0.0984817	0.629537	0.528998	1	FALSE
AC090453.1	0.201718	-0.0210196	0.0747468	-0.281211	0.778549	1	FALSE
AC090498.1	6.13929	0.0413594	0.251382	0.164528	0.869316	1	FALSE
AC090505.5	1.80481	0.160301	0.157933	1.01499	0.310109	1	FALSE
AC090505.6	0.661068	0.0120958	0.0922151	0.131169	0.895642	1	FALSE
AC090587.4	8.67363	0.1614	0.263678	0.612111	0.540464	1	FALSE
AC090587.5	0.765068	-0.0370783	0.0984188	-0.37674	0.706367	1	FALSE
AC090616.2	14.508	0.00685842	0.282364	0.0242893	0.980622	1	FALSE
AC090804.1	1.6484	-0.183528	0.149072	-1.23113	0.218274	1	FALSE
AC091133.1	7.65102	0.0906555	0.266513	0.340155	0.73374	1	FALSE
AC091492.2	0.387102	-0.0208048	0.0747832	-0.278202	0.780858	1	FALSE
AC091633.2	3.77267	0.0936319	0.21161	0.442474	0.658146	1	FALSE
AC091633.3	3.00824	-0.109588	0.202106	-0.542232	0.587658	1	FALSE
AC091654.7	48.9326	-0.0643344	0.148651	-0.43279	0.665168	1	FALSE
AC091729.7	4.97482	0.010368	0.240418	0.043125	0.965602	1	FALSE
AC091729.9	150.829	0.0116993	0.306717	0.0381437	0.969573	1	FALSE
AC091878.1	11.2926	-0.0554388	0.266912	-0.207704	0.83546	1	FALSE
AC091962.3	1.208	-0.00978775	0.133747	-0.0731813	0.941662	1	FALSE
AC092066.1	70.7222	0.131791	0.307458	0.428647	0.66818	1	FALSE
AC092106.1	0.921112	-0.0851117	0.105607	-0.805927	0.420285	1	FALSE
AC092155.1	0.44911	-0.00229191	0.0753432	-0.0304196	0.975732	1	FALSE
AC092159.2	5.29278	-0.0460077	0.237167	-0.193988	0.846185	1	FALSE
AC092162.1	1.68442	-0.123702	0.139227	-0.888496	0.374274	1	FALSE
AC092171.2	5.36403	-0.122987	0.243268	-0.505564	0.613163	1	FALSE
AC092171.4	0.350685	0.000772735	0.0747832	0.010333	0.991756	1	FALSE
AC092198.1	7.49535	0.325624	0.254228	1.28083	0.200252	1	FALSE
AC092295.4	0.544415	-0.0479731	0.0876565	-0.547285	0.584183	1	FALSE
AC092316.1	0.39429	0.000886099	0.0752487	0.0117756	0.990605	1	FALSE
AC092535.3	0.994217	0.0581322	0.110874	0.524307	0.600065	1	FALSE
AC092569.2	7.25091	0.000562013	0.243181	0.00231109	0.998156	1	FALSE
AC092570.3	0.315958	-0.0210196	0.0747468	-0.281211	0.778549	1	FALSE
AC092573.2	3.02668	-0.0625588	0.2052	-0.304867	0.760467	1	FALSE
AC092610.12	1.53192	-0.183426	0.149892	-1.22372	0.221058	1	FALSE
AC092614.2	22.9716	-0.317839	0.302502	-1.0507	0.293395	1	FALSE
AC092620.2	0.797516	0.0632435	0.0805565	0.785083	0.432405	1	FALSE
AC092620.3	0.773783	0.112375	0.0914391	1.22896	0.219086	1	FALSE
AC092625.1	0.751845	0.060714	0.0973635	0.623581	0.532903	1	FALSE
AC092641.2	0.194744	-0.0210196	0.0747468	-0.281211	0.778549	1	FALSE
AC092642.1	2.19964	-0.013375	0.183282	-0.0729751	0.941826	1	FALSE
AC092646.1	0.255703	-0.0210196	0.0747468	-0.281211	0.778549	1	FALSE
AC092646.2	0.615611	-0.00850555	0.0910242	-0.0934428	0.925552	1	FALSE
AC092664.1	0.821915	0.00125052	0.1106	0.0113067	0.990979	1	FALSE
AC092669.6	1.67036	-0.0764039	0.156235	-0.48903	0.62482	1	FALSE
AC092687.5	0.403436	-0.0358456	0.0752706	-0.476224	0.633915	1	FALSE
AC092755.4	0.415361	-0.0208048	0.0747832	-0.278202	0.780858	1	FALSE
AC092798.2	0.600572	-0.0847419	0.0822875	-1.02983	0.303091	1	FALSE
AC092835.2	56.1422	-0.042146	0.291143	-0.144761	0.8849	1	FALSE
AC093106.6	0.401231	-0.0208048	0.0747832	-0.278202	0.780858	1	FALSE
AC093107.7	0.737787	-0.00951347	0.0957309	-0.0993773	0.920839	1	FALSE
AC093110.3	0.460684	0	0.075269	0	1	1	FALSE
AC093142.2	1.19878	0.0776482	0.113522	0.683991	0.493981	1	FALSE
AC093159.1	3.46827	-0.160662	0.206222	-0.779075	0.435935	1	FALSE
AC093162.5	0.61904	0.0449655	0.0758858	0.592541	0.553488	1	FALSE
AC093323.3	334.333	0.184072	0.255294	0.721017	0.470899	1	FALSE
AC093375.1	44.4748	0.0132814	0.293164	0.0453036	0.963865	1	FALSE
AC093382.1	0.961875	0.00121698	0.116725	0.010426	0.991681	1	FALSE
AC093388.3	1.82988	0.0695121	0.138904	0.500433	0.616771	1	FALSE
AC093390.1	9.58924	0.165276	0.268386	0.615813	0.538018	1	FALSE
AC093495.4	1.51993	0.00189908	0.159492	0.011907	0.9905	1	FALSE
AC093616.4	0.556156	-0.0192478	0.0872945	-0.220493	0.825487	1	FALSE
AC093620.5	14.5788	-0.175131	0.298827	-0.586061	0.557835	1	FALSE
AC093627.10	13.1876	-0.247834	0.27942	-0.88696	0.3751	1	FALSE
AC093627.12	0.199546	0.0221355	0.0747468	0.29614	0.767123	1	FALSE
AC093627.7	0.75458	0.0749017	0.0893209	0.838568	0.401712	1	FALSE
AC093627.9	33.3456	-0.205048	0.307158	-0.667566	0.504411	1	FALSE
AC093642.1	1.91779	-0.00766338	0.166998	-0.0458891	0.963399	1	FALSE
AC093642.3	7.0676	-0.137109	0.263057	-0.521213	0.602218	1	FALSE
AC093642.5	11.5176	0.0908542	0.286931	0.316642	0.751516	1	FALSE
AC093673.5	286.511	0.101303	0.259157	0.390894	0.695876	1	FALSE
AC093698.1	1.04866	0.0116098	0.119759	0.0969436	0.922771	1	FALSE
AC093724.2	15.8207	0.24838	0.265579	0.935239	0.349665	1	FALSE
AC093818.1	127.837	-0.442476	0.307895	-1.4371	0.15069	1	FALSE
AC093838.4	616.67	-0.101261	0.294416	-0.343937	0.730894	1	FALSE
AC093850.1	0.349635	-0.0417551	0.0747941	-0.558267	0.576662	1	FALSE
AC093899.3	0.307296	0	0.074767	0	1	1	FALSE
AC093901.1	9.93839	-0.225529	0.275165	-0.819614	0.412436	1	FALSE
AC096574.4	2.81646	0.0733719	0.196049	0.374253	0.708216	1	FALSE
AC096574.5	30.1122	0.627604	0.302586	2.07413	0.0380669	1	FALSE
AC096649.1	1.91299	0.0257153	0.139005	0.184996	0.853233	1	FALSE
AC096649.2	0.869066	-0.0559555	0.112107	-0.499126	0.617691	1	FALSE
AC096664.1	1.75974	0.0119858	0.153149	0.0782623	0.937619	1	FALSE
AC096664.2	0.469198	-0.00342538	0.0753986	-0.0454303	0.963764	1	FALSE
AC096670.3	0.254999	-0.0210196	0.0747468	-0.281211	0.778549	1	FALSE
AC097374.2	0.306594	0	0.0747468	0	1	1	FALSE
AC097382.5	0.866535	0.0710687	0.113409	0.626658	0.530883	1	FALSE
AC097467.2	0.360577	0	0.074766	0	1	1	FALSE
AC097468.4	31.9281	-0.336233	0.307356	-1.09395	0.273976	1	FALSE
AC097468.7	0.20652	0.0221355	0.0747468	0.29614	0.767123	1	FALSE
AC097523.1	0.835028	0	0.102747	0	1	1	FALSE
AC097533.1	0.25538	0.043713	0.0747468	0.584815	0.558672	1	FALSE
AC097662.2	61.9623	-0.187405	0.293966	-0.637503	0.523797	1	FALSE
AC097711.1	0.734576	-0.0291439	0.0951127	-0.306414	0.759289	1	FALSE
AC097713.5	0.774106	0.0596628	0.10776	0.553665	0.579808	1	FALSE
AC097721.1	0.300322	0	0.0747656	0	1	1	FALSE
AC097721.2	4.63142	0.0174525	0.225602	0.0773596	0.938337	1	FALSE
AC097724.3	24.2797	0.138672	0.303768	0.456509	0.648024	1	FALSE
AC098614.1	0.255703	-0.0210196	0.0747468	-0.281211	0.778549	1	FALSE
AC098614.2	32.981	0.051963	0.307864	0.168786	0.865965	1	FALSE
AC098617.1	0.383349	-0.0352242	0.0752225	-0.468267	0.639594	1	FALSE
AC098820.2	0.256049	0.0221355	0.0747468	0.29614	0.767123	1	FALSE
AC098820.3	5.10862	0.0240259	0.232587	0.103298	0.917726	1	FALSE
AC098820.4	0.35924	0.0435922	0.074767	0.583041	0.559866	1	FALSE
AC098973.2	28.4481	0.0052815	0.307319	0.0171857	0.986288	1	FALSE
AC099535.4	1.31562	-0.0564826	0.135914	-0.415577	0.67772	1	FALSE
AC099668.5	0.311537	0.000557948	0.0747468	0.00746451	0.994044	1	FALSE
AC099754.1	0.200215	0	0.0747468	0	1	1	FALSE
AC099850.1	8.69687	-0.0990568	0.270388	-0.366351	0.714103	1	FALSE
AC100830.4	4.87493	0.0721638	0.222279	0.324653	0.745443	1	FALSE
AC100830.5	0.401613	0.0435922	0.074767	0.58304	0.559866	1	FALSE
AC104024.1	0.355811	-0.0212918	0.074792	-0.284681	0.775889	1	FALSE
AC104058.1	0.201718	-0.0210196	0.0747468	-0.281211	0.778549	1	FALSE
AC104076.2	0.347951	-0.0208048	0.0747832	-0.278202	0.780858	1	FALSE
AC104076.3	0.690325	0.0315176	0.0952364	0.33094	0.74069	1	FALSE
AC104131.1	0.302174	0.0221355	0.0747468	0.29614	0.767123	1	FALSE
AC104297.1	3.19451	0.00694039	0.187574	0.0370008	0.970484	1	FALSE
AC104304.4	46.9121	-0.114701	0.307634	-0.37285	0.70926	1	FALSE
AC104306.1	0.511047	0.00546442	0.0848059	0.0644345	0.948624	1	FALSE
AC104389.28	0.359908	0.0220146	0.074767	0.294443	0.768419	1	FALSE
AC104389.32	0.255703	-0.0210196	0.0747468	-0.281211	0.778549	1	FALSE
AC104451.2	0.198878	0.043713	0.0747468	0.584815	0.558672	1	FALSE
AC104532.3	0.200215	0	0.0747468	0	1	1	FALSE
AC104532.4	0.662751	0.032114	0.0932386	0.344428	0.730525	1	FALSE
AC104634.3	0.590541	-0.0493893	0.089929	-0.549203	0.582866	1	FALSE
AC104651.2	2.31513	-0.151367	0.165491	-0.914653	0.360374	1	FALSE
AC104653.1	0.784613	-0.0346903	0.0989147	-0.350709	0.725806	1	FALSE
AC104654.2	0.259801	0.0221355	0.0747468	0.29614	0.767123	1	FALSE
AC104655.3	12.1118	0.181695	0.271595	0.668992	0.503501	1	FALSE
AC104667.3	8.86643	0.132627	0.253495	0.523193	0.60084	1	FALSE
AC104809.4	0.374525	0	0.074767	0	1	1	FALSE
AC104820.2	0.200215	0	0.0747468	0	1	1	FALSE
AC104843.3	0.451951	-0.0566293	0.0753308	-0.751741	0.452207	1	FALSE
AC105339.1	0.659562	0.0354945	0.0847296	0.418915	0.675278	1	FALSE
AC105342.1	3.32797	0.0641645	0.203086	0.315947	0.752043	1	FALSE
AC105399.2	1.25528	0.114954	0.127965	0.898328	0.369011	1	FALSE
AC105402.2	1.18287	0.00197225	0.103562	0.0190442	0.984806	1	FALSE
AC105402.3	0.522823	0.0506909	0.0854897	0.592948	0.553216	1	FALSE
AC105760.2	11.3394	0.130079	0.276546	0.470371	0.63809	1	FALSE
AC105760.3	0.194076	0.000557948	0.0747468	0.00746451	0.994044	1	FALSE
AC106782.20	0.835029	0.0341198	0.108705	0.313876	0.753615	1	FALSE
AC106786.1	0.311537	0.000557948	0.0747468	0.00746451	0.994044	1	FALSE
AC106875.1	4.81063	0.00552825	0.186027	0.0297174	0.976292	1	FALSE
AC107081.5	0.399093	0.0377616	0.0752579	0.501763	0.615835	1	FALSE
AC107218.3	32.0726	-0.00348838	0.307148	-0.0113573	0.990938	1	FALSE
AC108004.3	0.298317	0.0649443	0.0747707	0.868579	0.385077	1	FALSE
AC108025.2	3.92596	-0.0606405	0.206745	-0.293311	0.769285	1	FALSE
AC108039.1	0.441084	-0.0177883	0.0753017	-0.236227	0.813257	1	FALSE
AC108039.3	0.467824	0.0652521	0.0747844	0.872537	0.382915	1	FALSE
AC108051.2	0.320724	0	0.0747468	0	1	1	FALSE
AC108051.3	0.589869	-0.0141023	0.0802102	-0.175817	0.860438	1	FALSE
AC108142.1	85.3766	0.0497367	0.294985	0.168608	0.866105	1	FALSE
AC108448.3	0.199546	0.0221355	0.0747468	0.29614	0.767123	1	FALSE
AC108463.2	1.3618	0.0404679	0.141161	0.286678	0.774359	1	FALSE
AC108479.2	0.661554	0.031551	0.0936028	0.337073	0.736062	1	FALSE
AC108488.4	28.3494	-0.195798	0.306482	-0.638858	0.522915	1	FALSE
AC108925.1	0.254999	-0.0210196	0.0747468	-0.281211	0.778549	1	FALSE
AC109333.10	1.52133	0.040033	0.146466	0.273326	0.784603	1	FALSE
AC109631.1	0.302174	0.0221355	0.0747468	0.29614	0.767123	1	FALSE
AC109642.1	3.75686	-0.0265373	0.223808	-0.118572	0.905615	1	FALSE
AC109815.2	1.61885	-0.00789815	0.147499	-0.0535473	0.957296	1	FALSE
AC110299.5	0.41063	-0.0214436	0.0748166	-0.286615	0.774407	1	FALSE
AC110615.1	0.262677	-0.0210196	0.0747468	-0.281211	0.778549	1	FALSE
AC110781.3	0.855848	0.00228581	0.100687	0.0227023	0.981888	1	FALSE
AC110926.4	0.703441	0.0210956	0.0940833	0.224223	0.822584	1	FALSE
AC111155.1	0.518403	0.0635349	0.0771289	0.82375	0.410082	1	FALSE
AC111200.7	0.267443	0	0.0747468	0	1	1	FALSE
AC112198.1	0.198878	0.043713	0.0747468	0.584815	0.558672	1	FALSE
AC112229.1	0.92311	0.0160254	0.0939788	0.170522	0.8646	1	FALSE
AC112497.1	1.09918	0.0371997	0.0915184	0.406472	0.684396	1	FALSE
AC112715.2	0.508349	-0.00462965	0.0847266	-0.0546422	0.956424	1	FALSE
AC113189.5	132.569	0.097299	0.281803	0.345273	0.729889	1	FALSE
AC113404.1	5.02292	0.0336306	0.232225	0.144819	0.884854	1	FALSE
AC113607.2	0.240869	-0.0210196	0.0747468	-0.281211	0.778549	1	FALSE
AC114271.2	150.633	0.0122219	0.305299	0.0400326	0.968067	1	FALSE
AC114730.2	2.65661	-0.0247352	0.191413	-0.129224	0.89718	1	FALSE
AC114730.3	9.17032	0.0940168	0.239731	0.392176	0.694928	1	FALSE
AC114730.8	0.497863	0.0656858	0.0756338	0.868471	0.385136	1	FALSE
AC114755.3	0.20652	0.0221355	0.0747468	0.29614	0.767123	1	FALSE
AC114755.7	0.296355	-0.0417551	0.0747941	-0.558267	0.576662	1	FALSE
AC114776.3	0.200215	0	0.0747468	0	1	1	FALSE
AC114803.3	26.1524	-0.316956	0.24842	-1.27589	0.201996	1	FALSE
AC114877.3	0.703786	0.0677335	0.0857952	0.789478	0.429833	1	FALSE
AC115617.2	2.38075	-0.0360221	0.185426	-0.194266	0.845967	1	FALSE
AC116035.1	1.82582	-0.0551757	0.16568	-0.333026	0.739115	1	FALSE
AC116366.6	0.301828	-0.0210196	0.0747468	-0.281211	0.778549	1	FALSE
AC116609.2	11.5087	0.0852213	0.272269	0.313003	0.754278	1	FALSE
AC116609.3	0.349635	-0.0417551	0.0747941	-0.558267	0.576662	1	FALSE
AC116614.1	11.726	-0.105728	0.288375	-0.366634	0.713892	1	FALSE
AC117947.1	0.791665	0.0324794	0.0889897	0.36498	0.715127	1	FALSE
AC123023.1	3.24689	-0.100777	0.204056	-0.49387	0.621398	1	FALSE
AC123886.2	0.59797	0.0588376	0.075929	0.774903	0.438397	1	FALSE
AC124789.1	17.9106	0.180105	0.2853	0.631284	0.527855	1	FALSE
AC124944.3	0.438698	0	0.074767	0	1	1	FALSE
AC124944.5	25.1713	0.540698	0.30743	1.75877	0.0786172	1	FALSE
AC125232.1	50.6775	0.302594	0.301971	1.00206	0.316313	1	FALSE
AC125238.2	2.00126	-0.227115	0.161916	-1.40267	0.160715	1	FALSE
AC126544.4	3.42556	-0.0592578	0.169024	-0.350587	0.725898	1	FALSE
AC127904.2	5.27901	0.225431	0.227238	0.992052	0.321172	1	FALSE
AC129492.1	0.555357	-0.00586819	0.0783854	-0.0748633	0.940323	1	FALSE
AC129492.6	31.4376	-0.155326	0.307671	-0.504845	0.613668	1	FALSE
AC131056.3	0.355487	0.0435922	0.074767	0.583041	0.559866	1	FALSE
AC131097.4	1.38488	-0.0231315	0.139865	-0.165385	0.868641	1	FALSE
AC132008.1	1.03405	-0.00925796	0.118524	-0.0781107	0.93774	1	FALSE
AC133644.3	0.240869	-0.0210196	0.0747468	-0.281211	0.778549	1	FALSE
AC133680.1	0.408907	-0.0178937	0.0752836	-0.237683	0.812127	1	FALSE
AC133785.1	1.4303	0.0989641	0.131898	0.750308	0.453069	1	FALSE
AC136289.1	1.2181	0.0388711	0.136034	0.285746	0.775073	1	FALSE
AC136352.3	25.1938	-0.274837	0.296097	-0.928198	0.353305	1	FALSE
AC137723.5	2.76363	-0.0892439	0.188451	-0.473566	0.63581	1	FALSE
AC137932.4	2.96164	-0.0591589	0.195833	-0.302089	0.762584	1	FALSE
AC137932.5	1.13265	0.0215951	0.12046	0.179272	0.857724	1	FALSE
AC137932.6	1.37526	0.0590276	0.127747	0.462067	0.644033	1	FALSE
AC137934.1	1.2899	-0.0613368	0.126788	-0.483776	0.628545	1	FALSE
AC138035.2	17.7929	-0.161224	0.265816	-0.606525	0.544166	1	FALSE
AC138430.4	5.41346	-0.153319	0.239996	-0.638842	0.522925	1	FALSE
AC138517.4	1.05525	-0.0531036	0.119291	-0.445162	0.656203	1	FALSE
AC138517.6	0.305959	0.0435922	0.074767	0.583041	0.559866	1	FALSE
AC138623.1	0.201718	-0.0210196	0.0747468	-0.281211	0.778549	1	FALSE
AC138969.4	2.46292	-0.112682	0.164308	-0.685798	0.492841	1	FALSE
AC139100.3	0.796226	-0.0326951	0.108099	-0.302455	0.762305	1	FALSE
AC139100.4	18.0951	0.364786	0.271411	1.34404	0.178937	1	FALSE
AC139143.2	1.60524	-0.0167251	0.148719	-0.112461	0.910458	1	FALSE
AC139712.2	0.20652	0.0221355	0.0747468	0.29614	0.767123	1	FALSE
AC139887.4	1.18084	0.0751072	0.125264	0.599589	0.54878	1	FALSE
AC140076.1	0.663237	-0.0187738	0.0926667	-0.202595	0.839451	1	FALSE
AC140481.8	0.70449	0.0427965	0.0966328	0.442877	0.657854	1	FALSE
AC140542.2	42.5669	0.146921	0.307883	0.477198	0.633221	1	FALSE
AC141586.5	62.7835	0.194234	0.294082	0.660476	0.508948	1	FALSE
AC141928.1	198.864	0.0525055	0.266483	0.197031	0.843803	1	FALSE
AC141930.2	1.0284	0.0430982	0.117448	0.366954	0.713653	1	FALSE
AC142119.1	6.85263	-0.385298	0.250424	-1.53858	0.123906	1	FALSE
AC142472.6	46.9789	0.00880151	0.303755	0.0289757	0.976884	1	FALSE
AC142528.1	2.88594	-0.00641604	0.179107	-0.0358223	0.971424	1	FALSE
AC144449.1	5.41754	-0.160631	0.238417	-0.67374	0.500477	1	FALSE
AC144450.1	0.622898	0.0248741	0.0809484	0.307283	0.758628	1	FALSE
AC144450.2	0.810032	0.0616654	0.111276	0.554166	0.579465	1	FALSE
AC144530.1	13.8865	0.435108	0.266226	1.63436	0.102184	1	FALSE
AC144652.1	83.1534	-0.202038	0.291912	-0.69212	0.488862	1	FALSE
AC144831.1	1.47397	0.059154	0.143345	0.412668	0.67985	1	FALSE
AC144831.3	0.255035	0.000557948	0.0747468	0.00746451	0.994044	1	FALSE
AC145124.2	3.87239	0.160203	0.225253	0.711213	0.476952	1	FALSE
AC145343.2	0.959812	-0.0645426	0.118175	-0.54616	0.584956	1	FALSE
AC156455.1	12.0441	0.0863858	0.282443	0.305852	0.759717	1	FALSE
AC159540.1	3.21498	-0.0185259	0.206915	-0.0895338	0.928658	1	FALSE
AC213203.1	0.712097	0.0122777	0.104176	0.117855	0.906182	1	FALSE
AC226118.1	7.15728	-0.204038	0.262368	-0.777679	0.436758	1	FALSE
AC226119.4	0.756409	-0.0171796	0.0964797	-0.178065	0.858672	1	FALSE
AC240274.1	101.06	-0.00243924	0.305301	-0.00798963	0.993625	1	FALSE
AC241585.1	1.45901	-0.0157927	0.13648	-0.115714	0.907879	1	FALSE
AC245100.1	19.046	-0.129038	0.30218	-0.427024	0.669362	1	FALSE
ACA64	1.09717	0.0716309	0.0912079	0.785358	0.432244	1	FALSE
ACAA1	800.602	0.485693	0.259377	1.87254	0.0611319	1	FALSE
ACAA2	2363.37	0.0943031	0.226598	0.41617	0.677285	1	FALSE
ACACA	3985.52	-0.116084	0.276888	-0.419245	0.675037	1	FALSE
ACACB	92.2832	0.0728567	0.29299	0.248666	0.803619	1	FALSE
ACAD10	455.798	-0.106212	0.279846	-0.379538	0.704288	1	FALSE
ACAD11	39.9141	0.0976079	0.306957	0.317986	0.750496	1	FALSE
ACAD8	729.8	-0.0421768	0.272703	-0.154662	0.877088	1	FALSE
ACAD9	967.877	0.144268	0.231164	0.624094	0.532566	1	FALSE
ACADL	18.1434	0.28984	0.301937	0.959936	0.337088	1	FALSE
ACADM	2571.51	-0.246895	0.247838	-0.996195	0.319156	1	FALSE
ACADS	539.892	-0.0140079	0.278752	-0.0502521	0.959921	1	FALSE
ACADSB	1138.95	-0.501025	0.275436	-1.81902	0.0689077	1	FALSE
ACADVL	3855.77	-0.105472	0.281644	-0.374487	0.708042	1	FALSE
ACAN	19.2016	0.220959	0.303668	0.727636	0.466837	1	FALSE
ACAP1	69.3019	-0.0136618	0.307908	-0.0443699	0.96461	1	FALSE
ACAP2	1881.91	-0.323517	0.266515	-1.21388	0.224794	1	FALSE
ACAP2-IT1	2.588	0.13192	0.189118	0.697556	0.485455	1	FALSE
ACAP3	855.997	0.244947	0.298435	0.820774	0.411775	1	FALSE
ACAT1	732.483	0.395692	0.258205	1.53247	0.125406	1	FALSE
ACAT2	4322.57	-0.123725	0.260766	-0.474467	0.635167	1	FALSE
ACBD3	1463.5	-0.146879	0.231374	-0.634815	0.525549	1	FALSE
ACBD4	116.515	0.648254	0.276647	2.34325	0.0191165	1	FALSE
ACBD5	896.12	-0.289068	0.277911	-1.04015	0.298271	1	FALSE
ACBD6	1244.3	0.219586	0.230714	0.951765	0.341216	1	FALSE
ACBD7	24.6058	-0.44488	0.307594	-1.44632	0.148087	1	FALSE
ACCS	234.157	-0.025276	0.29119	-0.0868022	0.930829	1	FALSE
ACD	786.445	0.36033	0.296142	1.21675	0.2237	1	FALSE
ACE	94.6304	0.197305	0.301439	0.654544	0.512762	1	FALSE
ACE2	21.4117	-0.0946273	0.301484	-0.313872	0.753619	1	FALSE
ACER1	0.401264	0.000949635	0.0784255	0.0121088	0.990339	1	FALSE
ACER2	11.2942	-0.220131	0.279494	-0.787606	0.430927	1	FALSE
ACER3	719.721	-0.0706443	0.257857	-0.273967	0.78411	1	FALSE
ACHE	731.624	0.627178	0.307782	2.03773	0.0415767	1	FALSE
ACIN1	10608.8	-0.0321515	0.254903	-0.126132	0.899628	1	FALSE
ACKR1	4.69902	0.0420618	0.234751	0.179176	0.857799	1	FALSE
ACKR2	10.8197	0.0655321	0.266168	0.246206	0.805523	1	FALSE
ACKR3	7210.78	-0.00140786	0.23645	-0.00595417	0.995249	1	FALSE
ACLY	13808.1	-0.193059	0.260576	-0.740891	0.45876	1	FALSE
ACMSD	0.200215	0	0.0747468	0	1	1	FALSE
ACO1	2097.03	0.24286	0.258681	0.93884	0.347813	1	FALSE
ACO2	2795.82	0.328111	0.262919	1.24796	0.212047	1	FALSE
ACOT1	22.7576	0.0383069	0.305544	0.125373	0.900229	1	FALSE
ACOT11	179.293	0.497318	0.294775	1.68711	0.0915819	1	FALSE
ACOT12	8.32567	-0.208868	0.265847	-0.785671	0.43206	1	FALSE
ACOT13	769.229	0.0101751	0.262536	0.0387571	0.969084	1	FALSE
ACOT2	78.807	0.454542	0.306281	1.48407	0.137791	1	FALSE
ACOT4	32.0629	0.00138772	0.307777	0.00450886	0.996402	1	FALSE
ACOT6	0.344869	-0.0630366	0.0748108	-0.842613	0.399445	1	FALSE
ACOT7	1420.06	0.546878	0.301583	1.81336	0.069777	1	FALSE
ACOT8	826.228	0.37947	0.265035	1.43177	0.152209	1	FALSE
ACOT9	759.592	0.215397	0.250139	0.861108	0.389178	1	FALSE
ACOX1	2285.23	0.0765378	0.231403	0.330756	0.740829	1	FALSE
ACOX2	98.5006	0.590729	0.290102	2.03628	0.0417221	1	FALSE
ACOX3	5951.55	0.0313714	0.243417	0.128879	0.897454	1	FALSE
ACOXL	613.99	0.177184	0.239887	0.738617	0.460139	1	FALSE
ACP1	2596.5	-0.0611078	0.227073	-0.269111	0.787845	1	FALSE
ACP2	1254.95	0.332309	0.269323	1.23387	0.217253	1	FALSE
ACP5	152.565	0.0983801	0.304319	0.323279	0.746484	1	FALSE
ACP6	263.92	0.193707	0.287959	0.672692	0.501143	1	FALSE
ACPP	327.37	0.253983	0.272418	0.932328	0.351167	1	FALSE
ACR	1.48951	0.0392185	0.129307	0.303297	0.761663	1	FALSE
ACRBP	21.4583	-0.0642494	0.30202	-0.212732	0.831536	1	FALSE
ACRC	107.916	0.235441	0.287118	0.820014	0.412208	1	FALSE
ACSBG1	2.59888	-0.074898	0.194944	-0.384202	0.700829	1	FALSE
ACSF2	1003.01	0.12801	0.263685	0.485465	0.627346	1	FALSE
ACSF3	552.724	0.154716	0.242411	0.638238	0.523319	1	FALSE
ACSL1	349.853	0.0067164	0.306182	0.021936	0.982499	1	FALSE
ACSL3	1629.66	-0.374837	0.247844	-1.51239	0.130435	1	FALSE
ACSL4	1096.47	-0.34088	0.271238	-1.25676	0.208841	1	FALSE
ACSL6	1.18519	-0.0206563	0.124493	-0.165924	0.868217	1	FALSE
ACSM1	0.25538	0.043713	0.0747468	0.584815	0.558672	1	FALSE
ACSM3	7.4267	0.0737421	0.261803	0.281671	0.778196	1	FALSE
ACSM4	136.784	-0.0835417	0.290006	-0.288069	0.773294	1	FALSE
ACSM6	0.91505	-0.0108031	0.122181	-0.0884186	0.929544	1	FALSE
ACSS1	1.63163	0.0868555	0.147373	0.589358	0.555621	1	FALSE
ACSS2	914.783	0.0683695	0.253315	0.269899	0.787238	1	FALSE
ACSS3	2081.34	-0.246695	0.238004	-1.03652	0.299961	1	FALSE
ACTA1	104.394	0.676138	0.307713	2.1973	0.0279988	1	FALSE
ACTA2	7.71015	0.319628	0.243087	1.31487	0.188553	1	FALSE
ACTA2-AS1	0.355106	-0.0208048	0.0747832	-0.278202	0.780858	1	FALSE
ACTB	104486	0.411404	0.302856	1.35841	0.174333	1	FALSE
ACTBP1	1.76756	-0.0364581	0.155661	-0.234216	0.814818	1	FALSE
ACTBP11	9.14376	0.0774878	0.273132	0.283701	0.77664	1	FALSE
ACTBP12	0.355106	-0.0208048	0.0747832	-0.278202	0.780858	1	FALSE
ACTBP14	0.5475	-0.00479506	0.0775594	-0.0618243	0.950703	1	FALSE
ACTBP2	19.4588	0.140897	0.300786	0.468432	0.639476	1	FALSE
ACTBP7	2.91008	0.0835285	0.199951	0.417744	0.676134	1	FALSE
ACTBP8	3.50786	0.0894884	0.218666	0.409247	0.682358	1	FALSE
ACTBP9	7.78363	-0.241029	0.255921	-0.941812	0.346289	1	FALSE
ACTC1	541.259	0.672192	0.303537	2.21453	0.0267921	1	FALSE
ACTG1	181603	0.230752	0.28845	0.799972	0.423727	1	FALSE
ACTG1P1	18.0526	-0.243327	0.301478	-0.807115	0.4196	1	FALSE
ACTG1P10	1.32385	0.087438	0.140595	0.621914	0.533998	1	FALSE
ACTG1P12	2.44944	0.09893	0.183597	0.538843	0.589995	1	FALSE
ACTG1P14	17.6866	0.412539	0.281284	1.46663	0.142477	1	FALSE
ACTG1P15	1.21744	0.0652454	0.137201	0.475545	0.634399	1	FALSE
ACTG1P16	1.70019	0.0934141	0.150762	0.619613	0.535512	1	FALSE
ACTG1P17	9.40057	0.137208	0.270436	0.507357	0.611904	1	FALSE
ACTG1P18	0.262677	-0.0210196	0.0747468	-0.281211	0.778549	1	FALSE
ACTG1P19	1.03829	0.0229916	0.116126	0.197989	0.843054	1	FALSE
ACTG1P20	12.5641	-0.252036	0.287811	-0.875701	0.381192	1	FALSE
ACTG1P21	1.12409	0.0406577	0.133396	0.304788	0.760527	1	FALSE
ACTG1P23	2.37806	0.041212	0.161052	0.255893	0.798034	1	FALSE
ACTG1P24	5.38397	0.0140483	0.243221	0.0577593	0.95394	1	FALSE
ACTG1P3	2.57041	0.137248	0.180993	0.758307	0.448267	1	FALSE
ACTG1P9	3.33123	-0.0300304	0.19861	-0.151203	0.879816	1	FALSE
ACTG2	17.0713	0.335198	0.279416	1.19964	0.230281	1	FALSE
ACTL10	23.4636	0.200028	0.300957	0.664639	0.506281	1	FALSE
ACTL6A	1872.73	-0.000882339	0.233629	-0.00377667	0.996987	1	FALSE
ACTL6B	0.908778	-0.0095578	0.112786	-0.0847426	0.932466	1	FALSE
ACTL7B	0.256049	0.0221355	0.0747468	0.29614	0.767123	1	FALSE
ACTL8	0.96749	-0.0728066	0.11685	-0.623078	0.533233	1	FALSE
ACTN1	11511.7	0.391788	0.266585	1.46966	0.141655	1	FALSE
ACTN1-AS1	3.32209	-0.0246032	0.195221	-0.126027	0.89971	1	FALSE
ACTN2	19.3475	0.0154773	0.296022	0.0522842	0.958302	1	FALSE
ACTN3	589.583	0.366577	0.288287	1.27157	0.203527	1	FALSE
ACTN4	7646.28	0.462627	0.268026	1.72605	0.0843379	1	FALSE
ACTN4P1	0.809506	-0.00881627	0.110153	-0.0800369	0.936208	1	FALSE
ACTP1	0.253314	0	0.0747468	0	1	1	FALSE
ACTR10	1396.06	-0.0124576	0.255771	-0.048706	0.961154	1	FALSE
ACTR1A	3931.7	0.144615	0.244223	0.592144	0.553754	1	FALSE
ACTR1B	2243.04	-0.151748	0.219699	-0.690707	0.48975	1	FALSE
ACTR2	8416.9	-0.32792	0.27103	-1.2099	0.226317	1	FALSE
ACTR3	5993.19	0.1	0.221593	0.45128	0.651788	1	FALSE
ACTR3B	346.448	0.118801	0.278335	0.426828	0.669505	1	FALSE
ACTR3C	4.20285	-0.0721998	0.23227	-0.310845	0.755919	1	FALSE
ACTR3P2	0.924723	0.0126962	0.122478	0.103661	0.917438	1	FALSE
ACTR5	384.837	0.0999845	0.250879	0.398537	0.690234	1	FALSE
ACTR6	709.472	-0.258738	0.274502	-0.942572	0.3459	1	FALSE
ACTR8	676.431	-0.0430482	0.249283	-0.172688	0.862897	1	FALSE
ACTRT1	1.08143	0.0304921	0.100381	0.303763	0.761308	1	FALSE
ACTRT3	96.3194	0.253703	0.301173	0.842383	0.399574	1	FALSE
ACVR1	812.06	0.239405	0.244878	0.97765	0.328247	1	FALSE
ACVR1B	2411.77	-0.154215	0.22815	-0.675939	0.49908	1	FALSE
ACVR1C	20.4894	-0.133458	0.303235	-0.440113	0.659855	1	FALSE
ACVR2A	686.656	-0.204651	0.259477	-0.788704	0.430285	1	FALSE
ACVR2B	6206.79	-0.116691	0.24706	-0.472317	0.6367	1	FALSE
ACVR2B-AS1	162.901	-0.185063	0.266004	-0.695716	0.486607	1	FALSE
ACVRL1	1.68925	0.193939	0.139091	1.39433	0.163217	1	FALSE
ACY1	22.3763	0.235559	0.293925	0.801424	0.422886	1	FALSE
ACY3	0.642134	-0.0229484	0.100682	-0.227929	0.819702	1	FALSE
ACYP1	88.6437	0.317405	0.280701	1.13076	0.258157	1	FALSE
ACYP2	117.718	-0.0821722	0.288088	-0.285233	0.775466	1	FALSE
AD000684.2	8.82722	0.0235473	0.2752	0.0855641	0.931813	1	FALSE
AD000864.6	8.08151	-0.4209	0.267339	-1.5744	0.115394	1	FALSE
AD001527.4	6.95521	-0.0266775	0.244977	-0.108898	0.913283	1	FALSE
ADA	391.885	0.643827	0.298859	2.15428	0.0312181	1	FALSE
ADAD2	2.53872	-0.0969541	0.170939	-0.567184	0.570589	1	FALSE
ADAL	246.3	0.0359962	0.264216	0.136238	0.891633	1	FALSE
ADAM10	4903.86	-0.387818	0.259699	-1.49334	0.135349	1	FALSE
ADAM11	85.6398	-0.0788674	0.307578	-0.256414	0.797631	1	FALSE
ADAM12	21.7725	-0.361194	0.296854	-1.21674	0.223703	1	FALSE
ADAM15	223.536	0.650755	0.305286	2.13162	0.033038	1	FALSE
ADAM17	2036.1	-0.233552	0.258426	-0.903746	0.36613	1	FALSE
ADAM18	1.46304	0.00169711	0.150721	0.01126	0.991016	1	FALSE
ADAM19	12623.9	0.0473349	0.259105	0.182686	0.855044	1	FALSE
ADAM2	5.79643	-0.311491	0.20956	-1.4864	0.137173	1	FALSE
ADAM20	2.04341	0.105177	0.171344	0.613838	0.539322	1	FALSE
ADAM20P1	7.89177	0.119473	0.261451	0.456961	0.647699	1	FALSE
ADAM21	6.76274	0.431709	0.250874	1.72082	0.0852838	1	FALSE
ADAM21P1	1.0672	-0.0120022	0.128587	-0.093339	0.925634	1	FALSE
ADAM22	154.292	-0.0763972	0.28675	-0.266424	0.789912	1	FALSE
ADAM23	593.135	-0.36333	0.247512	-1.46793	0.142123	1	FALSE
ADAM28	65.2574	0.0391972	0.303459	0.129168	0.897225	1	FALSE
ADAM29	15.5194	-0.135388	0.292723	-0.462511	0.643715	1	FALSE
ADAM32	2.81953	0.0425899	0.200057	0.212888	0.831414	1	FALSE
ADAM33	49.0937	0.414808	0.307216	1.35022	0.176947	1	FALSE
ADAM8	34.6143	0.180924	0.3072	0.588945	0.555898	1	FALSE
ADAM9	804.661	-0.108504	0.289976	-0.374181	0.70827	1	FALSE
ADAMTS1	747.831	-0.301329	0.274665	-1.09708	0.272608	1	FALSE
ADAMTS10	298.534	0.0578009	0.28821	0.200551	0.84105	1	FALSE
ADAMTS12	1622.53	-0.351419	0.306178	-1.14776	0.251067	1	FALSE
ADAMTS13	561.792	-0.383054	0.293989	-1.30295	0.192591	1	FALSE
ADAMTS14	8.4022	0.0187985	0.27288	0.068889	0.945078	1	FALSE
ADAMTS15	54.2937	0.229155	0.304867	0.751656	0.452258	1	FALSE
ADAMTS16	174.332	-0.800529	0.289648	-2.7638	0.00571329	1	FALSE
ADAMTS17	22.4829	-0.296848	0.277729	-1.06884	0.285142	1	FALSE
ADAMTS18	1877.14	-0.0734962	0.303316	-0.242309	0.808541	1	FALSE
ADAMTS19	645.953	-0.308064	0.277044	-1.11197	0.266152	1	FALSE
ADAMTS19-AS1	22.5087	-0.00176467	0.307002	-0.00574808	0.995414	1	FALSE
ADAMTS2	322.901	-0.10245	0.27794	-0.368605	0.712422	1	FALSE
ADAMTS20	120.114	-0.330912	0.238526	-1.38732	0.165344	1	FALSE
ADAMTS3	107.002	-0.335358	0.287739	-1.16549	0.24382	1	FALSE
ADAMTS4	116.635	0.149607	0.283384	0.527928	0.597549	1	FALSE
ADAMTS5	284.583	-0.0704359	0.299274	-0.235356	0.813932	1	FALSE
ADAMTS6	53.7804	-0.275846	0.306357	-0.900406	0.367904	1	FALSE
ADAMTS7	1137.93	0.407851	0.280106	1.45606	0.145376	1	FALSE
ADAMTS7P1	11.8958	-0.138509	0.277434	-0.499249	0.617604	1	FALSE
ADAMTS7P3	20.0399	-0.18144	0.302262	-0.600275	0.548323	1	FALSE
ADAMTS7P4	0.401267	0.000285717	0.074792	0.00382015	0.996952	1	FALSE
ADAMTS8	971.094	-0.214986	0.251711	-0.854099	0.39305	1	FALSE
ADAMTS9	358.301	0.31705	0.298975	1.06046	0.288936	1	FALSE
ADAMTS9-AS2	9.22281	-0.252468	0.262625	-0.961323	0.33639	1	FALSE
ADAMTSL1	39.7698	0.706271	0.305887	2.30893	0.0209477	1	FALSE
ADAMTSL2	5.92328	-0.0661955	0.232963	-0.284147	0.776298	1	FALSE
ADAMTSL3	44.7724	-0.270364	0.30286	-0.892704	0.372016	1	FALSE
ADAMTSL4	108.055	-0.129117	0.289947	-0.44531	0.656095	1	FALSE
ADAMTSL4-AS1	5.15332	0.16641	0.218229	0.762545	0.445735	1	FALSE
ADAMTSL5	49.2134	0.813251	0.306875	2.6501	0.00804668	1	FALSE
ADAP1	40.2998	0.423999	0.30086	1.40929	0.15875	1	FALSE
ADAP2	19.1213	0.128571	0.29906	0.429917	0.667256	1	FALSE
ADAR	9544.04	0.0735275	0.250093	0.294001	0.768757	1	FALSE
ADARB1	354.48	-0.12562	0.255585	-0.491501	0.623072	1	FALSE
ADARB2	28.7056	-0.150242	0.307835	-0.488059	0.625508	1	FALSE
ADAT1	427.49	0.298339	0.24238	1.23087	0.21837	1	FALSE
ADAT2	187.199	-0.256912	0.294186	-0.873298	0.382501	1	FALSE
ADAT3	152.312	0.699464	0.297771	2.349	0.018824	1	FALSE
ADCK1	108.455	0.378941	0.307799	1.23113	0.218274	1	FALSE
ADCK2	560.343	0.239749	0.260381	0.920765	0.357173	1	FALSE
ADCK5	282.904	0.429202	0.281725	1.52348	0.127639	1	FALSE
ADCY1	531.155	0.0388803	0.279513	0.1391	0.889371	1	FALSE
ADCY10	85.6373	-0.263022	0.307907	-0.854226	0.39298	1	FALSE
ADCY10P1	97.915	-0.192998	0.288539	-0.668881	0.503571	1	FALSE
ADCY2	1774.7	-0.0238838	0.2658	-0.0898562	0.928401	1	FALSE
ADCY3	516.825	0.101132	0.262313	0.385539	0.699838	1	FALSE
ADCY4	1.91772	-0.0810492	0.172886	-0.468802	0.639211	1	FALSE
ADCY5	369.853	0.248627	0.264212	0.941017	0.346696	1	FALSE
ADCY6	1604.68	-0.0493103	0.292851	-0.16838	0.866284	1	FALSE
ADCY7	519.032	0.390712	0.296904	1.31595	0.18819	1	FALSE
ADCY8	502.824	-0.554568	0.286475	-1.93583	0.052888	1	FALSE
ADCY9	176.15	0.285293	0.293761	0.971173	0.331462	1	FALSE
ADCYAP1	0.405828	-0.0637295	0.0748231	-0.851736	0.394361	1	FALSE
ADCYAP1R1	79.9145	0.0449277	0.298797	0.150362	0.880479	1	FALSE
ADD1	9835.52	0.16748	0.233868	0.71613	0.473911	1	FALSE
ADD2	749.332	0.0994438	0.274939	0.361694	0.717581	1	FALSE
ADD3	3925.94	-0.255651	0.280541	-0.911278	0.362149	1	FALSE
ADD3-AS1	10.4349	0.0578168	0.284403	0.203292	0.838907	1	FALSE
ADGB	1.23013	-0.131302	0.137079	-0.957851	0.338138	1	FALSE
ADGRA1	199.225	0.14904	0.304432	0.489569	0.624439	1	FALSE
ADGRA1-AS1	52.2267	-0.666252	0.301056	-2.21305	0.0268941	1	FALSE
ADGRA2	11.675	0.0173078	0.265394	0.0652156	0.948002	1	FALSE
ADGRA3	2526.96	0.117506	0.238429	0.492834	0.62213	1	FALSE
ADGRB1	284.217	0.829936	0.305478	2.71684	0.00659079	1	FALSE
ADGRB2	630.591	-0.0564117	0.238548	-0.236479	0.813061	1	FALSE
ADGRB3	12.861	0.0782502	0.294413	0.265784	0.790406	1	FALSE
ADGRD1	16.3027	0.286348	0.299214	0.957	0.338567	1	FALSE
ADGRD2	1.41141	-0.159072	0.13652	-1.1652	0.243939	1	FALSE
ADGRE2	1.53005	-0.0745414	0.1355	-0.550122	0.582236	1	FALSE
ADGRE5	54.9322	0.329076	0.307904	1.06876	0.285178	1	FALSE
ADGRF2	207.785	-0.125805	0.295685	-0.425469	0.670495	1	FALSE
ADGRF3	4.90484	-0.297937	0.232554	-1.28115	0.20014	1	FALSE
ADGRF4	124.861	-0.440678	0.297603	-1.48076	0.138671	1	FALSE
ADGRF5	0.539613	-0.0730463	0.0787443	-0.92764	0.353594	1	FALSE
ADGRF5P1	5.25537	0.029882	0.230086	0.129873	0.896667	1	FALSE
ADGRG1	15.6843	0.364741	0.2936	1.24231	0.214124	1	FALSE
ADGRG2	1206.43	-0.431061	0.252834	-1.70492	0.0882101	1	FALSE
ADGRG3	2.86589	0.0180854	0.190307	0.0950325	0.924289	1	FALSE
ADGRG5	62.7604	0.366928	0.307667	1.19262	0.23302	1	FALSE
ADGRG6	95.4016	-0.16222	0.307565	-0.527433	0.597893	1	FALSE
ADGRG7	37.5313	-0.205526	0.300491	-0.683966	0.493996	1	FALSE
ADGRL1	2722.05	0.260426	0.283391	0.918965	0.358114	1	FALSE
ADGRL2	2668.98	-0.154549	0.245858	-0.62861	0.529605	1	FALSE
ADGRL3	235.721	0.211354	0.256427	0.824226	0.409811	1	FALSE
ADGRL4	0.557554	0.0658966	0.0790437	0.833672	0.404466	1	FALSE
ADGRV1	1146.21	-0.136637	0.307071	-0.444969	0.656342	1	FALSE
ADH5	6913.98	-0.125517	0.236877	-0.529882	0.596194	1	FALSE
ADH5P2	0.848416	-0.122055	0.104864	-1.16395	0.244446	1	FALSE
ADH5P3	2.17499	0.0771408	0.177764	0.43395	0.664325	1	FALSE
ADH5P4	33.8504	-0.0630293	0.307903	-0.204705	0.837802	1	FALSE
ADH6	1.01905	-0.0826514	0.134508	-0.614473	0.538903	1	FALSE
ADHFE1	91.6631	0.0818601	0.300151	0.27273	0.785061	1	FALSE
ADI1	1805.93	0.13955	0.259607	0.537543	0.590892	1	FALSE
ADIPOQ	0.460503	0	0.0753534	0	1	1	FALSE
ADIPOR1	3206.25	0.151105	0.233162	0.648069	0.516941	1	FALSE
ADIPOR1P2	0.814031	-0.0880122	0.101251	-0.86925	0.38471	1	FALSE
ADIPOR2	3186.07	-0.36604	0.265079	-1.38087	0.167319	1	FALSE
ADIRF	1.18091	-0.0696485	0.103732	-0.671427	0.501948	1	FALSE
ADIRF-AS1	123.856	-0.0775872	0.303898	-0.255307	0.798486	1	FALSE
ADK	553.275	0.104721	0.244365	0.428541	0.668257	1	FALSE
ADM	517.797	0.245125	0.306952	0.798578	0.424535	1	FALSE
ADM2	626.847	0.38391	0.277922	1.38136	0.167168	1	FALSE
ADM5	36.3157	0.166046	0.303793	0.546576	0.58467	1	FALSE
ADNP	6397.3	-0.0292438	0.227963	-0.128283	0.897925	1	FALSE
ADNP-AS1	20.9024	-0.107046	0.30538	-0.350536	0.725937	1	FALSE
ADNP2	2392.89	-0.182425	0.232262	-0.785428	0.432202	1	FALSE
ADO	1132.61	-0.106541	0.244414	-0.435906	0.662905	1	FALSE
ADORA1	200.776	0.555619	0.306848	1.81073	0.0701826	1	FALSE
ADORA2A	3.31509	0.0481665	0.195113	0.246864	0.805013	1	FALSE
ADORA2A-AS1	1.90091	0.212503	0.129951	1.63525	0.101997	1	FALSE
ADORA2B	32.0076	-0.277762	0.29954	-0.927295	0.353773	1	FALSE
ADPGK	3188.45	-0.258118	0.264937	-0.97426	0.329927	1	FALSE
ADPGK-AS1	10.8914	-0.431244	0.273555	-1.57644	0.114924	1	FALSE
ADPRH	415.343	-0.307818	0.284994	-1.08008	0.280104	1	FALSE
ADPRHL1	30.137	0.097111	0.306767	0.316563	0.751575	1	FALSE
ADPRHL2	895.114	-0.0249442	0.266761	-0.0935075	0.9255	1	FALSE
ADPRM	137.546	-0.00466129	0.280074	-0.0166431	0.986721	1	FALSE
ADRA1A	4.74548	-0.0867845	0.203571	-0.42631	0.669882	1	FALSE
ADRA1B	1.64944	0.0126776	0.156405	0.0810564	0.935397	1	FALSE
ADRA1D	2.02607	0.0689973	0.15705	0.439334	0.66042	1	FALSE
ADRA2A	103.369	0.340857	0.306364	1.11259	0.265885	1	FALSE
ADRA2B	61.0193	0.413896	0.301022	1.37497	0.169141	1	FALSE
ADRA2C	1008.77	0.380582	0.285726	1.33198	0.182867	1	FALSE
ADRB1	1.16394	0.0718992	0.132418	0.54297	0.58715	1	FALSE
ADRB2	11.8253	-0.110547	0.286281	-0.38615	0.699385	1	FALSE
ADRB3	1.71001	-0.0610078	0.159312	-0.382944	0.701761	1	FALSE
ADRM1	3368.04	0.309698	0.288225	1.0745	0.282597	1	FALSE
ADSL	3619.7	0.282025	0.250469	1.12598	0.260172	1	FALSE
ADSS	1109.05	-0.155581	0.275162	-0.565414	0.571792	1	FALSE
ADSSL1	177.615	0.188363	0.28751	0.655152	0.51237	1	FALSE
ADTRP	1.7977	-0.0298816	0.148251	-0.201561	0.84026	1	FALSE
AE000658.25	9.52485	-0.309621	0.262661	-1.17879	0.238483	1	FALSE
AE000661.37	17.3477	0.166954	0.297375	0.561427	0.574506	1	FALSE
AEBP1	2122.36	0.300642	0.284837	1.05549	0.291201	1	FALSE
AEBP2	674.338	-0.248271	0.243847	-1.01814	0.308611	1	FALSE
AEN	2513.88	0.089909	0.274709	0.327289	0.74345	1	FALSE
AES	15772.3	0.101404	0.286569	0.353854	0.723448	1	FALSE
AF001548.5	5.24713	0.0830911	0.215395	0.385761	0.699673	1	FALSE
AF001548.6	0.200215	0	0.0747468	0	1	1	FALSE
AF003625.3	1.77469	-0.233591	0.158026	-1.47818	0.139359	1	FALSE
AF011889.2	3.40243	-0.251063	0.201437	-1.24636	0.212631	1	FALSE
AF011889.5	9.55659	-0.0808422	0.222115	-0.363965	0.715884	1	FALSE
AF013593.1	0.542695	-0.0405735	0.0868975	-0.466912	0.640563	1	FALSE
AF038458.3	1.36328	0.0396306	0.106088	0.373564	0.708728	1	FALSE
AF064858.10	8.70753	0.0306289	0.261565	0.117099	0.906782	1	FALSE
AF064858.11	2.10718	-0.00865863	0.161439	-0.0536341	0.957227	1	FALSE
AF064858.6	2.19273	-0.099696	0.156407	-0.637415	0.523854	1	FALSE
AF064858.7	0.301157	0.000772735	0.0747832	0.010333	0.991756	1	FALSE
AF064858.8	2.55154	-0.0365731	0.185915	-0.19672	0.844047	1	FALSE
AF064860.5	0.369759	-0.0212918	0.074792	-0.284681	0.775889	1	FALSE
AF064860.7	4.48039	0.178932	0.224085	0.798499	0.424581	1	FALSE
AF067845.1	2.39254	-0.094937	0.150463	-0.630966	0.528062	1	FALSE
AF067845.2	1.24946	-0.087243	0.108188	-0.8064	0.420012	1	FALSE
AF067845.3	0.939157	-0.0738381	0.106205	-0.695238	0.486906	1	FALSE
AF121897.4	0.445322	-0.0138503	0.0753148	-0.183898	0.854093	1	FALSE
AF127577.12	0.254999	-0.0210196	0.0747468	-0.281211	0.778549	1	FALSE
AF127936.7	2.36963	0.0619241	0.164591	0.37623	0.706746	1	FALSE
AF127936.9	22.3505	0.363377	0.306842	1.18425	0.236315	1	FALSE
AF129075.5	2.368	0.0483839	0.15927	0.303785	0.761292	1	FALSE
AF129408.17	0.652859	0.0399754	0.0914381	0.437185	0.661977	1	FALSE
AF131215.2	263.997	-0.386234	0.301983	-1.27899	0.2009	1	FALSE
AF131215.3	3.64391	0.00249673	0.178678	0.0139734	0.988851	1	FALSE
AF131215.4	1.77851	0.0683751	0.138311	0.494357	0.621054	1	FALSE
AF131215.6	0.250578	0.000557948	0.0747468	0.00746451	0.994044	1	FALSE
AF131215.8	31.8969	-0.491796	0.307645	-1.59858	0.109913	1	FALSE
AF131215.9	152.515	-0.185961	0.265324	-0.700884	0.483376	1	FALSE
AF131216.1	27.9373	-0.22527	0.305276	-0.737922	0.460562	1	FALSE
AF131216.5	4.11767	0.000661185	0.215882	0.00306272	0.997556	1	FALSE
AF131216.6	0.350017	0.0223503	0.0747832	0.298868	0.765041	1	FALSE
AF131217.1	5.65679	-0.339618	0.223321	-1.52076	0.128319	1	FALSE
AF146191.4	10.1054	0.0913116	0.281457	0.324424	0.745617	1	FALSE
AF165138.7	2.42698	0.09758	0.178959	0.545264	0.585572	1	FALSE
AF186192.5	0.254999	-0.0210196	0.0747468	-0.281211	0.778549	1	FALSE
AF196970.3	0.873832	-0.0270429	0.121062	-0.22338	0.82324	1	FALSE
AF196972.4	0.44911	-0.00229191	0.0753432	-0.0304196	0.975732	1	FALSE
AF196972.9	1.53222	0.138393	0.150281	0.920896	0.357105	1	FALSE
AF230666.2	0.262677	-0.0210196	0.0747468	-0.281211	0.778549	1	FALSE
AFAP1	1323.23	-0.0481538	0.263775	-0.182556	0.855146	1	FALSE
AFAP1-AS1	0.298985	0.0435922	0.074767	0.583041	0.559866	1	FALSE
AFAP1L1	42.9395	-0.321135	0.307325	-1.04493	0.296053	1	FALSE
AFAP1L2	24.6315	0.165762	0.307351	0.539325	0.589663	1	FALSE
AFDN	7595.83	0.0111913	0.273312	0.0409469	0.967338	1	FALSE
AFDN-AS1	65.3915	-0.033961	0.300164	-0.113141	0.909918	1	FALSE
AFF1	4820.15	-0.234145	0.295277	-0.792968	0.427796	1	FALSE
AFF2	41.5028	-0.108536	0.303652	-0.357433	0.720767	1	FALSE
AFF3	27.9698	0.265713	0.29891	0.888941	0.374035	1	FALSE
AFF4	6901.86	-0.213578	0.28303	-0.754613	0.450481	1	FALSE
AFG3L1P	593.875	0.318226	0.285477	1.11471	0.264973	1	FALSE
AFG3L2	2485.11	-0.0728218	0.231512	-0.314549	0.753104	1	FALSE
AFG3L2P1	0.801863	0.0149082	0.108773	0.137058	0.890985	1	FALSE
AFM	0.293514	0.0223503	0.0747832	0.298868	0.765041	1	FALSE
AFMID	498.835	-0.0311667	0.264972	-0.117623	0.906367	1	FALSE
AFP	93.7624	-0.105653	0.298662	-0.353753	0.723524	1	FALSE
AFTPH	583.306	-0.0896066	0.26002	-0.344614	0.730384	1	FALSE
AGA	504.163	-0.165219	0.248659	-0.664441	0.506408	1	FALSE
AGAP1	1007.92	-0.20332	0.254465	-0.799009	0.424285	1	FALSE
AGAP1-IT1	2.30075	-0.0328652	0.181706	-0.18087	0.85647	1	FALSE
AGAP10P	1.27952	-0.0616629	0.140308	-0.439483	0.660311	1	FALSE
AGAP12P	0.6421	-0.0328221	0.0820839	-0.39986	0.68926	1	FALSE
AGAP13P	8.04743	-0.0319536	0.263144	-0.12143	0.90335	1	FALSE
AGAP2	4.93377	0.0289864	0.204708	0.141599	0.887397	1	FALSE
AGAP2-AS1	2.33281	0.100892	0.147141	0.685683	0.492913	1	FALSE
AGAP3	1552.25	0.110073	0.289752	0.379887	0.704029	1	FALSE
AGAP4	46.8211	0.323102	0.307092	1.05213	0.292738	1	FALSE
AGAP5	2.63042	0.0727303	0.186868	0.389207	0.697123	1	FALSE
AGAP6	129.765	0.186972	0.284518	0.657152	0.511083	1	FALSE
AGAP7P	62.1146	0.0825483	0.297091	0.277855	0.781124	1	FALSE
AGAP9	67.9037	0.412643	0.30746	1.3421	0.179563	1	FALSE
AGBL1	6.14547	0.155852	0.234977	0.663265	0.507161	1	FALSE
AGBL2	56.0275	-0.00994065	0.307538	-0.0323233	0.974214	1	FALSE
AGBL3	51.0986	-0.250993	0.301587	-0.832241	0.405273	1	FALSE
AGBL4	54.5338	-0.134555	0.307834	-0.437103	0.662037	1	FALSE
AGBL5	2474.48	-0.0933567	0.250841	-0.372174	0.709763	1	FALSE
AGBL5-AS1	0.614238	0.0179043	0.0808072	0.221568	0.82465	1	FALSE
AGBL5-IT1	0.456753	-0.0243723	0.0819609	-0.297364	0.766188	1	FALSE
AGER	349.843	-0.134705	0.293078	-0.459621	0.645788	1	FALSE
AGFG1	2132.77	-0.130475	0.241005	-0.541377	0.588248	1	FALSE
AGFG2	1630.09	-0.0741018	0.253527	-0.292283	0.77007	1	FALSE
AGGF1	1196.57	-0.110345	0.254072	-0.434308	0.664065	1	FALSE
AGGF1P3	2.4704	-0.0529852	0.179626	-0.294976	0.768012	1	FALSE
AGK	656.116	-0.0317554	0.241874	-0.131289	0.895547	1	FALSE
AGKP1	0.423039	-0.0212918	0.074792	-0.284681	0.775889	1	FALSE
AGL	1109.35	-0.266578	0.27376	-0.973765	0.330173	1	FALSE
AGMAT	104.578	-0.238385	0.292821	-0.814097	0.41559	1	FALSE
AGMO	20.6759	-0.270815	0.305046	-0.887783	0.374657	1	FALSE
AGO1	2559.57	0.0184316	0.248196	0.0742622	0.940802	1	FALSE
AGO2	3581.15	-0.0489782	0.278814	-0.175666	0.860556	1	FALSE
AGO3	643.394	-0.004845	0.265187	-0.0182701	0.985423	1	FALSE
AGO4	1097.36	-0.134157	0.280263	-0.478681	0.632165	1	FALSE
AGPAT1	5435.32	0.309026	0.277987	1.11166	0.266285	1	FALSE
AGPAT2	960.628	0.407662	0.288018	1.41541	0.156949	1	FALSE
AGPAT3	2778.47	0.280564	0.260479	1.07711	0.281432	1	FALSE
AGPAT4	3352.26	-0.127325	0.255363	-0.498606	0.618057	1	FALSE
AGPAT4-IT1	107.936	0.223636	0.304014	0.735611	0.461967	1	FALSE
AGPAT5	1788.96	-0.282727	0.25148	-1.12425	0.260905	1	FALSE
AGPS	2995.41	-0.0123828	0.258386	-0.0479237	0.961777	1	FALSE
AGR2	0.906176	0.0232153	0.0926304	0.250623	0.802105	1	FALSE
AGR3	0.646697	-0.0857422	0.08449	-1.01482	0.310192	1	FALSE
AGRN	5735.91	0.0652131	0.263376	0.247605	0.80444	1	FALSE
AGT	1.41302	0.0334207	0.159367	0.209708	0.833895	1	FALSE
AGTPBP1	2005.81	-0.189351	0.275089	-0.688328	0.491246	1	FALSE
AGTR1	1.39198	-0.0370876	0.12912	-0.287234	0.773933	1	FALSE
AGTRAP	1406.15	0.391292	0.289171	1.35315	0.176008	1	FALSE
AGXT	1.07316	-0.0264396	0.130168	-0.20312	0.839041	1	FALSE
AGXT2	0.201718	-0.0210196	0.0747468	-0.281211	0.778549	1	FALSE
AHCTF1	980.862	-0.239616	0.264066	-0.907411	0.364189	1	FALSE
AHCY	10160.8	0.159913	0.264476	0.604638	0.545419	1	FALSE
AHCYL1	2975.48	0.192381	0.225468	0.853251	0.39352	1	FALSE
AHCYL2	931.377	-0.119858	0.23704	-0.505646	0.613105	1	FALSE
AHCYP2	0.313602	0.0220146	0.074767	0.294443	0.768419	1	FALSE
AHCYP4	1.17821	-0.0235589	0.13227	-0.178112	0.858635	1	FALSE
AHCYP5	0.263023	0.0221355	0.0747468	0.29614	0.767123	1	FALSE
AHCYP7	0.306594	0	0.0747468	0	1	1	FALSE
AHDC1	1112.59	0.264459	0.287554	0.919684	0.357738	1	FALSE
AHI1	380.873	-0.129996	0.28197	-0.461026	0.64478	1	FALSE
AHNAK	10492.2	0.263191	0.307692	0.855371	0.392346	1	FALSE
AHNAK2	48.8185	0.47186	0.306758	1.53822	0.123996	1	FALSE
AHR	33.2709	0.22912	0.307359	0.745448	0.456001	1	FALSE
AHRR	25.2212	0.411763	0.306082	1.34527	0.178538	1	FALSE
AHSA1	2921.41	0.260894	0.251733	1.03639	0.30002	1	FALSE
AHSA2	2112.09	-0.131421	0.307108	-0.427931	0.668701	1	FALSE
AHSG	0.453529	0	0.0753319	0	1	1	FALSE
AHSP	0.24634	0	0.0747468	0	1	1	FALSE
AICDA	0.949324	0.067427	0.10725	0.628689	0.529553	1	FALSE
AIDA	650.038	-0.166541	0.275924	-0.603576	0.546125	1	FALSE
AIF1	16.9091	-0.168638	0.293896	-0.573801	0.566102	1	FALSE
AIF1L	6104.72	-0.0222441	0.222482	-0.0999814	0.920359	1	FALSE
AIFM1	1667.67	-0.051969	0.232338	-0.223679	0.823007	1	FALSE
AIFM2	248.027	0.387891	0.27427	1.41427	0.157284	1	FALSE
AIFM3	18.2437	0.17745	0.302189	0.587216	0.557059	1	FALSE
AIG1	142.366	-0.0745849	0.282284	-0.264219	0.791611	1	FALSE
AIM1	16.2594	-0.0325679	0.290457	-0.112126	0.910723	1	FALSE
AIM1L	53.6772	0.193656	0.306183	0.632486	0.52707	1	FALSE
AIM2	58.002	-0.362097	0.306158	-1.18271	0.236923	1	FALSE
AIMP1	1054.09	-0.0696306	0.234993	-0.296309	0.766994	1	FALSE
AIMP1P1	0.199546	0.0221355	0.0747468	0.29614	0.767123	1	FALSE
AIMP2	1328.81	0.400616	0.286655	1.39755	0.162247	1	FALSE
AIP	884.56	0.4797	0.301633	1.59034	0.111758	1	FALSE
AIPL1	0.701025	-0.0396973	0.0956468	-0.415041	0.678112	1	FALSE
AIRE	216.22	-0.310319	0.30199	-1.02758	0.304148	1	FALSE
AJ003147.9	1.22697	0.0891396	0.137524	0.648176	0.516871	1	FALSE
AJ011931.1	0.198878	0.043713	0.0747468	0.584815	0.558672	1	FALSE
AJ011932.1	65.6506	0.00286448	0.306864	0.00933467	0.992552	1	FALSE
AJAP1	2008.4	-0.368663	0.264778	-1.39235	0.163817	1	FALSE
AJUBA	963.074	-0.12313	0.267023	-0.461121	0.644712	1	FALSE
AK1	52.276	0.211457	0.305678	0.691764	0.489085	1	FALSE
AK2	1078.96	-0.0820326	0.249453	-0.32885	0.742269	1	FALSE
AK3	1711.21	0.0458364	0.228211	0.200851	0.840815	1	FALSE
AK3P3	8.33016	0.0567111	0.26861	0.211128	0.832787	1	FALSE
AK4	5608.12	-0.665295	0.295938	-2.24809	0.0245707	1	FALSE
AK4P1	0.977651	-0.0655289	0.108648	-0.603133	0.54642	1	FALSE
AK4P3	0.253314	0	0.0747468	0	1	1	FALSE
AK4P6	0.250578	0.000557948	0.0747468	0.00746451	0.994044	1	FALSE
AK5	4.71526	0.158921	0.236647	0.671551	0.50187	1	FALSE
AK6	439.315	-0.102494	0.246522	-0.415758	0.677587	1	FALSE
AK6P1	0.194076	0.000557948	0.0747468	0.00746451	0.994044	1	FALSE
AK7	68.3913	-0.203383	0.291848	-0.69688	0.485878	1	FALSE
AK8	65.2953	-0.170423	0.303005	-0.562442	0.573815	1	FALSE
AK9	42.0803	-0.237458	0.307868	-0.771299	0.44053	1	FALSE
AKAIN1	0.194744	-0.0210196	0.0747468	-0.281211	0.778549	1	FALSE
AKAP1	951.894	-0.144379	0.232184	-0.621828	0.534055	1	FALSE
AKAP10	1035.18	-0.231836	0.269622	-0.859857	0.389868	1	FALSE
AKAP11	962.729	-0.127714	0.287843	-0.443692	0.657265	1	FALSE
AKAP12	1995.51	0.384615	0.250204	1.53721	0.124242	1	FALSE
AKAP13	4860.41	0.100035	0.280897	0.356127	0.721746	1	FALSE
AKAP14	0.453876	0.0191583	0.0753303	0.254324	0.799245	1	FALSE
AKAP17A	2193.89	0.196202	0.243617	0.805372	0.420605	1	FALSE
AKAP17BP	17.011	0.0153216	0.290532	0.0527364	0.957942	1	FALSE
AKAP2	0.515991	-0.0224666	0.0769439	-0.291987	0.770297	1	FALSE
AKAP3	14.6445	-0.0945936	0.27258	-0.347031	0.728568	1	FALSE
AKAP4	0.259801	0.0221355	0.0747468	0.29614	0.767123	1	FALSE
AKAP5	52.7159	-0.0243779	0.30435	-0.0800983	0.936159	1	FALSE
AKAP6	179.586	-0.101824	0.285903	-0.356149	0.721729	1	FALSE
AKAP7	179.832	-0.115514	0.269096	-0.429268	0.667728	1	FALSE
AKAP8	1187.25	0.0530337	0.239511	0.221425	0.824762	1	FALSE
AKAP8L	3301.21	0.0511005	0.256532	0.199197	0.842109	1	FALSE
AKAP9	2583.44	0.26963	0.272252	0.990369	0.321994	1	FALSE
AKIP1	541.521	0.015152	0.240392	0.0630305	0.949742	1	FALSE
AKIRIN1	5209.31	-0.0578772	0.241467	-0.239689	0.810571	1	FALSE
AKIRIN2	1424.57	0.334127	0.292273	1.1432	0.252955	1	FALSE
AKIRIN2P1	0.562298	-0.0288625	0.0873698	-0.330349	0.741136	1	FALSE
AKNA	373.329	0.290712	0.266676	1.09013	0.275656	1	FALSE
AKNAD1	17.4391	-0.120129	0.292649	-0.410488	0.681448	1	FALSE
AKR1A1	2746.99	0.157886	0.257124	0.614045	0.539186	1	FALSE
AKR1B1	5515.02	0.201526	0.216407	0.931235	0.351732	1	FALSE
AKR1B10	1.46512	0.00139791	0.117819	0.0118649	0.990533	1	FALSE
AKR1B1P1	0.973271	0.00168858	0.133461	0.0126522	0.989905	1	FALSE
AKR1B1P2	0.958404	-0.00869344	0.103798	-0.0837532	0.933253	1	FALSE
AKR1B1P3	0.976987	-0.0218798	0.116957	-0.187075	0.851602	1	FALSE
AKR1B1P6	0.194744	-0.0210196	0.0747468	-0.281211	0.778549	1	FALSE
AKR1B1P7	0.70277	0.0623142	0.104907	0.593996	0.552515	1	FALSE
AKR1C1	7.21238	-0.0417439	0.260727	-0.160106	0.872798	1	FALSE
AKR1C2	1.38649	0.0864765	0.132957	0.650407	0.515429	1	FALSE
AKR1C3	49.7593	0.555708	0.306917	1.81061	0.0702009	1	FALSE
AKR1C7P	0.462536	0.0220146	0.074767	0.294443	0.768419	1	FALSE
AKR1C8P	1.75139	0.0537801	0.151457	0.355084	0.722526	1	FALSE
AKR1D1	0.316303	0.0221355	0.0747468	0.29614	0.767123	1	FALSE
AKR1E2	16.4427	0.188339	0.298445	0.631067	0.527997	1	FALSE
AKR7A2	911.791	0.368122	0.281396	1.3082	0.190805	1	FALSE
AKR7A2P1	0.294183	0.000772735	0.0747832	0.010333	0.991756	1	FALSE
AKR7A3	15.0858	-0.0780733	0.298461	-0.261587	0.79364	1	FALSE
AKR7L	13.1374	-0.114897	0.277721	-0.413712	0.679085	1	FALSE
AKT1	4830.66	0.204298	0.264948	0.771089	0.440654	1	FALSE
AKT1S1	2175.53	0.399131	0.294586	1.35489	0.175453	1	FALSE
AKT2	5040.38	0.197477	0.233107	0.847154	0.396909	1	FALSE
AKT3	709.935	-0.0984281	0.251738	-0.390994	0.695802	1	FALSE
AKT3-IT1	0.200215	0	0.0747468	0	1	1	FALSE
AKTIP	213.616	0.022323	0.265609	0.0840446	0.933021	1	FALSE
AL008723.1	6.30443	-0.171517	0.247527	-0.692924	0.488357	1	FALSE
AL022237.3	0.916065	0.0364413	0.115022	0.31682	0.75138	1	FALSE
AL022341.3	10.246	0.156052	0.274251	0.569012	0.569348	1	FALSE
AL022344.7	0.583401	-0.0236723	0.0791387	-0.299124	0.764845	1	FALSE
AL022393.9	10.3998	-0.0100912	0.27233	-0.0370549	0.970441	1	FALSE
AL023806.1	5.99097	0.201889	0.235331	0.857893	0.390952	1	FALSE
AL035610.1	14.4414	0.272467	0.296777	0.918088	0.358573	1	FALSE
AL035610.2	0.782763	0.000991411	0.0982496	0.0100907	0.991949	1	FALSE
AL049794.1	1.15466	0.0228382	0.102785	0.222194	0.824163	1	FALSE
AL109767.1	0.683854	0.0321168	0.0941829	0.341005	0.7331	1	FALSE
AL121578.2	1.11417	-0.0633733	0.123566	-0.51287	0.608043	1	FALSE
AL132709.1	169.775	-0.49306	0.307305	-1.60446	0.108612	1	FALSE
AL133168.3	0.511429	0.063136	0.0767328	0.822804	0.41062	1	FALSE
AL133243.1	10.9225	-0.176098	0.284449	-0.619084	0.535861	1	FALSE
AL133243.2	11.0236	-0.0224811	0.284049	-0.0791453	0.936917	1	FALSE
AL133243.4	0.656611	0.0374469	0.100797	0.371507	0.71026	1	FALSE
AL133245.2	0.355142	0.000285724	0.074792	0.00382025	0.996952	1	FALSE
AL133493.2	10.7321	-0.21009	0.277668	-0.756622	0.449276	1	FALSE
AL135787.1	0.250578	0.000557948	0.0747468	0.00746451	0.994044	1	FALSE
AL136419.6	14.9169	0.149055	0.291383	0.511544	0.60897	1	FALSE
AL157871.2	1.02637	0.0127576	0.126143	0.101136	0.919443	1	FALSE
AL161668.5	2.68146	-0.0177478	0.184633	-0.0961252	0.923421	1	FALSE
AL163953.3	59.7498	0.487238	0.305709	1.59379	0.110982	1	FALSE
AL354828.1	0.296355	-0.0417551	0.0747941	-0.558267	0.576662	1	FALSE
AL355480.1	1.28609	-0.13062	0.141169	-0.925276	0.354822	1	FALSE
AL356053.1	3.63587	-0.209163	0.212211	-0.985636	0.324312	1	FALSE
AL356585.1	0.357314	-0.0422661	0.0748032	-0.56503	0.572053	1	FALSE
AL357140.1	0.198878	0.043713	0.0747468	0.584815	0.558672	1	FALSE
AL358852.1	5.60529	-0.00545179	0.239766	-0.0227379	0.981859	1	FALSE
AL360294.1	2.3771	0.0040771	0.172586	0.0236237	0.981153	1	FALSE
AL365181.1	18.2609	-0.340931	0.303436	-1.12357	0.261196	1	FALSE
AL450992.2	24.7994	-0.142636	0.306314	-0.465652	0.641465	1	FALSE
AL513523.2	5.4494	0.0874463	0.208277	0.419856	0.674591	1	FALSE
AL590762.11	1.25619	0.08251	0.13641	0.604869	0.545266	1	FALSE
AL590762.6	1.94071	0.0537537	0.15833	0.339504	0.73423	1	FALSE
AL590762.7	3.27295	-0.168534	0.200604	-0.840131	0.400835	1	FALSE
AL590763.16	39.8265	0.25459	0.301112	0.845498	0.397833	1	FALSE
AL590763.5	0.406702	0	0.074767	0	1	1	FALSE
AL591893.1	1.47899	-0.0673343	0.137599	-0.48935	0.624594	1	FALSE
ALAD	3820.62	0.022556	0.247798	0.0910257	0.927472	1	FALSE
ALAS1	1170.59	-0.00159701	0.26527	-0.0060203	0.995197	1	FALSE
ALAS2	32.1016	-0.00992716	0.30783	-0.0322488	0.974274	1	FALSE
ALB	4.11669	-0.184203	0.225235	-0.817826	0.413456	1	FALSE
ALCAM	746.176	-0.40117	0.275833	-1.4544	0.145836	1	FALSE
ALDH16A1	1364.25	0.227473	0.250744	0.907194	0.364304	1	FALSE
ALDH18A1	2397.46	-0.120241	0.238066	-0.505073	0.613507	1	FALSE
ALDH1A1	129.425	-0.315979	0.302192	-1.04562	0.295736	1	FALSE
ALDH1A2	3.0463	-0.0229947	0.191623	-0.12	0.904483	1	FALSE
ALDH1A3	672.213	0.465536	0.243833	1.90924	0.0562311	1	FALSE
ALDH1B1	1551.75	-0.143933	0.263237	-0.546779	0.58453	1	FALSE
ALDH1L1	6.58979	0.125915	0.254702	0.494364	0.621049	1	FALSE
ALDH1L2	22.8475	-0.00476001	0.295071	-0.0161317	0.987129	1	FALSE
ALDH2	1439.8	0.307121	0.228996	1.34116	0.179868	1	FALSE
ALDH3A1	15.3077	-0.003718	0.290884	-0.0127817	0.989802	1	FALSE
ALDH3A2	4450.37	0.0505788	0.25253	0.200288	0.841255	1	FALSE
ALDH3B1	2.16686	0.194921	0.159191	1.22444	0.220785	1	FALSE
ALDH3B2	0.501375	-0.0044189	0.0841141	-0.0525346	0.958103	1	FALSE
ALDH4A1	284.456	0.111181	0.254115	0.437523	0.661732	1	FALSE
ALDH5A1	164.206	-0.135689	0.271833	-0.499162	0.617665	1	FALSE
ALDH6A1	871.721	0.00199068	0.238294	0.0083539	0.993335	1	FALSE
ALDH7A1	3448.61	-0.0906842	0.219317	-0.413485	0.679251	1	FALSE
ALDH7A1P1	6.1191	-0.148692	0.239456	-0.62096	0.534626	1	FALSE
ALDH8A1	3.03752	-0.00360783	0.192726	-0.01872	0.985064	1	FALSE
ALDH9A1	1710.27	-0.134833	0.2389	-0.564393	0.572487	1	FALSE
ALDOA	44581.6	-0.236938	0.306277	-0.773609	0.439162	1	FALSE
ALDOAP1	3.22155	-0.0517408	0.192104	-0.269338	0.78767	1	FALSE
ALDOAP2	3.26337	-0.225427	0.198199	-1.13738	0.25538	1	FALSE
ALDOC	1299.97	-0.394243	0.30646	-1.28644	0.198289	1	FALSE
ALG1	501.467	0.266303	0.245024	1.08685	0.277104	1	FALSE
ALG10	108.131	-0.267477	0.278667	-0.959845	0.337133	1	FALSE
ALG10B	226.396	-0.315585	0.275651	-1.14487	0.252263	1	FALSE
ALG11	236.261	-0.278797	0.307719	-0.906012	0.36493	1	FALSE
ALG12	797.561	0.322485	0.283396	1.13793	0.25515	1	FALSE
ALG13	924.097	-0.0545964	0.263414	-0.207265	0.835803	1	FALSE
ALG14	228.339	0.100655	0.260881	0.385826	0.699625	1	FALSE
ALG1L	19.6244	0.112749	0.296879	0.37978	0.704109	1	FALSE
ALG1L13P	3.35742	0.184993	0.204495	0.904635	0.365659	1	FALSE
ALG1L15P	0.890863	0.0560128	0.101852	0.549945	0.582357	1	FALSE
ALG1L2	56.3161	-0.200553	0.301302	-0.665619	0.505654	1	FALSE
ALG1L3P	0.406519	0.0223503	0.0747832	0.298868	0.765041	1	FALSE
ALG1L5P	4.61664	0.166704	0.233406	0.714226	0.475087	1	FALSE
ALG1L6P	0.354437	0.000772735	0.0747832	0.010333	0.991756	1	FALSE
ALG1L7P	78.7491	0.108197	0.306596	0.352896	0.724166	1	FALSE
ALG1L8P	4.85589	-0.133987	0.23851	-0.561766	0.574275	1	FALSE
ALG1L9P	5.7209	0.082128	0.237228	0.346198	0.729194	1	FALSE
ALG2	902.657	0.064628	0.233025	0.277344	0.781516	1	FALSE
ALG3	834.996	0.406213	0.307786	1.31979	0.186905	1	FALSE
ALG5	478.736	0.118948	0.27975	0.425194	0.670696	1	FALSE
ALG6	387.311	-0.162436	0.248973	-0.652423	0.514129	1	FALSE
ALG8	1352.01	-0.0875878	0.236489	-0.370367	0.711109	1	FALSE
ALG9	149.125	-0.0729628	0.287873	-0.253455	0.799917	1	FALSE
ALK	60.8134	-0.238196	0.307906	-0.773599	0.439168	1	FALSE
ALKBH1	389.171	-0.120285	0.244659	-0.491642	0.622972	1	FALSE
ALKBH2	304.063	0.258776	0.270011	0.958391	0.337866	1	FALSE
ALKBH3	423.015	0.234602	0.279971	0.837954	0.402057	1	FALSE
ALKBH4	391.222	0.202392	0.28931	0.699569	0.484197	1	FALSE
ALKBH5	2430.62	-0.244786	0.262429	-0.932772	0.350938	1	FALSE
ALKBH6	97.5683	-0.12444	0.300639	-0.41392	0.678933	1	FALSE
ALKBH7	1358.63	0.402618	0.306465	1.31375	0.188931	1	FALSE
ALKBH8	186.97	-0.232374	0.282993	-0.821131	0.411572	1	FALSE
ALMS1	1825.39	-0.116042	0.297953	-0.389465	0.696932	1	FALSE
ALMS1-IT1	54.7498	0.388889	0.301173	1.29125	0.196618	1	FALSE
ALMS1P1	3.11535	-0.038224	0.204377	-0.187027	0.85164	1	FALSE
ALOX12	3.58338	0.156843	0.209364	0.749141	0.453773	1	FALSE
ALOX12-AS1	25.31	0.00833105	0.306845	0.0271507	0.97834	1	FALSE
ALOX12B	11.964	-0.138485	0.277382	-0.499257	0.617598	1	FALSE
ALOX12P2	164.377	0.0533231	0.300275	0.177581	0.859052	1	FALSE
ALOX15	5.08044	-0.289134	0.191285	-1.51154	0.130651	1	FALSE
ALOX15B	3.23288	-0.0557194	0.190586	-0.292359	0.770012	1	FALSE
ALOX5	11.1448	0.0689912	0.271763	0.253865	0.7996	1	FALSE
ALOX5AP	0.818034	-0.0364027	0.0992149	-0.366907	0.713688	1	FALSE
ALOXE3	1.61576	-0.0950615	0.148696	-0.639301	0.522627	1	FALSE
ALPK1	2.88989	0.0648329	0.196679	0.329638	0.741673	1	FALSE
ALPK2	98.5821	0.316204	0.307058	1.02978	0.303111	1	FALSE
ALPK3	5609.67	0.362102	0.284814	1.27136	0.2036	1	FALSE
ALPL	6339.45	0.304298	0.294569	1.03303	0.301591	1	FALSE
ALPPL2	0.49657	-0.0317064	0.0756265	-0.41925	0.675034	1	FALSE
ALS2	2625.41	-0.136962	0.282912	-0.484114	0.628305	1	FALSE
ALS2CL	260.728	-0.0387663	0.295382	-0.131241	0.895584	1	FALSE
ALS2CR11	0.321245	0	0.074767	0	1	1	FALSE
ALS2CR12	5.46168	0.191929	0.241731	0.793977	0.427209	1	FALSE
ALX1	20.0547	0.263561	0.30236	0.871678	0.383384	1	FALSE
ALX3	1.29762	0.0589838	0.121099	0.487069	0.626209	1	FALSE
ALX4	0.461555	0.0147386	0.0753852	0.19551	0.844994	1	FALSE
ALYREF	2363.37	0.296889	0.28288	1.04952	0.293938	1	FALSE
AMACR	72.9381	0.122777	0.300839	0.408116	0.683188	1	FALSE
AMBP	31.1314	-0.132624	0.299316	-0.443091	0.6577	1	FALSE
AMBRA1	3056.25	0.164708	0.230062	0.715927	0.474036	1	FALSE
AMD1	2619.42	-0.0837988	0.271312	-0.308865	0.757424	1	FALSE
AMD1P3	0.753779	-0.103483	0.0995448	-1.03956	0.298545	1	FALSE
AMD1P4	0.262677	-0.0210196	0.0747468	-0.281211	0.778549	1	FALSE
AMDHD1	6.15501	0.159667	0.247362	0.645478	0.518617	1	FALSE
AMDHD2	1205.16	0.0457406	0.236506	0.193402	0.846644	1	FALSE
AMELY	0.449779	-0.0241229	0.0815188	-0.295918	0.767292	1	FALSE
AMER1	898.489	-0.259365	0.264883	-0.979169	0.327497	1	FALSE
AMER2	14.9072	0.0839047	0.288348	0.290985	0.771063	1	FALSE
AMER3	7.33202	-0.0466688	0.25488	-0.183101	0.854719	1	FALSE
AMFR	2188.78	0.049716	0.253639	0.19601	0.844602	1	FALSE
AMH	245.879	-0.326389	0.301652	-1.08201	0.27925	1	FALSE
AMHR2	597.516	0.501362	0.270184	1.85563	0.0635062	1	FALSE
AMIGO1	85.4815	-0.152765	0.298827	-0.511214	0.609201	1	FALSE
AMIGO2	187.093	-0.257779	0.269018	-0.958225	0.337949	1	FALSE
AMMECR1	1938.47	-0.0308522	0.271406	-0.113675	0.909495	1	FALSE
AMMECR1L	1473.63	-0.256773	0.239679	-1.07132	0.284026	1	FALSE
AMMECR1LP1	2.81351	-0.193121	0.199545	-0.967808	0.33314	1	FALSE
AMN	132.971	0.806203	0.307586	2.62107	0.00876552	1	FALSE
AMN1	224.993	0.0532107	0.259235	0.20526	0.837369	1	FALSE
AMOT	1390.86	0.246669	0.286301	0.861572	0.388923	1	FALSE
AMOTL1	5041.41	-0.0376438	0.270676	-0.139073	0.889392	1	FALSE
AMOTL2	4853.46	-0.106664	0.222741	-0.47887	0.632031	1	FALSE
AMPD2	907.018	0.112275	0.277897	0.404017	0.6862	1	FALSE
AMPD3	141.714	0.141687	0.299651	0.472842	0.636326	1	FALSE
AMPH	41.4472	0.203774	0.304933	0.668258	0.503969	1	FALSE
AMT	13.9472	-0.119788	0.297243	-0.402998	0.68695	1	FALSE
AMY2B	27.8079	-0.268954	0.307879	-0.87357	0.382352	1	FALSE
AMZ1	11.9357	0.416659	0.289247	1.44049	0.149728	1	FALSE
AMZ2	1575.27	0.0328603	0.246179	0.133481	0.893813	1	FALSE
AMZ2P1	205.32	-0.0435511	0.286762	-0.151872	0.879288	1	FALSE
ANAPC1	903.504	-0.0446859	0.281182	-0.158922	0.873731	1	FALSE
ANAPC10	282.885	0.105234	0.268226	0.392334	0.694812	1	FALSE
ANAPC10P1	0.260469	0	0.0747468	0	1	1	FALSE
ANAPC11	2391.04	0.594814	0.303228	1.96161	0.0498084	1	FALSE
ANAPC13	802.439	-0.0839486	0.242682	-0.34592	0.729402	1	FALSE
ANAPC15	831.166	0.344888	0.283289	1.21744	0.223436	1	FALSE
ANAPC16	2305.48	-0.25183	0.241402	-1.0432	0.296855	1	FALSE
ANAPC1P1	0.41094	0.000772728	0.0747832	0.0103329	0.991756	1	FALSE
ANAPC2	1055.02	0.151053	0.247875	0.609393	0.542264	1	FALSE
ANAPC4	1160.35	-0.0500541	0.285319	-0.175432	0.86074	1	FALSE
ANAPC5	3557.89	0.11121	0.226292	0.491444	0.623112	1	FALSE
ANAPC7	1565.42	0.218266	0.231021	0.944789	0.344767	1	FALSE
ANG	90.2011	0.207208	0.306388	0.676291	0.498856	1	FALSE
ANGEL1	829.903	-0.0664647	0.290326	-0.228931	0.818922	1	FALSE
ANGEL2	1568.65	-0.183187	0.269004	-0.680982	0.495883	1	FALSE
ANGPT1	642.027	-0.480367	0.252641	-1.90138	0.057252	1	FALSE
ANGPT2	374.548	0.299527	0.299838	0.998962	0.317813	1	FALSE
ANGPT4	53.5518	-0.0799751	0.30298	-0.263961	0.79181	1	FALSE
ANGPTL2	558.911	-0.0839923	0.278295	-0.30181	0.762797	1	FALSE
ANGPTL4	481.218	-0.409595	0.299682	-1.36677	0.171698	1	FALSE
ANGPTL6	3.53109	-0.0507182	0.213397	-0.237671	0.812137	1	FALSE
ANGPTL7	1.063	0.00207685	0.120787	0.0171943	0.986282	1	FALSE
ANGPTL8	0.200215	0	0.0747468	0	1	1	FALSE
ANK1	12.5765	0.2654	0.286733	0.925601	0.354653	1	FALSE
ANK2	2007.08	0.0521188	0.306729	0.169918	0.865075	1	FALSE
ANK3	840.905	0.1009	0.251663	0.400934	0.688469	1	FALSE
ANKAR	49.1809	-0.322904	0.305313	-1.05761	0.290231	1	FALSE
ANKDD1A	1203.92	-0.0669271	0.293118	-0.228328	0.819391	1	FALSE
ANKDD1B	63.8143	-0.421017	0.307492	-1.3692	0.170938	1	FALSE
ANKEF1	426.492	-0.277224	0.240598	-1.15223	0.249228	1	FALSE
ANKFN1	0.614907	0.0010684	0.0909463	0.0117476	0.990627	1	FALSE
ANKFY1	2919.39	0.0144599	0.280384	0.0515719	0.95887	1	FALSE
ANKH	481.024	0.556666	0.255544	2.17836	0.0293794	1	FALSE
ANKHD1	72.5662	-0.0888359	0.307669	-0.288738	0.772782	1	FALSE
ANKHD1-EIF4EBP3	26.7134	0.184352	0.307215	0.600076	0.548455	1	FALSE
ANKIB1	1705.86	-0.205152	0.269707	-0.760649	0.446867	1	FALSE
ANKK1	3.32958	0.0466091	0.205643	0.226651	0.820695	1	FALSE
ANKLE1	165.585	0.178023	0.278143	0.640041	0.522146	1	FALSE
ANKLE2	2680.95	-0.231506	0.263612	-0.878206	0.379832	1	FALSE
ANKMY1	183.695	0.261012	0.278993	0.93555	0.349505	1	FALSE
ANKMY2	1116.84	0.181104	0.231722	0.781558	0.434474	1	FALSE
ANKRA2	310.583	-0.142772	0.271083	-0.526675	0.598419	1	FALSE
ANKRD1	1189.62	0.718821	0.285533	2.51748	0.0118199	1	FALSE
ANKRD10	1728.13	-0.110679	0.264125	-0.419042	0.675185	1	FALSE
ANKRD10-IT1	84.3123	-0.127551	0.300596	-0.424325	0.671329	1	FALSE
ANKRD11	4083.98	0.221055	0.241785	0.914262	0.360579	1	FALSE
ANKRD12	1332.86	0.199083	0.302785	0.657506	0.510856	1	FALSE
ANKRD13A	2505.17	0.0330871	0.246726	0.134105	0.89332	1	FALSE
ANKRD13B	16.7337	0.492276	0.292666	1.68204	0.0925609	1	FALSE
ANKRD13C	751.254	-0.275638	0.273165	-1.00905	0.312949	1	FALSE
ANKRD13D	788.647	0.363841	0.268712	1.35402	0.17573	1	FALSE
ANKRD16	229.627	0.208989	0.276817	0.754972	0.450266	1	FALSE
ANKRD17	4561.17	0.0804921	0.2259	0.356318	0.721603	1	FALSE
ANKRD18A	48.7949	0.0765258	0.307901	0.24854	0.803716	1	FALSE
ANKRD18B	9.97063	0.349063	0.26791	1.30291	0.192604	1	FALSE
ANKRD18CP	113.915	-0.184194	0.307728	-0.598561	0.549466	1	FALSE
ANKRD19P	63.2308	0.268387	0.296771	0.904356	0.365807	1	FALSE
ANKRD20A11P	16.6372	-0.483281	0.289682	-1.66832	0.0952527	1	FALSE
ANKRD20A18P	2.95016	0.155692	0.189644	0.820972	0.411662	1	FALSE
ANKRD20A4	1.03629	0.0133425	0.118612	0.112489	0.910436	1	FALSE
ANKRD20A5P	0.240869	-0.0210196	0.0747468	-0.281211	0.778549	1	FALSE
ANKRD23	6.71697	-0.0865742	0.261561	-0.330991	0.740651	1	FALSE
ANKRD24	113.245	0.537496	0.307768	1.74643	0.0807355	1	FALSE
ANKRD26	730.291	0.147526	0.255044	0.578436	0.56297	1	FALSE
ANKRD26P4	0.255703	-0.0210196	0.0747468	-0.281211	0.778549	1	FALSE
ANKRD27	1484.85	-0.0800715	0.236253	-0.338923	0.734668	1	FALSE
ANKRD28	1238.14	-0.157637	0.246218	-0.640235	0.52202	1	FALSE
ANKRD29	5.93457	-0.0522914	0.249924	-0.209229	0.834269	1	FALSE
ANKRD31	4.97026	-0.00841127	0.237648	-0.0353939	0.971766	1	FALSE
ANKRD33	25.3656	-0.343378	0.269686	-1.27325	0.202929	1	FALSE
ANKRD33B	487.245	0.00563805	0.27386	0.0205874	0.983575	1	FALSE
ANKRD34A	115.058	0.176974	0.30433	0.581521	0.56089	1	FALSE
ANKRD34B	3.95739	0.0486548	0.222777	0.218401	0.827117	1	FALSE
ANKRD35	34.1673	0.151796	0.307459	0.493712	0.621509	1	FALSE
ANKRD36	117.08	0.134515	0.306393	0.439027	0.660642	1	FALSE
ANKRD36B	35.9556	-0.0747836	0.293381	-0.254902	0.798799	1	FALSE
ANKRD36BP2	3.71592	-0.137358	0.213513	-0.643324	0.520014	1	FALSE
ANKRD36C	38.2781	0.0834796	0.298805	0.279379	0.779954	1	FALSE
ANKRD37	131.336	-0.359012	0.299172	-1.20002	0.230132	1	FALSE
ANKRD39	98.1974	0.259921	0.292355	0.889058	0.373972	1	FALSE
ANKRD40	1976.8	-0.268549	0.255177	-1.0524	0.292614	1	FALSE
ANKRD42	404.411	-0.177372	0.284972	-0.62242	0.533666	1	FALSE
ANKRD44	4.67133	-0.0402418	0.229511	-0.175338	0.860814	1	FALSE
ANKRD45	18.1467	-0.11694	0.299346	-0.390652	0.696054	1	FALSE
ANKRD46	670.593	-0.285161	0.244826	-1.16475	0.24412	1	FALSE
ANKRD49	388.908	-0.14636	0.260849	-0.561092	0.574735	1	FALSE
ANKRD50	1385.36	-0.166276	0.29093	-0.571534	0.567638	1	FALSE
ANKRD52	2377.8	-0.0177386	0.274521	-0.0646167	0.948479	1	FALSE
ANKRD53	32.7187	0.883085	0.294124	3.00242	0.00267842	1	FALSE
ANKRD54	346.289	0.259423	0.296349	0.875396	0.381358	1	FALSE
ANKRD6	4374.26	-0.16079	0.275164	-0.584342	0.55899	1	FALSE
ANKRD61	2.90346	-0.151687	0.18275	-0.830027	0.406523	1	FALSE
ANKRD65	17.8099	0.585105	0.299924	1.95084	0.0510755	1	FALSE
ANKRD7	4.47747	-0.0186379	0.225295	-0.0827266	0.934069	1	FALSE
ANKRD9	365.919	0.59129	0.307537	1.92266	0.0545228	1	FALSE
ANKS1A	2305.89	-0.144548	0.249208	-0.580027	0.561896	1	FALSE
ANKS1B	1573.01	-0.234175	0.247814	-0.944961	0.344679	1	FALSE
ANKS3	515.822	0.143757	0.248142	0.579333	0.562364	1	FALSE
ANKS4B	1.55957	0.0537977	0.141269	0.380816	0.70334	1	FALSE
ANKS6	1733.55	-0.118376	0.231747	-0.510796	0.609494	1	FALSE
ANKUB1	0.505958	0.0449618	0.0764266	0.5883	0.556331	1	FALSE
ANKZF1	2330.57	-0.405417	0.291032	-1.39303	0.16361	1	FALSE
ANLN	2489.61	-0.190557	0.274571	-0.694017	0.487671	1	FALSE
ANO1	67.8425	-0.0521213	0.300958	-0.173185	0.862506	1	FALSE
ANO10	2025.62	-0.0547141	0.230584	-0.237285	0.812435	1	FALSE
ANO2	173.159	-0.0106532	0.306421	-0.0347666	0.972266	1	FALSE
ANO3	0.766569	-0.0240585	0.107679	-0.223428	0.823203	1	FALSE
ANO4	137.911	-0.00804899	0.299647	-0.0268616	0.97857	1	FALSE
ANO5	204.035	0.0758566	0.278432	0.272442	0.785282	1	FALSE
ANO6	2581.03	-0.0487613	0.260391	-0.187262	0.851455	1	FALSE
ANO7	112.446	0.170893	0.297261	0.574893	0.565364	1	FALSE
ANO7L1	7.10011	-0.108394	0.245796	-0.440991	0.659219	1	FALSE
ANO8	897.959	0.0427069	0.263327	0.162182	0.871162	1	FALSE
ANO9	449.449	-0.223342	0.291064	-0.767328	0.442887	1	FALSE
ANOS1	413.024	0.076993	0.266098	0.28934	0.772321	1	FALSE
ANOS2P	284.429	-0.0262088	0.272924	-0.0960295	0.923497	1	FALSE
ANP32A	9736.19	-0.119649	0.236528	-0.505855	0.612958	1	FALSE
ANP32AP1	6.38098	-0.10747	0.255807	-0.420122	0.674396	1	FALSE
ANP32B	6727.35	0.249727	0.252289	0.989846	0.32225	1	FALSE
ANP32BP1	9.60146	-0.0438283	0.281346	-0.155781	0.876206	1	FALSE
ANP32BP3	1.01838	0.000349904	0.119496	0.00292816	0.997664	1	FALSE
ANP32C	8.76663	0.269904	0.267664	1.00837	0.313278	1	FALSE
ANP32D	2.33652	0.0447883	0.158569	0.282454	0.777596	1	FALSE
ANP32E	2850.92	-0.332805	0.246752	-1.34875	0.177419	1	FALSE
ANPEP	33.6035	0.557558	0.289028	1.92908	0.053721	1	FALSE
ANTXR1	1570.71	-0.0790756	0.230719	-0.342736	0.731797	1	FALSE
ANTXR2	153.878	0.444165	0.274446	1.6184	0.105576	1	FALSE
ANTXRLP1	0.194744	-0.0210196	0.0747468	-0.281211	0.778549	1	FALSE
ANXA1	68.83	0.267083	0.304603	0.876825	0.380582	1	FALSE
ANXA11	4754.6	0.196076	0.270979	0.723584	0.469321	1	FALSE
ANXA13	0.569617	0.0294066	0.0877409	0.335152	0.73751	1	FALSE
ANXA2	10982.4	0.475737	0.260376	1.82712	0.0676818	1	FALSE
ANXA2P1	3.06612	-0.021025	0.167152	-0.125784	0.899903	1	FALSE
ANXA2P2	32.2058	-0.0309838	0.307575	-0.100736	0.91976	1	FALSE
ANXA2P3	1.86343	-0.0525192	0.174659	-0.300695	0.763647	1	FALSE
ANXA2R	12.2491	0.353346	0.272811	1.29521	0.195249	1	FALSE
ANXA3	1282.01	0.189387	0.259783	0.729022	0.465988	1	FALSE
ANXA4	582.982	0.365705	0.270106	1.35393	0.175758	1	FALSE
ANXA5	8784.96	0.146515	0.233687	0.626969	0.53068	1	FALSE
ANXA6	8673.81	0.584372	0.236645	2.46941	0.0135337	1	FALSE
ANXA7	2877.55	0.169562	0.22081	0.767907	0.442542	1	FALSE
ANXA8L1	9.20558	-0.108508	0.270588	-0.40101	0.688413	1	FALSE
ANXA9	7.5895	0.059837	0.249509	0.239819	0.810471	1	FALSE
AOAH	4.09139	0.106217	0.226	0.469986	0.638365	1	FALSE
AOC2	38.3625	-0.351585	0.307714	-1.14257	0.253216	1	FALSE
AOC3	18.5663	-0.176193	0.301934	-0.583548	0.559524	1	FALSE
AOC4P	0.355487	0.0435922	0.074767	0.583041	0.559866	1	FALSE
AOX1	357.589	0.0724106	0.267842	0.270348	0.786893	1	FALSE
AP000221.1	0.335506	-0.0417551	0.0747941	-0.558267	0.576662	1	FALSE
AP000223.42	1.36394	0.0494887	0.129545	0.382018	0.702448	1	FALSE
AP000230.1	5.15433	0.0618464	0.225793	0.273908	0.784155	1	FALSE
AP000233.4	0.200215	0	0.0747468	0	1	1	FALSE
AP000240.9	1.63809	0.0598529	0.161477	0.370658	0.710892	1	FALSE
AP000251.3	22.1934	0.135771	0.302389	0.448993	0.653437	1	FALSE
AP000253.1	0.513783	0	0.0852431	0	1	1	FALSE
AP000254.8	11.8027	0.185983	0.273527	0.679945	0.496539	1	FALSE
AP000255.6	6.38708	-0.0059981	0.256119	-0.0234192	0.981316	1	FALSE
AP000265.1	1.14624	0.0118524	0.122846	0.0964814	0.923138	1	FALSE
AP000266.7	1.14267	0.023206	0.121935	0.190314	0.849063	1	FALSE
AP000280.66	0.416411	0.0220146	0.074767	0.294443	0.768419	1	FALSE
AP000281.1	2.78034	-0.124604	0.196723	-0.633398	0.526474	1	FALSE
AP000302.58	0.60467	-0.0500126	0.0905163	-0.552526	0.580588	1	FALSE
AP000318.2	13.0536	-0.107816	0.292041	-0.369182	0.711992	1	FALSE
AP000320.6	2.88737	0.126631	0.188586	0.671476	0.501917	1	FALSE
AP000320.7	3.16745	-0.0521958	0.200631	-0.260158	0.794742	1	FALSE
AP000343.1	0.462569	0.0477523	0.0823214	0.580072	0.561866	1	FALSE
AP000344.3	6.29935	-0.00787992	0.238941	-0.0329785	0.973692	1	FALSE
AP000344.4	6.5472	0.0920282	0.251977	0.365224	0.714944	1	FALSE
AP000345.1	0.259801	0.0221355	0.0747468	0.29614	0.767123	1	FALSE
AP000345.4	1.2305	0.0953865	0.128141	0.744388	0.456642	1	FALSE
AP000347.2	54.991	0.459594	0.307779	1.49326	0.135369	1	FALSE
AP000347.4	3.95802	0.168152	0.216714	0.775918	0.437797	1	FALSE
AP000349.2	1.00041	0.0132052	0.088724	0.148834	0.881685	1	FALSE
AP000350.5	18.7935	0.198188	0.287701	0.688867	0.490907	1	FALSE
AP000351.13	0.805828	0.0480592	0.090233	0.532613	0.594302	1	FALSE
AP000351.3	5.81324	0.0475114	0.247457	0.191999	0.847743	1	FALSE
AP000354.2	1.49212	0.0538541	0.140764	0.382585	0.702027	1	FALSE
AP000357.4	0.724867	-0.0601389	0.0948497	-0.634044	0.526052	1	FALSE
AP000361.2	0.263023	0.0221355	0.0747468	0.29614	0.767123	1	FALSE
AP000432.1	8.86843	0.141277	0.271077	0.521171	0.602248	1	FALSE
AP000436.4	0.70172	0.0265626	0.0863478	0.307623	0.758369	1	FALSE
AP000437.3	6.19609	0.243976	0.226003	1.07953	0.280352	1	FALSE
AP000438.2	9.58624	-0.106822	0.272476	-0.392041	0.695028	1	FALSE
AP000442.1	7.01272	-0.1715	0.263649	-0.650486	0.515378	1	FALSE
AP000477.3	0.736605	-0.0159744	0.0863489	-0.184998	0.85323	1	FALSE
AP000487.5	6.46607	0.144712	0.254386	0.568868	0.569446	1	FALSE
AP000560.3	0.457098	0.02641	0.081993	0.322101	0.747376	1	FALSE
[truncated: 27,884 more rows]

## Sheet: S3E
gene_short_name	baseMean	log2FoldChange	lfcSE	stat	pvalue	padj	differentially_expressed
LINC00617	661.659	5.15855	0.338552	15.2371	2.0065e-52	7.5647e-48	TRUE
KPNA6	2739.67	0.80277	0.176327	4.55275	5.29499e-06	0.0697346	FALSE
SDK2	535.646	1.22853	0.27043	4.54288	5.54902e-06	0.0697346	FALSE
NACA2	4.35916	-1.97174	0.465696	-4.23396	2.29617e-05	0.156417	FALSE
NKX6-3	7.77279	-1.88773	0.445643	-4.23597	2.27569e-05	0.156417	FALSE
NSUN5P2	307.454	-0.983228	0.233227	-4.21577	2.48932e-05	0.156417	FALSE
AC009362.2	1.48274	-1.77462	0.430553	-4.12171	3.76069e-05	0.202546	FALSE
ANKRD36BP2	14.5065	1.84283	0.458003	4.02363	5.73076e-05	0.240061	FALSE
TAF3	451.952	1.12238	0.278906	4.02422	5.71633e-05	0.240061	FALSE
RBM46	20.2016	1.81733	0.458556	3.96317	7.39617e-05	0.278843	FALSE
ASB8	468.692	0.681266	0.180217	3.78025	0.00015667	0.370681	FALSE
CFAP73	37.3254	-1.67533	0.441067	-3.79835	0.000145663	0.370681	FALSE
MAGEA4	8.18386	1.72333	0.455007	3.78747	0.000152187	0.370681	FALSE
NOXA1	398.163	-1.22506	0.323815	-3.78321	0.000154822	0.370681	FALSE
RP3-402G11.26	55.5936	-1.02472	0.271144	-3.77923	0.000157314	0.370681	FALSE
TELO2	1323.61	-0.995417	0.257735	-3.86218	0.000112381	0.370681	FALSE
RHPN1	2045.7	-1.1651	0.311097	-3.74513	0.000180298	0.399848	FALSE
MEGF6	2535.43	-0.907666	0.243424	-3.72874	0.000192438	0.403062	FALSE
ABL2	1206.13	0.982694	0.272819	3.602	0.000315773	0.415172	FALSE
CCDC189	370.835	-0.993848	0.277517	-3.58122	0.000341998	0.415172	FALSE
CIAPIN1P	4.04097	-1.66406	0.456551	-3.64485	0.000267551	0.415172	FALSE
CTD-2021A8.2	5.78693	-1.64532	0.457068	-3.59972	0.000318559	0.415172	FALSE
DHTKD1	1112.79	0.789475	0.21371	3.69414	0.000220636	0.415172	FALSE
GMEB1	462.44	0.652127	0.182495	3.57339	0.000352392	0.415172	FALSE
MT-ND5	47806.5	1.20422	0.32988	3.65049	0.000261742	0.415172	FALSE
NRXN3	459.275	0.923083	0.251942	3.66387	0.000248436	0.415172	FALSE
PHACTR4	2225.13	0.849052	0.237431	3.576	0.000348898	0.415172	FALSE
RP11-385F7.1	19.5874	-1.28221	0.350284	-3.66048	0.000251745	0.415172	FALSE
RP11-46F15.2	7.24585	-1.54905	0.428731	-3.6131	0.000302559	0.415172	FALSE
RP11-977G19.5	185.596	-1.07285	0.296337	-3.62038	0.000294173	0.415172	FALSE
TUBGCP4	1208.99	0.762819	0.212053	3.5973	0.000321537	0.415172	FALSE
ZNF791	818.507	0.993456	0.274437	3.61997	0.000294632	0.415172	FALSE
KIF3B	2307.07	0.757831	0.212838	3.56061	0.000369999	0.422708	FALSE
RP11-1055B8.4	255.805	-0.984292	0.278772	-3.53081	0.000414295	0.459392	FALSE
IZUMO4	171.366	-1.11118	0.320601	-3.46592	0.000528422	0.538434	FALSE
MAP1B	5143.52	1.15287	0.332605	3.46619	0.000527894	0.538434	FALSE
TOB1	819.507	0.707797	0.203699	3.47471	0.000511401	0.538434	FALSE
CHTF18	974.689	-0.944881	0.273434	-3.4556	0.000549063	0.544742	FALSE
AAK1	1210.4	0.977329	0.294073	3.32342	0.000889204	0.571121	FALSE
ACADVL	12546.1	-0.71398	0.216694	-3.29487	0.000984666	0.571121	FALSE
ARHGEF16	1895.93	-0.700861	0.20861	-3.35967	0.000780362	0.571121	FALSE
C14orf132	2410.01	0.991785	0.298597	3.32148	0.000895419	0.571121	FALSE
CAMK1D	660.063	1.0087	0.305195	3.30509	0.00094946	0.571121	FALSE
CHD7	6705.91	0.828678	0.251223	3.29857	0.000971777	0.571121	FALSE
CNTNAP2	328.985	0.851021	0.249439	3.41174	0.000645492	0.571121	FALSE
CRACR2B	751.557	-0.96731	0.293273	-3.29832	0.00097264	0.571121	FALSE
EXD3	658.306	-1.1057	0.324158	-3.411	0.000647261	0.571121	FALSE
GRIN2D	35.3738	1.18746	0.35833	3.31388	0.000920099	0.571121	FALSE
GTF2IP4	538.662	1.06787	0.312428	3.41797	0.000630891	0.571121	FALSE
HEXDC	1293.15	-0.930732	0.281306	-3.30861	0.000937619	0.571121	FALSE
MFSD7	156.503	-0.830831	0.249541	-3.32944	0.000870194	0.571121	FALSE
MICALL2	270.903	-0.807641	0.24188	-3.33901	0.000840764	0.571121	FALSE
MKLN1-AS	21.0218	1.21594	0.359121	3.38588	0.000709513	0.571121	FALSE
NIT2	1618.78	-0.68076	0.198374	-3.4317	0.000599801	0.571121	FALSE
NKD1	138.78	1.19954	0.358262	3.34821	0.000813351	0.571121	FALSE
PGAP3	841.532	-0.768748	0.232551	-3.30572	0.000947342	0.571121	FALSE
PROSC	807.191	0.501126	0.150393	3.33212	0.000861879	0.571121	FALSE
RP11-2C24.3	4.91373	1.48042	0.441076	3.35637	0.000789723	0.571121	FALSE
RP11-465B22.8	92.9382	-1.22896	0.367818	-3.34121	0.000834151	0.571121	FALSE
RTL1	650.774	1.30799	0.390716	3.34768	0.000814919	0.571121	FALSE
SH2B1	1616.29	-0.495975	0.149071	-3.32711	0.000877506	0.571121	FALSE
TBL1X	1790.28	0.49848	0.150262	3.31741	0.000908578	0.571121	FALSE
TEKT2	907.668	-1.07248	0.321666	-3.33415	0.000855604	0.571121	FALSE
TMSB4XP4	13.0306	-1.30288	0.389469	-3.34526	0.000822048	0.571121	FALSE
ZNF8	792.953	0.903897	0.265972	3.39846	0.000677655	0.571121	FALSE
PARP10	215.488	-0.890448	0.27139	-3.28107	0.00103415	0.581916	FALSE
TSNAXIP1	311.008	-0.925065	0.281638	-3.28459	0.0010213	0.581916	FALSE
CYP2W1	6.8494	-1.45953	0.44544	-3.2766	0.00105067	0.582517	FALSE
DUS1L	1476.17	-0.796866	0.244075	-3.26483	0.00109528	0.593442	FALSE
SLIT3	613.804	0.683038	0.209319	3.26314	0.00110185	0.593442	FALSE
EIF4EBP2	7186.98	0.666789	0.204678	3.25774	0.00112303	0.596326	FALSE
ADAT1	625.367	0.897085	0.280289	3.20057	0.00137157	0.601941	FALSE
ADCY9	327.963	0.860858	0.277266	3.10481	0.00190403	0.601941	FALSE
AK3P3	26.487	1.23096	0.404709	3.0416	0.00235328	0.601941	FALSE
AMDHD2	435.782	-1.08332	0.350018	-3.09504	0.00196788	0.601941	FALSE
ARID1A	5826.55	0.769633	0.248747	3.09404	0.00197454	0.601941	FALSE
ARVCF	2001.3	-0.576837	0.183217	-3.14837	0.00164182	0.601941	FALSE
ATAD3B	638.709	-0.659181	0.203529	-3.23875	0.00120053	0.601941	FALSE
BRAT1	1192.26	-0.828024	0.269568	-3.07167	0.00212862	0.601941	FALSE
CBX5	13420.9	0.870515	0.277412	3.13798	0.00170115	0.601941	FALSE
CCNK	1897.4	0.673384	0.215218	3.12885	0.00175491	0.601941	FALSE
CDK10	2887.19	-0.81804	0.257866	-3.17235	0.00151212	0.601941	FALSE
CENPT	1343.25	-0.660975	0.215385	-3.06881	0.00214915	0.601941	FALSE
CHD8	4592.56	0.750253	0.241132	3.11138	0.00186212	0.601941	FALSE
CLPB	275.253	0.84933	0.270174	3.14365	0.00166857	0.601941	FALSE
COPA	6115.28	0.569438	0.177186	3.21379	0.00130994	0.601941	FALSE
CTD-2227E11.1	235.641	-1.17642	0.374635	-3.14018	0.00168846	0.601941	FALSE
CTD-2651B20.4	4.0412	1.41333	0.447362	3.15926	0.00158171	0.601941	FALSE
DCAF10	1037.92	0.828131	0.257568	3.21519	0.00130357	0.601941	FALSE
DCP1A	1470.76	0.67477	0.219184	3.07855	0.00208007	0.601941	FALSE
DENND6B	825.678	-0.879277	0.274813	-3.19955	0.00137643	0.601941	FALSE
DIS3L	912.883	0.623747	0.195489	3.19071	0.00141926	0.601941	FALSE
DSTYK	761.078	0.764633	0.247713	3.08678	0.0020234	0.601941	FALSE
ENTPD8	138.725	-0.915406	0.282561	-3.23968	0.00119664	0.601941	FALSE
FAM161B	65.0701	0.753763	0.235208	3.20466	0.0013522	0.601941	FALSE
FAM193A	1318.03	0.535119	0.176239	3.03632	0.00239482	0.601941	FALSE
FMR1-IT1	9.871	1.3668	0.439045	3.11312	0.00185121	0.601941	FALSE
FTO	1114.02	0.702465	0.227657	3.08563	0.00203124	0.601941	FALSE
GSDMD	614.396	-1.03149	0.33334	-3.0944	0.00197215	0.601941	FALSE
KCND3	625.924	1.2722	0.399814	3.18199	0.00146269	0.601941	FALSE
KSR2	123.264	1.17231	0.376305	3.11532	0.00183745	0.601941	FALSE
LIME1	73.6486	-0.990286	0.325183	-3.04532	0.00232431	0.601941	FALSE
LINC01089	656.51	-0.825022	0.268778	-3.06953	0.00214397	0.601941	FALSE
MAPK15	1244.21	-1.23578	0.392711	-3.14679	0.00165074	0.601941	FALSE
METTL16	1350.48	0.527855	0.166416	3.1719	0.00151445	0.601941	FALSE
MTATP6P1	3993.9	1.07165	0.336737	3.18246	0.00146027	0.601941	FALSE
NECTIN1	1881.72	0.604737	0.188946	3.20058	0.00137153	0.601941	FALSE
NPAS3	183.974	1.16401	0.363157	3.20526	0.00134941	0.601941	FALSE
NPEPL1	616.76	-0.945831	0.297892	-3.17508	0.00149798	0.601941	FALSE
PDIA2	52.2747	-1.10924	0.359585	-3.08478	0.00203705	0.601941	FALSE
POTEF	17.6227	1.32643	0.436825	3.03653	0.00239317	0.601941	FALSE
PPARA	1096.2	0.855222	0.272564	3.13769	0.00170284	0.601941	FALSE
PPP1R12C	2107.62	-0.647094	0.210938	-3.0677	0.00215714	0.601941	FALSE
PRKAR2A	1630.91	0.871783	0.271012	3.21677	0.00129645	0.601941	FALSE
R3HDM1	1426	0.696869	0.227694	3.06055	0.00220933	0.601941	FALSE
RAB3B	10606.4	0.894712	0.289185	3.09391	0.00197539	0.601941	FALSE
RAD54L2	1793.91	0.7633	0.247866	3.07948	0.00207363	0.601941	FALSE
RHOT2	2698.47	-0.877131	0.28813	-3.04422	0.00233287	0.601941	FALSE
RP11-134K1.2	1.38429	-1.38841	0.43854	-3.16598	0.00154561	0.601941	FALSE
RP11-443B20.1	35.8133	1.06147	0.345087	3.07595	0.0020983	0.601941	FALSE
RP11-706O15.7	33.7183	1.36233	0.433198	3.14483	0.00166183	0.601941	FALSE
RP11-7F18.2	30.6921	-0.954765	0.311576	-3.06431	0.00218171	0.601941	FALSE
RP4-673D20.3	7.37447	1.36351	0.425763	3.2025	0.00136241	0.601941	FALSE
RP5-1039K5.12	239.277	0.830417	0.267107	3.10894	0.00187762	0.601941	FALSE
RPS11P5	14.1539	-1.24374	0.401813	-3.09531	0.00196606	0.601941	FALSE
RUNDC1	874.981	0.569458	0.185342	3.07247	0.00212296	0.601941	FALSE
SAMHD1	366.644	0.758666	0.240311	3.15702	0.00159389	0.601941	FALSE
SCAF4	1565.7	0.579621	0.184107	3.14828	0.00164236	0.601941	FALSE
SEMA5A	377.154	1.07018	0.344943	3.10249	0.001919	0.601941	FALSE
SF3A1	3102.95	0.644816	0.204122	3.15898	0.00158324	0.601941	FALSE
SLC35E1	1383.25	0.634606	0.208585	3.04243	0.00234673	0.601941	FALSE
SLC6A3	6.13551	1.33061	0.426917	3.11678	0.00182836	0.601941	FALSE
SPEF1	159.738	-1.17073	0.375193	-3.12033	0.0018065	0.601941	FALSE
SPPL2B	2144.25	-0.762163	0.238974	-3.18931	0.00142614	0.601941	FALSE
STK11IP	629.459	-0.686136	0.226057	-3.03523	0.00240354	0.601941	FALSE
STPG3-AS1	22.0998	-1.19227	0.392644	-3.03652	0.00239323	0.601941	FALSE
TAF8	744.836	0.605416	0.199524	3.03431	0.00241089	0.601941	FALSE
TENM2	190.669	1.05307	0.346222	3.04161	0.00235319	0.601941	FALSE
TMEM259	4042.78	-0.711059	0.233174	-3.04948	0.00229239	0.601941	FALSE
TP53I13	1376.81	-0.9497	0.310977	-3.05392	0.00225871	0.601941	FALSE
TRIM9	64.0038	0.995847	0.313006	3.18156	0.00146483	0.601941	FALSE
TRMT2A	882.21	-0.726408	0.23515	-3.08913	0.00200743	0.601941	FALSE
TTC28	1287.36	0.85292	0.269147	3.16898	0.00152976	0.601941	FALSE
TTC7B	731.197	0.681419	0.219702	3.10156	0.00192501	0.601941	FALSE
UBXN11	2213.59	-0.924957	0.293533	-3.15112	0.00162648	0.601941	FALSE
USP10	2277.73	0.569731	0.186173	3.06022	0.00221174	0.601941	FALSE
VILL	250.376	-0.976461	0.319373	-3.05743	0.00223241	0.601941	FALSE
WASH2P	199.203	-0.779451	0.253318	-3.07697	0.00209117	0.601941	FALSE
WIPF2	1734.59	0.732557	0.238107	3.07658	0.00209389	0.601941	FALSE
ZBTB43	597.374	0.841121	0.266196	3.15978	0.00157886	0.601941	FALSE
ZNF887P	28.5566	1.14168	0.358033	3.18876	0.00142887	0.601941	FALSE
C1orf194	247.311	-1.28872	0.425108	-3.0315	0.00243338	0.603559	FALSE
NFX1	1119.1	0.490304	0.162006	3.02646	0.00247439	0.607319	FALSE
NOVA2	280.904	1.24824	0.41255	3.02568	0.00248076	0.607319	FALSE
HIVEP3	114.476	0.786151	0.260048	3.0231	0.00250203	0.607511	FALSE
SGSM3	2763.94	-0.824887	0.27299	-3.02168	0.00251377	0.607511	FALSE
CTD-2619J13.17	87.2783	0.735908	0.244478	3.01011	0.00261151	0.607758	FALSE
DNAJC18	676.928	0.706695	0.234746	3.01047	0.00260845	0.607758	FALSE
FITM2	224.391	0.821706	0.272918	3.01081	0.00260548	0.607758	FALSE
LTK	32.5611	-1.07602	0.357308	-3.01145	0.00260001	0.607758	FALSE
RUNX1T1	472.875	1.15343	0.382398	3.0163	0.00255878	0.607758	FALSE
ZHX3	453.707	0.876726	0.29036	3.01944	0.0025324	0.607758	FALSE
AAMP	2885.65	-0.667169	0.223719	-2.98218	0.00286208	0.609146	FALSE
BPTF	4575.38	0.837393	0.280468	2.9857	0.00282933	0.609146	FALSE
BRD3	3188.48	0.546205	0.182545	2.99216	0.0027701	0.609146	FALSE
BRICD5	323.686	-0.797108	0.266313	-2.99313	0.00276135	0.609146	FALSE
CDKAL1	1013.43	0.882053	0.296414	2.97575	0.00292274	0.609146	FALSE
CTC-429P9.5	64.4888	1.29353	0.433496	2.98395	0.00284557	0.609146	FALSE
DPH7	1156.03	-0.635532	0.213602	-2.97531	0.00292695	0.609146	FALSE
GAREM1	280.091	0.875557	0.291327	3.0054	0.00265228	0.609146	FALSE
KIF12	2732.02	-0.921202	0.307867	-2.9922	0.00276971	0.609146	FALSE
MIEF1	1711.15	0.594328	0.199963	2.9722	0.00295678	0.609146	FALSE
MST1	346.501	-0.727393	0.244479	-2.97528	0.00292724	0.609146	FALSE
PHAX	1052.2	0.6041	0.201667	2.99554	0.00273963	0.609146	FALSE
SCNN1D	172.816	-0.94757	0.318342	-2.97658	0.00291486	0.609146	FALSE
SEMA3B	665.404	-0.865173	0.289622	-2.98725	0.00281499	0.609146	FALSE
SEZ6	142.595	1.17614	0.391272	3.00593	0.00264769	0.609146	FALSE
SHC2	3425.67	-0.751461	0.250735	-2.99703	0.0027262	0.609146	FALSE
SNAPC4	955.541	-0.575436	0.19354	-2.97322	0.00294693	0.609146	FALSE
SRGAP1	1037.81	0.779112	0.259731	2.99969	0.00270251	0.609146	FALSE
TYMP	87.4137	-1.25836	0.422184	-2.98061	0.00287679	0.609146	FALSE
UBE4B	2082.75	0.647474	0.217103	2.98234	0.00286058	0.609146	FALSE
ULK3	801.056	-0.547308	0.183214	-2.98726	0.0028149	0.609146	FALSE
MFSD4B	530.53	1.12178	0.37812	2.96673	0.00300983	0.614929	FALSE
NMT2	1050.57	0.527375	0.17781	2.96595	0.00301748	0.614929	FALSE
NAT9	994.503	-0.816209	0.275451	-2.96317	0.00304485	0.617172	FALSE
CAPN10	944.761	-0.734996	0.24868	-2.9556	0.00312064	0.621577	FALSE
CEBPA-AS1	67.4941	-0.976776	0.330594	-2.95461	0.00313069	0.621577	FALSE
METTL2A	411.166	0.705251	0.238827	2.95298	0.00314718	0.621577	FALSE
MUC20P1	14.3781	1.13529	0.385128	2.94783	0.00320012	0.621577	FALSE
RHBDL1	80.0395	-0.863534	0.292987	-2.94734	0.00320516	0.621577	FALSE
RP11-93H24.3	42.4202	-1.02594	0.34819	-2.94648	0.00321412	0.621577	FALSE
TMPRSS5	42.7458	-0.868343	0.294713	-2.9464	0.00321497	0.621577	FALSE
VPS53	1495.42	0.740916	0.250692	2.95548	0.00312182	0.621577	FALSE
ZNF264	1074.39	0.849545	0.288118	2.9486	0.00319221	0.621577	FALSE
ASAP1	1784.48	0.90409	0.307236	2.94265	0.00325414	0.622763	FALSE
NT5C3AP1	6.6471	-1.23159	0.418514	-2.94276	0.00325296	0.622763	FALSE
CCDC74A	135.051	-0.828843	0.282351	-2.9355	0.00333006	0.630887	FALSE
ZFHX3	2663.93	1.03505	0.352541	2.93598	0.003325	0.630887	FALSE
MICAL1	5800.51	-0.684702	0.233413	-2.93344	0.0033523	0.631925	FALSE
NCKAP5	76.4181	0.971632	0.331493	2.93107	0.00337792	0.633586	FALSE
CDK5RAP3	3825.71	-0.768954	0.262495	-2.92941	0.00339611	0.633845	FALSE
SYT16	134.401	1.26482	0.432452	2.92475	0.0034473	0.637092	FALSE
ZFHX4	383.454	0.999493	0.341651	2.92547	0.00343931	0.637092	FALSE
ADAMTS13	508.16	-0.736074	0.251894	-2.92216	0.00347611	0.63899	FALSE
ISG20L2	970.261	0.579183	0.198364	2.9198	0.00350261	0.63899	FALSE
SOX1	31.454	1.34171	0.459604	2.91928	0.00350842	0.63899	FALSE
ANK1	172.756	0.994414	0.341262	2.91393	0.0035691	0.640233	FALSE
FBF1	179.079	-0.868268	0.298052	-2.91315	0.00357808	0.640233	FALSE
MT-ND4L	7589.6	1.02304	0.351235	2.9127	0.00358317	0.640233	FALSE
PRKX	384.256	0.697304	0.23905	2.91698	0.0035344	0.640233	FALSE
MAP1A	968.551	0.872152	0.299623	2.91083	0.00360469	0.641039	FALSE
NOL9	715.885	0.781063	0.268615	2.90774	0.00364048	0.641354	FALSE
RPL23AP42	19.4707	-1.08429	0.372754	-2.90886	0.00362755	0.641354	FALSE
OSBPL7	447.416	-0.673093	0.231634	-2.90585	0.0036626	0.64225	FALSE
DSCAM	115.473	0.996073	0.343131	2.90289	0.00369731	0.642802	FALSE
MYL5	291.282	-0.865748	0.298701	-2.89838	0.003751	0.642802	FALSE
PCED1A	1295.98	-0.834855	0.287867	-2.90014	0.00373001	0.642802	FALSE
SIMC1	416.919	0.517778	0.178494	2.90082	0.00372184	0.642802	FALSE
ZMYND10	185.07	-1.23516	0.425961	-2.89971	0.00373509	0.642802	FALSE
CTA-315H11.2	36.7333	1.25754	0.434679	2.89303	0.00381542	0.645045	FALSE
RPL7L1	1968.32	0.766282	0.264871	2.89303	0.00381539	0.645045	FALSE
SAMD12	362.998	1.01561	0.351019	2.89331	0.003812	0.645045	FALSE
RP11-715J22.6	100.112	0.839518	0.290627	2.88864	0.00386907	0.651196	FALSE
CATIP	137.751	-1.1326	0.394443	-2.87139	0.00408667	0.655306	FALSE
CRK	1579.92	0.559406	0.194404	2.87754	0.0040079	0.655306	FALSE
DCAF7	5348.87	0.596894	0.207455	2.87722	0.00401195	0.655306	FALSE
DLGAP1	124.719	0.914744	0.31884	2.86897	0.00411805	0.655306	FALSE
NAV1	2179.44	1.05149	0.364595	2.88399	0.00392671	0.655306	FALSE
NFASC	1043.21	1.20394	0.418097	2.87956	0.00398229	0.655306	FALSE
ODF3B	221.555	-1.2414	0.432128	-2.87277	0.00406891	0.655306	FALSE
OGFOD1	725.977	0.394307	0.137262	2.87267	0.00407017	0.655306	FALSE
PCDHGB5	17.1992	1.29825	0.451971	2.87242	0.00407346	0.655306	FALSE
RP11-568A7.1	1.19407	1.23161	0.428583	2.87369	0.00405709	0.655306	FALSE
RP11-70P17.1	4.50343	1.27833	0.445684	2.86823	0.0041277	0.655306	FALSE
SDK1	1375.64	0.72706	0.253549	2.86753	0.00413683	0.655306	FALSE
TACC1	1124.09	0.771612	0.268278	2.87616	0.00402539	0.655306	FALSE
TNRC6C	808.846	0.843317	0.293701	2.87135	0.00408726	0.655306	FALSE
ENKD1	603.867	-0.948865	0.331102	-2.86578	0.00415987	0.655342	FALSE
NSUN4	569.021	0.603657	0.210733	2.86456	0.00417587	0.655342	FALSE
PRRC2C	9285.33	0.785083	0.274164	2.86355	0.00418921	0.655342	FALSE
LINC00674	56.0764	1.12884	0.394952	2.85817	0.00426086	0.659476	FALSE
N4BP1	1681.47	0.435973	0.152528	2.85831	0.004259	0.659476	FALSE
UBA6-AS1	294.223	-0.370929	0.129803	-2.85763	0.00426812	0.659476	FALSE
LPIN1	530.387	0.575368	0.20156	2.85458	0.0043094	0.663138	FALSE
CAPN6	1761.55	0.699593	0.245639	2.84806	0.00439869	0.674126	FALSE
BEST4	81.923	-1.04102	0.366213	-2.84267	0.00447377	0.674662	FALSE
C21orf2	786.406	-0.770186	0.270844	-2.84365	0.00445994	0.674662	FALSE
CCDC74B	63.3565	-0.891001	0.313379	-2.8432	0.00446624	0.674662	FALSE
LINC01128	389.14	0.867642	0.305065	2.84412	0.00445338	0.674662	FALSE
NCOA6	2083.36	0.674264	0.237318	2.84118	0.00449469	0.675116	FALSE
CD37	3.96992	1.21453	0.427664	2.83991	0.00451266	0.675126	FALSE
APBB3	522.049	-0.657717	0.231973	-2.83532	0.00457801	0.680586	FALSE
ARSA	575.241	-0.58135	0.2051	-2.83447	0.00459019	0.680586	FALSE
CDC42BPB	4269.86	0.502941	0.177573	2.83231	0.00462137	0.680586	FALSE
MAP3K9	1820.26	0.718458	0.253576	2.83331	0.0046069	0.680586	FALSE
CMIP	2016.93	0.747516	0.264227	2.82907	0.00466836	0.682634	FALSE
PLPPR4	12.7643	1.24785	0.441116	2.82886	0.00467149	0.682634	FALSE
AGO1	4070.82	0.712167	0.254787	2.79515	0.00518755	0.684882	FALSE
CFAP58-AS1	4.38855	1.2548	0.447685	2.80285	0.00506526	0.684882	FALSE
CLCN7	1529.45	-0.528623	0.189043	-2.79632	0.00516882	0.684882	FALSE
E4F1	903.612	-0.624785	0.223172	-2.79957	0.00511708	0.684882	FALSE
GPR83	10.8072	1.18258	0.420387	2.81308	0.00490691	0.684882	FALSE
HEXA	1623.48	-0.621281	0.222415	-2.79335	0.00521656	0.684882	FALSE
LPP	2492.78	0.863054	0.309197	2.79128	0.00525002	0.684882	FALSE
MTMR9LP	567.41	-0.657505	0.235372	-2.79347	0.00521457	0.684882	FALSE
NCOR1	4268.45	0.674627	0.240099	2.80979	0.00495738	0.684882	FALSE
PCAT7	194.572	0.90812	0.324636	2.79735	0.00515243	0.684882	FALSE
PIH1D3	3.81056	-1.3123	0.467377	-2.8078	0.00498811	0.684882	FALSE
POLR2A	6725.29	0.680204	0.241926	2.81163	0.00492918	0.684882	FALSE
POM121C	786.667	0.689714	0.244638	2.81932	0.00481249	0.684882	FALSE
PRKRIP1	1214.5	-0.495233	0.176077	-2.81259	0.00491436	0.684882	FALSE
PRR29	383.482	-0.976589	0.347806	-2.80786	0.00498722	0.684882	FALSE
REG4	16.4847	-1.12831	0.401975	-2.80692	0.0050018	0.684882	FALSE
RN7SL2	1137.4	1.28356	0.458181	2.80142	0.00508777	0.684882	FALSE
RP3-423B22.5	3.14037	-1.29597	0.464248	-2.79155	0.00524566	0.684882	FALSE
SEPT3	1502.72	0.698734	0.249584	2.7996	0.00511664	0.684882	FALSE
SLC35F1	204.301	0.894993	0.31819	2.81276	0.00491184	0.684882	FALSE
SPTBN5	242.503	-0.797344	0.284213	-2.80544	0.00502473	0.684882	FALSE
STXBP1	1031.78	0.969983	0.343322	2.82529	0.00472384	0.684882	FALSE
TEPSIN	679.317	-0.650667	0.230356	-2.82461	0.0047338	0.684882	FALSE
TMEM131	2309.6	0.73209	0.259348	2.82281	0.0047605	0.684882	FALSE
TRMU	1308.92	-0.66894	0.238669	-2.80279	0.00506626	0.684882	FALSE
VSIG8	10.1676	-1.26242	0.448843	-2.8126	0.00491424	0.684882	FALSE
XKR7	342.287	0.970413	0.346415	2.8013	0.00508967	0.684882	FALSE
ZNF124	248.03	0.800303	0.285976	2.7985	0.00513407	0.684882	FALSE
ZNF398	579.625	0.535414	0.191762	2.79208	0.00523699	0.684882	FALSE
ZNF573	83.6648	1.20311	0.426623	2.82008	0.0048011	0.684882	FALSE
ZNF620	377.839	0.886626	0.314001	2.82364	0.0047482	0.684882	FALSE
PITRM1-AS1	5.91359	1.18372	0.425128	2.78439	0.00536279	0.685365	FALSE
RP11-1I2.1	10.2332	-1.16541	0.418512	-2.78466	0.00535844	0.685365	FALSE
RP11-448G4.2	2.38357	-1.31158	0.470317	-2.78872	0.00529166	0.685365	FALSE
RP11-54O7.17	155.991	-1.1364	0.408062	-2.78486	0.00535501	0.685365	FALSE
TMEM192	454.463	0.662419	0.237882	2.78465	0.00535848	0.685365	FALSE
TMEM245	3198.82	0.802732	0.28812	2.78611	0.00533455	0.685365	FALSE
C20orf85	39.617	-1.25086	0.450945	-2.77386	0.00553955	0.687194	FALSE
CTD-2555O16.4	15.6233	1.00887	0.363218	2.7776	0.00547626	0.687194	FALSE
LRRC46	77.8729	-0.96531	0.347614	-2.77696	0.00548705	0.687194	FALSE
MAVS	3832.93	0.540609	0.195004	2.7723	0.00556616	0.687194	FALSE
RNF215	570.279	-0.746908	0.268449	-2.78231	0.00539732	0.687194	FALSE
RP11-128A17.2	9.62307	-1.15239	0.415761	-2.77176	0.00557547	0.687194	FALSE
TNFRSF25	670.256	-0.771962	0.278523	-2.77163	0.00557761	0.687194	FALSE
[truncated: 37,396 more rows]

## Sheet: S3F
gene_short_name	baseMean	log2FoldChange	lfcSE	stat	pvalue	padj	differentially_expressed
[truncated: 37,698 more rows]

[truncated: 5 more sheets: S3G, S3H, S3I, S3J, S3K]
