# Supplementary material for: A human ESC-based screen identifies a role for the translated lncRNA LINC00261 in pancreatic endocrine differentiation
Source: eLife. 2020 Aug 3;9:e58659. doi: 10.7554/eLife.58659 (PMC7423336; doi:10.7554/eLife.58659)
Supplement: Figure 3—source data 2. [file elife-58659-fig3-data2.xlsx]

## Sheet: Expression of Candidate lncRNAs
LINC00617	ES	DE	GT	PP1	PP2
fold change	1.21618	0.221989	0.870176	0.180596	0.932031
	0.867332	0.29432	0.77145	0.167933	0.445012
	0.948022	0.467595	1.15977	0.0805456	0.0648073
geometric mean	1	0.312613	0.919945	0.134678	0.299554
+error	0.106464	0.0758216	0.11826	0.0396208	0.363546
-error	0.09622	0.0610214	0.104789	0.0306143	0.164231
RP11-445F12.1	ES	DE	GT	PP1	PP2
fold change	0.711268	112.691	5.89365	0.960182	1.01971
	0.527862	84.5611	5.8662	1.09626	0.0807306
	3.23789	155.055	4.69045	0.509813	0.599536
	0.822591
geometric mean	1	113.898	5.45321	0.812629	0.366812
+error	0.495375	21.797	0.426774	0.216542	0.427191
-error	0.331271	18.2957	0.395799	0.17098	0.197353
GATA6-AS1	ES	DE	GT	PP1	PP2
fold change	0.943501	5585.37	115.525	1126.1	811.975
	2.58962	4638.53	154.691	2864.92	537.268
	1.15326	3938.76	133.681	1796.16	660.491
	1.19309	3700.35	5.10363	15.8376	3.91005
	0.35781	6268.75	365.746	9.80145	2.626
	0.831319		151.137	563.634	493.427
geometric mean	1	4729.8	89.7828	282.381	106.508
+error	0.29881	498.9	74.5997	495.147	217.129
-error	0.230065	451.297	40.745	179.826	71.4567
LINC00261	ES	DE	GT	PP1	PP2
fold change	0.326728	948.921	3377.04	6482.33	4445.5
	0.340057	1222.28	1960.63	2711.45	6168.18
	0.223193	2141.87	8525.57	13173.4	11008.3
	3.72125	2585.63	8317.83	11450.3	6832.09
	3.47864	1560.44	11130.7	8404	5410.01
	3.11519
geometric mean	1	1585.63	5541.63	7406.05	6449.26
+error	0.741691	316.157	2157.11	2390.39	1056.77
-error	0.425845	263.599	1552.71	1807.12	907.991
LINC00479	ES	DE	GT	PP1	PP2
fold change	1.1897	187.745	111.879	334.166	191.073
	0.924266	201.431	204.748	566.103	99.6204
	1.35482	194.468	224.516	295.808	109.452
	0.912794	240.272	224.436	534.314	149.236
	0.735379	363.506	253.621	300.028	175.615
	0.997877	591.517
		269.125
geometric mean	1	269.125	196.471	389.552	140.424
+error	0.0917967	55.1518	30.6174	59.7335	19.2014
-error	0.0840786	45.7718	26.4894	51.7918	16.8916
DIGIT	ES	DE	GT	PP1	PP2
fold change	1.1311	2045.12	20.9277	1.33299	1.28852
	0.501141	2325.96	4.12381	1.64172	1.77591
	1.76417	2789.11	1.61332	0.916965	5.22487
		1153.62	0.933848	1.17441	0.565836
		2379.99	11.7489
		3072.29	4.33314
		2084.89
geometric mean	1	2179.12	4.33314	1.23901	1.61276
+error	0.445558	277.008	3.43295	0.160483	0.941802
-error	0.308226	245.766	1.91544	0.14208	0.594583
RP11-834C11.4	ES	DE	GT	PP1	PP2
fold change	0.979172	1.20687	7.66971	602.142	837.247
	1.50033	1.00609	11.3607	4385.91	1097.28
	0.873672	1.18428	9.22581	1058.68	422.838
	0.929829	0.867277	11.161	275.718	255.808
	0.938369	0.807047	10.1925	759.114	96.9232
	0.892953
geometric mean	1	1.0013	9.82278	898.379	395.128
+error	0.0862692	0.0841463	0.734442	516.39	215.016
-error	0.0794179	0.077623	0.683349	327.908	139.244
RP11-834C11.4	ES	DE	GT	PP1	PP2
fold change	1.4704	0.14073	0.00864738	16.7983	185.513
	0.814008	0.110395	0.00421937	17.7218	323.277
	1.84752	0.00805001	0.0290038	9.22599	584.614
	0.333085	0.373291		32.506	367.962
	0.873599	0.0289799		1.06958	46.3329
	1.5541
geometric mean	1	0.067028	0.0101905	9.90815	226.622
+error	0.293678	0.0637903	0.00769464	7.98637	124.198
-error	0.22701	0.0326845	0.00438421	4.42203	80.2291
SOX9-AS1	ES	DE	GT	PP1	PP2
fold change	1.51084	0.379315	1.36425	637.038	697.968
	2.17317	0.258159	2.52938	635.779	369.576
	1.5614	0.0802332	1.13142	234.868	180.277
	1.15928	0.212338	0.0403445	693.341	397.093
	0.468376	0.0289778	0.937159	15.8178	80.2757
	0.359244
geometric mean	1	0.137046	0.682065	253.325	271.763
+error	0.343564	0.0811983	0.728088	267.856	122.887
-error	0.255711	0.0509883	0.352163	130.194	84.6221
LHFPL3-AS2	ES	DE	GT	PP1	PP2
fold change	2.47194	17.6118	39.0149	700.086	6120.29
	1.01485	3.31928	124.929	4563.55	4580.96
	1.07002	2.63393	196.102	3446.27	8613.71
	0.688575	18.7677	510.535	1919.52	5458.84
	1.21915	19.4965	159.693	607.114	6262.51
	0.443772
geometric mean	1	8.91588	150.778	1665.92	6072.31
+error	0.265414	5.10011	168.856	840.099	661.787
-error	0.209745	3.24429	79.653	558.47	596.75
