# Supplementary material for: A human ESC-based screen identifies a role for the translated lncRNA LINC00261 in pancreatic endocrine differentiation
Source: eLife. 2020 Aug 3;9:e58659. doi: 10.7554/eLife.58659 (PMC7423336; doi:10.7554/eLife.58659)
Supplement: Figure 3—source data 3. [file elife-58659-fig3-data3.xlsx]

## Sheet: Endoderm Gene Expression
	CER		CXCR4		EOMES		FOXA2		GATA6		SOX17
GATA6-AS1 KO	control	KO	control	KO	control	KO	control	KO	control	KO	control	KO
fold change	0.77747	0.551026	1.28	1.18736	0.494074	2.10351	0.992463	0.88376	0.851223	0.585446	2.09212	3.0139
	1.12002	1.01175	1	1.42184	1.69678	1.67729	1.49895	1.35719	1.79952	2.14991	1.05091	1.05822
	1.14602	0.951898	1.01	1.59596	0.963349	1.03488	1.43457	1.10493	1.53788	3.25865	0.552853	0.716133
	1.00207	1.19736	0.94	1.04326	0.77171	0.907182	1.02381	0.419598	2.31489	2.37997	1.51808	0.595277
		0.807021	0.74	1.00241	0.82519	1.05567	1.04668	0.969461	1.60319	4.66672	0.437348	0.510007
		1.1912	0.83	1.20595	1.12724	0.967828	0.384987	1.94866	1.11077	2.20656	1.1595	1.05115
			1.14	1.45644	1.17414	2.99003	1.02713	3.62383	3.27635	1.03177	1.06867	1.86035
			1.18	1.33312	0.815679	2.00594	1.10579	1.09391	1.28646	0.872804		2.99448
				1.20187	1.91132	0.932336		1.03792	0.0244317			1.0618
				2.50227	0.942329	1.39705						1.40022
geometric mean	1	0.921133	1	1.34821	1	1.38747	1	1.17662	1	1.75628	1	1.19696
+error	0.0929449	0.116615	0.0670505	0.116203	0.132173	0.195477	0.15896	0.253851	0.61971	0.247946	0.228814	0.2584
-error	0.0850408	0.10351	0.0628372	0.106982	0.116743	0.171338	0.137158	0.208803	0.382606	0.193093	0.186207	0.212521
	CER		CXCR4		EOMES		FOXA2		GATA6		SOX17
RP11-445F12.1 KO	control	KO	control	KO	control	KO	control	KO	control	KO	control	KO
fold change	0.992148	1.24631	1.33509	1.12684	1.45887	1.31899	2.11354	1.54128	0.542201	0.890924	1.52432	1.41389
	1.33723	1.23229	0.912096	0.843293	0.719119	0.768152	0.553419	0.787198	1.29748	0.992657	0.617132	0.545074
	0.650542	1.30009	0.821197	0.733796	0.953198	1.13871	0.854941	0.920442	1.42148	1.48571	1.06303	1.0286
	1.15862	1.30189		1.13232		1.04914		0.850057		1.29082		0.848185
				0.834436		0.858218		0.527685		0.987569		0.555503
				0.762082		0.864779		0.783925		0.945302		0.439965
geometric mean	1	1.26976	1	0.891518	1	0.982289	1	0.855742	1	1.0796	1	0.740091
+error	0.168518	0.0181856	0.159101	0.0722205	0.228271	0.085287	0.483913	0.129992	0.359601	0.0926615	0.300578	0.147618
-error	0.144215	0.0179289	0.137263	0.0668085	0.185848	0.0784735	0.326106	0.112849	0.26449	0.0853371	0.231111	0.123071
	CER		CXCR4		EOMES		FOXA2		GATA6		SOX17
LINC00261 KO	control	KO	control	KO	control	KO	control	KO	control	KO	control	KO
fold change	1.06726	1.15525	0.955786	1.45377	1.14447	1.49419	0.892043	1.07951	1.04592	0.528717	1.34981	1.27044
	1.52209	0.994167	0.708213	0.806108	0.764041	0.8504	1.06434	0.698627	1.19481	0.679954	0.76756	1.09501
	0.942342	1.18766	1.50531	0.966663	0.992423	1.37458	0.509587	0.717913	1.21967	1.09816	0.678484	1.24323
	1.15724	1.40445	1.31912	0.817924	1.33267	1.24669	2.28408	0.565498	0.460489	1.0625	1.4203	1.22642
	0.562982	0.814613	0.901183	1.10804	0.65691	1.50139	0.598076	0.943817	1.10194	1.71706	0.57502	1.43017
	1.00268	1.17494	0.811371	0.538007	0.870739	1.8208	0.923929	1.18165	1.20725	1.11401	0.990494	1.5148
		0.999313	1.0175	1.18405	1.51171	1.33166	1.63761	1.0125	1.07099	1.13009	1.75857	1.42005
		1.00878		0.59535		1.66534		0.833431		1.08561		1.46715
		1.05992		0.860691		1.04196		0.995091		1.1402		1.08856
		0.73725		0.567265		1.85909		0.632079		1.46406		1.97862
		0.965211		0.552306		0.895778		0.759759		0.766244		1.04976
		1.25103		0.665183		0.953268		0.501742		1.45925		0.692713
		1.11913		1.17511		1.0067		1.00101		1.70163		0.740449
		1.34213		0.963539		1.46617		1.06871		1.08997		1.36162
				0.807142		1.86921				1.22232		1.93923
geometric mean	1	1.07121	1	0.832404	1	1.3142	1	0.83022	1	1.09979	1	1.25259
+error	0.142958	0.0523697	0.105156	0.069527	0.12003	0.0949716	0.220487	0.0610088	0.140311	0.0957646	0.172046	0.0982897
-error	0.125077	0.0499288	0.0951502	0.0641674	0.107166	0.088571	0.180655	0.0568325	0.123046	0.0880938	0.146791	0.0911381
	CER		CXCR4		EOMES		FOXA2		GATA6		SOX17		DIGIT		GSC
DIGIT KO	control	KO	control	KO	control	KO	control	KO	control	KO	control	KO	control	KO	control	KO
fold change	0.382757	0.547673	0.391446	0.692401	0.62147	0.820091	0.81522	1.93652	0.977391	0.953556	0.851536	0.146626	0.510132	0.00082421	0.992918	1.16373
	0.593091	2.32827	0.336913	0.426031	0.64189	0.787307	2.0007	1.21899	0.989265	1.10503	1.16091	0.198612	0.710613	0.00099012	1.45288	1.12876
	2.16587	2.80519	1.71234	1.3097	0.71393	0.723218	1.06577	0.384937	0.860729	1.13528	0.737777	1.05779	0.935106	5.7281e-05	0.588782	1.5777
	2.1365	2.23007	1.19506	1.72079	0.774201	0.657711	1.17019	0.76416	2.54155	1.00502	0.680505	0.850973	1.29081	0.00252027	0.598887	0.822036
	1.64024	2.39506	1.71229	2.20606	1.41981	1.29473	1.76497	1.72606	0.447877	0.397748	1.17455	0.874233	1.86185	0.00070947	1.97715	2.24735
	2.12077	0.696884	1.66497	2.28812	1.14118	1.07886	1.48514	1.5822	0.4618	0.497348	1.00502	0.7398	1.66534	0.00061639	1.46853	2.19423
	0.696884	1.86649	1.23278	0.561404	0.940445	1.06912	1.05306	0.780073	0.698528	1.13566	0.960172	0.5146	1.19187	0.00084035	1.49025	0.49026
	0.231171	2.45442	0.363854	1.71789	1.59052	1.0046	1.38475	0.93595	0.484167	0.592348	1.4316	0.445406	0.618421	0.00030359	0.818486	1.43577
	2.46428	2.94528	1.98855	3.22313	0.843355	1.44928	0.492793	0.960655	1.01679	0.9912	1.24172	6.10614			0.877546	1.47527
	0.68934		1.45712	2.48646	2.21894	1.22643	0.260993	0.853055	1.2867	3.53695		3.93017			0.632546	1.00204
									1.73125	0.985901
									2.98395	2.04095
										3.92442
geometric mean	1	1.78029	1	1.38482	1	0.980228	1	1.01271	1	1.12129	1	0.788801	1	0.00058189	1	1.24211
+error	0.305771	0.359557	0.254093	0.303021	0.143844	0.0770243	0.216078	0.165391	0.199065	0.220806	0.0861682	0.349654	0.157906	0.00023904	0.148321	0.192993
-error	0.234169	0.299141	0.202611	0.248619	0.125755	0.0714129	0.177684	0.142172	0.166017	0.184478	0.0793323	0.242264	0.136372	0.00016944	0.129163	0.167039
