# Supplementary material for: A human ESC-based screen identifies a role for the translated lncRNA LINC00261 in pancreatic endocrine differentiation
Source: eLife. 2020 Aug 3;9:e58659. doi: 10.7554/eLife.58659 (PMC7423336; doi:10.7554/eLife.58659)
Supplement: Figure 3—source data 4. [file elife-58659-fig3-data4.xlsx]

## Sheet: Sheet1
	LINC00617		RP11-445F12.1		GATA6-AS1		LINC00479		RP11-834C11.4		SOX9-AS1		MIR7-3HG		LHFPL3-AS2		LINC00261 clone 1		LINC00261 clone 2		LINC00261 clone 3		LINC00261 clone 4		sORF1/2		sORF3 clone 1		sORF3 clone 2		sORF4 clone 1		sORF4 clone 2		sORF5 clone 1		sORF5 clone 2		sORF6 clone 1		sORF6 clone 2		sORF7 clone 1		sORF7 clone 2
INS expression	control	KO	control	KO	control	KO	control	KO	control	KO	control	KO	control	KO	control	KO	control	KO	control	KO	control	KO	control	KO	control	FS	control	FS	control	FS	control	FS	control	FS	control	FS	control	FS	control	FS	control	FS	control	FS	control	FS
fold change	2.40736	0.35033	0.224115	0.106501	0.707835	1.83836	1.56407	5.10691	1.20492	3.83365	0.707835	3.05765	1.25654	1.02097	0.403735	0.960957	0.250614	0.239027	1.44203	0.276865	0.907454	0.388631	0.796935	0.150917	3.76427	2.9949	0.813606	1.62321	0.583617	0.521927	3.74746	1.14509	1.05895	0.23595	1.05895	0.506166	1.01706	0.469686	1.08102	0.175971	1.00779	1.64142	0.896491	0.592611	1.00779	0.634813
	2.79327	0.7462	1.23277	2.11333	1.06173	6.58228	2.08096	0.292992	2.16848	3.33622	1.06173	0.914383	2.8496	3.25041	0.605591	0.534319	1.37853	0.121111	1.00542	0.137793	0.996951	1.293	1.65822	0.234938	0.661573	0.744706	9.43891	10.5876	0.842537	0.71983	1.27244	0.75075	3.16676	0.0425422	3.16676	0.268158	3.0415	0.673726	1.72885	0.274781	3.01376	0.785897	2.68093	1.556	3.01376	0.649974
	0.925109	1.77955	2.75369	1.29464	1.33062	1.50763	1.16187	0.457348	2.09922	0.796884	1.33062	1.40442	4.34104	0.330138	0.758957	0.944515	3.07928	0.166255	0.503727	0.217058	1.06596	0.645934	0.756718	0.0969047	8.00923	8.63957	1.27266	4.40935	0.708772	0.527263	2.85454	1.01117	1.69355	0.273189	1.69355	2.0852	1.62656	3.62636	2.52409	1.96941	1.61172	0.963347	1.43373	0.82446	1.61172	0.298437
	0.96884	1.08787	1.31441	0.40993			0.264438	0.274346	0.57854	1.1673		0.254676	0.153843	2.66765	1.40802	0.310767	1.46983	0.179447	1.36926	0.241798	0.632699	0.997004			0.822758	1.16489	0.369929	0.431291	1.64212	1.46021	1.57295	1.93303	2.47256	2.12801	2.47256	1.60845	2.37475	1.46245	0.387483	1.29684	2.35309	0.712493	2.09322	1.21294	2.35309	1.02003
	0.99823	0.859631		1.80283					0.902982	0.547967			0.418185	4.27466	3.82735	0.897664	1.77911	0.106308			1.85712	0.259304			0.432082	0.338602	0.534047	0.494246	1.74731	2.41935	4.57769	0.261881	0.395241	0.0893539	0.395241	1.29385	0.364557	1.97295	0.389414	0.843357	0.376144	0.0684575	0.32294		0.376144	1.20815
	1.32813	1.07958		1.31681					0.358314	0.475487				5.18446		3.06871	0.359468	0.0389564			2.78406	0.230716			0.566915	0.488821	0.449259	0.28877			1.42473	0.0921915	0.379571	0.752988	0.379571	0.935634	0.366374		0.72392		0.361231	0.829901	0.461657		0.361231	0.175492
	0.741534	3.25332		2.68696					0.973988	2.86656				0.215079				0.356281			0.31699	1.03797			0.248487	0.411213	1.04087	0.600801			0.987719	0.224255	0.381462		0.381462		0.523748		0.857051		0.363031		0.600344		0.363031	0.68089
	0.168772	1.34624		0.238583						1.51495				0.199003				0.166781				0.230077			1.12038	0.952722	1.10754	1.17569			0.106198		0.545319		0.545319		0.681088		0.250567		0.51897		0.71075		0.51897
		0.789012								0.599286				0.140148								0.183366			0.893563	1.01375					0.0682726		0.709138		0.709138		0.806342		1.49078		0.674875		1.2363		0.674875
		0.244011								0.124728				0.0674699								0.369616											0.839551		0.839551		0.235742		1.18501		0.798987		0.982723		0.798987
		3.52057												0.375524																			0.245451		0.245451		1.40258		0.0526786		0.233592		1.8446		0.233592
		0.964158												0.130186																			1.46034		1.46034		1.11489		1.05946		1.38978		1.12658		1.38978
		1.71153												0.474644																			1.16081		1.16081		2.09269		1.92267		1.10472		0.0436862		1.10472
		1.77162												0.61074																			2.17887		2.17887		1.2781		3.52087		2.0736		0.878605		2.0736
		0.555984																															1.88341		1.33074		0.0495618		0.991355		1.26644		1.59447		1.26644
		0.0869044																															1.33074		0.051603		0.996773		2.95264		0.0491097		2.44862		0.0491097
																																	0.051603		1.03783		1.80891		1.56334		0.987681		2.18341		0.987681
																																	1.03783		1.88341		0.9327		3.08329		1.79241		1.29647		1.79241
																																	0.971113		0.971113		2.77794		0.959624		3.28234		2.55697		3.28234
																																	2.89235		2.89235		2.47707				0.924192		0.795814		0.924192
																																	2.57909		2.57909		1.47084				2.7526				2.7526
																																	1.53142		1.53142		2.90087				2.45448				2.45448
																																	3.02034		3.02034		0.902847				1.45743				1.45743
																																	0.94003		0.94003						2.8744				2.8744
geometric mean	1	0.903434	1	0.808062	1	2.63249	1	0.658249	1	1.00062	1	1.14285	1	0.56885	1	0.863714	1	0.14653	1	0.211534	1	0.417128	1	0.150896	1	1.04417	1	1.16073	1	0.9311	1	0.510998	1	0.566906	1	0.905465	1	1.27055	1	0.63611	1	0.979935	1	0.563909	1	1.06991
+error	0.355041	0.241092	0.700347	0.412566	0.202801	1.54503	0.582596	0.657121	0.218308	0.398746	0.202801	0.779215	0.849912	0.261017	0.479514	0.3152	0.49245	0.0381398	0.273845	0.034554	0.304901	0.100695	0.288289	0.0439621	0.432058	0.42584	0.430376	0.642178	0.249921	0.329817	0.643721	0.259711	0.230318	0.377957	0.216065	0.335042	0.221309	0.262214	0.261886	0.37088	0.233962	0.23207	0.214166	0.165084	0.214166	0.571272
-error	0.262015	0.190306	0.411885	0.273121	0.168607	0.973612	0.368127	0.328842	0.998831	0.285124	0.168607	0.463316	0.459434	0.17892	0.324102	0.230927	0.329961	0.0302628	0.214975	0.0297022	0.233658	0.0811138	0.223777	0.0340448	0.301704	0.302481	0.300883	0.41344	0.199949	0.243547	0.391624	0.172195	0.187202	0.22677	0.177676	0.244552	0.181206	0.207741	0.207536	0.234283	0.189602	0.187634	0.17639	0.1277	0.17639	0.37242
