# Supplementary material for: A human ESC-based screen identifies a role for the translated lncRNA LINC00261 in pancreatic endocrine differentiation
Source: eLife. 2020 Aug 3;9:e58659. doi: 10.7554/eLife.58659 (PMC7423336; doi:10.7554/eLife.58659)
Supplement: Figure 4—source data 1. — (A) Differentially expressed genes in LINC00261 knockout PP2 stage cells. (B) Sequences of LINC00261 wild type and frameshift mutants. (C) Differentially expressed genes in LINC00261-sORF3-frameshift PP2 stage cells. [file elife-58659-fig4-data1.xlsx]

## Sheet: Table info
Figure 4–Source data 1	Characterization of LINC00261 KO and LINC00261-sORF3-frameshift PP2 cells.
S4-1A	Differentially expressed genes in LINC00261 knockout PP2 stage cells.
S4-1B	Sequences of LINC00261 wild type and frameshift mutants
S4-1C	Differentially expressed genes in LINC00261 sORF3 frameshift PP2 stage cells

## Sheet: S4-1A
gene_short_name	baseMean	log2FoldChange	lfcSE	stat	pvalue	padj	differentially_expressed
LINC00261	13335	3.82355	0.19438	19.6705	3.85611e-86	8.6211e-82	TRUE
ATP12A	196.341	-1.54519	0.207787	-7.43643	1.03444e-13	1.15634e-09	TRUE
EDN3	13.6733	-2.33981	0.3891	-6.01339	1.8168e-09	1.35394e-05	TRUE
GRM3	81.9375	-1.71271	0.287404	-5.95926	2.53388e-09	1.41625e-05	TRUE
NR0B1	34.4766	1.45454	0.251467	5.78422	7.28515e-09	3.25748e-05	TRUE
ZAP70	86.8663	1.04032	0.182792	5.69127	1.26101e-08	4.69873e-05	TRUE
LPAR3	70.1093	-1.36863	0.249515	-5.48517	4.13072e-08	0.000124782	TRUE
MSC	114.279	1.96049	0.358316	5.47139	4.46507e-08	0.000124782	TRUE
FABP7	180.836	1.97201	0.362783	5.43579	5.4553e-08	0.000135516	TRUE
PLXNA4	32.7605	-1.79125	0.346255	-5.17321	2.30104e-07	0.000514445	TRUE
PLAU	1021.04	1.48741	0.289953	5.12985	2.89974e-07	0.000562614	TRUE
GUCA2B	29.8775	2.08994	0.41129	5.08142	3.74619e-07	0.000644258	TRUE
FRMD3	51.3032	-1.21797	0.243854	-4.99464	5.89454e-07	0.000787271	TRUE
MIR7-3HG	596.453	1.40425	0.28132	4.99166	5.98632e-07	0.000787271	TRUE
NEFL	196.817	1.55226	0.309345	5.01788	5.22443e-07	0.000787271	TRUE
RPS6KL1	58.6584	1.32743	0.265863	4.99291	5.94762e-07	0.000787271	TRUE
GOLGA7B	138.12	1.08927	0.218715	4.98032	6.34783e-07	0.000788436	TRUE
BMP3	367.615	-1.8	0.365793	-4.9208	8.6193e-07	0.000877098	TRUE
C22orf42	306.618	1.49084	0.301591	4.94325	7.68306e-07	0.000877098	TRUE
VSIG1	705.176	-1.58012	0.320031	-4.93739	7.91735e-07	0.000877098	TRUE
CLPS	111.505	1.65353	0.339728	4.8672	1.13192e-06	0.00101225	TRUE
A2M	189.862	2.01542	0.415131	4.85491	1.20442e-06	0.00102794	TRUE
ATP13A4	335.824	-1.43162	0.295246	-4.84891	1.24142e-06	0.00102794	TRUE
CTNNA2	76.4844	1.15865	0.239521	4.83736	1.31578e-06	0.00103465	TRUE
PDE2A	147.144	1.35868	0.281268	4.83056	1.36151e-06	0.00103465	TRUE
PLCH2	26.8027	1.54902	0.32093	4.82667	1.38835e-06	0.00103465	TRUE
UNC93A	43.1053	1.25912	0.262047	4.80494	1.54795e-06	0.00111637	TRUE
AREG	88.3694	1.88108	0.39222	4.79599	1.61877e-06	0.00113097	TRUE
AMIGO2	896.839	1.0114	0.212575	4.75787	1.95649e-06	0.00124975	TRUE
KCNK16	1773.04	1.3543	0.284534	4.75972	1.93862e-06	0.00124975	TRUE
LCP1	430.279	1.33536	0.280516	4.76037	1.93237e-06	0.00124975	TRUE
CTC-304I17.5	13.0779	1.56714	0.330708	4.73872	2.15069e-06	0.00133564	TRUE
C11orf21	18.5612	1.55854	0.330909	4.70986	2.47881e-06	0.00149781	TRUE
SHH	370.196	-1.24526	0.265072	-4.69781	2.62966e-06	0.00154714	TRUE
CDH7	2049.11	-1.11774	0.238255	-4.69136	2.71398e-06	0.00155581	TRUE
MDGA2	160.011	-1.62712	0.348475	-4.66925	3.02307e-06	0.00168967	TRUE
CRYBA2	1314.99	1.51683	0.32545	4.66071	3.15122e-06	0.00171834	TRUE
CDH5	60.146	1.62991	0.350135	4.6551	3.23823e-06	0.00172374	TRUE
RP11-788H18.1	19.6996	1.93405	0.419999	4.60488	4.12694e-06	0.00214572	TRUE
KIRREL3	121.493	1.51655	0.331098	4.58038	4.64138e-06	0.00225617	TRUE
SEMA3C	2956.65	-1.6073	0.350587	-4.5846	4.54848e-06	0.00225617	TRUE
LAPTM5	49.4716	1.70648	0.375263	4.54743	5.43042e-06	0.00252933	TRUE
MYL7	172.536	1.37303	0.301691	4.55113	5.33597e-06	0.00252933	TRUE
NPPB	1770.92	1.31621	0.28987	4.54069	5.60709e-06	0.00255832	TRUE
PTGER2	54.999	1.38927	0.306441	4.53357	5.79958e-06	0.00259322	TRUE
CELA3A	133.193	1.30881	0.289318	4.52377	6.07465e-06	0.00266296	TRUE
APOC3	369.793	1.87023	0.417711	4.47732	7.55854e-06	0.00318842	TRUE
GPD1	282.896	1.47425	0.329212	4.47811	7.53066e-06	0.00318842	TRUE
ASIC4	131.873	1.44054	0.324883	4.43402	9.24905e-06	0.00366779	TRUE
NMRK2	132.991	1.572	0.35472	4.43166	9.35118e-06	0.00366779	TRUE
TM4SF1	498.263	1.43346	0.323361	4.43301	9.29268e-06	0.00366779	TRUE
INS	1423.3	1.77786	0.40422	4.39824	1.09131e-05	0.00401631	TRUE
STAT5A	42.1819	1.11408	0.253556	4.39381	1.11379e-05	0.00401631	TRUE
CAMKV	101.72	1.66013	0.378825	4.38232	1.1742e-05	0.00416692	TRUE
GDAP1L1	141.945	1.54393	0.352691	4.37757	1.20009e-05	0.00419224	TRUE
AIF1	171.737	1.51737	0.347345	4.3685	1.25105e-05	0.00430302	TRUE
PGM5	101.99	1.37176	0.31478	4.35784	1.31354e-05	0.00444953	TRUE
KLHDC8A	30.5398	1.45449	0.335767	4.33183	1.47875e-05	0.00452882	TRUE
LINC01338	7.51285	1.6701	0.385133	4.33642	1.44822e-05	0.00452882	TRUE
MAGEA4	8.18386	1.97193	0.453846	4.34494	1.39313e-05	0.00452882	TRUE
NLRP1	1315.67	1.16239	0.267316	4.34838	1.37146e-05	0.00452882	TRUE
SERPINA1	33933.5	-1.20283	0.277129	-4.34032	1.42278e-05	0.00452882	TRUE
SPNS2	126.457	1.3521	0.312037	4.33315	1.46992e-05	0.00452882	TRUE
ASB2	35.2054	1.65006	0.381223	4.32835	1.5023e-05	0.00453877	TRUE
BCL6B	25.725	1.69008	0.39108	4.32157	1.5492e-05	0.00461434	TRUE
C6	29.3563	1.39526	0.323066	4.31883	1.56859e-05	0.00461434	TRUE
MCHR1	30.4518	1.48438	0.345183	4.30027	1.70587e-05	0.00495299	TRUE
RP11-469N6.1	7.15368	1.68579	0.392485	4.29518	1.74555e-05	0.00500324	TRUE
RP11-150O12.3	24.4645	1.42401	0.331963	4.28966	1.78943e-05	0.00506409	TRUE
PRKAG2-AS1	72.1239	1.20752	0.28179	4.28519	1.82582e-05	0.00510248	TRUE
C15orf59	126.475	1.17634	0.276202	4.25897	2.05371e-05	0.00559045	TRUE
PECAM1	44.5378	1.93247	0.45398	4.25672	2.07446e-05	0.00559045	TRUE
SH3TC1	143.679	1.15384	0.27107	4.25662	2.07545e-05	0.00559045	TRUE
PPP1R14C	125.422	1.31994	0.310977	4.24451	2.19074e-05	0.005786	TRUE
RUNDC3A	554.556	1.26964	0.299629	4.23738	2.26141e-05	0.00587889	TRUE
ACKR1	53.4428	1.29016	0.305531	4.22269	2.41402e-05	0.00599338	TRUE
RAB26	1462.37	1.22787	0.290826	4.22202	2.42122e-05	0.00599338	TRUE
TSPAN1	274.537	1.23766	0.293232	4.22077	2.43474e-05	0.00599338	TRUE
SCGN	2844.25	1.25709	0.298756	4.20774	2.5794e-05	0.00623672	TRUE
TIE1	141.225	1.02275	0.243138	4.20643	2.59433e-05	0.00623672	TRUE
BCAS1	23.2302	-1.27108	0.303658	-4.18588	2.84057e-05	0.00631695	TRUE
DUSP26	106.319	1.27186	0.304586	4.17571	2.97056e-05	0.00631695	TRUE
IL16	9.80591	1.79294	0.427847	4.19062	2.78199e-05	0.00631695	TRUE
NPNT	356.795	-1.03002	0.245597	-4.19394	2.74147e-05	0.00631695	TRUE
PDZD3	87.1832	1.09354	0.262399	4.16749	3.07978e-05	0.00631695	TRUE
SNCG	61.6919	1.59406	0.382411	4.16846	3.0667e-05	0.00631695	TRUE
SSUH2	34.4622	1.0945	0.261594	4.18397	2.86465e-05	0.00631695	TRUE
TMEM190	62.4043	1.52578	0.365348	4.17623	2.96383e-05	0.00631695	TRUE
XPNPEP2	10.1633	1.61051	0.386173	4.17043	3.04031e-05	0.00631695	TRUE
CPM	926.337	-1.06943	0.256877	-4.16321	3.13808e-05	0.00637801	TRUE
EXOC3L1	6.18538	1.92389	0.462387	4.16078	3.17168e-05	0.00638821	TRUE
FAM92B	33.6862	1.37237	0.330133	4.15704	3.22397e-05	0.00643555	TRUE
DDC	1272.74	1.09821	0.264798	4.14734	3.36361e-05	0.00665489	TRUE
SYBU	270.891	-1.03456	0.250937	-4.12279	3.74317e-05	0.00715264	TRUE
AGT	577.1	1.28162	0.312415	4.1023	4.09056e-05	0.00775023	TRUE
ANKRD36BP2	14.5065	1.81785	0.443453	4.09931	4.14385e-05	0.00778522	TRUE
LYPD1	1357.19	-1.02803	0.251487	-4.08779	4.35494e-05	0.00804656	TRUE
DBH-AS1	53.843	1.03468	0.253673	4.0788	4.52685e-05	0.00809655	TRUE
ITIH1	40.3581	1.78016	0.436196	4.0811	4.48238e-05	0.00809655	TRUE
MAP3K7CL	9.50365	1.83725	0.450365	4.07947	4.51381e-05	0.00809655	TRUE
SST	6343.63	1.53242	0.375665	4.07923	4.5186e-05	0.00809655	TRUE
MRC1	30.401	1.39126	0.341679	4.07184	4.66432e-05	0.00824945	TRUE
TUBA4A	472.466	1.28617	0.316097	4.06893	4.72304e-05	0.00824945	TRUE
DUSP13	22.0457	1.4001	0.345086	4.05723	4.96578e-05	0.00854	TRUE
AGXT	52.445	1.11111	0.274875	4.04226	5.29394e-05	0.00883259	TRUE
EXOC3L2	13.8757	1.70107	0.420733	4.0431	5.27497e-05	0.00883259	TRUE
ACVRL1	25.5993	1.38257	0.342547	4.03615	5.4336e-05	0.00894327	TRUE
PIK3R5	48.3813	1.17441	0.292328	4.01743	5.88372e-05	0.00960162	TRUE
HSPA2	133.732	0.917602	0.179142	5.12221	3.0198e-07	0.000562614	FALSE
AGFG2	321.787	0.887199	0.180625	4.91183	9.02324e-07	0.000877098	FALSE
OGDHL	191.249	0.942692	0.191704	4.91744	8.76839e-07	0.000877098	FALSE
PLEKHA5	2847.52	-0.825782	0.169001	-4.88625	1.02775e-06	0.000957394	FALSE
SOX21-AS1	419.502	-0.934689	0.204065	-4.58034	4.64212e-06	0.00225617	FALSE
MAPK10	565.975	-0.626482	0.1409	-4.44627	8.73732e-06	0.00361741	FALSE
ADCY2	377.005	0.699916	0.15928	4.39424	1.11159e-05	0.00401631	FALSE
ENOX1	270.214	-0.597317	0.135879	-4.39593	1.10299e-05	0.00401631	FALSE
STAMBPL1	45.047	0.909835	0.207024	4.39483	1.10861e-05	0.00401631	FALSE
CADM3	926.309	0.768214	0.17684	4.34412	1.39833e-05	0.00452882	FALSE
ARHGEF4	135.077	0.775959	0.182855	4.24358	2.1998e-05	0.005786	FALSE
C2orf54	499.459	0.967737	0.228538	4.23447	2.29091e-05	0.00588712	FALSE
PTPRH	435.089	0.705273	0.167113	4.22033	2.43949e-05	0.00599338	FALSE
HAP1	849.517	0.934945	0.222808	4.1962	2.71432e-05	0.00631695	FALSE
MMP24	485.398	0.961773	0.23068	4.16929	3.05555e-05	0.00631695	FALSE
NPL	104.274	-0.753082	0.180139	-4.18057	2.90779e-05	0.00631695	FALSE
PDCD4	3121.92	-0.562081	0.134289	-4.18562	2.8439e-05	0.00631695	FALSE
PITPNC1	1367.5	-0.601859	0.144058	-4.17789	2.94227e-05	0.00631695	FALSE
TSPAN6	6086.76	-0.497408	0.118651	-4.1922	2.7626e-05	0.00631695	FALSE
UPB1	87.5803	0.914261	0.219151	4.17183	3.02157e-05	0.00631695	FALSE
CPVL	3020.87	-0.693783	0.167586	-4.13986	3.47524e-05	0.00681543	FALSE
LDLRAP1	594.827	0.745204	0.180472	4.1292	3.64029e-05	0.00707705	FALSE
PDGFD	865.231	-0.968542	0.234769	-4.12551	3.69911e-05	0.0071294	FALSE
ZNF14	282.03	-0.459585	0.11242	-4.08809	4.34932e-05	0.00804656	FALSE
ST6GALNAC3	352.3	-0.638975	0.156994	-4.07005	4.70026e-05	0.00824945	FALSE
CHST11	1063.84	-0.743665	0.183206	-4.05919	4.92441e-05	0.00853449	FALSE
NPC1L1	313.706	0.727854	0.179542	4.05394	5.03617e-05	0.00859494	FALSE
HNMT	224.581	-0.815924	0.201731	-4.04461	5.24094e-05	0.00883259	FALSE
SSTR3	245.957	0.899054	0.222766	4.03586	5.44029e-05	0.00894327	FALSE
GUCY2C	61.1147	1.31782	0.32981	3.99569	6.45061e-05	0.0103091	FALSE
MLX	809.484	0.320299	0.0801109	3.99819	6.38275e-05	0.0103091	FALSE
TRPV2	55.0708	1.40859	0.352544	3.99551	6.45557e-05	0.0103091	FALSE
DEPTOR	959.117	-0.838174	0.210155	-3.98836	6.65319e-05	0.010475	FALSE
RASGRP2	24.835	1.25359	0.314236	3.98933	6.62592e-05	0.010475	FALSE
ARHGEF28	97.4758	1.08128	0.271804	3.97816	6.94508e-05	0.0108581	FALSE
TMEM35A	193.751	-0.724434	0.182207	-3.97589	7.01171e-05	0.0108862	FALSE
SREBF1	1048.29	0.701762	0.176803	3.96919	7.2118e-05	0.0111196	FALSE
LRRTM1	433.874	0.764961	0.19321	3.95922	7.51944e-05	0.0115145	FALSE
TIMP3	751.729	0.751578	0.19021	3.9513	7.77283e-05	0.0118216	FALSE
MYC	218.697	1.17062	0.296389	3.94961	7.82801e-05	0.0118251	FALSE
LGALS1	30.293	1.55552	0.394487	3.94314	8.04226e-05	0.0120672	FALSE
FEZ1	225.979	1.29258	0.32904	3.92833	8.55391e-05	0.0123381	FALSE
ME3	399.484	0.97778	0.248627	3.93272	8.39889e-05	0.0123381	FALSE
MFNG	167.584	1.00661	0.256179	3.92931	8.51889e-05	0.0123381	FALSE
MYOCD	424.263	-1.124	0.285724	-3.93388	8.35872e-05	0.0123381	FALSE
S100A1	53.7679	1.35853	0.345617	3.93075	8.46796e-05	0.0123381	FALSE
WNT7A	19.3326	1.66169	0.422294	3.93491	8.32264e-05	0.0123381	FALSE
ANKRD65	328.623	0.978907	0.249848	3.91801	8.92827e-05	0.0127955	FALSE
MMRN2	24.1436	1.61517	0.412668	3.91396	9.07949e-05	0.0129293	FALSE
ASS1	166.18	1.17634	0.30089	3.90954	9.24709e-05	0.0130846	FALSE
PDE8B	465.181	-1.01895	0.260742	-3.90789	9.31044e-05	0.0130914	FALSE
S100A3	36.7632	1.48945	0.381332	3.9059	9.38744e-05	0.0131172	FALSE
BMPR1B	437.322	-0.834803	0.214134	-3.89851	9.67869e-05	0.0133572	FALSE
CGREF1	59.6547	1.04726	0.268528	3.9	9.61933e-05	0.0133572	FALSE
KCNK17	1101.66	1.12259	0.288066	3.89699	9.73958e-05	0.0133588	FALSE
RP11-862G15.2	16.0338	1.36555	0.351503	3.88488	0.000102379	0.0139566	FALSE
TH	28.0839	1.56406	0.40276	3.88335	0.000103028	0.0139599	FALSE
RASD1	519.465	1.00472	0.259571	3.87071	0.000108521	0.0146156	FALSE
ETV4	597.06	0.827928	0.214194	3.86531	0.000110947	0.0147695	FALSE
GS1-72M22.1	52.4501	1.10772	0.286801	3.86234	0.000112305	0.0147695	FALSE
TAGLN	12847.7	1.16769	0.302237	3.86351	0.000111771	0.0147695	FALSE
TSPO	31.5621	1.68639	0.436391	3.8644	0.000111363	0.0147695	FALSE
CD22	10.4388	1.75159	0.453728	3.86043	0.000113189	0.0147986	FALSE
CYP39A1	120.738	-0.78693	0.20397	-3.85806	0.00011429	0.0148556	FALSE
ADGRB1	64.1014	1.20256	0.311838	3.85635	0.000115094	0.0148738	FALSE
C8G	41.6795	1.26802	0.330259	3.83946	0.000123303	0.015636	FALSE
DCLK3	18.2258	1.05638	0.275207	3.8385	0.00012379	0.015636	FALSE
DHRS2	55.3893	1.27888	0.332979	3.84071	0.000122678	0.015636	FALSE
PELI3	641.273	1.0139	0.263854	3.84265	0.000121711	0.015636	FALSE
LHFPL4	72.9436	1.36178	0.355045	3.83552	0.000125297	0.0156495	FALSE
TRPM5	48.251	1.11661	0.291065	3.83628	0.000124914	0.0156495	FALSE
BATF2	27.2349	1.53203	0.399655	3.83337	0.000126399	0.0156994	FALSE
JAKMIP1	56.0997	1.11435	0.291032	3.82894	0.000128696	0.0158964	FALSE
PGAM2	63.6892	1.55823	0.407456	3.82427	0.000131158	0.0161115	FALSE
SEL1L3	2214.23	-0.746784	0.195653	-3.81689	0.000135144	0.0165105	FALSE
C8orf34	157.007	-1.08243	0.28401	-3.81123	0.000138275	0.0168011	FALSE
CELA3B	59.3051	1.17188	0.307607	3.80966	0.000139161	0.0168174	FALSE
BMP6	99.9634	-0.90919	0.239549	-3.79543	0.000147386	0.0177157	FALSE
PAX4	756.058	1.04649	0.275933	3.79254	0.000149115	0.0178276	FALSE
FLNC	2487.7	0.806796	0.212925	3.7891	0.000151192	0.0178647	FALSE
IRX2	607.79	1.14348	0.301701	3.79011	0.000150579	0.0178647	FALSE
PTPN13	7242.32	-1.13955	0.300825	-3.78807	0.000151823	0.0178647	FALSE
CDH13	66.9398	0.938253	0.24829	3.77886	0.000157548	0.0184414	FALSE
FGF18	54.9522	1.17017	0.310493	3.76874	0.000164075	0.0190063	FALSE
UGDH	7413.78	-0.826973	0.219428	-3.76876	0.000164059	0.0190063	FALSE
FOSB	82.9758	-1.75425	0.466082	-3.76382	0.000167337	0.0191854	FALSE
GRAP2	42.6103	1.11407	0.295977	3.76404	0.000167193	0.0191854	FALSE
CARTPT	36.4968	1.39615	0.371469	3.75846	0.000170964	0.0193043	FALSE
EPHA7	342.46	-1.26619	0.336703	-3.76056	0.00016953	0.0193043	FALSE
SNCA	204.749	0.750269	0.199562	3.75957	0.000170205	0.0193043	FALSE
DNAJB5	854.908	0.597514	0.159345	3.74981	0.00017697	0.0197826	FALSE
OR7E47P	17.9312	1.3806	0.368139	3.75021	0.000176689	0.0197826	FALSE
INA	640.496	0.953705	0.254667	3.7449	0.000180463	0.0200727	FALSE
SLC2A12	616.112	-0.853919	0.228221	-3.74163	0.00018283	0.0202354	FALSE
ANGPT2	12619.7	-0.79263	0.211967	-3.73941	0.000184453	0.0203144	FALSE
TRIM45	2186.87	-0.823775	0.220398	-3.73766	0.000185739	0.0203558	FALSE
MAFB	1299	1.02952	0.27588	3.73176	0.000190143	0.0207367	FALSE
FBXO31	543.527	0.417557	0.111934	3.7304	0.00019118	0.0207486	FALSE
NKAIN4	79.6948	1.04271	0.27972	3.72768	0.000193249	0.0208718	FALSE
CRIP3	53.1559	1.0292	0.27647	3.72267	0.000197128	0.0211885	FALSE
FRMD4A	1925.37	-0.803153	0.216459	-3.71041	0.000206926	0.0221351	FALSE
CPB1	1163.59	-1.51235	0.408377	-3.70331	0.000212805	0.0225482	FALSE
TCEAL9	4161.09	-0.614051	0.165775	-3.70412	0.000212122	0.0225482	FALSE
PTHLH	64.8086	1.19896	0.324081	3.69958	0.000215952	0.0226669	FALSE
TFEB	53.7354	1.1466	0.309919	3.69967	0.000215877	0.0226669	FALSE
ASPHD1	121.16	1.19013	0.321926	3.69689	0.000218255	0.0226955	FALSE
SEMA7A	97.3439	0.855494	0.231345	3.69792	0.000217372	0.0226955	FALSE
EHBP1L1	541.927	0.772409	0.209206	3.69209	0.000222416	0.0228302	FALSE
PISD	1138.81	0.389538	0.105546	3.6907	0.000223635	0.0228302	FALSE
PSTPIP1	8.22847	1.62298	0.439418	3.69348	0.000221205	0.0228302	FALSE
TMEM86B	96.3423	1.06041	0.287286	3.69114	0.000223251	0.0228302	FALSE
ANXA6	6550.78	0.799137	0.216877	3.68475	0.000228924	0.022951	FALSE
C1orf168	653.074	-0.831842	0.225715	-3.68537	0.00022837	0.022951	FALSE
FABP1	145.425	1.66476	0.451554	3.68675	0.000227137	0.022951	FALSE
STMN2	1728.39	1.352	0.36686	3.68533	0.000228407	0.022951	FALSE
SRL	36.1523	1.4276	0.388227	3.67722	0.000235792	0.0235339	FALSE
CPLX2	811.185	1.18318	0.322389	3.67003	0.00024252	0.0240687	FALSE
SLC2A5	10.9214	1.55804	0.424626	3.66921	0.000243303	0.0240687	FALSE
HAGLR	25.537	0.951978	0.259639	3.66655	0.000245849	0.0241072	FALSE
NR4A3	244.734	-0.929001	0.25335	-3.66687	0.000245533	0.0241072	FALSE
C9orf16	2500.73	1.22306	0.334015	3.66169	0.000250558	0.024231	FALSE
CHST8	185.059	1.32139	0.360637	3.66404	0.000248271	0.024231	FALSE
CTA-398F10.2	7.28012	-1.37996	0.376795	-3.66236	0.000249901	0.024231	FALSE
GOLT1A	220.968	0.885313	0.24191	3.65968	0.00025253	0.024231	FALSE
MIR124-2HG	23.9607	1.45578	0.397702	3.66049	0.000251732	0.024231	FALSE
TMEM185A	542.094	-0.775804	0.212128	-3.65725	0.000254936	0.0242536	FALSE
TTK	929.892	-0.829424	0.22678	-3.65739	0.000254798	0.0242536	FALSE
RP1-269M15.3	90.4067	-0.803931	0.219989	-3.65441	0.000257774	0.0244197	FALSE
CCK	30.616	1.5759	0.431818	3.64945	0.000262804	0.0247912	FALSE
RIN1	49.8233	1.03165	0.283159	3.64336	0.000269104	0.0252788	FALSE
ARHGAP25	9.14051	1.40159	0.385505	3.63573	0.0002772	0.0259303	FALSE
SARDH	157.349	0.80686	0.222103	3.63283	0.000280333	0.0261142	FALSE
OLFM1	134.134	1.24336	0.342698	3.62814	0.000285473	0.0263908	FALSE
P2RX1	147.962	1.00269	0.276379	3.62797	0.000285664	0.0263908	FALSE
DYNC1I1	101.187	1.07613	0.296987	3.62348	0.000290665	0.0265241	FALSE
GCK	507.293	1.11288	0.307088	3.62398	0.000290105	0.0265241	FALSE
HS6ST3	91.7525	-1.10565	0.305063	-3.62433	0.000289716	0.0265241	FALSE
SMAD9	371.118	-0.939986	0.259561	-3.62144	0.000292965	0.0266253	FALSE
PSD	647.943	0.85873	0.237261	3.61935	0.000295345	0.0267329	FALSE
PLK3	281.525	0.652043	0.180245	3.61754	0.000297413	0.0268115	FALSE
CD1D	23.6421	1.04622	0.2896	3.61263	0.000303103	0.0272044	FALSE
FAM49A	148.34	0.788338	0.218274	3.61169	0.000304205	0.0272044	FALSE
ABLIM3	19.7277	1.11391	0.308911	3.60592	0.000311044	0.0277052	FALSE
RHOH	160.91	0.932739	0.258824	3.60375	0.000313654	0.0277959	FALSE
TEX15	80.4613	-1.28282	0.35604	-3.60301	0.000314549	0.0277959	FALSE
CD44	51.3323	1.23832	0.344534	3.5942	0.000325395	0.0283514	FALSE
KLB	109.171	1.16969	0.325452	3.59407	0.000325559	0.0283514	FALSE
MIR217HG	42.9876	1.13712	0.316412	3.59379	0.000325907	0.0283514	FALSE
PDPN	604.915	-0.688665	0.191567	-3.5949	0.000324511	0.0283514	FALSE
MYBPC1	38.6409	-1.19774	0.333435	-3.59214	0.000327971	0.0284204	FALSE
OAS1	15.6494	1.14278	0.318495	3.58807	0.00033314	0.0287568	FALSE
GAST	36.8188	1.50492	0.41971	3.58562	0.000336281	0.0289163	FALSE
LIPC	76.5958	1.25961	0.351428	3.58427	0.000338021	0.0289545	FALSE
ADCY4	8.78517	1.29882	0.362906	3.57894	0.000344986	0.0294384	FALSE
LMO2	115.968	1.04282	0.291467	3.57782	0.000346469	0.0294525	FALSE
CCDC78	25.9637	1.03383	0.289507	3.57101	0.000355608	0.0299244	FALSE
CTHRC1	165.755	0.920539	0.257704	3.57208	0.00035416	0.0299244	FALSE
GPSM2	342.297	-0.430602	0.120595	-3.57064	0.000356115	0.0299244	FALSE
TPM2	1501.32	0.923171	0.258612	3.56971	0.000357374	0.0299244	FALSE
ZCCHC18	191.905	0.72911	0.204383	3.56737	0.000360576	0.0300799	FALSE
MOB3B	549.766	-0.520703	0.146098	-3.56407	0.000365155	0.0303486	FALSE
AMOT	10073.2	-0.903898	0.253847	-3.5608	0.000369722	0.0305681	FALSE
C8orf34-AS1	91.4953	-1.09217	0.30686	-3.55918	0.000372015	0.0305681	FALSE
LINC01370	52.3608	1.20406	0.33838	3.5583	0.000373265	0.0305681	FALSE
NPY1R	2000.79	-1.1318	0.317921	-3.55999	0.000370874	0.0305681	FALSE
LINC00403	9.30467	1.58281	0.445061	3.5564	0.000375973	0.0306775	FALSE
KCNF1	61.7207	1.15618	0.325389	3.55322	0.000380541	0.0309373	FALSE
KCNH6	1098.96	0.989604	0.278638	3.55157	0.000382933	0.031019	FALSE
AMER3	397.089	1.01291	0.285282	3.55056	0.000384408	0.031026	FALSE
RP11-503C24.6	71.9227	1.02322	0.28837	3.54827	0.000387765	0.0310726	FALSE
TMEM151A	53.8958	1.2773	0.359917	3.54889	0.000386865	0.0310726	FALSE
PRPH	51.9645	1.13178	0.319153	3.54621	0.000390821	0.0312057	FALSE
LGALS7B	2.27827	1.67737	0.47326	3.54429	0.000393677	0.0313218	FALSE
CHRM2	39.4619	-1.55584	0.439176	-3.54262	0.000396169	0.0314083	FALSE
PLSCR1	980.436	-0.517908	0.146332	-3.53927	0.000401237	0.0316978	FALSE
FAM149A	529.532	-0.61163	0.172979	-3.53587	0.000406437	0.0318832	FALSE
GLYCTK	511.128	0.859733	0.243137	3.53601	0.000406222	0.0318832	FALSE
AC064875.2	4.81894	1.51668	0.429511	3.53119	0.000413702	0.031988	FALSE
MX1	303.748	0.837275	0.237075	3.53168	0.000412926	0.031988	FALSE
PSCA	68.3823	1.23856	0.350828	3.5304	0.000414927	0.031988	FALSE
RP11-298I3.4	37.6735	-0.911467	0.258124	-3.53112	0.000413802	0.031988	FALSE
TAP2	36.958	0.762881	0.21596	3.53251	0.000411638	0.031988	FALSE
DYSF	319.903	0.619434	0.17578	3.52392	0.00042521	0.0325605	FALSE
NTRK1	15.684	1.22335	0.34716	3.52389	0.000425266	0.0325605	FALSE
CAMKK1	181.194	0.70402	0.200067	3.51893	0.000433291	0.0330617	FALSE
GHR	327.48	-0.833626	0.237182	-3.51472	0.000440224	0.0334765	FALSE
SMIM14	3034.57	-0.74531	0.212118	-3.51365	0.000441993	0.033497	FALSE
PARVB	245.524	0.935205	0.266401	3.51052	0.000447229	0.0335527	FALSE
PLAC8	119.584	0.824394	0.234817	3.5108	0.000446758	0.0335527	FALSE
TRPM2	71.6552	1.00805	0.287104	3.51108	0.000446288	0.0335527	FALSE
DLL4	233.406	0.717512	0.204613	3.50668	0.000453737	0.033814	FALSE
KCNA5	50.7556	1.33597	0.380975	3.50671	0.000453679	0.033814	FALSE
ESM1	50.1121	1.65481	0.472296	3.50375	0.000458751	0.034074	FALSE
PPP1R1A	2576.15	0.908676	0.259413	3.50281	0.000460377	0.0340816	FALSE
ATXN7L1	243.689	-0.752857	0.215102	-3.49999	0.000465271	0.0343302	FALSE
ACTG2	70.4677	1.17469	0.335835	3.49782	0.000469086	0.0344323	FALSE
BRCA1	569.695	-0.564763	0.161499	-3.49701	0.000470508	0.0344323	FALSE
PPFIA3	178.947	0.936554	0.267867	3.49635	0.000471677	0.0344323	FALSE
TNF	20.6011	1.26094	0.360711	3.4957	0.000472815	0.0344323	FALSE
MYH6	5.43203	1.66042	0.475243	3.49382	0.000476156	0.034563	FALSE
CORO1A	46.0361	1.31438	0.376323	3.49271	0.000478151	0.0345955	FALSE
DRD1	17.2556	-1.05991	0.30365	-3.49055	0.000482022	0.0347631	FALSE
TMEM232	128.589	-0.776344	0.222709	-3.48591	0.00049046	0.0352579	FALSE
APELA	301.699	-0.481698	0.138348	-3.48178	0.000498092	0.0356876	FALSE
CDH22	209.812	1.14763	0.32985	3.47925	0.000502813	0.0356876	FALSE
RBP4	1051.82	1.64164	0.471707	3.4802	0.000501038	0.0356876	FALSE
STON2	679.093	-0.503187	0.144625	-3.47925	0.000502823	0.0356876	FALSE
CALY	253.176	1.26437	0.363607	3.4773	0.000506497	0.0358347	FALSE
GJA4	469.534	1.31621	0.378796	3.47473	0.000511366	0.036065	FALSE
COQ10A	421.378	0.379215	0.109226	3.47183	0.000516929	0.0363427	FALSE
IQCG	399.14	-0.532594	0.153567	-3.46816	0.000524032	0.0366118	FALSE
MSH6	5357.54	-0.474991	0.13695	-3.46835	0.000523669	0.0366118	FALSE
AC006273.5	63.1206	-0.735292	0.212323	-3.46308	0.000534034	0.0370789	FALSE
LCN2	33.7339	1.2106	0.34953	3.46351	0.000533186	0.0370789	FALSE
DESI1	1290.37	0.236896	0.0684251	3.46212	0.000535939	0.0370959	FALSE
NECAB2	255.082	1.01646	0.293693	3.46096	0.000538249	0.0371408	FALSE
EBF3	64.3027	1.17266	0.338936	3.45982	0.000540533	0.0371837	FALSE
NTNG2	232.945	0.987856	0.28562	3.45863	0.000542926	0.0372337	FALSE
ALDH1A1	8239.36	0.860895	0.249117	3.45579	0.000548685	0.0375136	FALSE
RP11-470C13.4	18.5181	0.913565	0.264622	3.45234	0.000555757	0.0378813	FALSE
PARM1	1356.19	0.765667	0.222141	3.44676	0.00056735	0.0385539	FALSE
AACS	1214.34	0.300152	0.0871674	3.4434	0.000574444	0.0386833	FALSE
COL2A1	15719.5	-0.517215	0.150145	-3.44476	0.00057156	0.0386833	FALSE
GJD2	40.5127	1.13133	0.328543	3.44346	0.000574316	0.0386833	FALSE
TNNT1	175.141	1.32277	0.384369	3.44142	0.000578661	0.0388502	FALSE
MLN	4.79446	1.56234	0.4542	3.43977	0.000582218	0.038972	FALSE
CIDEA	4.86761	1.55315	0.451783	3.43782	0.000586423	0.0390789	FALSE
CPAMD8	757.69	-0.382566	0.111318	-3.43668	0.000588882	0.0390789	FALSE
PRSS12	1122.42	0.642693	0.187055	3.43585	0.000590703	0.0390789	FALSE
ZNF330	1550.22	0.439481	0.127912	3.4358	0.000590807	0.0390789	FALSE
FGF19	78.7098	1.34365	0.391227	3.43446	0.000593745	0.0391574	FALSE
MAPK11	176.855	0.960778	0.279829	3.43345	0.000595962	0.039188	FALSE
CNTNAP2	328.985	0.611568	0.178345	3.42913	0.000605521	0.0396998	FALSE
CD2	3.00499	1.58657	0.462921	3.42731	0.000609598	0.0398502	FALSE
FAM111A	1257.08	-0.74855	0.218673	-3.42316	0.000618985	0.040264	FALSE
TRPV3	80.0268	-0.67522	0.197265	-3.42292	0.00061953	0.040264	FALSE
ANKRD33	41.4009	0.861687	0.251984	3.41962	0.000627097	0.0404035	FALSE
FAIM2	7.36277	1.332	0.389478	3.41997	0.000626281	0.0404035	FALSE
NPY5R	403.338	-1.05047	0.307135	-3.42022	0.000625712	0.0404035	FALSE
NNMT	34.7292	1.30809	0.383659	3.40951	0.000650794	0.0418098	FALSE
CSDC2	72.8865	0.851712	0.250022	3.40655	0.000657888	0.0421444	FALSE
AK5	324.611	0.943764	0.277324	3.40311	0.000666239	0.0423456	FALSE
ASCL2	20.163	1.48773	0.437191	3.40291	0.000666711	0.0423456	FALSE
CLEC14A	21.7839	1.179	0.346406	3.40354	0.000665195	0.0423456	FALSE
ARRDC3	1549.34	-1.0241	0.301101	-3.4012	0.000670907	0.0424247	FALSE
FFAR2	157.732	1.17966	0.347001	3.3996	0.000674844	0.0424247	FALSE
LRTM2	10.9612	1.33018	0.391306	3.39935	0.000675467	0.0424247	FALSE
PRND	11.5046	1.60202	0.471278	3.39932	0.000675547	0.0424247	FALSE
SLC6A12	41.5562	0.925715	0.272468	3.39751	0.000680013	0.0425856	FALSE
BICDL1	372.982	0.627693	0.184861	3.39549	0.000685066	0.0427822	FALSE
CBLN4	61.6701	1.42151	0.419479	3.38876	0.0007021	0.0437238	FALSE
CD6	16.8461	1.12812	0.333277	3.38494	0.000711939	0.0437275	FALSE
CKMT2	118.581	0.804336	0.237455	3.38732	0.000705787	0.0437275	FALSE
CLDN1	3171.77	-0.853498	0.252013	-3.38673	0.000707318	0.0437275	FALSE
PLXDC2	1107.92	-0.715506	0.211364	-3.38518	0.00071131	0.0437275	FALSE
SLC35G2	139.522	0.861295	0.254441	3.38505	0.000711658	0.0437275	FALSE
LINC01152	60.6227	-0.660253	0.1951	-3.38417	0.000713933	0.0437299	FALSE
GABRA5	10.31	1.2273	0.363098	3.38007	0.000724671	0.0442663	FALSE
PHYHIP	158.948	1.12918	0.33425	3.37825	0.000729483	0.0444388	FALSE
KCNJ3	143.807	-0.993731	0.294424	-3.37516	0.000737715	0.0448182	FALSE
SPTLC2	2412.84	-0.580263	0.171975	-3.37411	0.000740547	0.0448683	FALSE
PROCR	46.0576	0.986135	0.29246	3.37187	0.0007466	0.0451128	FALSE
CDHR3	1075.56	-0.99165	0.294473	-3.36754	0.000758415	0.0455618	FALSE
DUSP5	2886.34	0.758824	0.225384	3.3668	0.000760454	0.0455618	FALSE
KCTD16	1579.27	-0.882346	0.262179	-3.36544	0.00076422	0.0455618	FALSE
RP11-386G11.5	37.3395	0.964946	0.286612	3.36674	0.000760635	0.0455618	FALSE
TMEM220	43.0608	0.623175	0.185152	3.36575	0.000763369	0.0455618	FALSE
NRXN2	38.6236	0.990599	0.294673	3.36169	0.000774668	0.0460618	FALSE
PCED1B	49.489	1.13719	0.338386	3.36063	0.000777647	0.0461163	FALSE
NKAIN2	74.5839	-1.04964	0.312533	-3.3585	0.000783666	0.0463145	FALSE
SLC38A4	313.856	-1.08329	0.322601	-3.35798	0.000785132	0.0463145	FALSE
F13A1	2.48047	1.58978	0.473589	3.35688	0.000788286	0.0463782	FALSE
CLDN16	5.30565	-1.31274	0.391498	-3.35313	0.000799023	0.0468865	FALSE
C5orf38	166.338	1.15405	0.344847	3.34656	0.000818204	0.0477794	FALSE
RASL12	91.0818	0.928543	0.277471	3.34646	0.000818514	0.0477794	FALSE
SPTLC3	2558.06	-0.769573	0.230019	-3.34569	0.000820774	0.0477866	FALSE
HERC5	293.027	0.91917	0.275179	3.34026	0.00083699	0.0484206	FALSE
PHLDA2	139.177	1.33672	0.400116	3.34083	0.000835289	0.0484206	FALSE
PRPS2	215.43	0.822546	0.246281	3.33987	0.000838161	0.0484206	FALSE
GSTA8P	5.65665	-1.36676	0.40943	-3.33821	0.000843209	0.0485867	FALSE
ACTL6B	111.197	1.21961	0.365525	3.3366	0.000848107	0.0487433	FALSE
AMPD2	2302.78	0.432622	0.129734	3.33469	0.000853951	0.0488901	FALSE
MAG	3.73133	1.56733	0.470157	3.33362	0.000857223	0.0488901	FALSE
MID1IP1	1600	0.468612	0.140562	3.33384	0.000856566	0.0488901	FALSE
JAM2	140.478	-0.760969	0.228363	-3.33227	0.0008614	0.0490033	FALSE
NIM1K	9.93041	1.20396	0.361694	3.32868	0.000872587	0.0493884	FALSE
WLS	6539.27	-0.630087	0.189282	-3.32882	0.000872143	0.0493884	FALSE
C10orf10	7670.05	0.808239	0.243054	3.32535	0.000883072	0.0497301	FALSE
LRRCC1	286.969	-0.698652	0.210098	-3.32536	0.000883052	0.0497301	FALSE
CBX3	5348.32	-0.47157	0.14187	-3.32395	0.000887521	0.0497952	FALSE
GBA2	3019.61	0.380995	0.114642	3.32335	0.00088943	0.0497952	FALSE
SERPINA11	152.754	-1.01587	0.30572	-3.32289	0.00089091	0.0497952	FALSE
QPCT	465.79	0.713766	0.214869	3.32187	0.000894171	0.0498528	FALSE
C20orf166-AS1	20.9779	0.976473	0.294104	3.32016	0.000899669	0.0499104	FALSE
DSE	1103.13	-0.76555	0.230564	-3.32034	0.00089908	0.0499104	FALSE
KHK	106.72	0.983977	0.296517	3.31845	0.000905181	0.0500919	FALSE
CTC-340A15.2	43.5972	-0.904049	0.272596	-3.31644	0.000911717	0.050329	FALSE
SPTBN4	149.049	1.14186	0.344688	3.31274	0.000923857	0.0507486	FALSE
STARD8	40.0789	0.854417	0.257872	3.31333	0.000921906	0.0507486	FALSE
C5	1994.09	-0.843479	0.254818	-3.31013	0.00093254	0.0508507	FALSE
KRT17	16.3382	1.45641	0.439893	3.31083	0.000930185	0.0508507	FALSE
MS4A8	48.8139	-0.875076	0.264352	-3.31027	0.000932047	0.0508507	FALSE
CPA1	827.306	0.790377	0.239158	3.30483	0.000950325	0.0508923	FALSE
CYYR1	618.815	-0.38542	0.116737	-3.30162	0.000961278	0.0508923	FALSE
FMO5	110.615	-0.674588	0.204175	-3.30397	0.000953258	0.0508923	FALSE
FRZB	13241.6	-1.11806	0.338126	-3.30663	0.000944253	0.0508923	FALSE
G0S2	87.6686	1.18698	0.358917	3.30712	0.000942615	0.0508923	FALSE
HAGHL	88.8581	0.954634	0.289296	3.29985	0.000967376	0.0508923	FALSE
MUC12	54.2906	1.08922	0.329673	3.30395	0.000953338	0.0508923	FALSE
PTPRE	67.2932	0.76121	0.230283	3.30554	0.000947922	0.0508923	FALSE
PTPRN	1824.31	1.06355	0.322161	3.30129	0.00096241	0.0508923	FALSE
RINL	71.7109	0.609627	0.184728	3.30014	0.00096638	0.0508923	FALSE
RP11-718O11.1	4.84905	-1.35772	0.411153	-3.30223	0.000959199	0.0508923	FALSE
RP11-98D18.9	23.2992	0.78109	0.236374	3.30447	0.000951576	0.0508923	FALSE
SLC16A9	804.723	-0.64435	0.195268	-3.29983	0.000967448	0.0508923	FALSE
TMCC2	341.188	0.511388	0.154687	3.30596	0.000946528	0.0508923	FALSE
UNC5A	356.732	0.986639	0.298956	3.30028	0.000965895	0.0508923	FALSE
ICAM1	108.788	0.924114	0.280121	3.29898	0.000970384	0.0509269	FALSE
NUP62CL	130.948	-0.552757	0.167658	-3.29693	0.000977462	0.0511783	FALSE
SLC9B2	175.795	0.718576	0.218131	3.29425	0.000986859	0.0515496	FALSE
DNAJC12	265.24	0.909745	0.276381	3.29164	0.000996058	0.0519088	FALSE
RNF182	180.36	-0.681278	0.207237	-3.28743	0.00101107	0.0525683	FALSE
CKMT1B	33.0272	1.01517	0.309731	3.27758	0.00104702	0.0543113	FALSE
KIAA2012	23.2758	1.07064	0.326819	3.27595	0.00105305	0.054498	FALSE
GPR63	256.786	-0.977147	0.298478	-3.27376	0.00106126	0.0547016	FALSE
SRGAP1	1037.81	-0.612588	0.18713	-3.2736	0.00106188	0.0547016	FALSE
HNRNPH3	5529.72	-0.470461	0.143745	-3.27289	0.00106455	0.0547132	FALSE
CCDC184	25.449	1.10442	0.337531	3.27205	0.00106771	0.0547351	FALSE
GABRA4	6.22189	-1.52574	0.466378	-3.27148	0.00106988	0.0547351	FALSE
TAF1A	448.249	-0.751079	0.229847	-3.26774	0.00108412	0.055337	FALSE
CDH2	11707.5	-0.756236	0.23201	-3.2595	0.00111609	0.0567101	FALSE
PPP2R5B	533.93	0.550876	0.168985	3.25992	0.00111444	0.0567101	FALSE
MIR222HG	61.1223	0.749186	0.229928	3.25835	0.00112062	0.0568112	FALSE
BLACAT1	79.84	0.76095	0.233634	3.25702	0.0011259	0.0568213	FALSE
GABRB2	870.682	-0.993157	0.304892	-3.2574	0.00112437	0.0568213	FALSE
OLFML2A	844.864	-0.668614	0.205361	-3.2558	0.00113073	0.0569364	FALSE
COMP	5.7119	1.27172	0.390709	3.25491	0.00113426	0.0569859	FALSE
SIX2	5.04697	1.41434	0.434841	3.25255	0.00114373	0.0573329	FALSE
THEM6	746.948	0.968496	0.297897	3.25111	0.00114956	0.0574959	FALSE
STARD5	171.238	0.522412	0.160749	3.24986	0.00115463	0.0576208	FALSE
VGLL4	3492.26	-0.335708	0.103335	-3.24874	0.00115917	0.0577182	FALSE
PRIM2	273.21	-0.427901	0.131771	-3.24732	0.00116498	0.057879	FALSE
POU3F1	11.4071	-1.43064	0.44065	-3.24665	0.00116771	0.0578857	FALSE
C6orf222	61.3165	1.0562	0.325644	3.24341	0.00118108	0.0584189	FALSE
CDKN2B	296.68	0.978459	0.302091	3.23896	0.00119967	0.0592075	FALSE
LINC00237	7.66359	1.35023	0.417014	3.23784	0.00120438	0.0593092	FALSE
UNC5C	1959.3	-0.899143	0.277773	-3.23697	0.00120808	0.0593605	FALSE
COPG1	4546.18	0.342402	0.105836	3.2352	0.00121559	0.0594694	FALSE
METRN	1199.31	1.10077	0.340247	3.23519	0.00121562	0.0594694	FALSE
GHRL	1356.03	0.961267	0.297407	3.23216	0.00122859	0.0599731	FALSE
ALOX5AP	6.95131	1.46441	0.453381	3.22998	0.00123797	0.0600376	FALSE
CTD-2298J14.2	14.2424	-1.07693	0.333345	-3.23066	0.00123503	0.0600376	FALSE
TAGLN3	853.459	0.844829	0.261547	3.23012	0.0012374	0.0600376	FALSE
FER1L6	39.4754	-1.34562	0.416753	-3.22882	0.00124302	0.0601519	FALSE
FAM174B	3269.78	-0.651603	0.20185	-3.22815	0.00124595	0.0601635	FALSE
NEFM	1182.63	1.13792	0.352784	3.22555	0.0012573	0.0605806	FALSE
PON2	2422.14	-0.323571	0.100341	-3.22473	0.00126092	0.0606246	FALSE
S100A6	2483.8	1.17102	0.363276	3.22351	0.00126631	0.0607528	FALSE
CABP7	39.8978	1.27049	0.394236	3.22267	0.00127	0.0607993	FALSE
APOA2	2976.34	1.08523	0.337095	3.21936	0.00128476	0.0609837	FALSE
CCDC146	372.802	-0.618652	0.192075	-3.22089	0.00127793	0.0609837	FALSE
CHRNA2	10.9424	1.22944	0.381889	3.21937	0.00128472	0.0609837	FALSE
FAM122C	236.472	-0.377619	0.117272	-3.22002	0.00128183	0.0609837	FALSE
CRHR2	29.7532	0.990525	0.307897	3.21707	0.00129508	0.0612137	FALSE
NFIX	41.0222	-0.717052	0.222864	-3.21745	0.00129336	0.0612137	FALSE
CD93	33.7914	1.49577	0.465187	3.21543	0.00130251	0.0614352	FALSE
DLGAP1-AS2	36.0722	0.816997	0.254245	3.21343	0.00131161	0.0617339	FALSE
SCUBE3	943.88	-0.872234	0.271764	-3.20953	0.00132952	0.0624454	FALSE
FFAR4	28.3732	1.06605	0.332249	3.2086	0.00133385	0.0625174	FALSE
APPL2	4449.53	-0.404341	0.126042	-3.20798	0.00133673	0.0625215	FALSE
PDE1C	345.514	-0.777624	0.24252	-3.20643	0.00134392	0.0627264	FALSE
COL16A1	188.445	0.718401	0.224199	3.20429	0.00135394	0.0629509	FALSE
VEGFC	85.4345	-0.912878	0.2849	-3.20421	0.00135436	0.0629509	FALSE
LYSMD2	67.2365	0.951268	0.297294	3.19976	0.00137542	0.0637974	FALSE
HIST1H2BJ	65.0866	0.672394	0.210318	3.19703	0.00138849	0.0642702	FALSE
LY6H	322.302	0.957096	0.299442	3.19627	0.00139217	0.0643073	FALSE
SORD	8310.64	-0.639816	0.200315	-3.19404	0.00140296	0.0646723	FALSE
FTCD	676.96	0.886533	0.277618	3.19335	0.0014063	0.0646929	FALSE
STK10	703.688	0.395883	0.124001	3.19257	0.00141013	0.0647359	FALSE
CD300A	293.003	-0.686475	0.21528	-3.18875	0.00142892	0.0653495	FALSE
GNRH2	43.2652	1.29954	0.407612	3.18818	0.0014317	0.0653495	FALSE
MSRB1	699.833	0.926761	0.290697	3.18807	0.00143227	0.0653495	FALSE
SEPT5	373.345	0.574891	0.180392	3.18689	0.00143811	0.0654821	FALSE
HCLS1	9.93878	1.38968	0.436321	3.18499	0.00144761	0.0655145	FALSE
PCSK2	212.293	0.957254	0.300527	3.18526	0.00144626	0.0655145	FALSE
TPBG	2409.46	-0.477696	0.149955	-3.1856	0.00144455	0.0655145	FALSE
PRR16	9.82133	1.10858	0.34838	3.18209	0.00146216	0.0660393	FALSE
PCYOX1	2778.29	-0.698896	0.219761	-3.18025	0.0014715	0.0663273	FALSE
HABP2	3405.64	-0.828912	0.260912	-3.17698	0.00148816	0.0668338	FALSE
SCN9A	442.404	-0.839881	0.264373	-3.17687	0.00148872	0.0668338	FALSE
LSS	2777.42	0.408877	0.128847	3.17335	0.0015069	0.0673797	FALSE
SELPLG	6.56234	1.49413	0.470778	3.17374	0.00150489	0.0673797	FALSE
C15orf48	62.8919	1.12683	0.355348	3.17107	0.0015188	0.0677119	FALSE
HNF1A	357.017	0.709732	0.223836	3.17076	0.00152039	0.0677119	FALSE
GNG8	12.0694	1.3235	0.417962	3.16657	0.0015425	0.0682884	FALSE
PLIN5	82.7315	0.635346	0.200607	3.16712	0.00153956	0.0682884	FALSE
SCD5	1351.28	-0.644363	0.203421	-3.16764	0.00153681	0.0682884	FALSE
CDHR2	12.8273	1.19502	0.377658	3.1643	0.00155457	0.0685347	FALSE
CLDN5	34.0421	1.39581	0.441181	3.1638	0.00155726	0.0685347	FALSE
NMUR1	20.7698	1.48344	0.468795	3.16436	0.00155426	0.0685347	FALSE
MVK	461.625	0.715775	0.226288	3.16312	0.00156089	0.0685595	FALSE
RP11-401P9.5	6.06132	1.25766	0.398117	3.15902	0.00158299	0.0693939	FALSE
PCBP3	40.6982	0.96189	0.30465	3.15736	0.00159202	0.0696533	FALSE
C2orf70	22.285	0.926752	0.293619	3.15631	0.00159777	0.0697683	FALSE
ABLIM2	139.585	0.567542	0.180357	3.14677	0.00165083	0.0716617	FALSE
LINC01202	5.07484	1.33014	0.42285	3.14565	0.00165716	0.0716617	FALSE
RESP18	4.86316	1.4407	0.45767	3.1479	0.00164448	0.0716617	FALSE
RP11-123K19.1	437.158	0.873907	0.277678	3.14719	0.00164846	0.0716617	FALSE
SOX2-OT	12.8724	-1.11036	0.352967	-3.14577	0.00165649	0.0716617	FALSE
AGAP2	84.7371	1.04443	0.332756	3.13871	0.00169691	0.0732389	FALSE
KIF19	1049.35	0.706629	0.225195	3.13786	0.00170186	0.0733111	FALSE
AC068535.3	23.4758	1.40882	0.449351	3.13524	0.00171714	0.0733476	FALSE
ALDH1L1	84.7543	0.850747	0.271316	3.13564	0.00171481	0.0733476	FALSE
CDH18	80.1533	0.880325	0.280807	3.13498	0.00171864	0.0733476	FALSE
FGD5	120.858	0.726488	0.231742	3.1349	0.00171911	0.0733476	FALSE
TLR5	94.3947	0.676032	0.215493	3.13714	0.00170603	0.0733476	FALSE
GPM6B	748.42	-0.613083	0.195687	-3.13297	0.00173047	0.0736915	FALSE
PPP4R4	458.34	-0.592946	0.1893	-3.13232	0.00173433	0.0737156	FALSE
SCTR	136.473	0.994661	0.317611	3.13169	0.001738	0.0737316	FALSE
CARS	1440.44	0.383369	0.122516	3.12912	0.00175331	0.0741631	FALSE
TUBB6	875.619	1.08189	0.345777	3.12887	0.00175481	0.0741631	FALSE
C16orf86	93.0607	0.943968	0.301814	3.12765	0.00176211	0.0742212	FALSE
TCF4	1874.61	-0.599114	0.191562	-3.12753	0.00176282	0.0742212	FALSE
HAGH	978.046	0.616252	0.197192	3.12513	0.00177725	0.0745478	FALSE
ISG15	377.605	1.01125	0.32356	3.12539	0.00177567	0.0745478	FALSE
CCDC188	20.5147	1.01238	0.324199	3.12272	0.00179191	0.0746029	FALSE
FBXL16	382.52	0.89219	0.285709	3.12272	0.00179186	0.0746029	FALSE
PLCL1	2580.11	-0.927701	0.29705	-3.12304	0.00178993	0.0746029	FALSE
ZHX2	1111.85	-0.459099	0.146971	-3.12375	0.00178563	0.0746029	FALSE
PAH	79.3889	0.969222	0.310453	3.12196	0.0017965	0.074655	FALSE
CDO1	1021.78	-0.507447	0.162596	-3.12091	0.00180291	0.0747821	FALSE
DCLK1	332.753	-0.747941	0.239729	-3.11994	0.00180887	0.0748906	FALSE
NCAM1	3394.92	-0.693766	0.222457	-3.11866	0.00181676	0.0750782	FALSE
GLUD2	36.5556	-1.2441	0.399013	-3.11795	0.00182113	0.0751198	FALSE
SH2D3C	233.008	0.753513	0.24177	3.11665	0.00182919	0.0753135	FALSE
NHSL2	433.492	-0.676326	0.217106	-3.11519	0.00183827	0.0755188	FALSE
PARN	871.969	-0.32687	0.104942	-3.11476	0.00184093	0.0755188	FALSE
KISS1	32.2506	1.11649	0.358557	3.11384	0.00184667	0.0756154	FALSE
LGI2	2311.12	-0.720604	0.231494	-3.11284	0.00185296	0.0757341	FALSE
DUSP9	545.499	1.0502	0.337478	3.1119	0.00185888	0.0758376	FALSE
PKNOX2	926.698	-0.392901	0.12651	-3.10569	0.00189838	0.0773079	FALSE
CNBD2	57.9051	0.750733	0.242078	3.10121	0.00192734	0.0782026	FALSE
VEPH1	125.114	-0.761155	0.245435	-3.10125	0.00192708	0.0782026	FALSE
HMGA2	5844.92	-0.590543	0.190561	-3.09898	0.0019419	0.0786506	FALSE
HMGB1P6	5.23435	-1.25954	0.406515	-3.09837	0.00194587	0.0786686	FALSE
APOM	295.24	1.05491	0.340888	3.09458	0.00197089	0.0786842	FALSE
CPNE9	20.7778	1.06602	0.344431	3.09501	0.00196808	0.0786842	FALSE
FSTL3	368.189	0.760953	0.245685	3.09727	0.00195311	0.0786842	FALSE
IFIT1	56.7454	0.747115	0.241382	3.09515	0.00196714	0.0786842	FALSE
PRR18	27.41	0.84939	0.274367	3.09582	0.00196271	0.0786842	FALSE
RGS9	688.18	0.775376	0.250549	3.09471	0.00197003	0.0786842	FALSE
RP11-173C1.1	5.01808	1.35028	0.436255	3.09516	0.00196708	0.0786842	FALSE
LTB	794.593	1.1979	0.387184	3.09387	0.00197564	0.0787331	FALSE
TMEM130	67.9161	0.945789	0.305997	3.09084	0.00199588	0.0793983	FALSE
BARD1	654.829	-0.680796	0.220417	-3.08867	0.00201055	0.0795285	FALSE
CES4A	85.9334	0.597695	0.193535	3.0883	0.00201307	0.0795285	FALSE
EZH2	1830.24	-0.269686	0.0873066	-3.08895	0.00200864	0.0795285	FALSE
RABEPK	290.381	0.617966	0.200118	3.08801	0.00201503	0.0795285	FALSE
RAC2	37.3681	1.12697	0.364984	3.08773	0.00201694	0.0795285	FALSE
LHFPL3-AS2	707.549	-0.760384	0.246393	-3.08607	0.00202824	0.0798334	FALSE
RP5-991G20.1	140.09	-0.550581	0.17846	-3.08519	0.00203425	0.0799291	FALSE
TBX2-AS1	12.2712	1.30707	0.423767	3.08441	0.00203955	0.0799969	FALSE
SLC7A4	95.9829	1.00402	0.325585	3.08375	0.00204413	0.080036	FALSE
PIK3CG	3.29995	1.45538	0.472317	3.08136	0.0020606	0.0805399	FALSE
GAL	388.683	1.17977	0.38308	3.07971	0.00207204	0.0806836	FALSE
ISG20	89.1976	0.849661	0.27593	3.07927	0.0020751	0.0806836	FALSE
LINC01594	21.181	-0.799867	0.259735	-3.07955	0.00207315	0.0806836	FALSE
SPOCK1	20324.3	-0.813074	0.264132	-3.07829	0.00208195	0.0808093	FALSE
GIMAP6	4.13372	1.45256	0.471956	3.07774	0.00208577	0.0808173	FALSE
PTPN12	3292.4	-0.47965	0.155948	-3.07571	0.00210001	0.0812282	FALSE
ACTC1	1696.5	1.22347	0.39801	3.07398	0.00211226	0.0815608	FALSE
ABCA6	233.352	-0.774784	0.252171	-3.07246	0.00212303	0.0818353	FALSE
TMPRSS4-AS1	4.57813	1.32301	0.430696	3.07179	0.00212782	0.081879	FALSE
EEF1A2	468.526	1.01149	0.329486	3.0699	0.00214129	0.081974	FALSE
MANBA	2052.18	-0.527784	0.171896	-3.07037	0.00213797	0.081974	FALSE
TSPAN32	32.6128	1.0584	0.344759	3.06997	0.00214081	0.081974	FALSE
AC013461.1	762.172	-0.459391	0.149831	-3.06606	0.00216901	0.0824703	FALSE
MPPED2	176.701	-0.444213	0.144845	-3.06681	0.00216353	0.0824703	FALSE
PDGFB	446.526	0.578854	0.188709	3.06745	0.00215895	0.0824703	FALSE
RP1-86C11.7	23.191	0.941063	0.3069	3.06634	0.00216693	0.0824703	FALSE
EDARADD	226.12	-0.595462	0.194406	-3.06299	0.00219138	0.082898	FALSE
FAM174A	359.061	0.567136	0.185121	3.0636	0.00218689	0.082898	FALSE
PLG	38.8836	1.45548	0.475171	3.06307	0.00219079	0.082898	FALSE
RP11-60L3.6	15.5426	1.20707	0.394244	3.06173	0.00220064	0.0831075	FALSE
SCN2B	16.1082	-1.11607	0.364641	-3.06074	0.00220792	0.0832419	FALSE
PREB	1447.78	0.582314	0.190457	3.05747	0.00223216	0.0840143	FALSE
CD82	336.207	0.73118	0.239347	3.0549	0.00225136	0.0845945	FALSE
ARVCF	2001.3	0.393534	0.12887	3.05372	0.00226024	0.0847677	FALSE
ENHO	24.052	1.02901	0.337184	3.05177	0.00227493	0.0847677	FALSE
GPR132	10.5074	1.19871	0.392692	3.05254	0.00226914	0.0847677	FALSE
UPP1	255.862	0.864677	0.283324	3.05191	0.00227392	0.0847677	FALSE
ZNF69	302.728	-0.733491	0.240335	-3.05196	0.00227354	0.0847677	FALSE
ADH6	7.31716	1.20376	0.394647	3.05023	0.00228668	0.0847815	FALSE
CALCOCO2	2164.02	0.424305	0.13909	3.05057	0.00228407	0.0847815	FALSE
PRLHR	110.497	1.044	0.342174	3.05107	0.0022803	0.0847815	FALSE
NDEL1	846.452	0.33613	0.110257	3.0486	0.00229913	0.0851022	FALSE
IL11	45.5286	0.888091	0.291604	3.04554	0.00232263	0.0856881	FALSE
RP11-96L14.8	5.78269	1.28088	0.420561	3.04566	0.00232169	0.0856881	FALSE
SRPRB	1234.98	0.447411	0.146982	3.04398	0.00233467	0.0858492	FALSE
WNK4	191.766	0.502601	0.16509	3.0444	0.00233142	0.0858492	FALSE
EMILIN3	40.594	0.621993	0.204394	3.04311	0.00234145	0.0859569	FALSE
SOX1	31.454	1.33961	0.440513	3.04102	0.00235778	0.0864145	FALSE
RP3-431P23.5	7.432	1.19848	0.394431	3.03849	0.00237767	0.0870009	FALSE
EYA2	67.9484	0.859139	0.283086	3.03491	0.00240611	0.0873858	FALSE
FBXL15	451.994	1.03001	0.339291	3.03577	0.00239923	0.0873858	FALSE
GFRA4	3.29511	1.41889	0.467445	3.03541	0.00240208	0.0873858	FALSE
NPM2	257.792	0.714188	0.235224	3.0362	0.00239578	0.0873858	FALSE
ROBO4	6.78066	1.43824	0.473931	3.0347	0.00240773	0.0873858	FALSE
PTAFR	83.5165	0.898296	0.296121	3.03354	0.002417	0.0875802	FALSE
C10orf54	215.655	0.859146	0.28339	3.03167	0.00243204	0.0879826	FALSE
KLHDC8B	1103.64	0.612919	0.202218	3.03097	0.00243766	0.0880433	FALSE
CADM1	6189.5	-0.606386	0.200318	-3.02711	0.00246902	0.088997	FALSE
ZFP57	8.62785	1.10734	0.36585	3.02674	0.00247203	0.088997	FALSE
STMN3	778.566	0.710538	0.234839	3.02563	0.00248112	0.0891342	FALSE
SVOP	156.908	1.00431	0.331969	3.02531	0.00248381	0.0891342	FALSE
EDAR	12.9309	-1.08518	0.359673	-3.01713	0.00255181	0.0914275	FALSE
RGS7	205.099	0.658954	0.218623	3.0141	0.00257739	0.0921965	FALSE
EPHB6	1836.93	-0.704545	0.233942	-3.01162	0.0025986	0.0927169	FALSE
GOLGA6L3	2.33168	-1.34871	0.447863	-3.01143	0.00260024	0.0927169	FALSE
TGFB1I1	162.761	1.02066	0.338989	3.01089	0.00260481	0.0927321	FALSE
CCL19	12.4752	1.27865	0.424761	3.01029	0.00260995	0.0927675	FALSE
FAM110C	393.806	-0.82889	0.275472	-3.00898	0.00262129	0.0930224	FALSE
PIM2	421.333	0.602147	0.200154	3.00842	0.00262612	0.0930463	FALSE
RP11-848P1.9	85.7113	-0.686854	0.228401	-3.00723	0.00263639	0.0932624	FALSE
CSPP1	1959.64	-0.610483	0.203047	-3.00661	0.00264175	0.0932794	FALSE
SLC25A19	136.372	0.605971	0.201573	3.00622	0.00264522	0.0932794	FALSE
SOAT2	79.2004	1.39402	0.4639	3.00501	0.00265576	0.0935037	FALSE
RP3-323P24.3	5.2905	-1.2137	0.404024	-3.00403	0.0026643	0.093657	FALSE
MYH15	29.0107	-0.961548	0.320211	-3.00286	0.00267454	0.0938693	FALSE
CCDC39	87.6438	-0.874236	0.291291	-3.00124	0.00268881	0.0940737	FALSE
NNAT	4618.68	0.722389	0.240735	3.00077	0.00269299	0.0940737	FALSE
OMA1	343.872	-0.586961	0.195603	-3.00078	0.00269291	0.0940737	FALSE
RASGRP3	12.5813	1.12777	0.375916	3.00005	0.00269934	0.0941483	FALSE
GALNT14	43.8111	0.914091	0.304767	2.99931	0.0027059	0.0942301	FALSE
C16orf54	2.381	1.401	0.467436	2.9972	0.00272476	0.0943901	FALSE
C5orf66	28.4345	0.719733	0.240159	2.9969	0.00272738	0.0943901	FALSE
FAM124B	5.41712	1.42359	0.474948	2.99737	0.00272323	0.0943901	FALSE
RP11-187O7.3	8.21316	1.0609	0.353937	2.99741	0.0027228	0.0943901	FALSE
SIPA1	298.522	0.845464	0.282175	2.99624	0.0027333	0.0944489	FALSE
ERLIN2	2483.97	-0.573556	0.191507	-2.99496	0.00274477	0.0946987	FALSE
ITM2A	312.138	-0.71324	0.238238	-2.99381	0.00275515	0.094847	FALSE
NLGN3	648.136	-0.67788	0.226447	-2.99355	0.00275755	0.094847	FALSE
TRG-AS1	4.39449	1.35511	0.452861	2.99232	0.00276862	0.0950813	FALSE
LRRFIP2	1210.35	-0.32259	0.107855	-2.99096	0.00278104	0.0953615	FALSE
WNT10A	22.8859	1.09797	0.367264	2.98959	0.00279352	0.0956429	FALSE
CACNA1S	8.13095	1.02387	0.342707	2.98761	0.00281168	0.0959704	FALSE
CHRDL2	355.501	-1.13512	0.379904	-2.98793	0.00280878	0.0959704	FALSE
STK32C	198.427	0.668504	0.22389	2.98586	0.00282778	0.0963731	FALSE
CHGA	155421	0.980536	0.328581	2.98415	0.00284368	0.0966201	FALSE
HOXD1	6.23205	1.24639	0.417658	2.98423	0.0028429	0.0966201	FALSE
MARCH3	58.0892	0.551299	0.184871	2.98207	0.00286308	0.0971318	FALSE
FAM43B	4.38899	1.3395	0.449424	2.98047	0.00287802	0.0974907	FALSE
KLF5	1954.53	-0.65081	0.218399	-2.97992	0.00288325	0.0975202	FALSE
FAM19A4	19.8227	1.14746	0.3853	2.97809	0.00290055	0.0975742	FALSE
NDFIP1	9466.42	-0.559879	0.18804	-2.97744	0.00290667	0.0975742	FALSE
PFKP	1517.68	0.745116	0.25025	2.97749	0.00290619	0.0975742	FALSE
TBX2	45.7049	1.01937	0.342294	2.97804	0.00290094	0.0975742	FALSE
ZNF430	372.493	-0.754813	0.253361	-2.9792	0.00289003	0.0975742	FALSE
CDH6	10619.7	-0.759936	0.255603	-2.97312	0.00294793	0.0986912	FALSE
PITPNM2	93.6508	0.553026	0.186021	2.97293	0.00294974	0.0986912	FALSE
RP3-355L5.5	3.39624	1.40005	0.470989	2.97257	0.00295319	0.0986912	FALSE
PTPRT	3237.34	-0.800108	0.269258	-2.97153	0.00296321	0.0988782	FALSE
FAM175A	601.183	-0.532961	0.179556	-2.96822	0.0029953	0.0998003	FALSE
IQSEC3	52.3746	1.0477	0.353228	2.96608	0.00301622	0.100348	FALSE
PLCB2	45.6444	0.861191	0.290448	2.96505	0.00302638	0.100387	FALSE
WDR78	404.546	-0.703242	0.237153	-2.96536	0.0030233	0.100387	FALSE
C11orf96	6.93058	1.34226	0.452803	2.96434	0.00303334	0.100469	FALSE
ACPP	125.455	-0.651975	0.219994	-2.9636	0.00304059	0.10056	FALSE
PDZK1	245.609	0.719924	0.243207	2.96013	0.00307509	0.101551	FALSE
GAD2	615.64	0.89995	0.304137	2.95903	0.00308607	0.101628	FALSE
RP11-496D24.2	5.85175	1.19266	0.403062	2.95899	0.00308654	0.101628	FALSE
CRH	453.387	0.889186	0.30066	2.95745	0.00310195	0.101986	FALSE
ICAM2	17.9798	1.1286	0.381779	2.95617	0.00311484	0.102259	FALSE
MASP2	4.21894	1.36967	0.463498	2.95507	0.00312602	0.102326	FALSE
ST8SIA2	1150.7	-0.582282	0.197028	-2.95532	0.00312345	0.102326	FALSE
ASAH1	3323.67	-0.400897	0.135774	-2.95268	0.00315032	0.102901	FALSE
CD52	13.7285	1.24263	0.420885	2.95243	0.0031528	0.102901	FALSE
CTD-2269F5.1	14.1913	-1.02556	0.347498	-2.95127	0.00316466	0.103138	FALSE
GPRIN1	252.949	0.702448	0.238217	2.94878	0.00319031	0.103822	FALSE
SYP	1807.55	0.81238	0.275607	2.9476	0.00320246	0.104066	FALSE
BGLAP	15.8419	1.00488	0.341026	2.94662	0.00321266	0.104246	FALSE
TRIM36	356.415	-0.690705	0.234512	-2.94528	0.00322659	0.104546	FALSE
MATK	35.0041	0.862803	0.293213	2.94258	0.00325493	0.105312	FALSE
CDH10	2850.6	-0.711298	0.241867	-2.94086	0.00327297	0.105614	FALSE
MYT1L	5.97075	1.33805	0.454996	2.94079	0.00327373	0.105614	FALSE
HMP19	182.717	0.925974	0.314979	2.9398	0.00328429	0.105762	FALSE
SLU7	1394.02	-0.27858	0.0947723	-2.93947	0.00328778	0.105762	FALSE
PNMT	24.3043	0.969676	0.330247	2.93621	0.00332247	0.106572	FALSE
SYT5	326.509	0.828801	0.282235	2.93656	0.00331871	0.106572	FALSE
CEBPA	281.075	0.921909	0.314204	2.93411	0.00334507	0.106837	FALSE
IGFALS	14.1919	1.09744	0.373987	2.93442	0.0033417	0.106837	FALSE
RP11-305B6.1	3.29052	-1.30544	0.444889	-2.93431	0.0033429	0.106837	FALSE
ARHGEF25	472.777	0.52784	0.179931	2.93357	0.00335086	0.106869	FALSE
RP11-395B7.4	11.5277	1.21019	0.41266	2.93267	0.00336065	0.107029	FALSE
ADGRE2	9.71536	1.21182	0.41349	2.9307	0.00338196	0.107554	FALSE
HLA-DQA2	87.8235	0.870368	0.297052	2.93001	0.00338946	0.107639	FALSE
ST3GAL1	458.735	0.736363	0.251439	2.9286	0.00340497	0.107979	FALSE
WFS1	1975.68	0.570419	0.194818	2.92796	0.00341194	0.108046	FALSE
ADGRA1-AS1	13.223	1.02847	0.351471	2.92619	0.0034314	0.108061	FALSE
NMNAT3	67.6965	0.664657	0.227129	2.92634	0.00342973	0.108061	FALSE
PPIF	1135.33	0.60959	0.208324	2.92616	0.00343175	0.108061	FALSE
SLC10A4	59.1925	-0.711379	0.243064	-2.92671	0.00342569	0.108061	FALSE
ANPEP	221.42	1.37853	0.471313	2.92488	0.00344589	0.108354	FALSE
PIH1D3	3.81056	-1.339	0.458061	-2.92319	0.00346462	0.108667	FALSE
ROBO3	81.4634	0.795401	0.272108	2.92311	0.00346555	0.108667	FALSE
BAMBI	780.439	0.449386	0.153806	2.92176	0.00348057	0.108832	FALSE
FCMR	3.00099	1.37245	0.469728	2.92181	0.00348009	0.108832	FALSE
CACNA1B	148.151	0.941275	0.322555	2.91819	0.00352071	0.109778	FALSE
LGR6	31.4276	1.34116	0.459557	2.91838	0.0035186	0.109778	FALSE
NUMBL	596.287	0.687988	0.235828	2.91733	0.00353045	0.109778	FALSE
NXF4	4.07998	-1.18429	0.405908	-2.91763	0.00352699	0.109778	FALSE
MEIS1	4044.48	-0.492953	0.169023	-2.91649	0.00353989	0.109918	FALSE
CNTN4	515.163	-0.786964	0.269985	-2.91484	0.00355871	0.110228	FALSE
FOXL2	4.69509	1.2393	0.425181	2.91475	0.0035597	0.110228	FALSE
C14orf93	485.971	0.643659	0.221071	2.91155	0.00359636	0.110547	FALSE
GNG3	86.9572	1.06427	0.365397	2.91264	0.00358393	0.110547	FALSE
MAPRE3	910.216	0.484696	0.166391	2.91299	0.00357989	0.110547	FALSE
SLC6A3	6.13551	1.05962	0.363974	2.91126	0.00359969	0.110547	FALSE
SULT2A1	12.1191	1.3596	0.466953	2.91165	0.00359526	0.110547	FALSE
THSD7B	408.659	-0.743534	0.255338	-2.91196	0.00359173	0.110547	FALSE
IL5RA	6.51403	1.14415	0.393215	2.90974	0.00361732	0.110832	FALSE
LRRC55	494.395	-0.867729	0.298229	-2.9096	0.00361889	0.110832	FALSE
CCDC42	5.91163	1.25942	0.433198	2.90726	0.00364606	0.111207	FALSE
LDLR	743.103	0.6659	0.229003	2.90782	0.00363955	0.111207	FALSE
LRRC10B	451.847	0.955509	0.328635	2.90751	0.00364316	0.111207	FALSE
GMPPB	741.111	0.428707	0.1476	2.90451	0.00367833	0.111886	FALSE
MINA	270.908	0.54129	0.186335	2.90493	0.00367333	0.111886	FALSE
RP11-545I5.3	35.2604	-0.555542	0.191328	-2.90361	0.0036889	0.112055	FALSE
CD3E	2.44655	1.34882	0.465033	2.90048	0.0037259	0.113026	FALSE
TAC1	5.04963	1.26779	0.437303	2.89911	0.00374224	0.113368	FALSE
SPEF2	689.802	-0.686502	0.236868	-2.89825	0.00375251	0.113525	FALSE
CYSLTR2	23.9105	1.11606	0.385559	2.89466	0.00379574	0.114523	FALSE
RP11-527D7.1	58.9855	0.916482	0.316568	2.89505	0.00379097	0.114523	FALSE
FAM189A1	235.499	0.45833	0.158367	2.8941	0.00380243	0.11457	FALSE
C2orf40	36.6835	0.937767	0.324228	2.89231	0.00382423	0.115072	FALSE
AC137932.6	5.71094	1.22959	0.425271	2.89132	0.00383627	0.115124	FALSE
COTL1	2833.16	0.7801	0.269792	2.89148	0.00383429	0.115124	FALSE
ADGRF5	7.86002	1.36387	0.472041	2.8893	0.00386095	0.115248	FALSE
CTC-524C5.2	9.0405	1.20417	0.416635	2.89023	0.00384954	0.115248	FALSE
FEV	1034.17	1.13101	0.391419	2.88952	0.00385835	0.115248	FALSE
RASSF5	49.0791	0.831412	0.287789	2.88896	0.00386517	0.115248	FALSE
TCF21	10.5306	1.0765	0.372636	2.88888	0.00386619	0.115248	FALSE
RP11-88H9.2	22.1877	0.815349	0.282435	2.88686	0.00389108	0.115836	FALSE
F12	47.7205	1.13765	0.394427	2.8843	0.00392282	0.116316	FALSE
RCAN2	1466.02	-0.326628	0.113211	-2.88513	0.00391257	0.116316	FALSE
SLC26A9	87.0552	0.787774	0.273111	2.88444	0.00392106	0.116316	FALSE
KCNK12	24.7222	1.20154	0.416639	2.88388	0.0039281	0.116319	FALSE
ENPP5	274.519	-0.625441	0.21697	-2.88262	0.00394385	0.116476	FALSE
SERPINE1	113.886	1.0433	0.361921	2.88266	0.00394331	0.116476	FALSE
RAB27B	793.308	-0.974462	0.338158	-2.88168	0.00395562	0.11667	FALSE
CRISPLD1	2106.63	-0.624923	0.216976	-2.88014	0.00397494	0.116795	FALSE
PDGFRL	247.159	-0.594505	0.206448	-2.87968	0.00398077	0.116795	FALSE
PEMT	742.127	0.850781	0.295415	2.87995	0.00397735	0.116795	FALSE
PTP4A3	1186.64	0.669942	0.232545	2.88091	0.00396528	0.116795	FALSE
COLCA2	83.4716	0.620498	0.215642	2.87745	0.00400907	0.116859	FALSE
FAM151A	50.1413	1.35464	0.47062	2.87842	0.00399673	0.116859	FALSE
HLA-DRB5	5.80744	1.33655	0.464439	2.87776	0.00400505	0.116859	FALSE
NYAP1	310.476	0.622322	0.216249	2.8778	0.00400461	0.116859	FALSE
ZBTB7C	205.173	-0.593734	0.206313	-2.87783	0.00400417	0.116859	FALSE
LDB3	29.3995	0.787827	0.27398	2.87549	0.00403397	0.117279	FALSE
ZFP36L1	8001.28	-0.621127	0.215976	-2.8759	0.00402874	0.117279	FALSE
IDH3A	467.191	0.404029	0.140611	2.87337	0.00406112	0.117762	FALSE
NCSTN	4471.19	-0.416639	0.144987	-2.87362	0.00405791	0.117762	FALSE
CCDC88C	2652.9	-0.382525	0.133242	-2.87089	0.00409315	0.118384	FALSE
TSPYL2	1372.38	0.324827	0.113135	2.87115	0.00408983	0.118384	FALSE
ESAM	48.1383	1.21932	0.4249	2.86965	0.00410924	0.118389	FALSE
HIP1	2230.76	-0.541884	0.188791	-2.87028	0.00410103	0.118389	FALSE
SALL4	3357.4	-0.616925	0.214955	-2.87003	0.00410439	0.118389	FALSE
NUBPL	341.788	-0.357023	0.124489	-2.86792	0.00413185	0.118888	FALSE
AC078941.1	268.126	-0.694268	0.242187	-2.86666	0.00414825	0.119053	FALSE
SEPT11	3897.01	-0.559959	0.195321	-2.86686	0.00414567	0.119053	FALSE
ACTA1	1422.95	1.09735	0.382854	2.86624	0.00415377	0.119059	FALSE
TRIM24	4377.42	-0.289201	0.100995	-2.8635	0.00418985	0.119939	FALSE
C20orf197	5.52873	1.2365	0.432119	2.86149	0.00421661	0.12027	FALSE
CACNG7	22.0179	0.901896	0.315112	2.86214	0.00420785	0.12027	FALSE
EHF	356.382	-1.06186	0.371096	-2.86142	0.00421754	0.12027	FALSE
APOBEC2	111.578	0.835175	0.292446	2.85583	0.00429249	0.120544	FALSE
BTBD17	177.53	1.06423	0.372224	2.85912	0.00424815	0.120544	FALSE
COL13A1	39.3679	0.82623	0.289343	2.85553	0.00429645	0.120544	FALSE
GDF15	504.41	1.04084	0.364351	2.8567	0.0042807	0.120544	FALSE
HCN1	43.2936	-0.824851	0.288845	-2.85569	0.00429429	0.120544	FALSE
HLX	12.6109	1.27394	0.445611	2.85886	0.00425166	0.120544	FALSE
LRRC7	234.197	-0.995002	0.348503	-2.85508	0.00430263	0.120544	FALSE
MAOB	70.7997	0.682593	0.239069	2.85521	0.0043008	0.120544	FALSE
MAP6	786.456	0.617649	0.216328	2.85515	0.0043016	0.120544	FALSE
RP11-196G18.3	9.14366	-0.99556	0.348497	-2.85672	0.00428039	0.120544	FALSE
SLC25A41	40.4606	0.798712	0.279282	2.85987	0.00423814	0.120544	FALSE
SLC25A42	250.987	0.574039	0.200758	2.85935	0.00424505	0.120544	FALSE
SORBS1	1777.69	-0.66125	0.231511	-2.85623	0.00428703	0.120544	FALSE
SRRM3	130.316	0.678254	0.237265	2.85863	0.00425473	0.120544	FALSE
WDR49	31.8961	-1.0894	0.381731	-2.85384	0.00431945	0.120864	FALSE
LA16c-380H5.3	56.3705	0.796814	0.279361	2.85227	0.00434077	0.121308	FALSE
DCAF12L1	52.1519	0.930575	0.326403	2.851	0.00435821	0.121643	FALSE
SLC35D3	35.0406	0.967347	0.339542	2.84897	0.00438606	0.122268	FALSE
GSAP	553.257	-0.677254	0.237792	-2.84809	0.00439821	0.122454	FALSE
HS3ST5	82.9748	0.867592	0.304674	2.8476	0.00440498	0.12249	FALSE
ECHDC1	1782.74	-0.436076	0.153185	-2.84673	0.00441708	0.122674	FALSE
CDC42EP2	244.521	0.907572	0.319038	2.84471	0.00444515	0.122843	FALSE
DCAF5	5320.2	-0.394598	0.138678	-2.84542	0.00443527	0.122843	FALSE
IRX5	22.9762	0.96542	0.339277	2.84552	0.00443392	0.122843	FALSE
MIR194-2HG	14.5539	0.975493	0.342883	2.84497	0.00444151	0.122843	FALSE
RCN2	7644.86	-0.362415	0.12745	-2.84358	0.00446097	0.123128	FALSE
TPST2	529.328	0.389103	0.136876	2.84275	0.00447267	0.123299	FALSE
PYCR1	1055.4	0.822905	0.289662	2.84091	0.00449848	0.123553	FALSE
SCAMP5	3123.82	0.444132	0.156305	2.84144	0.004491	0.123553	FALSE
UBE2Q2	1567.35	-0.352876	0.124198	-2.84124	0.00449378	0.123553	FALSE
TNS1	127.144	0.763223	0.268804	2.83933	0.00452082	0.124015	FALSE
ESRRA	421.252	0.49015	0.172683	2.83844	0.00453345	0.124209	FALSE
LRRC6	212.573	-0.518557	0.182748	-2.83755	0.00454607	0.124402	FALSE
EDN2	2.57329	1.32707	0.467802	2.83681	0.00455661	0.124538	FALSE
AGAP2-AS1	11.4446	1.01093	0.356779	2.83349	0.00460431	0.12477	FALSE
ARC	87.4369	1.11605	0.39369	2.83486	0.00458463	0.12477	FALSE
CAMKK2	1945.82	-0.435356	0.153589	-2.83455	0.00458905	0.12477	FALSE
CDK5R2	271.4	1.02339	0.361165	2.83359	0.00460289	0.12477	FALSE
CLN5	608.407	-0.402103	0.141965	-2.83241	0.00461985	0.12477	FALSE
HNRNPU	17754.9	-0.348354	0.122936	-2.83363	0.00460225	0.12477	FALSE
HS6ST2	1168.92	-0.701832	0.247619	-2.83433	0.00459225	0.12477	FALSE
IL22RA1	16.785	0.923667	0.326115	2.83234	0.00462089	0.12477	FALSE
RMST	27.1793	0.882328	0.311494	2.83257	0.00461752	0.12477	FALSE
RPRML	5.21333	1.2753	0.450009	2.83395	0.00459762	0.12477	FALSE
TOLLIP	1209.19	0.444873	0.157091	2.83194	0.00462659	0.124773	FALSE
LINC00540	18.2342	0.948103	0.334853	2.8314	0.00463449	0.124835	FALSE
CUX2	1073.36	-0.648015	0.228956	-2.8303	0.00465047	0.125103	FALSE
TEX11	91.6822	0.918976	0.324733	2.82994	0.00465564	0.125103	FALSE
AQP3	439.869	0.785334	0.277632	2.82869	0.00467392	0.125345	FALSE
C19orf66	107.857	0.701368	0.24796	2.82856	0.00467584	0.125345	FALSE
HES6	748.288	0.774077	0.273738	2.82781	0.00468681	0.125489	FALSE
CBX1	4548.43	-0.320052	0.113207	-2.82714	0.00469662	0.125601	FALSE
AP3B2	326.462	0.717458	0.253975	2.82492	0.00472931	0.125873	FALSE
EPO	16.3108	1.3022	0.460913	2.82525	0.00472433	0.125873	FALSE
HERPUD1	1591.49	0.282902	0.100105	2.82605	0.00471258	0.125873	FALSE
TLR4	2.8241	1.33995	0.474225	2.82555	0.00471991	0.125873	FALSE
CABYR	68.8615	0.535319	0.189694	2.82201	0.0047724	0.126268	FALSE
CNN1	1025.75	0.880655	0.312062	2.82205	0.00477178	0.126268	FALSE
CTPS2	2076.81	-0.254786	0.0902481	-2.82317	0.00475508	0.126268	FALSE
FAM57B	184.145	0.988913	0.350358	2.82257	0.00476398	0.126268	FALSE
SHMT2	2327.45	0.594931	0.210747	2.82295	0.00475833	0.126268	FALSE
AR	68.38	-0.607296	0.215493	-2.81817	0.00482979	0.127635	FALSE
ADORA2A-AS1	70.9777	0.795084	0.282696	2.8125	0.00491577	0.127949	FALSE
FBLL1	118.685	1.00663	0.357752	2.81377	0.00489637	0.127949	FALSE
GALNT2	5228.72	-0.429192	0.152581	-2.81288	0.00490998	0.127949	FALSE
GAS2L2	6.13692	1.12256	0.399135	2.81248	0.00491605	0.127949	FALSE
GBP2	10.7543	1.13824	0.404332	2.81512	0.00487589	0.127949	FALSE
HEPH	4499.81	-0.522092	0.185489	-2.81469	0.00488248	0.127949	FALSE
LAMA4	27.5414	1.10567	0.392549	2.81665	0.00485273	0.127949	FALSE
LIN7B	59.7472	0.860778	0.305888	2.81403	0.00489245	0.127949	FALSE
NTRK3	8.11985	1.07	0.380011	2.8157	0.00486705	0.127949	FALSE
PIBF1	642.938	-0.500694	0.177845	-2.81533	0.0048727	0.127949	FALSE
RP4-565E6.1	7.64082	1.23163	0.43789	2.81264	0.00491371	0.127949	FALSE
SFR1	98.0902	-0.49196	0.174707	-2.81591	0.00486397	0.127949	FALSE
UBLCP1	830.42	-0.462784	0.164428	-2.8145	0.00488528	0.127949	FALSE
FLT4	682.89	-0.561726	0.199964	-2.80913	0.00496755	0.128871	FALSE
LINC01507	2.24195	1.33506	0.47518	2.8096	0.00496034	0.128871	FALSE
RHBDL1	80.0395	0.627893	0.223525	2.80905	0.00496877	0.128871	FALSE
HBQ1	10.9671	1.30425	0.464487	2.80794	0.00498591	0.129016	FALSE
TMCC1	1318.59	-0.337068	0.120031	-2.80818	0.00498225	0.129016	FALSE
MON1A	122.116	0.739643	0.263774	2.80407	0.00504615	0.130424	FALSE
SAMD11	44.1573	0.760247	0.271194	2.80333	0.00505772	0.130572	FALSE
FGF8	9.09728	-1.08674	0.387914	-2.80149	0.00508677	0.131019	FALSE
PLA2G7	147.084	-0.651	0.232359	-2.8017	0.00508348	0.131019	FALSE
ACOT7	840.591	0.743621	0.265632	2.79944	0.00511913	0.131075	FALSE
ASCL1	162.489	1.01314	0.361923	2.79934	0.00512074	0.131075	FALSE
CDKN2D	93.485	0.748944	0.267564	2.79913	0.00512412	0.131075	FALSE
CHAC1	152.799	1.04038	0.37162	2.79958	0.00511686	0.131075	FALSE
FGG	1653.29	1.32569	0.473533	2.79957	0.00511709	0.131075	FALSE
SCG5	1056.12	0.69403	0.247887	2.79978	0.00511369	0.131075	FALSE
SH3GL3	35.0749	0.815798	0.291544	2.7982	0.00513886	0.131302	FALSE
SLC31A1	1426.74	-0.682878	0.244082	-2.79774	0.00514611	0.131337	FALSE
MPC1	279.65	0.538739	0.192601	2.79718	0.00515509	0.131417	FALSE
DNAJA3	1142.54	0.253674	0.0907688	2.79472	0.00519445	0.131741	FALSE
LINC00886	36.8519	-0.716461	0.25637	-2.79464	0.00519577	0.131741	FALSE
MECOM	3565.15	-0.700637	0.250724	-2.79445	0.00519875	0.131741	FALSE
OR5G5P	5.40062	-1.2609	0.451087	-2.79524	0.00518615	0.131741	FALSE
RP11-161M6.2	151.73	0.657459	0.235296	2.79418	0.00520316	0.131741	FALSE
STX1A	813.781	0.549806	0.196745	2.79451	0.00519787	0.131741	FALSE
ADM2	81.7523	0.963437	0.344858	2.79372	0.00521058	0.131779	FALSE
GIMAP4	5.67264	1.27324	0.455993	2.79224	0.00523445	0.132234	FALSE
FMR1	1875.26	-0.576209	0.206449	-2.79104	0.00525383	0.132458	FALSE
REST	2145.27	-0.676194	0.24228	-2.79096	0.0052552	0.132458	FALSE
RP11-71N10.1	2.96972	1.32272	0.474255	2.78905	0.00528627	0.133091	FALSE
RP11-284A20.2	3.55465	1.31268	0.470849	2.7879	0.00530506	0.133414	FALSE
IRX1	201.903	0.975787	0.350095	2.78721	0.00531645	0.13355	FALSE
FAM217A	7.17155	-0.968731	0.347644	-2.78656	0.00532703	0.133666	FALSE
SHC1	2251.16	0.263095	0.0944322	2.78607	0.00533517	0.13372	FALSE
RP11-595B24.1	13.4799	1.09532	0.393198	2.78566	0.00534194	0.13374	FALSE
SLX4IP	357.151	-0.593228	0.213069	-2.78421	0.00536577	0.134186	FALSE
KCNT1	5.89711	1.08001	0.388127	2.78261	0.0053924	0.134594	FALSE
RASL10B	438.616	0.597102	0.214592	2.7825	0.00539413	0.134594	FALSE
S100Z	76.9846	0.722156	0.259592	2.78189	0.00540437	0.134672	FALSE
ZBED3-AS1	113.78	-0.595114	0.213947	-2.78159	0.00540927	0.134672	FALSE
CHRNA3	69.3531	0.765506	0.275256	2.78107	0.00541798	0.134723	FALSE
SLC12A5	125.612	0.576685	0.207385	2.78075	0.00542339	0.134723	FALSE
CFAP58-AS1	4.38855	1.16421	0.418785	2.77996	0.00543648	0.134781	FALSE
RP11-99J16__A.2	12.3394	1.22906	0.44217	2.77961	0.0054424	0.134781	FALSE
SEC61A1	8557.37	0.23282	0.0837735	2.77917	0.00544985	0.134781	FALSE
TMEM191A	14.0926	1.10764	0.398549	2.77918	0.0054496	0.134781	FALSE
ABCB4	28.0058	0.739451	0.266117	2.77867	0.00545818	0.134838	FALSE
RP11-710C12.1	126.093	-0.674495	0.24281	-2.77788	0.00547155	0.135019	FALSE
EGR3	31.404	-1.06222	0.383137	-2.77242	0.00556408	0.13671	FALSE
INPP1	534.494	0.472564	0.170438	2.77264	0.00556029	0.13671	FALSE
MIA3	2745.09	-0.610967	0.220349	-2.77273	0.00555886	0.13671	FALSE
ST6GALNAC5	655.782	0.580219	0.209285	2.7724	0.00556454	0.13671	FALSE
CNRIP1	3.05247	1.30302	0.470232	2.77101	0.00558829	0.137143	FALSE
ABCG4	24.3132	0.734995	0.265346	2.76994	0.00560661	0.13744	FALSE
AUTS2	2263.76	-0.453369	0.163696	-2.76957	0.00561296	0.13744	FALSE
RP11-389J22.1	4.84104	-1.29429	0.46738	-2.76923	0.00561882	0.13744	FALSE
CCR7	3.41572	1.31589	0.475305	2.76852	0.0056311	0.13759	FALSE
BAALC-AS2	30.6851	1.12837	0.40795	2.76594	0.00567588	0.138174	FALSE
EPHB2	3038.67	-0.42717	0.154491	-2.76501	0.00569211	0.138174	FALSE
FSBP	12.1227	-0.954962	0.345337	-2.7653	0.00568699	0.138174	FALSE
SCG2	7318.34	0.926115	0.334911	2.76526	0.00568779	0.138174	FALSE
THY1	59.6498	1.15678	0.418336	2.76519	0.00568905	0.138174	FALSE
TMEM59L	127.018	0.74099	0.267967	2.76523	0.00568833	0.138174	FALSE
PTGFRN	1795.99	-0.455216	0.164685	-2.76416	0.00570692	0.138384	FALSE
EMILIN1	35.9073	1.00238	0.363039	2.76108	0.00576104	0.139482	FALSE
KDELC2	1080.9	-0.608848	0.220527	-2.76087	0.0057647	0.139482	FALSE
CD99L2	819.825	0.391856	0.141979	2.75995	0.00578098	0.139577	FALSE
LAMP5	22.9496	0.989698	0.358594	2.75994	0.00578111	0.139577	FALSE
CAPN9	286.333	-0.608799	0.220639	-2.75925	0.00579342	0.139603	FALSE
CEP135	389.075	-0.733103	0.265696	-2.75918	0.00579469	0.139603	FALSE
HTRA1	208.359	0.752722	0.272895	2.75828	0.00581066	0.139676	FALSE
NPTX2	17.3223	0.96985	0.351723	2.75743	0.00582581	0.139676	FALSE
OAF	227.153	0.777271	0.281811	2.75813	0.00581336	0.139676	FALSE
SESN2	739.603	0.555941	0.201591	2.75777	0.00581968	0.139676	FALSE
TMEM184A	532.619	0.479814	0.174019	2.75725	0.00582896	0.139676	FALSE
CAMK2B	603.202	0.517942	0.187915	2.75627	0.00584656	0.139792	FALSE
IGSF5	16.9431	0.662246	0.240263	2.75634	0.00584521	0.139792	FALSE
LMO3	2356.66	-0.589956	0.214068	-2.75593	0.00585253	0.139792	FALSE
SOX3	513.945	0.995368	0.361321	2.75481	0.00587269	0.140123	FALSE
TMIE	2.67747	1.24133	0.450738	2.754	0.00588718	0.14032	FALSE
L3MBTL3	960.787	-0.538397	0.195543	-2.75334	0.00589908	0.140453	FALSE
COMTD1	162.842	1.03782	0.377074	2.75231	0.00591767	0.140596	FALSE
GADD45G	280.637	0.956779	0.347594	2.75258	0.00591285	0.140596	FALSE
CDCP1	1577.73	-0.533212	0.193995	-2.74859	0.00598524	0.140848	FALSE
CLPSL1	3.35728	1.19998	0.436436	2.74949	0.00596876	0.140848	FALSE
CTD-2281M20.1	10.5379	1.00288	0.364793	2.74919	0.00597432	0.140848	FALSE
KANK3	65.8629	0.857897	0.311948	2.75013	0.00595717	0.140848	FALSE
MESP1	15.1359	1.19129	0.43333	2.74914	0.0059751	0.140848	FALSE
PRDM14	15.329	0.992912	0.360994	2.75049	0.00595053	0.140848	FALSE
RFLNB	398.203	0.714262	0.259882	2.74841	0.00598843	0.140848	FALSE
RP11-319G6.1	100.414	-0.365308	0.132906	-2.74862	0.00598467	0.140848	FALSE
SLC15A3	156.253	0.914624	0.332801	2.74826	0.00599123	0.140848	FALSE
SNAP25	301.337	0.838746	0.304978	2.75018	0.00595618	0.140848	FALSE
NEK10	52.3204	-0.731021	0.266154	-2.74661	0.00602144	0.141262	FALSE
ORMDL3	4349.83	0.417273	0.151923	2.74661	0.00602148	0.141262	FALSE
TBX22	15.006	-0.880619	0.320668	-2.7462	0.00602898	0.141289	FALSE
TRABD2A	59.6564	-0.824201	0.300173	-2.74575	0.00603723	0.141334	FALSE
SLCO4C1	110.777	-0.761754	0.277541	-2.74465	0.00605756	0.141662	FALSE
ISL1	895.08	0.669706	0.244067	2.74394	0.00607064	0.141819	FALSE
TTC22	20.1233	0.855727	0.311905	2.74355	0.00607779	0.141838	FALSE
ACTN3	124.832	0.885826	0.323035	2.7422	0.00610295	0.142018	FALSE
FOXP3	31.103	0.936645	0.341574	2.74215	0.00610392	0.142018	FALSE
PLEKHG4B	1940.75	-0.4784	0.174486	-2.74177	0.0061109	0.142018	FALSE
PTPRD-AS1	66.6611	-0.464267	0.169325	-2.74187	0.00610902	0.142018	FALSE
CLDN10	84.6312	0.658049	0.240077	2.741	0.00612534	0.142206	FALSE
ASGR2	294.396	0.935959	0.341538	2.74043	0.00613593	0.142304	FALSE
GPX8	1343.47	-0.429081	0.156636	-2.73934	0.00615619	0.142626	FALSE
SCFD2	192.501	0.374156	0.136623	2.73861	0.00617001	0.14265	FALSE
SHD	82.5481	0.767077	0.280086	2.73871	0.00616798	0.14265	FALSE
AC013463.2	32.4943	0.926646	0.338417	2.73818	0.00617807	0.142689	FALSE
CHST1	22.5884	1.2102	0.442182	2.73689	0.00620226	0.142805	FALSE
SUSD5	100.642	-0.831317	0.303732	-2.73701	0.00620012	0.142805	FALSE
TIPARP	1685.32	-0.671039	0.245132	-2.73746	0.00619149	0.142805	FALSE
USH2A	50.4386	1.01562	0.371476	2.73403	0.00625651	0.143906	FALSE
MARVELD3	738.63	-0.40733	0.149143	-2.73113	0.00631167	0.144981	FALSE
THEMIS2	90.7069	0.625642	0.229098	2.7309	0.0063162	0.144981	FALSE
CD248	71.3606	1.1567	0.423704	2.72997	0.00633408	0.145242	FALSE
FAM181B	535.079	0.537672	0.197038	2.72877	0.00635716	0.145622	FALSE
LYPD6	1539.98	-0.40029	0.146788	-2.727	0.00639123	0.146252	FALSE
SPRN	20.6842	0.938938	0.344521	2.72534	0.00642346	0.14684	FALSE
CDC42EP5	42.5346	1.07696	0.395585	2.72244	0.00648011	0.14782	FALSE
GUSBP1	245.827	0.649402	0.238564	2.72213	0.00648618	0.14782	FALSE
PPP2R3A	1734.55	-0.574218	0.210937	-2.72222	0.00648443	0.14782	FALSE
RP11-762L8.6	24.5626	0.941714	0.34608	2.72109	0.00650676	0.148138	FALSE
RP3-326L13.2	11.572	0.977452	0.359276	2.72061	0.00651609	0.1482	FALSE
RP11-334J6.7	9.45354	0.851576	0.313352	2.71764	0.00657501	0.149236	FALSE
ZNF600	227.411	-0.392552	0.144438	-2.7178	0.00657184	0.149236	FALSE
MYL4	71.5021	0.869029	0.319905	2.71653	0.00659712	0.149434	FALSE
PLOD2	3123.39	-0.807341	0.297186	-2.71662	0.0065953	0.149434	FALSE
SNAI1	82.6269	0.763279	0.281176	2.7146	0.00663563	0.150155	FALSE
SHISA2	243.129	0.708725	0.261112	2.71425	0.00664253	0.150159	FALSE
HPCA	283.163	0.956473	0.352744	2.71152	0.00669747	0.151248	FALSE
IL23A	219.27	0.63711	0.235054	2.71048	0.0067185	0.15157	FALSE
GRIN2D	35.3738	0.73215	0.270273	2.70892	0.00675017	0.151977	FALSE
LINC00907	51.1547	0.754283	0.278415	2.70921	0.00674441	0.151977	FALSE
CELF3	1192.09	0.64243	0.237381	2.70632	0.00680333	0.15302	FALSE
ANKRD18B	21.6347	1.03883	0.383993	2.70533	0.00682374	0.153171	FALSE
USH1C	417.855	0.807195	0.298347	2.70556	0.00681893	0.153171	FALSE
CCDC30	475.448	-0.523295	0.193519	-2.70411	0.00684877	0.153303	FALSE
NID1	3014.46	-0.707833	0.261769	-2.70404	0.0068502	0.153303	FALSE
PXYLP1	892.7	-0.393935	0.145661	-2.70446	0.0068415	0.153303	FALSE
EMP3	310.795	0.842933	0.311979	2.70189	0.00689461	0.153989	FALSE
GS1-124K5.4	43.1123	0.915536	0.338824	2.7021	0.00689026	0.153989	FALSE
NXPH4	33.8064	0.953866	0.353151	2.70101	0.00691283	0.153993	FALSE
ROGDI	1133.38	0.780106	0.288809	2.70111	0.00691076	0.153993	FALSE
ZNF90	146.661	-0.537939	0.199171	-2.70089	0.00691547	0.153993	FALSE
GRHL2	1435.79	-0.426054	0.157786	-2.7002	0.00692977	0.154085	FALSE
HS3ST4	144.61	0.663359	0.245686	2.70003	0.00693336	0.154085	FALSE
AC007325.4	6.85685	1.05966	0.392754	2.69803	0.00697517	0.15486	FALSE
MAML2	716.884	-0.643189	0.238486	-2.69697	0.00699741	0.155126	FALSE
MYO7A	60.7139	0.628985	0.233234	2.69679	0.00700105	0.155126	FALSE
MUC3A	106.841	0.768311	0.28498	2.69601	0.00701747	0.155336	FALSE
BOK	407.52	0.672748	0.249682	2.69442	0.00705106	0.155891	FALSE
MEIS2	1734.01	-0.275567	0.102283	-2.69417	0.00705648	0.155891	FALSE
MAATS1	2708.86	-0.588386	0.218626	-2.69129	0.00711762	0.157086	FALSE
HOXA5	40.7694	-1.22648	0.455926	-2.69009	0.00714326	0.157497	FALSE
ARSB	639.599	-0.559328	0.207979	-2.68934	0.00715933	0.157542	FALSE
FAT4	262.47	-1.0028	0.372878	-2.68934	0.0071594	0.157542	FALSE
ARHGAP6	225.707	0.555648	0.206739	2.68767	0.00719516	0.158093	FALSE
OXCT1	818.219	-0.417656	0.155425	-2.68719	0.00720563	0.158093	FALSE
PDE1A	33.9213	0.75544	0.28111	2.68735	0.0072021	0.158093	FALSE
FAM71F1	11.8222	1.09694	0.408428	2.68575	0.00723663	0.158617	FALSE
ALDH5A1	455.913	-0.429369	0.159974	-2.684	0.00727476	0.158869	FALSE
EPS8L3	72.0478	0.791758	0.295001	2.68392	0.00727655	0.158869	FALSE
PAQR5	285.577	-0.671415	0.250149	-2.68407	0.00727329	0.158869	FALSE
PRKACB	2819.35	-0.568377	0.211769	-2.68395	0.00727578	0.158869	FALSE
IRX3	64.1121	0.991277	0.369474	2.68294	0.00729778	0.159022	FALSE
PCM1	6199.28	-0.472966	0.17628	-2.68303	0.00729574	0.159022	FALSE
RP11-81A22.5	6.51428	1.223	0.455929	2.68243	0.00730901	0.159112	FALSE
GMFG	6.08182	1.21611	0.453618	2.68091	0.0073422	0.159352	FALSE
GRIN2C	4.43501	1.23709	0.461445	2.6809	0.00734234	0.159352	FALSE
GRM4	266.058	0.662525	0.247107	2.68113	0.00733749	0.159352	FALSE
TTC39A	634.948	0.419286	0.156414	2.68062	0.00734855	0.159352	FALSE
TMEM61	15.0354	1.13114	0.422085	2.67989	0.00736462	0.159545	FALSE
MANEAL	325.306	0.702366	0.262238	2.67835	0.00739848	0.160124	FALSE
EDN1	229.224	0.694283	0.259307	2.67745	0.00741846	0.160131	FALSE
HCST	13.987	1.06814	0.398985	2.67715	0.00742524	0.160131	FALSE
RAB3IP	1620.71	-0.282173	0.10539	-2.67743	0.00741896	0.160131	FALSE
RBFA	255.195	0.445606	0.166454	2.67705	0.00742745	0.160131	FALSE
CD4	35.3131	0.937886	0.350568	2.67533	0.00746553	0.160716	FALSE
SMPD3	164.542	0.743062	0.277795	2.67486	0.00747615	0.160716	FALSE
TNP1	6.29603	1.14502	0.428051	2.67495	0.00747404	0.160716	FALSE
PCDHGB6	1034.02	-0.716613	0.267983	-2.6741	0.00749302	0.160924	FALSE
SECTM1	5.51786	1.15178	0.4309	2.67296	0.00751851	0.161316	FALSE
SCLT1	290.187	-0.32804	0.122743	-2.67258	0.00752713	0.161346	FALSE
SOX2	1742.55	-0.793983	0.297275	-2.67087	0.00756545	0.16159	FALSE
ST3GAL3	209.479	0.636021	0.238057	2.67172	0.00754643	0.16159	FALSE
SYNDIG1	28.6192	-0.699378	0.261811	-2.67131	0.00755552	0.16159	FALSE
UBXN2B	1111.34	-0.434239	0.162588	-2.67078	0.00756741	0.16159	FALSE
SPON1	849.467	-0.717485	0.268737	-2.66985	0.00758859	0.161888	FALSE
DTX4	1835.75	-0.294702	0.110441	-2.66842	0.00762089	0.162357	FALSE
MGLL	40.2125	0.870592	0.32628	2.66823	0.00762512	0.162357	FALSE
ANXA3	4973.88	-0.403086	0.15113	-2.66715	0.00764968	0.162725	FALSE
LYPD6B	3450.09	-0.454541	0.170503	-2.66588	0.00767864	0.162829	FALSE
MSR1	21.4225	0.909849	0.34129	2.66591	0.00767805	0.162829	FALSE
RP11-366L20.2	76.0832	-0.804638	0.301881	-2.66541	0.00768939	0.162829	FALSE
RP11-54O7.17	155.991	-0.899082	0.337221	-2.66615	0.00767255	0.162829	FALSE
SULT1C4	724.339	-0.667773	0.250539	-2.66534	0.00769097	0.162829	FALSE
SAMD3	58.443	0.598536	0.224902	2.66132	0.00778342	0.16463	FALSE
APOL6	5.74565	1.15191	0.433016	2.6602	0.0078095	0.165025	FALSE
CHRNA4	42.2159	0.919573	0.345822	2.65909	0.00783513	0.165411	FALSE
SLC25A4	937.77	0.438575	0.165022	2.65767	0.00786822	0.165681	FALSE
TRPS1	241.49	-0.580295	0.218302	-2.65822	0.00785546	0.165681	FALSE
UG0898H09	48.035	-0.790467	0.297437	-2.65759	0.00787014	0.165681	FALSE
DOCK1	1371.66	-0.493589	0.185786	-2.65677	0.00788933	0.165862	FALSE
TMEM123	9184.96	-0.59495	0.223953	-2.65659	0.00789359	0.165862	FALSE
CCDC53	163.542	0.527525	0.198603	2.65618	0.00790319	0.165908	FALSE
DGKI	185.293	0.983022	0.370571	2.65272	0.00798453	0.167159	FALSE
LINC00643	712.261	0.957424	0.360887	2.65298	0.00797857	0.167159	FALSE
LRRC37B	277.051	-0.304417	0.114758	-2.65269	0.00798521	0.167159	FALSE
ASTL	2.57658	-1.1502	0.433878	-2.65097	0.00802611	0.167858	FALSE
CTD-2382E5.6	7.17593	-1.22626	0.462895	-2.64911	0.00807031	0.168467	FALSE
NAALADL1	64.3033	0.757989	0.286109	2.64931	0.00806571	0.168467	FALSE
KIF11	1066.57	-0.480419	0.181385	-2.64861	0.00808228	0.168559	FALSE
LGALS2	101.08	1.10381	0.417117	2.64628	0.0081382	0.169409	FALSE
TLL1	139.614	-0.825515	0.311944	-2.64636	0.0081364	0.169409	FALSE
EFEMP1	2110.26	-0.60793	0.229885	-2.64449	0.00818132	0.170057	FALSE
RPL37P6	13.9666	1.25216	0.473519	2.64436	0.00818452	0.170057	FALSE
MVD	949.476	0.729043	0.275832	2.64307	0.0082157	0.170388	FALSE
WNT4	177.863	0.705211	0.266791	2.64331	0.00821002	0.170388	FALSE
TRHDE	138.463	-0.709698	0.268583	-2.64238	0.00823259	0.17058	FALSE
HELZ2	494.384	0.358471	0.135692	2.6418	0.00824662	0.170713	FALSE
IL34	7.7014	1.11223	0.421248	2.64032	0.00828269	0.171142	FALSE
TSPAN5	823.983	0.375599	0.142245	2.64052	0.00827795	0.171142	FALSE
POU2AF1	6.8464	1.14312	0.433047	2.6397	0.00829792	0.171299	FALSE
CDC25B	1029.44	0.422457	0.160176	2.63746	0.00835298	0.171709	FALSE
PLPP7	33.0614	0.827804	0.313746	2.63845	0.00832858	0.171709	FALSE
S100A14	957.344	1.25104	0.474359	2.63733	0.00835618	0.171709	FALSE
TTYH2	273.875	0.5516	0.20912	2.63772	0.00834663	0.171709	FALSE
TXNRD2	32.4675	0.898837	0.340778	2.63761	0.00834938	0.171709	FALSE
PDE4C	47.8893	0.93669	0.35549	2.63493	0.00841552	0.172769	FALSE
CRMP1	2091.17	0.664414	0.252209	2.63438	0.00842912	0.17289	FALSE
HIST3H2BB	28.3589	-1.12372	0.426675	-2.63368	0.00844662	0.172931	FALSE
LINC01586	8.4583	0.921382	0.349811	2.63394	0.00844007	0.172931	FALSE
MPP1	252.583	0.440299	0.167253	2.63254	0.00847501	0.173354	FALSE
CERKL	207.05	0.741635	0.281778	2.63198	0.00848891	0.173479	FALSE
RP3-523K23.2	155.886	-0.614381	0.233704	-2.62888	0.00856658	0.174747	FALSE
TCTN2	1012.07	-0.494828	0.188208	-2.62915	0.00855975	0.174747	FALSE
ST8SIA1	19.1743	0.669539	0.254748	2.62824	0.0085828	0.174918	FALSE
GRAMD3	641.157	-0.347332	0.132185	-2.62763	0.00859819	0.174995	FALSE
MYH13	4.58774	1.19385	0.454374	2.62747	0.00860222	0.174995	FALSE
HHAT	387.139	-0.412615	0.157073	-2.6269	0.00861661	0.175129	FALSE
MAST4	2165.51	-0.589248	0.224491	-2.62482	0.00866956	0.175726	FALSE
RTN3	5997.65	-0.321499	0.122466	-2.62522	0.00865935	0.175726	FALSE
THSD4	2801.06	0.891618	0.339668	2.62497	0.00866573	0.175726	FALSE
RP11-715J22.6	100.112	0.553312	0.210938	2.6231	0.0087133	0.176452	FALSE
LRRC56	250.191	0.527451	0.201141	2.62229	0.00873407	0.176713	FALSE
LMOD1	116.005	0.904858	0.345108	2.62196	0.00874262	0.176726	FALSE
CCR10	17.8414	1.08348	0.41329	2.6216	0.0087519	0.176754	FALSE
IL10RA	96.3853	0.732123	0.27963	2.61819	0.00883982	0.178368	FALSE
CBX3P9	14.4442	-0.837015	0.319752	-2.6177	0.00885234	0.178406	FALSE
DPYD	177.429	-0.599619	0.229081	-2.6175	0.00885765	0.178406	FALSE
USP49	766.758	-0.52754	0.201678	-2.61576	0.00890292	0.179156	FALSE
KCNN4	26.3186	1.09065	0.417137	2.6146	0.00893312	0.179602	FALSE
DIRAS1	333.716	0.546978	0.20928	2.61362	0.00895888	0.179958	FALSE
ACAT1	698.922	0.501397	0.191944	2.6122	0.00899614	0.180383	FALSE
MYLIP	1803.09	-0.468098	0.179188	-2.61232	0.00899295	0.180383	FALSE
FOXN4	5.17515	1.12585	0.431064	2.6118	0.00900672	0.180433	FALSE
EFCAB1	99.4864	0.729287	0.279407	2.61013	0.00905081	0.181033	FALSE
TRABD2B	1408.1	-0.543431	0.208231	-2.60975	0.00906089	0.181033	FALSE
ZNF85	399.887	-0.468562	0.179543	-2.60975	0.00906094	0.181033	FALSE
TMEM196	372.835	0.69896	0.267888	2.60915	0.00907664	0.181184	FALSE
BRINP2	56.1139	0.647085	0.248425	2.60475	0.00919416	0.181305	FALSE
CCDC15	90.1853	-0.521457	0.200124	-2.60568	0.00916933	0.181305	FALSE
DMC1	20.0944	-0.722432	0.27734	-2.60486	0.00919121	0.181305	FALSE
ICAM3	67.9687	0.880479	0.338038	2.60467	0.00919621	0.181305	FALSE
MAPK12	872.995	0.537559	0.206343	2.60518	0.00918271	0.181305	FALSE
MIAT	319.306	0.901783	0.346014	2.60621	0.00915515	0.181305	FALSE
MYBBP1A	884.432	0.382257	0.146631	2.60693	0.00913572	0.181305	FALSE
SLC18A3	35.5369	1.10716	0.424977	2.60522	0.00918141	0.181305	FALSE
SLC27A5	96.226	0.817567	0.313511	2.60777	0.00911332	0.181305	FALSE
SLIT2	233.156	-0.647377	0.248287	-2.60738	0.00912393	0.181305	FALSE
SRBD1	513.135	-0.392044	0.150477	-2.60535	0.00917803	0.181305	FALSE
SWAP70	881.458	-0.443593	0.170226	-2.6059	0.00916323	0.181305	FALSE
TM7SF3	1177.78	-0.414277	0.15889	-2.60731	0.00912555	0.181305	FALSE
VEZT	3377.84	-0.377126	0.144592	-2.60821	0.00910183	0.181305	FALSE
HCAR3	3.2554	1.2344	0.474125	2.60354	0.00922664	0.18174	FALSE
MMP26	14.2844	-0.834738	0.320653	-2.60325	0.00923456	0.18174	FALSE
MPZL1	4397.16	-0.331266	0.127278	-2.60271	0.0092491	0.181866	FALSE
TBC1D2	324.332	0.551559	0.212033	2.60129	0.00928744	0.1823	FALSE
TNFRSF1B	9.09378	1.20388	0.46278	2.6014	0.00928434	0.1823	FALSE
RNA5SP111	6.25142	0.961084	0.369552	2.60068	0.00930402	0.182465	FALSE
NEURL1	1347.04	0.551	0.211957	2.59959	0.00933353	0.182883	FALSE
CCDC69	272.824	0.506431	0.194932	2.59799	0.00937722	0.183043	FALSE
FAM83H-AS1	257.266	-0.404092	0.155538	-2.59803	0.00937607	0.183043	FALSE
MYO1G	23.6686	0.836932	0.322045	2.5988	0.00935491	0.183043	FALSE
RBM41	476.959	-0.578771	0.222794	-2.59779	0.0093826	0.183043	FALSE
RP11-563K23.1	7.93727	0.916138	0.352567	2.59848	0.00936371	0.183043	FALSE
COX17	447.316	0.596886	0.229854	2.5968	0.00940954	0.183101	FALSE
GPR37L1	20.888	0.762032	0.293392	2.59732	0.00939543	0.183101	FALSE
NFS1	211.877	0.328406	0.126466	2.59678	0.00941015	0.183101	FALSE
LAMB4	7.32193	1.05878	0.407884	2.59579	0.00943744	0.183248	FALSE
LAPTM4A	10572.2	-0.334197	0.128769	-2.59531	0.00945049	0.183248	FALSE
SOX21	2060.86	-0.581201	0.223937	-2.59538	0.00944861	0.183248	FALSE
VWA5B2	2757.16	0.655746	0.252656	2.59541	0.0094477	0.183248	FALSE
ANTXR1	2616.36	-0.689655	0.26582	-2.59444	0.00947458	0.183409	FALSE
BIK	253.967	0.848755	0.327343	2.59286	0.00951802	0.183409	FALSE
BLOC1S5	591.395	-0.346139	0.133502	-2.59277	0.00952066	0.183409	FALSE
C19orf12	873.404	0.307179	0.118586	2.59035	0.00958781	0.183409	FALSE
C19orf81	54.7479	1.15312	0.444885	2.59196	0.00954321	0.183409	FALSE
FFAR1	25.7774	0.914762	0.353234	2.58967	0.00960667	0.183409	FALSE
GDI1	5375.01	0.404773	0.156203	2.59133	0.00956065	0.183409	FALSE
GPRC5A	249.368	0.907656	0.35015	2.5922	0.00953655	0.183409	FALSE
IL13RA1	1037.42	-0.5242	0.20229	-2.59133	0.00956052	0.183409	FALSE
KIAA0319L	2874.06	-0.371458	0.14332	-2.59181	0.00954713	0.183409	FALSE
LINC00880	4.29256	1.10452	0.426399	2.59034	0.00958804	0.183409	FALSE
MGAT5B	73.0649	0.630119	0.243325	2.58962	0.00960827	0.183409	FALSE
PDE4DIP	476.839	0.499215	0.192544	2.59273	0.00952188	0.183409	FALSE
PLCE1	1316.4	-0.489935	0.188967	-2.5927	0.00952252	0.183409	FALSE
RIMS4	707.852	-0.79472	0.306853	-2.5899	0.00960033	0.183409	FALSE
RP11-131M11.2	7.95925	0.818155	0.315482	2.59335	0.00950458	0.183409	FALSE
TPP1	2289.32	-0.418648	0.161423	-2.59348	0.00950097	0.183409	FALSE
ZNF738	1045.67	-0.534722	0.206468	-2.58985	0.00960169	0.183409	FALSE
ZNF77	173.335	0.493567	0.190611	2.58939	0.00961468	0.183409	FALSE
DLL1	5689.03	-0.49852	0.192614	-2.58818	0.00964843	0.183765	FALSE
SHISA4	69.2808	0.91361	0.353	2.58813	0.00964976	0.183765	FALSE
COL22A1	896.837	-0.64875	0.25078	-2.58693	0.00968353	0.183938	FALSE
HNRNPA2B1	32572.2	-0.376992	0.145698	-2.5875	0.00966761	0.183938	FALSE
TLN1	6470.65	0.331803	0.128251	2.58713	0.00967785	0.183938	FALSE
CORO2B	379.709	0.816095	0.315746	2.58466	0.00974762	0.184841	FALSE
SMLR1	81.6148	0.888142	0.343609	2.58475	0.00974503	0.184841	FALSE
RP11-359E10.1	6.55879	1.06431	0.412032	2.58309	0.00979208	0.185527	FALSE
HIST1H4H	39.8552	-0.588719	0.228004	-2.58205	0.0098214	0.185767	FALSE
MAOA	1918.12	-0.359795	0.139343	-2.58208	0.00982054	0.185767	FALSE
LL22NC03-24A12.9	9.58045	1.21779	0.471843	2.58093	0.0098534	0.186108	FALSE
TTC39A-AS1	22.1077	0.905095	0.350698	2.58084	0.00985607	0.186108	FALSE
IHH	829.511	1.01566	0.393644	2.58015	0.00987569	0.18627	FALSE
SDC2	2146.02	-0.388516	0.15059	-2.57996	0.00988128	0.18627	FALSE
AC097468.4	77.2979	0.626446	0.243179	2.57606	0.00999322	0.187123	FALSE
BRCC3	627.777	-0.534404	0.207361	-2.57716	0.0099615	0.187123	FALSE
C1QA	3.41333	-1.18039	0.458116	-2.57662	0.00997711	0.187123	FALSE
CDX1	5.45286	1.21602	0.47205	2.57605	0.00999353	0.187123	FALSE
FOXO3	1202.43	-0.677819	0.263115	-2.57614	0.00999116	0.187123	FALSE
LSM14A	3478.67	-0.398441	0.15458	-2.57757	0.00994989	0.187123	FALSE
RPL3L	2.71458	1.1974	0.464645	2.57702	0.0099657	0.187123	FALSE
UST	140.409	-0.610923	0.237092	-2.57674	0.00997378	0.187123	FALSE
C2CD4B	41.5778	0.953983	0.370399	2.57555	0.010008	0.187237	FALSE
IQUB	127.661	-0.749072	0.29093	-2.57475	0.0100313	0.187445	FALSE
ZNF439	27.6745	1.15564	0.448864	2.57459	0.0100359	0.187445	FALSE
AJAP1	19.3852	0.817193	0.317782	2.57156	0.0101243	0.187963	FALSE
EGF	14.5548	0.984283	0.382774	2.57145	0.0101275	0.187963	FALSE
FAM221A	465.864	-0.577938	0.224764	-2.57131	0.0101314	0.187963	FALSE
GPR4	4.34112	1.21012	0.470396	2.57256	0.0100949	0.187963	FALSE
LRRC4B	349.781	0.927617	0.360786	2.5711	0.0101376	0.187963	FALSE
NOP16	330.866	0.508387	0.197755	2.5708	0.0101465	0.187963	FALSE
RP11-282O18.3	110.956	-0.762319	0.296328	-2.57255	0.0100952	0.187963	FALSE
SORT1	6484.62	-0.509916	0.198352	-2.57076	0.0101476	0.187963	FALSE
SPIB	92.9442	-1.02916	0.400278	-2.57112	0.0101371	0.187963	FALSE
TCF7L2	2081	-0.44408	0.172737	-2.57084	0.0101453	0.187963	FALSE
HIC1	23.7396	0.860112	0.334737	2.56952	0.010184	0.188436	FALSE
KCND2	39.2826	-0.837045	0.325786	-2.56931	0.01019	0.188436	FALSE
RAD51B	91.6824	-0.502857	0.195772	-2.56859	0.0102113	0.188673	FALSE
LINC00964	46.1475	-1.08201	0.421296	-2.56829	0.0102202	0.18868	FALSE
SRM	830.794	0.827196	0.322488	2.56505	0.0103162	0.19014	FALSE
TTC30B	472.183	-0.427763	0.166752	-2.56527	0.0103096	0.19014	FALSE
CHRNB4	99.7748	0.84265	0.329041	2.56092	0.0104394	0.192094	FALSE
TUSC1	250.282	0.628417	0.245377	2.56103	0.0104364	0.192094	FALSE
DUBR	215.424	-0.525891	0.205386	-2.5605	0.0104522	0.192171	FALSE
AANAT	3.92205	1.13588	0.443675	2.56017	0.010462	0.192194	FALSE
GLTPD2	108.726	0.935191	0.36554	2.55838	0.0105161	0.193028	FALSE
NRGN	78.6008	1.05134	0.411174	2.55693	0.01056	0.193676	FALSE
USP44	210.304	-0.468305	0.183204	-2.55619	0.0105825	0.193929	FALSE
KIAA1958	1373.97	-0.568432	0.222413	-2.55575	0.010596	0.193938	FALSE
OSMR	157.604	0.775646	0.303508	2.5556	0.0106003	0.193938	FALSE
FAM151B	31.6728	-0.659104	0.257941	-2.55525	0.010611	0.193975	FALSE
TMEM47	1477.67	-0.699395	0.273747	-2.55489	0.010622	0.194017	FALSE
AP001258.4	192.638	-0.59405	0.232595	-2.55401	0.0106489	0.194075	FALSE
CRIP2	515.273	0.763277	0.298808	2.5544	0.010637	0.194075	FALSE
SPG20	1614.82	-0.54043	0.211607	-2.55394	0.0106513	0.194075	FALSE
CYP1A1	23.3336	1.03005	0.403413	2.55334	0.0106695	0.194249	FALSE
GALNT10	933.218	-0.586891	0.229883	-2.553	0.0106799	0.19428	FALSE
RP11-284F21.10	84.776	0.543791	0.213052	2.55239	0.0106987	0.194464	FALSE
FDFT1	2986.96	0.407453	0.159719	2.55106	0.0107394	0.195004	FALSE
REXO2	716.203	0.375228	0.147125	2.55041	0.0107597	0.195004	FALSE
TUBB1	21.8781	1.02923	0.403525	2.55061	0.0107536	0.195004	FALSE
WDR31	259.057	-0.535566	0.210002	-2.55029	0.0107633	0.195004	FALSE
AC009014.3	195.287	0.767361	0.301014	2.54926	0.0107953	0.195267	FALSE
GABRA1	17.3402	-0.865824	0.339617	-2.54941	0.0107905	0.195267	FALSE
SHISA7	24.2328	0.830141	0.325827	2.5478	0.0108406	0.195928	FALSE
ADAMTS2	164.535	0.755979	0.296759	2.54745	0.0108513	0.195964	FALSE
IFT74	749.957	-0.378325	0.148544	-2.5469	0.0108686	0.195981	FALSE
MAT1A	56.3037	1.09593	0.430308	2.54686	0.0108698	0.195981	FALSE
CLMP	116.263	0.650995	0.255791	2.54503	0.0109269	0.196693	FALSE
TRMT2B	346.918	-0.253871	0.099748	-2.54512	0.0109239	0.196693	FALSE
RNF20	1706.93	-0.28067	0.110316	-2.54423	0.0109518	0.196983	FALSE
PTPN3	292.576	0.557912	0.219327	2.54375	0.010967	0.197098	FALSE
SLC43A3	163.148	0.547816	0.215404	2.5432	0.0109842	0.197247	FALSE
DOCK11	375.109	-0.57285	0.225393	-2.54156	0.0110359	0.197545	FALSE
RP11-660L16.2	40.0936	0.825731	0.324892	2.54155	0.0110361	0.197545	FALSE
SDR42E2	3.15048	-1.1361	0.446969	-2.54178	0.0110288	0.197545	FALSE
SRPX2	19.9531	1.03833	0.408532	2.5416	0.0110346	0.197545	FALSE
PTRF	608.751	0.688558	0.271077	2.54008	0.0110827	0.19822	FALSE
FAM212A	6.59256	1.17831	0.463974	2.53961	0.0110976	0.198329	FALSE
HHIPL2	13.1322	-0.780576	0.307443	-2.53893	0.0111193	0.198558	FALSE
RNF112	16.4155	0.782509	0.308441	2.53698	0.0111814	0.199507	FALSE
AIFM3	42.8402	0.676006	0.26653	2.53632	0.0112024	0.199563	FALSE
LINC00894	105.441	-0.822691	0.324357	-2.53637	0.0112008	0.199563	FALSE
ANP32A	6063.41	-0.302179	0.119156	-2.53601	0.0112125	0.199584	FALSE
NAF1	571.547	-0.484627	0.191155	-2.53526	0.0112365	0.199693	FALSE
STRBP	2006.06	-0.328212	0.12945	-2.53543	0.0112308	0.199693	FALSE
ADGRA1	101.243	0.746271	0.294595	2.53321	0.0113022	0.199771	FALSE
CDHR1	23.6959	0.782049	0.308792	2.53261	0.0113218	0.199771	FALSE
GNA14	22.2102	-0.734002	0.289799	-2.5328	0.0113156	0.199771	FALSE
KRT15	166.769	0.592511	0.233901	2.53317	0.0113035	0.199771	FALSE
LINC00634	11.6287	1.02299	0.403803	2.5334	0.0112962	0.199771	FALSE
PAMR1	48.82	1.0074	0.397648	2.53341	0.0112959	0.199771	FALSE
RP11-410N8.3	4.55005	1.07942	0.426178	2.53279	0.0113158	0.199771	FALSE
RP11-760H22.2	95.2064	-0.736985	0.290877	-2.53366	0.0112877	0.199771	FALSE
TMEM51	729.202	0.350039	0.138122	2.53428	0.0112678	0.199771	FALSE
ZNF350	116.3	-0.316741	0.125078	-2.53235	0.0113302	0.199771	FALSE
NXPH2	191.145	-0.781505	0.308773	-2.531	0.0113737	0.200379	FALSE
C11orf24	891.976	0.533991	0.211068	2.52994	0.0114081	0.20044	FALSE
CISD3	92.6627	0.842121	0.332914	2.52955	0.011421	0.20044	FALSE
CTB-118P15.2	77.7165	0.915644	0.361983	2.52952	0.0114219	0.20044	FALSE
STAB1	32.3261	0.6968	0.275358	2.53052	0.0113893	0.20044	FALSE
TCTN3	1956.39	-0.298735	0.118093	-2.52966	0.0114172	0.20044	FALSE
BMPR2	1475.87	-0.663085	0.262323	-2.52775	0.0114797	0.201239	FALSE
TXN	1479.05	0.584092	0.231088	2.52757	0.0114855	0.201239	FALSE
SMAD3	2354.6	-0.401268	0.158812	-2.52668	0.0115145	0.201431	FALSE
SPECC1	1469.39	-0.263527	0.104288	-2.52691	0.0115072	0.201431	FALSE
TMEM86A	164.407	0.386708	0.153089	2.52603	0.0115361	0.201651	FALSE
TNFRSF18	18.8358	0.927259	0.367127	2.52572	0.0115462	0.201671	FALSE
COL4A1	4588.45	-0.626002	0.247882	-2.52541	0.0115565	0.201693	FALSE
TMEM145	47.7607	0.843972	0.334241	2.52504	0.0115684	0.201743	FALSE
SEMA6A	7665.45	-0.505339	0.200153	-2.52476	0.0115778	0.20175	FALSE
BAZ1A	1716.31	-0.38116	0.151025	-2.52381	0.0116089	0.20182	FALSE
DRD2	196.015	0.852171	0.337645	2.52386	0.0116073	0.20182	FALSE
RIIAD1	30.8272	0.739603	0.293027	2.52401	0.0116025	0.20182	FALSE
GOLPH3L	859.846	-0.261042	0.10345	-2.52337	0.0116236	0.201918	FALSE
FSTL1	13246.2	-0.3799	0.150607	-2.52246	0.0116538	0.202285	FALSE
NDUFA4L2	10.4744	0.973952	0.386202	2.52187	0.0116733	0.202467	FALSE
TSPEAR-AS2	185.003	0.709602	0.281419	2.52151	0.0116852	0.202517	FALSE
PAK1	2383.12	-0.28935	0.114806	-2.52034	0.0117242	0.202877	FALSE
PAM	13407.5	-0.515037	0.204335	-2.52055	0.011717	0.202877	FALSE
TNNI3	86.0457	0.934851	0.371026	2.51964	0.0117476	0.203125	FALSE
AC007405.6	69.9459	0.537535	0.213365	2.51932	0.0117581	0.20315	FALSE
HID1	3072.8	0.429774	0.170693	2.51783	0.0118082	0.203391	FALSE
IFFO1	473.509	0.392909	0.156129	2.51657	0.0118505	0.203391	FALSE
IGFBP6	743.261	1.1522	0.457866	2.51646	0.0118539	0.203391	FALSE
KREMEN1	689.151	-0.519102	0.206237	-2.51702	0.0118352	0.203391	FALSE
MAN1A2	3884.8	-0.651938	0.259023	-2.51691	0.011839	0.203391	FALSE
RP11-420K14.1	46.195	-1.01757	0.404046	-2.51845	0.0117872	0.203391	FALSE
SERPIND1	219.954	0.698436	0.277525	2.51666	0.0118474	0.203391	FALSE
SFXN4	399.16	0.358185	0.142303	2.51706	0.011834	0.203391	FALSE
SLC5A5	4.26053	1.09524	0.435043	2.51755	0.0118175	0.203391	FALSE
NLE1	406.931	0.420495	0.16713	2.51598	0.0118703	0.203515	FALSE
QTRT1	537.672	0.489221	0.19455	2.51463	0.0119159	0.203984	FALSE
SPAG4	78.1757	0.984726	0.391564	2.51485	0.0119082	0.203984	FALSE
CCDC171	86.3878	-0.473025	0.18814	-2.51422	0.0119295	0.204061	FALSE
RP11-1263C18.2	3.56764	1.07721	0.428496	2.51394	0.011939	0.204068	FALSE
NOV	24.1301	-0.824158	0.327949	-2.51307	0.0119687	0.204363	FALSE
PSEN1	2975.7	-0.342611	0.136341	-2.51289	0.0119746	0.204363	FALSE
CCDC88B	187.721	0.68592	0.273047	2.5121	0.0120016	0.204533	FALSE
FGA	1761.44	1.07026	0.426095	2.51179	0.012012	0.204533	FALSE
RASGEF1A	101.564	0.645053	0.256804	2.51185	0.0120101	0.204533	FALSE
MLLT3	757.704	-0.483641	0.192602	-2.51109	0.0120358	0.204782	FALSE
HS3ST1	73.1267	-0.69815	0.278149	-2.50999	0.0120736	0.20527	FALSE
ABCG2	327.89	0.671343	0.267812	2.50677	0.0121841	0.206835	FALSE
ACSL6	7.24346	1.02092	0.407352	2.50623	0.0122027	0.206835	FALSE
DEK	3635.08	-0.486751	0.194192	-2.50655	0.0121915	0.206835	FALSE
IL18R1	5.54416	1.06521	0.424982	2.50648	0.0121942	0.206835	FALSE
SCML4	8.56572	0.935496	0.373346	2.50571	0.0122207	0.206983	FALSE
C15orf41	339.358	-0.37411	0.149466	-2.50297	0.0123157	0.208093	FALSE
GLIPR1	85.826	0.835416	0.333835	2.50248	0.0123328	0.208093	FALSE
NPW	39.7163	0.975639	0.38973	2.50337	0.0123017	0.208093	FALSE
SLC25A12	562.061	-0.595262	0.237857	-2.5026	0.0123284	0.208093	FALSE
ST5	2432.74	-0.291975	0.116672	-2.50253	0.0123308	0.208093	FALSE
CCDC148	92.4936	-0.498622	0.199476	-2.49966	0.0124312	0.208247	FALSE
CDK6	2186.55	-0.59997	0.240023	-2.49963	0.0124322	0.208247	FALSE
FAM110A	413.588	0.730552	0.292259	2.49967	0.0124309	0.208247	FALSE
HSD3B7	94.6104	0.505741	0.202333	2.49955	0.012435	0.208247	FALSE
INSC	5.13204	1.03805	0.41502	2.5012	0.0123773	0.208247	FALSE
JAML	24.8151	1.0172	0.406647	2.50143	0.0123694	0.208247	FALSE
MAF	1647.11	-0.673114	0.269237	-2.50008	0.0124165	0.208247	FALSE
PTGES2	1250.73	0.535334	0.214089	2.50052	0.0124013	0.208247	FALSE
SBK2	50.3912	0.637972	0.25518	2.50008	0.0124164	0.208247	FALSE
TESC	53.7101	0.774119	0.309678	2.49976	0.0124278	0.208247	FALSE
MYO1F	13.5113	1.10461	0.441999	2.49912	0.0124502	0.208346	FALSE
SSTR1	493.584	0.781396	0.312832	2.49781	0.0124964	0.208961	FALSE
CASC1	138.621	-0.509219	0.203952	-2.49676	0.0125334	0.209111	FALSE
SIAH3	4.77787	1.04663	0.419138	2.49711	0.0125211	0.209111	FALSE
SYPL1	1690.67	-0.425393	0.170362	-2.497	0.012525	0.209111	FALSE
FLI1	10.5739	1.17896	0.472314	2.49613	0.0125555	0.209147	FALSE
SNPH	191.684	0.402272	0.161173	2.4959	0.0125636	0.209147	FALSE
WIPI1	973.844	0.42811	0.171515	2.49605	0.0125586	0.209147	FALSE
PCTP	347.888	0.437288	0.175282	2.49477	0.012604	0.209663	FALSE
COL24A1	71.1008	-0.888444	0.356326	-2.49335	0.0126545	0.210348	FALSE
BOP1	502.452	0.715167	0.286901	2.49273	0.0126766	0.210558	FALSE
CYP27C1	258.213	-0.565151	0.226853	-2.49127	0.0127289	0.2108	FALSE
GPM6A	417.101	-0.545974	0.219225	-2.49048	0.0127572	0.2108	FALSE
KLHL7	1909.1	-0.362892	0.145694	-2.49079	0.0127461	0.2108	FALSE
PLP1	2.9233	1.1367	0.456393	2.49063	0.0127518	0.2108	FALSE
PUSL1	248.053	0.75428	0.302763	2.49132	0.012727	0.2108	FALSE
RPL39L	102.433	0.88847	0.35671	2.49074	0.0127479	0.2108	FALSE
TSPAN18	1420.4	0.389456	0.156349	2.49094	0.0127405	0.2108	FALSE
PXDN	14812.9	-0.456264	0.183265	-2.48964	0.0127872	0.211139	FALSE
TTLL6	467.719	0.584081	0.234702	2.48861	0.0128245	0.211443	FALSE
WDPCP	160.98	-0.422353	0.169705	-2.48875	0.0128194	0.211443	FALSE
CD24	14006.7	-0.536359	0.215576	-2.48803	0.0128454	0.211476	FALSE
CTC-304I17.6	26.7463	0.877448	0.352637	2.48825	0.0128375	0.211476	FALSE
LINC01481	108.619	0.502965	0.202201	2.48745	0.0128663	0.211665	FALSE
TIGD1	231.519	-0.33702	0.135507	-2.48711	0.0128786	0.211711	FALSE
SPAG16	1640.56	-0.542517	0.218202	-2.48631	0.0129075	0.21203	FALSE
NEBL	660.2	-0.621055	0.249831	-2.4859	0.0129223	0.212117	FALSE
PLAG1	781.128	-0.598841	0.240946	-2.48538	0.0129414	0.212275	FALSE
WNK2	11897.5	-0.498256	0.2005	-2.48507	0.0129524	0.2123	FALSE
NANS	591.699	0.596921	0.240328	2.48378	0.0129997	0.212762	FALSE
PPP1R3F	463.957	0.417991	0.168283	2.48386	0.0129965	0.212762	FALSE
ADGRA3	3837.11	-0.429787	0.173137	-2.48235	0.0130519	0.213305	FALSE
ID4	434.96	0.546179	0.220007	2.48256	0.0130443	0.213305	FALSE
RP11-281P23.1	4.41069	-1.06861	0.430544	-2.48199	0.0130651	0.213364	FALSE
BEAN1	11.7118	0.88994	0.358711	2.48094	0.0131038	0.213367	FALSE
EVA1B	304.386	0.955702	0.385235	2.48083	0.0131077	0.213367	FALSE
MSH2	2395.75	-0.468816	0.188922	-2.48154	0.0130817	0.213367	FALSE
SIRPB2	2.99983	1.10301	0.444639	2.48069	0.0131129	0.213367	FALSE
TOP2A	4575.57	-0.513995	0.207193	-2.48075	0.0131105	0.213367	FALSE
PKP2	2617.45	-0.496124	0.200021	-2.48036	0.0131249	0.213406	FALSE
LRRC20	754.992	0.611509	0.246611	2.47964	0.0131513	0.213681	FALSE
ARHGAP4	289.551	0.521769	0.21054	2.47825	0.013203	0.214363	FALSE
RP11-38M8.1	17.1155	0.82739	0.333915	2.47785	0.0132177	0.214448	FALSE
TMEM254	1108.13	-0.319846	0.129103	-2.47746	0.0132322	0.214527	FALSE
CRAT	852.44	0.648636	0.261907	2.47659	0.0132643	0.214536	FALSE
NUDT9	785.661	-0.318807	0.128737	-2.47641	0.0132712	0.214536	FALSE
TRIM27	2799.13	0.278607	0.11248	2.47694	0.0132513	0.214536	FALSE
VSTM2L	1634.41	0.663129	0.267732	2.47684	0.0132552	0.214536	FALSE
ADAMTSL1	128.1	0.671089	0.271023	2.47614	0.0132813	0.214544	FALSE
INSRR	74.3583	0.864732	0.349451	2.47455	0.0133406	0.215036	FALSE
KB-1440D3.13	19.627	0.693841	0.280378	2.47466	0.0133362	0.215036	FALSE
RP3-428L16.2	113.697	0.661482	0.267293	2.47475	0.0133329	0.215036	FALSE
AP000648.5	5.45756	-1.04117	0.420861	-2.4739	0.0133647	0.215103	FALSE
ARHGAP28	2921.9	-0.691239	0.27958	-2.47242	0.0134203	0.215103	FALSE
ATP8B3	64.9267	0.829754	0.33561	2.47238	0.0134217	0.215103	FALSE
QDPR	1727.14	0.518851	0.209767	2.47347	0.0133808	0.215103	FALSE
RASGRF2	106.043	0.844236	0.341405	2.47283	0.0134049	0.215103	FALSE
RNF32	49.9111	-0.449152	0.18164	-2.47275	0.0134077	0.215103	FALSE
RP11-708B6.2	4.76683	1.02253	0.413334	2.47386	0.0133661	0.215103	FALSE
RP3-424M6.4	3.31398	1.06274	0.429748	2.47294	0.0134005	0.215103	FALSE
NEXN	693.144	-0.520027	0.210413	-2.47146	0.0134562	0.215502	FALSE
CHD3	3068.85	-0.313051	0.126736	-2.47009	0.0135078	0.216173	FALSE
ATP2B2	16.2249	0.89888	0.364232	2.46788	0.0135917	0.21624	FALSE
BCAR3	647.004	0.513721	0.20805	2.46921	0.013541	0.21624	FALSE
CCDC18	163.563	-0.538476	0.218227	-2.46751	0.0136058	0.21624	FALSE
CDH11	656.035	-0.718398	0.291078	-2.46806	0.0135848	0.21624	FALSE
GPR137C	403.392	-0.575766	0.23327	-2.46824	0.0135779	0.21624	FALSE
IKZF2	393.406	-0.75342	0.305118	-2.46928	0.0135386	0.21624	FALSE
LRG1	36.1243	0.664117	0.269037	2.4685	0.013568	0.21624	FALSE
NKILA	39.5719	-0.739411	0.299668	-2.46743	0.0136087	0.21624	FALSE
SSPN	72.0091	-0.656427	0.265847	-2.46919	0.0135419	0.21624	FALSE
TMEM179	128.638	0.711972	0.288397	2.46872	0.0135596	0.21624	FALSE
TSPAN12	684.263	-0.493391	0.200046	-2.46639	0.0136484	0.216716	FALSE
SEMA4D	1267.1	-0.339629	0.137729	-2.46592	0.0136662	0.216845	FALSE
CLRN3	12.5377	1.02479	0.415667	2.4654	0.013686	0.216943	FALSE
DNMBP	1910.45	-0.379768	0.154048	-2.46525	0.0136918	0.216943	FALSE
APP	30316.8	-0.460707	0.186918	-2.46475	0.0137109	0.217093	FALSE
CHEK1	818.402	-0.465243	0.188819	-2.46396	0.0137412	0.217418	FALSE
BAIAP2L2	555.81	0.806615	0.32748	2.4631	0.0137743	0.217787	FALSE
SYT7	1415.63	0.465597	0.189058	2.46273	0.0137885	0.217858	FALSE
FAM78B	31.5081	0.860778	0.349678	2.46163	0.0138306	0.218134	FALSE
GABRB1	15.0663	-0.863556	0.350823	-2.46151	0.0138352	0.218134	FALSE
LAMC3	2.99281	1.14593	0.465524	2.46159	0.0138324	0.218134	FALSE
CELSR1	1967.84	-0.554769	0.22543	-2.46093	0.0138576	0.218333	FALSE
IER3	364.233	0.782124	0.317872	2.4605	0.0138744	0.218444	FALSE
LGALS8	2141.69	-0.394044	0.160187	-2.4599	0.0138976	0.218654	FALSE
FAM109A	951.957	0.461317	0.187618	2.4588	0.0139401	0.218811	FALSE
LGI3	14.2276	0.913301	0.371675	2.45726	0.0140003	0.218811	FALSE
MTHFD1L	659.218	0.436265	0.177523	2.4575	0.0139906	0.218811	FALSE
MYL9	3850.84	0.761437	0.309804	2.4578	0.013979	0.218811	FALSE
RP11-209D14.2	3.57611	1.08141	0.440068	2.45737	0.013996	0.218811	FALSE
RPAP2	765.272	-0.474963	0.193222	-2.45813	0.0139664	0.218811	FALSE
SIN3A	2724.52	-0.284261	0.115689	-2.45713	0.0140054	0.218811	FALSE
SLC4A8	677.607	0.54456	0.221434	2.45924	0.0139231	0.218811	FALSE
TIMM44	900.836	0.34774	0.141492	2.45767	0.0139841	0.218811	FALSE
TRPC7-AS1	3.48586	1.06014	0.431197	2.4586	0.0139481	0.218811	FALSE
CALHM3	23.434	0.797244	0.324665	2.45559	0.0140655	0.219023	FALSE
CEACAM19	708.273	0.52143	0.21228	2.45633	0.0140365	0.219023	FALSE
CLCN1	18.5599	0.661747	0.26949	2.45555	0.0140669	0.219023	FALSE
KCNK3	161.653	0.708512	0.288465	2.45615	0.0140435	0.219023	FALSE
TTLL5	897.095	-0.311188	0.12673	-2.45552	0.0140679	0.219023	FALSE
APOLD1	137.564	-0.485891	0.19793	-2.45487	0.0140937	0.219272	FALSE
ZNF766	628.098	-0.384991	0.156942	-2.45307	0.0141643	0.220217	FALSE
NFAM1	15.4561	0.81684	0.333057	2.45255	0.0141847	0.220274	FALSE
SMIM5	195.841	0.763654	0.311381	2.45248	0.0141877	0.220274	FALSE
SDF2L1	356.828	0.73919	0.301471	2.45194	0.0142087	0.220447	FALSE
B2M	8403.49	-0.412742	0.168418	-2.45069	0.0142582	0.220755	FALSE
EYS	22.5258	0.848614	0.346211	2.45115	0.0142401	0.220755	FALSE
RP11-468N14.6	8.06949	-0.859459	0.350668	-2.45092	0.0142492	0.220755	FALSE
ECE2	142.394	0.768037	0.313635	2.44882	0.0143325	0.220945	FALSE
ESRP1	3289.98	-0.353389	0.144266	-2.44957	0.0143027	0.220945	FALSE
GFRA2	40.4965	0.722435	0.295033	2.44866	0.0143389	0.220945	FALSE
RP11-298I3.1	3.01384	-1.1115	0.453865	-2.44896	0.0143268	0.220945	FALSE
SLC15A1	59.8947	-0.672124	0.274429	-2.44917	0.0143187	0.220945	FALSE
SLC22A31	459.473	0.585564	0.239138	2.44864	0.0143397	0.220945	FALSE
TSHR	114.776	0.855722	0.349317	2.4497	0.0142977	0.220945	FALSE
ANKS1B	374.289	0.743929	0.304005	2.44709	0.0144014	0.221424	FALSE
AP000892.6	613.896	0.76153	0.311134	2.4476	0.0143813	0.221424	FALSE
CAP2	558.572	-0.418499	0.171043	-2.44674	0.0144154	0.221424	FALSE
CNN3	9101.54	-0.291395	0.119103	-2.44659	0.0144216	0.221424	FALSE
EPHA5	4.15065	-1.06856	0.436757	-2.44659	0.0144216	0.221424	FALSE
RP11-484D2.3	4.87022	-1.13912	0.465637	-2.44637	0.0144301	0.221424	FALSE
CXCL17	4.97409	-1.03666	0.42415	-2.44409	0.0145217	0.222372	FALSE
HACD3	6785.13	-0.357641	0.146316	-2.44431	0.0145128	0.222372	FALSE
RHEBL1	8.23176	0.954504	0.390488	2.44439	0.0145099	0.222372	FALSE
C3orf80	101.164	0.86351	0.353365	2.44368	0.0145384	0.222474	FALSE
ROBO2	1895.59	-0.705497	0.288799	-2.44286	0.0145714	0.222826	FALSE
TRPC7	11.8247	0.966205	0.395687	2.44184	0.0146126	0.223304	FALSE
SOX18	6.49693	1.13517	0.464942	2.44153	0.0146252	0.223344	FALSE
DSCAM	115.473	0.637002	0.260995	2.44067	0.0146601	0.223724	FALSE
GLB1L2	653.905	-0.382421	0.156729	-2.44002	0.0146865	0.223975	FALSE
PKIB	530.387	0.764007	0.313163	2.43964	0.0147017	0.224054	FALSE
GATM-AS1	3.3386	1.09668	0.450162	2.4362	0.0148425	0.225891	FALSE
NPFFR2	150.207	0.549275	0.225452	2.43633	0.0148372	0.225891	FALSE
AC079922.3	12.094	0.904361	0.371833	2.43217	0.0150088	0.228266	FALSE
RAB7B	9.82758	0.908895	0.373876	2.431	0.015057	0.228844	FALSE
RTN1	644.651	0.459269	0.188941	2.43075	0.0150675	0.228848	FALSE
MATN3	137.798	-0.555058	0.228388	-2.43033	0.0150851	0.228898	FALSE
NECAP1	959.493	0.439444	0.180828	2.43018	0.0150913	0.228898	FALSE
PCDH12	52.1129	0.841295	0.346228	2.42988	0.0151037	0.228931	FALSE
ZNF596	74.0839	-0.459695	0.189249	-2.42905	0.0151385	0.229303	FALSE
CALCA	120.262	0.894046	0.368167	2.42837	0.0151667	0.229552	FALSE
F11R	3872.95	-0.310567	0.127902	-2.42816	0.0151755	0.229552	FALSE
GNAO1	798.433	0.741179	0.305373	2.42713	0.0152188	0.229741	FALSE
PC	245.514	0.434346	0.178951	2.42719	0.0152164	0.229741	FALSE
TBCK	1338.5	-0.387243	0.159548	-2.42713	0.0152188	0.229741	FALSE
SLC13A2	9.37327	0.87175	0.359206	2.42688	0.0152292	0.229743	FALSE
AC013275.2	40.8978	0.738164	0.304232	2.42632	0.0152527	0.229799	FALSE
HYAL3	91.86	0.614631	0.25332	2.4263	0.0152535	0.229799	FALSE
CLEC4G	27.3253	0.914569	0.37712	2.42514	0.0153024	0.230071	FALSE
DIS3L	912.883	-0.330803	0.1364	-2.42525	0.015298	0.230071	FALSE
HOGA1	39.7843	0.699194	0.288262	2.42555	0.0152852	0.230071	FALSE
NKX3-2	4.3664	1.03952	0.42871	2.42475	0.0153187	0.230162	FALSE
CELF4	267.866	0.767429	0.316674	2.42341	0.0153757	0.23024	FALSE
IL2RB	10.7618	1.08872	0.449074	2.42438	0.0153347	0.23024	FALSE
LAD1	643.106	0.571938	0.236051	2.42295	0.0153951	0.23024	FALSE
MDH2	2840.07	0.586383	0.241941	2.42366	0.0153649	0.23024	FALSE
NR0B2	39.4597	0.964825	0.398106	2.42354	0.01537	0.23024	FALSE
SND1	6630.37	0.325587	0.134355	2.42333	0.0153791	0.23024	FALSE
YAP1	4085.73	-0.609524	0.251565	-2.42293	0.015396	0.23024	FALSE
ITGA6	4733.51	-0.654113	0.270029	-2.42238	0.0154193	0.23028	FALSE
SUSD3	22.2815	0.981408	0.405106	2.4226	0.0154101	0.23028	FALSE
IRF9	119.677	0.587938	0.242994	2.41956	0.0155391	0.23099	FALSE
MEGF11	52.593	0.659387	0.272453	2.42018	0.0155128	0.23099	FALSE
MURC	323.337	-0.429248	0.177338	-2.4205	0.015499	0.23099	FALSE
RABGAP1	2189.52	-0.486997	0.201154	-2.42102	0.0154772	0.23099	FALSE
RPUSD1	554.034	0.682098	0.281806	2.42045	0.0155013	0.23099	FALSE
SLC51B	12.0132	1.11895	0.462447	2.41963	0.0155363	0.23099	FALSE
SMAP2	917.999	0.280927	0.116089	2.41993	0.0155233	0.23099	FALSE
TBX5	2.17855	1.07941	0.446211	2.41907	0.0155604	0.231153	FALSE
SLC4A4	4504.63	-0.777015	0.321319	-2.4182	0.0155974	0.231548	FALSE
ARMC2	262.141	-0.440304	0.182142	-2.41737	0.0156331	0.231858	FALSE
RP11-385H1.1	4.42005	1.02067	0.422246	2.41723	0.0156391	0.231858	FALSE
KLHL31	84.4514	-0.666126	0.275623	-2.4168	0.0156575	0.231977	FALSE
HLA-DRB1	41.6749	0.978394	0.40492	2.41626	0.0156807	0.232168	FALSE
TMEM63C	116.694	0.642994	0.266261	2.4149	0.0157396	0.232885	FALSE
CTU2	244.369	0.560543	0.232209	2.41395	0.0157804	0.232977	FALSE
GABARAPL2	1718.9	0.333283	0.138062	2.414	0.0157783	0.232977	FALSE
RNF152	1151.95	-0.614078	0.254404	-2.41379	0.0157875	0.232977	FALSE
RP11-586L23.1	15.3286	0.847846	0.351185	2.41424	0.015768	0.232977	FALSE
ACTR3	5294.11	-0.415878	0.172348	-2.41301	0.0158212	0.233167	FALSE
ZNF501	181.832	-0.475314	0.196969	-2.41314	0.0158156	0.233167	FALSE
MAGT1	2479.34	-0.473652	0.196319	-2.41266	0.0158365	0.233239	FALSE
AC093724.2	5.80448	1.08411	0.449641	2.41107	0.0159058	0.234106	FALSE
NCF2	32.3388	0.821835	0.340921	2.41063	0.0159249	0.234177	FALSE
NOTUM	8.94994	1.01142	0.419594	2.41048	0.0159316	0.234177	FALSE
LINC00617	661.659	0.569315	0.236233	2.40997	0.015954	0.234351	FALSE
ANP32E	2533.82	-0.48071	0.199682	-2.40738	0.0160675	0.235569	FALSE
MGST1	2267.21	-0.319046	0.132509	-2.40772	0.0160523	0.235569	FALSE
RP11-1072C15.6	7.4451	-0.82265	0.341723	-2.40736	0.0160685	0.235569	FALSE
TUBA3FP	66.3568	0.579383	0.240764	2.40644	0.0161088	0.236005	FALSE
ACAT2	1137.47	0.563996	0.234458	2.40553	0.0161491	0.236095	FALSE
C11orf63	181.036	-0.521348	0.216746	-2.40535	0.0161571	0.236095	FALSE
SH3BGRL	2790.02	-0.343037	0.142603	-2.40553	0.0161489	0.236095	FALSE
SPINK4	67.3426	0.855185	0.35547	2.40579	0.0161377	0.236095	FALSE
SYNPO	230.506	0.671783	0.27932	2.40506	0.0161697	0.236124	FALSE
ZNF160	2394.66	-0.62334	0.259239	-2.4045	0.0161946	0.236334	FALSE
SORD2P	270.308	-0.500897	0.208376	-2.40382	0.0162248	0.23662	FALSE
ARSK	285.217	-0.641335	0.267023	-2.40179	0.0163149	0.237042	FALSE
CDK19	721.861	-0.478166	0.199103	-2.4016	0.0163234	0.237042	FALSE
CSH1	2.43861	1.14143	0.475293	2.40152	0.016327	0.237042	FALSE
ITGA4	7.32155	1.09022	0.453954	2.4016	0.0163236	0.237042	FALSE
RP11-864N7.2	221.982	1.13454	0.47243	2.4015	0.016328	0.237042	FALSE
SGPP2	1479.12	-0.677002	0.281758	-2.40278	0.016271	0.237042	FALSE
TMEM246	1140.85	-0.41665	0.173468	-2.40189	0.0163107	0.237042	FALSE
GJC1	2275.74	-0.495938	0.206701	-2.3993	0.0164266	0.238165	FALSE
PRSS50	46.8484	0.679812	0.283333	2.39934	0.0164245	0.238165	FALSE
GRIA4	92.6064	0.890252	0.371126	2.39879	0.0164496	0.238343	FALSE
CEP126	386.605	-0.638776	0.266452	-2.39734	0.0165147	0.238346	FALSE
CFAP43	607.012	-0.613388	0.255774	-2.39817	0.0164773	0.238346	FALSE
EXT1	2675.43	-0.376493	0.157043	-2.3974	0.0165121	0.238346	FALSE
FAM212B	708.09	0.482767	0.201411	2.39692	0.0165335	0.238346	FALSE
GRIP2	2650.89	-0.700279	0.292119	-2.39724	0.0165192	0.238346	FALSE
IGSF3	3022.28	-0.508163	0.21198	-2.39722	0.0165199	0.238346	FALSE
SCN4A	56.044	0.763067	0.318358	2.39689	0.0165351	0.238346	FALSE
ZNF813	452.678	-0.483687	0.201756	-2.39739	0.0165122	0.238346	FALSE
KYAT1	224.393	0.546404	0.22804	2.39609	0.0165708	0.238707	FALSE
MPP2	220.829	0.595762	0.248673	2.39576	0.0165858	0.23877	FALSE
RNF141	1012.6	-0.436742	0.18233	-2.39533	0.0166053	0.238897	FALSE
CHRNA7	64.7627	-0.556778	0.232502	-2.39473	0.0166328	0.239138	FALSE
ATP6V1G2	65.2375	0.497216	0.207723	2.39365	0.0166815	0.239684	FALSE
ZDHHC7	1958.27	-0.233851	0.0977469	-2.39242	0.0167379	0.24034	FALSE
CNTN5	19.9169	0.832498	0.348032	2.39201	0.0167562	0.240448	FALSE
SPATS2	1648.6	-0.281283	0.117669	-2.39045	0.0168277	0.24132	FALSE
HPD	20.6565	0.862476	0.360843	2.39017	0.0168406	0.24135	FALSE
APBA2	1072.38	0.289106	0.121006	2.38918	0.0168859	0.241428	FALSE
C4orf48	352.166	1.07337	0.449158	2.38974	0.0168603	0.241428	FALSE
DES	11.1376	0.971473	0.406779	2.38821	0.0169308	0.241428	FALSE
NLRC5	4.5531	1.10354	0.462085	2.38818	0.0169322	0.241428	FALSE
PRODH2	80.1102	0.701977	0.293891	2.38856	0.0169143	0.241428	FALSE
RAMP1	1248.28	0.845912	0.354201	2.38822	0.0169301	0.241428	FALSE
RP4-665J23.1	24.069	0.771089	0.322859	2.38832	0.0169257	0.241428	FALSE
SERINC5	8482.78	-0.659213	0.276033	-2.38817	0.0169325	0.241428	FALSE
NAXD	1543.76	0.289641	0.121305	2.3877	0.016954	0.241581	FALSE
SOX8	77.3162	0.489112	0.204971	2.38625	0.0170211	0.242383	FALSE
GINM1	866.192	-0.316925	0.132864	-2.38533	0.0170638	0.242837	FALSE
ANKS4B	135.527	0.758676	0.318325	2.38334	0.0171566	0.243446	FALSE
C17orf100	182.02	0.357436	0.149929	2.38403	0.0171244	0.243446	FALSE
MYO18B	160.27	0.484691	0.203332	2.38374	0.0171375	0.243446	FALSE
SCN5A	244.269	0.570335	0.239311	2.38324	0.0171611	0.243446	FALSE
ZFP62	1350.67	-0.490644	0.205842	-2.3836	0.0171444	0.243446	FALSE
EHHADH	278.918	-0.428964	0.180089	-2.38196	0.0172208	0.243999	FALSE
SCN1B	75.9054	0.615328	0.258331	2.38194	0.0172219	0.243999	FALSE
SMOX	698.73	0.526052	0.220881	2.38161	0.017237	0.244058	FALSE
PARD6A	77.2183	0.793978	0.333418	2.38133	0.0172503	0.244091	FALSE
ATP6V0E2	1099.35	0.632652	0.265699	2.38108	0.0172618	0.244099	FALSE
CLEC11A	134.066	0.958304	0.402568	2.38048	0.0172903	0.244349	FALSE
ACP5	42.3442	0.711177	0.298832	2.37985	0.0173196	0.244607	FALSE
SIT1	4.80097	0.995019	0.418161	2.37951	0.0173357	0.244681	FALSE
APOH	3.49532	1.12676	0.473601	2.37913	0.0173535	0.244778	FALSE
FLT3	5.57809	-0.879212	0.369599	-2.37882	0.0173679	0.244827	FALSE
DLG2	75.0963	-0.618788	0.260255	-2.37762	0.0174247	0.245472	FALSE
NHS	2840.04	-0.758398	0.31911	-2.3766	0.0174728	0.245995	FALSE
CDC14A	437.091	-0.548833	0.231008	-2.37581	0.0175103	0.246367	FALSE
CTC-351M12.1	127.699	-0.513523	0.216174	-2.3755	0.0175251	0.24642	FALSE
EPB41L2	2615.26	-0.417576	0.175901	-2.37393	0.0175998	0.246546	FALSE
GGCX	1591.84	-0.405654	0.170837	-2.37451	0.0175722	0.246546	FALSE
RNF19B	384.886	0.312824	0.131744	2.37448	0.0175739	0.246546	FALSE
SPATA17	347.227	-0.461265	0.194232	-2.37481	0.0175578	0.246546	FALSE
SPTBN2	1926.5	0.386225	0.162669	2.3743	0.0175822	0.246546	FALSE
ZDHHC8P1	119.695	0.521037	0.219483	2.37392	0.0176002	0.246546	FALSE
SMIM1	48.9052	0.991998	0.418004	2.37318	0.0176358	0.246891	FALSE
ACVR1C	217.02	0.897912	0.378601	2.37166	0.0177083	0.247751	FALSE
LRRN1	3783.37	-0.499861	0.210831	-2.37091	0.0177442	0.247895	FALSE
PCDHB16	115.961	-0.75833	0.319869	-2.37075	0.017752	0.247895	FALSE
TGFBR3	697.401	-0.664678	0.280347	-2.37091	0.0177444	0.247895	FALSE
C2CD4C	535.315	0.499864	0.210883	2.37034	0.0177718	0.248018	FALSE
PRELP	24.0707	-0.653107	0.275581	-2.36993	0.0177914	0.248136	FALSE
IL17RD	820.404	-0.520612	0.21982	-2.36835	0.0178677	0.249045	FALSE
RP11-492E3.2	7.75371	0.933914	0.394481	2.36745	0.0179112	0.249412	FALSE
SLC16A4	23.3565	0.683426	0.288689	2.36734	0.0179163	0.249412	FALSE
EEF1DP1	4.81331	0.979808	0.414041	2.36645	0.0179594	0.249856	FALSE
PSMC1P1	17.3422	-0.626736	0.264868	-2.36622	0.0179706	0.249856	FALSE
GBP4	3.37272	1.11773	0.472595	2.36509	0.0180259	0.250469	FALSE
AC005609.18	6.41002	-0.966077	0.408595	-2.36439	0.01806	0.250568	FALSE
AC020951.1	4.25574	1.09991	0.465351	2.36361	0.0180981	0.250568	FALSE
ATP5D	912.958	0.879699	0.372191	2.36357	0.0180998	0.250568	FALSE
ERMAP	323.719	-0.36777	0.155623	-2.36321	0.0181174	0.250568	FALSE
HNRNPH2	2554.72	-0.276193	0.116881	-2.36303	0.0181261	0.250568	FALSE
LINC00864	2.46943	-1.07941	0.456669	-2.36366	0.0180957	0.250568	FALSE
MRPL41	602.807	0.788642	0.333762	2.36288	0.0181333	0.250568	FALSE
RP11-379H18.1	283.108	-0.457763	0.193625	-2.36417	0.0180707	0.250568	FALSE
RP11-525K10.3	9.43242	0.811417	0.343403	2.36287	0.0181339	0.250568	FALSE
NDUFAF3	588.781	0.755172	0.319659	2.36243	0.0181557	0.250715	FALSE
CCNB3	19.2449	0.680974	0.288372	2.36144	0.018204	0.251146	FALSE
KIF15	605.539	-0.421449	0.178514	-2.36088	0.0182319	0.251146	FALSE
SCO2	232.867	0.836105	0.354147	2.3609	0.0182306	0.251146	FALSE
SERP2	129.807	0.590404	0.250038	2.36125	0.0182133	0.251146	FALSE
URAD	48.6818	1.12102	0.474889	2.3606	0.0182455	0.251179	FALSE
ANOS2P	183.046	-0.64697	0.274239	-2.35915	0.018317	0.251409	FALSE
CYTIP	3.87541	1.10772	0.46955	2.35912	0.0183184	0.251409	FALSE
DHRS4-AS1	358.531	-0.425669	0.180384	-2.35979	0.0182852	0.251409	FALSE
MMAB	559.742	0.551585	0.233756	2.35966	0.0182916	0.251409	FALSE
RP11-459D22.1	10.8638	-0.858092	0.363674	-2.35951	0.0182991	0.251409	FALSE
WDR63	188.419	-0.586758	0.248768	-2.35865	0.0183414	0.25157	FALSE
CDH8	81.3417	-0.616384	0.261475	-2.35733	0.0184068	0.252158	FALSE
RP4-604G5.1	3.94834	0.948875	0.402518	2.35735	0.0184059	0.252158	FALSE
MLKL	2.96732	1.1032	0.468057	2.35697	0.0184247	0.252248	FALSE
CXorf23	378.479	-0.532973	0.226191	-2.3563	0.0184581	0.252551	FALSE
DOCK2	8.66175	1.01318	0.430222	2.35502	0.0185216	0.252843	FALSE
SYN2	25.6431	0.579081	0.245828	2.35563	0.0184911	0.252843	FALSE
TFCP2L1	280.677	-0.548565	0.23294	-2.35496	0.0185247	0.252843	FALSE
VLDLR	801.618	0.491192	0.208567	2.35508	0.0185186	0.252843	FALSE
ATP1A3	143.509	0.850051	0.361061	2.35431	0.0185571	0.252982	FALSE
SLC14A2	23.6411	-0.889008	0.37761	-2.3543	0.0185575	0.252982	FALSE
RGS16	159.729	0.757453	0.321847	2.35345	0.0185999	0.253405	FALSE
SEPT7	3761.54	-0.468968	0.199287	-2.35323	0.0186112	0.253405	FALSE
FBN3	4891.19	-0.440762	0.18735	-2.35261	0.0186422	0.253672	FALSE
PREX1	452.22	0.358832	0.152564	2.35201	0.0186722	0.253926	FALSE
CCS	814.637	0.636688	0.270859	2.35062	0.0187421	0.254722	FALSE
LINC01330	4.16554	1.10475	0.470074	2.35017	0.0187649	0.254877	FALSE
VIM	24906.3	0.713662	0.303748	2.34952	0.0187975	0.255164	FALSE
TLE6	500.14	0.622858	0.265173	2.34887	0.0188304	0.255456	FALSE
RNASEH2C	642.929	0.524526	0.223331	2.34864	0.018842	0.255458	FALSE
NADK2	719.796	-0.410634	0.174863	-2.34832	0.0188584	0.255526	FALSE
MSC-AS1	37.4447	0.892782	0.380231	2.348	0.0188747	0.255591	FALSE
ZNF43	1545.04	-0.492915	0.209953	-2.34773	0.018888	0.255617	FALSE
AQP7	22.8087	0.795991	0.339141	2.34708	0.0189214	0.255913	FALSE
EFCAB7	500.763	-0.379007	0.161505	-2.34673	0.0189391	0.255998	FALSE
LMBRD1	1279.19	-0.319834	0.136321	-2.34618	0.0189671	0.256178	FALSE
MIF	1043.56	1.05836	0.451129	2.34602	0.0189753	0.256178	FALSE
APCDD1	219.296	-0.462184	0.197063	-2.34536	0.0190086	0.256318	FALSE
RPLP0P2	16.8013	0.754598	0.321719	2.34552	0.0190007	0.256318	FALSE
IDI1	1170.4	0.460112	0.196281	2.34415	0.0190704	0.256996	FALSE
RP11-25K19.1	221.626	0.426898	0.182172	2.34338	0.01911	0.257375	FALSE
EXPH5	449.115	-0.592782	0.253028	-2.34275	0.0191421	0.25759	FALSE
KCNC2	5.97735	1.05543	0.450575	2.3424	0.0191599	0.25759	FALSE
TNFAIP2	497.927	0.472527	0.201728	2.34239	0.0191605	0.25759	FALSE
GCH1	3072.75	0.597258	0.25502	2.342	0.0191805	0.257704	FALSE
KTN1	6842.54	-0.483823	0.20668	-2.34093	0.0192357	0.258135	FALSE
NTN1	464.935	-0.408801	0.174617	-2.34113	0.0192256	0.258135	FALSE
GYG2P1	25.6906	1.10877	0.473771	2.34031	0.0192679	0.258411	FALSE
CD59	5816.15	-0.312029	0.133466	-2.33788	0.0193934	0.258864	FALSE
CHURC1	460.049	-0.434158	0.185707	-2.33787	0.0193942	0.258864	FALSE
GAB2	2424.41	-0.467974	0.200129	-2.33836	0.0193683	0.258864	FALSE
GALNT16	973.898	-0.411612	0.175948	-2.33939	0.0193151	0.258864	FALSE
LHFPL5	4.28582	0.995413	0.425695	2.33833	0.0193703	0.258864	FALSE
MSN	2852.06	0.299079	0.127888	2.33861	0.0193557	0.258864	FALSE
NIN	1015.09	-0.57527	0.245979	-2.33869	0.0193513	0.258864	FALSE
NXT2	278.437	-0.440917	0.188587	-2.338	0.0193871	0.258864	FALSE
GUCY1A2	3348.01	-0.784887	0.335829	-2.33716	0.0194308	0.25913	FALSE
RP11-138I17.1	8.17752	-1.1036	0.472265	-2.33681	0.019449	0.25913	FALSE
TES	2609.03	-0.339689	0.145355	-2.33695	0.0194416	0.25913	FALSE
ASB13	354.981	0.451761	0.193378	2.33615	0.0194833	0.259138	FALSE
CACNA2D4	6.55505	0.937662	0.401434	2.33578	0.0195027	0.259138	FALSE
CHMP4C	286.967	-0.361085	0.154595	-2.33569	0.0195075	0.259138	FALSE
ERICH2	21.7681	0.687524	0.294269	2.33638	0.0194715	0.259138	FALSE
RP11-70P17.1	4.50343	0.964058	0.412708	2.33593	0.0194948	0.259138	FALSE
BTBD11	267.393	0.551111	0.236002	2.3352	0.0195329	0.259322	FALSE
CXADR	2360.24	-0.629803	0.269728	-2.33496	0.0195457	0.259337	FALSE
DHRS4L1	2.40433	1.05727	0.452958	2.33415	0.0195878	0.259433	FALSE
FKBP9	2043.81	-0.530653	0.227338	-2.3342	0.0195852	0.259433	FALSE
NACAD	484.093	0.53147	0.227683	2.33425	0.0195824	0.259433	FALSE
ALOX12P2	289.123	-0.606544	0.259882	-2.33392	0.0196	0.259442	FALSE
RP11-752L20.3	69.0757	-0.66337	0.28431	-2.33326	0.0196343	0.259742	FALSE
RP11-317L10.1	4.30638	-0.93813	0.402146	-2.33281	0.0196583	0.259752	FALSE
SPATA2L	384.89	0.706425	0.302813	2.33288	0.0196546	0.259752	FALSE
CPNE2	312.162	0.553683	0.237419	2.3321	0.0196956	0.259938	FALSE
GHRH	38.7284	0.859381	0.368478	2.33225	0.0196878	0.259938	FALSE
NAA10	652.241	0.5431	0.23291	2.3318	0.0197111	0.259989	FALSE
RMDN2	68.4509	-0.534834	0.229489	-2.33054	0.0197774	0.26071	FALSE
LTBP2	132.602	-0.610402	0.261972	-2.33003	0.0198045	0.260747	FALSE
MLPH	84.7628	0.611502	0.262431	2.33014	0.0197988	0.260747	FALSE
RP11-22L13.1	7.47128	0.933703	0.40076	2.32983	0.0198152	0.260747	FALSE
C12orf73	325.65	0.378358	0.162439	2.32923	0.0198469	0.260891	FALSE
HDX	301.19	-0.463502	0.199002	-2.32913	0.0198523	0.260891	FALSE
IL1RAP	586.553	-0.755789	0.324518	-2.32896	0.0198612	0.260891	FALSE
TXNDC16	1213.21	-0.57978	0.248977	-2.32865	0.0198775	0.260906	FALSE
YIF1A	1222.74	0.624878	0.268361	2.3285	0.0198856	0.260906	FALSE
CTDSPL	2474.14	-0.268931	0.115538	-2.32765	0.0199306	0.261205	FALSE
TRBV30	12.3433	-0.904295	0.388505	-2.32763	0.0199318	0.261205	FALSE
AC072062.1	15.3412	-0.771989	0.331786	-2.32677	0.0199778	0.261654	FALSE
TESK1	1228.01	0.438968	0.188729	2.32592	0.020023	0.262093	FALSE
LINC01139	18.8721	0.961916	0.413814	2.32451	0.020098	0.26292	FALSE
RP11-434E6.4	2.69341	1.04071	0.447807	2.32401	0.0201249	0.263119	FALSE
RP11-678G15.2	3.13566	1.04314	0.449175	2.32235	0.0202143	0.264132	FALSE
EFCAB14	2559.48	-0.477151	0.205519	-2.32169	0.0202498	0.264442	FALSE
GLG1	7516.06	-0.324315	0.139742	-2.32082	0.0202966	0.264875	FALSE
PLP2	189.073	0.661413	0.285014	2.32063	0.0203067	0.264875	FALSE
STRCP1	2.27997	-1.07416	0.463004	-2.31999	0.0203416	0.265021	FALSE
TACR1	109.507	-0.536512	0.231236	-2.3202	0.0203303	0.265021	FALSE
PHF21A	1953.48	-0.351061	0.151343	-2.31963	0.0203607	0.265116	FALSE
LRRC8C	223.84	-0.569304	0.245532	-2.31865	0.0204138	0.265498	FALSE
TMEM30B	908.495	-0.46414	0.200172	-2.31871	0.020411	0.265498	FALSE
SNHG12	313.767	0.454191	0.195933	2.31809	0.0204445	0.265743	FALSE
C2orf49	718.048	-0.451854	0.195009	-2.3171	0.0204985	0.266136	FALSE
SCARB1	553.642	0.616066	0.265878	2.3171	0.0204983	0.266136	FALSE
CLSTN1	5791.59	-0.350142	0.15114	-2.31668	0.0205213	0.266261	FALSE
COX14	378.505	0.722465	0.311979	2.31575	0.0205718	0.266261	FALSE
FAM13C	76.9544	-0.620086	0.267911	-2.31452	0.0206392	0.266261	FALSE
GPR68	33.5118	0.630528	0.272355	2.3151	0.0206074	0.266261	FALSE
MCPH1-AS1	41.7041	-0.509092	0.219859	-2.31554	0.0205836	0.266261	FALSE
MKRN3-AS1	132.49	-0.552053	0.238448	-2.31519	0.0206025	0.266261	FALSE
PHAX	1052.2	-0.327162	0.141307	-2.31527	0.0205984	0.266261	FALSE
RP11-439C15.4	20.0761	-0.612719	0.264698	-2.31479	0.0206246	0.266261	FALSE
RP11-566K19.6	19.7704	0.686554	0.296418	2.31617	0.0205493	0.266261	FALSE
RPL13AP5	222.771	1.06218	0.458641	2.31594	0.0205616	0.266261	FALSE
SERINC1	5127.83	-0.555405	0.239964	-2.31454	0.0206383	0.266261	FALSE
HHLA2	82.898	1.09283	0.472663	2.31206	0.0207744	0.267851	FALSE
CTC-260E6.6	21.9151	-0.782934	0.338666	-2.31182	0.0207876	0.267852	FALSE
RP11-262A16.1	3.821	-0.993027	0.42958	-2.31162	0.0207985	0.267852	FALSE
CXorf36	11.0192	1.09617	0.474487	2.31022	0.0208761	0.268132	FALSE
EPHA10	19.3186	0.627668	0.271681	2.31032	0.0208706	0.268132	FALSE
PHYHIPL	65.1039	0.6669	0.288627	2.3106	0.0208551	0.268132	FALSE
RTBDN	3.56525	1.05305	0.455748	2.3106	0.020855	0.268132	FALSE
SELENOM	110.251	0.864101	0.374046	2.31015	0.0208801	0.268132	FALSE
CATSPER3	7.91312	0.891902	0.386143	2.30977	0.0209008	0.268243	FALSE
BLNK	15.3709	-0.735793	0.318644	-2.30914	0.0209358	0.268384	FALSE
FAM216A	172.116	0.522879	0.226422	2.30931	0.0209264	0.268384	FALSE
GGN	32.1484	0.76931	0.333237	2.3086	0.0209657	0.268613	FALSE
NCS1	1491.21	0.364115	0.157741	2.30832	0.0209816	0.268657	FALSE
NEMP2	186.812	-0.421701	0.182721	-2.30789	0.0210052	0.268657	FALSE
NT5E	1010.8	-0.660973	0.286386	-2.30798	0.0210001	0.268657	FALSE
GLB1	5348.44	-0.45201	0.196032	-2.3058	0.021122	0.269866	FALSE
STX7	1664.21	-0.398627	0.172883	-2.30576	0.0211239	0.269866	FALSE
DOK7	7.19857	0.938758	0.407433	2.30408	0.0212181	0.269991	FALSE
FXR2	1876.28	0.242362	0.105187	2.3041	0.0212173	0.269991	FALSE
IMP4	917.348	0.369926	0.160486	2.30504	0.0211641	0.269991	FALSE
JPH4	4.71292	1.03491	0.449012	2.30486	0.0211744	0.269991	FALSE
MYH4	12.7936	0.855427	0.371139	2.30487	0.0211738	0.269991	FALSE
NFASC	1043.21	0.808508	0.350886	2.30419	0.0212118	0.269991	FALSE
PI16	5.60641	0.940588	0.408211	2.30417	0.021213	0.269991	FALSE
NUP50-AS1	147.12	0.381	0.165381	2.30377	0.0212357	0.27006	FALSE
PCDH11X	69.541	-0.871063	0.37818	-2.3033	0.0212617	0.270084	FALSE
USP46-AS1	63.1393	-0.503799	0.218719	-2.30341	0.0212557	0.270084	FALSE
ADIPOR1	1984.27	0.287429	0.124821	2.30273	0.0212938	0.270338	FALSE
FZD7	2897.57	-0.470246	0.204289	-2.30186	0.0213428	0.270807	FALSE
CEP162	572.454	-0.521988	0.226844	-2.30109	0.0213865	0.271203	FALSE
RP11-293M10.6	7.95519	-0.879418	0.382209	-2.30088	0.0213983	0.271203	FALSE
SLC25A5	4100.95	0.451409	0.19622	2.30052	0.0214186	0.271307	FALSE
KCTD21-AS1	36.8052	-0.450407	0.19588	-2.2994	0.0214822	0.271958	FALSE
BCAR1	2469.14	0.457966	0.199273	2.29818	0.0215513	0.272073	FALSE
ECM2	11.4655	0.969002	0.421641	2.29817	0.0215521	0.272073	FALSE
FGF1	3.82987	1.08302	0.471225	2.29832	0.0215437	0.272073	FALSE
IL36G	13.2217	0.819221	0.35644	2.29834	0.0215422	0.272073	FALSE
ZNF271P	841.39	-0.359072	0.156239	-2.29823	0.0215489	0.272073	FALSE
KIF14	260.785	-0.651696	0.283842	-2.29598	0.0216768	0.273492	FALSE
PUS1	366.932	0.483863	0.210771	2.29569	0.0216938	0.273552	FALSE
SLC16A11	60.7143	0.778353	0.339126	2.29518	0.021723	0.273766	FALSE
KRT8P8	3.61976	-0.983813	0.428783	-2.29443	0.0217658	0.274151	FALSE
ABCA4	22.0203	0.678131	0.295633	2.29383	0.0218001	0.274226	FALSE
ARMC4	64.9884	-0.670529	0.292446	-2.29283	0.0218578	0.274226	FALSE
CD58	98.9436	-0.346417	0.151065	-2.29317	0.0218385	0.274226	FALSE
LIMS2	180.066	0.772372	0.336677	2.29411	0.0217844	0.274226	FALSE
LNX1	692.799	-0.403437	0.175944	-2.29298	0.0218492	0.274226	FALSE
PCDHB2	1592.67	-0.473769	0.20661	-2.29306	0.0218445	0.274226	FALSE
TRIM5	790.241	-0.389126	0.169659	-2.29358	0.0218147	0.274226	FALSE
ZNF593	312.139	0.730556	0.318656	2.29262	0.0218699	0.274226	FALSE
C4orf36	73.05	-0.399491	0.17428	-2.29223	0.0218921	0.274258	FALSE
HMGCS2	4493.95	-0.71364	0.311341	-2.29215	0.021897	0.274258	FALSE
GNLY	2.53682	1.07943	0.471056	2.29151	0.0219342	0.27457	FALSE
ADAMTS5	144.071	0.857441	0.374235	2.29118	0.021953	0.274652	FALSE
DCBLD2	2968.21	-0.506716	0.221208	-2.29068	0.0219821	0.274862	FALSE
FBXO2	985.012	0.708235	0.309246	2.2902	0.0220098	0.275055	FALSE
ACSM3	1591.9	-0.556271	0.242969	-2.28948	0.0220516	0.275424	FALSE
KIF18A	336.338	-0.481073	0.210182	-2.28884	0.0220887	0.275733	FALSE
EBI3	14.3648	0.908401	0.397027	2.28801	0.0221371	0.276182	FALSE
GALC	4360.62	-0.533214	0.2331	-2.28749	0.0221674	0.276406	FALSE
NTNG1	62.6812	0.700303	0.306201	2.28707	0.0221917	0.276555	FALSE
ASAP2	2111.82	-0.431421	0.188663	-2.28673	0.0222115	0.276647	FALSE
GEMIN8P4	82.4001	0.518861	0.226942	2.28632	0.0222358	0.276797	FALSE
LHX4	118.946	0.858526	0.37558	2.28587	0.022262	0.276968	FALSE
XXbac-BPG299F13.17	30.5372	-0.545454	0.238657	-2.28552	0.0222826	0.276972	FALSE
ZC3H12B	205.362	-0.412769	0.180608	-2.28544	0.0222871	0.276972	FALSE
ARID3C	68.1922	0.650209	0.284593	2.2847	0.0223304	0.277106	FALSE
BID	489.246	0.538783	0.235909	2.28386	0.0223795	0.277106	FALSE
CARMIL3	125.324	0.638885	0.279706	2.28413	0.022364	0.277106	FALSE
CCDC160	115.592	-0.42304	0.185151	-2.28484	0.0223222	0.277106	FALSE
DSG2	7907.25	-0.572989	0.250816	-2.2845	0.0223422	0.277106	FALSE
LINC00877	18.2624	0.61239	0.268128	2.28394	0.0223749	0.277106	FALSE
ZNF880	347.617	-0.354179	0.155085	-2.28378	0.0223846	0.277106	FALSE
APOBEC3B	177.401	0.507152	0.222106	2.28338	0.0224083	0.277122	FALSE
CPSF1P1	32.5882	0.682424	0.298872	2.28333	0.0224108	0.277122	FALSE
ASNS	1680.36	0.448558	0.196557	2.28208	0.0224847	0.277664	FALSE
EML1	1001.04	-0.464047	0.203352	-2.28198	0.0224904	0.277664	FALSE
NOSTRIN	39.7833	0.680893	0.298382	2.28195	0.0224923	0.277664	FALSE
RP3-497J21.1	4.62874	-0.886876	0.388683	-2.28175	0.0225042	0.277664	FALSE
RGAG4	746.36	0.471629	0.206737	2.28129	0.022531	0.277841	FALSE
HBP1	1991.4	-0.319181	0.139945	-2.28076	0.0225628	0.27808	FALSE
KLHL29	344.64	0.633905	0.27799	2.28032	0.0225889	0.278249	FALSE
CDC7	624.566	-0.4665	0.204635	-2.27967	0.0226274	0.278272	FALSE
GMDS-AS1	151.152	-0.382616	0.16784	-2.27965	0.0226282	0.278272	FALSE
STAT4	504.69	-0.517593	0.227017	-2.27998	0.022609	0.278272	FALSE
ZNF844	522.874	-0.380562	0.166989	-2.27897	0.0226691	0.278621	FALSE
GC	165.167	0.924123	0.405615	2.27833	0.0227072	0.278936	FALSE
PCP4L1	31.6555	0.805714	0.353746	2.27766	0.0227468	0.27927	FALSE
ZNF598	788.564	0.326328	0.143311	2.27707	0.0227821	0.27955	FALSE
AL035610.1	7.41292	1.07287	0.471314	2.27633	0.0228261	0.279936	FALSE
RCSD1	6.23952	1.07554	0.472565	2.27596	0.0228486	0.280059	FALSE
SNAP91	49.358	0.715138	0.314396	2.27464	0.0229276	0.280872	FALSE
AC006277.2	11.9758	0.68407	0.300909	2.27335	0.0230052	0.28133	FALSE
ARID4B	2485.44	-0.437962	0.192721	-2.27252	0.0230554	0.28133	FALSE
CARD19	290.723	0.599884	0.264017	2.27214	0.0230782	0.28133	FALSE
CHMP1B2P	347.284	-0.653804	0.287647	-2.27294	0.0230299	0.28133	FALSE
HEY2	127.472	-0.633634	0.278855	-2.27227	0.02307	0.28133	FALSE
KIAA1257	64.7085	-0.45924	0.202064	-2.27274	0.0230418	0.28133	FALSE
MAPK3	1001.78	0.58828	0.258789	2.2732	0.0230138	0.28133	FALSE
ZMYM5	437.331	-0.455594	0.200494	-2.27236	0.0230649	0.28133	FALSE
ZNF189	1278.97	-0.379814	0.167114	-2.27279	0.0230391	0.28133	FALSE
CPLX1	143.724	0.878945	0.386939	2.27154	0.0231146	0.281401	FALSE
LINC00523	3.58413	1.03386	0.455163	2.27142	0.0231218	0.281401	FALSE
USP18	34.1375	0.636123	0.280019	2.27172	0.0231037	0.281401	FALSE
PDHB	2391.49	0.373472	0.164481	2.27062	0.0231702	0.281837	FALSE
ARMCX5-GPRASP2	122.716	-0.42314	0.186556	-2.26816	0.0233192	0.281899	FALSE
ATP2A3	2276.89	0.670973	0.295852	2.26793	0.0233335	0.281899	FALSE
ATP8B1	899.216	-0.575032	0.253463	-2.26871	0.0232862	0.281899	FALSE
EGR2	16.5988	-0.973887	0.429385	-2.2681	0.0233234	0.281899	FALSE
ELF4	435.571	-0.560992	0.247161	-2.26974	0.0232232	0.281899	FALSE
GHRHR	6.47617	0.945216	0.416436	2.26978	0.0232211	0.281899	FALSE
ITGA11	30.6083	0.996611	0.439357	2.26834	0.0233085	0.281899	FALSE
MAT2B	1415.79	-0.336767	0.148497	-2.26784	0.0233392	0.281899	FALSE
MPST	1690.76	0.648528	0.285853	2.26875	0.0232836	0.281899	FALSE
PAUPAR	4.36821	0.928526	0.40942	2.2679	0.023335	0.281899	FALSE
PLEKHG6	726.165	0.448839	0.197797	2.26919	0.0232566	0.281899	FALSE
RTN4RL2	55.8683	0.795811	0.350723	2.26906	0.0232649	0.281899	FALSE
SPAG5-AS1	14.5724	0.933761	0.411608	2.26857	0.0232946	0.281899	FALSE
SLC44A1	2380.55	-0.420392	0.185562	-2.26551	0.0234814	0.283464	FALSE
ATP13A5	3.95989	-1.01668	0.449167	-2.26349	0.0236058	0.283752	FALSE
CORO7	277.278	0.710294	0.313786	2.26363	0.0235971	0.283752	FALSE
CSH2	2.46456	1.0755	0.475045	2.26399	0.0235747	0.283752	FALSE
EXTL2	1339.06	-0.337269	0.14899	-2.2637	0.0235928	0.283752	FALSE
FERMT3	26.8111	0.694792	0.306821	2.26448	0.0235444	0.283752	FALSE
LINC01558	9.80428	0.942363	0.416293	2.2637	0.0235923	0.283752	FALSE
TERF1	655.15	-0.405012	0.178934	-2.26347	0.0236069	0.283752	FALSE
ZNF429	444.436	-0.530989	0.234555	-2.26382	0.0235854	0.283752	FALSE
ENPP7P11	26.6913	-0.58337	0.257764	-2.2632	0.0236236	0.283801	FALSE
MYZAP	68.5562	0.58126	0.256936	2.26227	0.0236806	0.284332	FALSE
ARMC3	619.709	-0.618108	0.27339	-2.2609	0.0237652	0.285195	FALSE
STAT1	13758.6	-0.557484	0.246693	-2.25983	0.0238321	0.285845	FALSE
CARD11	480.804	0.495942	0.219513	2.25928	0.0238659	0.285944	FALSE
MAP4K2	323.209	0.482961	0.213749	2.25947	0.023854	0.285944	FALSE
CTXN2	6.26574	0.881872	0.390713	2.25708	0.0240028	0.287212	FALSE
DAG1	7455.44	-0.388634	0.172218	-2.25664	0.0240306	0.287212	FALSE
GARS	3109.3	0.342291	0.151701	2.25635	0.0240488	0.287212	FALSE
PLEKHA7	1384.84	-0.43274	0.191771	-2.25655	0.0240364	0.287212	FALSE
TMEFF2	28.2065	-0.686269	0.304071	-2.25693	0.0240121	0.287212	FALSE
TNFAIP3	924.778	-0.540951	0.239695	-2.25683	0.0240185	0.287212	FALSE
RP11-116O18.1	17.7633	-0.823346	0.364972	-2.25591	0.024076	0.287383	FALSE
AC108142.1	74.0012	-0.561511	0.2491	-2.25416	0.024186	0.287444	FALSE
ASXL3	514.632	-0.486766	0.216294	-2.25048	0.0244186	0.287444	FALSE
CDKN2A	24.9637	1.06841	0.473941	2.2543	0.0241771	0.287444	FALSE
CELF2	938.888	-0.466671	0.207306	-2.25113	0.0243775	0.287444	FALSE
CHGB	915.707	0.717418	0.318773	2.25056	0.0244133	0.287444	FALSE
CTNND2	3034.93	-0.381378	0.169221	-2.25373	0.0242129	0.287444	FALSE
ENG	30.8379	0.829583	0.36834	2.25222	0.0243083	0.287444	FALSE
FAM173A	329.917	0.765572	0.339893	2.25239	0.0242974	0.287444	FALSE
KDR	202.776	0.78297	0.347707	2.25181	0.024334	0.287444	FALSE
KRT18P59	7.56629	-0.796835	0.353461	-2.25438	0.0241722	0.287444	FALSE
LGI4	39.7416	1.02466	0.454821	2.25288	0.0242667	0.287444	FALSE
NMT2	1050.57	-0.27774	0.123412	-2.25051	0.0244163	0.287444	FALSE
NPIPB5	54.6023	-0.88905	0.394832	-2.25172	0.0243401	0.287444	FALSE
PAPSS1	4324.87	-0.274174	0.121721	-2.25247	0.0242924	0.287444	FALSE
PAX6	812.497	0.689305	0.306059	2.25219	0.02431	0.287444	FALSE
RABL3	525.343	-0.422445	0.187532	-2.25265	0.0242813	0.287444	FALSE
RGS19	99.3196	0.591656	0.262702	2.25219	0.0243101	0.287444	FALSE
RP11-551L14.4	26.7107	0.662679	0.294363	2.25123	0.0243708	0.287444	FALSE
SMC3	5703.47	-0.494923	0.219907	-2.2506	0.024411	0.287444	FALSE
SNTA1	168.083	0.66626	0.29592	2.25149	0.0243545	0.287444	FALSE
SPATA16	4.07036	1.00532	0.445823	2.25497	0.0241355	0.287444	FALSE
TET1	1040.92	-0.739658	0.328365	-2.25255	0.0242876	0.287444	FALSE
TRNP1	1195.78	0.405433	0.180166	2.25033	0.0244283	0.287444	FALSE
TTBK1	130.048	0.549065	0.243794	2.25217	0.0243116	0.287444	FALSE
TTC30A	572.75	-0.473236	0.210063	-2.25283	0.0242698	0.287444	FALSE
TXK	17.8602	0.62786	0.278904	2.25117	0.0243748	0.287444	FALSE
ZNF19	280.305	-0.345378	0.153172	-2.25484	0.0241436	0.287444	FALSE
LRRC25	3.64032	1.06832	0.474821	2.24994	0.0244527	0.28758	FALSE
RPS15AP1	42.8117	1.04097	0.462735	2.24959	0.0244747	0.287583	FALSE
SULT1A1	102.284	0.64787	0.288002	2.24953	0.0244787	0.287583	FALSE
ITPR3	4558.78	-0.512784	0.228025	-2.24881	0.0245247	0.287853	FALSE
MYCT1	6.53556	1.05196	0.467902	2.24824	0.024561	0.287853	FALSE
NDUFS7	905.398	0.726654	0.323144	2.2487	0.0245318	0.287853	FALSE
PROZ	25.6582	0.725331	0.322633	2.24816	0.024566	0.287853	FALSE
THUMPD3	1177.26	-0.196598	0.0874337	-2.24853	0.0245422	0.287853	FALSE
FLNB-AS1	7.55594	-0.830248	0.369417	-2.24746	0.0246109	0.288084	FALSE
PITRM1-AS1	5.91359	0.803557	0.357574	2.24724	0.0246244	0.288084	FALSE
ZNF415	415.361	-0.336308	0.149641	-2.24743	0.0246125	0.288084	FALSE
FAM155A	236.094	0.563369	0.250746	2.24678	0.0246543	0.288283	FALSE
LINC00310	3.55629	-0.936635	0.417057	-2.24582	0.0247156	0.288698	FALSE
RALY-AS1	27.7525	-0.527894	0.235037	-2.246	0.0247037	0.288698	FALSE
LCN15	19.1861	1.06425	0.474012	2.2452	0.0247552	0.288858	FALSE
RP11-347E10.1	3.4358	0.936328	0.417033	2.24521	0.0247544	0.288858	FALSE
REEP6	738.836	0.82226	0.36631	2.24471	0.0247867	0.289075	FALSE
RP11-60A8.1	5.84819	0.945862	0.421412	2.24451	0.0247996	0.289075	FALSE
PKD1L1	28.2168	-0.594372	0.264873	-2.24399	0.0248331	0.289314	FALSE
FAM89A	250.005	0.357803	0.15947	2.2437	0.0248518	0.289382	FALSE
DNAJC19P9	4.92403	-0.916084	0.408357	-2.24334	0.0248749	0.289499	FALSE
CHST9	1598.1	-0.580028	0.258649	-2.24253	0.024927	0.289955	FALSE
ARPC1B	643.103	0.551468	0.245965	2.24206	0.0249577	0.29001	FALSE
C8A	7.87824	0.927941	0.413863	2.24215	0.0249519	0.29001	FALSE
FAT3	2702.07	-0.805585	0.3594	-2.24147	0.0249956	0.2903	FALSE
RRAS	202.584	0.807988	0.360531	2.24111	0.0250191	0.290422	FALSE
LRRC4	1307.69	-0.447796	0.199846	-2.2407	0.0250454	0.290576	FALSE
QRSL1	571.427	-0.295145	0.131753	-2.24015	0.0250814	0.290723	FALSE
SMC5-AS1	22.0064	-0.523512	0.2337	-2.24011	0.0250841	0.290723	FALSE
ATOH1	13.6915	1.01071	0.451505	2.23853	0.0251867	0.290901	FALSE
COX5A	1884.86	0.58676	0.262008	2.23947	0.0251254	0.290901	FALSE
F10	2235.6	0.578042	0.258119	2.23944	0.0251272	0.290901	FALSE
LSM10	547.612	0.608139	0.271644	2.23874	0.0251731	0.290901	FALSE
PHKB	2194.28	-0.27128	0.121164	-2.23894	0.0251597	0.290901	FALSE
PRPH2	13.2249	0.820196	0.36641	2.23847	0.0251905	0.290901	FALSE
TSPAN8	11.8265	0.789143	0.35244	2.23908	0.0251505	0.290901	FALSE
LOXL2	632.644	0.43898	0.196139	2.23811	0.0252137	0.291018	FALSE
CXorf57	644.491	0.616404	0.275737	2.23548	0.0253862	0.292858	FALSE
AGBL2	128.429	-0.569496	0.254841	-2.23471	0.0254363	0.293285	FALSE
ADAMTS16	742.391	-0.523576	0.234336	-2.2343	0.0254636	0.293448	FALSE
ADGRG4	2.60286	1.06063	0.474889	2.23343	0.0255207	0.293954	FALSE
PDCL	845.485	-0.287145	0.128588	-2.23306	0.025545	0.294084	FALSE
CHST7	49.2935	0.603498	0.270388	2.23197	0.0256172	0.294365	FALSE
CLPX	1363.15	-0.343003	0.153667	-2.23212	0.0256068	0.294365	FALSE
GGPS1	1296.43	-0.205513	0.09208	-2.23189	0.0256221	0.294365	FALSE
SLC2A6	265.73	0.610158	0.273336	2.23226	0.0255976	0.294365	FALSE
INSIG2	1040.63	-0.598334	0.268163	-2.23123	0.0256661	0.294718	FALSE
METTL26	631.959	0.795976	0.356797	2.23089	0.0256882	0.294821	FALSE
FAM161A	416.122	-0.52396	0.234999	-2.22963	0.0257721	0.295276	FALSE
NGF	84.671	0.488496	0.219106	2.2295	0.0257807	0.295276	FALSE
SNHG18	221.745	0.782446	0.350941	2.22956	0.0257764	0.295276	FALSE
XPO1	6058.65	-0.451799	0.202635	-2.22962	0.0257727	0.295276	FALSE
RP11-563J2.2	12.4822	-0.852736	0.382634	-2.2286	0.0258407	0.295661	FALSE
SPATS2L	4590.72	-0.23715	0.106408	-2.22868	0.0258353	0.295661	FALSE
C1orf127	37.2152	0.669704	0.300532	2.2284	0.0258541	0.295662	FALSE
CLHC1	242.183	-0.442578	0.198655	-2.22787	0.0258892	0.295762	FALSE
OR51E1	430.886	0.576272	0.258652	2.22798	0.0258818	0.295762	FALSE
EPB41L4A	729.04	-0.383266	0.17215	-2.22635	0.0259909	0.296469	FALSE
GPSM3	339.145	0.620092	0.278503	2.22652	0.0259796	0.296469	FALSE
RP11-500C11.3	16.3429	0.784072	0.35215	2.22652	0.0259791	0.296469	FALSE
SERPINA10	28.4648	0.708673	0.318382	2.22586	0.0260238	0.296693	FALSE
ITGAL	13.0117	0.765592	0.344033	2.22535	0.0260579	0.296789	FALSE
snoU109	4.67781	-0.966046	0.434113	-2.22533	0.0260588	0.296789	FALSE
NDUFAF2	144.529	0.53502	0.24051	2.22452	0.0261135	0.297119	FALSE
SCN10A	3.17323	1.02159	0.459244	2.22451	0.0261144	0.297119	FALSE
CD164L2	9.7351	0.936283	0.421127	2.22328	0.026197	0.297264	FALSE
DGKZP1	8.73727	0.747045	0.335909	2.22395	0.0261518	0.297264	FALSE
GPR148	10.9721	0.853664	0.383959	2.22332	0.0261944	0.297264	FALSE
LINC01529	6.0714	0.893656	0.401898	2.22359	0.0261761	0.297264	FALSE
TMEM67	847.141	-0.491569	0.221135	-2.22293	0.0262202	0.297264	FALSE
TRIB3	256.918	0.639395	0.287628	2.22299	0.0262162	0.297264	FALSE
YTHDC1	3858.41	-0.211628	0.0951615	-2.22388	0.0261562	0.297264	FALSE
LHFPL1	46.4081	-0.559562	0.251747	-2.22272	0.0262348	0.297279	FALSE
ADAMTS15	63.3676	-0.642124	0.28898	-2.22204	0.0262806	0.297346	FALSE
BDNF-AS	56.3698	-0.425164	0.191334	-2.2221	0.0262765	0.297346	FALSE
PLPPR2	591.567	0.506195	0.227795	2.22215	0.0262733	0.297346	FALSE
EXTL1	88.8606	0.468843	0.211021	2.22178	0.0262979	0.297391	FALSE
MAP3K1	2002.91	-0.641821	0.288989	-2.22092	0.0263566	0.297904	FALSE
ADAM10	4597.62	-0.564667	0.254296	-2.22051	0.0263841	0.298029	FALSE
NR2C2AP	140.165	0.498756	0.224628	2.22036	0.0263943	0.298029	FALSE
BOLA2B	3.43798	1.03882	0.468186	2.21881	0.0264993	0.298913	FALSE
LRRC29	35.0517	0.721501	0.325154	2.21895	0.0264899	0.298913	FALSE
RCL1	273.542	0.289275	0.130402	2.21833	0.0265323	0.299134	FALSE
ACADS	443.225	0.616226	0.277943	2.21709	0.0266166	0.299608	FALSE
AGA	456.145	-0.228937	0.103285	-2.21655	0.0266537	0.299608	FALSE
AGO4	1589.38	-0.485349	0.218934	-2.21687	0.0266319	0.299608	FALSE
CPEB3	135.585	-0.572416	0.258173	-2.21718	0.0266108	0.299608	FALSE
DISP3	268.157	0.648787	0.292729	2.21634	0.0266681	0.299608	FALSE
RASSF9	114.617	-0.680486	0.306993	-2.21662	0.026649	0.299608	FALSE
STRA6	347.144	0.680619	0.307073	2.21647	0.0266593	0.299608	FALSE
C14orf37	851.925	-0.576293	0.260243	-2.21444	0.0267983	0.300919	FALSE
LASP1	10161.8	-0.26057	0.117702	-2.21382	0.0268414	0.3011	FALSE
SEC23B	2196.73	0.257515	0.116319	2.21387	0.0268375	0.3011	FALSE
RGS6	532.043	-0.468536	0.211677	-2.21344	0.0268671	0.301238	FALSE
CCP110	662.991	-0.556182	0.251298	-2.21324	0.026881	0.301242	FALSE
MGME1	573.884	-0.367638	0.166208	-2.21191	0.0269728	0.302034	FALSE
NFATC2	644.318	-0.475308	0.214894	-2.21183	0.0269787	0.302034	FALSE
MFAP4	237.108	0.556021	0.251435	2.2114	0.0270085	0.302216	FALSE
FER1L4	108.596	0.826449	0.373806	2.21091	0.0270424	0.302445	FALSE
[truncated: 20,355 more rows]

## Sheet: S4-1B
LINC00261 sORF #	Clone	sgRNAs #	Size of deletion	Genomic coordinates of deletion (hg38)	microprotein sequence
LINC00261-sORF1/2-FS	WT sORF1	1+2	NA		MRGCLGSEQSASSLRELDAPQPARQPARRPPQESLDKDQLNHR*
	clone 1	1+2	61 bp	chr20:22,578,499-22,578,559	MRGCLGSEQSASSLRGPPGDRARLPSSASAPHSCPLTAPPPASPSPFQGSDARAGLAGGKLSQLRLKALGFFAGGSESA*
	WT sORF2	1+2	NA		MPRLGAVGLLPPRAGRSAARPPAGPPAAAGIPG*
	clone 1	1+2	61 bp	chr20:22,578,499-22,578,559	MPRLGAVGLLPPRPTRGPRPAPLLSVRTPLLSAHR*
LINC00261-sORF3-FS	WT	1+2	NA		MDFTSGLWLHQFTGNGIKMVQLRHDH*
	clone 1	1+2	2 bp	chr20:22,566,706-22,566,707	MDFTSSLASSIHRSVCRDSGMLFLVYLSQSTAGINHF*
			7 bp	chr20:22,566,702-22,566,708	MDFTSGFINSQVSVQRFWDAVPGLSESIHSRY*
	clone 2	1+2	7 bp	chr20:22,566,702-22,566,708	MDFTSGTSGAEILGCCSWFI*
LINC00261-sORF4-FS	WT	1+2	NA		MVLRPLSKTFSSMSRFLCGNSDTCSGVLSFLRELKGYKAPENVLYAG*
	clone 1	1+2	2 bp	chr20:22,564,904-22,564,905	MVLRPLSKTFSSMQVSLWK*
			5 bp	chr20:22,564,904-22,564,905	MVLRPLSKTFSSMVSLWK*
	clone 2	1+2	7 bp	chr20:22,564,905-22,564,911	MVLRPLSKTFSAGFSVEIVTPVLVCCLSSGNLRGTKLLKMFFMLVEALMSLY*
LINC00261-sORF5-FS	WT	1+2	NA		MDQIRLGLTKAESCSHSRHHFCHENIGPFQNMPSGRCSLFKQKSNDCITLLDHILHFL*
	clone 1	1+2	16 bp	chr20:22,564,711-22,564,726	MDQIRLKAVAIQGIISVMKI*
	clone 2	1+2	16 bp	chr20:22,564,711-22,564,726	MDQIRLKAVAIQGIISVMKI*
LINC00261-sORF6-FS	WT	1+2	NA		MVPVQMGAVCEYRAQEKGRRSVNIRNCKILLNQ*
	clone 1	1+2	2 bp	chr20:22,564,300-22,564,301	MVPVQMCCV*
	clone 2	1+2	2 bp	chr20:22,564,300-22,564,301	MVPVQMCCV*
LINC00261-DsORF7	clone 1	1+2	251 bp	chr20:22,560,945-22,561,195	NA
	clone 2	1+2	251 bp	chr20:22,560,945-22,561,195	NA

## Sheet: S4-1C
gene_short_name	baseMean	log2FoldChange	lfcSE	stat	pvalue	padj	differentially_expressed
5S_rRNA	2.34311	-0.19681	0.457066	-0.430594	0.666763	1	FALSE
7SK	0.130452	0.0117623	0.1346	0.0873869	0.930364	1	FALSE
A1BG	17.9893	-0.47443	0.375981	-1.26185	0.207004	1	FALSE
A1BG-AS1	105.258	0.00671898	0.221838	0.0302878	0.975838	1	FALSE
A1CF	998.86	-0.128353	0.411257	-0.3121	0.754965	1	FALSE
A2M	189.862	0.9291	0.45306	2.05072	0.0402939	1	FALSE
A2M-AS1	53.6846	0.0636292	0.261572	0.243256	0.807807	1	FALSE
A2ML1	3.20876	-0.2839	0.44618	-0.636289	0.524588	1	FALSE
A2ML1-AS1	0.206059	-0.0231604	0.1346	-0.172068	0.863384	1	FALSE
A2MP1	0.100191	0	0.1346	0	1	1	FALSE
A3GALT2	4.49472	0.605253	0.448341	1.34998	0.177021	1	FALSE
A4GALT	236.639	0.352612	0.310422	1.13591	0.255993	1	FALSE
A4GNT	5.21966	-0.206706	0.456734	-0.452574	0.650855	1	FALSE
AAAS	1560.89	0.29136	0.266105	1.09491	0.273558	1	FALSE
AACS	1214.34	0.154288	0.127665	1.20854	0.226841	1	FALSE
AACSP1	1.0945	-0.362877	0.400986	-0.904961	0.365486	1	FALSE
AADAC	1.19265	0.0992436	0.30084	0.329888	0.741485	1	FALSE
AADACL2-AS1	0.295016	-0.0660213	0.19676	-0.335542	0.737216	1	FALSE
AADACL3	2.16986	-0.36671	0.455786	-0.804566	0.42107	1	FALSE
AADACL4	4.1874	0.101022	0.455216	0.221922	0.824375	1	FALSE
AADACP1	1.15823	-0.0735071	0.404725	-0.181622	0.855879	1	FALSE
AADAT	473.621	-0.565524	0.242173	-2.33521	0.0195323	1	FALSE
AAED1	347.824	-0.0721746	0.252622	-0.285702	0.775106	1	FALSE
AAGAB	2438.1	0.383811	0.175881	2.18223	0.0290928	1	FALSE
AAK1	1210.4	-0.403853	0.293405	-1.37644	0.168687	1	FALSE
AAMDC	316.086	0.601022	0.381992	1.57339	0.115629	1	FALSE
AAMP	2885.65	0.408995	0.224476	1.822	0.068455	1	FALSE
AANAT	3.92205	0.817508	0.448609	1.82232	0.0684071	1	FALSE
AAR2	1078.4	0.524143	0.24445	2.14417	0.032019	1	FALSE
AARD	15.4273	0.228828	0.414425	0.552158	0.58084	1	FALSE
AARS	3121.83	0.314548	0.176619	1.78094	0.0749225	1	FALSE
AARS2	625.587	-0.175385	0.209018	-0.839093	0.401417	1	FALSE
AARSD1	67.0323	-0.73471	0.341666	-2.15038	0.0315253	1	FALSE
AASDH	599.006	-0.0575045	0.225312	-0.255222	0.798552	1	FALSE
AASDHPPT	2123.48	0.0665491	0.271181	0.245405	0.806143	1	FALSE
AASS	1197.43	-0.729406	0.41093	-1.77501	0.0758961	1	FALSE
AATBC	0.273255	0.0800545	0.134601	0.594755	0.552007	1	FALSE
AATF	1085.06	0.324399	0.234254	1.38482	0.166108	1	FALSE
AATK	349.34	-0.138804	0.23348	-0.594499	0.552178	1	FALSE
AATK-AS1	6.38915	-0.525857	0.443147	-1.18664	0.235368	1	FALSE
AB015752.3	1.86523	0.0142425	0.441176	0.0322831	0.974246	1	FALSE
AB019441.29	21.8391	-0.262387	0.457945	-0.572967	0.566667	1	FALSE
ABALON	4.19456	0.272834	0.455592	0.598857	0.549268	1	FALSE
ABAT	498.574	-0.113727	0.312441	-0.363995	0.715861	1	FALSE
ABC11-4932300O16.1	0.0343393	0	0.134599	0	1	1	FALSE
ABC12-49244600F4.4	16.467	0.271434	0.4152	0.653743	0.513278	1	FALSE
ABC13-47488600E17.1	1.55601	0.268077	0.437342	0.612969	0.539897	1	FALSE
ABC13-47656900H15.1	0.238066	0.00562739	0.144958	0.0388209	0.969033	1	FALSE
ABC14-1188822O7.1	1.43173	-0.487247	0.427615	-1.13945	0.254515	1	FALSE
ABC7-42404400C24.1	0.0807491	0	0.134599	0	1	1	FALSE
ABCA1	2439.93	-0.211936	0.405046	-0.523239	0.600808	1	FALSE
ABCA10	40.3925	-0.640319	0.429116	-1.49218	0.135651	1	FALSE
ABCA11P	56.0172	-0.258343	0.340213	-0.759356	0.447639	1	FALSE
ABCA12	84.4569	-0.0115063	0.397694	-0.0289324	0.976918	1	FALSE
ABCA13	10.9277	-0.0445377	0.458835	-0.0970669	0.922673	1	FALSE
ABCA17P	1.44781	-0.679734	0.437883	-1.55232	0.120585	1	FALSE
ABCA2	1117.36	-0.412489	0.308791	-1.33582	0.181609	1	FALSE
ABCA3	582.831	-0.398307	0.244056	-1.63203	0.102672	1	FALSE
ABCA4	22.0203	0.391379	0.379774	1.03056	0.302748	1	FALSE
ABCA5	1126.27	-0.442288	0.383613	-1.15295	0.24893	1	FALSE
ABCA6	233.352	-0.240884	0.333688	-0.721884	0.470366	1	FALSE
ABCA7	1666.92	-0.349409	0.203952	-1.71319	0.0866778	1	FALSE
ABCA8	48.7782	-0.358207	0.372742	-0.961006	0.336549	1	FALSE
ABCA9	23.7061	-0.28079	0.436421	-0.643393	0.519969	1	FALSE
ABCA9-AS1	1.5165	0.307003	0.416201	0.737633	0.460737	1	FALSE
ABCB1	43.3677	0.212657	0.44413	0.478815	0.63207	1	FALSE
ABCB10	719.379	-0.297231	0.315423	-0.942324	0.346027	1	FALSE
ABCB10P1	0.330756	-0.0935569	0.225986	-0.413995	0.678878	1	FALSE
ABCB11	0.136506	-0.00386975	0.1346	-0.02875	0.977064	1	FALSE
ABCB4	28.0058	0.257615	0.350759	0.73445	0.462674	1	FALSE
ABCB5	0.0708855	0	0.134599	0	1	1	FALSE
ABCB6	72.6956	-0.745334	0.352345	-2.11535	0.0343999	1	FALSE
ABCB7	869.369	0.156389	0.2067	0.756599	0.44929	1	FALSE
ABCB8	641.2	-0.0218053	0.239018	-0.0912288	0.927311	1	FALSE
ABCB9	129.349	0.208756	0.242524	0.860765	0.389367	1	FALSE
ABCC1	1931.98	-0.252971	0.256063	-0.987924	0.32319	1	FALSE
ABCC10	978.751	-0.0458283	0.22822	-0.200808	0.840849	1	FALSE
ABCC11	4.77161	0.0494853	0.444545	0.111317	0.911365	1	FALSE
ABCC12	4.42163	-0.304563	0.45849	-0.664273	0.506516	1	FALSE
ABCC13	0.112275	-0.033578	0.1346	-0.249466	0.803	1	FALSE
ABCC2	30.4802	-0.478028	0.427876	-1.11721	0.263904	1	FALSE
ABCC3	81.2406	-0.209177	0.349639	-0.598266	0.549663	1	FALSE
ABCC4	451.906	-0.112962	0.328562	-0.343806	0.730992	1	FALSE
ABCC5	4404.76	-0.257027	0.319099	-0.805478	0.420544	1	FALSE
ABCC6	186.454	-0.220089	0.276018	-0.797373	0.425235	1	FALSE
ABCC6P1	35.1327	-0.503959	0.318862	-1.58049	0.113994	1	FALSE
ABCC6P2	12.2725	0.166564	0.401079	0.415291	0.677929	1	FALSE
ABCC8	310.067	-0.089523	0.387797	-0.23085	0.817431	1	FALSE
ABCC9	56.0098	0.436073	0.414845	1.05117	0.293181	1	FALSE
ABCD1	351.322	0.150758	0.269104	0.560223	0.575328	1	FALSE
ABCD2	3.67844	0.361736	0.454464	0.795961	0.426055	1	FALSE
ABCD3	1465.04	-0.174236	0.286434	-0.608293	0.542993	1	FALSE
ABCD4	2533.57	-0.134254	0.242881	-0.552756	0.580431	1	FALSE
ABCE1	1399.4	-0.185968	0.306815	-0.606123	0.544433	1	FALSE
ABCF1	2794.35	0.148216	0.262657	0.564296	0.572553	1	FALSE
ABCF2	1214.81	0.23494	0.178563	1.31573	0.188266	1	FALSE
ABCF2P1	0.522032	0.0838633	0.309454	0.271004	0.786388	1	FALSE
ABCF3	1439.23	0.0554964	0.177265	0.31307	0.754227	1	FALSE
ABCG1	169.972	-0.337474	0.285936	-1.18024	0.237905	1	FALSE
ABCG2	327.89	0.10689	0.347868	0.307273	0.758636	1	FALSE
ABCG4	24.3132	-0.647824	0.336835	-1.92327	0.0544462	1	FALSE
ABCG5	0.430621	-0.194029	0.29392	-0.660143	0.509162	1	FALSE
ABCG8	0.814283	0.124964	0.321043	0.389243	0.697097	1	FALSE
ABHD1	5.16244	0.181191	0.439554	0.412216	0.680181	1	FALSE
ABHD10	717.141	0.187259	0.1889	0.991308	0.321535	1	FALSE
ABHD11	767.005	-0.10741	0.348825	-0.307919	0.758144	1	FALSE
ABHD11-AS1	0.645414	0.0942736	0.261858	0.360017	0.718834	1	FALSE
ABHD12	1674.1	0.470212	0.302515	1.55434	0.120103	1	FALSE
ABHD12B	0.904142	-0.0797998	0.366492	-0.217739	0.827632	1	FALSE
ABHD13	1773.45	-0.0459696	0.33899	-0.135608	0.892132	1	FALSE
ABHD14A	180.538	0.647981	0.401813	1.61264	0.106822	1	FALSE
ABHD14A-ACY1	0.467867	0.0112961	0.257954	0.043791	0.965071	1	FALSE
ABHD14B	282.099	0.352463	0.329238	1.07054	0.284376	1	FALSE
ABHD15	551.67	0.133275	0.217999	0.611357	0.540964	1	FALSE
ABHD15-AS1	0.113216	0	0.134599	0	1	1	FALSE
ABHD16A	93.9142	-0.325882	0.268083	-1.2156	0.224136	1	FALSE
ABHD16B	0.66058	0.243651	0.340018	0.716584	0.473631	1	FALSE
ABHD17A	473.551	-0.378584	0.18987	-1.99391	0.0461622	1	FALSE
ABHD17AP1	1.02192	0.139205	0.392429	0.354727	0.722794	1	FALSE
ABHD17AP3	0.660523	0.106426	0.334008	0.318632	0.750006	1	FALSE
ABHD17AP4	0.180984	0	0.1346	0	1	1	FALSE
ABHD17AP5	0.280959	-0.0401655	0.220844	-0.181873	0.855682	1	FALSE
ABHD17AP6	0.110865	-0.00214711	0.1346	-0.0159518	0.987273	1	FALSE
ABHD17B	823.037	-0.32172	0.241704	-1.33105	0.183173	1	FALSE
ABHD17C	304.791	0.0409953	0.248336	0.16508	0.868881	1	FALSE
ABHD18	486.623	-0.526822	0.307439	-1.71358	0.0866056	1	FALSE
ABHD2	4000.02	-0.159695	0.329833	-0.484169	0.628266	1	FALSE
ABHD3	322.677	-0.185648	0.295533	-0.628182	0.529885	1	FALSE
ABHD4	1271.81	0.471048	0.307864	1.53006	0.126003	1	FALSE
ABHD5	191.718	-0.00893185	0.255371	-0.034976	0.972099	1	FALSE
ABHD6	171.772	0.334519	0.21734	1.53915	0.123768	1	FALSE
ABHD8	425.551	0.394635	0.386267	1.02166	0.30694	1	FALSE
ABI1	1512.75	-0.0688173	0.190579	-0.361095	0.718028	1	FALSE
ABI1P1	0.118389	0	0.1346	0	1	1	FALSE
ABI2	3280.71	-0.545484	0.259807	-2.09957	0.0357666	1	FALSE
ABI3	2.72446	0.305705	0.431052	0.709206	0.478197	1	FALSE
ABI3BP	5.15351	-0.193113	0.458774	-0.420933	0.673804	1	FALSE
ABL1	4934.14	0.077412	0.18287	0.423318	0.672064	1	FALSE
ABL2	1206.13	-0.30288	0.272134	-1.11298	0.265715	1	FALSE
ABLIM1	2036.21	-0.459001	0.318364	-1.44175	0.149373	1	FALSE
ABLIM2	139.585	0.174991	0.253264	0.690943	0.489601	1	FALSE
ABLIM3	19.7277	0.409993	0.385996	1.06217	0.28816	1	FALSE
ABO	164.776	-0.132914	0.367595	-0.361578	0.717668	1	FALSE
ABR	2484.07	-0.0474457	0.155001	-0.306099	0.759529	1	FALSE
ABRA	0.0501647	0.0014898	0.134599	0.0110684	0.991169	1	FALSE
ABRACL	1176.72	0.530028	0.266755	1.98694	0.0469286	1	FALSE
ABT1	1107.04	0.545892	0.259396	2.10447	0.0353371	1	FALSE
ABTB1	294.683	-0.0286289	0.340648	-0.0840424	0.933023	1	FALSE
ABTB2	388.388	0.0225354	0.239895	0.0939386	0.925158	1	FALSE
AC000032.2	0.22843	0.0515821	0.134601	0.383224	0.701554	1	FALSE
AC000035.3	0.0701038	0.00129787	0.134599	0.0096425	0.992307	1	FALSE
AC000041.10	0.156062	-0.00554632	0.1346	-0.0412059	0.967132	1	FALSE
AC000068.10	5.69266	-0.351957	0.433081	-0.812683	0.4164	1	FALSE
AC000068.5	29.4553	-0.196238	0.3731	-0.525966	0.598912	1	FALSE
AC000068.9	8.20206	-0.232091	0.405724	-0.572042	0.567293	1	FALSE
AC000081.2	0.189567	0	0.1346	0	1	1	FALSE
AC000089.3	4.65721	0.532489	0.453534	1.17409	0.24036	1	FALSE
AC000095.12	3.87548	0.450533	0.446828	1.00829	0.313314	1	FALSE
AC000095.9	4.44675	-0.217517	0.45824	-0.474679	0.635016	1	FALSE
AC000111.4	0.111661	0.0134387	0.1346	0.0998422	0.92047	1	FALSE
AC000111.6	0.0772378	0	0.134599	0	1	1	FALSE
AC000120.7	7.34823	-0.0166737	0.459267	-0.036305	0.971039	1	FALSE
AC000123.2	63.2524	-0.257307	0.447162	-0.575423	0.565006	1	FALSE
AC000123.3	13.2682	0.376803	0.442774	0.851004	0.394767	1	FALSE
AC000124.1	0.11154	0	0.1346	0	1	1	FALSE
AC000367.1	0.485919	-0.189163	0.277589	-0.681449	0.495587	1	FALSE
AC000403.4	25.0463	-0.269356	0.368495	-0.730962	0.464802	1	FALSE
AC001226.7	1.05029	-0.440554	0.420658	-1.0473	0.294963	1	FALSE
AC002044.1	10.566	0.249689	0.402431	0.62045	0.534961	1	FALSE
AC002044.3	1.04854	0.176847	0.30947	0.571451	0.567694	1	FALSE
AC002044.4	4.28437	0.318452	0.4103	0.776143	0.437664	1	FALSE
AC002056.3	1.7163	-0.890268	0.462168	-1.92629	0.0540687	1	FALSE
AC002059.10	2.67582	-1.41287	0.466802	-3.0267	0.00247241	1	FALSE
AC002064.5	3.43401	0.0911217	0.454015	0.200702	0.840932	1	FALSE
AC002064.7	0.179038	0	0.1346	0	1	1	FALSE
AC002066.1	0.904306	-0.411807	0.39089	-1.05351	0.292106	1	FALSE
AC002069.5	0.605407	0.213142	0.293996	0.724984	0.468462	1	FALSE
AC002075.4	2.68062	-0.0356904	0.451955	-0.078969	0.937057	1	FALSE
AC002076.10	0.6136	0.200663	0.341278	0.587975	0.556549	1	FALSE
AC002115.5	0.253907	-0.0258702	0.1346	-0.1922	0.847586	1	FALSE
AC002115.9	0.0390681	0	0.134599	0	1	1	FALSE
AC002116.7	4.76821	-0.311517	0.451021	-0.690694	0.489758	1	FALSE
AC002117.1	18.8018	-0.705493	0.398019	-1.77251	0.07631	1	FALSE
AC002127.4	0.0643806	0	0.134599	0	1	1	FALSE
AC002306.1	0.0612088	0	0.134599	0	1	1	FALSE
AC002310.10	1.25263	-0.329589	0.404275	-0.815259	0.414924	1	FALSE
AC002310.12	38.7901	0.224925	0.322121	0.698263	0.485013	1	FALSE
AC002310.14	5.6312	-0.347499	0.438956	-0.79165	0.428565	1	FALSE
AC002310.7	4.99207	-0.222982	0.456886	-0.488047	0.625517	1	FALSE
AC002368.4	0.778657	-0.14554	0.325432	-0.447221	0.654716	1	FALSE
AC002398.11	0.898692	0.0696416	0.331974	0.209781	0.833839	1	FALSE
AC002398.12	0.354367	-0.0747043	0.203443	-0.367201	0.713469	1	FALSE
AC002398.13	0.309137	0.0251389	0.152893	0.164421	0.8694	1	FALSE
AC002400.1	0.186629	0.0236069	0.1346	0.175385	0.860777	1	FALSE
AC002401.1	1.59736	0.412854	0.426244	0.968585	0.332752	1	FALSE
AC002429.4	0.0402889	0	0.134599	0	1	1	FALSE
AC002429.5	0.052224	0.00129787	0.134599	0.0096425	0.992307	1	FALSE
AC002451.3	3.1782	0.120011	0.454155	0.264251	0.791587	1	FALSE
AC002454.1	35.0586	0.45195	0.412568	1.09546	0.273317	1	FALSE
AC002456.2	7.19833	-0.432435	0.437585	-0.98823	0.32304	1	FALSE
AC002467.7	57.2314	0.609359	0.307478	1.9818	0.0475018	1	FALSE
AC002472.11	0.200351	-0.0233734	0.1346	-0.173651	0.86214	1	FALSE
AC002480.3	79.0454	-0.0182572	0.31687	-0.0576172	0.954054	1	FALSE
AC002480.4	2.71352	-0.256286	0.45806	-0.559504	0.575818	1	FALSE
AC002480.5	0.649464	-0.168826	0.360185	-0.468721	0.639269	1	FALSE
AC002486.3	0.439662	-0.0982642	0.269658	-0.364403	0.715557	1	FALSE
AC002511.2	1.1417	-0.039597	0.426684	-0.0928015	0.926061	1	FALSE
AC002511.3	2.12277	0.461817	0.447421	1.03217	0.30199	1	FALSE
AC002519.6	0.586919	-0.498402	0.347795	-1.43304	0.151848	1	FALSE
AC002519.8	2.70531	-0.0648825	0.437071	-0.148448	0.881989	1	FALSE
AC002539.1	0.161591	-0.0369772	0.1346	-0.274719	0.783532	1	FALSE
AC002550.5	0.814862	0.142231	0.336903	0.422173	0.672899	1	FALSE
AC002550.6	11.846	0.364069	0.396751	0.917625	0.358815	1	FALSE
AC002551.1	1.03133	0.0939297	0.307031	0.305929	0.759659	1	FALSE
AC002553.4	0.0575413	0.00129787	0.134599	0.0096425	0.992307	1	FALSE
AC002984.2	0.197175	0	0.1346	0	1	1	FALSE
AC003002.6	3.91974	0.322928	0.453281	0.712424	0.476202	1	FALSE
AC003003.5	0.241646	-0.054989	0.1346	-0.408536	0.68288	1	FALSE
AC003005.2	1.60297	0.214563	0.429153	0.49997	0.617096	1	FALSE
AC003009.1	0.128222	-0.00385995	0.1346	-0.0286772	0.977122	1	FALSE
AC003075.4	3.65316	0.149579	0.453643	0.329728	0.741606	1	FALSE
AC003080.4	0.743218	0.0435397	0.343191	0.126867	0.899045	1	FALSE
AC003084.2	0.06059	0.00134403	0.134599	0.00998544	0.992033	1	FALSE
AC003088.1	1.28737	-0.417771	0.415994	-1.00427	0.315248	1	FALSE
AC003090.1	1.9383	0.0344895	0.44056	0.0782856	0.937601	1	FALSE
AC003092.1	0.617333	-0.0132885	0.313191	-0.0424293	0.966156	1	FALSE
AC003104.1	4.18826	0.240671	0.451861	0.532622	0.594295	1	FALSE
AC003664.1	0.111332	0	0.1346	0	1	1	FALSE
AC003682.16	6.1388	-0.585344	0.460984	-1.26977	0.204167	1	FALSE
AC003973.3	0.219004	0	0.1346	0	1	1	FALSE
AC003984.1	0.137176	0.0117161	0.1346	0.0870439	0.930637	1	FALSE
AC003986.5	0.0996467	0.0134387	0.1346	0.0998422	0.92047	1	FALSE
AC003986.6	0.0776661	-0.000424565	0.134599	-0.00315428	0.997483	1	FALSE
AC003986.7	0.285623	0	0.150292	0	1	1	FALSE
AC003991.3	0.533406	0.134801	0.295658	0.455937	0.648435	1	FALSE
AC004006.2	0.0770319	0	0.134599	0	1	1	FALSE
AC004012.1	0.139862	0	0.1346	0	1	1	FALSE
AC004019.10	7.16	0.000998074	0.442847	0.00225377	0.998202	1	FALSE
AC004019.13	1.793	0.122443	0.431136	0.284001	0.776409	1	FALSE
AC004051.2	0.137288	0	0.1346	0	1	1	FALSE
AC004053.1	0.913681	-0.234853	0.389391	-0.60313	0.546422	1	FALSE
AC004066.2	0.159554	0	0.1346	0	1	1	FALSE
AC004066.3	0.400531	0	0.208214	0	1	1	FALSE
AC004067.5	1.58178	-0.525328	0.432935	-1.21341	0.224972	1	FALSE
AC004069.2	5.27079	0.242573	0.450789	0.538108	0.590502	1	FALSE
AC004076.5	46.1346	-0.0322501	0.359934	-0.0895999	0.928605	1	FALSE
AC004076.7	0.723376	-0.181003	0.376276	-0.481037	0.63049	1	FALSE
AC004076.9	0.787831	0.141224	0.392718	0.359608	0.71914	1	FALSE
AC004112.4	0.213407	0	0.1346	0	1	1	FALSE
AC004129.7	0.077903	0	0.134599	0	1	1	FALSE
AC004129.9	0.152117	0	0.1346	0	1	1	FALSE
AC004156.3	2.28508	-0.129521	0.450112	-0.287753	0.773536	1	FALSE
AC004158.3	0.172152	0	0.1346	0	1	1	FALSE
AC004160.4	1.12849	0.0102693	0.409574	0.0250731	0.979997	1	FALSE
AC004221.2	4.01903	-0.478396	0.454316	-1.053	0.29234	1	FALSE
AC004231.2	0.972244	-0.0661849	0.405972	-0.163028	0.870496	1	FALSE
AC004257.1	0.32062	-0.0203025	0.152912	-0.132772	0.894374	1	FALSE
AC004381.6	206.333	0.104375	0.258482	0.403802	0.686359	1	FALSE
AC004381.7	0.80856	-0.299592	0.316124	-0.947704	0.34328	1	FALSE
AC004381.8	76.529	0.335131	0.437326	0.766319	0.443487	1	FALSE
AC004383.3	1.83088	-0.622321	0.451325	-1.37887	0.167933	1	FALSE
AC004386.4	3.38366	0.453377	0.445006	1.01881	0.308293	1	FALSE
AC004448.2	0.421073	-0.0147119	0.251316	-0.0585394	0.953319	1	FALSE
AC004448.5	0.549047	0.0204211	0.258414	0.0790245	0.937013	1	FALSE
AC004449.6	1.4256	-0.131271	0.411771	-0.318796	0.749881	1	FALSE
AC004453.8	25.1037	0.170273	0.348426	0.488691	0.62506	1	FALSE
AC004461.4	0.0484559	0	0.134599	0	1	1	FALSE
AC004471.10	0.647634	-0.236766	0.368517	-0.642482	0.52056	1	FALSE
AC004471.9	0.823245	-0.286419	0.394264	-0.726464	0.467554	1	FALSE
AC004490.1	0.585868	0.0577487	0.326062	0.177109	0.859422	1	FALSE
AC004538.3	4.97241	0.616142	0.443899	1.38802	0.16513	1	FALSE
AC004540.4	59.0195	0.401995	0.330996	1.2145	0.224557	1	FALSE
AC004540.5	62.4557	0.157382	0.273963	0.574463	0.565654	1	FALSE
AC004543.2	4.97837	0.0996476	0.456732	0.218175	0.827292	1	FALSE
AC004549.6	1.02813	-0.453455	0.411983	-1.10067	0.271042	1	FALSE
AC004556.1	2.62868	0.087762	0.44788	0.19595	0.844649	1	FALSE
AC004593.3	1.70267	-0.0873722	0.447845	-0.195094	0.845319	1	FALSE
AC004603.4	0.0609609	0	0.134599	0	1	1	FALSE
AC004623.2	0.389312	-0.042623	0.203467	-0.209483	0.834071	1	FALSE
AC004623.3	0.623665	-0.405834	0.306069	-1.32596	0.184854	1	FALSE
AC004637.1	0.0647426	0	0.134599	0	1	1	FALSE
AC004691.5	0.0610039	0	0.134599	0	1	1	FALSE
AC004702.2	0.1432	0	0.1346	0	1	1	FALSE
AC004754.3	14.9321	0.346851	0.410159	0.845649	0.397749	1	FALSE
AC004775.5	0.544123	0.133619	0.32668	0.40902	0.682525	1	FALSE
AC004840.8	0.900385	0.072412	0.37024	0.195581	0.844938	1	FALSE
AC004854.4	0.625282	-0.222363	0.34078	-0.652512	0.514071	1	FALSE
AC004893.10	0.131626	0.0254306	0.1346	0.188935	0.850144	1	FALSE
AC004893.11	129.107	0.639308	0.285817	2.23677	0.0253011	1	FALSE
AC004895.4	0.213592	0.00633456	0.1346	0.047062	0.962464	1	FALSE
AC004899.3	0.0892851	0	0.134599	0	1	1	FALSE
AC004906.3	0.110581	0	0.1346	0	1	1	FALSE
AC004920.2	0.29582	0.0195084	0.151635	0.128654	0.897632	1	FALSE
AC004938.5	0.159851	0	0.1346	0	1	1	FALSE
AC004941.3	0.182347	0.00999335	0.1346	0.0742448	0.940816	1	FALSE
AC004941.5	0.304249	0	0.175772	0	1	1	FALSE
AC004947.2	0.418908	0	0.18221	0	1	1	FALSE
AC004951.5	6.17631	0.433187	0.452264	0.957819	0.338154	1	FALSE
AC004951.6	12.5359	-0.00927038	0.452651	-0.0204802	0.98366	1	FALSE
AC004967.7	62.6866	-0.311098	0.341303	-0.911502	0.362031	1	FALSE
AC004980.10	0.133391	-0.00498854	0.1346	-0.037062	0.970436	1	FALSE
AC004980.7	40.1654	0.0269017	0.363933	0.0739194	0.941074	1	FALSE
AC004985.12	2.6069	-0.225527	0.455495	-0.495124	0.620513	1	FALSE
AC004987.9	29.5539	-0.378044	0.389788	-0.96987	0.332111	1	FALSE
AC005009.1	3.80125	-0.0194245	0.45267	-0.0429109	0.965773	1	FALSE
AC005009.2	7.3114	0.0775268	0.442814	0.175078	0.861019	1	FALSE
AC005013.5	2.93067	-0.15132	0.453869	-0.3334	0.738832	1	FALSE
AC005014.5	3.15366	-0.220517	0.457039	-0.48249	0.629458	1	FALSE
AC005017.2	0.30049	-0.00256407	0.175272	-0.0146291	0.988328	1	FALSE
AC005019.2	4.61302	0.407397	0.377096	1.08035	0.279984	1	FALSE
AC005019.3	0.0677867	0.0151613	0.134599	0.11264	0.910316	1	FALSE
AC005037.3	3.45558	0.35481	0.451327	0.786149	0.43178	1	FALSE
AC005040.3	0.0427699	0	0.134599	0	1	1	FALSE
AC005041.11	0.0988088	-0.00306907	0.1346	-0.0228015	0.981809	1	FALSE
AC005042.2	0.941723	0.00179932	0.346563	0.00519189	0.995857	1	FALSE
AC005042.4	0.369763	0.157159	0.25056	0.62723	0.530509	1	FALSE
AC005062.2	15.2277	0.016564	0.40962	0.0404374	0.967744	1	FALSE
AC005076.5	16.8491	0.600987	0.383206	1.56831	0.116808	1	FALSE
AC005077.14	4.47523	0.265472	0.444416	0.597349	0.550274	1	FALSE
AC005077.7	0.63177	-0.202553	0.308384	-0.656822	0.511295	1	FALSE
AC005082.12	3.73462	-0.556081	0.445493	-1.24824	0.211944	1	FALSE
AC005083.1	286.455	0.505624	0.274278	1.84347	0.0652604	1	FALSE
AC005102.1	0.352098	-0.0557686	0.226227	-0.246516	0.805283	1	FALSE
AC005104.3	0.2244	0	0.1346	0	1	1	FALSE
AC005152.3	2.20215	-0.464502	0.454083	-1.02295	0.306334	1	FALSE
AC005154.6	509.644	-0.402313	0.313548	-1.2831	0.199458	1	FALSE
AC005154.7	16.2166	-0.357074	0.406313	-0.878816	0.379501	1	FALSE
AC005154.8	0.352712	0.0397623	0.226902	0.17524	0.860891	1	FALSE
AC005160.3	0.0455631	0.00134403	0.134599	0.00998544	0.992033	1	FALSE
AC005162.5	0.352037	-0.0684528	0.249273	-0.27461	0.783616	1	FALSE
AC005176.2	0.0770709	0.00130774	0.134599	0.0097158	0.992248	1	FALSE
AC005189.6	0.124503	0.0118084	0.1346	0.0877299	0.930091	1	FALSE
AC005197.2	0.837986	-0.132307	0.368405	-0.359136	0.719494	1	FALSE
AC005220.3	0.38024	0.181708	0.272859	0.665941	0.505449	1	FALSE
AC005224.2	26.8413	0.391744	0.364372	1.07512	0.28232	1	FALSE
AC005229.7	0.202333	-0.00959406	0.139471	-0.0687888	0.945158	1	FALSE
AC005235.1	0.0566015	0	0.134599	0	1	1	FALSE
AC005237.4	0.28072	-0.0404496	0.1346	-0.300516	0.763783	1	FALSE
AC005251.3	5.59034	-0.779334	0.462245	-1.68598	0.0918004	1	FALSE
AC005253.2	1.75483	0.52624	0.43613	1.20661	0.227582	1	FALSE
AC005253.4	0.834054	-0.127101	0.369124	-0.344332	0.730597	1	FALSE
AC005255.3	2.39182	-0.60503	0.455565	-1.32809	0.184149	1	FALSE
AC005256.1	5.51439	-0.156828	0.450595	-0.348046	0.727805	1	FALSE
AC005262.2	0.423022	-0.110113	0.230475	-0.477765	0.632818	1	FALSE
AC005262.3	0.293938	0.0191004	0.149643	0.12764	0.898434	1	FALSE
AC005262.4	5.71395	0.252898	0.402113	0.628923	0.529399	1	FALSE
AC005264.2	0.0583793	0.00129787	0.134599	0.0096425	0.992307	1	FALSE
AC005276.1	0.14192	-0.00386975	0.1346	-0.02875	0.977064	1	FALSE
AC005281.1	0.746147	0.0427019	0.359464	0.118793	0.905439	1	FALSE
AC005281.2	0.0798077	0.012514	0.1346	0.092972	0.925926	1	FALSE
AC005300.5	2.14728	-0.121065	0.416385	-0.290752	0.771241	1	FALSE
AC005301.9	0.0997465	-0.00211644	0.1346	-0.015724	0.987455	1	FALSE
AC005304.1	0.439905	0.0888283	0.291381	0.304853	0.760478	1	FALSE
AC005306.3	88.1359	-0.270944	0.367271	-0.737722	0.460683	1	FALSE
AC005307.1	16.3117	0.409236	0.435591	0.939497	0.347476	1	FALSE
AC005307.3	2.90939	-0.13467	0.453931	-0.296675	0.766715	1	FALSE
AC005307.4	0.195125	0.00718273	0.1346	0.0533634	0.957442	1	FALSE
AC005307.5	9.68958	0.0278162	0.426498	0.06522	0.947999	1	FALSE
AC005329.7	196.292	-0.63213	0.273263	-2.31326	0.0207083	1	FALSE
AC005330.2	0.0862515	0.0134947	0.1346	0.100258	0.920139	1	FALSE
AC005336.4	0.13503	0	0.1346	0	1	1	FALSE
AC005336.5	0.428901	0.0327872	0.249753	0.131278	0.895555	1	FALSE
AC005339.2	1.81861	-0.202491	0.435455	-0.465011	0.641923	1	FALSE
AC005351.1	0.261659	0	0.134601	0	1	1	FALSE
AC005355.1	0.282862	0.0533194	0.173577	0.30718	0.758706	1	FALSE
AC005355.2	12.5894	-0.0866431	0.441773	-0.196126	0.844512	1	FALSE
AC005355.3	0.815539	0.506555	0.337385	1.50142	0.133248	1	FALSE
AC005363.11	1.74986	-0.0115782	0.428441	-0.027024	0.978441	1	FALSE
AC005387.3	0.0693228	-0.000332241	0.134599	-0.00246837	0.998031	1	FALSE
AC005394.1	0.586675	-0.167235	0.272375	-0.613986	0.539225	1	FALSE
AC005477.1	2.26742	0.478837	0.438513	1.09196	0.274852	1	FALSE
AC005480.1	0.369329	0.0640435	0.287032	0.223123	0.82344	1	FALSE
AC005481.5	12.5968	1.36683	0.43676	3.12948	0.00175113	1	FALSE
AC005487.2	0.34056	-0.045712	0.202231	-0.226038	0.821171	1	FALSE
AC005498.3	2.13041	0.243322	0.447689	0.543507	0.586781	1	FALSE
AC005498.4	0.33019	-0.00448893	0.199014	-0.0225558	0.982005	1	FALSE
AC005517.3	2.1755	0.244423	0.392024	0.62349	0.532963	1	FALSE
AC005518.2	0.0408074	0.00129787	0.134599	0.0096425	0.992307	1	FALSE
AC005519.4	153.018	-0.730315	0.366817	-1.99095	0.0464862	1	FALSE
AC005522.6	0.0810878	0.0137748	0.1346	0.102339	0.918488	1	FALSE
AC005523.2	2.39867	0.332235	0.441489	0.752534	0.45173	1	FALSE
AC005523.3	0.52129	-0.0299936	0.299857	-0.100026	0.920323	1	FALSE
AC005532.5	1.38593	0.0999291	0.409524	0.244013	0.807221	1	FALSE
AC005534.6	0.485536	0.0858054	0.315175	0.272247	0.785432	1	FALSE
AC005534.8	3.50975	0.327717	0.451854	0.725271	0.468286	1	FALSE
AC005537.2	0.126493	0.0117721	0.1346	0.0874597	0.930306	1	FALSE
AC005539.2	0.152127	0	0.1346	0	1	1	FALSE
AC005540.3	7.08528	-0.0393029	0.45586	-0.0862171	0.931294	1	FALSE
AC005546.2	3.73091	0.171546	0.452428	0.379169	0.704563	1	FALSE
AC005550.3	0.112036	0	0.1346	0	1	1	FALSE
AC005562.1	24.6252	-0.419203	0.342217	-1.22496	0.22059	1	FALSE
AC005578.3	1.34839	-0.0495884	0.431916	-0.11481	0.908595	1	FALSE
AC005592.1	1.84281	-0.396562	0.451132	-0.879037	0.379381	1	FALSE
AC005592.2	4.80401	0.342612	0.440789	0.77727	0.436999	1	FALSE
AC005592.3	0.604611	-0.0985066	0.329822	-0.298666	0.765195	1	FALSE
AC005593.2	0.888129	0.0782534	0.382359	0.20466	0.837838	1	FALSE
AC005597.1	0.27824	-0.028573	0.19668	-0.145277	0.884492	1	FALSE
AC005606.14	7.45737	0.617972	0.426413	1.44923	0.147273	1	FALSE
AC005606.15	0.523979	0.0904995	0.280083	0.323117	0.746606	1	FALSE
AC005609.16	25.4249	-0.32589	0.436667	-0.746312	0.455479	1	FALSE
AC005609.18	6.41002	-0.364163	0.454275	-0.801637	0.422763	1	FALSE
AC005609.19	0.396176	0.0995199	0.201509	0.493873	0.621396	1	FALSE
AC005609.20	4.82481	0.0286641	0.457625	0.0626368	0.950056	1	FALSE
AC005614.3	0.71474	0.0248616	0.329562	0.0754383	0.939866	1	FALSE
AC005616.1	0.863895	-0.128515	0.380673	-0.3376	0.735665	1	FALSE
AC005618.6	18.6565	-0.21944	0.353297	-0.62112	0.534521	1	FALSE
AC005624.2	1.31343	-0.426573	0.404931	-1.05345	0.292136	1	FALSE
AC005682.5	27.2824	0.164036	0.393461	0.416905	0.676748	1	FALSE
AC005682.6	0.634177	0.0124716	0.331285	0.037646	0.96997	1	FALSE
AC005740.3	0.0929657	0	0.134599	0	1	1	FALSE
AC005740.4	1.66413	0.158897	0.38916	0.408307	0.683048	1	FALSE
AC005740.6	6.07577	0.765969	0.440832	1.73755	0.0822895	1	FALSE
AC005752.10	0.837941	0.137258	0.345552	0.397213	0.69121	1	FALSE
AC005753.1	0.483919	0.284573	0.303483	0.937691	0.348403	1	FALSE
AC005754.7	0.257133	0.0204664	0.134601	0.152053	0.879145	1	FALSE
AC005754.8	40.4983	-0.213227	0.408551	-0.521912	0.601732	1	FALSE
AC005758.1	0.0387543	0.000110224	0.134599	0.000818905	0.999347	1	FALSE
AC005772.2	2.09543	-0.391808	0.43534	-0.900004	0.368118	1	FALSE
AC005775.2	5.102	0.186053	0.443946	0.41909	0.67515	1	FALSE
AC005776.1	4.57138	-0.0887507	0.442602	-0.200521	0.841073	1	FALSE
AC005780.1	0.181968	0.0244754	0.1346	0.181838	0.85571	1	FALSE
AC005785.2	11.8468	-0.551477	0.44782	-1.23147	0.218147	1	FALSE
AC005785.5	22.8829	-0.488551	0.458077	-1.06653	0.286186	1	FALSE
AC005786.3	0.296718	-0.0715112	0.198405	-0.360431	0.718525	1	FALSE
AC005786.5	0.0402509	0	0.134599	0	1	1	FALSE
AC005786.7	20.8707	-0.229957	0.33057	-0.695638	0.486655	1	FALSE
AC005789.9	0.966363	-0.145974	0.388666	-0.375576	0.707232	1	FALSE
AC005795.1	5.98259	-0.129914	0.445532	-0.291592	0.770599	1	FALSE
AC005808.3	0.0499506	0.00129787	0.134599	0.0096425	0.992307	1	FALSE
AC005822.1	3.88285	-0.627288	0.460904	-1.36099	0.173516	1	FALSE
AC005838.2	0.0724107	0	0.134599	0	1	1	FALSE
AC005863.1	0.101381	0	0.1346	0	1	1	FALSE
AC005932.1	15.1948	0.0913184	0.383642	0.23803	0.811858	1	FALSE
AC005943.6	0.468479	0.120574	0.233001	0.517481	0.60482	1	FALSE
AC005944.2	8.25651	0.262102	0.456347	0.574347	0.565733	1	FALSE
AC005954.3	2.46534	-0.462199	0.456365	-1.01278	0.311163	1	FALSE
AC005954.4	0.201661	0.0221796	0.1346	0.164781	0.869116	1	FALSE
AC006000.5	4.03362	-0.454696	0.46058	-0.987225	0.323532	1	FALSE
AC006004.1	0.0510012	0.0168837	0.134599	0.125437	0.900178	1	FALSE
AC006026.13	25.4896	-0.0936304	0.442134	-0.211769	0.832287	1	FALSE
AC006026.9	0.743444	-0.136949	0.358659	-0.381837	0.702582	1	FALSE
AC006028.11	0.201035	-0.00954838	0.139144	-0.0686225	0.94529	1	FALSE
AC006033.22	0.113775	0	0.1346	0	1	1	FALSE
AC006041.1	0.0785531	-0.000378403	0.134599	-0.00281133	0.997757	1	FALSE
AC006042.6	0.131798	0	0.1346	0	1	1	FALSE
AC006042.7	0.94041	-0.123866	0.384082	-0.322499	0.747075	1	FALSE
AC006042.8	5.5095	-0.148403	0.458118	-0.32394	0.745983	1	FALSE
AC006070.12	0.146915	-0.0369843	0.1346	-0.274771	0.783492	1	FALSE
AC006077.3	11.6921	0.619471	0.449113	1.37932	0.167796	1	FALSE
AC006077.4	0.0536155	0	0.134599	0	1	1	FALSE
AC006116.12	0.671789	-0.017288	0.311787	-0.055448	0.955782	1	FALSE
AC006116.13	0.354766	-0.00869016	0.225097	-0.0386063	0.969204	1	FALSE
AC006116.14	0.240652	0.0089687	0.168714	0.0531591	0.957605	1	FALSE
AC006116.15	2.7216	0.762341	0.444369	1.71556	0.0862425	1	FALSE
AC006116.17	5.16069	0.385076	0.449959	0.855803	0.392107	1	FALSE
AC006116.19	1.4163	0.460529	0.392383	1.17367	0.240527	1	FALSE
AC006116.20	3.04511	0.283409	0.453134	0.625443	0.53168	1	FALSE
AC006116.21	0.667209	0.0989029	0.338509	0.292173	0.770155	1	FALSE
AC006116.22	2.67638	0.0108074	0.453048	0.0238548	0.980968	1	FALSE
AC006116.24	6.9007	-0.406269	0.444019	-0.914983	0.360201	1	FALSE
AC006116.27	9.93797	0.0454048	0.418338	0.108536	0.91357	1	FALSE
AC006126.3	0.298359	-0.0687708	0.198065	-0.347213	0.728431	1	FALSE
AC006128.2	16.3985	0.332495	0.434577	0.765101	0.444211	1	FALSE
AC006129.1	0.12087	0	0.1346	0	1	1	FALSE
AC006129.2	0.380956	0.0333571	0.227146	0.146853	0.883248	1	FALSE
AC006159.4	0.337864	0.104442	0.246278	0.424081	0.671507	1	FALSE
AC006160.5	3.9125	0.0592525	0.449028	0.131957	0.895018	1	FALSE
AC006195.2	0.443087	-0.0815487	0.250813	-0.325137	0.745077	1	FALSE
AC006227.1	0.0305317	0	0.134599	0	1	1	FALSE
AC006262.4	0.131639	0	0.1346	0	1	1	FALSE
AC006262.5	0.256338	0.0203372	0.147359	0.138012	0.890231	1	FALSE
AC006262.6	0.612296	0.243509	0.338434	0.719517	0.471822	1	FALSE
AC006272.2	0.499941	-0.042506	0.311971	-0.13625	0.891624	1	FALSE
AC006273.4	10.7051	0.0760086	0.438714	0.173253	0.862452	1	FALSE
AC006273.5	63.1206	-0.294893	0.297307	-0.99188	0.321256	1	FALSE
AC006277.2	11.9758	0.395042	0.38795	1.01828	0.308545	1	FALSE
AC006277.3	0.0604041	0.0141063	0.1346	0.104802	0.916533	1	FALSE
AC006369.2	1.8234	-0.0307605	0.449597	-0.0684179	0.945453	1	FALSE
AC006369.3	0.370504	-0.00413007	0.248333	-0.0166312	0.986731	1	FALSE
AC006372.4	1.85389	0.237202	0.43442	0.54602	0.585052	1	FALSE
AC006372.5	0.327972	-0.0380547	0.199317	-0.190926	0.848584	1	FALSE
AC006372.6	0.31043	-0.039647	0.152595	-0.259819	0.795003	1	FALSE
AC006373.1	0.074329	0	0.134599	0	1	1	FALSE
AC006380.3	0.0816631	-0.000414719	0.134599	-0.00308114	0.997542	1	FALSE
AC006427.2	0.219753	0.00663996	0.1346	0.0493309	0.960656	1	FALSE
AC006445.1	0.12626	0	0.1346	0	1	1	FALSE
AC006445.6	0.0849449	0.0290246	0.1346	0.215636	0.829271	1	FALSE
AC006445.7	0.58785	-0.121271	0.328909	-0.368706	0.712347	1	FALSE
AC006449.2	0.410235	-0.0361435	0.279827	-0.129164	0.897228	1	FALSE
AC006460.2	0.481308	-8.29145e-05	0.277659	-0.00029862	0.999762	1	FALSE
AC006461.2	0.0543724	0	0.134599	0	1	1	FALSE
AC006483.5	0.253483	-0.0435963	0.170585	-0.255569	0.798283	1	FALSE
AC006486.10	1.96644	0.10614	0.451836	0.234908	0.81428	1	FALSE
AC006509.4	0.336476	0.0106722	0.134691	0.0792342	0.936846	1	FALSE
AC006509.7	0.348169	0.0239354	0.179638	0.133242	0.894002	1	FALSE
AC006538.1	33.0491	0.361685	0.34893	1.03656	0.299942	1	FALSE
AC006538.8	0.488531	-0.0708163	0.232624	-0.304424	0.760805	1	FALSE
AC006539.2	0.36533	-0.0674944	0.251882	-0.26796	0.78873	1	FALSE
AC006547.13	0.120692	0.0117622	0.1346	0.0873868	0.930364	1	FALSE
AC006547.15	0.138501	-0.00507747	0.1346	-0.0377227	0.969909	1	FALSE
AC006547.8	2.95011	0.0572932	0.455724	0.125719	0.899954	1	FALSE
AC006548.28	0.831284	-0.157404	0.335586	-0.469042	0.63904	1	FALSE
AC006552.1	1.47329	0.13681	0.366298	0.373495	0.70878	1	FALSE
AC006942.4	8.66358	0.380769	0.456315	0.834444	0.404031	1	FALSE
AC006946.15	4.91007	0.255123	0.441098	0.578381	0.563007	1	FALSE
AC006946.16	0.476902	0.236603	0.252845	0.935762	0.349396	1	FALSE
AC006946.17	0.0614938	-0.000332241	0.134599	-0.00246837	0.998031	1	FALSE
AC006947.1	0.0513836	0.00134403	0.134599	0.00998544	0.992033	1	FALSE
AC006960.5	0.731795	0.0666927	0.357112	0.186756	0.851852	1	FALSE
AC006960.7	0.771634	0.00508221	0.304493	0.0166907	0.986683	1	FALSE
AC006978.6	121.614	0.317336	0.338276	0.938099	0.348193	1	FALSE
AC006994.1	0.102902	-0.0318555	0.134599	-0.236669	0.812914	1	FALSE
AC006994.2	0.931065	-0.643612	0.366478	-1.75621	0.0790531	1	FALSE
AC006994.3	0.505446	-0.138866	0.297476	-0.466815	0.640632	1	FALSE
AC007000.10	0.603495	0.143022	0.293536	0.487237	0.62609	1	FALSE
AC007009.1	0.368141	0.039026	0.226246	0.172494	0.863049	1	FALSE
AC007016.3	0.320876	-0.0026796	0.174894	-0.0153213	0.987776	1	FALSE
AC007036.4	3.27293	-0.0983879	0.452557	-0.217405	0.827893	1	FALSE
AC007038.7	13.9549	0.0690418	0.436125	0.158307	0.874215	1	FALSE
AC007040.11	0.596781	0.478543	0.318761	1.50126	0.133289	1	FALSE
AC007040.6	0.12643	0.0117622	0.1346	0.0873868	0.930364	1	FALSE
AC007040.8	0.419242	-0.0277683	0.29321	-0.0947045	0.92455	1	FALSE
AC007041.2	5.49448	0.14865	0.440737	0.337276	0.735909	1	FALSE
AC007091.1	12.3444	0.042398	0.412968	0.102667	0.918228	1	FALSE
AC007099.2	0.045645	0.00134403	0.134599	0.00998544	0.992033	1	FALSE
AC007128.1	10.4249	-0.0785321	0.45849	-0.171284	0.864	1	FALSE
AC007131.1	0.0938226	-0.0177008	0.1346	-0.131507	0.895374	1	FALSE
AC007131.2	0.15123	0.0117623	0.1346	0.0873869	0.930364	1	FALSE
AC007163.3	0.101595	0	0.1346	0	1	1	FALSE
AC007163.6	1.51029	0.293917	0.421466	0.697368	0.485573	1	FALSE
AC007182.6	0.0419413	0.00130774	0.134599	0.0097158	0.992248	1	FALSE
AC007191.4	106.291	-0.410521	0.397798	-1.03198	0.30208	1	FALSE
AC007192.4	0.188543	0.0210143	0.137416	0.152925	0.878458	1	FALSE
AC007192.6	0.153696	0	0.1346	0	1	1	FALSE
AC007193.10	0.134164	0	0.1346	0	1	1	FALSE
AC007193.6	0.0555106	0	0.134599	0	1	1	FALSE
AC007193.8	2.17145	0.389802	0.438774	0.888388	0.374332	1	FALSE
AC007193.9	0.406691	-0.0232579	0.203125	-0.1145	0.908841	1	FALSE
AC007204.2	3.02761	-0.224881	0.457603	-0.491434	0.62312	1	FALSE
AC007228.11	22.226	0.388835	0.378214	1.02808	0.303911	1	FALSE
AC007228.5	0.251988	-0.0170187	0.170432	-0.0998563	0.920458	1	FALSE
AC007228.9	30.8591	0.329947	0.329241	1.00214	0.316275	1	FALSE
AC007229.3	2.96119	0.531447	0.444337	1.19605	0.231679	1	FALSE
AC007237.2	0.390557	-0.0147385	0.205102	-0.0718594	0.942714	1	FALSE
AC007238.1	32.7925	0.617953	0.452356	1.36608	0.171915	1	FALSE
AC007246.3	103.097	-0.321615	0.252347	-1.2745	0.202488	1	FALSE
AC007249.3	4.14136	0.150296	0.451733	0.33271	0.739353	1	FALSE
AC007255.8	41.2716	-0.432851	0.374662	-1.15531	0.247962	1	FALSE
AC007256.5	6.0773	-0.293892	0.459927	-0.638997	0.522825	1	FALSE
AC007272.3	2.3182	-0.179725	0.430275	-0.417699	0.676167	1	FALSE
AC007277.3	1.03471	0.286131	0.391078	0.731646	0.464385	1	FALSE
AC007279.2	0.209778	-0.00894588	0.1346	-0.0664625	0.94701	1	FALSE
AC007283.4	0.0416447	0.0168837	0.134599	0.125437	0.900178	1	FALSE
AC007285.6	1.10976	0.00698027	0.404889	0.01724	0.986245	1	FALSE
AC007292.3	6.61046	-0.499389	0.460894	-1.08352	0.278577	1	FALSE
AC007292.4	1.20543	-0.375901	0.43183	-0.870483	0.384036	1	FALSE
AC007292.6	33.126	0.10268	0.335238	0.306288	0.759385	1	FALSE
AC007292.7	8.03284	0.0780616	0.440393	0.177254	0.859309	1	FALSE
AC007308.7	0.201958	0	0.1346	0	1	1	FALSE
AC007312.3	0.041072	0	0.134599	0	1	1	FALSE
AC007318.5	19.7569	0.232365	0.429045	0.541588	0.588103	1	FALSE
AC007319.1	0.975708	-0.207235	0.395825	-0.523552	0.60059	1	FALSE
AC007325.1	0.0588837	0	0.134599	0	1	1	FALSE
AC007325.2	19.6527	0.553053	0.453501	1.21952	0.222647	1	FALSE
AC007325.4	6.85685	0.481806	0.438004	1.1	0.27133	1	FALSE
AC007326.1	0.627867	-0.173529	0.311226	-0.557565	0.577141	1	FALSE
AC007349.5	0.139505	0	0.1346	0	1	1	FALSE
AC007349.7	1.00273	0.002959	0.411043	0.00719877	0.994256	1	FALSE
AC007362.3	0.101975	-0.000424565	0.134599	-0.00315428	0.997483	1	FALSE
AC007365.1	0.13843	-0.00557292	0.1346	-0.0414035	0.966974	1	FALSE
AC007365.3	1.9258	-0.385896	0.450659	-0.856292	0.391836	1	FALSE
AC007365.4	0.307074	0.000731711	0.175931	0.00415907	0.996682	1	FALSE
AC007381.3	0.189205	-0.00835724	0.1346	-0.0620893	0.950492	1	FALSE
AC007383.3	156.518	-0.0902629	0.215731	-0.418405	0.675651	1	FALSE
AC007383.4	0.34505	-0.0004348	0.155365	-0.00279856	0.997767	1	FALSE
AC007383.6	0.408564	-0.0390208	0.273323	-0.142765	0.886476	1	FALSE
AC007386.2	0.18743	-0.00669366	0.1346	-0.04973	0.960338	1	FALSE
AC007386.3	2.85025	0.297887	0.444204	0.670609	0.50247	1	FALSE
AC007386.4	0.0409657	0.0168837	0.134599	0.125437	0.900178	1	FALSE
AC007389.1	0.075801	0	0.134599	0	1	1	FALSE
AC007389.2	0.122624	0.0117161	0.1346	0.0870438	0.930637	1	FALSE
AC007391.2	0.629401	-0.221768	0.300907	-0.736996	0.461125	1	FALSE
AC007392.3	18.5738	0.00128548	0.353871	0.00363261	0.997102	1	FALSE
AC007392.4	7.02709	-0.232544	0.457531	-0.508259	0.611272	1	FALSE
AC007394.3	0.51554	0.0360226	0.275092	0.130947	0.895817	1	FALSE
AC007395.4	0.252195	0.0058249	0.14674	0.0396954	0.968336	1	FALSE
AC007403.2	8.52707	-0.286291	0.433016	-0.661155	0.508513	1	FALSE
AC007403.3	10.1101	-0.184179	0.438514	-0.420008	0.67448	1	FALSE
AC007405.4	4.70328	-0.27235	0.448825	-0.606805	0.54398	1	FALSE
AC007405.6	69.9459	0.220598	0.294829	0.748224	0.454325	1	FALSE
AC007405.8	1.73327	0.347888	0.418574	0.831125	0.405903	1	FALSE
AC007461.2	4.34216	-0.114566	0.450311	-0.254416	0.799174	1	FALSE
AC007551.2	0.450994	-0.0254996	0.276726	-0.0921477	0.926581	1	FALSE
AC007557.1	0.471221	-0.0817964	0.256191	-0.319279	0.749515	1	FALSE
AC007557.3	0.476651	0.247636	0.298625	0.829256	0.40696	1	FALSE
AC007557.5	0.104507	0.013531	0.1346	0.100528	0.919925	1	FALSE
AC007559.1	0.0962191	0	0.134599	0	1	1	FALSE
AC007560.1	0.508564	-0.00561689	0.31559	-0.0177981	0.9858	1	FALSE
AC007562.1	0.44206	0.0364538	0.251599	0.144888	0.884799	1	FALSE
AC007563.3	6.01916	-0.057925	0.429233	-0.13495	0.892651	1	FALSE
AC007563.4	0.144556	0	0.1346	0	1	1	FALSE
AC007563.5	3.44285	1.08308	0.435256	2.48838	0.0128326	1	FALSE
AC007566.10	17.4848	-0.312962	0.431273	-0.725671	0.468041	1	FALSE
AC007618.3	0.417609	0.0549036	0.182867	0.300238	0.763995	1	FALSE
AC007620.3	4.19793	-0.331905	0.459023	-0.72307	0.469637	1	FALSE
AC007679.1	0.154161	-0.0353468	0.1346	-0.262607	0.792854	1	FALSE
AC007682.1	1.15257	0.181683	0.345434	0.525957	0.598918	1	FALSE
AC007731.1	0.969414	-0.367276	0.379654	-0.967399	0.333345	1	FALSE
AC007740.1	0.068089	0	0.134599	0	1	1	FALSE
AC007743.1	30.9122	-0.286889	0.426994	-0.671879	0.501661	1	FALSE
AC007750.5	0.270946	-0.0202333	0.171995	-0.117638	0.906354	1	FALSE
AC007773.2	12.2306	0.0206584	0.439394	0.0470157	0.962501	1	FALSE
AC007787.3	0.154965	-0.00382358	0.1346	-0.028407	0.977338	1	FALSE
AC007790.4	1.13861	0.103388	0.384077	0.269184	0.787788	1	FALSE
AC007796.1	1.83355	-0.412946	0.451039	-0.915545	0.359905	1	FALSE
AC007879.1	0.113145	-0.00375781	0.1346	-0.0279184	0.977727	1	FALSE
AC007879.2	3.49065	0.141156	0.454536	0.310549	0.756144	1	FALSE
AC007879.3	1.14795	-0.154443	0.419705	-0.367979	0.712889	1	FALSE
AC007879.4	0.244801	0.00426652	0.145781	0.0292667	0.976652	1	FALSE
AC007879.5	3.90522	0.251883	0.456113	0.552239	0.580785	1	FALSE
AC007879.7	0.180742	0	0.1346	0	1	1	FALSE
AC007880.1	0.989379	-0.0751739	0.398893	-0.188456	0.850519	1	FALSE
AC007899.3	0.0918287	-0.00176324	0.1346	-0.0130999	0.989548	1	FALSE
AC007906.1	0.457625	0.14777	0.276329	0.534761	0.592815	1	FALSE
AC007919.18	0.119567	0	0.1346	0	1	1	FALSE
AC007950.1	0.115757	-0.00573285	0.1346	-0.0425917	0.966027	1	FALSE
AC007950.2	6.08482	0.0349055	0.440746	0.0791963	0.936876	1	FALSE
AC007952.5	1.36172	0.0180928	0.417699	0.0433154	0.96545	1	FALSE
AC007966.1	0.71954	-0.212453	0.288502	-0.736401	0.461487	1	FALSE
AC007969.4	0.579398	0.253945	0.33096	0.767299	0.442904	1	FALSE
AC008060.7	0.110818	-0.00341978	0.1346	-0.025407	0.97973	1	FALSE
AC008063.2	0.342267	-0.0689178	0.249644	-0.276065	0.782498	1	FALSE
AC008065.1	1.3024	0.156394	0.373935	0.418239	0.675772	1	FALSE
AC008069.2	0.0510012	0.0168837	0.134599	0.125437	0.900178	1	FALSE
AC008073.9	0.0926357	0.0134849	0.1346	0.100185	0.920197	1	FALSE
AC008074.1	0.531022	0.12812	0.319455	0.401058	0.688378	1	FALSE
AC008074.3	4.01673	-0.229343	0.446022	-0.514198	0.607114	1	FALSE
AC008074.4	0.803342	-0.0114797	0.346061	-0.0331725	0.973537	1	FALSE
AC008079.10	1.79004	-0.0436454	0.439278	-0.0993573	0.920855	1	FALSE
AC008088.4	1.18507	-0.482529	0.406902	-1.18586	0.235678	1	FALSE
AC008132.13	1.28933	-0.238651	0.395098	-0.604031	0.545823	1	FALSE
AC008154.4	0.753665	-0.176495	0.360522	-0.489553	0.62445	1	FALSE
AC008155.1	2.42284	0.540232	0.433157	1.2472	0.212326	1	FALSE
AC008264.4	0.40772	-0.00725828	0.206167	-0.0352059	0.971916	1	FALSE
AC008269.2	0.619066	0.111142	0.361178	0.307721	0.758295	1	FALSE
AC008277.1	0.704636	-0.110307	0.298983	-0.368942	0.712171	1	FALSE
AC008278.2	0.712656	-0.0185913	0.309562	-0.0600568	0.95211	1	FALSE
AC008280.1	0.174552	-0.00730555	0.1346	-0.0542759	0.956715	1	FALSE
AC008427.2	0.883222	-0.15262	0.335791	-0.45451	0.649462	1	FALSE
AC008440.10	1.70314	-0.153684	0.421767	-0.36438	0.715574	1	FALSE
AC008440.5	0.881699	0.305487	0.374874	0.814905	0.415127	1	FALSE
AC008522.1	3.83467	0.102866	0.451383	0.227891	0.819731	1	FALSE
AC008592.3	1.37064	-0.693907	0.433491	-1.60074	0.109434	1	FALSE
AC008592.4	0.0401284	0.00129787	0.134599	0.0096425	0.992307	1	FALSE
AC008592.5	0.088572	0	0.134599	0	1	1	FALSE
AC008592.8	0.177686	-0.0382371	0.1346	-0.284079	0.77635	1	FALSE
AC008641.1	0.336598	-0.0410506	0.200098	-0.205152	0.837453	1	FALSE
AC008686.1	0.318394	-0.0914232	0.225601	-0.405243	0.685299	1	FALSE
AC008691.1	0.0695655	0	0.134599	0	1	1	FALSE
AC008694.2	0.301501	-0.0309591	0.198902	-0.15565	0.876309	1	FALSE
AC008697.1	2.9229	0.0879781	0.451971	0.194654	0.845664	1	FALSE
AC008746.12	15.8466	-0.148558	0.435579	-0.34106	0.733059	1	FALSE
AC008746.3	4.46331	0.509898	0.452744	1.12624	0.260064	1	FALSE
AC008753.3	1.40899	0.359168	0.41266	0.870371	0.384098	1	FALSE
AC008753.6	2.87182	0.0534118	0.454322	0.117564	0.906413	1	FALSE
AC008759.1	1.29256	0.0861303	0.391902	0.219775	0.826046	1	FALSE
AC008781.7	0.761794	0.281893	0.34911	0.807461	0.419401	1	FALSE
AC008850.3	2.91751	0.070085	0.438993	0.15965	0.873157	1	FALSE
AC008937.2	0.279364	0.00491696	0.134601	0.03653	0.97086	1	FALSE
AC008982.2	26.6869	-0.378876	0.42666	-0.888004	0.374538	1	FALSE
AC008985.1	0.0884492	0	0.134599	0	1	1	FALSE
AC008992.1	0.457812	-0.115216	0.29437	-0.391399	0.695502	1	FALSE
AC009005.2	125.001	0.391176	0.368972	1.06018	0.289064	1	FALSE
AC009014.3	195.287	0.592338	0.379548	1.56064	0.118609	1	FALSE
AC009060.1	0.27823	-0.0151517	0.149249	-0.10152	0.919138	1	FALSE
AC009065.1	3.54154	0.540717	0.433628	1.24696	0.212413	1	FALSE
AC009095.4	0.0560561	0	0.134599	0	1	1	FALSE
AC009110.1	3.28893	0.0762764	0.426509	0.178839	0.858064	1	FALSE
AC009120.11	4.61986	-0.0877793	0.453347	-0.193625	0.84647	1	FALSE
AC009120.3	44.5183	0.314404	0.447603	0.702416	0.48242	1	FALSE
AC009120.4	1.76784	0.0969949	0.43397	0.223506	0.823142	1	FALSE
AC009120.5	0.360018	-0.018412	0.268592	-0.06855	0.945348	1	FALSE
AC009120.6	190.059	0.52455	0.306847	1.70948	0.0873615	1	FALSE
AC009120.8	0.684981	-0.170579	0.363807	-0.468871	0.639162	1	FALSE
AC009121.1	0.123669	0	0.1346	0	1	1	FALSE
AC009133.12	25.5842	-0.0455015	0.413508	-0.110038	0.912379	1	FALSE
AC009133.15	8.25099	0.53386	0.457265	1.16751	0.243006	1	FALSE
AC009133.17	37.7517	0.906195	0.402594	2.25089	0.0243925	1	FALSE
AC009133.21	2.37917	-0.168029	0.453565	-0.370462	0.711038	1	FALSE
AC009158.1	0.0776788	-0.000414719	0.134599	-0.00308114	0.997542	1	FALSE
AC009166.5	2.39536	-0.0258122	0.441592	-0.0584526	0.953388	1	FALSE
AC009166.7	2.4007	0.135202	0.450857	0.299878	0.76427	1	FALSE
AC009228.1	1.55903	-0.627105	0.447385	-1.40171	0.161001	1	FALSE
AC009238.6	0.135835	0.0117161	0.1346	0.0870439	0.930637	1	FALSE
AC009245.3	5.58093	-0.150765	0.449098	-0.335706	0.737093	1	FALSE
AC009262.2	0.347038	-0.0418364	0.200188	-0.208986	0.834459	1	FALSE
AC009263.2	0.0738398	0	0.134599	0	1	1	FALSE
AC009264.1	1.66782	0.288191	0.382466	0.753509	0.451144	1	FALSE
AC009274.6	1.21303	0.00302489	0.41725	0.00724957	0.994216	1	FALSE
AC009299.2	0.947356	0.247858	0.354915	0.698359	0.484953	1	FALSE
AC009299.3	89.4297	-0.00943388	0.273031	-0.0345524	0.972437	1	FALSE
AC009299.5	1.56528	0.160467	0.427172	0.37565	0.707177	1	FALSE
AC009302.2	1.28496	-0.0434235	0.383333	-0.113279	0.90981	1	FALSE
AC009303.1	0.191178	-0.00722297	0.1346	-0.0536624	0.957204	1	FALSE
AC009303.2	30.586	0.250735	0.337807	0.742243	0.45794	1	FALSE
AC009303.3	1.14555	0.0330961	0.426377	0.0776216	0.938129	1	FALSE
AC009312.1	3.60252	-0.287702	0.457443	-0.628936	0.529391	1	FALSE
AC009336.19	0.104524	-0.0180383	0.1346	-0.134015	0.893391	1	FALSE
AC009362.2	1.48274	-0.584816	0.405279	-1.443	0.149022	1	FALSE
AC009403.2	46.217	-0.514318	0.291245	-1.76593	0.0774072	1	FALSE
AC009404.2	66.3818	-0.599929	0.300475	-1.9966	0.0458687	1	FALSE
AC009410.1	0.161926	0	0.1346	0	1	1	FALSE
AC009413.2	1.07471	-0.388257	0.394881	-0.983225	0.325497	1	FALSE
AC009414.1	0.191062	0	0.1346	0	1	1	FALSE
AC009473.1	5.61418	0.515234	0.428283	1.20302	0.228968	1	FALSE
AC009474.1	0.412908	0.0252237	0.210019	0.120102	0.904403	1	FALSE
AC009474.2	0.0908209	-0.000424568	0.134599	-0.00315431	0.997483	1	FALSE
AC009480.4	0.118438	0.0109162	0.1346	0.0811013	0.935361	1	FALSE
AC009487.6	7.30404	-0.200244	0.445714	-0.449265	0.653241	1	FALSE
AC009495.2	1.54931	-0.35424	0.442291	-0.800921	0.423177	1	FALSE
AC009495.3	2.69852	-0.298657	0.449491	-0.664434	0.506412	1	FALSE
AC009495.4	2.10846	0.0806681	0.434725	0.185561	0.852789	1	FALSE
AC009501.4	26.3923	-0.759903	0.452586	-1.67902	0.0931475	1	FALSE
AC009502.1	0.0563957	0	0.134599	0	1	1	FALSE
AC009505.2	5.27178	-0.0973303	0.455703	-0.213583	0.830872	1	FALSE
AC009506.1	92.4876	0.218397	0.218545	0.999322	0.317639	1	FALSE
AC009517.2	0.415752	-0.157885	0.270719	-0.583208	0.559753	1	FALSE
AC009518.4	0.0629999	-0.000414719	0.134599	-0.00308114	0.997542	1	FALSE
AC009542.2	0.0384769	0	0.134599	0	1	1	FALSE
AC009784.3	0.216356	-0.0246888	0.1346	-0.183423	0.854466	1	FALSE
AC009784.4	0.751855	-0.00764871	0.302818	-0.0252585	0.979849	1	FALSE
AC009878.2	1.23807	0.109579	0.422331	0.259463	0.795278	1	FALSE
AC009945.4	0.0884942	0	0.134599	0	1	1	FALSE
AC009948.5	336.152	-0.412486	0.288052	-1.43199	0.152148	1	FALSE
AC009948.7	8.53976	-0.0901345	0.40685	-0.221542	0.82467	1	FALSE
AC009950.2	0.902715	-0.0654628	0.39701	-0.16489	0.869031	1	FALSE
AC009955.8	1.5251	-0.287251	0.44122	-0.651039	0.515022	1	FALSE
AC009961.2	2.4857	0.221092	0.434977	0.508283	0.611255	1	FALSE
AC009961.3	13.5871	-0.0331414	0.413817	-0.0800871	0.936168	1	FALSE
AC009961.5	0.209915	-0.00903823	0.1346	-0.0671486	0.946463	1	FALSE
AC009963.5	0.471128	-0.107513	0.291267	-0.369121	0.712037	1	FALSE
AC009963.6	0.366288	-0.0680774	0.160492	-0.42418	0.671435	1	FALSE
AC009965.2	0.509884	-0.220779	0.345819	-0.638424	0.523198	1	FALSE
AC009967.3	1.05813	0.279757	0.413428	0.676678	0.49861	1	FALSE
AC010084.1	0.223371	-0.00902848	0.1346	-0.0670761	0.946521	1	FALSE
AC010091.1	0.705388	-0.138676	0.27804	-0.498762	0.617947	1	FALSE
AC010095.6	0.0482448	0	0.134599	0	1	1	FALSE
AC010096.1	0.241258	-0.0486898	0.14549	-0.334662	0.73788	1	FALSE
AC010127.3	0.516246	-0.208325	0.280869	-0.741716	0.45826	1	FALSE
AC010132.11	0.298486	0.0239993	0.150955	0.158983	0.873682	1	FALSE
AC010136.2	1.30434	-0.220796	0.378934	-0.582678	0.56011	1	FALSE
AC010148.1	1.67156	0.186063	0.422313	0.44058	0.659517	1	FALSE
AC010149.4	0.0593374	0	0.134599	0	1	1	FALSE
AC010150.1	2.37686	-0.0825227	0.396988	-0.207872	0.835329	1	FALSE
AC010226.4	1.36442	0.0191964	0.438888	0.0437388	0.965113	1	FALSE
AC010240.2	13.9052	0.109951	0.384507	0.285953	0.774914	1	FALSE
AC010240.3	0.353198	-0.0518698	0.224778	-0.230761	0.817501	1	FALSE
AC010468.1	3.28459	0.0480337	0.454942	0.105582	0.915914	1	FALSE
AC010492.2	9.93378	-0.145015	0.402323	-0.360443	0.718516	1	FALSE
AC010492.5	0.0643048	-0.000368557	0.134599	-0.00273818	0.997815	1	FALSE
AC010504.2	3.47221	-0.532827	0.459662	-1.15917	0.246387	1	FALSE
AC010524.2	0.0652294	-0.000332241	0.134599	-0.00246837	0.998031	1	FALSE
AC010547.9	2.58001	-0.280068	0.447785	-0.625451	0.531675	1	FALSE
AC010642.1	23.124	-0.000635964	0.456536	-0.00139302	0.998889	1	FALSE
AC010642.2	0.0421779	0	0.134599	0	1	1	FALSE
AC010677.5	1.53327	-0.0290927	0.409786	-0.0709948	0.943402	1	FALSE
AC010729.1	12.4395	-0.111038	0.426456	-0.260374	0.794576	1	FALSE
AC010729.2	15.1007	0.305646	0.385494	0.792868	0.427855	1	FALSE
AC010731.4	0.167368	0	0.1346	0	1	1	FALSE
AC010733.5	1.96548	0.0592734	0.446952	0.132617	0.894496	1	FALSE
AC010745.4	0.161159	-0.00550015	0.1346	-0.040863	0.967405	1	FALSE
AC010746.3	0.160153	0.0100857	0.1346	0.0749308	0.94027	1	FALSE
AC010761.10	1.30733	0.218738	0.352451	0.620621	0.534849	1	FALSE
AC010761.13	0.0530189	0.0154261	0.134599	0.114607	0.908756	1	FALSE
AC010761.14	0.6034	0.0807381	0.327703	0.246376	0.805391	1	FALSE
AC010761.6	4.82759	-0.658835	0.457517	-1.44002	0.14986	1	FALSE
AC010761.8	8.44848	0.354033	0.450008	0.786725	0.431443	1	FALSE
AC010761.9	1.17004	0.548108	0.336122	1.63068	0.102958	1	FALSE
AC010878.3	2.3288	-0.183972	0.455245	-0.404116	0.686128	1	FALSE
AC010880.1	0.0470712	0.00134403	0.134599	0.00998544	0.992033	1	FALSE
AC010883.5	6.29561	0.170937	0.440651	0.38792	0.698075	1	FALSE
AC010884.1	6.18842	-0.0561272	0.448009	-0.125282	0.900301	1	FALSE
AC010890.1	2.81166	-0.447945	0.459416	-0.975031	0.329545	1	FALSE
AC010894.3	16.7269	0.146273	0.411051	0.35585	0.721953	1	FALSE
AC010894.4	0.0579682	0	0.134599	0	1	1	FALSE
AC010900.2	1.67267	0.411957	0.420192	0.980403	0.326887	1	FALSE
AC010904.1	0.153028	0.00880178	0.1346	0.065392	0.947862	1	FALSE
AC010967.2	0.197467	0.00699986	0.139007	0.0503561	0.959839	1	FALSE
AC010969.1	0.256145	-0.00934363	0.1346	-0.0694176	0.944657	1	FALSE
AC010974.3	0.187115	0.0239585	0.1346	0.177997	0.858725	1	FALSE
AC010976.2	0.542466	-0.0340349	0.281678	-0.120829	0.903827	1	FALSE
AC010980.2	19.9254	0.554612	0.366489	1.51331	0.130201	1	FALSE
AC010983.1	0.120298	0	0.1346	0	1	1	FALSE
AC010987.5	0.127366	0.0118084	0.1346	0.0877298	0.930091	1	FALSE
AC010987.6	0.415909	-0.104359	0.274863	-0.379675	0.704187	1	FALSE
AC011043.1	162.11	-0.161443	0.270921	-0.595905	0.551238	1	FALSE
AC011155.1	0.132944	0.0290246	0.1346	0.215636	0.829271	1	FALSE
AC011196.3	0.102451	-0.00240635	0.1346	-0.0178779	0.985736	1	FALSE
AC011239.1	0.0506214	0	0.134599	0	1	1	FALSE
AC011247.3	0.146851	-0.00550015	0.1346	-0.040863	0.967405	1	FALSE
AC011286.1	0.176658	-0.00761095	0.1346	-0.0565448	0.954908	1	FALSE
AC011290.4	0.375428	-0.100828	0.289415	-0.348387	0.727549	1	FALSE
AC011290.5	0.936335	0.226726	0.352001	0.644106	0.519507	1	FALSE
AC011294.3	0.780285	0.317419	0.386535	0.821192	0.411537	1	FALSE
AC011298.2	4.13586	-0.0745624	0.457218	-0.163078	0.870457	1	FALSE
AC011306.1	0.0291576	0	0.134599	0	1	1	FALSE
AC011330.13	3.21686	-0.0667496	0.456601	-0.146188	0.883773	1	FALSE
AC011330.5	0.714513	-0.18809	0.352251	-0.533966	0.593365	1	FALSE
AC011366.3	0.0902343	-0.000332241	0.134599	-0.00246837	0.998031	1	FALSE
AC011380.8	0.849255	0.318105	0.357527	0.889736	0.373608	1	FALSE
AC011523.2	0.0303554	0	0.134599	0	1	1	FALSE
AC011524.1	0.44866	-0.039754	0.289711	-0.137219	0.890857	1	FALSE
AC011551.3	0.968617	-0.204085	0.365537	-0.558314	0.57663	1	FALSE
AC011558.5	0.97467	0.55596	0.38215	1.45482	0.145719	1	FALSE
AC011718.2	0.303655	-0.0453978	0.134601	-0.337277	0.735908	1	FALSE
AC011738.4	0.689925	-0.107941	0.288175	-0.374566	0.707983	1	FALSE
AC011742.5	0.34314	0.0355575	0.201376	0.176573	0.859844	1	FALSE
AC011747.3	0.609977	0.358363	0.330212	1.08525	0.277811	1	FALSE
AC011747.4	10.1034	-0.160905	0.442044	-0.364003	0.715856	1	FALSE
AC011747.6	0.72653	0.270225	0.346542	0.779777	0.435522	1	FALSE
AC011753.5	0.271165	-0.0211944	0.172109	-0.123145	0.901992	1	FALSE
AC011753.6	0.118476	0	0.1346	0	1	1	FALSE
AC011816.1	0.588047	-0.0964146	0.354087	-0.272291	0.785398	1	FALSE
AC011841.1	0.742547	0.349784	0.313612	1.11534	0.264705	1	FALSE
AC011893.3	0.0426203	0.00130774	0.134599	0.0097158	0.992248	1	FALSE
AC011899.10	0.0721216	0.0151613	0.134599	0.11264	0.910316	1	FALSE
AC011899.9	0.0297488	0	0.134599	0	1	1	FALSE
AC011933.2	0.193618	-0.00559249	0.1346	-0.0415489	0.966858	1	FALSE
AC011997.1	0.0431866	0.00129787	0.134599	0.0096425	0.992307	1	FALSE
AC011998.4	0.0986395	0.0290707	0.1346	0.215979	0.829004	1	FALSE
AC011999.1	0.758607	0.100614	0.371646	0.270725	0.786602	1	FALSE
AC012065.5	1.14877	-0.255808	0.42911	-0.596136	0.551084	1	FALSE
AC012066.1	3.57068	-0.208946	0.451382	-0.462901	0.643435	1	FALSE
AC012074.2	21.4867	0.303934	0.402901	0.754365	0.45063	1	FALSE
AC012123.1	13.9065	-0.315255	0.424173	-0.743222	0.457347	1	FALSE
AC012146.7	42.0215	0.617567	0.338562	1.82408	0.0681393	1	FALSE
AC012314.8	42.8834	-0.604951	0.337989	-1.78985	0.0734774	1	FALSE
AC012354.6	0.173129	0	0.1346	0	1	1	FALSE
AC012354.8	7.26146	0.317802	0.456668	0.695915	0.486482	1	FALSE
AC012358.4	5.79801	0.657765	0.445231	1.47736	0.13958	1	FALSE
AC012358.7	9.12414	-0.425597	0.460381	-0.924447	0.355254	1	FALSE
AC012358.8	2.60851	-0.346519	0.45699	-0.758264	0.448293	1	FALSE
AC012360.4	2.10446	0.158242	0.446345	0.354529	0.722943	1	FALSE
AC012360.6	1.0138	0.297474	0.381859	0.779014	0.435971	1	FALSE
AC012363.4	1.00964	0.551882	0.39248	1.40614	0.159682	1	FALSE
AC012368.1	2.7695	-0.175773	0.456386	-0.385142	0.700132	1	FALSE
AC012370.2	0.135437	0.0273481	0.1346	0.203181	0.838994	1	FALSE
AC012442.5	2.2724	0.213184	0.443651	0.480521	0.630857	1	FALSE
AC012442.6	4.90649	0.799155	0.439574	1.81802	0.0690609	1	FALSE
AC012456.4	0.208525	0.00741406	0.140982	0.0525888	0.95806	1	FALSE
AC012462.1	0.913931	-0.0969574	0.385543	-0.251483	0.801441	1	FALSE
AC012462.2	0.0780414	0	0.134599	0	1	1	FALSE
AC012485.2	0.0635054	0	0.1346	0	1	1	FALSE
AC012493.1	0.241655	-0.0106591	0.134601	-0.0791909	0.936881	1	FALSE
AC012499.1	6.37016	-0.472809	0.448628	-1.0539	0.291929	1	FALSE
AC012501.3	1.27239	0.29664	0.394265	0.752386	0.451819	1	FALSE
AC012506.1	0.0590894	0	0.134599	0	1	1	FALSE
AC012506.2	0.0815393	0	0.134599	0	1	1	FALSE
AC012506.3	0.176058	0	0.1346	0	1	1	FALSE
AC012506.4	0.282454	-0.0563604	0.1346	-0.418724	0.675418	1	FALSE
AC012507.3	0.824165	-0.341192	0.341042	-1.00044	0.317099	1	FALSE
AC012512.1	0.0614169	0	0.134599	0	1	1	FALSE
AC012531.25	0.118752	-0.0336242	0.1346	-0.249809	0.802735	1	FALSE
AC012668.2	0.201808	-0.00924152	0.1346	-0.068659	0.945261	1	FALSE
AC012668.3	0.0361485	0	0.134599	0	1	1	FALSE
AC012671.2	0.203403	0.00655737	0.1346	0.0487173	0.961145	1	FALSE
AC013264.2	0.344144	0.0334375	0.199972	0.16721	0.867204	1	FALSE
AC013267.1	0.785133	0.121587	0.3296	0.368893	0.712207	1	FALSE
AC013268.3	0.856898	0.142477	0.337112	0.42264	0.672558	1	FALSE
AC013275.2	40.8978	0.482114	0.384432	1.2541	0.209807	1	FALSE
AC013402.5	0.0593251	0	0.134599	0	1	1	FALSE
AC013403.13	0.0755414	0.0151613	0.134599	0.11264	0.910316	1	FALSE
AC013404.1	0.314169	-0.0383384	0.197995	-0.193633	0.846463	1	FALSE
AC013410.1	0.0598386	-0.0301792	0.134599	-0.224215	0.82259	1	FALSE
AC013429.5	0.0728943	0	0.134599	0	1	1	FALSE
AC013436.6	0.0850965	0	0.134599	0	1	1	FALSE
AC013448.2	0.0510012	0.0168837	0.134599	0.125437	0.900178	1	FALSE
AC013460.1	15.5204	-0.479329	0.390436	-1.22767	0.219569	1	FALSE
AC013461.1	762.172	-0.495564	0.212101	-2.33646	0.0194675	1	FALSE
AC013463.2	32.4943	0.500746	0.410021	1.22127	0.221984	1	FALSE
AC013470.6	2.54445	-0.112455	0.451106	-0.249287	0.803139	1	FALSE
AC013470.8	0.0409657	0.0168837	0.134599	0.125437	0.900178	1	FALSE
AC013472.3	1.32831	0.370594	0.431863	0.858128	0.390822	1	FALSE
AC013472.4	0.0894063	0	0.134599	0	1	1	FALSE
AC013474.4	1.33732	0.0508762	0.421784	0.120621	0.903991	1	FALSE
AC013480.2	0.389219	-0.0443816	0.203849	-0.217719	0.827648	1	FALSE
AC013727.1	0.106188	0.0290246	0.1346	0.215636	0.829271	1	FALSE
AC013733.3	1.09551	-0.526626	0.405392	-1.29905	0.193925	1	FALSE
AC015691.13	0.129272	0	0.1346	0	1	1	FALSE
AC015849.12	0.108136	0.0117161	0.1346	0.0870439	0.930637	1	FALSE
AC015849.13	3.43356	-0.0890114	0.433094	-0.205524	0.837162	1	FALSE
AC015849.14	0.245405	0.0373356	0.191704	0.194756	0.845584	1	FALSE
AC015849.16	86.079	-0.300935	0.417536	-0.720741	0.471069	1	FALSE
AC015849.2	2.56563	0.117073	0.447459	0.26164	0.793599	1	FALSE
AC015922.7	0.369568	0.046466	0.176499	0.263265	0.792346	1	FALSE
AC015933.2	2.27364	-0.333367	0.450514	-0.73997	0.459318	1	FALSE
AC015936.3	0.105214	0.0121646	0.1346	0.0903762	0.927988	1	FALSE
AC015969.3	0.074297	0	0.134599	0	1	1	FALSE
AC015971.2	1.79862	-0.179317	0.434019	-0.413156	0.679492	1	FALSE
AC015977.5	0.407153	0.137722	0.316276	0.435451	0.663235	1	FALSE
AC015977.6	1.45371	-0.0723114	0.425654	-0.169883	0.865102	1	FALSE
AC015987.1	2.46647	0.342601	0.446213	0.767797	0.442608	1	FALSE
AC016292.1	0.170014	-0.00697891	0.1346	-0.0518492	0.958649	1	FALSE
AC016292.3	0.314815	-0.0455244	0.22062	-0.206348	0.836519	1	FALSE
AC016549.1	1.9462	0.371519	0.378181	0.982384	0.325911	1	FALSE
AC016577.1	0.100216	0	0.1346	0	1	1	FALSE
AC016582.2	1.36167	-0.0167317	0.436335	-0.038346	0.969412	1	FALSE
AC016629.3	0.112947	0	0.1346	0	1	1	FALSE
AC016691.2	0.128606	0	0.1346	0	1	1	FALSE
AC016696.1	0.048937	0	0.134599	0	1	1	FALSE
AC016700.2	0.355524	-0.0240723	0.15628	-0.154033	0.877584	1	FALSE
AC016700.4	0.0990121	0	0.1346	0	1	1	FALSE
AC016700.5	21.4887	0.408375	0.443091	0.921652	0.35671	1	FALSE
AC016700.6	1.4299	-0.88452	0.436367	-2.02701	0.0426616	1	FALSE
AC016712.2	10.519	0.62213	0.451337	1.37842	0.168075	1	FALSE
AC016716.1	1.07708	0.145287	0.416808	0.348571	0.727412	1	FALSE
AC016716.2	0.200442	0.00577942	0.134601	0.0429376	0.965751	1	FALSE
AC016717.1	0.1843	-0.00716702	0.1346	-0.0532467	0.957535	1	FALSE
AC016722.3	0.666	-0.183517	0.36532	-0.502347	0.615424	1	FALSE
AC016722.4	0.396712	0.0226485	0.225114	0.100609	0.919861	1	FALSE
AC016723.4	0.453883	0.0557557	0.203649	0.273783	0.784252	1	FALSE
AC016724.6	0.057818	0	0.134599	0	1	1	FALSE
AC016734.1	0.0552856	0	0.134599	0	1	1	FALSE
AC016734.2	2.15999	-0.468566	0.457254	-1.02474	0.305486	1	FALSE
AC016735.1	4.46742	0.405685	0.440164	0.921667	0.356702	1	FALSE
AC016735.2	1.31632	0.0621382	0.421819	0.14731	0.882887	1	FALSE
AC016735.3	0.0787295	-0.000424568	0.134599	-0.00315431	0.997483	1	FALSE
AC016738.4	0.410013	0.0479389	0.27075	0.177059	0.859462	1	FALSE
AC016739.2	21.0368	0.157029	0.418508	0.375211	0.707503	1	FALSE
AC016745.3	0.337832	-0.0397094	0.20207	-0.196513	0.844209	1	FALSE
AC016747.3	285.933	0.431903	0.199782	2.16186	0.0306287	1	FALSE
AC016751.3	0.0682787	-0.00015817	0.134599	-0.00117512	0.999062	1	FALSE
AC016757.3	27.1665	0.0586645	0.354051	0.165695	0.868397	1	FALSE
AC016768.1	0.226441	-0.0116835	0.134601	-0.0868015	0.930829	1	FALSE
AC016772.4	1.67776	0.296883	0.401125	0.740126	0.459224	1	FALSE
AC016831.7	2.45655	0.682044	0.44279	1.54033	0.123479	1	FALSE
AC016894.1	1.10939	0.061558	0.26644	0.231039	0.817285	1	FALSE
AC016907.3	1.81349	0.181096	0.444424	0.407485	0.683652	1	FALSE
AC016910.1	0.105563	0	0.1346	0	1	1	FALSE
AC016912.3	0.257137	-0.0253829	0.1346	-0.18858	0.850422	1	FALSE
AC016995.3	1.00882	0.333708	0.40599	0.82196	0.4111	1	FALSE
AC016999.2	0.304288	0.00556867	0.176997	0.0314618	0.974901	1	FALSE
AC017002.2	0.291732	0.0292484	0.174695	0.167425	0.867035	1	FALSE
AC017006.3	0.0412725	0	0.134599	0	1	1	FALSE
AC017028.1	0.119794	-0.0179922	0.1346	-0.133672	0.893662	1	FALSE
AC017035.2	0.42263	0.0111775	0.25432	0.0439506	0.964944	1	FALSE
AC017060.1	100.423	0.202627	0.403087	0.502688	0.615184	1	FALSE
AC017074.2	4.89703	-0.168026	0.45703	-0.367649	0.713135	1	FALSE
AC017078.1	0.0945308	-0.00346416	0.1346	-0.0257367	0.979467	1	FALSE
AC017079.3	0.401588	-0.011366	0.20569	-0.0552578	0.955933	1	FALSE
AC017079.4	0.660465	0.238759	0.314409	0.75939	0.447619	1	FALSE
AC017083.2	0.304624	-0.0827652	0.176544	-0.468807	0.639207	1	FALSE
AC017101.10	0.0784121	-0.0145934	0.134599	-0.108421	0.913662	1	FALSE
AC017104.4	0.0418711	0	0.134599	0	1	1	FALSE
AC017104.6	25.1111	0.53574	0.388138	1.38028	0.1675	1	FALSE
AC018359.1	8.09317	-0.305627	0.39987	-0.764317	0.444678	1	FALSE
AC018442.1	1.54929	-0.00652223	0.29589	-0.0220428	0.982414	1	FALSE
AC018462.2	0.527499	0.480661	0.339291	1.41666	0.156581	1	FALSE
AC018463.4	0.252918	-0.0127165	0.146436	-0.0868399	0.930799	1	FALSE
AC018463.5	0.58267	-0.07234	0.303972	-0.237982	0.811895	1	FALSE
AC018512.1	0.0784292	0	0.134599	0	1	1	FALSE
AC018634.9	0.184057	0.00840903	0.1346	0.0624742	0.950185	1	FALSE
AC018641.7	10.8053	-0.118706	0.408844	-0.290344	0.771553	1	FALSE
AC018647.3	4.56787	0.884349	0.449069	1.96929	0.0489196	1	FALSE
AC018712.2	0.468104	-0.102916	0.273774	-0.375917	0.706979	1	FALSE
AC018737.3	0.288663	0.0669454	0.197992	0.338122	0.735271	1	FALSE
AC018738.2	0.0834209	0	0.134599	0	1	1	FALSE
AC018755.16	32.9549	0.479838	0.454658	1.05538	0.291251	1	FALSE
AC018755.17	1.93741	-0.155554	0.451756	-0.344331	0.730597	1	FALSE
AC018766.6	2.91397	0.605419	0.427044	1.4177	0.156279	1	FALSE
AC018799.1	0.13961	0	0.1346	0	1	1	FALSE
AC018804.6	0.133731	-0.00377742	0.1346	-0.0280641	0.977611	1	FALSE
AC018816.3	0.891754	-0.0504642	0.398929	-0.126499	0.899337	1	FALSE
AC018832.1	0.296019	-0.0122996	0.134601	-0.0913784	0.927192	1	FALSE
AC018865.5	0.562823	-0.18469	0.328473	-0.562268	0.573934	1	FALSE
AC018890.6	0.659156	0.194751	0.309339	0.62957	0.528976	1	FALSE
AC019050.1	0.890914	0.0248286	0.371473	0.0668384	0.94671	1	FALSE
AC019084.7	0.073495	0	0.134599	0	1	1	FALSE
AC019097.7	3.60289	-0.351877	0.456818	-0.770279	0.441134	1	FALSE
AC019109.1	0.0398511	0	0.134599	0	1	1	FALSE
AC019118.3	0.81802	-0.596248	0.374525	-1.59201	0.111382	1	FALSE
AC019129.1	0.590801	-0.498262	0.298733	-1.66792	0.0953319	1	FALSE
AC019178.2	0.1545	0.0100395	0.1346	0.0745878	0.940543	1	FALSE
AC019181.2	17.1981	0.160781	0.426977	0.376557	0.706503	1	FALSE
AC019181.3	3.66353	-0.74651	0.461732	-1.61676	0.10593	1	FALSE
AC019185.4	0.327958	0.0481527	0.242109	0.198889	0.84235	1	FALSE
AC019186.1	0.77695	0.162876	0.398431	0.408792	0.682692	1	FALSE
AC019206.1	0.0690001	0.0151613	0.134599	0.11264	0.910316	1	FALSE
AC019330.1	0.101367	0	0.1346	0	1	1	FALSE
AC020550.7	1.62006	-0.0997362	0.2883	-0.345946	0.729383	1	FALSE
AC020571.3	7.43648	0.221661	0.428651	0.517112	0.605078	1	FALSE
AC020594.5	2.06609	-0.0403417	0.436484	-0.0924243	0.926361	1	FALSE
AC020951.1	4.25574	0.00611489	0.412515	0.0148234	0.988173	1	FALSE
AC020983.5	0.321252	0	0.153148	0	1	1	FALSE
AC021016.7	1.33709	0.212841	0.423755	0.502273	0.615476	1	FALSE
AC021021.1	0.154957	0.0100395	0.1346	0.0745878	0.940543	1	FALSE
AC021021.2	0.0615041	0.00129787	0.134599	0.0096425	0.992307	1	FALSE
AC021188.4	0.326972	0.0359145	0.224712	0.159825	0.873019	1	FALSE
AC021218.2	0.199205	0.00999335	0.1346	0.0742448	0.940816	1	FALSE
AC022007.5	40.4357	0.223728	0.333628	0.670593	0.50248	1	FALSE
AC022153.1	0.290287	0.0289639	0.172851	0.167566	0.866925	1	FALSE
AC022154.7	1.0004	-0.303692	0.414782	-0.732173	0.464063	1	FALSE
AC022182.1	9.58682	0.0945079	0.405143	0.233271	0.815551	1	FALSE
AC022182.2	6.50494	0.0310875	0.452806	0.0686554	0.945264	1	FALSE
AC022182.3	0.0857533	0	0.1346	0	1	1	FALSE
AC022201.5	4.0956	-0.242496	0.455525	-0.532344	0.594488	1	FALSE
AC022210.2	1.36803	-0.376634	0.428948	-0.878041	0.379922	1	FALSE
AC022431.3	0.343092	0.101936	0.200564	0.508246	0.611281	1	FALSE
AC022816.2	0.0519916	-0.000113961	0.134599	-0.000846664	0.999324	1	FALSE
AC022819.3	4.01985	0.44037	0.448629	0.981589	0.326302	1	FALSE
AC023115.2	65.2303	0.520354	0.369113	1.40974	0.158616	1	FALSE
AC023115.4	0.189078	0	0.1346	0	1	1	FALSE
AC023274.4	0.0496769	0	0.134599	0	1	1	FALSE
AC023469.1	0.0598839	0.000110224	0.134599	0.000818905	0.999347	1	FALSE
AC023469.2	0.0617519	0.00129787	0.134599	0.0096425	0.992307	1	FALSE
AC023481.1	0.0567977	0	0.134599	0	1	1	FALSE
AC023590.1	0.0412725	0	0.134599	0	1	1	FALSE
AC024060.1	0.403329	-0.124666	0.20506	-0.607949	0.543222	1	FALSE
AC024082.3	0.05553	0	0.134599	0	1	1	FALSE
AC024082.4	0.0955203	0	0.1346	0	1	1	FALSE
AC024162.2	0.173634	0.00831669	0.1346	0.0617881	0.950732	1	FALSE
AC024560.2	0.344059	-0.0155702	0.247951	-0.0627956	0.949929	1	FALSE
AC024560.3	394.604	-0.643591	0.387727	-1.65991	0.0969325	1	FALSE
AC024592.9	0.101805	-0.00339717	0.1346	-0.025239	0.979864	1	FALSE
AC024619.2	0.0603448	0	0.134599	0	1	1	FALSE
AC024704.2	1.82354	0.330566	0.43499	0.759939	0.447291	1	FALSE
AC024937.4	0.136902	0	0.1346	0	1	1	FALSE
AC024937.6	0.105502	0.0117623	0.1346	0.0873869	0.930364	1	FALSE
AC025165.8	0.46969	0.204271	0.249265	0.819496	0.412503	1	FALSE
AC025171.1	9.0652	-0.51709	0.406719	-1.27137	0.203598	1	FALSE
AC025335.1	55.0289	0.0531933	0.37682	0.141163	0.887741	1	FALSE
AC025442.3	0.609957	0.25399	0.331668	0.765796	0.443798	1	FALSE
AC025750.5	0.162995	0.00840903	0.1346	0.0624742	0.950185	1	FALSE
AC025918.2	0.936782	-0.260089	0.341436	-0.761749	0.44621	1	FALSE
AC026150.6	0.0421779	0	0.134599	0	1	1	FALSE
AC026167.1	0.16153	0.00774816	0.1346	0.0575642	0.954096	1	FALSE
AC026188.1	0.607868	-0.423208	0.299781	-1.41173	0.158031	1	FALSE
AC026202.3	1.81476	-0.102156	0.448529	-0.227758	0.819835	1	FALSE
AC026271.5	49.4408	0.228304	0.395178	0.577725	0.56345	1	FALSE
AC026449.1	0.0665679	0	0.134599	0	1	1	FALSE
AC026471.6	3.11436	0.0942866	0.452035	0.208583	0.834774	1	FALSE
AC026904.1	0.0685627	-0.000378403	0.134599	-0.00281133	0.997757	1	FALSE
AC026954.6	0.317391	0.00277813	0.176208	0.0157662	0.987421	1	FALSE
AC027119.1	1.17346	-0.132928	0.413334	-0.3216	0.747756	1	FALSE
AC027124.2	0.0502688	0	0.134599	0	1	1	FALSE
AC027601.1	1.6226	0.0224808	0.427311	0.0526099	0.958043	1	FALSE
AC027612.1	0.621113	0.22738	0.30685	0.741013	0.458686	1	FALSE
AC027612.4	0.501827	-0.00271684	0.275507	-0.00986125	0.992132	1	FALSE
AC034110.1	0.146904	-0.00377741	0.1346	-0.028064	0.977611	1	FALSE
AC034220.3	60.4726	-0.146826	0.299819	-0.489718	0.624334	1	FALSE
AC034243.1	20.7859	0.264649	0.394925	0.670125	0.502778	1	FALSE
AC046143.3	12.2076	0.720008	0.406323	1.77201	0.0763931	1	FALSE
AC053503.11	0.0794277	-0.000414719	0.134599	-0.00308114	0.997542	1	FALSE
AC053503.4	5.48974	-0.0213439	0.456063	-0.0468005	0.962672	1	FALSE
AC055764.1	0.159286	-0.00505546	0.1346	-0.0375592	0.970039	1	FALSE
AC055866.1	1.23041	0.270116	0.404038	0.668542	0.503788	1	FALSE
AC060834.2	6.78552	0.49715	0.453856	1.09539	0.273345	1	FALSE
AC060834.3	28.3913	0.390421	0.385672	1.01231	0.311388	1	FALSE
AC061961.2	4.12501	-0.231061	0.448507	-0.515179	0.606428	1	FALSE
AC061992.2	2.37235	-0.164145	0.452699	-0.362592	0.71691	1	FALSE
AC062017.1	4.24245	0.275745	0.453164	0.608488	0.542864	1	FALSE
AC062028.1	0.744796	-0.117315	0.324259	-0.361794	0.717506	1	FALSE
AC062029.1	80.6396	-0.290313	0.234847	-1.23618	0.216392	1	FALSE
AC063961.1	2.62155	0.19329	0.392948	0.491898	0.622791	1	FALSE
AC063980.3	1.39812	0.0548561	0.408734	0.13421	0.893237	1	FALSE
AC064834.1	0.118698	0	0.1346	0	1	1	FALSE
AC064834.2	0.0908099	0	0.134599	0	1	1	FALSE
AC064834.3	0.0485678	0	0.134599	0	1	1	FALSE
AC064836.3	0.322196	-0.0389355	0.200502	-0.19419	0.846027	1	FALSE
AC064850.4	2.1043	-0.0135896	0.445404	-0.0305107	0.97566	1	FALSE
AC064852.4	0.385474	-0.0151839	0.246124	-0.0616922	0.950808	1	FALSE
AC064853.2	0.118633	0	0.1346	0	1	1	FALSE
AC064853.3	0.098064	-0.0319016	0.134599	-0.237012	0.812648	1	FALSE
AC064875.2	4.81894	0.77877	0.449527	1.73242	0.0831987	1	FALSE
AC066692.3	0.0832888	0	0.134599	0	1	1	FALSE
AC067940.1	0.130482	-0.00380398	0.1346	-0.0282614	0.977454	1	FALSE
AC067945.3	7.56118	0.711984	0.449417	1.58424	0.113139	1	FALSE
AC067945.4	0.391126	-0.0178465	0.269697	-0.0661724	0.947241	1	FALSE
AC067959.1	0.982527	0.186919	0.353456	0.528832	0.596922	1	FALSE
AC067968.3	0.352755	0.0568828	0.269551	0.211028	0.832865	1	FALSE
AC068042.1	0.0948558	-0.0162696	0.134599	-0.120875	0.90379	1	FALSE
AC068057.1	1.91707	-0.304453	0.432289	-0.70428	0.481259	1	FALSE
AC068134.10	8.88043	-0.249489	0.428895	-0.581701	0.560768	1	FALSE
AC068134.6	0.0856536	0	0.134599	0	1	1	FALSE
AC068134.8	0.225909	0.0222258	0.1346	0.165124	0.868846	1	FALSE
AC068135.1	0.0964689	0	0.1346	0	1	1	FALSE
AC068137.13	0.0741808	0.0151613	0.134599	0.11264	0.910316	1	FALSE
AC068282.3	20.4321	-0.311441	0.339797	-0.916549	0.359379	1	FALSE
AC068490.1	2.47666	-0.0794052	0.449785	-0.17654	0.859869	1	FALSE
AC068490.2	4.27861	0.0856566	0.455781	0.187933	0.850929	1	FALSE
AC068491.3	0.330188	-0.000612115	0.248129	-0.00246692	0.998032	1	FALSE
AC068492.1	0.594482	0.160208	0.269387	0.594713	0.552035	1	FALSE
AC068499.10	5.12734	-0.693889	0.460754	-1.50599	0.132071	1	FALSE
AC068522.4	0.897626	-0.309104	0.382235	-0.808676	0.418701	1	FALSE
AC068535.3	23.4758	0.670948	0.46032	1.45757	0.144959	1	FALSE
AC068538.2	0.420312	-0.112935	0.229994	-0.491032	0.623404	1	FALSE
AC068538.4	0.0761919	-0.0301792	0.134599	-0.224215	0.82259	1	FALSE
AC068580.5	3.47996	-0.369995	0.453247	-0.816321	0.414317	1	FALSE
AC068580.6	1.59096	0.180002	0.41604	0.432656	0.665264	1	FALSE
AC068580.7	0.299223	0	0.220635	0	1	1	FALSE
AC068657.2	0.457883	-0.0273283	0.257797	-0.106007	0.915577	1	FALSE
AC068831.10	6.579	-0.480421	0.43807	-1.09668	0.272782	1	FALSE
AC068831.12	0.232405	0	0.134601	0	1	1	FALSE
AC068831.15	1.34988	0.488338	0.392948	1.24275	0.213959	1	FALSE
AC068831.16	2.00627	-0.296196	0.445175	-0.665348	0.505828	1	FALSE
AC068831.17	1.05374	0.0924663	0.413341	0.223705	0.822987	1	FALSE
AC068831.3	2.3795	-0.468909	0.457913	-1.02401	0.305829	1	FALSE
AC068831.6	1.62718	0.758604	0.42436	1.78764	0.0738337	1	FALSE
AC069063.1	0.0863772	0	0.134599	0	1	1	FALSE
AC069154.4	0.527207	0.127238	0.276114	0.460815	0.644931	1	FALSE
AC069155.1	0.0407807	0	0.134599	0	1	1	FALSE
AC069257.6	5.95681	-0.392362	0.45741	-0.85779	0.391008	1	FALSE
AC069277.2	14.9469	-0.211943	0.458579	-0.462174	0.643957	1	FALSE
AC069368.3	0.0465737	0	0.134599	0	1	1	FALSE
AC069513.4	1.67342	0.0277308	0.434771	0.0637825	0.949143	1	FALSE
AC072052.7	21.5898	-0.189483	0.373061	-0.507915	0.611513	1	FALSE
AC072061.2	0.419557	-0.0809595	0.255513	-0.316851	0.751357	1	FALSE
AC072062.1	15.3412	-0.99488	0.407325	-2.44247	0.014587	1	FALSE
AC072062.3	2.46248	0.457735	0.445608	1.02721	0.30432	1	FALSE
AC073043.1	2.48757	0.268711	0.446945	0.601217	0.547695	1	FALSE
AC073046.25	26.273	-0.0552816	0.458796	-0.120493	0.904093	1	FALSE
AC073052.1	10.483	-0.497184	0.457157	-1.08756	0.276791	1	FALSE
AC073055.2	0.0560953	0	0.134599	0	1	1	FALSE
AC073063.10	8.5395	0.239004	0.411492	0.580824	0.561359	1	FALSE
AC073065.3	0.0407807	0	0.134599	0	1	1	FALSE
AC073069.2	0.369983	0.190464	0.275079	0.692396	0.488688	1	FALSE
AC073071.1	0.106691	0.012514	0.1346	0.092972	0.925926	1	FALSE
AC073072.5	0.343087	-0.00199319	0.134614	-0.0148067	0.988186	1	FALSE
AC073072.7	0.93937	0.382668	0.391625	0.977129	0.328505	1	FALSE
AC073109.2	0.698442	-0.00690328	0.318084	-0.0217027	0.982685	1	FALSE
AC073115.6	0.198085	-0.0427932	0.139447	-0.306878	0.758936	1	FALSE
AC073115.7	0.131689	0.0273019	0.1346	0.202838	0.839262	1	FALSE
AC073130.1	0.25196	0.00598977	0.146373	0.0409211	0.967359	1	FALSE
AC073130.3	0.256338	-0.0284403	0.134601	-0.211294	0.832658	1	FALSE
AC073133.1	9.12257	0.0811303	0.419273	0.193502	0.846566	1	FALSE
AC073133.2	1.33729	0.0941995	0.424586	0.221862	0.824421	1	FALSE
AC073150.6	0.22404	0.00334216	0.134601	0.0248302	0.98019	1	FALSE
AC073254.1	0.349486	-0.0142161	0.270122	-0.0526282	0.958028	1	FALSE
AC073257.1	0.0400876	0	0.134599	0	1	1	FALSE
AC073257.2	0.29034	-0.00122136	0.17282	-0.00706725	0.994361	1	FALSE
AC073283.4	138.886	0.10681	0.352331	0.303151	0.761775	1	FALSE
AC073283.7	1.14885	-0.190538	0.390748	-0.487625	0.625816	1	FALSE
AC073284.4	2.62543	-0.0927031	0.45223	-0.204991	0.837579	1	FALSE
AC073310.4	0.335398	0.0357874	0.221861	0.161305	0.871853	1	FALSE
AC073316.1	2.07441	-0.579822	0.459045	-1.26311	0.206551	1	FALSE
AC073316.2	0.156036	-0.00585172	0.1346	-0.0434749	0.965323	1	FALSE
AC073321.4	2.37915	0.157399	0.438956	0.358576	0.719913	1	FALSE
AC073325.2	0.088232	-0.00213728	0.1346	-0.0158788	0.987331	1	FALSE
AC073326.3	0.348139	-0.0311754	0.176181	-0.176951	0.859547	1	FALSE
AC073333.8	0.265493	0.0225549	0.1476	0.152811	0.878547	1	FALSE
AC073342.12	3.03197	-0.16704	0.456227	-0.366133	0.714265	1	FALSE
AC073343.13	18.6086	-0.370467	0.421829	-0.87824	0.379814	1	FALSE
AC073410.1	6.2117	-0.167007	0.458647	-0.36413	0.715761	1	FALSE
AC073415.2	7.16748	0.213854	0.457716	0.467219	0.640343	1	FALSE
AC073465.1	0.32403	0.0754044	0.175147	0.430521	0.666816	1	FALSE
AC073465.3	0.643219	-0.224408	0.338739	-0.662482	0.507663	1	FALSE
AC073551.1	1.12704	0.525018	0.357677	1.46786	0.142144	1	FALSE
AC073621.2	0.0681886	-0.000368557	0.134599	-0.00273818	0.997815	1	FALSE
AC073657.1	0.219769	0.0515821	0.134601	0.383224	0.701554	1	FALSE
AC073834.3	0.315581	-0.00296796	0.198722	-0.0149352	0.988084	1	FALSE
AC073842.19	0.770127	0.0966902	0.379754	0.254613	0.799022	1	FALSE
AC073850.6	0.0523754	0	0.134599	0	1	1	FALSE
AC073869.2	0.194953	0	0.1346	0	1	1	FALSE
AC073900.4	0.113714	0	0.1346	0	1	1	FALSE
AC073934.6	0.181057	0	0.1346	0	1	1	FALSE
AC073957.15	1.33427	-0.535874	0.429354	-1.24809	0.211996	1	FALSE
AC074011.2	0.40637	-0.0382477	0.269865	-0.141729	0.887294	1	FALSE
AC074117.10	210.375	-0.669512	0.25681	-2.60703	0.00913313	1	FALSE
AC074117.13	1.11467	-0.221194	0.419693	-0.527038	0.598167	1	FALSE
AC074141.3	100.811	-0.344636	0.363421	-0.948313	0.34297	1	FALSE
AC074183.3	0.0926415	-0.0319016	0.134599	-0.237012	0.812648	1	FALSE
AC074212.5	170.202	-0.334711	0.363369	-0.921134	0.35698	1	FALSE
AC074212.6	36.3079	-0.366473	0.346548	-1.0575	0.290285	1	FALSE
AC074286.1	77.5187	-0.457691	0.307717	-1.48738	0.136916	1	FALSE
AC074289.1	17.471	-0.549635	0.390722	-1.40672	0.159512	1	FALSE
AC074363.1	6.42523	0.119003	0.455633	0.261181	0.793953	1	FALSE
AC074366.3	0.0567698	0	0.134599	0	1	1	FALSE
AC074367.1	0.361312	0.0378084	0.228405	0.165533	0.868525	1	FALSE
AC074391.1	0.748324	0.299439	0.369029	0.811422	0.417123	1	FALSE
AC078842.3	0.789331	-0.676863	0.400192	-1.69135	0.0907708	1	FALSE
AC078852.1	0.809887	0.00457892	0.385252	0.0118855	0.990517	1	FALSE
AC078852.2	0.897849	-0.350655	0.393414	-0.891312	0.372762	1	FALSE
AC078883.3	4.88638	0.39179	0.453373	0.864167	0.387496	1	FALSE
AC078883.4	3.33932	-0.228616	0.456057	-0.501289	0.616168	1	FALSE
AC078899.1	6.98698	-0.0348044	0.447006	-0.0778611	0.937939	1	FALSE
AC078899.3	4.23309	0.326917	0.452193	0.722959	0.469705	1	FALSE
AC078941.1	268.126	-0.403073	0.322714	-1.24901	0.211661	1	FALSE
AC079135.1	0.206606	0.0221432	0.1346	0.164511	0.869329	1	FALSE
AC079145.4	6.8202	0.0209959	0.436669	0.048082	0.961651	1	FALSE
AC079150.2	4.64051	0.434591	0.4239	1.02522	0.305259	1	FALSE
AC079154.1	0.143336	-0.00210094	0.1346	-0.0156088	0.987546	1	FALSE
AC079199.2	0.154105	0	0.1346	0	1	1	FALSE
AC079248.1	0.108102	0	0.1346	0	1	1	FALSE
AC079250.1	2.47107	0.0936794	0.450977	0.207725	0.835443	1	FALSE
AC079305.10	9.93165	0.297528	0.407538	0.73006	0.465353	1	FALSE
AC079305.11	0.194071	0	0.1346	0	1	1	FALSE
AC079305.8	0.222736	-0.0092577	0.1346	-0.0687791	0.945165	1	FALSE
AC079354.3	1.28131	0.490314	0.429837	1.1407	0.253995	1	FALSE
AC079354.5	0.914536	0.191512	0.38182	0.501578	0.615964	1	FALSE
AC079354.6	0.10869	0	0.1346	0	1	1	FALSE
AC079466.1	0.0635054	0	0.1346	0	1	1	FALSE
AC079586.1	5.1806	1.02198	0.447934	2.28153	0.0225169	1	FALSE
AC079610.1	0.422704	-0.0835228	0.205962	-0.405524	0.685092	1	FALSE
AC079610.2	8.98369	-0.10218	0.449307	-0.227417	0.8201	1	FALSE
AC079630.2	0.156329	-0.00580555	0.1346	-0.0431319	0.965596	1	FALSE
AC079630.4	1.4786	0.0646813	0.427833	0.151183	0.879831	1	FALSE
AC079741.2	0.323167	-0.0444785	0.222955	-0.199496	0.841875	1	FALSE
AC079742.4	0.70998	-0.0585246	0.342333	-0.170958	0.864257	1	FALSE
AC079767.4	0.133755	0.0273019	0.1346	0.202838	0.839262	1	FALSE
AC079776.1	2.50439	-0.624132	0.458796	-1.36037	0.173713	1	FALSE
AC079776.2	1.31306	-0.02567	0.370532	-0.0692789	0.944768	1	FALSE
AC079776.4	0.671243	0.142382	0.283577	0.502091	0.615603	1	FALSE
AC079779.4	0.695155	-0.0735015	0.342509	-0.214598	0.830081	1	FALSE
AC079779.5	0.101808	-0.00341978	0.1346	-0.025407	0.97973	1	FALSE
AC079779.6	0.0470712	0.00134403	0.134599	0.00998544	0.992033	1	FALSE
AC079780.3	3.20015	0.242846	0.425951	0.570128	0.568591	1	FALSE
AC079781.8	2.43105	0.0394841	0.417332	0.0946107	0.924624	1	FALSE
AC079807.2	21.2108	-0.200496	0.363869	-0.551011	0.581626	1	FALSE
AC079807.4	0.406904	-0.0463942	0.20476	-0.226579	0.820751	1	FALSE
AC079809.2	0.186563	0	0.1346	0	1	1	FALSE
AC079834.1	0.509242	-0.232167	0.308	-0.753789	0.450976	1	FALSE
AC079907.1	0.0666085	-0.000113961	0.134599	-0.000846664	0.999324	1	FALSE
AC079922.2	1.9334	0.0975318	0.445742	0.218808	0.8268	1	FALSE
AC079922.3	12.094	0.752715	0.431868	1.74293	0.0813466	1	FALSE
AC080094.1	0.183084	-0.00876119	0.1346	-0.0650904	0.948102	1	FALSE
AC080125.1	0.321239	-0.0871729	0.179046	-0.486874	0.626348	1	FALSE
AC083843.1	195.325	-0.390508	0.381565	-1.02344	0.306101	1	FALSE
AC083843.2	0.980401	-0.350364	0.390722	-0.896708	0.369875	1	FALSE
AC083843.4	20.7288	-0.165983	0.431344	-0.384804	0.700383	1	FALSE
AC083862.6	2.20702	0.152912	0.443044	0.34514	0.729989	1	FALSE
AC083863.5	0.064974	-0.000378403	0.134599	-0.00281133	0.997757	1	FALSE
AC083867.4	0.752274	0.504183	0.381995	1.31987	0.186879	1	FALSE
AC083873.4	4.0913	0.543383	0.448714	1.21098	0.225904	1	FALSE
AC083884.8	1.82192	0.0252134	0.438167	0.0575429	0.954113	1	FALSE
AC083899.1	0.043684	0	0.134599	0	1	1	FALSE
AC083899.3	21.2988	-0.36266	0.338579	-1.07112	0.284114	1	FALSE
AC083900.1	1.15578	0.187299	0.37936	0.493723	0.621502	1	FALSE
AC083949.1	0.784617	0.0813928	0.379027	0.214741	0.829969	1	FALSE
AC084082.3	1.12112	-0.00556175	0.395118	-0.0140762	0.988769	1	FALSE
AC084117.3	1.85784	-0.146388	0.331905	-0.441054	0.659174	1	FALSE
AC084149.2	0.624351	0.0286926	0.185131	0.154985	0.876833	1	FALSE
AC084219.4	236.612	0.0941244	0.360415	0.261156	0.793972	1	FALSE
AC084809.2	5.59486	0.258799	0.435864	0.593762	0.552671	1	FALSE
AC084809.3	3.49451	0.14658	0.453576	0.323164	0.746571	1	FALSE
AC087073.1	0.371133	0.0376146	0.227213	0.165548	0.868513	1	FALSE
AC087163.2	3.53692	-0.109575	0.455983	-0.240304	0.810095	1	FALSE
AC087163.3	0.230108	0.00659378	0.1346	0.0489878	0.960929	1	FALSE
AC087294.2	8.66477	-0.220361	0.446908	-0.493079	0.621957	1	FALSE
AC087350.1	0.125581	0.0117721	0.1346	0.0874597	0.930306	1	FALSE
AC087392.1	0.117612	0	0.1346	0	1	1	FALSE
AC087430.1	0.0835875	0	0.134599	0	1	1	FALSE
AC087491.2	1.92125	0.280256	0.432932	0.647343	0.51741	1	FALSE
AC087499.10	0.119449	0	0.1346	0	1	1	FALSE
AC087499.4	0.20807	0.00827052	0.1346	0.0614451	0.951005	1	FALSE
AC087499.5	0.535793	0.0819748	0.343928	0.238349	0.811611	1	FALSE
AC087650.1	0.312813	0.0241038	0.173762	0.138717	0.889673	1	FALSE
AC087651.2	0.0918548	0	0.1346	0	1	1	FALSE
AC090044.2	1.85089	0.165754	0.421576	0.393176	0.694189	1	FALSE
AC090286.2	1.3602	0.560355	0.406641	1.37801	0.168201	1	FALSE
AC090286.4	0.0675966	-0.000332241	0.134599	-0.00246837	0.998031	1	FALSE
AC090453.1	0.0593905	-0.00147662	0.1346	-0.0109705	0.991247	1	FALSE
AC090498.1	6.51484	-0.285446	0.445414	-0.640856	0.521616	1	FALSE
AC090505.5	0.0194384	0	0.134599	0	1	1	FALSE
AC090505.6	0.287125	0.0623101	0.13461	0.462894	0.64344	1	FALSE
AC090587.4	15.5764	0.539557	0.396442	1.361	0.173514	1	FALSE
AC090587.5	0.706663	0.11941	0.314253	0.37998	0.70396	1	FALSE
AC090602.2	0.515188	0.0748925	0.233572	0.32064	0.748483	1	FALSE
AC090616.2	18.2476	-0.127163	0.347689	-0.365736	0.714562	1	FALSE
AC090774.2	0.485086	0.023633	0.206058	0.114691	0.90869	1	FALSE
AC090804.1	0.896193	-0.0958999	0.364717	-0.262944	0.792594	1	FALSE
AC090952.5	0.390582	0.0696057	0.245996	0.282955	0.777211	1	FALSE
AC091133.1	18.2673	-0.278042	0.341403	-0.814411	0.41541	1	FALSE
AC091177.1	0.124212	0	0.1346	0	1	1	FALSE
AC091492.2	0.391951	0.0951143	0.269839	0.352485	0.724474	1	FALSE
AC091633.2	2.77407	0.308963	0.414653	0.745113	0.456203	1	FALSE
AC091633.3	3.8193	-0.138869	0.453507	-0.306212	0.759443	1	FALSE
AC091654.7	18.238	0.114034	0.348732	0.326997	0.74367	1	FALSE
AC091729.7	0.134204	-0.00509995	0.1346	-0.0378896	0.969776	1	FALSE
AC091729.9	133.33	0.179533	0.249586	0.719325	0.471941	1	FALSE
AC091801.1	0.136265	0.0104625	0.1346	0.0777305	0.938042	1	FALSE
AC091878.1	7.85719	0.376928	0.453544	0.831072	0.405933	1	FALSE
AC092013.1	4.7952	0.213221	0.452561	0.471144	0.637538	1	FALSE
AC092066.1	369.176	-0.0405671	0.296257	-0.136932	0.891084	1	FALSE
AC092106.1	0.865663	-0.725481	0.367264	-1.97537	0.0482263	1	FALSE
AC092106.2	0.0839646	0	0.134599	0	1	1	FALSE
AC092155.1	0.399303	-0.0834625	0.269564	-0.309621	0.756849	1	FALSE
AC092155.4	0.0946645	0	0.1346	0	1	1	FALSE
AC092159.1	0.235221	-0.0126596	0.144158	-0.0878171	0.930022	1	FALSE
AC092159.2	2.07598	-0.501336	0.453436	-1.10564	0.268883	1	FALSE
AC092162.1	0.561776	0	0.247604	0	1	1	FALSE
AC092168.2	0.110908	-0.00377741	0.1346	-0.028064	0.977611	1	FALSE
AC092170.1	0.0921059	-0.00180953	0.1346	-0.0134438	0.989274	1	FALSE
AC092171.2	4.64574	0.340198	0.451674	0.753193	0.451334	1	FALSE
AC092171.4	0.784426	0.0711812	0.310255	0.229428	0.818536	1	FALSE
AC092198.1	11.3155	0.349593	0.407007	0.858936	0.390376	1	FALSE
AC092295.4	1.72968	-0.102208	0.439277	-0.232673	0.816016	1	FALSE
AC092316.1	2.14072	-0.230169	0.432203	-0.532549	0.594346	1	FALSE
AC092384.1	0.0625663	0	0.134599	0	1	1	FALSE
AC092415.1	0.172835	0	0.1346	0	1	1	FALSE
AC092431.3	0.175241	0.00777953	0.1346	0.0577973	0.95391	1	FALSE
AC092535.3	0.718251	-0.0364248	0.267415	-0.136211	0.891655	1	FALSE
AC092566.1	0.162969	0	0.1346	0	1	1	FALSE
AC092569.2	3.36575	0.720427	0.447544	1.60974	0.107455	1	FALSE
AC092570.1	0.0765885	0	0.134599	0	1	1	FALSE
AC092570.3	0.118737	0	0.1346	0	1	1	FALSE
AC092570.4	0.0493142	0.00129787	0.134599	0.0096425	0.992307	1	FALSE
AC092573.2	0.296932	0.0261393	0.173584	0.150586	0.880302	1	FALSE
AC092580.3	0.0854076	0	0.134599	0	1	1	FALSE
AC092597.3	0.088304	-0.000424565	0.134599	-0.00315428	0.997483	1	FALSE
AC092610.12	0.981672	0.178242	0.390248	0.45674	0.647858	1	FALSE
AC092614.2	22.7143	0.180323	0.356143	0.506323	0.61263	1	FALSE
AC092620.2	6.35464	-0.0478992	0.415001	-0.115419	0.908113	1	FALSE
AC092620.3	0.624151	0.00970072	0.368779	0.026305	0.979014	1	FALSE
AC092625.1	0.621238	-0.23026	0.337548	-0.682154	0.495142	1	FALSE
AC092638.2	0.143367	0	0.1346	0	1	1	FALSE
AC092641.2	0.316002	-0.0360311	0.198168	-0.181821	0.855723	1	FALSE
AC092642.1	0.141236	-0.0352083	0.1346	-0.261578	0.793647	1	FALSE
AC092646.2	0.105861	-0.017946	0.1346	-0.133329	0.893933	1	FALSE
AC092664.1	0.720256	-0.144928	0.30181	-0.480196	0.631088	1	FALSE
AC092667.2	12.6117	0.529525	0.40225	1.31641	0.188037	1	FALSE
AC092669.6	0.0537187	0	0.134599	0	1	1	FALSE
AC092675.3	0.970896	0.171458	0.341071	0.502706	0.615171	1	FALSE
AC092675.4	3.06431	-0.0143392	0.456153	-0.0314351	0.974923	1	FALSE
AC092684.1	3.94483	0.168327	0.450119	0.373962	0.708433	1	FALSE
AC092687.3	0.0691422	0	0.134599	0	1	1	FALSE
AC092687.5	0.918608	0.339308	0.349965	0.969548	0.332272	1	FALSE
AC092755.4	0.770453	-0.400953	0.359507	-1.11528	0.264729	1	FALSE
AC092798.2	0.302074	0.0610751	0.195388	0.312583	0.754597	1	FALSE
AC092835.2	70.2359	-0.0062605	0.459159	-0.0136347	0.989121	1	FALSE
AC092839.3	0.634276	-0.094634	0.330984	-0.285918	0.774941	1	FALSE
AC092839.4	0.522445	-0.30786	0.284232	-1.08313	0.278751	1	FALSE
AC092881.1	0.18694	-0.00712086	0.1346	-0.0529038	0.957809	1	FALSE
AC092933.4	0.12851	-0.0336144	0.1346	-0.249736	0.802792	1	FALSE
AC093074.1	0.0596623	-0.0301792	0.134599	-0.224215	0.82259	1	FALSE
AC093084.1	0.104895	-0.0318555	0.134599	-0.236669	0.812914	1	FALSE
AC093106.4	0.192629	0.0239025	0.1346	0.177582	0.859051	1	FALSE
AC093106.6	0.0431866	0.00129787	0.134599	0.0096425	0.992307	1	FALSE
AC093107.7	0.759928	0.324152	0.38934	0.832568	0.405089	1	FALSE
AC093110.3	1.22182	-0.128942	0.401915	-0.320819	0.748347	1	FALSE
AC093142.2	0.898162	0.114939	0.317723	0.361758	0.717533	1	FALSE
AC093159.1	0.524986	0.0443838	0.330508	0.13429	0.893174	1	FALSE
AC093162.3	0.051427	0	0.134599	0	1	1	FALSE
AC093162.5	1.34302	-0.0195957	0.390565	-0.0501727	0.959985	1	FALSE
AC093323.3	539.183	0.0772011	0.279306	0.276404	0.782238	1	FALSE
AC093326.2	0.0401221	0	0.134599	0	1	1	FALSE
AC093375.1	150.37	-0.355256	0.450155	-0.789186	0.430003	1	FALSE
AC093382.1	1.96416	-0.826273	0.44634	-1.85122	0.0641378	1	FALSE
AC093388.3	4.08447	-0.0414909	0.45742	-0.0907064	0.927726	1	FALSE
AC093390.1	1.76355	0.705088	0.435219	1.62008	0.105216	1	FALSE
AC093484.4	0.152918	-0.0214376	0.1346	-0.159269	0.873457	1	FALSE
AC093495.4	3.1731	0.690294	0.446743	1.54517	0.122305	1	FALSE
AC093585.6	0.355036	0.0218179	0.177949	0.122608	0.902418	1	FALSE
AC093590.1	0.270725	0.00315744	0.134601	0.0234578	0.981285	1	FALSE
AC093609.1	1.12013	0.187989	0.416143	0.451742	0.651455	1	FALSE
AC093616.4	1.17363	0.0429069	0.403139	0.106432	0.91524	1	FALSE
AC093620.5	11.9444	0.181595	0.414651	0.437948	0.661424	1	FALSE
AC093627.10	5.41484	0.368143	0.430947	0.854264	0.392958	1	FALSE
AC093627.12	0.215158	-0.0232066	0.1346	-0.172411	0.863114	1	FALSE
AC093627.9	58.0278	0.184669	0.343393	0.537779	0.59073	1	FALSE
AC093642.1	7.24383	0.184036	0.442299	0.41609	0.677344	1	FALSE
AC093642.3	15.589	-1.0156	0.405878	-2.50222	0.0123417	1	FALSE
AC093642.5	22.5414	-0.0658575	0.411512	-0.160038	0.872851	1	FALSE
AC093673.5	155.682	0.578154	0.313719	1.8429	0.065343	1	FALSE
AC093690.1	0.054773	0	0.134599	0	1	1	FALSE
AC093698.1	0.531116	0.119907	0.322571	0.371723	0.710099	1	FALSE
AC093702.1	0.132497	0.0273019	0.1346	0.202838	0.839262	1	FALSE
AC093724.2	5.80448	0.835247	0.453446	1.842	0.0654754	1	FALSE
AC093787.1	0.166146	-0.00724961	0.1346	-0.0538603	0.957046	1	FALSE
AC093818.1	28.486	0.0539373	0.385391	0.139955	0.888696	1	FALSE
AC093838.4	725.596	-0.39569	0.243683	-1.62379	0.10442	1	FALSE
AC093850.1	0.3295	-0.0616681	0.153014	-0.403023	0.686931	1	FALSE
AC093899.3	0.118585	-0.0336242	0.1346	-0.249809	0.802735	1	FALSE
AC093901.1	8.2053	-0.171362	0.43699	-0.392142	0.694954	1	FALSE
AC096553.5	0.0940632	0	0.134599	0	1	1	FALSE
AC096559.2	0.041625	0	0.134599	0	1	1	FALSE
AC096574.4	5.91983	0.917225	0.427767	2.14422	0.0320156	1	FALSE
AC096582.8	0.251056	0	0.146675	0	1	1	FALSE
AC096582.9	0.170272	-0.00724961	0.1346	-0.0538603	0.957046	1	FALSE
AC096649.1	0.878261	-0.209573	0.380112	-0.551345	0.581397	1	FALSE
AC096649.2	0.729812	0.233485	0.36397	0.641495	0.521201	1	FALSE
AC096664.1	0.900777	0.104125	0.370429	0.281093	0.778639	1	FALSE
AC096664.2	0.290732	0.0285541	0.172044	0.165969	0.868181	1	FALSE
AC096669.2	1.67828	0.311387	0.434786	0.716184	0.473878	1	FALSE
AC096669.3	3.39401	0.760523	0.44883	1.69446	0.0901786	1	FALSE
AC096670.3	5.84111	0.227093	0.439007	0.517287	0.604956	1	FALSE
AC096775.2	0.176347	0.00886777	0.1346	0.0658823	0.947472	1	FALSE
AC097359.2	1.19818	-0.199708	0.420013	-0.475479	0.634446	1	FALSE
AC097374.2	0.0566075	0.00129787	0.134599	0.0096425	0.992307	1	FALSE
AC097381.1	0.769924	-0.183641	0.360578	-0.509297	0.610544	1	FALSE
AC097382.5	1.04787	-0.361738	0.375965	-0.962159	0.33597	1	FALSE
AC097467.2	0.351536	-0.113779	0.203728	-0.558486	0.576512	1	FALSE
AC097468.4	77.2979	0.293344	0.325559	0.901048	0.367563	1	FALSE
AC097468.7	0.810459	-0.131349	0.345175	-0.380528	0.703554	1	FALSE
AC097499.1	2.11526	0.135088	0.427427	0.316048	0.751966	1	FALSE
AC097499.2	0.0530934	0	0.134599	0	1	1	FALSE
AC097523.1	0.999994	0.150614	0.387306	0.388876	0.697368	1	FALSE
AC097523.3	0.125973	0	0.1346	0	1	1	FALSE
AC097533.1	0.293898	0.0025886	0.221209	0.0117021	0.990663	1	FALSE
AC097662.2	36.1928	-0.0706588	0.281088	-0.251376	0.801524	1	FALSE
AC097711.1	1.12868	-0.322005	0.405849	-0.793412	0.427538	1	FALSE
AC097713.3	0.104777	0	0.1346	0	1	1	FALSE
AC097713.4	0.0402889	0	0.134599	0	1	1	FALSE
AC097713.5	0.236623	0	0.134601	0	1	1	FALSE
AC097721.1	1.31727	-0.167442	0.355857	-0.470531	0.637976	1	FALSE
AC097721.2	4.25541	-0.373362	0.450263	-0.82921	0.406986	1	FALSE
AC097724.3	12.1341	-0.0848384	0.416255	-0.203813	0.838499	1	FALSE
AC098614.1	0.22105	-0.00903823	0.1346	-0.0671486	0.946463	1	FALSE
AC098614.2	14.1404	0.251359	0.423734	0.593201	0.553047	1	FALSE
AC098617.1	11.5453	-0.259139	0.454154	-0.570597	0.568273	1	FALSE
AC098795.1	0.0580552	0.00129787	0.134599	0.0096425	0.992307	1	FALSE
AC098820.2	0.281551	0	0.172395	0	1	1	FALSE
AC098820.3	4.29372	0.442756	0.443785	0.997681	0.318434	1	FALSE
AC098820.4	0.918999	0.120672	0.398026	0.303176	0.761756	1	FALSE
AC098823.3	2.52289	0.00706166	0.446837	0.0158037	0.987391	1	FALSE
AC098824.6	0.244797	-0.0248833	0.1346	-0.184868	0.853333	1	FALSE
AC098826.5	0.475322	-0.0784435	0.233817	-0.335492	0.737254	1	FALSE
AC098828.2	0.370527	-0.00625841	0.204896	-0.0305444	0.975633	1	FALSE
AC098828.3	0.253349	-0.0107053	0.134601	-0.079534	0.936608	1	FALSE
AC098973.1	0.0699518	0	0.134599	0	1	1	FALSE
AC098973.2	18.9065	0.403814	0.427789	0.943956	0.345192	1	FALSE
AC099342.1	0.155299	0.0100591	0.1346	0.0747332	0.940427	1	FALSE
AC099344.3	0.0393774	0	0.134599	0	1	1	FALSE
AC099535.4	0.766987	0.543324	0.379512	1.43164	0.152248	1	FALSE
AC099552.4	0.449887	-0.102201	0.275675	-0.370731	0.710838	1	FALSE
AC099668.5	0.241263	0.0539886	0.167807	0.321729	0.747658	1	FALSE
AC099684.1	6.23911	0.0422834	0.436287	0.0969166	0.922793	1	FALSE
AC099754.1	0.229637	0	0.134601	0	1	1	FALSE
AC099850.1	5.53261	-0.120985	0.450088	-0.268802	0.788082	1	FALSE
AC100830.3	4.44106	0.166232	0.447237	0.371686	0.710127	1	FALSE
AC100830.4	7.81921	0.169384	0.41123	0.411897	0.680415	1	FALSE
AC100830.5	1.6282	0.288639	0.377595	0.764415	0.44462	1	FALSE
AC100848.1	0.12023	-0.00377741	0.1346	-0.028064	0.977611	1	FALSE
AC102953.4	0.160663	-0.00829171	0.1346	-0.0616024	0.950879	1	FALSE
AC103563.9	0.0566015	0	0.134599	0	1	1	FALSE
AC103564.6	0.227756	0.040923	0.143231	0.285712	0.775098	1	FALSE
AC103564.7	0.596736	-0.094652	0.317472	-0.298143	0.765594	1	FALSE
AC104024.1	0.0373626	0	0.134599	0	1	1	FALSE
AC104058.1	0.442908	-0.100628	0.274516	-0.366563	0.713945	1	FALSE
AC104076.2	0.0665692	0	0.134599	0	1	1	FALSE
AC104076.3	0.428031	-0.0706122	0.250658	-0.281708	0.778168	1	FALSE
AC104113.3	0.0413494	0.00134403	0.134599	0.00998544	0.992033	1	FALSE
AC104131.1	0.117539	0	0.1346	0	1	1	FALSE
AC104134.2	1.09346	0.371678	0.414114	0.897527	0.369438	1	FALSE
AC104297.1	1.69394	0.450562	0.43224	1.04239	0.297232	1	FALSE
AC104304.4	0.039183	0	0.134599	0	1	1	FALSE
AC104306.1	0.601956	0.120355	0.244925	0.491397	0.623146	1	FALSE
AC104308.2	0.0552898	0	0.134599	0	1	1	FALSE
AC104389.28	0.421713	0.0569302	0.311801	0.182585	0.855124	1	FALSE
AC104389.32	0.185245	0	0.1346	0	1	1	FALSE
AC104451.2	0.245732	0	0.1346	0	1	1	FALSE
AC104532.4	1.77387	-0.497055	0.448756	-1.10763	0.268022	1	FALSE
AC104534.2	0.614129	0.152129	0.310033	0.490685	0.623649	1	FALSE
AC104581.1	0.0629223	-0.000424568	0.134599	-0.00315431	0.997483	1	FALSE
AC104634.3	0.136773	-0.00509995	0.1346	-0.0378896	0.969776	1	FALSE
AC104651.2	1.85549	0.0204606	0.431989	0.0473636	0.962223	1	FALSE
AC104653.1	3.0448	0.302782	0.45018	0.67258	0.501214	1	FALSE
AC104654.1	0.133669	-0.00377742	0.1346	-0.0280641	0.977611	1	FALSE
AC104655.3	53.8016	0.294842	0.290451	1.01512	0.31005	1	FALSE
AC104667.3	9.00891	0.267102	0.438785	0.608732	0.542702	1	FALSE
AC104698.2	0.09125	-0.0163158	0.134599	-0.121218	0.903519	1	FALSE
AC104699.1	0.140615	-0.0371655	0.1346	-0.276118	0.782458	1	FALSE
AC104809.2	0.0622613	0	0.134599	0	1	1	FALSE
AC104820.2	0.251985	0.00593916	0.147494	0.0402672	0.96788	1	FALSE
AC104843.3	0.854539	-0.621173	0.41191	-1.50803	0.131547	1	FALSE
AC104978.1	0.0610107	-0.000424565	0.134599	-0.00315428	0.997483	1	FALSE
AC105052.1	1.96113	-0.730812	0.448158	-1.6307	0.102954	1	FALSE
AC105053.3	0.071186	-0.00264196	0.1346	-0.0196283	0.98434	1	FALSE
AC105339.1	1.54214	0.0813857	0.432908	0.187997	0.850879	1	FALSE
AC105342.1	0.491266	0.0520122	0.22643	0.229705	0.818321	1	FALSE
AC105399.2	1.11863	-0.0117153	0.267184	-0.0438472	0.965026	1	FALSE
AC105402.2	1.79035	0.408904	0.4262	0.959418	0.337348	1	FALSE
AC105402.3	2.56004	0.420714	0.446576	0.942087	0.346148	1	FALSE
AC105402.4	2.74497	-0.181388	0.453468	-0.400001	0.689156	1	FALSE
AC105760.2	23.7826	-0.011143	0.333743	-0.033388	0.973365	1	FALSE
AC105760.3	0.700255	-0.157691	0.277729	-0.567787	0.57018	1	FALSE
AC106053.1	0.140685	0	0.1346	0	1	1	FALSE
AC106782.20	0.499577	-0.124926	0.342707	-0.364528	0.715463	1	FALSE
AC106786.1	0.649003	0.355745	0.349156	1.01887	0.308265	1	FALSE
AC106869.2	0.104518	-0.0332851	0.1346	-0.24729	0.804684	1	FALSE
AC106874.1	0.198613	0	0.1346	0	1	1	FALSE
AC106875.1	1.88317	-0.027544	0.430899	-0.0639222	0.949032	1	FALSE
AC106900.6	0.120598	-0.00372144	0.1346	-0.0276482	0.977943	1	FALSE
AC107072.2	0.937439	0.151152	0.336873	0.448691	0.653655	1	FALSE
AC107081.5	0.232022	0.00489076	0.134601	0.0363353	0.971015	1	FALSE
AC107218.3	1.06296	-0.0635826	0.391881	-0.16225	0.871109	1	FALSE
AC107983.4	0.0586588	0	0.134599	0	1	1	FALSE
AC108004.2	0.173993	0	0.1346	0	1	1	FALSE
AC108004.3	0.266526	0.0544972	0.171188	0.318347	0.750221	1	FALSE
AC108025.2	6.71451	-0.373247	0.440484	-0.847355	0.396797	1	FALSE
AC108039.1	0.309482	-0.0306064	0.200657	-0.152531	0.878768	1	FALSE
AC108039.3	0.302462	-0.0423683	0.222999	-0.189993	0.849314	1	FALSE
AC108051.2	0.134457	0.0100395	0.1346	0.0745878	0.940543	1	FALSE
AC108051.3	0.233291	-0.0266427	0.134601	-0.197939	0.843093	1	FALSE
AC108059.1	0.110065	-0.00385995	0.1346	-0.0286772	0.977122	1	FALSE
AC108142.1	74.0012	0.0328322	0.336122	0.0976795	0.922187	1	FALSE
AC108448.2	0.723631	0.00654501	0.350195	0.0186896	0.985089	1	FALSE
AC108463.1	0.0836321	0.0151613	0.134599	0.11264	0.910316	1	FALSE
AC108463.2	3.71206	-0.508033	0.451892	-1.12423	0.260914	1	FALSE
AC108479.2	0.707648	-0.0866463	0.340511	-0.254459	0.799141	1	FALSE
AC108488.4	54.7585	0.154989	0.362932	0.427045	0.669347	1	FALSE
AC108676.1	1.63868	9.07033e-05	0.443499	0.000204517	0.999837	1	FALSE
AC108868.6	0.127611	-0.00386975	0.1346	-0.0287501	0.977064	1	FALSE
AC108925.1	0.118444	0.0118182	0.1346	0.0878027	0.930033	1	FALSE
AC109333.10	1.06046	0.448085	0.386176	1.16031	0.245921	1	FALSE
AC109631.1	0.103532	0	0.1346	0	1	1	FALSE
AC109642.1	3.85802	0.602087	0.444232	1.35534	0.175308	1	FALSE
AC109815.2	0.16995	-0.008268	0.1346	-0.0614263	0.95102	1	FALSE
AC109826.1	0.0934113	-0.00214711	0.1346	-0.0159518	0.987273	1	FALSE
AC109829.1	0.767081	0.0465203	0.352458	0.131988	0.894994	1	FALSE
AC110299.5	1.41785	0.704669	0.416906	1.69024	0.0909826	1	FALSE
AC110615.1	0.843588	-0.08858	0.362914	-0.24408	0.807169	1	FALSE
AC110769.3	0.81265	0.0210177	0.363838	0.0577667	0.953934	1	FALSE
AC110781.3	0.206759	-0.0235022	0.1346	-0.174607	0.861388	1	FALSE
AC110926.4	0.376735	-0.0137174	0.245132	-0.0559592	0.955374	1	FALSE
AC111155.1	0.163301	0	0.1346	0	1	1	FALSE
AC111200.7	0.322847	0	0.175682	0	1	1	FALSE
AC112198.1	0.905091	-0.0780019	0.38338	-0.203459	0.838777	1	FALSE
AC112220.2	0.0555671	0.00129787	0.134599	0.0096425	0.992307	1	FALSE
AC112229.1	1.84497	-0.0149305	0.431453	-0.0346052	0.972395	1	FALSE
AC112497.1	0.374218	0.0396713	0.134671	0.294579	0.768315	1	FALSE
AC112715.2	0.508479	0.0381969	0.187112	0.204139	0.838245	1	FALSE
AC113189.5	117.467	0.544769	0.333595	1.63303	0.102463	1	FALSE
AC113404.1	5.43556	0.0295108	0.441604	0.0668264	0.94672	1	FALSE
AC113617.1	0.119891	0	0.1346	0	1	1	FALSE
AC114271.2	103.822	0.142861	0.296327	0.482107	0.62973	1	FALSE
AC114730.11	0.223628	-0.040423	0.1346	-0.300318	0.763934	1	FALSE
AC114730.2	0.638698	-0.145217	0.353341	-0.410984	0.681084	1	FALSE
AC114730.3	0.0730052	0	0.134599	0	1	1	FALSE
AC114730.5	0.509162	0.01927	0.338358	0.0569515	0.954584	1	FALSE
AC114730.7	0.0666197	0	0.134599	0	1	1	FALSE
AC114730.8	1.04766	0.018625	0.356014	0.0523153	0.958277	1	FALSE
AC114755.3	0.0704637	-0.000378403	0.134599	-0.00281133	0.997757	1	FALSE
AC114755.4	0.0482448	0	0.134599	0	1	1	FALSE
AC114760.1	0.211023	0	0.1346	0	1	1	FALSE
AC114803.3	0.806862	-0.019332	0.274644	-0.0703893	0.943884	1	FALSE
AC114877.3	0.350712	-0.0286094	0.180706	-0.15832	0.874204	1	FALSE
AC115522.3	0.0656099	-0.030133	0.134599	-0.223872	0.822857	1	FALSE
AC115617.2	4.07685	-0.339886	0.453851	-0.748894	0.453921	1	FALSE
AC116035.1	0.0194384	0	0.134599	0	1	1	FALSE
AC116366.5	0.523845	-0.113706	0.284358	-0.399868	0.689254	1	FALSE
AC116366.6	3.44836	0.145895	0.449925	0.324266	0.745736	1	FALSE
AC116609.2	4.36536	-0.712518	0.456814	-1.55975	0.118818	1	FALSE
AC116609.3	0.327456	-0.0741665	0.200057	-0.370728	0.71084	1	FALSE
AC116614.1	7.94627	-0.266464	0.435027	-0.612524	0.540191	1	FALSE
AC117490.2	0.119706	0	0.1346	0	1	1	FALSE
AC117947.1	0.501518	-0.0585968	0.277925	-0.210837	0.833015	1	FALSE
AC118754.4	0.100925	0.0134387	0.1346	0.0998422	0.92047	1	FALSE
AC119403.1	0.15428	0	0.1346	0	1	1	FALSE
AC123023.1	15.7183	-0.0803378	0.411273	-0.195339	0.845127	1	FALSE
AC123900.2	0.0369054	0	0.134599	0	1	1	FALSE
AC124789.1	5.82895	0.628956	0.436122	1.44215	0.149259	1	FALSE
AC124861.1	0.28225	0	0.198294	0	1	1	FALSE
AC124944.3	0.163328	-0.00715726	0.1346	-0.0531742	0.957593	1	FALSE
AC124944.4	0.0793399	0	0.134599	0	1	1	FALSE
AC124944.5	1.44562	0.210733	0.412509	0.510856	0.609452	1	FALSE
AC125232.1	69.0429	0.101265	0.252144	0.401615	0.687968	1	FALSE
AC125238.2	0.895531	-0.754906	0.408937	-1.84602	0.0648894	1	FALSE
AC125421.1	0.903587	-0.0119266	0.3942	-0.0302552	0.975863	1	FALSE
AC126365.1	0.162012	0	0.1346	0	1	1	FALSE
AC126407.1	41.7716	-0.213606	0.331506	-0.64435	0.519349	1	FALSE
AC126544.4	7.72835	-0.218654	0.455541	-0.479987	0.631237	1	FALSE
AC127391.3	0.0510392	0	0.134599	0	1	1	FALSE
AC127904.2	25.1692	0.0707186	0.460778	0.153477	0.878023	1	FALSE
AC129492.1	0.31899	0.0807577	0.134665	0.599691	0.548712	1	FALSE
AC129492.6	22.5014	-0.266987	0.369852	-0.721876	0.470371	1	FALSE
AC130469.2	0.4598	0.0559036	0.184545	0.302927	0.761945	1	FALSE
AC131056.3	2.78149	-0.145535	0.456768	-0.318619	0.750015	1	FALSE
AC131097.4	0.71201	0.30658	0.351319	0.872654	0.382852	1	FALSE
AC132008.1	2.29726	0.234324	0.451677	0.518786	0.60391	1	FALSE
AC133633.2	0.0446589	0	0.134599	0	1	1	FALSE
AC133644.2	0.149444	0	0.1346	0	1	1	FALSE
AC133680.1	1.87065	-0.29671	0.410868	-0.722153	0.470201	1	FALSE
AC133785.1	0.259108	0.0185221	0.134601	0.137608	0.89055	1	FALSE
AC135048.13	0.327781	0.04138	0.13463	0.307362	0.758568	1	FALSE
AC135178.7	0.194177	-0.0232066	0.1346	-0.172411	0.863114	1	FALSE
AC136289.1	2.22605	0.253747	0.447186	0.567431	0.570421	1	FALSE
AC136352.3	10.2186	0.161083	0.453476	0.355219	0.722426	1	FALSE
AC137723.5	2.65736	0.150459	0.451631	0.333146	0.739024	1	FALSE
AC137932.4	4.0987	-0.0676946	0.452453	-0.149617	0.881067	1	FALSE
AC137932.5	11.761	-0.0339487	0.405672	-0.083685	0.933307	1	FALSE
AC137932.6	5.71094	0.361153	0.451238	0.80036	0.423502	1	FALSE
AC137934.1	1.45478	0.355939	0.440182	0.808617	0.418736	1	FALSE
AC138035.2	19.1648	-0.527617	0.46009	-1.14677	0.251477	1	FALSE
AC138430.4	6.12812	0.204103	0.44434	0.459341	0.64599	1	FALSE
AC138472.4	0.0491563	0	0.134599	0	1	1	FALSE
AC138517.4	0.525631	-0.0369606	0.294427	-0.125534	0.900101	1	FALSE
AC138517.6	0.0844428	0	0.134599	0	1	1	FALSE
AC138623.1	0.154465	0.0100129	0.1346	0.0743901	0.9407	1	FALSE
AC138645.2	0.110365	0	0.1346	0	1	1	FALSE
AC138969.4	6.9372	-0.857724	0.457156	-1.87622	0.0606256	1	FALSE
AC139099.4	0.0496531	0.00129787	0.134599	0.0096425	0.992307	1	FALSE
AC139100.3	10.1033	0.239445	0.406606	0.588886	0.555937	1	FALSE
AC139100.4	17.707	0.387448	0.416863	0.929438	0.352662	1	FALSE
AC139103.1	0.207435	-0.00884378	0.1346	-0.0657039	0.947614	1	FALSE
AC139143.2	0.267648	-0.0166198	0.149027	-0.111522	0.911202	1	FALSE
AC139712.2	0.594241	0.000621421	0.326393	0.00190391	0.998481	1	FALSE
AC139887.4	4.78252	0.410295	0.440535	0.931356	0.351669	1	FALSE
AC140076.1	0.407423	0.0291345	0.231602	0.125796	0.899894	1	FALSE
AC140481.8	2.96169	-0.0314273	0.455602	-0.0689798	0.945006	1	FALSE
AC140542.2	0.166848	0.0117161	0.1346	0.0870438	0.930637	1	FALSE
AC140912.1	0.411829	0.141775	0.228822	0.619588	0.535529	1	FALSE
AC141586.5	64.9032	0.193022	0.399872	0.482709	0.629303	1	FALSE
AC141928.1	21.7165	-0.311059	0.381109	-0.816196	0.414388	1	FALSE
AC142119.1	0.84636	0.0724426	0.342664	0.21141	0.832567	1	FALSE
AC142472.6	42.7016	0.272777	0.356144	0.765919	0.443724	1	FALSE
AC142528.1	2.73103	-0.638515	0.451187	-1.41519	0.157014	1	FALSE
AC144449.1	23.9585	0.139563	0.368253	0.378987	0.704697	1	FALSE
AC144450.1	0.575903	0.113617	0.338527	0.335621	0.737156	1	FALSE
AC144450.2	1.11335	0.0909193	0.404348	0.224854	0.822093	1	FALSE
AC144530.1	10.6278	0.363947	0.45659	0.797099	0.425394	1	FALSE
AC144568.4	0.122382	0	0.1346	0	1	1	FALSE
AC144652.1	25.2962	0.253592	0.421617	0.601477	0.547523	1	FALSE
AC144831.1	266.146	0.10228	0.341043	0.299904	0.76425	1	FALSE
AC144831.3	61.5087	0.0526069	0.348334	0.151024	0.879956	1	FALSE
AC144833.1	0.688581	0.138556	0.298267	0.464538	0.642263	1	FALSE
AC144835.1	0.646205	0.0607681	0.326805	0.185946	0.852487	1	FALSE
AC145110.1	0.0744767	0	0.134599	0	1	1	FALSE
AC145123.2	0.328461	0.103669	0.179082	0.57889	0.562664	1	FALSE
AC145124.2	7.09968	-0.0222219	0.44097	-0.0503932	0.959809	1	FALSE
AC145343.2	1.02589	0.442691	0.407577	1.08615	0.277411	1	FALSE
AC145676.2	0.125684	-0.00507747	0.1346	-0.0377227	0.969909	1	FALSE
AC147651.1	0.0991797	0.0151613	0.134599	0.11264	0.910316	1	FALSE
AC147651.4	0.117802	0	0.1346	0	1	1	FALSE
AC156455.1	20.6944	0.0410995	0.36675	0.112064	0.910773	1	FALSE
AC159540.1	8.40526	0.0816289	0.426089	0.191577	0.848073	1	FALSE
AC195454.1	0.35536	0.036763	0.246505	0.149137	0.881446	1	FALSE
AC213203.1	0.730161	0.113077	0.345479	0.327306	0.743436	1	FALSE
AC226118.1	7.59224	0.093537	0.452054	0.206916	0.836076	1	FALSE
AC231657.1	1.289	0.0586489	0.370427	0.158328	0.874198	1	FALSE
AC234582.1	0.141902	-0.00545398	0.1346	-0.0405199	0.967679	1	FALSE
AC234582.2	0.148486	-0.00382358	0.1346	-0.028407	0.977338	1	FALSE
AC240274.1	148.772	-0.286879	0.415367	-0.690663	0.489777	1	FALSE
AC241377.1	0.534975	-0.159585	0.333328	-0.478763	0.632107	1	FALSE
AC241585.1	15.483	0.110459	0.453258	0.2437	0.807463	1	FALSE
AC243756.1	0.170594	0	0.1346	0	1	1	FALSE
AC245100.1	48.0252	-0.0835856	0.368346	-0.226922	0.820485	1	FALSE
ACA59	0.0675966	-0.000332241	0.134599	-0.00246837	0.998031	1	FALSE
ACA64	8.44232	-0.266078	0.429058	-0.620145	0.535162	1	FALSE
ACAA1	2648.75	0.484645	0.27094	1.78875	0.0736545	1	FALSE
ACAA2	2229.52	0.408011	0.196789	2.07335	0.03814	1	FALSE
ACACA	2319.54	0.0928452	0.214244	0.433362	0.664752	1	FALSE
ACACB	1217.99	-0.211254	0.338254	-0.624541	0.532272	1	FALSE
ACAD10	994.788	-0.177894	0.169742	-1.04803	0.294627	1	FALSE
ACAD11	35.4781	-0.739682	0.339531	-2.17854	0.0293656	1	FALSE
ACAD8	989.744	-0.0247442	0.221164	-0.111881	0.910917	1	FALSE
ACAD9	1008.59	0.170516	0.183154	0.930997	0.351855	1	FALSE
ACADL	9.39229	-0.303503	0.420557	-0.721669	0.470498	1	FALSE
ACADM	1362.57	-0.201078	0.271408	-0.74087	0.458772	1	FALSE
ACADS	443.225	0.694359	0.35839	1.93744	0.0526919	1	FALSE
ACADSB	780.031	-0.441438	0.317621	-1.38983	0.164581	1	FALSE
ACADVL	12546.1	-0.0767767	0.216808	-0.354123	0.723247	1	FALSE
ACAN	446.241	-0.243278	0.358719	-0.678183	0.497656	1	FALSE
ACAP1	12.1986	0.579507	0.444922	1.30249	0.192748	1	FALSE
ACAP2	932.576	-0.509181	0.353609	-1.43996	0.14988	1	FALSE
ACAP2-IT1	7.29078	-0.311912	0.456511	-0.683252	0.494448	1	FALSE
ACAP3	2693.48	-0.380589	0.215867	-1.76307	0.0778891	1	FALSE
ACAT1	698.922	0.340574	0.265175	1.28434	0.199024	1	FALSE
ACAT2	1137.47	0.450737	0.313417	1.43814	0.150395	1	FALSE
ACBD3	1337.94	-0.25091	0.267357	-0.938482	0.347997	1	FALSE
ACBD4	278.394	0.0129687	0.305133	0.0425017	0.966099	1	FALSE
ACBD5	583.037	-0.308088	0.314648	-0.979152	0.327505	1	FALSE
ACBD6	1174.41	0.36587	0.222826	1.64196	0.100599	1	FALSE
ACBD7	119.313	-0.376834	0.396322	-0.950828	0.341692	1	FALSE
ACCS	426.083	-0.575062	0.286048	-2.01037	0.0443922	1	FALSE
ACCSL	0.238061	0.00487079	0.134601	0.036187	0.971133	1	FALSE
ACD	507.616	0.417387	0.349397	1.19459	0.232247	1	FALSE
ACE	126.599	-0.342089	0.227225	-1.50551	0.132193	1	FALSE
ACE2	7.76143	-0.542366	0.426795	-1.27079	0.203804	1	FALSE
ACER1	0.437376	0.0344963	0.251084	0.137389	0.890723	1	FALSE
ACER2	86.5463	-0.565046	0.429248	-1.31636	0.188053	1	FALSE
ACER3	855.806	-0.206146	0.282217	-0.730453	0.465113	1	FALSE
ACHE	254.215	0.031212	0.321573	0.0970604	0.922678	1	FALSE
ACIN1	10378.5	0.0279469	0.223858	0.124842	0.900649	1	FALSE
ACKR1	53.4428	0.0174214	0.379925	0.0458549	0.963426	1	FALSE
ACKR2	10.9557	0.282316	0.409256	0.689827	0.490303	1	FALSE
ACKR3	477.238	0.108901	0.428164	0.254343	0.799231	1	FALSE
ACKR4	0.160379	-0.00544419	0.1346	-0.0404472	0.967737	1	FALSE
ACLY	6583.97	0.0306508	0.234327	0.130804	0.895931	1	FALSE
ACMSD	0.388377	0.197703	0.226813	0.871654	0.383397	1	FALSE
ACO1	945.839	0.221166	0.154323	1.43314	0.151818	1	FALSE
ACO2	2409.44	0.299936	0.203868	1.47122	0.141231	1	FALSE
ACOT1	18.5391	0.225258	0.379994	0.592794	0.553319	1	FALSE
ACOT11	61.956	0.741588	0.293693	2.52505	0.0115683	1	FALSE
ACOT12	3.09922	0.633594	0.44634	1.41953	0.155744	1	FALSE
ACOT13	1090.03	0.500822	0.274814	1.8224	0.0683938	1	FALSE
ACOT2	109.266	0.174647	0.365175	0.478256	0.632468	1	FALSE
ACOT4	23.6075	0.903634	0.397016	2.27606	0.0228423	1	FALSE
ACOT6	0.646596	0.270855	0.308047	0.879265	0.379258	1	FALSE
ACOT7	840.591	0.607476	0.345872	1.75636	0.0790268	1	FALSE
ACOT8	610.079	0.609364	0.329836	1.84748	0.0646783	1	FALSE
ACOT9	594.408	0.064732	0.141273	0.458204	0.646806	1	FALSE
ACOX1	1565.83	-0.365716	0.246122	-1.48591	0.137302	1	FALSE
ACOX2	243.274	0.212772	0.326649	0.651379	0.514802	1	FALSE
ACOX3	268.426	0.310832	0.208683	1.48949	0.136358	1	FALSE
ACOXL	7.4711	0.483378	0.444829	1.08666	0.277187	1	FALSE
ACP1	2675.34	0.127883	0.148824	0.859289	0.390181	1	FALSE
ACP2	1594.01	0.147675	0.267216	0.552642	0.580509	1	FALSE
ACP5	42.3442	0.745953	0.382201	1.95173	0.0509701	1	FALSE
ACP6	840.592	-0.028823	0.282727	-0.101946	0.918799	1	FALSE
ACP7	0.382449	-0.148126	0.228744	-0.647564	0.517267	1	FALSE
ACPP	125.455	-0.272424	0.30098	-0.905123	0.3654	1	FALSE
ACR	8.25968	-0.147538	0.441432	-0.334226	0.738209	1	FALSE
ACRBP	38.7201	-0.516078	0.334395	-1.54332	0.122753	1	FALSE
ACRC	47.5345	0.334316	0.337247	0.991307	0.321536	1	FALSE
ACRV1	1.39697	-0.428272	0.434567	-0.985514	0.324372	1	FALSE
ACSBG1	1.2574	0.0529793	0.423055	0.12523	0.900341	1	FALSE
ACSBG2	3.38484	0.0886573	0.452792	0.195801	0.844766	1	FALSE
ACSF2	706.492	0.158202	0.328401	0.481734	0.629995	1	FALSE
ACSF3	684.545	0.137601	0.200837	0.685134	0.493259	1	FALSE
ACSL1	2055.1	0.04056	0.286866	0.14139	0.887562	1	FALSE
ACSL3	1393.67	-0.225257	0.268445	-0.839118	0.401403	1	FALSE
ACSL4	683.866	-0.341243	0.322129	-1.05934	0.289447	1	FALSE
ACSL5	11.122	0.385369	0.455749	0.845572	0.397791	1	FALSE
ACSL6	7.24346	0.205136	0.44709	0.458824	0.64636	1	FALSE
ACSM1	19.071	0.121211	0.384873	0.314937	0.75281	1	FALSE
ACSM2A	0.0729158	-0.000424565	0.134599	-0.00315428	0.997483	1	FALSE
ACSM3	1591.9	0.105631	0.322556	0.327481	0.743304	1	FALSE
ACSM5	0.111378	-0.00210094	0.1346	-0.0156088	0.987546	1	FALSE
ACSM6	0.283018	-0.0552439	0.150544	-0.366962	0.713648	1	FALSE
ACSS1	32.7914	0.0129369	0.361222	0.0358143	0.97143	1	FALSE
ACSS2	538.609	-0.106757	0.290829	-0.367079	0.71356	1	FALSE
ACSS3	917.581	-0.392394	0.29178	-1.34483	0.178681	1	FALSE
ACTA1	1422.95	0.553123	0.438194	1.26228	0.206849	1	FALSE
ACTA2	178.852	0.283926	0.461421	0.615329	0.538337	1	FALSE
ACTA2-AS1	0.498905	0.115111	0.311067	0.370052	0.711344	1	FALSE
ACTB	56249.8	0.301237	0.317527	0.948697	0.342775	1	FALSE
ACTBL2	0.346772	-0.116926	0.202128	-0.578474	0.562944	1	FALSE
ACTBP1	0.630283	-0.0473456	0.36918	-0.128245	0.897955	1	FALSE
ACTBP11	4.02246	0.288984	0.453018	0.637909	0.523533	1	FALSE
ACTBP12	0.0913325	0.0134849	0.1346	0.100185	0.920197	1	FALSE
ACTBP13	1.30837	0.178767	0.400107	0.446798	0.655021	1	FALSE
ACTBP14	0.342648	-0.10043	0.227142	-0.442146	0.658384	1	FALSE
ACTBP2	13.3555	-0.0633163	0.407434	-0.155403	0.876504	1	FALSE
ACTBP6	0.0577222	0	0.134599	0	1	1	FALSE
ACTBP7	1.6284	0.271191	0.407117	0.666125	0.505331	1	FALSE
ACTBP8	1.07634	0.199152	0.412541	0.482745	0.629277	1	FALSE
ACTBP9	1.72318	0.143225	0.400797	0.357351	0.720829	1	FALSE
ACTC1	1696.5	0.666163	0.446117	1.49325	0.135372	1	FALSE
ACTG1	69575.9	0.379765	0.278986	1.36124	0.173439	1	FALSE
ACTG1P1	19.5048	0.169283	0.387124	0.437284	0.661905	1	FALSE
ACTG1P10	0.808972	0.264552	0.376607	0.702461	0.482392	1	FALSE
ACTG1P12	0.358363	0.020429	0.228142	0.0895452	0.928649	1	FALSE
ACTG1P14	7.8058	0.691831	0.439927	1.5726	0.115811	1	FALSE
ACTG1P15	1.15706	-0.318948	0.379151	-0.841216	0.400227	1	FALSE
ACTG1P16	0.301194	-0.107484	0.175412	-0.612754	0.540039	1	FALSE
ACTG1P17	11.4851	0.127266	0.429417	0.29637	0.766947	1	FALSE
ACTG1P18	0.0423793	0	0.134599	0	1	1	FALSE
ACTG1P19	0.274034	-0.0283256	0.194998	-0.14526	0.884505	1	FALSE
ACTG1P20	10.2775	-0.0680788	0.448026	-0.151953	0.879224	1	FALSE
ACTG1P21	0.515108	-0.12983	0.303588	-0.427653	0.668904	1	FALSE
ACTG1P22	0.0963708	-0.00213728	0.1346	-0.0158788	0.987331	1	FALSE
ACTG1P23	0.561658	-0.00750148	0.257883	-0.0290887	0.976794	1	FALSE
ACTG1P24	4.83855	-0.286145	0.458778	-0.62371	0.532818	1	FALSE
ACTG1P3	5.76134	0.41572	0.449263	0.925339	0.35479	1	FALSE
ACTG1P9	1.33867	0.0897662	0.413939	0.216859	0.828318	1	FALSE
ACTG2	70.4677	0.861989	0.408071	2.11235	0.0346566	1	FALSE
ACTL10	11.9541	0.362578	0.430674	0.841883	0.399853	1	FALSE
ACTL6A	1727.51	0.367695	0.229774	1.60025	0.109543	1	FALSE
ACTL6B	111.197	0.182094	0.427315	0.426137	0.670008	1	FALSE
ACTL7B	0.409379	0.0332528	0.275289	0.120793	0.903855	1	FALSE
ACTL8	0.129936	0	0.1346	0	1	1	FALSE
ACTN1	4062.19	0.185348	0.264129	0.701732	0.482846	1	FALSE
ACTN1-AS1	1.74329	0.273464	0.443285	0.616903	0.537299	1	FALSE
ACTN2	4.0409	0.14115	0.45576	0.309703	0.756787	1	FALSE
ACTN3	124.832	0.754082	0.398153	1.89395	0.058232	1	FALSE
ACTN4	13441.5	0.291961	0.238222	1.22558	0.220356	1	FALSE
ACTN4P1	2.93668	0.369567	0.449112	0.822885	0.410574	1	FALSE
ACTN4P2	0.0718468	0.0151613	0.134599	0.11264	0.910316	1	FALSE
ACTP1	0.0714858	0	0.134599	0	1	1	FALSE
ACTR10	1627.12	0.394178	0.222021	1.77541	0.075831	1	FALSE
ACTR1A	4434.68	0.415738	0.214985	1.9338	0.0531374	1	FALSE
ACTR1B	2328.89	0.422032	0.253213	1.66671	0.0955728	1	FALSE
ACTR2	6142.78	-0.380968	0.344647	-1.10539	0.268992	1	FALSE
ACTR3	5294.11	-0.0190139	0.240357	-0.079107	0.936947	1	FALSE
ACTR3B	298.654	0.316008	0.209966	1.50504	0.132313	1	FALSE
ACTR3C	11.0975	0.338751	0.435374	0.778068	0.436529	1	FALSE
ACTR3P2	0.581086	0.195805	0.342242	0.572126	0.567237	1	FALSE
ACTR3P3	0.0740584	0	0.134599	0	1	1	FALSE
ACTR5	202.735	0.20507	0.245995	0.833637	0.404486	1	FALSE
ACTR6	509.335	0.131122	0.226505	0.57889	0.562663	1	FALSE
ACTR8	992.508	0.0403273	0.224936	0.179284	0.857715	1	FALSE
ACTRT1	0.204799	-0.0230947	0.1346	-0.17158	0.863768	1	FALSE
ACTRT2	0.383316	-0.0355204	0.179583	-0.197794	0.843207	1	FALSE
ACTRT3	53.5073	0.0265282	0.350667	0.0756505	0.939697	1	FALSE
ACVR1	580.522	-0.000360672	0.226242	-0.00159418	0.998728	1	FALSE
ACVR1B	2514.18	0.0549001	0.212319	0.258573	0.795964	1	FALSE
ACVR1C	217.02	0.0912966	0.43567	0.209554	0.834015	1	FALSE
ACVR2A	970.557	-0.444833	0.267315	-1.66408	0.096097	1	FALSE
ACVR2B	3830.94	-0.559422	0.33934	-1.64856	0.0992384	1	FALSE
ACVR2B-AS1	98.4888	-0.00772958	0.233126	-0.0331562	0.97355	1	FALSE
ACVRL1	25.5993	0.433114	0.409815	1.05685	0.290579	1	FALSE
ACY1	11.8145	0.681122	0.419398	1.62405	0.104366	1	FALSE
ACY3	35.4541	0.620373	0.430424	1.44131	0.149498	1	FALSE
ACYP1	123.034	-0.187394	0.289846	-0.646528	0.517938	1	FALSE
ACYP2	178.931	0.451654	0.227131	1.98852	0.0467545	1	FALSE
AD000684.2	18.4885	-0.353809	0.408734	-0.865621	0.386698	1	FALSE
AD000864.6	3.0444	-0.214409	0.45719	-0.468972	0.639089	1	FALSE
AD001527.4	3.03186	0.153361	0.453268	0.338344	0.735104	1	FALSE
ADA	143.804	0.346184	0.383878	0.901809	0.367158	1	FALSE
ADAD1	0.28437	-0.016144	0.148564	-0.108667	0.913467	1	FALSE
ADAD2	0.43795	-0.139385	0.254627	-0.547409	0.584098	1	FALSE
ADAL	256.949	-0.423541	0.164771	-2.57048	0.0101556	1	FALSE
ADAM10	4597.62	-0.509515	0.334033	-1.52534	0.127173	1	FALSE
ADAM11	56.6579	-0.0320153	0.317733	-0.100762	0.91974	1	FALSE
ADAM12	414.02	-0.110591	0.393615	-0.280961	0.77874	1	FALSE
ADAM15	400.33	0.460263	0.358771	1.28289	0.199531	1	FALSE
ADAM17	1807.12	-0.323305	0.240784	-1.34272	0.179364	1	FALSE
ADAM18	3.49354	0.302444	0.446137	0.677917	0.497825	1	FALSE
ADAM19	1023.85	-0.022507	0.290072	-0.077591	0.938153	1	FALSE
ADAM1B	1.05141	0.240068	0.320948	0.747999	0.454461	1	FALSE
ADAM2	14.9511	0.648134	0.442657	1.46419	0.143142	1	FALSE
ADAM20	1.9346	-0.550582	0.435296	-1.26484	0.205927	1	FALSE
ADAM20P1	3.84202	-0.0879513	0.456674	-0.192591	0.847279	1	FALSE
ADAM21	1.837	0.566078	0.44045	1.28523	0.198714	1	FALSE
ADAM21P1	2.37574	0.0429016	0.442336	0.0969887	0.922735	1	FALSE
ADAM22	427.559	-0.262181	0.315699	-0.830476	0.40627	1	FALSE
ADAM23	395.256	-0.294582	0.289831	-1.01639	0.309442	1	FALSE
ADAM28	113.867	-0.548678	0.384429	-1.42726	0.153506	1	FALSE
ADAM29	1.18303	0.247104	0.403767	0.611997	0.54054	1	FALSE
ADAM32	28.8169	0.646125	0.398849	1.61997	0.105238	1	FALSE
ADAM33	27.3643	-0.422654	0.398667	-1.06017	0.289068	1	FALSE
ADAM3A	1.34508	-0.485682	0.438781	-1.10689	0.268342	1	FALSE
ADAM3B	0.320597	0.0485187	0.173352	0.279886	0.779565	1	FALSE
ADAM7	0.0298636	0	0.134599	0	1	1	FALSE
ADAM8	484.46	-0.26937	0.337085	-0.799118	0.424222	1	FALSE
ADAM9	2799.49	-0.252637	0.352423	-0.716858	0.473462	1	FALSE
ADAMTS1	469.148	0.510314	0.452726	1.1272	0.259657	1	FALSE
ADAMTS10	821.836	-0.364116	0.179092	-2.03312	0.0420406	1	FALSE
ADAMTS12	933.944	0.0767089	0.342528	0.223949	0.822797	1	FALSE
ADAMTS13	508.16	-0.573894	0.253027	-2.26812	0.0233221	1	FALSE
ADAMTS14	20.4958	-0.147298	0.382342	-0.385253	0.70005	1	FALSE
ADAMTS15	63.3676	0.10276	0.373749	0.274943	0.78336	1	FALSE
ADAMTS16	742.391	-0.110536	0.313568	-0.352509	0.724456	1	FALSE
ADAMTS17	54.2849	0.0081358	0.393841	0.0206576	0.983519	1	FALSE
ADAMTS18	257.755	-0.0671577	0.428427	-0.156754	0.875439	1	FALSE
ADAMTS19	857.989	-0.283177	0.324388	-0.872957	0.382687	1	FALSE
ADAMTS19-AS1	17.1697	-0.468357	0.365199	-1.28247	0.199678	1	FALSE
ADAMTS2	164.535	0.237591	0.375239	0.633172	0.526621	1	FALSE
ADAMTS20	37.7572	-0.132194	0.456475	-0.289598	0.772124	1	FALSE
ADAMTS3	29.3462	-0.0738667	0.390464	-0.189177	0.849954	1	FALSE
ADAMTS4	41.7291	0.196474	0.316249	0.621262	0.534427	1	FALSE
ADAMTS5	144.071	0.0700539	0.433062	0.161764	0.871491	1	FALSE
ADAMTS6	259.908	-0.670237	0.32875	-2.03874	0.0414758	1	FALSE
ADAMTS7	2965.96	-0.190391	0.305659	-0.622889	0.533357	1	FALSE
ADAMTS7P1	27.8994	-0.336242	0.392054	-0.857641	0.391091	1	FALSE
ADAMTS7P3	35.0602	0.220666	0.447928	0.492638	0.622268	1	FALSE
ADAMTS7P4	0.791913	0.0837443	0.394858	0.212087	0.832039	1	FALSE
ADAMTS8	14.2124	0.450067	0.442077	1.01807	0.308643	1	FALSE
ADAMTS9	6018.42	0.00850302	0.337503	0.0251939	0.9799	1	FALSE
ADAMTS9-AS1	2.26043	-0.0247545	0.431262	-0.0574001	0.954226	1	FALSE
ADAMTS9-AS2	25.8392	-0.23432	0.387823	-0.604193	0.545715	1	FALSE
ADAMTSL1	128.1	-0.045686	0.350914	-0.130191	0.896415	1	FALSE
ADAMTSL2	19.1063	0.845999	0.41065	2.06015	0.0393844	1	FALSE
ADAMTSL3	88.2576	0.240258	0.377817	0.635911	0.524834	1	FALSE
ADAMTSL4	430.434	-0.273912	0.369085	-0.742137	0.458004	1	FALSE
ADAMTSL4-AS1	13.6791	0.00557396	0.457879	0.0121734	0.990287	1	FALSE
ADAMTSL5	75.8118	0.21314	0.3922	0.543447	0.586822	1	FALSE
ADAP1	75.7492	0.285357	0.406653	0.701722	0.482852	1	FALSE
ADAP2	43.655	0.157611	0.308232	0.511338	0.609115	1	FALSE
ADAR	8856.94	-0.00867752	0.223332	-0.0388548	0.969006	1	FALSE
ADARB1	416.153	-0.212198	0.194057	-1.09348	0.274182	1	FALSE
ADARB2	22.9449	0.107613	0.40935	0.262888	0.792637	1	FALSE
ADAT1	625.367	-0.241913	0.279299	-0.866144	0.386411	1	FALSE
ADAT2	244.204	-0.702602	0.253391	-2.77279	0.00555776	1	FALSE
ADAT3	99.0096	0.578577	0.431128	1.34201	0.179594	1	FALSE
ADCK1	231.723	0.19847	0.323191	0.614097	0.539151	1	FALSE
ADCK2	646.565	0.480281	0.323391	1.48514	0.137506	1	FALSE
ADCK5	322.601	0.522534	0.354975	1.47203	0.141012	1	FALSE
ADCY1	520.512	-0.19791	0.372094	-0.531883	0.594807	1	FALSE
ADCY10	11.3742	-0.0811319	0.419506	-0.193399	0.846647	1	FALSE
ADCY10P1	146.285	-0.247825	0.291465	-0.850272	0.395174	1	FALSE
ADCY2	377.005	0.263215	0.225035	1.16967	0.242136	1	FALSE
ADCY3	554.853	-0.327274	0.198949	-1.64502	0.0999665	1	FALSE
ADCY4	8.78517	-0.0950393	0.414232	-0.229435	0.818531	1	FALSE
ADCY5	1611.98	-0.0761823	0.275143	-0.276883	0.78187	1	FALSE
ADCY6	3601.32	-0.289315	0.276666	-1.04572	0.29569	1	FALSE
ADCY7	438.948	-0.441247	0.318646	-1.38476	0.166126	1	FALSE
ADCY8	21.843	0.134297	0.456069	0.294466	0.768402	1	FALSE
ADCY9	327.963	-0.362817	0.275397	-1.31744	0.187692	1	FALSE
ADCYAP1	8.46642	0.264263	0.447253	0.590859	0.554615	1	FALSE
ADCYAP1R1	13.5898	-0.0398391	0.403018	-0.0988517	0.921256	1	FALSE
ADD1	6703.7	0.0602285	0.129612	0.464683	0.642159	1	FALSE
ADD2	118.779	0.0687796	0.303711	0.226464	0.820841	1	FALSE
ADD3	4587.08	-0.38406	0.325425	-1.18018	0.237928	1	FALSE
ADD3-AS1	25.0486	-0.453694	0.344604	-1.31657	0.187984	1	FALSE
ADGB	26.2885	-0.383351	0.452623	-0.846954	0.397021	1	FALSE
ADGRA1	101.243	-0.135576	0.372595	-0.363869	0.715956	1	FALSE
ADGRA1-AS1	13.223	-0.289209	0.412716	-0.700746	0.483462	1	FALSE
ADGRA2	207.59	0.092251	0.307786	0.299724	0.764388	1	FALSE
ADGRA3	3837.11	-0.0522482	0.241403	-0.216436	0.828648	1	FALSE
ADGRB1	64.1014	0.13095	0.38684	0.338512	0.734978	1	FALSE
ADGRB2	502.981	-0.12488	0.296447	-0.421254	0.673569	1	FALSE
ADGRB3	60.7723	-0.152679	0.360688	-0.423299	0.672077	1	FALSE
ADGRD1	834.068	0.150333	0.338225	0.444476	0.656698	1	FALSE
ADGRD2	1.45786	-0.435882	0.436599	-0.998357	0.318106	1	FALSE
ADGRE2	9.71536	0.437625	0.449771	0.972995	0.330556	1	FALSE
ADGRE4P	0.0862211	0.0293591	0.1346	0.218122	0.827334	1	FALSE
ADGRE5	74.2569	0.496584	0.389243	1.27577	0.202037	1	FALSE
ADGRF1	13.5039	-0.0588641	0.436153	-0.134962	0.892642	1	FALSE
ADGRF2	6.85929	-0.153968	0.459371	-0.335171	0.737496	1	FALSE
ADGRF3	63.8091	-0.737028	0.32649	-2.25743	0.0239812	1	FALSE
ADGRF4	9.74107	0.0347598	0.439289	0.0791275	0.936931	1	FALSE
ADGRF5	7.86002	0.384636	0.451571	0.851771	0.394341	1	FALSE
ADGRF5P1	11.5802	0.196332	0.438178	0.448064	0.654107	1	FALSE
ADGRF5P2	0.126375	0.0117161	0.1346	0.0870438	0.930637	1	FALSE
ADGRG1	1651.54	0.189864	0.250608	0.757613	0.448683	1	FALSE
ADGRG2	267.458	0.0775017	0.37406	0.207191	0.835861	1	FALSE
ADGRG3	2.53851	0.0844796	0.450134	0.187677	0.85113	1	FALSE
ADGRG4	2.60286	0.713364	0.43833	1.62746	0.10364	1	FALSE
ADGRG5	43.3654	0.181053	0.337595	0.536303	0.591749	1	FALSE
ADGRG6	2793.62	-0.377947	0.408607	-0.924966	0.354984	1	FALSE
ADGRG7	36.5133	0.400601	0.396143	1.01125	0.311895	1	FALSE
ADGRL1	2473.86	-0.294937	0.20652	-1.42813	0.153254	1	FALSE
ADGRL2	3105.64	-0.189823	0.303835	-0.624755	0.532132	1	FALSE
ADGRL3	948.501	-0.184927	0.343411	-0.5385	0.590232	1	FALSE
ADGRL4	49.4943	0.433854	0.414923	1.04563	0.295734	1	FALSE
ADGRV1	1707.94	0.26552	0.383978	0.691497	0.489253	1	FALSE
ADH1A	12.376	0.023997	0.445719	0.0538389	0.957064	1	FALSE
ADH1B	2.23268	0.32632	0.422325	0.772674	0.439716	1	FALSE
ADH4	0.211921	0.00488787	0.134601	0.0363139	0.971032	1	FALSE
ADH5	5425.56	0.180994	0.152675	1.18549	0.235823	1	FALSE
ADH5P2	0.297504	0.00488441	0.22263	0.0219396	0.982496	1	FALSE
ADH5P3	0.707433	0.137042	0.353419	0.387762	0.698192	1	FALSE
ADH5P4	14.1175	0.671249	0.429738	1.562	0.118289	1	FALSE
ADH6	7.31716	1.18009	0.440774	2.67732	0.00742146	1	FALSE
ADHFE1	266.727	-0.350863	0.254222	-1.38014	0.167543	1	FALSE
ADI1	741.327	0.252862	0.269025	0.939918	0.34726	1	FALSE
ADIPOQ	0.118403	0.00984935	0.1346	0.0731749	0.941667	1	FALSE
ADIPOR1	1984.27	0.302783	0.179017	1.69136	0.0907673	1	FALSE
ADIPOR1P2	0.153938	0	0.1346	0	1	1	FALSE
ADIPOR2	2616.14	0.20124	0.206173	0.976072	0.329029	1	FALSE
ADIRF	1.77605	0.411242	0.409421	1.00445	0.315164	1	FALSE
ADIRF-AS1	127.267	-0.675436	0.332132	-2.03364	0.0419883	1	FALSE
ADK	490.592	0.366175	0.243965	1.50093	0.133373	1	FALSE
ADM	1663.62	0.0924576	0.385566	0.239797	0.810487	1	FALSE
ADM2	81.7523	0.139827	0.413398	0.338239	0.735183	1	FALSE
ADM5	40.2644	-0.625786	0.392472	-1.59447	0.11083	1	FALSE
ADNP	5187.02	-0.0373338	0.201778	-0.185024	0.85321	1	FALSE
ADNP-AS1	17.4938	0.00218715	0.376696	0.00580613	0.995367	1	FALSE
ADNP2	1619.64	-0.0454175	0.261781	-0.173494	0.862263	1	FALSE
ADO	859.969	0.205618	0.209341	0.982219	0.325992	1	FALSE
ADORA1	6.91024	0.466505	0.451882	1.03236	0.301904	1	FALSE
ADORA2A	26.1389	-0.244445	0.364449	-0.670724	0.502397	1	FALSE
ADORA2A-AS1	70.9777	0.5564	0.364696	1.52565	0.127097	1	FALSE
ADORA2B	22.5207	0.100267	0.440431	0.227656	0.819914	1	FALSE
ADORA3	0.225546	0.00752759	0.14363	0.0524096	0.958202	1	FALSE
ADPGK	1428.78	0.0930256	0.175219	0.530912	0.59548	1	FALSE
ADPGK-AS1	0.569135	-0.0642539	0.296226	-0.216908	0.82828	1	FALSE
ADPRH	71.4479	0.204715	0.288254	0.71019	0.477587	1	FALSE
ADPRHL1	98.2418	0.70383	0.329194	2.13804	0.0325132	1	FALSE
ADPRHL2	886.985	0.404529	0.296742	1.36324	0.172808	1	FALSE
ADPRM	192.856	0.396144	0.287889	1.37603	0.168812	1	FALSE
ADRA1A	0.375863	0.0989777	0.200818	0.492874	0.622102	1	FALSE
ADRA1B	13.744	0.448956	0.458923	0.978282	0.327935	1	FALSE
ADRA1D	5.13535	0.270708	0.409859	0.660489	0.50894	1	FALSE
ADRA2A	755.858	0.0303201	0.386775	0.0783922	0.937516	1	FALSE
ADRA2B	51.482	0.335991	0.402248	0.835284	0.403558	1	FALSE
ADRA2C	90.2903	0.434135	0.421672	1.02956	0.303218	1	FALSE
ADRB1	5.21258	0.153652	0.449029	0.342187	0.73221	1	FALSE
ADRB2	4.01997	-0.0508626	0.456815	-0.111342	0.911345	1	FALSE
ADRB3	1.26548	0.0721382	0.4073	0.177113	0.85942	1	FALSE
ADRM1	2450.68	0.750301	0.359333	2.08804	0.0367944	1	FALSE
ADSL	1755.82	0.507415	0.251703	2.01592	0.043808	1	FALSE
ADSS	988.832	-0.120326	0.265299	-0.45355	0.650152	1	FALSE
ADSSL1	319.007	0.0312103	0.249568	0.125057	0.900478	1	FALSE
ADTRP	1.04277	0.417337	0.386487	1.07982	0.280221	1	FALSE
AE000658.22	0.301483	-0.0331679	0.198678	-0.166943	0.867415	1	FALSE
AE000658.25	3.30825	0.0814039	0.430559	0.189066	0.850041	1	FALSE
AE000660.4	0.0663103	-0.0301792	0.134599	-0.224215	0.82259	1	FALSE
AE000661.37	4.18958	0.530697	0.434362	1.22178	0.221789	1	FALSE
AE000661.50	0.0593374	0	0.134599	0	1	1	FALSE
AE000662.93	0.176681	0	0.134601	0	1	1	FALSE
AEBP1	1658.79	-0.404602	0.253759	-1.59443	0.11084	1	FALSE
AEBP2	696.258	-0.391069	0.257457	-1.51897	0.128771	1	FALSE
AEN	959.213	0.336629	0.348995	0.964566	0.334762	1	FALSE
AES	8586.47	0.33311	0.317819	1.04811	0.294587	1	FALSE
AF001548.5	26.5605	-0.0885596	0.391434	-0.226244	0.821012	1	FALSE
AF001548.6	1.35002	0.237561	0.39736	0.597848	0.549942	1	FALSE
AF003625.3	0.983762	-0.0139852	0.395186	-0.0353889	0.97177	1	FALSE
AF011889.2	14.5953	-0.852344	0.414107	-2.05827	0.0395642	1	FALSE
AF011889.5	33.4199	-0.607109	0.399496	-1.51969	0.12859	1	FALSE
AF013593.1	0.355515	-0.0172051	0.247153	-0.0696131	0.944502	1	FALSE
AF015262.2	1.57117	-0.0755774	0.438044	-0.172534	0.863018	1	FALSE
AF038458.3	2.38359	0.010661	0.453017	0.0235332	0.981225	1	FALSE
AF038458.5	1.34637	-0.0504893	0.431097	-0.117118	0.906766	1	FALSE
AF064858.10	8.63138	-0.0535415	0.447	-0.11978	0.904658	1	FALSE
AF064858.11	4.73041	0.521132	0.446931	1.16602	0.243605	1	FALSE
AF064858.6	2.62852	0.0629797	0.451702	0.139428	0.889112	1	FALSE
AF064858.7	1.13126	-0.658813	0.399709	-1.64823	0.0993047	1	FALSE
AF064858.8	7.72051	-0.140926	0.451779	-0.311935	0.75509	1	FALSE
AF064860.5	1.08243	0.243058	0.396123	0.613591	0.539486	1	FALSE
AF064860.7	3.30107	-0.174119	0.454912	-0.382753	0.701903	1	FALSE
AF067845.1	0.828472	0.360639	0.360553	1.00024	0.317195	1	FALSE
AF067845.2	0.757417	0.0821816	0.359676	0.228488	0.819267	1	FALSE
AF067845.3	1.97385	0.334151	0.424488	0.787186	0.431173	1	FALSE
AF121897.4	0.110466	0	0.1346	0	1	1	FALSE
AF121898.3	0.2418	-0.0313716	0.145779	-0.215199	0.829612	1	FALSE
AF124730.4	0.0394333	0.000110224	0.134599	0.000818905	0.999347	1	FALSE
AF127577.10	0.0815318	0	0.1346	0	1	1	FALSE
[truncated: 35,702 more rows]
