# Supplementary material for: A human ESC-based screen identifies a role for the translated lncRNA LINC00261 in pancreatic endocrine differentiation
Source: eLife. 2020 Aug 3;9:e58659. doi: 10.7554/eLife.58659 (PMC7423336; doi:10.7554/eLife.58659)
Supplement: Figure 4—source data 3. [file elife-58659-fig4-data3.xlsx]

## Sheet: Insulin Flow Cytometry
	LINC00261 clone 1		LINC00261 clone 2		LINC00261 clone 3		LINC00261 clone 4		sORF1/2		sORF3 clone 1		sORF3 clone 2		sORF4 clone 1		sORF4 clone 2		sORF5 clone 1		sORF5 clone 2		sORF6 clone 1		sORF6 clone 2		sORF7 clone 1		sORF7 clone 2
	control	KO	control	KO	control	KO	control	KO	control	FS	control	FS	control	FS	control	FS	control	FS	control	FS	control	FS	control	FS	control	FS	control	FS	control	FS
%INS+	9.8	3.45	10.6	9.91	18.1	12.8	12.3	15.8	13.4	11.2	13.4	10.5	9.1	10.3	15.5	14.2	15.5	16.4	17.9	12.4	17.9	15.8	15.5	10.6	15.5	13.1	32.5	16.5	32.5	17.1
	14.3	6.2	12.6	8.5	12.3	10.7	14.3	6.84	9.1	10.4	9.1	12.2	24.2	23.9	14.7	14.2	14.7	10.8	17.4	10.6	17.4	18.4	14.7	9.94	14.7	16.9	19.7	12.7	19.7	10.5
	12.98	7.77	14.3	6.92	12.98	9.15	12.98	6.84	24.2	25.1	24.2	24	13.4	13.1	9.91	8.12	9.91	11.5	19.8	10.4	19.8	25.4	9.91	8.9	9.91	21.5	17	11.9	17	10.3
	18.34	7.88	12.98	6.92	12.98	7.72	18.34	5.69	13.4	12.8	13.4	13.3	13.5	13.3	10.1	16.9	10.1	8.4	13.1	16.1	13.1	23.4	10.1	15.7	10.1	15.2	19.8	14.3	19.8	12.1
	16.5	7.59	18.34	8.01	18.34	9.37	16.5	5.66	13.5	15.1	13.5	14.9			25	16.1	25	15.5	10.6	17.8			19.8	20.9	19.8		24.7	13.4	24.7	20.3
			16.5	6.86	18.34	11.3			14.72	14.92					23.6	9.82	23.6	10.9	11.1	10.7			23.6	14.1	23.6			10.8	10.6	13.6
					16.5	9.67									10.6				12.2									7.59	11.1	12.8
					16.5	8.57													12.7										19.4
mean	14.384	6.578	14.22	7.85333	15.6486	10.1014	14.884	8.166	14.72	14.92	14.72	14.98	15.05	15.15	15.63	13.2233	16.4683	12.25	14.5857	13	17.05	20.75	15.6017	13.3567	15.6017	16.675	22.74	12.4557	19.3429	13.8143
standard deviation	3.28324	1.87533	2.80876	1.21668	2.59977	1.62247	2.50992	4.30712	5.02848	5.33719	5.62201	5.29122	6.43558	5.99194	6.33508	3.50221	6.50049	3.06904	3.48753	3.1881	2.82902	4.42229	5.38676	4.51841	5.38676	3.57246	6.12234	2.81171	7.09144	3.65624

## Sheet: Total Insulin Content
	LINC00261 clone 1		LINC00261 clone 2		LINC00261 clone 3		LINC00261 clone 4		sORF1/2		sORF3 clone 1		sORF3 clone 2		sORF4 clone 1		sORF4 clone 2		sORF5 clone 1		sORF5 clone 2		sORF6 clone 1		sORF6 clone 2		sORF7 clone 1		sORF7 clone 2
	control	KO	control	KO	control	KO	control	KO	control	FS	control	FS	control	FS	control	FS	control	FS	control	FS	control	FS	control	FS	control	FS	control	FS	control	FS
mIU insulin/mg protein	11.4465	5.46354	11.4465	3.20397	11.4465	13.5803	11.4465	1.6999	11.9199	19.8736	11.9199	10.5609	11.9199	11.1956	15.2707	13.98	14.43	7.83	10.04	10.13	16.09	34.02	13.98	9.5	7.83	7.99	13.98	8.53	13.98	10.41
	8.67167	4.8798	8.67167	3.70572	8.67167	13.6734	8.67167	4.46068	12.8091	18.8752	12.8091	12.3312	12.8091	18.9102	15.9458	17.65	18.48	11.53	20.6	17.15	15.04	5.84	17.65	15	11.53	10.82	17.65	11.74	17.65	12.62
	10.1832	5.69367	10.1832		10.1832	4.72322	10.1832	2.37587	10.3964	8.65875	10.3964	9.09025	6.54	8.52	11.041	16.09	5.73	7.06	12.94	9.12	22.15	27.27	16.09	5.49	7.06	14.76	16.09	8.86	16.09	7.75
	12.2581		12.2581		12.2581	4.52275	12.2581	5.02684	7.76681	8.35067	7.76681	6.51447	9.53859	10.2258	13.1103	15.04	19.47	16.78	10.38	17.34	15.38	12.5	15.04	16.53	16.78	14.63	15.04	13.94	15.04	21.16
	10.3993		10.3993		10.3993	4.06286	10.3993	2.16202	6.54	15.37	6.54	15.45	13.5693	14.7875	10.0736	22.15	13.04	8.35		11.69	7.83	22.95	22.15	9.14	8.35		22.15	10.08	22.15	16.05
	26.4523		26.4523		26.4523	4.72322	26.4523	2.37587	4.72	10.68	4.72	21.46	9.81628	12.573	15.73	15.38	9.89	7.58		10.28	11.53		15.38	10.97	7.58		15.38	9.05	15.38	14.98
	17.9078		17.9078		17.9078	2.37587	17.9078	5.02684	20.92	16.62	18.26	15.37			6.33964	7.83	12.6837	9.63			7.06		7.83		9.63		7.83		7.83
	18.879		18.879		18.879	5.02684	18.879	2.16202	18.26	11.71	9.53859	9.88903			3.73243	11.53		15			16.78		11.53		15		11.53		11.53
	23.2276		23.2276		23.2276	2.16202	23.2276	4.084	9.53859	10.1189	13.5693	16.5437				7.06		14.98			8.35		7.06		14.98		7.06		7.06
	19.9295		19.9295		19.9295	2.91903	19.9295	1.43399	13.5693	13.789	9.81628	10.2903				16.78		9.5			7.58		16.78		9.5		16.78		16.78
	27.039		27.039		27.039	5.07654	27.039	3.57943	9.81628	10.6826						8.35		14.85			9.63		8.35		14.85		8.35		8.35
	6.091				9.53859	6.04164	9.53859	5.01294								7.58		10.07			15		7.58		10.07		7.58		7.58
	7.90755				11.7527	6.78712	11.7527	3.0814								9.63		11.04			14.98		9.63		11.04		9.63		9.63
	12.0224				10.1189	9.62465	10.1189									15		11.36			9.5		15		11.36		15		15
	7.93301				9.88903		9.88903									14.98		8.31			14.85		14.98		8.31		14.98		14.98
	6.55419				10.2258		10.2258									9.5		13.56			10.07		9.5		13.56		9.5		9.5
	6.93866				13.5693		13.5693									14.85					11.04		14.85				14.85		14.85
	9.81628				13.789		13.789									10.07					11.36		10.07				10.07		10.07
	9.32112				16.5437		16.5437									11.04					8.31		11.04				11.04		11.04
	10.6826				14.7875		14.7875									11.36					13.56		11.36				11.36		11.36
	10.2903				13.5391		13.5391									8.31							8.31				8.31		8.31
	12.573				6.091		6.091									13.56							13.56				13.56		13.56
	12.7318				7.90755		7.90755
					12.0224		12.0224
					7.93301		7.93301
					6.55419		6.55419
					6.93866		6.93866
					9.81628		9.81628
					9.32112		9.32112
					10.6826		10.6826
					10.2903		10.2903
					12.573		12.573
					12.7318		12.7318
mean	13.0111	5.34567	16.9449	3.45485	12.8185	6.09282	12.8185	3.26783	11.4778	13.1572	10.5336	12.75	10.6989	12.702	11.4054	12.6236	13.3891	11.0894	13.49	12.6183	12.3045	20.516	12.6236	11.105	11.0894	12.05	12.6236	10.3667	12.6236	13.8283
standard deviation	6.18262	0.419546	6.74195	0.354795	5.29169	3.70376	5.29169	1.33269	4.82708	4.02512	3.87209	4.42077	2.59247	3.70936	4.5294	3.93034	4.75225	3.09223	4.91356	3.67668	3.94207	11.3307	3.93034	4.06412	3.09223	3.26583	3.93034	2.10304	3.93034	4.69269
